# Supplementary material for: MYT1L is required for suppressing earlier neuronal development programs in the adult mouse brain
Source: Genome Res. 2023 Apr;33(4):541–56. doi: 10.1101/gr.277413.122 (PMC10234307; doi:10.1101/gr.277413.122)
Supplement: Supplemental Material [file supp_gr.277413.122_Supplemental_Table_S1.xlsx]

## Sheet: Sequencing Stats
Supplemental Table S1. CUT&RUN sequencing metrics and peak profiles.
	Library Names	Genotype	Age-Tissue	Unique Mapped Reads	q Value Cut-off	Peak Number
	MYT1L-E14-CUT&RUN-WT-Biological Replicate-1	WT	E14-CTX	34559405	0.05	4275
	MYT1L-E14-CUT&RUN-WT-Biological Replicate-2	WT	E14-CTX	11983602	0.05	3751
	MYT1L-E14-CUT&RUN-WT-Biological Replicate-3	WT	E14-CTX	35471646	0.05	1475
	MYT1L-E14-CUT&RUN-WT-merged-alignment	WT	E14-CTX	NA	0.01	20495
	H3K4me1-E14-CUT&RUN-WT-Biological Replicate-1	WT	E14-CTX	5693505	NA	NA
	H3K4me1-E14-CUT&RUN-WT-Biological Replicate-2	WT	E14-CTX	6199361	NA	NA
	H3K4me1-E14-CUT&RUN-WT-merged-alignment	WT	E14-CTX	NA	0.05	117037
	H3K4me3-E14-CUT&RUN-WT-Biological Replicate-1	WT	E14-CTX	2519321	NA	NA
	H3K4me3-E14-CUT&RUN-WT-Biological Replicate-2	WT	E14-CTX	2146602	NA	NA
	H3K4me3-E14-CUT&RUN-WT-merged-alignment	WT	E14-CTX	NA	0.05	18031
	H3K27ac-E14-CUT&RUN-WT-Biological Replicate-1	WT	E14-CTX	10908554	NA	NA
	H3K27ac-E14-CUT&RUN-WT-Biological Replicate-2	WT	E14-CTX	17140460	NA	NA
	H3K27ac-E14-CUT&RUN-WT-merged-alignment	WT	E14-CTX	NA	0.05	47302
	IgG-E14-CUT&RUN-WT-Biological Replicate-1	WT	E14-CTX	29127146	NA	NA
	IgG-E14-CUT&RUN-WT-Biological Replicate-2	WT	E14-CTX	38242919	NA	NA
	IgG-E14-CUT&RUN-WT-Biological Replicate-3	WT	E14-CTX	25343864	NA	NA
	MYT1L-E14-CUT&RUN-KO-Biological Replicate-1	KO	E14-CTX	18595843	0.05	0
	MYT1L-E14-CUT&RUN-KO-Biological Replicate-2	KO	E14-CTX	19062999	0.05	0
	MYT1L-E14-CUT&RUN-KO-Biological Replicate-3	KO	E14-CTX	25696182	0.05	0
	MYT1L-E14-CUT&RUN-KO-merged-alignment	KO	E14-CTX	NA	0.01	208
	H3K4me1-E14-CUT&RUN-KO-Biological Replicate-1	KO	E14-CTX	11492641	NA	NA
	H3K4me1-E14-CUT&RUN-KO-Biological Replicate-2	KO	E14-CTX	9095502	NA	NA
	H3K4me3-E14-CUT&RUN-KO-Biological Replicate-1	KO	E14-CTX	5761292	NA	NA
	H3K4me3-E14-CUT&RUN-KO-Biological Replicate-2	KO	E14-CTX	2390121	NA	NA
	H3K27ac-E14-CUT&RUN-KO-Biological Replicate-1	KO	E14-CTX	10382486	NA	NA
	H3K27ac-E14-CUT&RUN-KO-Biological Replicate-2	KO	E14-CTX	8865239	NA	NA
	IgG-E14-CUT&RUN-KO-Biological Replicate-1	KO	E14-CTX	4101872	NA	NA
	IgG-E14-CUT&RUN-KO-Biological Replicate-2	KO	E14-CTX	22987167	NA	NA
	IgG-E14-CUT&RUN-KO-Biological Replicate-3	KO	E14-CTX	20388937	NA	NA
	MYT1L-PFC-CUT&RUN-WT-Biological Replicate-1	WT	PFC-CTX	54677078	0.05	46418
	MYT1L-PFC-CUT&RUN-WT-Biological Replicate-2	WT	PFC-CTX	51257538	0.05	67914
	MYT1L-PFC-CUT&RUN-WT-Biological Replicate-3	WT	PFC-CTX	37267546	0.05	41570
	MYT1L-PFC-CUT&RUN-WT-merged-alignment	WT	PFC-CTX	NA	0.01	115159
	H3K4me1-PFC-CUT&RUN-WT-Biological Replicate-1	WT	PFC-CTX	10158320	NA	NA
	H3K4me1-PFC-CUT&RUN-WT-Biological Replicate-2	WT	PFC-CTX	10538658	NA	NA
	H3K4me1-PFC-CUT&RUN-WT-Biological Replicate-3	WT	PFC-CTX	9928594	NA	NA
	H3K4me1-PFC-CUT&RUN-WT-merged-alignment	WT	PFC-CTX	NA	0.05	136374
	H3K4me3-PFC-CUT&RUN-WT-Biological Replicate-1	WT	PFC-CTX	6786134	NA	NA
	H3K4me3-PFC-CUT&RUN-WT-Biological Replicate-2	WT	PFC-CTX	7334220	NA	NA
	H3K4me3-PFC-CUT&RUN-WT-Biological Replicate-3	WT	PFC-CTX	7943060	NA	NA
	H3K4me3-PFC-CUT&RUN-WT-merged-alignment	WT	PFC-CTX	NA	0.05	20686
	H3K27ac-PFC-CUT&RUN-WT-Biological Replicate-1	WT	PFC-CTX	7429634	NA	NA
	H3K27ac-PFC-CUT&RUN-WT-Biological Replicate-2	WT	PFC-CTX	8904778	NA	NA
	H3K27ac-PFC-CUT&RUN-WT-Biological Replicate-3	WT	PFC-CTX	9261138	NA	NA
	H3K27ac-PFC-CUT&RUN-WT-merged-alignment	WT	PFC-CTX	NA	0.05	83068
	IgG-PFC-CUT&RUN-WT-Biological Replicate-1	WT	PFC-CTX	36657604	NA	NA
	IgG-PFC-CUT&RUN-WT-Biological Replicate-2	WT	PFC-CTX	32821792	NA	NA
	IgG-PFC-CUT&RUN-WT-Biological Replicate-3	WT	PFC-CTX	33566206	NA	NA
	MYT1L-PFC-CUT&RUN-Het-Biological Replicate-1	Het	PFC-CTX	62248752	NA	NA
	MYT1L-PFC-CUT&RUN-Het-Biological Replicate-2	Het	PFC-CTX	46901726	NA	NA
	MYT1L-PFC-CUT&RUN-Het-Biological Replicate-3	Het	PFC-CTX	39647218	NA	NA
	MYT1L-PFC-CUT&RUN-Het-merged-alignment	Het	PFC-CTX	NA	0.01	107400
	H3K4me1-PFC-CUT&RUN-Het-Biological Replicate-1	Het	PFC-CTX	8417344	NA	NA
	H3K4me1-PFC-CUT&RUN-Het-Biological Replicate-2	Het	PFC-CTX	9294724	NA	NA
	H3K4me1-PFC-CUT&RUN-Het-Biological Replicate-3	Het	PFC-CTX	9513532	NA	NA
	H3K4me3-PFC-CUT&RUN-Het-Biological Replicate-1	Het	PFC-CTX	5567770	NA	NA
	H3K4me3-PFC-CUT&RUN-Het-Biological Replicate-2	Het	PFC-CTX	8086918	NA	NA
	H3K4me3-PFC-CUT&RUN-Het-Biological Replicate-3	Het	PFC-CTX	7982212	NA	NA
	H3K27ac-PFC-CUT&RUN-Het-Biological Replicate-1	Het	PFC-CTX	7821048	NA	NA
	H3K27ac-PFC-CUT&RUN-Het-Biological Replicate-2	Het	PFC-CTX	6830480	NA	NA
	H3K27ac-PFC-CUT&RUN-Het-Biological Replicate-3	Het	PFC-CTX	7659174	NA	NA
	IgG-PFC-CUT&RUN-Het-Biological Replicate-1	Het	PFC-CTX	32981964	NA	NA
	IgG-PFC-CUT&RUN-Het-Biological Replicate-2	Het	PFC-CTX	32171426	NA	NA
	IgG-PFC-CUT&RUN-Het-Biological Replicate-3	Het	PFC-CTX	19732732	NA	NA

## Sheet: MYT1L_CR_E14_CTX_Peaks_Merged
chr1	3119977	3120419	cr_wt.0.01_peak_1
chr1	4571460	4572256	cr_wt.0.01_peak_2
chr1	4785272	4786578	cr_wt.0.01_peak_3
chr1	4807440	4807853	cr_wt.0.01_peak_4
chr1	4857201	4857734	cr_wt.0.01_peak_5
chr1	4857913	4858331	cr_wt.0.01_peak_6
chr1	5019199	5019733	cr_wt.0.01_peak_7
chr1	5022905	5023710	cr_wt.0.01_peak_8
chr1	5082596	5083479	cr_wt.0.01_peak_9
chr1	6483609	6483873	cr_wt.0.01_peak_11
chr1	6593111	6593371	cr_wt.0.01_peak_12
chr1	6729251	6730693	cr_wt.0.01_peak_13
chr1	6732155	6732916	cr_wt.0.01_peak_14
chr1	6734019	6734413	cr_wt.0.01_peak_15
chr1	6734844	6735300	cr_wt.0.01_peak_16
chr1	6735511	6735953	cr_wt.0.01_peak_17
chr1	6738628	6739811	cr_wt.0.01_peak_18
chr1	6825276	6825750	cr_wt.0.01_peak_19
chr1	7088318	7090193	cr_wt.0.01_peak_20
chr1	7396635	7396817	cr_wt.0.01_peak_21
chr1	7397083	7398650	cr_wt.0.01_peak_22
chr1	9298615	9298897	cr_wt.0.01_peak_23
chr1	9299199	9300305	cr_wt.0.01_peak_24
chr1	9544981	9545314	cr_wt.0.01_peak_25
chr1	9700415	9700771	cr_wt.0.01_peak_26
chr1	9748378	9748872	cr_wt.0.01_peak_27
chr1	9943383	9944441	cr_wt.0.01_peak_28
chr1	10037433	10038510	cr_wt.0.01_peak_29
chr1	10039782	10040210	cr_wt.0.01_peak_30
chr1	10232062	10232372	cr_wt.0.01_peak_31
chr1	10232560	10232796	cr_wt.0.01_peak_32
chr1	10232982	10233301	cr_wt.0.01_peak_33
chr1	10596343	10596545	cr_wt.0.01_peak_34
chr1	10871382	10871935	cr_wt.0.01_peak_35
chr1	11045586	11046023	cr_wt.0.01_peak_36
chr1	11414074	11414512	cr_wt.0.01_peak_37
chr1	11567123	11567416	cr_wt.0.01_peak_38
chr1	11567607	11567907	cr_wt.0.01_peak_39
chr1	11937034	11937395	cr_wt.0.01_peak_40
chr1	12092259	12092616	cr_wt.0.01_peak_41
chr1	12367108	12367307	cr_wt.0.01_peak_42
chr1	12833447	12833619	cr_wt.0.01_peak_43
chr1	12836019	12836195	cr_wt.0.01_peak_44
chr1	12836437	12836955	cr_wt.0.01_peak_45
chr1	12990428	12990595	cr_wt.0.01_peak_46
chr1	12991142	12992887	cr_wt.0.01_peak_47
chr1	13371861	13372941	cr_wt.0.01_peak_48
chr1	13373648	13374011	cr_wt.0.01_peak_49
chr1	13425805	13426019	cr_wt.0.01_peak_50
chr1	13590459	13590847	cr_wt.0.01_peak_51
chr1	13660017	13660609	cr_wt.0.01_peak_52
chr1	14108404	14109277	cr_wt.0.01_peak_53
chr1	14294063	14294359	cr_wt.0.01_peak_54
chr1	14309577	14310213	cr_wt.0.01_peak_55
chr1	14755505	14755721	cr_wt.0.01_peak_56
chr1	15286630	15286895	cr_wt.0.01_peak_57
chr1	15287067	15287545	cr_wt.0.01_peak_58
chr1	15287722	15287947	cr_wt.0.01_peak_59
chr1	15383540	15383738	cr_wt.0.01_peak_60
chr1	15616539	15616719	cr_wt.0.01_peak_61
chr1	15805522	15806125	cr_wt.0.01_peak_62
chr1	16104080	16105344	cr_wt.0.01_peak_63
chr1	16518669	16519064	cr_wt.0.01_peak_64
chr1	16519890	16520295	cr_wt.0.01_peak_65
chr1	16618723	16619904	cr_wt.0.01_peak_66
chr1	16656339	16657988	cr_wt.0.01_peak_67
chr1	16664961	16665990	cr_wt.0.01_peak_68
chr1	17097634	17097883	cr_wt.0.01_peak_69
chr1	17145360	17145656	cr_wt.0.01_peak_70
chr1	18191532	18192124	cr_wt.0.01_peak_71
chr1	18292934	18293155	cr_wt.0.01_peak_72
chr1	18307634	18308529	cr_wt.0.01_peak_73
chr1	18308767	18308935	cr_wt.0.01_peak_74
chr1	20428375	20428560	cr_wt.0.01_peak_75
chr1	20820189	20820726	cr_wt.0.01_peak_76
chr1	20890762	20891517	cr_wt.0.01_peak_77
chr1	20951116	20952140	cr_wt.0.01_peak_78
chr1	21079001	21079441	cr_wt.0.01_peak_79
chr1	21166421	21167000	cr_wt.0.01_peak_80
chr1	21411378	21412032	cr_wt.0.01_peak_81
chr1	21461031	21461213	cr_wt.0.01_peak_82
chr1	21660600	21661429	cr_wt.0.01_peak_83
chr1	21804034	21804313	cr_wt.0.01_peak_84
chr1	21922510	21923375	cr_wt.0.01_peak_85
chr1	21961177	21961349	cr_wt.0.01_peak_86
chr1	22261519	22261816	cr_wt.0.01_peak_87
chr1	22533124	22533437	cr_wt.0.01_peak_88
chr1	22533626	22534005	cr_wt.0.01_peak_89
chr1	23097874	23098924	cr_wt.0.01_peak_90
chr1	23255663	23257076	cr_wt.0.01_peak_91
chr1	23379418	23380538	cr_wt.0.01_peak_92
chr1	23382842	23383106	cr_wt.0.01_peak_93
chr1	23761731	23761910	cr_wt.0.01_peak_94
chr1	23763605	23764097	cr_wt.0.01_peak_95
chr1	23846102	23846671	cr_wt.0.01_peak_96
chr1	23884044	23884843	cr_wt.0.01_peak_97
chr1	23922323	23922609	cr_wt.0.01_peak_98
chr1	24005236	24005981	cr_wt.0.01_peak_99
chr1	24099709	24100837	cr_wt.0.01_peak_100
chr1	24134810	24134992	cr_wt.0.01_peak_101
chr1	24222867	24223455	cr_wt.0.01_peak_102
chr1	24226499	24227337	cr_wt.0.01_peak_103
chr1	24248857	24249190	cr_wt.0.01_peak_104
chr1	24515547	24515733	cr_wt.0.01_peak_105
chr1	24678455	24678989	cr_wt.0.01_peak_106
chr1	25085919	25086222	cr_wt.0.01_peak_107
chr1	25105641	25105817	cr_wt.0.01_peak_108
chr1	25165794	25166599	cr_wt.0.01_peak_109
chr1	25179906	25180201	cr_wt.0.01_peak_110
chr1	25185955	25186141	cr_wt.0.01_peak_111
chr1	25228045	25228470	cr_wt.0.01_peak_112
chr1	25229171	25229604	cr_wt.0.01_peak_113
chr1	25696754	25697651	cr_wt.0.01_peak_114
chr1	25745813	25746019	cr_wt.0.01_peak_115
chr1	25775746	25775912	cr_wt.0.01_peak_116
chr1	25830248	25830819	cr_wt.0.01_peak_117
chr1	25831185	25831352	cr_wt.0.01_peak_118
chr1	25862107	25862276	cr_wt.0.01_peak_119
chr1	25892665	25893180	cr_wt.0.01_peak_120
chr1	26289725	26289932	cr_wt.0.01_peak_121
chr1	27616591	27616855	cr_wt.0.01_peak_123
chr1	27628963	27629243	cr_wt.0.01_peak_124
chr1	27641702	27642221	cr_wt.0.01_peak_125
chr1	27642453	27642627	cr_wt.0.01_peak_126
chr1	28144553	28145029	cr_wt.0.01_peak_127
chr1	28214587	28214751	cr_wt.0.01_peak_128
chr1	30700670	30701586	cr_wt.0.01_peak_129
chr1	30778643	30779074	cr_wt.0.01_peak_130
chr1	30872687	30873374	cr_wt.0.01_peak_131
chr1	30873618	30874150	cr_wt.0.01_peak_132
chr1	30949179	30950792	cr_wt.0.01_peak_133
chr1	31064727	31065743	cr_wt.0.01_peak_134
chr1	31449253	31449415	cr_wt.0.01_peak_135
chr1	31636814	31637641	cr_wt.0.01_peak_136
chr1	32172181	32173388	cr_wt.0.01_peak_137
chr1	32173735	32173900	cr_wt.0.01_peak_138
chr1	32174137	32174497	cr_wt.0.01_peak_139
chr1	32174737	32175470	cr_wt.0.01_peak_140
chr1	32197183	32197573	cr_wt.0.01_peak_141
chr1	32432936	32433226	cr_wt.0.01_peak_142
chr1	32462873	32463730	cr_wt.0.01_peak_143
chr1	32552533	32552749	cr_wt.0.01_peak_144
chr1	32553714	32554086	cr_wt.0.01_peak_145
chr1	32632894	32633246	cr_wt.0.01_peak_146
chr1	33669562	33670316	cr_wt.0.01_peak_147
chr1	33671658	33671848	cr_wt.0.01_peak_148
chr1	33720093	33720654	cr_wt.0.01_peak_149
chr1	33814133	33814435	cr_wt.0.01_peak_150
chr1	33814634	33815003	cr_wt.0.01_peak_151
chr1	33907440	33907814	cr_wt.0.01_peak_152
chr1	33946880	33947412	cr_wt.0.01_peak_153
chr1	34005566	34005743	cr_wt.0.01_peak_154
chr1	34011234	34011732	cr_wt.0.01_peak_155
chr1	34099795	34099969	cr_wt.0.01_peak_156
chr1	34432669	34433253	cr_wt.0.01_peak_157
chr1	34433825	34433990	cr_wt.0.01_peak_158
chr1	34434172	34435172	cr_wt.0.01_peak_159
chr1	34439111	34440381	cr_wt.0.01_peak_160
chr1	34642679	34642841	cr_wt.0.01_peak_161
chr1	34842620	34842813	cr_wt.0.01_peak_162
chr1	34843129	34843431	cr_wt.0.01_peak_163
chr1	35749651	35750208	cr_wt.0.01_peak_164
chr1	35850188	35850355	cr_wt.0.01_peak_165
chr1	36065188	36065361	cr_wt.0.01_peak_166
chr1	36068365	36068655	cr_wt.0.01_peak_167
chr1	36095556	36095901	cr_wt.0.01_peak_168
chr1	36303646	36304022	cr_wt.0.01_peak_169
chr1	36307337	36307690	cr_wt.0.01_peak_170
chr1	36444719	36445252	cr_wt.0.01_peak_171
chr1	36445473	36445856	cr_wt.0.01_peak_172
chr1	36470888	36471693	cr_wt.0.01_peak_173
chr1	36511529	36512188	cr_wt.0.01_peak_174
chr1	36528550	36528902	cr_wt.0.01_peak_175
chr1	36546925	36547263	cr_wt.0.01_peak_176
chr1	36556000	36557067	cr_wt.0.01_peak_177
chr1	36557354	36558156	cr_wt.0.01_peak_178
chr1	36603328	36603573	cr_wt.0.01_peak_179
chr1	36691185	36691506	cr_wt.0.01_peak_180
chr1	36709408	36709982	cr_wt.0.01_peak_181
chr1	36710247	36710449	cr_wt.0.01_peak_182
chr1	36784767	36785287	cr_wt.0.01_peak_183
chr1	36879344	36879626	cr_wt.0.01_peak_184
chr1	36939652	36940457	cr_wt.0.01_peak_185
chr1	37082019	37082224	cr_wt.0.01_peak_186
chr1	37097421	37097914	cr_wt.0.01_peak_187
chr1	37122728	37122974	cr_wt.0.01_peak_188
chr1	37299572	37300369	cr_wt.0.01_peak_189
chr1	37429497	37430448	cr_wt.0.01_peak_190
chr1	37540687	37541497	cr_wt.0.01_peak_191
chr1	37864361	37865679	cr_wt.0.01_peak_192
chr1	37871923	37872096	cr_wt.0.01_peak_193
chr1	37872304	37872490	cr_wt.0.01_peak_194
chr1	37996848	37998078	cr_wt.0.01_peak_195
chr1	38252480	38252724	cr_wt.0.01_peak_196
chr1	38437776	38439298	cr_wt.0.01_peak_197
chr1	38625773	38626010	cr_wt.0.01_peak_198
chr1	38626491	38626908	cr_wt.0.01_peak_199
chr1	38628118	38629333	cr_wt.0.01_peak_200
chr1	38631332	38633991	cr_wt.0.01_peak_201
chr1	38835800	38836767	cr_wt.0.01_peak_202
chr1	38897516	38897708	cr_wt.0.01_peak_203
chr1	38987421	38988219	cr_wt.0.01_peak_204
chr1	39251534	39252072	cr_wt.0.01_peak_205
chr1	39367259	39368334	cr_wt.0.01_peak_206
chr1	39478203	39478926	cr_wt.0.01_peak_207
chr1	39535116	39535700	cr_wt.0.01_peak_208
chr1	39577199	39577759	cr_wt.0.01_peak_209
chr1	39804389	39805398	cr_wt.0.01_peak_210
chr1	39901602	39901791	cr_wt.0.01_peak_211
chr1	39911393	39911708	cr_wt.0.01_peak_212
chr1	39947614	39947822	cr_wt.0.01_peak_213
chr1	40084197	40084926	cr_wt.0.01_peak_214
chr1	40085691	40086183	cr_wt.0.01_peak_215
chr1	40600784	40600980	cr_wt.0.01_peak_216
chr1	40789251	40789663	cr_wt.0.01_peak_217
chr1	40790450	40790782	cr_wt.0.01_peak_218
chr1	41001828	41002048	cr_wt.0.01_peak_219
chr1	41027472	41027951	cr_wt.0.01_peak_220
chr1	41032680	41032885	cr_wt.0.01_peak_221
chr1	41034823	41035734	cr_wt.0.01_peak_222
chr1	41054309	41054475	cr_wt.0.01_peak_223
chr1	41152892	41153242	cr_wt.0.01_peak_224
chr1	41153533	41153695	cr_wt.0.01_peak_225
chr1	41158098	41158340	cr_wt.0.01_peak_226
chr1	41605669	41606123	cr_wt.0.01_peak_227
chr1	41606298	41606523	cr_wt.0.01_peak_228
chr1	41652053	41653403	cr_wt.0.01_peak_229
chr1	41810570	41810944	cr_wt.0.01_peak_230
chr1	41814331	41814578	cr_wt.0.01_peak_231
chr1	41822702	41823260	cr_wt.0.01_peak_232
chr1	41916710	41917424	cr_wt.0.01_peak_233
chr1	42005915	42006950	cr_wt.0.01_peak_234
chr1	42229582	42231367	cr_wt.0.01_peak_235
chr1	42243501	42243708	cr_wt.0.01_peak_236
chr1	42257629	42257988	cr_wt.0.01_peak_237
chr1	42474492	42475026	cr_wt.0.01_peak_238
chr1	42539738	42539900	cr_wt.0.01_peak_239
chr1	42681596	42681863	cr_wt.0.01_peak_240
chr1	42685051	42685511	cr_wt.0.01_peak_241
chr1	42686364	42687193	cr_wt.0.01_peak_242
chr1	42691366	42692083	cr_wt.0.01_peak_243
chr1	42692287	42692950	cr_wt.0.01_peak_244
chr1	42693218	42696789	cr_wt.0.01_peak_245
chr1	42700236	42701034	cr_wt.0.01_peak_246
chr1	42703875	42704117	cr_wt.0.01_peak_247
chr1	42713517	42714352	cr_wt.0.01_peak_248
chr1	42850814	42851772	cr_wt.0.01_peak_249
chr1	42952722	42954046	cr_wt.0.01_peak_250
chr1	43092605	43092934	cr_wt.0.01_peak_251
chr1	43098476	43099150	cr_wt.0.01_peak_252
chr1	43130728	43130925	cr_wt.0.01_peak_253
chr1	43137047	43137515	cr_wt.0.01_peak_254
chr1	43139560	43139728	cr_wt.0.01_peak_255
chr1	43163761	43163927	cr_wt.0.01_peak_256
chr1	43445040	43446442	cr_wt.0.01_peak_257
chr1	43538677	43539255	cr_wt.0.01_peak_258
chr1	43827414	43828301	cr_wt.0.01_peak_259
chr1	43933422	43934579	cr_wt.0.01_peak_260
chr1	44042138	44042491	cr_wt.0.01_peak_261
chr1	44102130	44102367	cr_wt.0.01_peak_262
chr1	44118415	44120134	cr_wt.0.01_peak_263
chr1	44147620	44148819	cr_wt.0.01_peak_264
chr1	45794864	45795776	cr_wt.0.01_peak_265
chr1	46849579	46850280	cr_wt.0.01_peak_266
chr1	46852231	46854399	cr_wt.0.01_peak_267
chr1	47277665	47277870	cr_wt.0.01_peak_268
chr1	47278040	47278207	cr_wt.0.01_peak_269
chr1	47444584	47444825	cr_wt.0.01_peak_270
chr1	47961285	47963003	cr_wt.0.01_peak_271
chr1	50807335	50807531	cr_wt.0.01_peak_272
chr1	50926205	50928080	cr_wt.0.01_peak_273
chr1	51334118	51334528	cr_wt.0.01_peak_274
chr1	51418527	51418767	cr_wt.0.01_peak_275
chr1	51419123	51419349	cr_wt.0.01_peak_276
chr1	51477530	51479226	cr_wt.0.01_peak_277
chr1	51513068	51513388	cr_wt.0.01_peak_278
chr1	51644418	51644818	cr_wt.0.01_peak_279
chr1	51649987	51651049	cr_wt.0.01_peak_280
chr1	51915160	51915773	cr_wt.0.01_peak_281
chr1	52113680	52114059	cr_wt.0.01_peak_282
chr1	52118935	52119477	cr_wt.0.01_peak_283
chr1	52149984	52150648	cr_wt.0.01_peak_284
chr1	52231914	52232288	cr_wt.0.01_peak_285
chr1	52232755	52233939	cr_wt.0.01_peak_286
chr1	52260084	52260965	cr_wt.0.01_peak_287
chr1	52499239	52499786	cr_wt.0.01_peak_288
chr1	52500008	52500206	cr_wt.0.01_peak_289
chr1	52500419	52501062	cr_wt.0.01_peak_290
chr1	52520292	52520587	cr_wt.0.01_peak_291
chr1	52521625	52522261	cr_wt.0.01_peak_292
chr1	52523166	52523579	cr_wt.0.01_peak_293
chr1	52523831	52524536	cr_wt.0.01_peak_294
chr1	52578343	52578909	cr_wt.0.01_peak_295
chr1	52630347	52631126	cr_wt.0.01_peak_296
chr1	52726575	52726802	cr_wt.0.01_peak_297
chr1	52816434	52816949	cr_wt.0.01_peak_298
chr1	52844205	52845273	cr_wt.0.01_peak_299
chr1	53296537	53297526	cr_wt.0.01_peak_300
chr1	53313371	53313909	cr_wt.0.01_peak_301
chr1	53352342	53352953	cr_wt.0.01_peak_302
chr1	53784708	53785208	cr_wt.0.01_peak_303
chr1	53909376	53909548	cr_wt.0.01_peak_304
chr1	54193901	54194703	cr_wt.0.01_peak_305
chr1	54250221	54250579	cr_wt.0.01_peak_306
chr1	54438600	54438814	cr_wt.0.01_peak_307
chr1	54555473	54556051	cr_wt.0.01_peak_308
chr1	54556232	54556536	cr_wt.0.01_peak_309
chr1	54557135	54558336	cr_wt.0.01_peak_310
chr1	54579606	54580098	cr_wt.0.01_peak_311
chr1	54639882	54640334	cr_wt.0.01_peak_312
chr1	54703159	54704037	cr_wt.0.01_peak_313
chr1	54707407	54708527	cr_wt.0.01_peak_314
chr1	54898494	54899391	cr_wt.0.01_peak_315
chr1	54926139	54926372	cr_wt.0.01_peak_316
chr1	55026889	55027866	cr_wt.0.01_peak_317
chr1	55052121	55053223	cr_wt.0.01_peak_318
chr1	55087480	55088172	cr_wt.0.01_peak_319
chr1	55130757	55131488	cr_wt.0.01_peak_320
chr1	55236841	55237648	cr_wt.0.01_peak_321
chr1	55363461	55363753	cr_wt.0.01_peak_322
chr1	55405357	55406350	cr_wt.0.01_peak_323
chr1	55438515	55438767	cr_wt.0.01_peak_324
chr1	55489516	55489810	cr_wt.0.01_peak_325
chr1	55499591	55500024	cr_wt.0.01_peak_326
chr1	55874538	55874764	cr_wt.0.01_peak_327
chr1	55886367	55887748	cr_wt.0.01_peak_328
chr1	55888384	55888731	cr_wt.0.01_peak_329
chr1	55899709	55900536	cr_wt.0.01_peak_330
chr1	55960020	55960847	cr_wt.0.01_peak_331
chr1	56239683	56240220	cr_wt.0.01_peak_332
chr1	56244905	56245187	cr_wt.0.01_peak_333
chr1	56252237	56252515	cr_wt.0.01_peak_334
chr1	56256949	56257729	cr_wt.0.01_peak_335
chr1	56344414	56345514	cr_wt.0.01_peak_336
chr1	56395399	56396534	cr_wt.0.01_peak_337
chr1	56402970	56404130	cr_wt.0.01_peak_338
chr1	56641316	56641540	cr_wt.0.01_peak_339
chr1	56834205	56835305	cr_wt.0.01_peak_340
chr1	56899919	56900231	cr_wt.0.01_peak_341
chr1	56900491	56900683	cr_wt.0.01_peak_342
chr1	56908679	56909129	cr_wt.0.01_peak_343
chr1	56928301	56929374	cr_wt.0.01_peak_344
chr1	56963604	56964277	cr_wt.0.01_peak_345
chr1	56965727	56966828	cr_wt.0.01_peak_346
chr1	56968095	56968371	cr_wt.0.01_peak_347
chr1	56969000	56970430	cr_wt.0.01_peak_348
chr1	56970814	56974006	cr_wt.0.01_peak_349
chr1	56974802	56975024	cr_wt.0.01_peak_350
chr1	56976814	56977185	cr_wt.0.01_peak_351
chr1	57040010	57040820	cr_wt.0.01_peak_352
chr1	57041148	57041504	cr_wt.0.01_peak_353
chr1	57144428	57144616	cr_wt.0.01_peak_354
chr1	57205603	57206324	cr_wt.0.01_peak_355
chr1	57208154	57208380	cr_wt.0.01_peak_356
chr1	57208719	57209349	cr_wt.0.01_peak_357
chr1	57210780	57211094	cr_wt.0.01_peak_358
chr1	57213311	57213592	cr_wt.0.01_peak_359
chr1	57224424	57225023	cr_wt.0.01_peak_360
chr1	57264899	57265973	cr_wt.0.01_peak_361
chr1	57328885	57331000	cr_wt.0.01_peak_362
chr1	57331453	57331634	cr_wt.0.01_peak_363
chr1	57377300	57377926	cr_wt.0.01_peak_364
chr1	57388123	57388728	cr_wt.0.01_peak_365
chr1	57389228	57389836	cr_wt.0.01_peak_366
chr1	57406509	57406941	cr_wt.0.01_peak_367
chr1	57428653	57429709	cr_wt.0.01_peak_368
chr1	57478620	57479374	cr_wt.0.01_peak_369
chr1	57511105	57511302	cr_wt.0.01_peak_370
chr1	57875433	57875726	cr_wt.0.01_peak_371
chr1	57969763	57970014	cr_wt.0.01_peak_372
chr1	58291867	58292121	cr_wt.0.01_peak_373
chr1	58392825	58393271	cr_wt.0.01_peak_374
chr1	58422750	58424471	cr_wt.0.01_peak_375
chr1	58445230	58445472	cr_wt.0.01_peak_376
chr1	58504769	58505349	cr_wt.0.01_peak_377
chr1	58586356	58586627	cr_wt.0.01_peak_378
chr1	58972954	58974096	cr_wt.0.01_peak_379
chr1	59119842	59120577	cr_wt.0.01_peak_380
chr1	59236729	59238019	cr_wt.0.01_peak_381
chr1	59481653	59482900	cr_wt.0.01_peak_382
chr1	59516168	59517062	cr_wt.0.01_peak_383
chr1	59535187	59535724	cr_wt.0.01_peak_384
chr1	59574644	59575028	cr_wt.0.01_peak_385
chr1	59602722	59603367	cr_wt.0.01_peak_386
chr1	59684471	59684786	cr_wt.0.01_peak_387
chr1	59684974	59685493	cr_wt.0.01_peak_388
chr1	59762231	59763788	cr_wt.0.01_peak_389
chr1	59763990	59764206	cr_wt.0.01_peak_390
chr1	59912225	59913746	cr_wt.0.01_peak_391
chr1	60034994	60035158	cr_wt.0.01_peak_392
chr1	60035326	60035841	cr_wt.0.01_peak_393
chr1	60097432	60098767	cr_wt.0.01_peak_394
chr1	60179988	60180567	cr_wt.0.01_peak_395
chr1	60180852	60181018	cr_wt.0.01_peak_396
chr1	60342853	60343712	cr_wt.0.01_peak_397
chr1	60409076	60410091	cr_wt.0.01_peak_398
chr1	60565807	60567574	cr_wt.0.01_peak_399
chr1	60853169	60853332	cr_wt.0.01_peak_400
chr1	61181314	61181675	cr_wt.0.01_peak_401
chr1	61198782	61199198	cr_wt.0.01_peak_402
chr1	61273995	61274738	cr_wt.0.01_peak_403
chr1	61428903	61429205	cr_wt.0.01_peak_404
chr1	61437820	61438001	cr_wt.0.01_peak_405
chr1	61796593	61796887	cr_wt.0.01_peak_406
chr1	61820401	61820569	cr_wt.0.01_peak_407
chr1	61841561	61841790	cr_wt.0.01_peak_408
chr1	61913207	61913498	cr_wt.0.01_peak_409
chr1	62053174	62053382	cr_wt.0.01_peak_410
chr1	62215870	62217044	cr_wt.0.01_peak_411
chr1	62268973	62269238	cr_wt.0.01_peak_412
chr1	62448962	62449979	cr_wt.0.01_peak_413
chr1	62576989	62577687	cr_wt.0.01_peak_414
chr1	62702841	62703930	cr_wt.0.01_peak_415
chr1	62706395	62706682	cr_wt.0.01_peak_416
chr1	62707211	62707836	cr_wt.0.01_peak_417
chr1	63113246	63113644	cr_wt.0.01_peak_418
chr1	63113841	63115094	cr_wt.0.01_peak_419
chr1	63176626	63177386	cr_wt.0.01_peak_420
chr1	63445600	63445805	cr_wt.0.01_peak_421
chr1	63730360	63731079	cr_wt.0.01_peak_422
chr1	63763369	63763808	cr_wt.0.01_peak_423
chr1	63769864	63770318	cr_wt.0.01_peak_424
chr1	63770782	63771067	cr_wt.0.01_peak_425
chr1	64117534	64117736	cr_wt.0.01_peak_426
chr1	64118882	64119679	cr_wt.0.01_peak_427
chr1	64120105	64120695	cr_wt.0.01_peak_428
chr1	64121066	64122802	cr_wt.0.01_peak_429
chr1	64191499	64191960	cr_wt.0.01_peak_430
chr1	64212939	64213101	cr_wt.0.01_peak_431
chr1	64532277	64533070	cr_wt.0.01_peak_432
chr1	64616602	64617874	cr_wt.0.01_peak_433
chr1	64690373	64691268	cr_wt.0.01_peak_434
chr1	65178223	65180111	cr_wt.0.01_peak_435
chr1	65186068	65187227	cr_wt.0.01_peak_436
chr1	66174739	66176794	cr_wt.0.01_peak_437
chr1	66292340	66293184	cr_wt.0.01_peak_438
chr1	66321281	66322294	cr_wt.0.01_peak_439
chr1	66322644	66323150	cr_wt.0.01_peak_440
chr1	66323358	66323977	cr_wt.0.01_peak_441
chr1	66324587	66324785	cr_wt.0.01_peak_442
chr1	66386923	66387626	cr_wt.0.01_peak_443
chr1	66394804	66395533	cr_wt.0.01_peak_444
chr1	66395796	66396035	cr_wt.0.01_peak_445
chr1	66700287	66701412	cr_wt.0.01_peak_446
chr1	66816410	66818276	cr_wt.0.01_peak_447
chr1	66895911	66896637	cr_wt.0.01_peak_448
chr1	67038488	67039365	cr_wt.0.01_peak_449
chr1	68305843	68306408	cr_wt.0.01_peak_450
chr1	68886800	68887047	cr_wt.0.01_peak_451
chr1	69687060	69687939	cr_wt.0.01_peak_452
chr1	69790547	69790724	cr_wt.0.01_peak_453
chr1	70725799	70726077	cr_wt.0.01_peak_454
chr1	70803300	70803586	cr_wt.0.01_peak_455
chr1	70856208	70856485	cr_wt.0.01_peak_456
chr1	71026063	71026553	cr_wt.0.01_peak_457
chr1	71026745	71026945	cr_wt.0.01_peak_458
chr1	71102138	71103383	cr_wt.0.01_peak_459
chr1	71418278	71418507	cr_wt.0.01_peak_460
chr1	71556908	71557364	cr_wt.0.01_peak_461
chr1	71652653	71654279	cr_wt.0.01_peak_462
chr1	71788331	71788923	cr_wt.0.01_peak_463
chr1	71909516	71910035	cr_wt.0.01_peak_464
chr1	72226451	72226666	cr_wt.0.01_peak_465
chr1	72243421	72244477	cr_wt.0.01_peak_466
chr1	72254257	72255501	cr_wt.0.01_peak_467
chr1	72283846	72284808	cr_wt.0.01_peak_468
chr1	72306721	72307828	cr_wt.0.01_peak_469
chr1	72372679	72373062	cr_wt.0.01_peak_470
chr1	72532716	72533612	cr_wt.0.01_peak_471
chr1	72537126	72537505	cr_wt.0.01_peak_472
chr1	72582969	72583860	cr_wt.0.01_peak_473
chr1	72710714	72711663	cr_wt.0.01_peak_474
chr1	72823934	72825333	cr_wt.0.01_peak_475
chr1	72870840	72872473	cr_wt.0.01_peak_476
chr1	72873686	72873994	cr_wt.0.01_peak_477
chr1	72874921	72875271	cr_wt.0.01_peak_478
chr1	73901930	73902346	cr_wt.0.01_peak_479
chr1	74235989	74237081	cr_wt.0.01_peak_480
chr1	74284308	74285291	cr_wt.0.01_peak_481
chr1	74332234	74333099	cr_wt.0.01_peak_482
chr1	74386699	74387266	cr_wt.0.01_peak_483
chr1	74391322	74391713	cr_wt.0.01_peak_484
chr1	74505421	74506459	cr_wt.0.01_peak_485
chr1	74587530	74588551	cr_wt.0.01_peak_486
chr1	74601087	74601900	cr_wt.0.01_peak_487
chr1	74661245	74662200	cr_wt.0.01_peak_488
chr1	74662367	74662941	cr_wt.0.01_peak_489
chr1	74816764	74817666	cr_wt.0.01_peak_490
chr1	74854836	74855303	cr_wt.0.01_peak_491
chr1	75124731	75125225	cr_wt.0.01_peak_492
chr1	75142013	75143199	cr_wt.0.01_peak_493
chr1	75168637	75169034	cr_wt.0.01_peak_494
chr1	75191545	75191995	cr_wt.0.01_peak_495
chr1	75192318	75192514	cr_wt.0.01_peak_496
chr1	75210494	75210920	cr_wt.0.01_peak_497
chr1	75211368	75211632	cr_wt.0.01_peak_498
chr1	75218599	75219418	cr_wt.0.01_peak_499
chr1	75236469	75236922	cr_wt.0.01_peak_500
chr1	75251623	75251900	cr_wt.0.01_peak_501
chr1	75316717	75318296	cr_wt.0.01_peak_502
chr1	75521562	75522040	cr_wt.0.01_peak_503
chr1	75546739	75547290	cr_wt.0.01_peak_504
chr1	75652756	75652945	cr_wt.0.01_peak_505
chr1	75653169	75654220	cr_wt.0.01_peak_506
chr1	75692861	75693300	cr_wt.0.01_peak_507
chr1	75978558	75978991	cr_wt.0.01_peak_508
chr1	76489676	76489843	cr_wt.0.01_peak_509
chr1	76490131	76490435	cr_wt.0.01_peak_510
chr1	76654885	76655124	cr_wt.0.01_peak_511
chr1	76717882	76718159	cr_wt.0.01_peak_512
chr1	77102605	77102913	cr_wt.0.01_peak_513
chr1	77346632	77346909	cr_wt.0.01_peak_514
chr1	77384421	77384621	cr_wt.0.01_peak_515
chr1	77409764	77410161	cr_wt.0.01_peak_516
chr1	77427262	77427628	cr_wt.0.01_peak_517
chr1	77431851	77432130	cr_wt.0.01_peak_518
chr1	77497163	77497485	cr_wt.0.01_peak_519
chr1	77505687	77505921	cr_wt.0.01_peak_520
chr1	77506085	77506588	cr_wt.0.01_peak_521
chr1	77511979	77512187	cr_wt.0.01_peak_522
chr1	77512425	77513017	cr_wt.0.01_peak_523
chr1	77513259	77513637	cr_wt.0.01_peak_524
chr1	77514300	77515654	cr_wt.0.01_peak_525
chr1	77515824	77516787	cr_wt.0.01_peak_526
chr1	78488743	78489368	cr_wt.0.01_peak_527
chr1	78657538	78658450	cr_wt.0.01_peak_528
chr1	78819401	78820095	cr_wt.0.01_peak_529
chr1	79212680	79213521	cr_wt.0.01_peak_530
chr1	79439946	79440768	cr_wt.0.01_peak_531
chr1	79450484	79450826	cr_wt.0.01_peak_532
chr1	79581204	79581591	cr_wt.0.01_peak_533
chr1	79761598	79762118	cr_wt.0.01_peak_534
chr1	79775716	79776179	cr_wt.0.01_peak_535
chr1	79858842	79859048	cr_wt.0.01_peak_536
chr1	80340311	80341480	cr_wt.0.01_peak_537
chr1	81077311	81077576	cr_wt.0.01_peak_538
chr1	81522669	81522836	cr_wt.0.01_peak_539
chr1	81593391	81593569	cr_wt.0.01_peak_540
chr1	81593740	81594056	cr_wt.0.01_peak_541
chr1	81850987	81851167	cr_wt.0.01_peak_542
chr1	82260997	82261341	cr_wt.0.01_peak_543
chr1	82261512	82261755	cr_wt.0.01_peak_544
chr1	82282910	82284295	cr_wt.0.01_peak_545
chr1	82286698	82286895	cr_wt.0.01_peak_546
chr1	82290241	82291104	cr_wt.0.01_peak_547
chr1	82291278	82291942	cr_wt.0.01_peak_548
chr1	82292108	82292361	cr_wt.0.01_peak_549
chr1	82294076	82294483	cr_wt.0.01_peak_550
chr1	82312351	82312528	cr_wt.0.01_peak_551
chr1	82316054	82317086	cr_wt.0.01_peak_552
chr1	82320093	82321519	cr_wt.0.01_peak_553
chr1	82385968	82386184	cr_wt.0.01_peak_554
chr1	82437559	82437753	cr_wt.0.01_peak_555
chr1	82724480	82725387	cr_wt.0.01_peak_556
chr1	82787571	82788884	cr_wt.0.01_peak_557
chr1	82790857	82791049	cr_wt.0.01_peak_558
chr1	82839073	82839891	cr_wt.0.01_peak_559
chr1	83076070	83076558	cr_wt.0.01_peak_560
chr1	83269736	83270004	cr_wt.0.01_peak_561
chr1	83478810	83479251	cr_wt.0.01_peak_562
chr1	83745662	83746062	cr_wt.0.01_peak_563
chr1	83746275	83746458	cr_wt.0.01_peak_564
chr1	83748856	83749072	cr_wt.0.01_peak_565
chr1	84522730	84523172	cr_wt.0.01_peak_566
chr1	84695273	84695825	cr_wt.0.01_peak_567
chr1	84697228	84697463	cr_wt.0.01_peak_568
chr1	84709936	84710684	cr_wt.0.01_peak_569
chr1	84711244	84711422	cr_wt.0.01_peak_570
chr1	84838298	84840733	cr_wt.0.01_peak_571
chr1	85894502	85895369	cr_wt.0.01_peak_572
chr1	85928498	85928713	cr_wt.0.01_peak_573
chr1	86064418	86064953	cr_wt.0.01_peak_574
chr1	86358626	86360319	cr_wt.0.01_peak_575
chr1	86434032	86434492	cr_wt.0.01_peak_576
chr1	86440368	86440613	cr_wt.0.01_peak_577
chr1	86441153	86443318	cr_wt.0.01_peak_578
chr1	86487082	86488276	cr_wt.0.01_peak_579
chr1	86500863	86502036	cr_wt.0.01_peak_580
chr1	86502547	86502842	cr_wt.0.01_peak_581
chr1	86503887	86504421	cr_wt.0.01_peak_582
chr1	86505903	86506203	cr_wt.0.01_peak_583
chr1	86506376	86507074	cr_wt.0.01_peak_584
chr1	86524053	86524260	cr_wt.0.01_peak_585
chr1	86524823	86528991	cr_wt.0.01_peak_586
chr1	86581872	86582953	cr_wt.0.01_peak_587
chr1	86669894	86670168	cr_wt.0.01_peak_588
chr1	87213844	87214422	cr_wt.0.01_peak_589
chr1	87299394	87299716	cr_wt.0.01_peak_590
chr1	87326897	87327252	cr_wt.0.01_peak_591
chr1	87510291	87510474	cr_wt.0.01_peak_592
chr1	87853304	87853631	cr_wt.0.01_peak_593
chr1	87879724	87880021	cr_wt.0.01_peak_594
chr1	88008474	88008955	cr_wt.0.01_peak_595
chr1	88211515	88212007	cr_wt.0.01_peak_596
chr1	88213795	88214208	cr_wt.0.01_peak_598
chr1	88220926	88221335	cr_wt.0.01_peak_599
chr1	88222098	88222538	cr_wt.0.01_peak_600
chr1	88223898	88224366	cr_wt.0.01_peak_601
chr1	88227526	88228317	cr_wt.0.01_peak_602
chr1	88229684	88229854	cr_wt.0.01_peak_603
chr1	88231858	88232614	cr_wt.0.01_peak_604
chr1	88233458	88233831	cr_wt.0.01_peak_605
chr1	88240030	88240722	cr_wt.0.01_peak_607
chr1	88242803	88243208	cr_wt.0.01_peak_608
chr1	88245327	88245977	cr_wt.0.01_peak_609
chr1	88248334	88248671	cr_wt.0.01_peak_610
chr1	88248849	88249034	cr_wt.0.01_peak_611
chr1	88252157	88252760	cr_wt.0.01_peak_612
chr1	88253399	88253700	cr_wt.0.01_peak_613
chr1	88254333	88255773	cr_wt.0.01_peak_614
chr1	88256183	88256826	cr_wt.0.01_peak_615
chr1	88257082	88257254	cr_wt.0.01_peak_616
chr1	88257455	88258151	cr_wt.0.01_peak_617
chr1	88258441	88258723	cr_wt.0.01_peak_618
chr1	88259985	88260624	cr_wt.0.01_peak_619
chr1	88261086	88261253	cr_wt.0.01_peak_620
chr1	88261922	88262312	cr_wt.0.01_peak_621
chr1	88264011	88264512	cr_wt.0.01_peak_622
chr1	88267266	88268457	cr_wt.0.01_peak_623
chr1	88274147	88274717	cr_wt.0.01_peak_625
chr1	88276046	88278545	cr_wt.0.01_peak_626
chr1	88281909	88282074	cr_wt.0.01_peak_627
chr1	88287951	88288163	cr_wt.0.01_peak_629
chr1	88291715	88292211	cr_wt.0.01_peak_630
chr1	88295502	88295725	cr_wt.0.01_peak_631
chr1	88298731	88298944	cr_wt.0.01_peak_632
chr1	88299208	88299406	cr_wt.0.01_peak_633
chr1	88299638	88299970	cr_wt.0.01_peak_634
chr1	88301074	88301281	cr_wt.0.01_peak_635
chr1	88302442	88303045	cr_wt.0.01_peak_636
chr1	88304555	88305161	cr_wt.0.01_peak_637
chr1	88307280	88307486	cr_wt.0.01_peak_638
chr1	88309805	88310063	cr_wt.0.01_peak_639
chr1	88699168	88699450	cr_wt.0.01_peak_640
chr1	88700120	88700434	cr_wt.0.01_peak_641
chr1	88701533	88702513	cr_wt.0.01_peak_642
chr1	88705421	88705722	cr_wt.0.01_peak_643
chr1	88816513	88816809	cr_wt.0.01_peak_644
chr1	89035011	89035303	cr_wt.0.01_peak_645
chr1	89069785	89071272	cr_wt.0.01_peak_646
chr1	89092415	89092672	cr_wt.0.01_peak_647
chr1	89184255	89184814	cr_wt.0.01_peak_648
chr1	89185007	89185186	cr_wt.0.01_peak_649
chr1	89454408	89455264	cr_wt.0.01_peak_650
chr1	89550088	89550658	cr_wt.0.01_peak_651
chr1	89576762	89577281	cr_wt.0.01_peak_652
chr1	89751170	89751406	cr_wt.0.01_peak_653
chr1	89849066	89849583	cr_wt.0.01_peak_654
chr1	89942114	89942352	cr_wt.0.01_peak_655
chr1	90203997	90204279	cr_wt.0.01_peak_656
chr1	90221991	90222400	cr_wt.0.01_peak_657
chr1	90279306	90279741	cr_wt.0.01_peak_658
chr1	90317906	90318301	cr_wt.0.01_peak_659
chr1	90326923	90327681	cr_wt.0.01_peak_660
chr1	90602808	90603396	cr_wt.0.01_peak_661
chr1	91053124	91053324	cr_wt.0.01_peak_662
chr1	91209492	91209709	cr_wt.0.01_peak_663
chr1	91249916	91250776	cr_wt.0.01_peak_664
chr1	91297900	91298466	cr_wt.0.01_peak_665
chr1	91398581	91399167	cr_wt.0.01_peak_666
chr1	91412666	91414387	cr_wt.0.01_peak_667
chr1	91459016	91459883	cr_wt.0.01_peak_668
chr1	91759977	91760194	cr_wt.0.01_peak_669
chr1	92038824	92039213	cr_wt.0.01_peak_670
chr1	92473571	92474230	cr_wt.0.01_peak_672
chr1	92730484	92730813	cr_wt.0.01_peak_673
chr1	92737959	92738429	cr_wt.0.01_peak_674
chr1	92791205	92791515	cr_wt.0.01_peak_675
chr1	92831408	92832133	cr_wt.0.01_peak_676
chr1	92832521	92832934	cr_wt.0.01_peak_677
chr1	92900084	92900245	cr_wt.0.01_peak_678
chr1	92903942	92904339	cr_wt.0.01_peak_679
chr1	92907066	92907551	cr_wt.0.01_peak_680
chr1	92909084	92909321	cr_wt.0.01_peak_681
chr1	92934025	92935145	cr_wt.0.01_peak_682
chr1	93063658	93063872	cr_wt.0.01_peak_683
chr1	93101183	93101707	cr_wt.0.01_peak_684
chr1	93102169	93102588	cr_wt.0.01_peak_685
chr1	93342801	93343618	cr_wt.0.01_peak_686
chr1	93445330	93445678	cr_wt.0.01_peak_687
chr1	93478063	93479985	cr_wt.0.01_peak_688
chr1	93512043	93512273	cr_wt.0.01_peak_689
chr1	93635494	93636441	cr_wt.0.01_peak_690
chr1	93686328	93686653	cr_wt.0.01_peak_691
chr1	93801646	93801934	cr_wt.0.01_peak_692
chr1	93802153	93802368	cr_wt.0.01_peak_693
chr1	93803557	93804928	cr_wt.0.01_peak_694
chr1	93825081	93825737	cr_wt.0.01_peak_695
chr1	93825910	93826106	cr_wt.0.01_peak_696
chr1	93826594	93826755	cr_wt.0.01_peak_697
chr1	94263369	94263558	cr_wt.0.01_peak_698
chr1	94502430	94502621	cr_wt.0.01_peak_699
chr1	94503646	94504501	cr_wt.0.01_peak_700
chr1	95218857	95219392	cr_wt.0.01_peak_701
chr1	95223146	95223760	cr_wt.0.01_peak_702
chr1	95313213	95313748	cr_wt.0.01_peak_703
chr1	95314431	95314794	cr_wt.0.01_peak_704
chr1	95664225	95664447	cr_wt.0.01_peak_705
chr1	95665751	95666296	cr_wt.0.01_peak_706
chr1	95666668	95668163	cr_wt.0.01_peak_707
chr1	97660787	97661106	cr_wt.0.01_peak_708
chr1	97661324	97662510	cr_wt.0.01_peak_709
chr1	97769523	97770734	cr_wt.0.01_peak_710
chr1	97809518	97809937	cr_wt.0.01_peak_711
chr1	97834068	97834325	cr_wt.0.01_peak_712
chr1	97848733	97848996	cr_wt.0.01_peak_713
chr1	97863141	97863762	cr_wt.0.01_peak_714
chr1	97943962	97944351	cr_wt.0.01_peak_715
chr1	97976995	97977585	cr_wt.0.01_peak_716
chr1	98002661	98003610	cr_wt.0.01_peak_717
chr1	98095204	98095606	cr_wt.0.01_peak_718
chr1	98189821	98191253	cr_wt.0.01_peak_719
chr1	98668157	98668404	cr_wt.0.01_peak_720
chr1	101273382	101273674	cr_wt.0.01_peak_721
chr1	105068107	105068373	cr_wt.0.01_peak_722
chr1	105355979	105356180	cr_wt.0.01_peak_723
chr1	105420333	105420797	cr_wt.0.01_peak_724
chr1	105663144	105664288	cr_wt.0.01_peak_725
chr1	105989681	105990844	cr_wt.0.01_peak_726
chr1	105993769	105994239	cr_wt.0.01_peak_727
chr1	106071482	106072005	cr_wt.0.01_peak_728
chr1	106155123	106155353	cr_wt.0.01_peak_729
chr1	106170742	106171860	cr_wt.0.01_peak_730
chr1	106690731	106691443	cr_wt.0.01_peak_731
chr1	106702850	106703419	cr_wt.0.01_peak_732
chr1	106713725	106714514	cr_wt.0.01_peak_733
chr1	106759547	106759711	cr_wt.0.01_peak_734
chr1	106759987	106760354	cr_wt.0.01_peak_735
chr1	106796447	106797052	cr_wt.0.01_peak_736
chr1	107589746	107590012	cr_wt.0.01_peak_737
chr1	107636157	107636531	cr_wt.0.01_peak_738
chr1	107898435	107899832	cr_wt.0.01_peak_739
chr1	107902013	107902456	cr_wt.0.01_peak_740
chr1	108576645	108577105	cr_wt.0.01_peak_741
chr1	109471623	109471869	cr_wt.0.01_peak_742
chr1	109512340	109513275	cr_wt.0.01_peak_743
chr1	109932499	109933195	cr_wt.0.01_peak_744
chr1	109982504	109983136	cr_wt.0.01_peak_745
chr1	109983375	109983543	cr_wt.0.01_peak_746
chr1	109985572	109985742	cr_wt.0.01_peak_747
chr1	109985943	109986172	cr_wt.0.01_peak_748
chr1	110066371	110066678	cr_wt.0.01_peak_749
chr1	110067387	110067940	cr_wt.0.01_peak_750
chr1	110606069	110606288	cr_wt.0.01_peak_751
chr1	111833670	111833966	cr_wt.0.01_peak_752
chr1	111863939	111865412	cr_wt.0.01_peak_753
chr1	114862764	114862939	cr_wt.0.01_peak_754
chr1	118310981	118311653	cr_wt.0.01_peak_755
chr1	118321500	118322225	cr_wt.0.01_peak_756
chr1	118388231	118390146	cr_wt.0.01_peak_757
chr1	118435066	118435686	cr_wt.0.01_peak_758
chr1	118459304	118459493	cr_wt.0.01_peak_759
chr1	118481076	118481506	cr_wt.0.01_peak_760
chr1	118825346	118825754	cr_wt.0.01_peak_761
chr1	118982909	118983080	cr_wt.0.01_peak_762
chr1	119047613	119047782	cr_wt.0.01_peak_763
chr1	119053275	119054405	cr_wt.0.01_peak_764
chr1	119161987	119162246	cr_wt.0.01_peak_765
chr1	119330328	119330693	cr_wt.0.01_peak_766
chr1	119388701	119388893	cr_wt.0.01_peak_767
chr1	119504245	119505164	cr_wt.0.01_peak_768
chr1	119836933	119838298	cr_wt.0.01_peak_769
chr1	119884362	119885016	cr_wt.0.01_peak_770
chr1	119899338	119900411	cr_wt.0.01_peak_771
chr1	119902783	119903021	cr_wt.0.01_peak_772
chr1	119912991	119913198	cr_wt.0.01_peak_773
chr1	120120623	120121703	cr_wt.0.01_peak_774
chr1	121327740	121328255	cr_wt.0.01_peak_775
chr1	121399363	121400334	cr_wt.0.01_peak_776
chr1	121430758	121431561	cr_wt.0.01_peak_777
chr1	121567444	121568418	cr_wt.0.01_peak_778
chr1	122212215	122212532	cr_wt.0.01_peak_779
chr1	122464199	122464595	cr_wt.0.01_peak_780
chr1	125435462	125436115	cr_wt.0.01_peak_781
chr1	125560256	125561056	cr_wt.0.01_peak_782
chr1	125760231	125760742	cr_wt.0.01_peak_783
chr1	125910721	125910891	cr_wt.0.01_peak_784
chr1	125911333	125911515	cr_wt.0.01_peak_785
chr1	125988130	125988461	cr_wt.0.01_peak_786
chr1	126153677	126154446	cr_wt.0.01_peak_787
chr1	126218860	126219143	cr_wt.0.01_peak_788
chr1	126454776	126455409	cr_wt.0.01_peak_789
chr1	126469640	126470991	cr_wt.0.01_peak_790
chr1	126492284	126492933	cr_wt.0.01_peak_791
chr1	126683629	126684435	cr_wt.0.01_peak_792
chr1	126685904	126686103	cr_wt.0.01_peak_793
chr1	126687008	126687555	cr_wt.0.01_peak_794
chr1	126737868	126738227	cr_wt.0.01_peak_795
chr1	127204655	127205378	cr_wt.0.01_peak_796
chr1	127206121	127206588	cr_wt.0.01_peak_797
chr1	127208392	127208605	cr_wt.0.01_peak_798
chr1	127667421	127667591	cr_wt.0.01_peak_799
chr1	127773505	127774827	cr_wt.0.01_peak_800
chr1	127868526	127869219	cr_wt.0.01_peak_801
chr1	128102229	128103928	cr_wt.0.01_peak_802
chr1	128243818	128244586	cr_wt.0.01_peak_803
chr1	128359043	128360042	cr_wt.0.01_peak_804
chr1	128416705	128417414	cr_wt.0.01_peak_805
chr1	128466964	128467197	cr_wt.0.01_peak_806
chr1	128591802	128592086	cr_wt.0.01_peak_807
chr1	128592299	128592888	cr_wt.0.01_peak_808
chr1	128593124	128593461	cr_wt.0.01_peak_809
chr1	128595004	128595230	cr_wt.0.01_peak_810
chr1	129644102	129644266	cr_wt.0.01_peak_811
chr1	130066792	130067021	cr_wt.0.01_peak_812
chr1	130715499	130716486	cr_wt.0.01_peak_813
chr1	130716941	130717950	cr_wt.0.01_peak_814
chr1	131116275	131116563	cr_wt.0.01_peak_815
chr1	131137944	131138522	cr_wt.0.01_peak_816
chr1	131153060	131153435	cr_wt.0.01_peak_817
chr1	131293568	131293920	cr_wt.0.01_peak_818
chr1	131351361	131352364	cr_wt.0.01_peak_819
chr1	131460979	131461342	cr_wt.0.01_peak_820
chr1	131525775	131528512	cr_wt.0.01_peak_821
chr1	131554997	131555432	cr_wt.0.01_peak_822
chr1	131770563	131771237	cr_wt.0.01_peak_823
chr1	131821431	131821598	cr_wt.0.01_peak_824
chr1	131827590	131828694	cr_wt.0.01_peak_825
chr1	131867180	131867504	cr_wt.0.01_peak_826
chr1	131910086	131911136	cr_wt.0.01_peak_827
chr1	132007043	132008305	cr_wt.0.01_peak_828
chr1	132088289	132088527	cr_wt.0.01_peak_829
chr1	132157467	132157776	cr_wt.0.01_peak_830
chr1	132190226	132191205	cr_wt.0.01_peak_831
chr1	132191422	132191703	cr_wt.0.01_peak_832
chr1	132191891	132192495	cr_wt.0.01_peak_833
chr1	132200312	132201051	cr_wt.0.01_peak_834
chr1	132201784	132202041	cr_wt.0.01_peak_835
chr1	132391812	132391978	cr_wt.0.01_peak_836
chr1	132477010	132477378	cr_wt.0.01_peak_837
chr1	132557430	132558702	cr_wt.0.01_peak_838
chr1	132591581	132592227	cr_wt.0.01_peak_839
chr1	132659404	132659623	cr_wt.0.01_peak_840
chr1	132741185	132741348	cr_wt.0.01_peak_841
chr1	132742264	132742473	cr_wt.0.01_peak_842
chr1	132758877	132759088	cr_wt.0.01_peak_843
chr1	133033465	133033827	cr_wt.0.01_peak_844
chr1	133039471	133039712	cr_wt.0.01_peak_845
chr1	133045488	133046411	cr_wt.0.01_peak_846
chr1	133130715	133131720	cr_wt.0.01_peak_847
chr1	133188205	133188493	cr_wt.0.01_peak_848
chr1	133353382	133353763	cr_wt.0.01_peak_849
chr1	133423840	133424092	cr_wt.0.01_peak_850
chr1	133492568	133493102	cr_wt.0.01_peak_851
chr1	133609990	133610403	cr_wt.0.01_peak_852
chr1	133660871	133661955	cr_wt.0.01_peak_853
chr1	133800740	133800982	cr_wt.0.01_peak_854
chr1	133842793	133843069	cr_wt.0.01_peak_855
chr1	133907888	133908721	cr_wt.0.01_peak_856
chr1	134060604	134061973	cr_wt.0.01_peak_857
chr1	134062845	134063143	cr_wt.0.01_peak_858
chr1	134078251	134079632	cr_wt.0.01_peak_859
chr1	134093064	134093358	cr_wt.0.01_peak_860
chr1	134099172	134099367	cr_wt.0.01_peak_861
chr1	134405708	134406282	cr_wt.0.01_peak_862
chr1	134415025	134415694	cr_wt.0.01_peak_863
chr1	134455259	134455643	cr_wt.0.01_peak_864
chr1	134494633	134495106	cr_wt.0.01_peak_865
chr1	134556608	134557247	cr_wt.0.01_peak_866
chr1	134560229	134560473	cr_wt.0.01_peak_867
chr1	134955266	134956029	cr_wt.0.01_peak_868
chr1	134962157	134962475	cr_wt.0.01_peak_869
chr1	135147309	135147654	cr_wt.0.01_peak_870
chr1	135283691	135284134	cr_wt.0.01_peak_871
chr1	135368132	135368331	cr_wt.0.01_peak_872
chr1	135373275	135373841	cr_wt.0.01_peak_873
chr1	135375210	135375417	cr_wt.0.01_peak_874
chr1	135429842	135430011	cr_wt.0.01_peak_875
chr1	135572307	135572523	cr_wt.0.01_peak_876
chr1	135605036	135605226	cr_wt.0.01_peak_877
chr1	135642007	135642173	cr_wt.0.01_peak_878
chr1	135643635	135643865	cr_wt.0.01_peak_879
chr1	135670196	135670885	cr_wt.0.01_peak_880
chr1	135687910	135688076	cr_wt.0.01_peak_881
chr1	135700594	135700788	cr_wt.0.01_peak_882
chr1	135728780	135729083	cr_wt.0.01_peak_883
chr1	136018387	136018563	cr_wt.0.01_peak_884
chr1	136059918	136060099	cr_wt.0.01_peak_885
chr1	136103247	136103601	cr_wt.0.01_peak_886
chr1	136131046	136132069	cr_wt.0.01_peak_887
chr1	136132531	136133510	cr_wt.0.01_peak_888
chr1	136234084	136234631	cr_wt.0.01_peak_889
chr1	136260035	136260288	cr_wt.0.01_peak_890
chr1	136345529	136346410	cr_wt.0.01_peak_891
chr1	136414950	136415691	cr_wt.0.01_peak_892
chr1	136466406	136466656	cr_wt.0.01_peak_893
chr1	136624912	136625360	cr_wt.0.01_peak_894
chr1	137331864	137332446	cr_wt.0.01_peak_895
chr1	137332650	137332915	cr_wt.0.01_peak_896
chr1	137846759	137847769	cr_wt.0.01_peak_897
chr1	137897566	137897744	cr_wt.0.01_peak_898
chr1	137897920	137901475	cr_wt.0.01_peak_899
chr1	137927848	137928538	cr_wt.0.01_peak_900
chr1	138044240	138044688	cr_wt.0.01_peak_901
chr1	138136214	138136640	cr_wt.0.01_peak_902
chr1	138245473	138245651	cr_wt.0.01_peak_903
chr1	138289813	138290152	cr_wt.0.01_peak_904
chr1	138496997	138497328	cr_wt.0.01_peak_905
chr1	138499414	138499618	cr_wt.0.01_peak_906
chr1	138619182	138619987	cr_wt.0.01_peak_907
chr1	138835596	138835800	cr_wt.0.01_peak_908
chr1	138840409	138840787	cr_wt.0.01_peak_909
chr1	138841547	138841804	cr_wt.0.01_peak_910
chr1	138842163	138843421	cr_wt.0.01_peak_911
chr1	138856690	138856912	cr_wt.0.01_peak_912
chr1	138901693	138902356	cr_wt.0.01_peak_913
chr1	139079056	139079539	cr_wt.0.01_peak_914
chr1	139079857	139080756	cr_wt.0.01_peak_915
chr1	139156463	139156799	cr_wt.0.01_peak_916
chr1	139421692	139422106	cr_wt.0.01_peak_917
chr1	139422400	139422585	cr_wt.0.01_peak_918
chr1	139454426	139454994	cr_wt.0.01_peak_919
chr1	140245411	140245962	cr_wt.0.01_peak_920
chr1	140265372	140265536	cr_wt.0.01_peak_921
chr1	140456930	140457467	cr_wt.0.01_peak_922
chr1	140464452	140464761	cr_wt.0.01_peak_923
chr1	140468234	140468633	cr_wt.0.01_peak_924
chr1	140561060	140561260	cr_wt.0.01_peak_925
chr1	140660828	140661502	cr_wt.0.01_peak_926
chr1	141337967	141338195	cr_wt.0.01_peak_927
chr1	141776046	141776513	cr_wt.0.01_peak_928
chr1	141813393	141813582	cr_wt.0.01_peak_929
chr1	141813987	141814187	cr_wt.0.01_peak_930
chr1	142000020	142000212	cr_wt.0.01_peak_931
chr1	142055115	142055736	cr_wt.0.01_peak_932
chr1	143200350	143200673	cr_wt.0.01_peak_933
chr1	143640290	143641678	cr_wt.0.01_peak_934
chr1	143641936	143642122	cr_wt.0.01_peak_935
chr1	143642298	143642482	cr_wt.0.01_peak_936
chr1	143644007	143644808	cr_wt.0.01_peak_937
chr1	143702077	143703203	cr_wt.0.01_peak_938
chr1	143738860	143739198	cr_wt.0.01_peak_939
chr1	143739419	143740472	cr_wt.0.01_peak_940
chr1	143776470	143777431	cr_wt.0.01_peak_941
chr1	143904204	143904471	cr_wt.0.01_peak_942
chr1	144003633	144004619	cr_wt.0.01_peak_943
chr1	144431792	144432279	cr_wt.0.01_peak_944
chr1	144501962	144502496	cr_wt.0.01_peak_945
chr1	144544632	144544909	cr_wt.0.01_peak_946
chr1	144883554	144883722	cr_wt.0.01_peak_947
chr1	146657297	146658236	cr_wt.0.01_peak_948
chr1	146783558	146783837	cr_wt.0.01_peak_949
chr1	146850113	146850322	cr_wt.0.01_peak_950
chr1	147309146	147309337	cr_wt.0.01_peak_951
chr1	147343434	147344170	cr_wt.0.01_peak_952
chr1	147344420	147344921	cr_wt.0.01_peak_953
chr1	148664145	148664886	cr_wt.0.01_peak_954
chr1	148720893	148721062	cr_wt.0.01_peak_955
chr1	148721443	148721639	cr_wt.0.01_peak_956
chr1	149198935	149199744	cr_wt.0.01_peak_957
chr1	149238187	149238884	cr_wt.0.01_peak_958
chr1	149440679	149440977	cr_wt.0.01_peak_959
chr1	149449863	149450254	cr_wt.0.01_peak_960
chr1	149723445	149723860	cr_wt.0.01_peak_961
chr1	149758476	149758797	cr_wt.0.01_peak_962
chr1	149896797	149897061	cr_wt.0.01_peak_963
chr1	150392515	150393691	cr_wt.0.01_peak_964
chr1	150877793	150878896	cr_wt.0.01_peak_965
chr1	150913322	150914411	cr_wt.0.01_peak_966
chr1	150933451	150933695	cr_wt.0.01_peak_967
chr1	150934761	150935287	cr_wt.0.01_peak_968
chr1	151079217	151079527	cr_wt.0.01_peak_969
chr1	151158177	151159053	cr_wt.0.01_peak_970
chr1	151343694	151344666	cr_wt.0.01_peak_971
chr1	151345159	151346154	cr_wt.0.01_peak_972
chr1	151500051	151501392	cr_wt.0.01_peak_974
chr1	151754862	151755810	cr_wt.0.01_peak_975
chr1	152005146	152005416	cr_wt.0.01_peak_976
chr1	152085721	152085897	cr_wt.0.01_peak_977
chr1	152089485	152091180	cr_wt.0.01_peak_978
chr1	152165446	152165638	cr_wt.0.01_peak_979
chr1	152401244	152401464	cr_wt.0.01_peak_980
chr1	152410923	152411144	cr_wt.0.01_peak_981
chr1	152624607	152625429	cr_wt.0.01_peak_982
chr1	152640468	152640690	cr_wt.0.01_peak_983
chr1	152750504	152750867	cr_wt.0.01_peak_984
chr1	152765842	152767192	cr_wt.0.01_peak_985
chr1	152767859	152768292	cr_wt.0.01_peak_986
chr1	152815152	152815537	cr_wt.0.01_peak_987
chr1	152902814	152904450	cr_wt.0.01_peak_988
chr1	152954985	152955315	cr_wt.0.01_peak_989
chr1	152956381	152956737	cr_wt.0.01_peak_990
chr1	153180901	153181064	cr_wt.0.01_peak_991
chr1	153332125	153332342	cr_wt.0.01_peak_992
chr1	153332669	153333272	cr_wt.0.01_peak_993
chr1	153424784	153425316	cr_wt.0.01_peak_994
chr1	153486870	153487048	cr_wt.0.01_peak_995
chr1	153487217	153487946	cr_wt.0.01_peak_996
chr1	153549970	153550147	cr_wt.0.01_peak_997
chr1	153635459	153635936	cr_wt.0.01_peak_998
chr1	153641632	153642776	cr_wt.0.01_peak_999
chr1	153704413	153704712	cr_wt.0.01_peak_1000
chr1	153746429	153746744	cr_wt.0.01_peak_1001
chr1	153747563	153747838	cr_wt.0.01_peak_1002
chr1	153748177	153748632	cr_wt.0.01_peak_1003
chr1	153749442	153749800	cr_wt.0.01_peak_1004
chr1	153899384	153900462	cr_wt.0.01_peak_1005
chr1	153900689	153900881	cr_wt.0.01_peak_1006
chr1	154150455	154150659	cr_wt.0.01_peak_1007
chr1	154887944	154888991	cr_wt.0.01_peak_1008
chr1	155026031	155026292	cr_wt.0.01_peak_1009
chr1	155082861	155083417	cr_wt.0.01_peak_1010
chr1	155097911	155098197	cr_wt.0.01_peak_1011
chr1	155099389	155100039	cr_wt.0.01_peak_1012
chr1	155158207	155159324	cr_wt.0.01_peak_1013
chr1	155178224	155179096	cr_wt.0.01_peak_1014
chr1	155192491	155193923	cr_wt.0.01_peak_1015
chr1	155204217	155205390	cr_wt.0.01_peak_1016
chr1	155205766	155206359	cr_wt.0.01_peak_1017
chr1	155212562	155213167	cr_wt.0.01_peak_1018
chr1	155293371	155293801	cr_wt.0.01_peak_1019
chr1	155415586	155415919	cr_wt.0.01_peak_1020
chr1	155416672	155418196	cr_wt.0.01_peak_1021
chr1	155488444	155489944	cr_wt.0.01_peak_1022
chr1	155516207	155516377	cr_wt.0.01_peak_1023
chr1	155704709	155705076	cr_wt.0.01_peak_1024
chr1	155812849	155813264	cr_wt.0.01_peak_1025
chr1	155972800	155974007	cr_wt.0.01_peak_1026
chr1	156035492	156036821	cr_wt.0.01_peak_1027
chr1	156040110	156041306	cr_wt.0.01_peak_1028
chr1	156420639	156421367	cr_wt.0.01_peak_1029
chr1	156473864	156474430	cr_wt.0.01_peak_1030
chr1	156558480	156559491	cr_wt.0.01_peak_1031
chr1	156673995	156674365	cr_wt.0.01_peak_1032
chr1	156718848	156719575	cr_wt.0.01_peak_1033
chr1	156938413	156939611	cr_wt.0.01_peak_1034
chr1	156940036	156940504	cr_wt.0.01_peak_1035
chr1	156996863	156997219	cr_wt.0.01_peak_1036
chr1	156997479	156997648	cr_wt.0.01_peak_1037
chr1	157001076	157001706	cr_wt.0.01_peak_1038
chr1	157037100	157037598	cr_wt.0.01_peak_1039
chr1	157038110	157040563	cr_wt.0.01_peak_1040
chr1	157076861	157077141	cr_wt.0.01_peak_1041
chr1	157086365	157086681	cr_wt.0.01_peak_1042
chr1	157244560	157244743	cr_wt.0.01_peak_1043
chr1	157412348	157412630	cr_wt.0.01_peak_1044
chr1	157721623	157722184	cr_wt.0.01_peak_1045
chr1	157745874	157746923	cr_wt.0.01_peak_1046
chr1	157747129	157747295	cr_wt.0.01_peak_1047
chr1	157888391	157889311	cr_wt.0.01_peak_1048
chr1	157939344	157940973	cr_wt.0.01_peak_1049
chr1	158097854	158098031	cr_wt.0.01_peak_1050
chr1	158355766	158356637	cr_wt.0.01_peak_1051
chr1	158364377	158364682	cr_wt.0.01_peak_1052
chr1	158513546	158514328	cr_wt.0.01_peak_1053
chr1	158654154	158654903	cr_wt.0.01_peak_1054
chr1	159135234	159135435	cr_wt.0.01_peak_1055
chr1	159135619	159135805	cr_wt.0.01_peak_1056
chr1	159148433	159148602	cr_wt.0.01_peak_1057
chr1	159162924	159163652	cr_wt.0.01_peak_1058
chr1	159165635	159166191	cr_wt.0.01_peak_1059
chr1	159231823	159232231	cr_wt.0.01_peak_1060
chr1	159523457	159524136	cr_wt.0.01_peak_1061
chr1	159614815	159615613	cr_wt.0.01_peak_1062
chr1	160194693	160195153	cr_wt.0.01_peak_1063
chr1	160212232	160213758	cr_wt.0.01_peak_1064
chr1	160276641	160276942	cr_wt.0.01_peak_1065
chr1	160277948	160279233	cr_wt.0.01_peak_1066
chr1	160285522	160287761	cr_wt.0.01_peak_1067
chr1	160287982	160288183	cr_wt.0.01_peak_1068
chr1	160289115	160289347	cr_wt.0.01_peak_1069
chr1	160294690	160295228	cr_wt.0.01_peak_1070
chr1	160300565	160301555	cr_wt.0.01_peak_1071
chr1	160351959	160352511	cr_wt.0.01_peak_1072
chr1	160534384	160535220	cr_wt.0.01_peak_1073
chr1	160628404	160629040	cr_wt.0.01_peak_1074
chr1	160792791	160793249	cr_wt.0.01_peak_1075
chr1	160906025	160907618	cr_wt.0.01_peak_1076
chr1	161033799	161035778	cr_wt.0.01_peak_1077
chr1	161036310	161036877	cr_wt.0.01_peak_1078
chr1	161070364	161071139	cr_wt.0.01_peak_1079
chr1	161195413	161196248	cr_wt.0.01_peak_1080
chr1	161225118	161225575	cr_wt.0.01_peak_1081
chr1	161251142	161251499	cr_wt.0.01_peak_1082
chr1	161379900	161380251	cr_wt.0.01_peak_1083
chr1	161876212	161877724	cr_wt.0.01_peak_1084
chr1	161968939	161969797	cr_wt.0.01_peak_1085
chr1	162359276	162359460	cr_wt.0.01_peak_1086
chr1	162389467	162389648	cr_wt.0.01_peak_1087
chr1	162477426	162477748	cr_wt.0.01_peak_1088
chr1	162548129	162549092	cr_wt.0.01_peak_1089
chr1	162570171	162570701	cr_wt.0.01_peak_1090
chr1	162739884	162741232	cr_wt.0.01_peak_1091
chr1	163129734	163129938	cr_wt.0.01_peak_1092
chr1	163403420	163404334	cr_wt.0.01_peak_1093
chr1	163779324	163780040	cr_wt.0.01_peak_1094
chr1	163929666	163930030	cr_wt.0.01_peak_1095
chr1	163994742	163994913	cr_wt.0.01_peak_1096
chr1	164248454	164249583	cr_wt.0.01_peak_1097
chr1	164274977	164275951	cr_wt.0.01_peak_1098
chr1	164307074	164307953	cr_wt.0.01_peak_1099
chr1	164457222	164458938	cr_wt.0.01_peak_1100
chr1	164898872	164899436	cr_wt.0.01_peak_1101
chr1	165236519	165237395	cr_wt.0.01_peak_1102
chr1	165281284	165282907	cr_wt.0.01_peak_1103
chr1	165459890	165461761	cr_wt.0.01_peak_1104
chr1	165556929	165557101	cr_wt.0.01_peak_1105
chr1	165559018	165559196	cr_wt.0.01_peak_1106
chr1	165634291	165634916	cr_wt.0.01_peak_1107
chr1	165641673	165642318	cr_wt.0.01_peak_1108
chr1	165642652	165643292	cr_wt.0.01_peak_1109
chr1	165780774	165781095	cr_wt.0.01_peak_1110
chr1	165913791	165914083	cr_wt.0.01_peak_1111
chr1	165934736	165935683	cr_wt.0.01_peak_1112
chr1	166001279	166001527	cr_wt.0.01_peak_1113
chr1	166002318	166003564	cr_wt.0.01_peak_1114
chr1	166153720	166154132	cr_wt.0.01_peak_1115
chr1	166280631	166281210	cr_wt.0.01_peak_1116
chr1	166378522	166379140	cr_wt.0.01_peak_1117
chr1	166379606	166380135	cr_wt.0.01_peak_1118
chr1	166409203	166410129	cr_wt.0.01_peak_1119
chr1	166750080	166750878	cr_wt.0.01_peak_1120
chr1	166753252	166753514	cr_wt.0.01_peak_1121
chr1	167002383	167002808	cr_wt.0.01_peak_1122
chr1	167114421	167114901	cr_wt.0.01_peak_1123
chr1	167270490	167271008	cr_wt.0.01_peak_1124
chr1	167283483	167284436	cr_wt.0.01_peak_1125
chr1	167284942	167285239	cr_wt.0.01_peak_1126
chr1	167308303	167309106	cr_wt.0.01_peak_1127
chr1	167339251	167339437	cr_wt.0.01_peak_1128
chr1	167340178	167340521	cr_wt.0.01_peak_1129
chr1	167349732	167350253	cr_wt.0.01_peak_1130
chr1	167393219	167394523	cr_wt.0.01_peak_1131
chr1	167598454	167598739	cr_wt.0.01_peak_1132
chr1	167945756	167946491	cr_wt.0.01_peak_1133
chr1	168008572	168008743	cr_wt.0.01_peak_1134
chr1	168046120	168046849	cr_wt.0.01_peak_1135
chr1	168214530	168214720	cr_wt.0.01_peak_1136
chr1	168216107	168216628	cr_wt.0.01_peak_1137
chr1	168221315	168221792	cr_wt.0.01_peak_1138
chr1	168221957	168222227	cr_wt.0.01_peak_1139
chr1	168236335	168236572	cr_wt.0.01_peak_1140
chr1	168240523	168241771	cr_wt.0.01_peak_1141
chr1	168245435	168245779	cr_wt.0.01_peak_1142
chr1	168246650	168247381	cr_wt.0.01_peak_1143
chr1	168308858	168309267	cr_wt.0.01_peak_1144
chr1	168323358	168323542	cr_wt.0.01_peak_1145
chr1	168327621	168328372	cr_wt.0.01_peak_1146
chr1	168356991	168357790	cr_wt.0.01_peak_1147
chr1	168381617	168381817	cr_wt.0.01_peak_1148
chr1	168392233	168392410	cr_wt.0.01_peak_1149
chr1	168417943	168418147	cr_wt.0.01_peak_1150
chr1	168427178	168430673	cr_wt.0.01_peak_1151
chr1	168431368	168433298	cr_wt.0.01_peak_1152
chr1	168549992	168550923	cr_wt.0.01_peak_1153
chr1	169066628	169067564	cr_wt.0.01_peak_1154
chr1	169156114	169156784	cr_wt.0.01_peak_1155
chr1	169313449	169313652	cr_wt.0.01_peak_1156
chr1	169421334	169421859	cr_wt.0.01_peak_1157
chr1	169462715	169463169	cr_wt.0.01_peak_1158
chr1	169531200	169532122	cr_wt.0.01_peak_1159
chr1	169934271	169934469	cr_wt.0.01_peak_1160
chr1	169968756	169969954	cr_wt.0.01_peak_1161
chr1	170173934	170175312	cr_wt.0.01_peak_1162
chr1	170589951	170590285	cr_wt.0.01_peak_1163
chr1	170644185	170644752	cr_wt.0.01_peak_1164
chr1	170655539	170656036	cr_wt.0.01_peak_1165
chr1	170656911	170657261	cr_wt.0.01_peak_1166
chr1	170867402	170867657	cr_wt.0.01_peak_1167
chr1	170867878	170868964	cr_wt.0.01_peak_1168
chr1	171033156	171033897	cr_wt.0.01_peak_1169
chr1	171034346	171034537	cr_wt.0.01_peak_1170
chr1	171036771	171037970	cr_wt.0.01_peak_1171
chr1	171038168	171038525	cr_wt.0.01_peak_1172
chr1	171044250	171044884	cr_wt.0.01_peak_1173
chr1	171110740	171112054	cr_wt.0.01_peak_1174
chr1	171150011	171151068	cr_wt.0.01_peak_1175
chr1	171222442	171223080	cr_wt.0.01_peak_1176
chr1	171246832	171247598	cr_wt.0.01_peak_1177
chr1	171250411	171250713	cr_wt.0.01_peak_1178
chr1	171262250	171263073	cr_wt.0.01_peak_1179
chr1	171263291	171264077	cr_wt.0.01_peak_1180
chr1	171270031	171270257	cr_wt.0.01_peak_1181
chr1	171280926	171281684	cr_wt.0.01_peak_1182
chr1	171287582	171288287	cr_wt.0.01_peak_1183
chr1	171294582	171295258	cr_wt.0.01_peak_1184
chr1	171328470	171329874	cr_wt.0.01_peak_1185
chr1	171344567	171344911	cr_wt.0.01_peak_1186
chr1	171361002	171361653	cr_wt.0.01_peak_1187
chr1	171410797	171412141	cr_wt.0.01_peak_1188
chr1	171412370	171412576	cr_wt.0.01_peak_1189
chr1	171502659	171504224	cr_wt.0.01_peak_1190
chr1	172021940	172022142	cr_wt.0.01_peak_1191
chr1	172026514	172027901	cr_wt.0.01_peak_1192
chr1	172047128	172047449	cr_wt.0.01_peak_1193
chr1	172057348	172058106	cr_wt.0.01_peak_1194
chr1	172082326	172082740	cr_wt.0.01_peak_1195
chr1	172126809	172126989	cr_wt.0.01_peak_1196
chr1	172147695	172149128	cr_wt.0.01_peak_1197
chr1	172200702	172201627	cr_wt.0.01_peak_1198
chr1	172206279	172206552	cr_wt.0.01_peak_1199
chr1	172207146	172207374	cr_wt.0.01_peak_1200
chr1	172309542	172310524	cr_wt.0.01_peak_1201
chr1	172311740	172312163	cr_wt.0.01_peak_1202
chr1	172314750	172314930	cr_wt.0.01_peak_1203
chr1	172341253	172341857	cr_wt.0.01_peak_1204
chr1	172350418	172350675	cr_wt.0.01_peak_1205
chr1	172375940	172377154	cr_wt.0.01_peak_1206
chr1	172481590	172482500	cr_wt.0.01_peak_1207
chr1	172483038	172483316	cr_wt.0.01_peak_1208
chr1	172502938	172503099	cr_wt.0.01_peak_1209
chr1	172632566	172633520	cr_wt.0.01_peak_1210
chr1	173367085	173367560	cr_wt.0.01_peak_1211
chr1	173389328	173390085	cr_wt.0.01_peak_1212
chr1	175492826	175493179	cr_wt.0.01_peak_1213
chr1	175625196	175626169	cr_wt.0.01_peak_1214
chr1	175692196	175693345	cr_wt.0.01_peak_1215
chr1	175880528	175880791	cr_wt.0.01_peak_1216
chr1	176801208	176801397	cr_wt.0.01_peak_1217
chr1	176813051	176815350	cr_wt.0.01_peak_1218
chr1	176877588	176879583	cr_wt.0.01_peak_1219
chr1	176880793	176881441	cr_wt.0.01_peak_1220
chr1	176885057	176886122	cr_wt.0.01_peak_1221
chr1	176929243	176932241	cr_wt.0.01_peak_1222
chr1	176932719	176934894	cr_wt.0.01_peak_1223
chr1	176935826	176936128	cr_wt.0.01_peak_1224
chr1	176946203	176947867	cr_wt.0.01_peak_1225
chr1	176948102	176948266	cr_wt.0.01_peak_1226
chr1	176948809	176949996	cr_wt.0.01_peak_1227
chr1	176985475	176986314	cr_wt.0.01_peak_1228
chr1	176994192	176995469	cr_wt.0.01_peak_1229
chr1	176996159	176997528	cr_wt.0.01_peak_1230
chr1	176998002	176998591	cr_wt.0.01_peak_1231
chr1	176998776	176999165	cr_wt.0.01_peak_1232
chr1	177015498	177016246	cr_wt.0.01_peak_1233
chr1	177035278	177035918	cr_wt.0.01_peak_1234
chr1	177036309	177036577	cr_wt.0.01_peak_1235
chr1	177038407	177040287	cr_wt.0.01_peak_1236
chr1	177045639	177046075	cr_wt.0.01_peak_1237
chr1	177046810	177047067	cr_wt.0.01_peak_1238
chr1	177050585	177050853	cr_wt.0.01_peak_1239
chr1	177051155	177054425	cr_wt.0.01_peak_1240
chr1	177054707	177055621	cr_wt.0.01_peak_1241
chr1	177129521	177129841	cr_wt.0.01_peak_1242
chr1	177149969	177151615	cr_wt.0.01_peak_1243
chr1	177165199	177166026	cr_wt.0.01_peak_1244
chr1	177166674	177167026	cr_wt.0.01_peak_1245
chr1	177187985	177188171	cr_wt.0.01_peak_1246
chr1	177188371	177189250	cr_wt.0.01_peak_1247
chr1	177194312	177194758	cr_wt.0.01_peak_1248
chr1	177196197	177196529	cr_wt.0.01_peak_1249
chr1	177198579	177199137	cr_wt.0.01_peak_1250
chr1	177199373	177199654	cr_wt.0.01_peak_1251
chr1	177231840	177232017	cr_wt.0.01_peak_1252
chr1	177254317	177256016	cr_wt.0.01_peak_1253
chr1	177441020	177442379	cr_wt.0.01_peak_1255
chr1	177447893	177448670	cr_wt.0.01_peak_1257
chr1	177448945	177449371	cr_wt.0.01_peak_1258
chr1	177449550	177449943	cr_wt.0.01_peak_1259
chr1	177450853	177451058	cr_wt.0.01_peak_1260
chr1	177451294	177452186	cr_wt.0.01_peak_1261
chr1	177453185	177453592	cr_wt.0.01_peak_1262
chr1	177458765	177460521	cr_wt.0.01_peak_1263
chr1	177462299	177463251	cr_wt.0.01_peak_1264
chr1	177494537	177495089	cr_wt.0.01_peak_1265
chr1	177573151	177574499	cr_wt.0.01_peak_1266
chr1	177684084	177685539	cr_wt.0.01_peak_1267
chr1	177702769	177703243	cr_wt.0.01_peak_1268
chr1	177794907	177795169	cr_wt.0.01_peak_1269
chr1	177795602	177797219	cr_wt.0.01_peak_1270
chr1	177983050	177983369	cr_wt.0.01_peak_1271
chr1	178187287	178187656	cr_wt.0.01_peak_1272
chr1	178275832	178276692	cr_wt.0.01_peak_1273
chr1	178317787	178319543	cr_wt.0.01_peak_1274
chr1	178335699	178338708	cr_wt.0.01_peak_1275
chr1	178368624	178369538	cr_wt.0.01_peak_1276
chr1	178405920	178406787	cr_wt.0.01_peak_1277
chr1	178527524	178527794	cr_wt.0.01_peak_1278
chr1	178528153	178528539	cr_wt.0.01_peak_1279
chr1	178530294	178530688	cr_wt.0.01_peak_1280
chr1	179433300	179433732	cr_wt.0.01_peak_1281
chr1	179458730	179458922	cr_wt.0.01_peak_1282
chr1	179517767	179518097	cr_wt.0.01_peak_1283
chr1	179545789	179546926	cr_wt.0.01_peak_1284
chr1	179581703	179582052	cr_wt.0.01_peak_1285
chr1	179612781	179613073	cr_wt.0.01_peak_1286
chr1	179668346	179668574	cr_wt.0.01_peak_1287
chr1	179803052	179804305	cr_wt.0.01_peak_1288
chr1	179959613	179960641	cr_wt.0.01_peak_1289
chr1	180195640	180196605	cr_wt.0.01_peak_1290
chr1	180313736	180314190	cr_wt.0.01_peak_1291
chr1	180364890	180366070	cr_wt.0.01_peak_1292
chr1	180367509	180367687	cr_wt.0.01_peak_1293
chr1	180387116	180387988	cr_wt.0.01_peak_1294
chr1	180428321	180428883	cr_wt.0.01_peak_1295
chr1	180568519	180569327	cr_wt.0.01_peak_1296
chr1	180641368	180641784	cr_wt.0.01_peak_1297
chr1	180763823	180764072	cr_wt.0.01_peak_1298
chr1	180777804	180778051	cr_wt.0.01_peak_1299
chr1	180812568	180814244	cr_wt.0.01_peak_1300
chr1	180848347	180848867	cr_wt.0.01_peak_1301
chr1	180850268	180851350	cr_wt.0.01_peak_1302
chr1	180904319	180904780	cr_wt.0.01_peak_1303
chr1	181143863	181144715	cr_wt.0.01_peak_1304
chr1	181212060	181212456	cr_wt.0.01_peak_1305
chr1	181369144	181369335	cr_wt.0.01_peak_1306
chr1	181369627	181369876	cr_wt.0.01_peak_1307
chr1	181370304	181370837	cr_wt.0.01_peak_1308
chr1	181545167	181545451	cr_wt.0.01_peak_1309
chr1	181841877	181842783	cr_wt.0.01_peak_1310
chr1	181980161	181980472	cr_wt.0.01_peak_1311
chr1	182018690	182019533	cr_wt.0.01_peak_1312
chr1	182020098	182020542	cr_wt.0.01_peak_1313
chr1	182124172	182125225	cr_wt.0.01_peak_1314
chr1	182282354	182282619	cr_wt.0.01_peak_1315
chr1	182282828	182282994	cr_wt.0.01_peak_1316
chr1	182341145	182342087	cr_wt.0.01_peak_1317
chr1	182408414	182410002	cr_wt.0.01_peak_1318
chr1	182489746	182490245	cr_wt.0.01_peak_1319
chr1	182539104	182539502	cr_wt.0.01_peak_1320
chr1	182990940	182991460	cr_wt.0.01_peak_1321
chr1	183181283	183181512	cr_wt.0.01_peak_1322
chr1	183182841	183183232	cr_wt.0.01_peak_1323
chr1	183296512	183297936	cr_wt.0.01_peak_1324
chr1	183345047	183345885	cr_wt.0.01_peak_1325
chr1	183366623	183366787	cr_wt.0.01_peak_1326
chr1	183369309	183369730	cr_wt.0.01_peak_1327
chr1	183793920	183794231	cr_wt.0.01_peak_1328
chr1	184033591	184034673	cr_wt.0.01_peak_1329
chr1	184187508	184187935	cr_wt.0.01_peak_1330
chr1	184423956	184424487	cr_wt.0.01_peak_1331
chr1	184845436	184846058	cr_wt.0.01_peak_1332
chr1	184905349	184906405	cr_wt.0.01_peak_1333
chr1	185000035	185000614	cr_wt.0.01_peak_1334
chr1	185203769	185204484	cr_wt.0.01_peak_1335
chr1	185285044	185285361	cr_wt.0.01_peak_1336
chr1	185328563	185329344	cr_wt.0.01_peak_1337
chr1	185363102	185363696	cr_wt.0.01_peak_1338
chr1	185438980	185439967	cr_wt.0.01_peak_1339
chr1	185441294	185442007	cr_wt.0.01_peak_1340
chr1	185455010	185455481	cr_wt.0.01_peak_1341
chr1	185500737	185501050	cr_wt.0.01_peak_1342
chr1	186066379	186066771	cr_wt.0.01_peak_1343
chr1	186116899	186117288	cr_wt.0.01_peak_1344
chr1	186278107	186278895	cr_wt.0.01_peak_1345
chr1	186661083	186661283	cr_wt.0.01_peak_1346
chr1	186749436	186749601	cr_wt.0.01_peak_1347
chr1	186909581	186909761	cr_wt.0.01_peak_1348
chr1	186925494	186925903	cr_wt.0.01_peak_1349
chr1	186988662	186988836	cr_wt.0.01_peak_1350
chr1	187215201	187215821	cr_wt.0.01_peak_1351
chr1	187328649	187328812	cr_wt.0.01_peak_1352
chr1	187418753	187418924	cr_wt.0.01_peak_1353
chr1	188147318	188147555	cr_wt.0.01_peak_1354
chr1	188616360	188617135	cr_wt.0.01_peak_1355
chr1	189007789	189008087	cr_wt.0.01_peak_1356
chr1	189079583	189080180	cr_wt.0.01_peak_1357
chr1	189344288	189344566	cr_wt.0.01_peak_1358
chr1	189663221	189664126	cr_wt.0.01_peak_1359
chr1	189675580	189675770	cr_wt.0.01_peak_1360
chr1	189688212	189688524	cr_wt.0.01_peak_1361
chr1	190297852	190298472	cr_wt.0.01_peak_1362
chr1	190659833	190660160	cr_wt.0.01_peak_1363
chr1	190728195	190728692	cr_wt.0.01_peak_1364
chr1	190730716	190730985	cr_wt.0.01_peak_1365
chr1	190928145	190928452	cr_wt.0.01_peak_1366
chr1	190928685	190929079	cr_wt.0.01_peak_1367
chr1	190971972	190972178	cr_wt.0.01_peak_1368
chr1	190978843	190979634	cr_wt.0.01_peak_1369
chr1	191026358	191026770	cr_wt.0.01_peak_1371
chr1	191182989	191183294	cr_wt.0.01_peak_1372
chr1	191224129	191225019	cr_wt.0.01_peak_1373
chr1	191317956	191318139	cr_wt.0.01_peak_1374
chr1	191325452	191326549	cr_wt.0.01_peak_1375
chr1	191396919	191398269	cr_wt.0.01_peak_1376
chr1	191574927	191576194	cr_wt.0.01_peak_1377
chr1	191808349	191808824	cr_wt.0.01_peak_1378
chr1	191821390	191821808	cr_wt.0.01_peak_1379
chr1	191906152	191907061	cr_wt.0.01_peak_1380
chr1	191989946	191990418	cr_wt.0.01_peak_1381
chr1	192092696	192092966	cr_wt.0.01_peak_1382
chr1	192136683	192137032	cr_wt.0.01_peak_1383
chr1	192138065	192138734	cr_wt.0.01_peak_1384
chr1	192755564	192755796	cr_wt.0.01_peak_1385
chr1	192834536	192835473	cr_wt.0.01_peak_1386
chr1	192855535	192855818	cr_wt.0.01_peak_1387
chr1	192855984	192856183	cr_wt.0.01_peak_1388
chr1	193035268	193035900	cr_wt.0.01_peak_1389
chr1	193129802	193130617	cr_wt.0.01_peak_1390
chr1	193173006	193174420	cr_wt.0.01_peak_1391
chr1	193305310	193305574	cr_wt.0.01_peak_1392
chr1	193386096	193386521	cr_wt.0.01_peak_1393
chr1	193449813	193450033	cr_wt.0.01_peak_1394
chr1	193576162	193576501	cr_wt.0.01_peak_1395
chr1	193586865	193587600	cr_wt.0.01_peak_1396
chr1	193672076	193672339	cr_wt.0.01_peak_1397
chr1	193702825	193703182	cr_wt.0.01_peak_1398
chr1	193935824	193936031	cr_wt.0.01_peak_1399
chr1	193969144	193969347	cr_wt.0.01_peak_1400
chr1	193989432	193989965	cr_wt.0.01_peak_1401
chr1	193990288	193990772	cr_wt.0.01_peak_1402
chr1	194019553	194019789	cr_wt.0.01_peak_1403
chr1	194160349	194161973	cr_wt.0.01_peak_1404
chr1	194222812	194222994	cr_wt.0.01_peak_1405
chr1	194226444	194226629	cr_wt.0.01_peak_1406
chr1	194231047	194231249	cr_wt.0.01_peak_1407
chr1	194231474	194231689	cr_wt.0.01_peak_1408
chr1	194335353	194335515	cr_wt.0.01_peak_1409
chr1	194390331	194390597	cr_wt.0.01_peak_1410
chr1	194586417	194587586	cr_wt.0.01_peak_1411
chr1	194588213	194588628	cr_wt.0.01_peak_1412
chr1	194588886	194589344	cr_wt.0.01_peak_1413
chr1	194613724	194614083	cr_wt.0.01_peak_1414
chr1	194614271	194614522	cr_wt.0.01_peak_1415
chr1	194618934	194620856	cr_wt.0.01_peak_1416
chr1	194622487	194623235	cr_wt.0.01_peak_1417
chr1	194879280	194879503	cr_wt.0.01_peak_1418
chr1	194929947	194930130	cr_wt.0.01_peak_1419
chr1	194976475	194977030	cr_wt.0.01_peak_1420
chr1	195130768	195131666	cr_wt.0.01_peak_1421
chr10	3307864	3308216	cr_wt.0.01_peak_1422
chr10	3973679	3973963	cr_wt.0.01_peak_1423
chr10	4071360	4071628	cr_wt.0.01_peak_1424
chr10	4386227	4387480	cr_wt.0.01_peak_1425
chr10	4388094	4388535	cr_wt.0.01_peak_1426
chr10	4431924	4432852	cr_wt.0.01_peak_1427
chr10	5805031	5806229	cr_wt.0.01_peak_1428
chr10	5823811	5824548	cr_wt.0.01_peak_1429
chr10	5922420	5922646	cr_wt.0.01_peak_1430
chr10	6916469	6917150	cr_wt.0.01_peak_1431
chr10	6979498	6979735	cr_wt.0.01_peak_1432
chr10	7158488	7158747	cr_wt.0.01_peak_1433
chr10	7212312	7212517	cr_wt.0.01_peak_1434
chr10	7268132	7269263	cr_wt.0.01_peak_1435
chr10	7589850	7590861	cr_wt.0.01_peak_1436
chr10	7662398	7662560	cr_wt.0.01_peak_1437
chr10	7663038	7663586	cr_wt.0.01_peak_1438
chr10	7667215	7667807	cr_wt.0.01_peak_1439
chr10	7725606	7726369	cr_wt.0.01_peak_1440
chr10	7779793	7780149	cr_wt.0.01_peak_1441
chr10	7780574	7781190	cr_wt.0.01_peak_1442
chr10	8038505	8038743	cr_wt.0.01_peak_1443
chr10	8518474	8518854	cr_wt.0.01_peak_1444
chr10	8577828	8578341	cr_wt.0.01_peak_1445
chr10	8624445	8624669	cr_wt.0.01_peak_1446
chr10	8686940	8687101	cr_wt.0.01_peak_1447
chr10	8760235	8760619	cr_wt.0.01_peak_1448
chr10	9014723	9014960	cr_wt.0.01_peak_1449
chr10	9420322	9420650	cr_wt.0.01_peak_1450
chr10	9866697	9866926	cr_wt.0.01_peak_1451
chr10	9900119	9900565	cr_wt.0.01_peak_1452
chr10	9901095	9902487	cr_wt.0.01_peak_1453
chr10	10321162	10321382	cr_wt.0.01_peak_1454
chr10	11149148	11149586	cr_wt.0.01_peak_1455
chr10	11280501	11281883	cr_wt.0.01_peak_1456
chr10	11343236	11343696	cr_wt.0.01_peak_1457
chr10	12921907	12923649	cr_wt.0.01_peak_1458
chr10	12964057	12964290	cr_wt.0.01_peak_1459
chr10	13008021	13008336	cr_wt.0.01_peak_1460
chr10	13008567	13008841	cr_wt.0.01_peak_1461
chr10	13090822	13091127	cr_wt.0.01_peak_1462
chr10	13093239	13093404	cr_wt.0.01_peak_1463
chr10	13170924	13171430	cr_wt.0.01_peak_1464
chr10	13172998	13173161	cr_wt.0.01_peak_1465
chr10	13192540	13193473	cr_wt.0.01_peak_1466
chr10	13305050	13305426	cr_wt.0.01_peak_1467
chr10	13552830	13553116	cr_wt.0.01_peak_1468
chr10	13868519	13868987	cr_wt.0.01_peak_1469
chr10	13965061	13966783	cr_wt.0.01_peak_1470
chr10	13967513	13968501	cr_wt.0.01_peak_1471
chr10	13969929	13970370	cr_wt.0.01_peak_1472
chr10	13973222	13974049	cr_wt.0.01_peak_1473
chr10	14085038	14085367	cr_wt.0.01_peak_1474
chr10	14108024	14108468	cr_wt.0.01_peak_1475
chr10	14179370	14180629	cr_wt.0.01_peak_1476
chr10	14199148	14200154	cr_wt.0.01_peak_1477
chr10	14207666	14208192	cr_wt.0.01_peak_1478
chr10	14215552	14215884	cr_wt.0.01_peak_1479
chr10	14216450	14216785	cr_wt.0.01_peak_1480
chr10	14390749	14390941	cr_wt.0.01_peak_1481
chr10	14391244	14391419	cr_wt.0.01_peak_1482
chr10	14704947	14705747	cr_wt.0.01_peak_1483
chr10	15300047	15300533	cr_wt.0.01_peak_1484
chr10	15397482	15397697	cr_wt.0.01_peak_1485
chr10	16030917	16031293	cr_wt.0.01_peak_1486
chr10	16442002	16442270	cr_wt.0.01_peak_1487
chr10	17022596	17022777	cr_wt.0.01_peak_1488
chr10	17202963	17203488	cr_wt.0.01_peak_1489
chr10	17230341	17230749	cr_wt.0.01_peak_1490
chr10	17331695	17331869	cr_wt.0.01_peak_1491
chr10	17478490	17479287	cr_wt.0.01_peak_1492
chr10	17607974	17608649	cr_wt.0.01_peak_1493
chr10	17631748	17632386	cr_wt.0.01_peak_1494
chr10	17724620	17724859	cr_wt.0.01_peak_1496
chr10	17725084	17725823	cr_wt.0.01_peak_1497
chr10	17727864	17728072	cr_wt.0.01_peak_1498
chr10	17947532	17948669	cr_wt.0.01_peak_1499
chr10	17983120	17983850	cr_wt.0.01_peak_1500
chr10	18019757	18019954	cr_wt.0.01_peak_1501
chr10	18020453	18022854	cr_wt.0.01_peak_1502
chr10	18023051	18023392	cr_wt.0.01_peak_1503
chr10	18055193	18055401	cr_wt.0.01_peak_1504
chr10	18055777	18056621	cr_wt.0.01_peak_1505
chr10	18234547	18235792	cr_wt.0.01_peak_1506
chr10	18329417	18329794	cr_wt.0.01_peak_1507
chr10	18388850	18389567	cr_wt.0.01_peak_1508
chr10	18403775	18404889	cr_wt.0.01_peak_1509
chr10	18407646	18409155	cr_wt.0.01_peak_1510
chr10	18444980	18445211	cr_wt.0.01_peak_1511
chr10	18482575	18483054	cr_wt.0.01_peak_1512
chr10	18483245	18483426	cr_wt.0.01_peak_1513
chr10	18505716	18505950	cr_wt.0.01_peak_1514
chr10	18522374	18523058	cr_wt.0.01_peak_1515
chr10	18527304	18528832	cr_wt.0.01_peak_1516
chr10	18529980	18530297	cr_wt.0.01_peak_1517
chr10	18549437	18549644	cr_wt.0.01_peak_1518
chr10	18549902	18550167	cr_wt.0.01_peak_1519
chr10	18743421	18744082	cr_wt.0.01_peak_1520
chr10	18816232	18816667	cr_wt.0.01_peak_1521
chr10	19015585	19016041	cr_wt.0.01_peak_1522
chr10	19186244	19186406	cr_wt.0.01_peak_1523
chr10	19277077	19277924	cr_wt.0.01_peak_1524
chr10	19310349	19310597	cr_wt.0.01_peak_1525
chr10	19373828	19374051	cr_wt.0.01_peak_1526
chr10	19423940	19424135	cr_wt.0.01_peak_1527
chr10	19471257	19472758	cr_wt.0.01_peak_1528
chr10	19502593	19503427	cr_wt.0.01_peak_1529
chr10	19922831	19923080	cr_wt.0.01_peak_1531
chr10	20170707	20170898	cr_wt.0.01_peak_1532
chr10	20290424	20290797	cr_wt.0.01_peak_1533
chr10	20311497	20313191	cr_wt.0.01_peak_1534
chr10	20347293	20347651	cr_wt.0.01_peak_1535
chr10	20347826	20348037	cr_wt.0.01_peak_1536
chr10	20380691	20381305	cr_wt.0.01_peak_1537
chr10	20658580	20658818	cr_wt.0.01_peak_1538
chr10	20935435	20935672	cr_wt.0.01_peak_1539
chr10	20944370	20944958	cr_wt.0.01_peak_1540
chr10	20951860	20953151	cr_wt.0.01_peak_1541
chr10	21145066	21145233	cr_wt.0.01_peak_1542
chr10	21296030	21296588	cr_wt.0.01_peak_1543
chr10	21994547	21995107	cr_wt.0.01_peak_1544
chr10	21995606	21995957	cr_wt.0.01_peak_1545
chr10	22163502	22163684	cr_wt.0.01_peak_1546
chr10	22645336	22645529	cr_wt.0.01_peak_1547
chr10	22730833	22732031	cr_wt.0.01_peak_1548
chr10	22746425	22747003	cr_wt.0.01_peak_1549
chr10	23159932	23160330	cr_wt.0.01_peak_1550
chr10	23349946	23350173	cr_wt.0.01_peak_1551
chr10	23786706	23788033	cr_wt.0.01_peak_1552
chr10	23797123	23797442	cr_wt.0.01_peak_1553
chr10	23812304	23812532	cr_wt.0.01_peak_1554
chr10	24148882	24149687	cr_wt.0.01_peak_1555
chr10	24869500	24870401	cr_wt.0.01_peak_1556
chr10	24990067	24990370	cr_wt.0.01_peak_1557
chr10	25296687	25297069	cr_wt.0.01_peak_1558
chr10	25311584	25312034	cr_wt.0.01_peak_1559
chr10	25359582	25360082	cr_wt.0.01_peak_1560
chr10	25982878	25983254	cr_wt.0.01_peak_1561
chr10	26077573	26077928	cr_wt.0.01_peak_1562
chr10	26078819	26079167	cr_wt.0.01_peak_1563
chr10	26373154	26373528	cr_wt.0.01_peak_1564
chr10	26374614	26374820	cr_wt.0.01_peak_1565
chr10	26375241	26376684	cr_wt.0.01_peak_1566
chr10	27069370	27069758	cr_wt.0.01_peak_1567
chr10	27104118	27104340	cr_wt.0.01_peak_1568
chr10	27133044	27133268	cr_wt.0.01_peak_1569
chr10	28073840	28075470	cr_wt.0.01_peak_1570
chr10	28075668	28075840	cr_wt.0.01_peak_1571
chr10	28159717	28160178	cr_wt.0.01_peak_1572
chr10	28391902	28392343	cr_wt.0.01_peak_1573
chr10	29143037	29144947	cr_wt.0.01_peak_1574
chr10	29146667	29146881	cr_wt.0.01_peak_1575
chr10	29147462	29147864	cr_wt.0.01_peak_1576
chr10	29312900	29313850	cr_wt.0.01_peak_1577
chr10	29361560	29362523	cr_wt.0.01_peak_1578
chr10	29532685	29533720	cr_wt.0.01_peak_1579
chr10	29534059	29534761	cr_wt.0.01_peak_1580
chr10	29535151	29535623	cr_wt.0.01_peak_1581
chr10	29538517	29538899	cr_wt.0.01_peak_1582
chr10	29581341	29582462	cr_wt.0.01_peak_1583
chr10	29590125	29590430	cr_wt.0.01_peak_1584
chr10	29689256	29689612	cr_wt.0.01_peak_1585
chr10	29819171	29819427	cr_wt.0.01_peak_1586
chr10	29820529	29821371	cr_wt.0.01_peak_1587
chr10	29823421	29823869	cr_wt.0.01_peak_1588
chr10	29824684	29825048	cr_wt.0.01_peak_1589
chr10	29825361	29825664	cr_wt.0.01_peak_1590
chr10	30200057	30201008	cr_wt.0.01_peak_1591
chr10	30600147	30601003	cr_wt.0.01_peak_1592
chr10	30624158	30624783	cr_wt.0.01_peak_1594
chr10	30802194	30803574	cr_wt.0.01_peak_1595
chr10	30810617	30811371	cr_wt.0.01_peak_1596
chr10	30842978	30843266	cr_wt.0.01_peak_1597
chr10	31313427	31313811	cr_wt.0.01_peak_1598
chr10	31445622	31445888	cr_wt.0.01_peak_1599
chr10	32414490	32414881	cr_wt.0.01_peak_1600
chr10	32796034	32796790	cr_wt.0.01_peak_1601
chr10	32870559	32871757	cr_wt.0.01_peak_1602
chr10	32889774	32890436	cr_wt.0.01_peak_1603
chr10	33732661	33733169	cr_wt.0.01_peak_1604
chr10	34019223	34020108	cr_wt.0.01_peak_1605
chr10	34280652	34280994	cr_wt.0.01_peak_1606
chr10	34281355	34282248	cr_wt.0.01_peak_1607
chr10	34296763	34297934	cr_wt.0.01_peak_1608
chr10	34878763	34878965	cr_wt.0.01_peak_1609
chr10	34904478	34904994	cr_wt.0.01_peak_1610
chr10	36393448	36393971	cr_wt.0.01_peak_1611
chr10	36506468	36507036	cr_wt.0.01_peak_1612
chr10	37135390	37136188	cr_wt.0.01_peak_1614
chr10	37136833	37138266	cr_wt.0.01_peak_1615
chr10	37138470	37141739	cr_wt.0.01_peak_1616
chr10	37404668	37404947	cr_wt.0.01_peak_1617
chr10	38010231	38010705	cr_wt.0.01_peak_1618
chr10	38553977	38554636	cr_wt.0.01_peak_1619
chr10	38554976	38555456	cr_wt.0.01_peak_1620
chr10	39133402	39134169	cr_wt.0.01_peak_1621
chr10	39171319	39172521	cr_wt.0.01_peak_1622
chr10	39239585	39239890	cr_wt.0.01_peak_1623
chr10	39320777	39321431	cr_wt.0.01_peak_1624
chr10	39321698	39322044	cr_wt.0.01_peak_1625
chr10	39369204	39370060	cr_wt.0.01_peak_1626
chr10	39392765	39392940	cr_wt.0.01_peak_1627
chr10	39427206	39427422	cr_wt.0.01_peak_1628
chr10	39519900	39521064	cr_wt.0.01_peak_1629
chr10	39542054	39542273	cr_wt.0.01_peak_1630
chr10	39659724	39660426	cr_wt.0.01_peak_1631
chr10	39731055	39733361	cr_wt.0.01_peak_1632
chr10	39733687	39733950	cr_wt.0.01_peak_1633
chr10	39898969	39899449	cr_wt.0.01_peak_1634
chr10	39959891	39960714	cr_wt.0.01_peak_1635
chr10	40025095	40025745	cr_wt.0.01_peak_1636
chr10	40142212	40142461	cr_wt.0.01_peak_1637
chr10	40247122	40247340	cr_wt.0.01_peak_1638
chr10	40256542	40259195	cr_wt.0.01_peak_1639
chr10	40300710	40301177	cr_wt.0.01_peak_1640
chr10	40301452	40301714	cr_wt.0.01_peak_1641
chr10	40417262	40417461	cr_wt.0.01_peak_1644
chr10	40762017	40763099	cr_wt.0.01_peak_1645
chr10	40882806	40884086	cr_wt.0.01_peak_1646
chr10	40884253	40884708	cr_wt.0.01_peak_1647
chr10	41302631	41304347	cr_wt.0.01_peak_1648
chr10	41449986	41450199	cr_wt.0.01_peak_1649
chr10	41450384	41450678	cr_wt.0.01_peak_1650
chr10	41477060	41477682	cr_wt.0.01_peak_1651
chr10	41490567	41490772	cr_wt.0.01_peak_1652
chr10	41518615	41520440	cr_wt.0.01_peak_1653
chr10	41652159	41652389	cr_wt.0.01_peak_1654
chr10	41809490	41811183	cr_wt.0.01_peak_1655
chr10	41886926	41887685	cr_wt.0.01_peak_1656
chr10	41932247	41932524	cr_wt.0.01_peak_1657
chr10	41934690	41936850	cr_wt.0.01_peak_1658
chr10	42018104	42018561	cr_wt.0.01_peak_1659
chr10	42274669	42274839	cr_wt.0.01_peak_1660
chr10	42275635	42278410	cr_wt.0.01_peak_1661
chr10	42478046	42478867	cr_wt.0.01_peak_1662
chr10	42637092	42637354	cr_wt.0.01_peak_1663
chr10	42678744	42679381	cr_wt.0.01_peak_1664
chr10	42761012	42761994	cr_wt.0.01_peak_1665
chr10	42762522	42762698	cr_wt.0.01_peak_1666
chr10	42863764	42863971	cr_wt.0.01_peak_1667
chr10	42957972	42958799	cr_wt.0.01_peak_1668
chr10	43023309	43024382	cr_wt.0.01_peak_1669
chr10	43052600	43052841	cr_wt.0.01_peak_1670
chr10	43075680	43076466	cr_wt.0.01_peak_1671
chr10	43172823	43173304	cr_wt.0.01_peak_1672
chr10	43174513	43174768	cr_wt.0.01_peak_1673
chr10	43220633	43221579	cr_wt.0.01_peak_1674
chr10	43317871	43318268	cr_wt.0.01_peak_1675
chr10	43396151	43396370	cr_wt.0.01_peak_1676
chr10	43474888	43475057	cr_wt.0.01_peak_1677
chr10	43477864	43480432	cr_wt.0.01_peak_1678
chr10	43540787	43541276	cr_wt.0.01_peak_1679
chr10	43577718	43580982	cr_wt.0.01_peak_1680
chr10	43600082	43600378	cr_wt.0.01_peak_1681
chr10	43601559	43602526	cr_wt.0.01_peak_1682
chr10	43631386	43632137	cr_wt.0.01_peak_1683
chr10	43740381	43740546	cr_wt.0.01_peak_1684
chr10	43901467	43901982	cr_wt.0.01_peak_1685
chr10	44378158	44378377	cr_wt.0.01_peak_1686
chr10	44529589	44529851	cr_wt.0.01_peak_1687
chr10	45000499	45001190	cr_wt.0.01_peak_1688
chr10	45066824	45067012	cr_wt.0.01_peak_1689
chr10	45104409	45104748	cr_wt.0.01_peak_1690
chr10	45147348	45147601	cr_wt.0.01_peak_1691
chr10	45289613	45289846	cr_wt.0.01_peak_1692
chr10	45486282	45486958	cr_wt.0.01_peak_1693
chr10	45577843	45578389	cr_wt.0.01_peak_1694
chr10	46011864	46012376	cr_wt.0.01_peak_1695
chr10	46057608	46057813	cr_wt.0.01_peak_1696
chr10	46070637	46071041	cr_wt.0.01_peak_1697
chr10	46235878	46236054	cr_wt.0.01_peak_1698
chr10	46331292	46332112	cr_wt.0.01_peak_1699
chr10	46697549	46698311	cr_wt.0.01_peak_1700
chr10	46717872	46718035	cr_wt.0.01_peak_1701
chr10	46718596	46719325	cr_wt.0.01_peak_1702
chr10	46761704	46761886	cr_wt.0.01_peak_1703
chr10	46826534	46827893	cr_wt.0.01_peak_1704
chr10	47978495	47978797	cr_wt.0.01_peak_1705
chr10	47978971	47979142	cr_wt.0.01_peak_1706
chr10	48472645	48473338	cr_wt.0.01_peak_1707
chr10	49219735	49220172	cr_wt.0.01_peak_1708
chr10	49256366	49256907	cr_wt.0.01_peak_1709
chr10	49497186	49497400	cr_wt.0.01_peak_1710
chr10	49560267	49560693	cr_wt.0.01_peak_1711
chr10	49781959	49782294	cr_wt.0.01_peak_1712
chr10	49782887	49783102	cr_wt.0.01_peak_1713
chr10	49783698	49783885	cr_wt.0.01_peak_1714
chr10	49784654	49785401	cr_wt.0.01_peak_1715
chr10	49788507	49789304	cr_wt.0.01_peak_1716
chr10	49985004	49985166	cr_wt.0.01_peak_1717
chr10	50592214	50593405	cr_wt.0.01_peak_1718
chr10	50842679	50844276	cr_wt.0.01_peak_1719
chr10	50894196	50895071	cr_wt.0.01_peak_1720
chr10	51015192	51015551	cr_wt.0.01_peak_1721
chr10	51553478	51553972	cr_wt.0.01_peak_1722
chr10	52381915	52382750	cr_wt.0.01_peak_1723
chr10	52385056	52385228	cr_wt.0.01_peak_1724
chr10	52416905	52417991	cr_wt.0.01_peak_1725
chr10	52690397	52690792	cr_wt.0.01_peak_1726
chr10	52704055	52705014	cr_wt.0.01_peak_1727
chr10	52742718	52743215	cr_wt.0.01_peak_1728
chr10	52808353	52808554	cr_wt.0.01_peak_1729
chr10	53377325	53377576	cr_wt.0.01_peak_1730
chr10	53378884	53379845	cr_wt.0.01_peak_1731
chr10	53429363	53429584	cr_wt.0.01_peak_1732
chr10	53430148	53430506	cr_wt.0.01_peak_1733
chr10	53462784	53463049	cr_wt.0.01_peak_1734
chr10	53464793	53465053	cr_wt.0.01_peak_1735
chr10	53596152	53597612	cr_wt.0.01_peak_1736
chr10	53612086	53612387	cr_wt.0.01_peak_1737
chr10	53612578	53612937	cr_wt.0.01_peak_1738
chr10	53629249	53630406	cr_wt.0.01_peak_1739
chr10	53978436	53979151	cr_wt.0.01_peak_1740
chr10	56115417	56115686	cr_wt.0.01_peak_1741
chr10	56228571	56229285	cr_wt.0.01_peak_1742
chr10	56377193	56378420	cr_wt.0.01_peak_1743
chr10	56839412	56839646	cr_wt.0.01_peak_1744
chr10	56969190	56969451	cr_wt.0.01_peak_1745
chr10	56982193	56982658	cr_wt.0.01_peak_1746
chr10	57313733	57314249	cr_wt.0.01_peak_1747
chr10	57319038	57319570	cr_wt.0.01_peak_1748
chr10	57322653	57323382	cr_wt.0.01_peak_1749
chr10	57436977	57437195	cr_wt.0.01_peak_1750
chr10	57437784	57438021	cr_wt.0.01_peak_1751
chr10	57440726	57440954	cr_wt.0.01_peak_1752
chr10	57442181	57442563	cr_wt.0.01_peak_1753
chr10	57443110	57443497	cr_wt.0.01_peak_1754
chr10	57447162	57448467	cr_wt.0.01_peak_1755
chr10	57485852	57487403	cr_wt.0.01_peak_1756
chr10	57532173	57532832	cr_wt.0.01_peak_1757
chr10	57743657	57744437	cr_wt.0.01_peak_1758
chr10	57784007	57784354	cr_wt.0.01_peak_1759
chr10	57784539	57785053	cr_wt.0.01_peak_1760
chr10	58209807	58210006	cr_wt.0.01_peak_1761
chr10	58255322	58255898	cr_wt.0.01_peak_1762
chr10	58322891	58323630	cr_wt.0.01_peak_1763
chr10	58446023	58447405	cr_wt.0.01_peak_1764
chr10	58476844	58477509	cr_wt.0.01_peak_1765
chr10	58497800	58498259	cr_wt.0.01_peak_1766
chr10	58812136	58812822	cr_wt.0.01_peak_1767
chr10	58813316	58813548	cr_wt.0.01_peak_1768
chr10	58813891	58814124	cr_wt.0.01_peak_1769
chr10	58982306	58982653	cr_wt.0.01_peak_1770
chr10	59105100	59105400	cr_wt.0.01_peak_1771
chr10	59220685	59220848	cr_wt.0.01_peak_1772
chr10	59221363	59222003	cr_wt.0.01_peak_1773
chr10	59222702	59222961	cr_wt.0.01_peak_1774
chr10	59322633	59324487	cr_wt.0.01_peak_1775
chr10	59386950	59387521	cr_wt.0.01_peak_1776
chr10	59460038	59460204	cr_wt.0.01_peak_1777
chr10	59616330	59616949	cr_wt.0.01_peak_1778
chr10	59702476	59702836	cr_wt.0.01_peak_1779
chr10	59879075	59880369	cr_wt.0.01_peak_1780
chr10	59897795	59899193	cr_wt.0.01_peak_1781
chr10	59899423	59899819	cr_wt.0.01_peak_1782
chr10	59950777	59952636	cr_wt.0.01_peak_1783
chr10	59975328	59975505	cr_wt.0.01_peak_1784
chr10	60002511	60003662	cr_wt.0.01_peak_1785
chr10	60193746	60194282	cr_wt.0.01_peak_1786
chr10	60277391	60278033	cr_wt.0.01_peak_1787
chr10	60686930	60687160	cr_wt.0.01_peak_1788
chr10	60691817	60692124	cr_wt.0.01_peak_1789
chr10	60752530	60752945	cr_wt.0.01_peak_1790
chr10	60827039	60827262	cr_wt.0.01_peak_1791
chr10	60831484	60831711	cr_wt.0.01_peak_1792
chr10	61080035	61080709	cr_wt.0.01_peak_1793
chr10	61147710	61148217	cr_wt.0.01_peak_1794
chr10	61648208	61648867	cr_wt.0.01_peak_1796
chr10	61680118	61680613	cr_wt.0.01_peak_1797
chr10	61694951	61695919	cr_wt.0.01_peak_1798
chr10	61783836	61784005	cr_wt.0.01_peak_1799
chr10	61978438	61978614	cr_wt.0.01_peak_1800
chr10	62101679	62102215	cr_wt.0.01_peak_1801
chr10	62110422	62111046	cr_wt.0.01_peak_1802
chr10	62128637	62128852	cr_wt.0.01_peak_1803
chr10	62230790	62231087	cr_wt.0.01_peak_1804
chr10	62340340	62340628	cr_wt.0.01_peak_1805
chr10	62449320	62450273	cr_wt.0.01_peak_1806
chr10	62486162	62486431	cr_wt.0.01_peak_1807
chr10	62486624	62487466	cr_wt.0.01_peak_1808
chr10	62577912	62578945	cr_wt.0.01_peak_1809
chr10	62601398	62602297	cr_wt.0.01_peak_1810
chr10	62650770	62651878	cr_wt.0.01_peak_1811
chr10	62791800	62792708	cr_wt.0.01_peak_1812
chr10	62864967	62865630	cr_wt.0.01_peak_1813
chr10	62920102	62920486	cr_wt.0.01_peak_1814
chr10	62920757	62921227	cr_wt.0.01_peak_1815
chr10	63022880	63025934	cr_wt.0.01_peak_1816
chr10	63026228	63026405	cr_wt.0.01_peak_1817
chr10	63026604	63026781	cr_wt.0.01_peak_1818
chr10	63100068	63100425	cr_wt.0.01_peak_1819
chr10	63243644	63244697	cr_wt.0.01_peak_1820
chr10	63382496	63383028	cr_wt.0.01_peak_1821
chr10	63429231	63430637	cr_wt.0.01_peak_1822
chr10	63582824	63583053	cr_wt.0.01_peak_1823
chr10	63804201	63804445	cr_wt.0.01_peak_1824
chr10	63805907	63806382	cr_wt.0.01_peak_1825
chr10	63839230	63839449	cr_wt.0.01_peak_1826
chr10	64083909	64084080	cr_wt.0.01_peak_1827
chr10	64084321	64085294	cr_wt.0.01_peak_1828
chr10	64087993	64088166	cr_wt.0.01_peak_1829
chr10	64090094	64090510	cr_wt.0.01_peak_1830
chr10	64376658	64377012	cr_wt.0.01_peak_1831
chr10	64543851	64544263	cr_wt.0.01_peak_1832
chr10	64675522	64675745	cr_wt.0.01_peak_1833
chr10	64750976	64751188	cr_wt.0.01_peak_1834
chr10	65079956	65080285	cr_wt.0.01_peak_1835
chr10	65101452	65101645	cr_wt.0.01_peak_1836
chr10	65107289	65108090	cr_wt.0.01_peak_1837
chr10	65110582	65111413	cr_wt.0.01_peak_1838
chr10	65114502	65115056	cr_wt.0.01_peak_1839
chr10	65117995	65119114	cr_wt.0.01_peak_1840
chr10	65178868	65179244	cr_wt.0.01_peak_1841
chr10	65186970	65187189	cr_wt.0.01_peak_1842
chr10	66546529	66546986	cr_wt.0.01_peak_1843
chr10	66574803	66574983	cr_wt.0.01_peak_1844
chr10	66641103	66641849	cr_wt.0.01_peak_1845
chr10	66814400	66814761	cr_wt.0.01_peak_1846
chr10	66909447	66909855	cr_wt.0.01_peak_1847
chr10	66920386	66921454	cr_wt.0.01_peak_1848
chr10	67004234	67004625	cr_wt.0.01_peak_1849
chr10	67004834	67005167	cr_wt.0.01_peak_1850
chr10	67096623	67097295	cr_wt.0.01_peak_1851
chr10	67126159	67127295	cr_wt.0.01_peak_1852
chr10	67185397	67186101	cr_wt.0.01_peak_1853
chr10	67285387	67285863	cr_wt.0.01_peak_1854
chr10	67315029	67315191	cr_wt.0.01_peak_1855
chr10	67482244	67482777	cr_wt.0.01_peak_1856
chr10	67487726	67487955	cr_wt.0.01_peak_1857
chr10	67548955	67549384	cr_wt.0.01_peak_1858
chr10	67912020	67912582	cr_wt.0.01_peak_1859
chr10	68191935	68192135	cr_wt.0.01_peak_1860
chr10	68278163	68278455	cr_wt.0.01_peak_1861
chr10	68278766	68279861	cr_wt.0.01_peak_1862
chr10	68280053	68280278	cr_wt.0.01_peak_1863
chr10	69044531	69044888	cr_wt.0.01_peak_1864
chr10	69213877	69214059	cr_wt.0.01_peak_1865
chr10	69465637	69466373	cr_wt.0.01_peak_1866
chr10	69533997	69534533	cr_wt.0.01_peak_1867
chr10	69534930	69535247	cr_wt.0.01_peak_1868
chr10	69574421	69574703	cr_wt.0.01_peak_1869
chr10	69594654	69595025	cr_wt.0.01_peak_1870
chr10	69764215	69764639	cr_wt.0.01_peak_1871
chr10	69859261	69859741	cr_wt.0.01_peak_1872
chr10	69979476	69979716	cr_wt.0.01_peak_1873
chr10	70059819	70060452	cr_wt.0.01_peak_1874
chr10	70096737	70097227	cr_wt.0.01_peak_1875
chr10	70098001	70098497	cr_wt.0.01_peak_1876
chr10	70440083	70441628	cr_wt.0.01_peak_1877
chr10	70599287	70600092	cr_wt.0.01_peak_1878
chr10	70861326	70861529	cr_wt.0.01_peak_1879
chr10	70993730	70993938	cr_wt.0.01_peak_1880
chr10	71159473	71159745	cr_wt.0.01_peak_1881
chr10	71238003	71238188	cr_wt.0.01_peak_1882
chr10	71238357	71238533	cr_wt.0.01_peak_1883
chr10	71284634	71285537	cr_wt.0.01_peak_1884
chr10	71344710	71345371	cr_wt.0.01_peak_1885
chr10	71347342	71348146	cr_wt.0.01_peak_1886
chr10	71422585	71422768	cr_wt.0.01_peak_1887
chr10	71426877	71427047	cr_wt.0.01_peak_1888
chr10	71479925	71480222	cr_wt.0.01_peak_1889
chr10	72654344	72655547	cr_wt.0.01_peak_1890
chr10	73098028	73098554	cr_wt.0.01_peak_1891
chr10	74269769	74269989	cr_wt.0.01_peak_1892
chr10	74387662	74388012	cr_wt.0.01_peak_1893
chr10	74388236	74388402	cr_wt.0.01_peak_1894
chr10	74933892	74934177	cr_wt.0.01_peak_1895
chr10	74966277	74966595	cr_wt.0.01_peak_1896
chr10	74966899	74967484	cr_wt.0.01_peak_1897
chr10	75036835	75037037	cr_wt.0.01_peak_1898
chr10	75060232	75060785	cr_wt.0.01_peak_1899
chr10	75062133	75062376	cr_wt.0.01_peak_1900
chr10	75211426	75212686	cr_wt.0.01_peak_1901
chr10	75436948	75437367	cr_wt.0.01_peak_1902
chr10	75478184	75478557	cr_wt.0.01_peak_1903
chr10	75516839	75518129	cr_wt.0.01_peak_1904
chr10	75559460	75559643	cr_wt.0.01_peak_1905
chr10	75559832	75560368	cr_wt.0.01_peak_1906
chr10	75586201	75586400	cr_wt.0.01_peak_1907
chr10	75703756	75703979	cr_wt.0.01_peak_1908
chr10	75704306	75704871	cr_wt.0.01_peak_1909
chr10	75744614	75744802	cr_wt.0.01_peak_1910
chr10	75764092	75764676	cr_wt.0.01_peak_1911
chr10	75837275	75837705	cr_wt.0.01_peak_1912
chr10	75859856	75860643	cr_wt.0.01_peak_1913
chr10	75873115	75873303	cr_wt.0.01_peak_1914
chr10	75893010	75893456	cr_wt.0.01_peak_1915
chr10	75920364	75921618	cr_wt.0.01_peak_1916
chr10	75921869	75922116	cr_wt.0.01_peak_1917
chr10	75979274	75979450	cr_wt.0.01_peak_1918
chr10	76031852	76032732	cr_wt.0.01_peak_1919
chr10	76237520	76237734	cr_wt.0.01_peak_1920
chr10	76442094	76443069	cr_wt.0.01_peak_1921
chr10	76468524	76469264	cr_wt.0.01_peak_1922
chr10	76531022	76531816	cr_wt.0.01_peak_1923
chr10	76961687	76962354	cr_wt.0.01_peak_1924
chr10	77032866	77033703	cr_wt.0.01_peak_1925
chr10	77258650	77260025	cr_wt.0.01_peak_1926
chr10	77342836	77343225	cr_wt.0.01_peak_1927
chr10	77419014	77419180	cr_wt.0.01_peak_1928
chr10	77605660	77605844	cr_wt.0.01_peak_1929
chr10	77606250	77606722	cr_wt.0.01_peak_1930
chr10	77902776	77903376	cr_wt.0.01_peak_1931
chr10	77978624	77978919	cr_wt.0.01_peak_1932
chr10	78009612	78009777	cr_wt.0.01_peak_1933
chr10	78104928	78105298	cr_wt.0.01_peak_1934
chr10	78169826	78170258	cr_wt.0.01_peak_1935
chr10	78184769	78185187	cr_wt.0.01_peak_1936
chr10	78244459	78245234	cr_wt.0.01_peak_1937
chr10	78392026	78392195	cr_wt.0.01_peak_1938
chr10	78412752	78413323	cr_wt.0.01_peak_1939
chr10	78425697	78425884	cr_wt.0.01_peak_1940
chr10	78574220	78574954	cr_wt.0.01_peak_1941
chr10	78722624	78723050	cr_wt.0.01_peak_1942
chr10	78727049	78728346	cr_wt.0.01_peak_1943
chr10	78752354	78752538	cr_wt.0.01_peak_1944
chr10	78752755	78753221	cr_wt.0.01_peak_1945
chr10	79097174	79097848	cr_wt.0.01_peak_1946
chr10	79554509	79554903	cr_wt.0.01_peak_1947
chr10	79637546	79638140	cr_wt.0.01_peak_1948
chr10	79668914	79669443	cr_wt.0.01_peak_1949
chr10	79681542	79682096	cr_wt.0.01_peak_1950
chr10	79703827	79705092	cr_wt.0.01_peak_1951
chr10	79746717	79746987	cr_wt.0.01_peak_1952
chr10	79766687	79767734	cr_wt.0.01_peak_1953
chr10	79780200	79780411	cr_wt.0.01_peak_1954
chr10	79793478	79794636	cr_wt.0.01_peak_1955
chr10	79853644	79855026	cr_wt.0.01_peak_1956
chr10	79855583	79855835	cr_wt.0.01_peak_1957
chr10	79857659	79857863	cr_wt.0.01_peak_1958
chr10	79874278	79874638	cr_wt.0.01_peak_1959
chr10	79908415	79908899	cr_wt.0.01_peak_1960
chr10	79925177	79925453	cr_wt.0.01_peak_1961
chr10	79925634	79925827	cr_wt.0.01_peak_1962
chr10	79959400	79960218	cr_wt.0.01_peak_1964
chr10	79983869	79986124	cr_wt.0.01_peak_1965
chr10	79996439	79997926	cr_wt.0.01_peak_1966
chr10	80039423	80040002	cr_wt.0.01_peak_1967
chr10	80053275	80054420	cr_wt.0.01_peak_1968
chr10	80102783	80102966	cr_wt.0.01_peak_1969
chr10	80114743	80115574	cr_wt.0.01_peak_1970
chr10	80117099	80117290	cr_wt.0.01_peak_1971
chr10	80141254	80142700	cr_wt.0.01_peak_1972
chr10	80148036	80150194	cr_wt.0.01_peak_1973
chr10	80151099	80152044	cr_wt.0.01_peak_1974
chr10	80159578	80160755	cr_wt.0.01_peak_1975
chr10	80167211	80168217	cr_wt.0.01_peak_1976
chr10	80172718	80173782	cr_wt.0.01_peak_1977
chr10	80226040	80226944	cr_wt.0.01_peak_1978
chr10	80249226	80249609	cr_wt.0.01_peak_1979
chr10	80260610	80261820	cr_wt.0.01_peak_1980
chr10	80264478	80265393	cr_wt.0.01_peak_1981
chr10	80291863	80292654	cr_wt.0.01_peak_1982
chr10	80295733	80296205	cr_wt.0.01_peak_1983
chr10	80300938	80301346	cr_wt.0.01_peak_1984
chr10	80329540	80330077	cr_wt.0.01_peak_1985
chr10	80385358	80386435	cr_wt.0.01_peak_1986
chr10	80387930	80388238	cr_wt.0.01_peak_1987
chr10	80398391	80400363	cr_wt.0.01_peak_1988
chr10	80432744	80434125	cr_wt.0.01_peak_1989
chr10	80475561	80475770	cr_wt.0.01_peak_1990
chr10	80561263	80562096	cr_wt.0.01_peak_1991
chr10	80566853	80567090	cr_wt.0.01_peak_1992
chr10	80576885	80577936	cr_wt.0.01_peak_1993
chr10	80602637	80603174	cr_wt.0.01_peak_1994
chr10	80621420	80622933	cr_wt.0.01_peak_1995
chr10	80655805	80656646	cr_wt.0.01_peak_1996
chr10	80659078	80659283	cr_wt.0.01_peak_1997
chr10	80675820	80676957	cr_wt.0.01_peak_1998
chr10	80701180	80702859	cr_wt.0.01_peak_1999
chr10	80741907	80742806	cr_wt.0.01_peak_2000
chr10	80797986	80798856	cr_wt.0.01_peak_2001
chr10	80807344	80807550	cr_wt.0.01_peak_2002
chr10	80825875	80827045	cr_wt.0.01_peak_2003
chr10	80900284	80901898	cr_wt.0.01_peak_2004
chr10	80917988	80918706	cr_wt.0.01_peak_2005
chr10	80928830	80929157	cr_wt.0.01_peak_2006
chr10	80929569	80930004	cr_wt.0.01_peak_2007
chr10	81036877	81037403	cr_wt.0.01_peak_2008
chr10	81059611	81060636	cr_wt.0.01_peak_2009
chr10	81069945	81070411	cr_wt.0.01_peak_2010
chr10	81105407	81106236	cr_wt.0.01_peak_2011
chr10	81137306	81137890	cr_wt.0.01_peak_2012
chr10	81138057	81138256	cr_wt.0.01_peak_2013
chr10	81167808	81168465	cr_wt.0.01_peak_2014
chr10	81175884	81176879	cr_wt.0.01_peak_2015
chr10	81182997	81183277	cr_wt.0.01_peak_2016
chr10	81192456	81192840	cr_wt.0.01_peak_2017
chr10	81193168	81193485	cr_wt.0.01_peak_2018
chr10	81252943	81253232	cr_wt.0.01_peak_2019
[truncated: 18,305 more rows]

## Sheet: MYT1L_CR_E14_CTX_Peaks_Inter
1	4785951	4786423	wt_1.q.05_peak_1
1	6729405	6730617	wt_1.q.05_peak_4
1	7397488	7398304	wt_1.q.05_peak_7
1	16104108	16104967	wt_1.q.05_peak_12
1	32174812	32175289	wt_1.q.05_peak_28
1	38632080	38633253	wt_1.q.05_peak_40
1	45795115	45795503	wt_1.q.05_peak_55
1	47961241	47962878	wt_1.q.05_peak_58
1	54707596	54708000	wt_1.q.05_peak_69
1	55886505	55887135	wt_1.q.05_peak_74
1	56965896	56966302	wt_1.q.05_peak_78
1	64690659	64691253	wt_1.q.05_peak_101
1	82787688	82788541	wt_1.q.05_peak_128
1	93342909	93343546	wt_1.q.05_peak_140
1	93478222	93478908	wt_1.q.05_peak_141
1	118389018	118389312	wt_1.q.05_peak_150
1	128102389	128103818	wt_1.q.05_peak_156
1	131526987	131527781	wt_1.q.05_peak_158
1	137898535	137899483	wt_1.q.05_peak_171
1	137900068	137901139	wt_1.q.05_peak_172
1	143640555	143641496	wt_1.q.05_peak_175
1	153641721	153642649	wt_1.q.05_peak_191
1	160278007	160279030	wt_1.q.05_peak_204
1	165460612	165461497	wt_1.q.05_peak_216
1	168431753	168433096	wt_1.q.05_peak_223
1	176813748	176815091	wt_1.q.05_peak_233
1	176877621	176879129	wt_1.q.05_peak_234
1	176930208	176931171	wt_1.q.05_peak_236
1	176932975	176934136	wt_1.q.05_peak_237
1	176946506	176947110	wt_1.q.05_peak_238
1	176994380	176995469	wt_1.q.05_peak_240
1	176996349	176997171	wt_1.q.05_peak_241
1	177038841	177040042	wt_1.q.05_peak_242
1	177150126	177151205	wt_1.q.05_peak_243
1	177444101	177445099	wt_1.q.05_peak_247
1	177459204	177460436	wt_1.q.05_peak_249
1	178318035	178319077	wt_1.q.05_peak_253
1	178337849	178338328	wt_1.q.05_peak_255
1	191575010	191576185	wt_1.q.05_peak_277
10	5805091	5805994	wt_1.q.05_peak_284
10	13965026	13966073	wt_1.q.05_peak_293
10	17722435	17723152	wt_1.q.05_peak_298
10	18403952	18404857	wt_1.q.05_peak_301
10	18527494	18528535	wt_1.q.05_peak_303
10	19471394	19472318	wt_1.q.05_peak_306
10	20312151	20313029	wt_1.q.05_peak_310
10	29143151	29143930	wt_1.q.05_peak_314
10	37138583	37140257	wt_1.q.05_peak_329
10	40257396	40259129	wt_1.q.05_peak_330
10	42276841	42278279	wt_1.q.05_peak_339
10	43023379	43024088	wt_1.q.05_peak_342
10	59322918	59323872	wt_1.q.05_peak_365
10	76442093	76442726	wt_1.q.05_peak_391
10	80148978	80149884	wt_1.q.05_peak_402
10	80825900	80826496	wt_1.q.05_peak_407
10	86705521	86706060	wt_1.q.05_peak_424
10	95035097	95035984	wt_1.q.05_peak_436
10	95117199	95117933	wt_1.q.05_peak_437
10	97313178	97314087	wt_1.q.05_peak_440
10	110192216	110193126	wt_1.q.05_peak_453
10	115384482	115384931	wt_1.q.05_peak_461
10	123196323	123197361	wt_1.q.05_peak_472
10	127069771	127070347	wt_1.q.05_peak_477
11	20332898	20333191	wt_1.q.05_peak_510
11	23666061	23666580	wt_1.q.05_peak_519
11	24370501	24371513	wt_1.q.05_peak_524
11	25715448	25716247	wt_1.q.05_peak_527
11	26585583	26587591	wt_1.q.05_peak_533
11	29547577	29548179	wt_1.q.05_peak_537
11	29692295	29694471	wt_1.q.05_peak_538
11	32157621	32158502	wt_1.q.05_peak_544
11	36169007	36169802	wt_1.q.05_peak_550
11	37153860	37154621	wt_1.q.05_peak_552
11	37235986	37236635	wt_1.q.05_peak_553
11	38728961	38730506	wt_1.q.05_peak_557
11	45955017	45955550	wt_1.q.05_peak_562
11	48817028	48817683	wt_1.q.05_peak_563
11	57521713	57522712	wt_1.q.05_peak_583
11	60537203	60538025	wt_1.q.05_peak_590
11	61174531	61175111	wt_1.q.05_peak_592
11	69395456	69396096	wt_1.q.05_peak_611
11	70970094	70970500	wt_1.q.05_peak_629
11	75460596	75461489	wt_1.q.05_peak_642
11	77981957	77982712	wt_1.q.05_peak_653
11	86356159	86356922	wt_1.q.05_peak_675
11	86544505	86545391	wt_1.q.05_peak_676
11	87108679	87109766	wt_1.q.05_peak_680
11	95309431	95310288	wt_1.q.05_peak_693
11	101552080	101553062	wt_1.q.05_peak_722
11	103115612	103116591	wt_1.q.05_peak_733
11	103697112	103697980	wt_1.q.05_peak_734
11	106216497	106216917	wt_1.q.05_peak_740
11	106788683	106789111	wt_1.q.05_peak_742
11	110398894	110399400	wt_1.q.05_peak_746
11	116198805	116199086	wt_1.q.05_peak_756
11	116853300	116853609	wt_1.q.05_peak_757
11	117508530	117509051	wt_1.q.05_peak_760
11	120572900	120573415	wt_1.q.05_peak_771
11	121236693	121237640	wt_1.q.05_peak_772
12	6417531	6418385	wt_1.q.05_peak_784
12	12253715	12254552	wt_1.q.05_peak_793
12	12273777	12274580	wt_1.q.05_peak_794
12	27062664	27063248	wt_1.q.05_peak_814
12	27342118	27343426	wt_1.q.05_peak_817
12	27838749	27839284	wt_1.q.05_peak_818
12	31948787	31950887	wt_1.q.05_peak_834
12	36394808	36395711	wt_1.q.05_peak_838
12	40222826	40223586	wt_1.q.05_peak_840
12	44209921	44210602	wt_1.q.05_peak_842
12	44899103	44899840	wt_1.q.05_peak_844
12	49376857	49378677	wt_1.q.05_peak_847
12	49395355	49397352	wt_1.q.05_peak_854
12	49401790	49403354	wt_1.q.05_peak_856
12	49482015	49483135	wt_1.q.05_peak_857
12	49483672	49484016	wt_1.q.05_peak_858
12	49758196	49759607	wt_1.q.05_peak_860
12	49836041	49836853	wt_1.q.05_peak_861
12	49945649	49946077	wt_1.q.05_peak_862
12	49951390	49952210	wt_1.q.05_peak_864
12	49953033	49953646	wt_1.q.05_peak_865
12	50080967	50082257	wt_1.q.05_peak_867
12	50084138	50085146	wt_1.q.05_peak_869
12	50110744	50112724	wt_1.q.05_peak_871
12	50597897	50598740	wt_1.q.05_peak_880
12	51828188	51828620	wt_1.q.05_peak_886
12	52603818	52605106	wt_1.q.05_peak_888
12	54695583	54697087	wt_1.q.05_peak_890
12	70038680	70039929	wt_1.q.05_peak_908
12	70040909	70041242	wt_1.q.05_peak_909
12	72760436	72761052	wt_1.q.05_peak_915
12	78226220	78226518	wt_1.q.05_peak_922
12	79296432	79296731	wt_1.q.05_peak_923
12	84451130	84451544	wt_1.q.05_peak_939
12	84772613	84773734	wt_1.q.05_peak_941
12	86894565	86895028	wt_1.q.05_peak_948
12	95694594	95696019	wt_1.q.05_peak_963
12	97397662	97398386	wt_1.q.05_peak_965
12	118301140	118301955	wt_1.q.05_peak_1001
13	11268637	11269571	wt_1.q.05_peak_1007
13	12394835	12395641	wt_1.q.05_peak_1009
13	19395884	19396203	wt_1.q.05_peak_1020
13	23516420	23518528	wt_1.q.05_peak_1037
13	23531084	23531677	wt_1.q.05_peak_1040
13	23542916	23544360	wt_1.q.05_peak_1041
13	23683421	23684592	wt_1.q.05_peak_1046
13	24800596	24801788	wt_1.q.05_peak_1050
13	25665228	25666140	wt_1.q.05_peak_1052
13	28720222	28721297	wt_1.q.05_peak_1056
13	28948317	28948879	wt_1.q.05_peak_1058
13	28953379	28954275	wt_1.q.05_peak_1060
13	29273526	29274430	wt_1.q.05_peak_1062
13	34129937	34132289	wt_1.q.05_peak_1070
13	34153866	34154963	wt_1.q.05_peak_1072
13	34874228	34874736	wt_1.q.05_peak_1073
13	35905913	35906735	wt_1.q.05_peak_1074
13	36734527	36735252	wt_1.q.05_peak_1076
13	37969581	37970094	wt_1.q.05_peak_1079
13	44730287	44731301	wt_1.q.05_peak_1085
13	46363614	46364137	wt_1.q.05_peak_1088
13	48545217	48546566	wt_1.q.05_peak_1094
13	56697381	56699018	wt_1.q.05_peak_1108
13	63431212	63431626	wt_1.q.05_peak_1115
13	76018003	76018629	wt_1.q.05_peak_1129
13	77047264	77049153	wt_1.q.05_peak_1132
13	78200187	78202214	wt_1.q.05_peak_1136
13	80883420	80886414	wt_1.q.05_peak_1142
13	81783228	81784232	wt_1.q.05_peak_1144
13	82392756	82393303	wt_1.q.05_peak_1149
13	83518081	83518696	wt_1.q.05_peak_1151
13	83523806	83524891	wt_1.q.05_peak_1152
13	83536552	83537916	wt_1.q.05_peak_1153
13	83655058	83657145	wt_1.q.05_peak_1154
13	83714249	83715919	wt_1.q.05_peak_1156
13	83722289	83722828	wt_1.q.05_peak_1160
13	83735864	83736964	wt_1.q.05_peak_1161
13	83738424	83738846	wt_1.q.05_peak_1163
13	83739887	83741238	wt_1.q.05_peak_1164
13	83744599	83745168	wt_1.q.05_peak_1166
13	83984741	83985483	wt_1.q.05_peak_1171
13	84054993	84056338	wt_1.q.05_peak_1174
13	84062337	84063237	wt_1.q.05_peak_1176
13	84343955	84345432	wt_1.q.05_peak_1179
13	84347878	84348988	wt_1.q.05_peak_1180
13	84749827	84752514	wt_1.q.05_peak_1182
13	84758224	84759353	wt_1.q.05_peak_1183
13	84760008	84761412	wt_1.q.05_peak_1184
13	84905594	84906010	wt_1.q.05_peak_1186
13	85288977	85289650	wt_1.q.05_peak_1188
13	91371133	91371430	wt_1.q.05_peak_1193
13	103773601	103774588	wt_1.q.05_peak_1214
14	11640259	11641198	wt_1.q.05_peak_1245
14	12199864	12200541	wt_1.q.05_peak_1249
14	12345462	12346093	wt_1.q.05_peak_1252
14	14012658	14013003	wt_1.q.05_peak_1257
14	18238146	18239012	wt_1.q.05_peak_1260
14	19986878	19987643	wt_1.q.05_peak_1265
14	21500150	21500920	wt_1.q.05_peak_1272
14	31018828	31019517	wt_1.q.05_peak_1287
14	37134966	37136083	wt_1.q.05_peak_1297
14	50930505	50931495	wt_1.q.05_peak_1309
14	51883885	51884439	wt_1.q.05_peak_1312
14	54686271	54686722	wt_1.q.05_peak_1315
14	55591175	55591544	wt_1.q.05_peak_1322
14	64313100	64314203	wt_1.q.05_peak_1342
14	64417590	64418335	wt_1.q.05_peak_1343
14	64949518	64950333	wt_1.q.05_peak_1345
14	76432264	76433052	wt_1.q.05_peak_1361
14	78204256	78204629	wt_1.q.05_peak_1366
14	86832945	86833439	wt_1.q.05_peak_1379
14	93450776	93452024	wt_1.q.05_peak_1386
14	120477487	120478255	wt_1.q.05_peak_1413
15	13283955	13285716	wt_1.q.05_peak_1429
15	21179788	21180488	wt_1.q.05_peak_1432
15	25983799	25984616	wt_1.q.05_peak_1434
15	28917465	28919976	wt_1.q.05_peak_1442
15	31601839	31602573	wt_1.q.05_peak_1446
15	44428016	44428694	wt_1.q.05_peak_1465
15	59054989	59055271	wt_1.q.05_peak_1485
15	66314142	66314845	wt_1.q.05_peak_1494
15	66476114	66476681	wt_1.q.05_peak_1495
15	75616249	75616947	wt_1.q.05_peak_1508
15	76351287	76351674	wt_1.q.05_peak_1513
15	80710742	80711523	wt_1.q.05_peak_1532
15	80798303	80798871	wt_1.q.05_peak_1533
15	82345776	82346585	wt_1.q.05_peak_1542
15	98953829	98954403	wt_1.q.05_peak_1573
15	98993517	98993809	wt_1.q.05_peak_1576
15	103239344	103241387	wt_1.q.05_peak_1594
16	6042629	6043476	wt_1.q.05_peak_1603
16	23517784	23519679	wt_1.q.05_peak_1633
16	29657625	29658027	wt_1.q.05_peak_1639
16	30064909	30065754	wt_1.q.05_peak_1640
16	38088730	38089427	wt_1.q.05_peak_1661
16	42875098	42876314	wt_1.q.05_peak_1665
16	43889452	43890177	wt_1.q.05_peak_1667
16	44138921	44139688	wt_1.q.05_peak_1668
16	49699160	49699455	wt_1.q.05_peak_1674
16	51759070	51759424	wt_1.q.05_peak_1678
16	52030477	52032293	wt_1.q.05_peak_1680
16	54090619	54092815	wt_1.q.05_peak_1684
16	54246563	54247623	wt_1.q.05_peak_1688
16	54406392	54407424	wt_1.q.05_peak_1690
16	57121390	57122003	wt_1.q.05_peak_1698
16	72500690	72501798	wt_1.q.05_peak_1715
16	73107745	73108333	wt_1.q.05_peak_1720
16	77499500	77501289	wt_1.q.05_peak_1728
16	77593918	77595471	wt_1.q.05_peak_1730
16	84835049	84835629	wt_1.q.05_peak_1738
16	87354178	87354555	wt_1.q.05_peak_1741
16	88408231	88408612	wt_1.q.05_peak_1744
16	91728656	91729220	wt_1.q.05_peak_1752
16	96843387	96844161	wt_1.q.05_peak_1760
17	17624723	17625301	wt_1.q.05_peak_1788
17	24478811	24479391	wt_1.q.05_peak_1796
17	24527623	24528230	wt_1.q.05_peak_1797
17	25273377	25274282	wt_1.q.05_peak_1800
17	26508642	26509129	wt_1.q.05_peak_1802
17	34897491	34898132	wt_1.q.05_peak_1826
17	35165003	35165690	wt_1.q.05_peak_1830
17	35916109	35917156	wt_1.q.05_peak_1837
17	45573344	45573820	wt_1.q.05_peak_1848
17	47502022	47502397	wt_1.q.05_peak_1856
17	48409246	48410113	wt_1.q.05_peak_1859
17	56079098	56079405	wt_1.q.05_peak_1867
17	56256116	56256578	wt_1.q.05_peak_1868
17	57031630	57032076	wt_1.q.05_peak_1873
17	84957227	84958026	wt_1.q.05_peak_1892
17	90088357	90088895	wt_1.q.05_peak_1899
18	5334589	5334941	wt_1.q.05_peak_1902
18	13305187	13306276	wt_1.q.05_peak_1913
18	21000950	21001744	wt_1.q.05_peak_1920
18	27530411	27530850	wt_1.q.05_peak_1926
18	31634272	31634884	wt_1.q.05_peak_1934
18	33463247	33465035	wt_1.q.05_peak_1944
18	39491019	39491970	wt_1.q.05_peak_1964
18	49755167	49755912	wt_1.q.05_peak_1976
18	54990268	54991459	wt_1.q.05_peak_1988
18	55546642	55548688	wt_1.q.05_peak_1993
18	67535934	67537127	wt_1.q.05_peak_2013
18	69344050	69345010	wt_1.q.05_peak_2017
18	69499291	69499800	wt_1.q.05_peak_2020
18	69500232	69502628	wt_1.q.05_peak_2021
18	69577296	69578313	wt_1.q.05_peak_2024
18	69592909	69594106	wt_1.q.05_peak_2027
18	84242637	84243212	wt_1.q.05_peak_2043
18	84951652	84952291	wt_1.q.05_peak_2045
19	4096881	4097207	wt_1.q.05_peak_2047
19	4755765	4756357	wt_1.q.05_peak_2049
19	4793747	4794316	wt_1.q.05_peak_2050
19	5489392	5489975	wt_1.q.05_peak_2054
19	6046497	6047068	wt_1.q.05_peak_2060
19	6951058	6951685	wt_1.q.05_peak_2066
19	8802146	8802921	wt_1.q.05_peak_2074
19	8819004	8819896	wt_1.q.05_peak_2075
19	12011192	12012745	wt_1.q.05_peak_2085
19	12795793	12796132	wt_1.q.05_peak_2086
19	26747758	26749024	wt_1.q.05_peak_2101
19	40588702	40589460	wt_1.q.05_peak_2116
19	53943996	53944599	wt_1.q.05_peak_2147
2	6870803	6871275	wt_1.q.05_peak_2169
2	7088660	7090040	wt_1.q.05_peak_2171
2	8467293	8467949	wt_1.q.05_peak_2179
2	8470213	8470718	wt_1.q.05_peak_2180
2	11777528	11778433	wt_1.q.05_peak_2181
2	23156043	23156502	wt_1.q.05_peak_2200
2	30237219	30238227	wt_1.q.05_peak_2210
2	32395462	32396290	wt_1.q.05_peak_2218
2	32451552	32452192	wt_1.q.05_peak_2219
2	34870488	34871697	wt_1.q.05_peak_2224
2	38926453	38926863	wt_1.q.05_peak_2235
2	41669338	41670244	wt_1.q.05_peak_2238
2	43949373	43950308	wt_1.q.05_peak_2242
2	43989603	43990915	wt_1.q.05_peak_2244
2	44028871	44029953	wt_1.q.05_peak_2245
2	44299419	44300572	wt_1.q.05_peak_2246
2	44309684	44311463	wt_1.q.05_peak_2248
2	44340511	44341542	wt_1.q.05_peak_2249
2	44979261	44979744	wt_1.q.05_peak_2253
2	45108567	45108877	wt_1.q.05_peak_2254
2	50044666	50045715	wt_1.q.05_peak_2261
2	53191104	53192605	wt_1.q.05_peak_2267
2	53710969	53711729	wt_1.q.05_peak_2269
2	61655586	61656395	wt_1.q.05_peak_2286
2	61663441	61664133	wt_1.q.05_peak_2288
2	61795147	61795749	wt_1.q.05_peak_2290
2	63452558	63453181	wt_1.q.05_peak_2297
2	65833228	65833763	wt_1.q.05_peak_2301
2	84715068	84716091	wt_1.q.05_peak_2326
2	84887523	84888294	wt_1.q.05_peak_2329
2	97466413	97466983	wt_1.q.05_peak_2345
2	103484909	103485610	wt_1.q.05_peak_2350
2	116066201	116067270	wt_1.q.05_peak_2370
2	136890921	136892089	wt_1.q.05_peak_2407
2	143914685	143915413	wt_1.q.05_peak_2416
2	147012868	147013635	wt_1.q.05_peak_2427
2	154583842	154584423	wt_1.q.05_peak_2441
3	10684665	10686290	wt_1.q.05_peak_2491
3	10891945	10892576	wt_1.q.05_peak_2492
3	18714155	18716296	wt_1.q.05_peak_2505
3	18743409	18744394	wt_1.q.05_peak_2507
3	20985989	20986557	wt_1.q.05_peak_2514
3	22076680	22077661	wt_1.q.05_peak_2518
3	37419950	37420491	wt_1.q.05_peak_2541
3	38884136	38885204	wt_1.q.05_peak_2542
3	41083116	41083877	wt_1.q.05_peak_2550
3	47863518	47864372	wt_1.q.05_peak_2559
3	61363817	61364388	wt_1.q.05_peak_2589
3	65217755	65218304	wt_1.q.05_peak_2591
3	65974266	65975536	wt_1.q.05_peak_2593
3	66398436	66398900	wt_1.q.05_peak_2594
3	67773358	67774429	wt_1.q.05_peak_2596
3	68072050	68072637	wt_1.q.05_peak_2598
3	70104339	70104920	wt_1.q.05_peak_2603
3	70873671	70874714	wt_1.q.05_peak_2607
3	75556977	75558325	wt_1.q.05_peak_2608
3	81025650	81026220	wt_1.q.05_peak_2615
3	89337609	89338468	wt_1.q.05_peak_2641
3	89418533	89418890	wt_1.q.05_peak_2642
3	89659843	89660759	wt_1.q.05_peak_2646
3	95819339	95819835	wt_1.q.05_peak_2658
3	95928646	95929828	wt_1.q.05_peak_2659
3	96629684	96630254	wt_1.q.05_peak_2667
3	99140800	99141663	wt_1.q.05_peak_2671
3	103020285	103021059	wt_1.q.05_peak_2677
3	107333055	107333912	wt_1.q.05_peak_2683
3	108562593	108563492	wt_1.q.05_peak_2692
3	136969930	136970409	wt_1.q.05_peak_2729
3	137560833	137561545	wt_1.q.05_peak_2731
3	138142822	138144198	wt_1.q.05_peak_2733
3	149550242	149551351	wt_1.q.05_peak_2752
3	151410945	151411820	wt_1.q.05_peak_2755
4	8850562	8851352	wt_1.q.05_peak_2773
4	12538265	12539338	wt_1.q.05_peak_2778
4	13145114	13145884	wt_1.q.05_peak_2780
4	13206722	13207426	wt_1.q.05_peak_2782
4	13286133	13287106	wt_1.q.05_peak_2784
4	13600285	13601130	wt_1.q.05_peak_2788
4	20517915	20518906	wt_1.q.05_peak_2795
4	21847629	21848702	wt_1.q.05_peak_2796
4	23832478	23833204	wt_1.q.05_peak_2798
4	27855999	27856448	wt_1.q.05_peak_2803
4	28812524	28812982	wt_1.q.05_peak_2804
4	40269514	40270327	wt_1.q.05_peak_2822
4	44756032	44756698	wt_1.q.05_peak_2835
4	47933669	47934301	wt_1.q.05_peak_2846
4	49631567	49632286	wt_1.q.05_peak_2849
4	53896299	53896619	wt_1.q.05_peak_2851
4	69538080	69538798	wt_1.q.05_peak_2862
4	72201021	72202246	wt_1.q.05_peak_2865
4	72328427	72329211	wt_1.q.05_peak_2866
4	72524043	72524757	wt_1.q.05_peak_2868
4	75561709	75562613	wt_1.q.05_peak_2871
4	81565856	81566847	wt_1.q.05_peak_2878
4	81567930	81568729	wt_1.q.05_peak_2879
4	82493032	82493603	wt_1.q.05_peak_2884
4	82494586	82497184	wt_1.q.05_peak_2885
4	82505323	82506530	wt_1.q.05_peak_2887
4	82507369	82507919	wt_1.q.05_peak_2888
4	82945754	82946939	wt_1.q.05_peak_2895
4	87928941	87929651	wt_1.q.05_peak_2906
4	91375401	91376929	wt_1.q.05_peak_2913
4	95051667	95052782	wt_1.q.05_peak_2915
4	96968909	96969877	wt_1.q.05_peak_2919
4	96979902	96980498	wt_1.q.05_peak_2920
4	97236061	97237095	wt_1.q.05_peak_2922
4	97609684	97610881	wt_1.q.05_peak_2927
4	97772439	97773833	wt_1.q.05_peak_2931
4	97774689	97775573	wt_1.q.05_peak_2932
4	97776909	97780265	wt_1.q.05_peak_2933
4	97868623	97869587	wt_1.q.05_peak_2934
4	97910181	97911555	wt_1.q.05_peak_2936
4	97924038	97924823	wt_1.q.05_peak_2937
4	104113314	104114076	wt_1.q.05_peak_2953
4	116220763	116222298	wt_1.q.05_peak_2969
4	116557158	116557494	wt_1.q.05_peak_2971
4	118179521	118180391	wt_1.q.05_peak_2977
4	133756967	133757562	wt_1.q.05_peak_3022
4	135855621	135856437	wt_1.q.05_peak_3029
4	136285530	136285980	wt_1.q.05_peak_3032
5	16134157	16134907	wt_1.q.05_peak_3075
5	23434038	23434820	wt_1.q.05_peak_3086
5	24842546	24842990	wt_1.q.05_peak_3088
5	46202029	46203081	wt_1.q.05_peak_3119
5	48372376	48372796	wt_1.q.05_peak_3121
5	82898185	82898795	wt_1.q.05_peak_3162
5	85345957	85347207	wt_1.q.05_peak_3173
5	85571488	85572857	wt_1.q.05_peak_3174
5	88764794	88765506	wt_1.q.05_peak_3178
5	93267128	93268496	wt_1.q.05_peak_3182
5	97641371	97642331	wt_1.q.05_peak_3184
5	100038140	100038776	wt_1.q.05_peak_3192
5	107497492	107497992	wt_1.q.05_peak_3202
5	111003473	111004217	wt_1.q.05_peak_3211
5	115157981	115158777	wt_1.q.05_peak_3219
5	116589932	116590691	wt_1.q.05_peak_3226
5	124327647	124328213	wt_1.q.05_peak_3248
5	124354750	124355456	wt_1.q.05_peak_3250
5	131794238	131795558	wt_1.q.05_peak_3264
5	131963513	131963832	wt_1.q.05_peak_3265
5	134688457	134689164	wt_1.q.05_peak_3277
5	135008660	135009954	wt_1.q.05_peak_3278
5	135186847	135187148	wt_1.q.05_peak_3279
5	137786032	137786740	wt_1.q.05_peak_3286
5	138170613	138172387	wt_1.q.05_peak_3289
5	138619326	138620112	wt_1.q.05_peak_3292
5	140830012	140830877	wt_1.q.05_peak_3297
6	4086635	4087334	wt_1.q.05_peak_3314
6	4752001	4752531	wt_1.q.05_peak_3315
6	13870837	13871609	wt_1.q.05_peak_3321
6	14900702	14901848	wt_1.q.05_peak_3325
6	33525130	33526540	wt_1.q.05_peak_3344
6	39592607	39592950	wt_1.q.05_peak_3359
6	47231009	47231881	wt_1.q.05_peak_3366
6	47812991	47813953	wt_1.q.05_peak_3368
6	51469272	51470383	wt_1.q.05_peak_3384
6	51848781	51849818	wt_1.q.05_peak_3386
6	55646182	55647940	wt_1.q.05_peak_3396
6	55791781	55792970	wt_1.q.05_peak_3400
6	58898899	58899589	wt_1.q.05_peak_3409
6	71632739	71633585	wt_1.q.05_peak_3420
6	80866054	80866441	wt_1.q.05_peak_3435
6	85450895	85451941	wt_1.q.05_peak_3446
6	86403475	86404509	wt_1.q.05_peak_3448
6	86438386	86438874	wt_1.q.05_peak_3449
6	97616719	97617388	wt_1.q.05_peak_3462
6	117254743	117255048	wt_1.q.05_peak_3486
6	122811088	122811503	wt_1.q.05_peak_3492
6	124829157	124830072	wt_1.q.05_peak_3494
6	125039115	125040254	wt_1.q.05_peak_3496
6	136547867	136549006	wt_1.q.05_peak_3515
6	136803661	136804773	wt_1.q.05_peak_3516
6	144207167	144209033	wt_1.q.05_peak_3524
6	144322154	144322857	wt_1.q.05_peak_3526
6	144418940	144419935	wt_1.q.05_peak_3528
6	144452035	144452914	wt_1.q.05_peak_3529
6	144472271	144472796	wt_1.q.05_peak_3530
6	145341071	145341915	wt_1.q.05_peak_3533
6	148571572	148572391	wt_1.q.05_peak_3535
7	15945443	15946081	wt_1.q.05_peak_3562
7	16399585	16400007	wt_1.q.05_peak_3565
7	24884129	24884489	wt_1.q.05_peak_3584
7	25237901	25238199	wt_1.q.05_peak_3586
7	25267389	25268308	wt_1.q.05_peak_3587
7	27195626	27196802	wt_1.q.05_peak_3592
7	28178878	28180160	wt_1.q.05_peak_3596
7	28810140	28811442	wt_1.q.05_peak_3602
7	30089808	30090906	wt_1.q.05_peak_3611
7	30551855	30552766	wt_1.q.05_peak_3618
7	44815762	44816260	wt_1.q.05_peak_3638
7	44894981	44896319	wt_1.q.05_peak_3641
7	44986503	44987218	wt_1.q.05_peak_3642
7	66689694	66690395	wt_1.q.05_peak_3667
7	70361499	70362206	wt_1.q.05_peak_3673
7	73537661	73538469	wt_1.q.05_peak_3676
7	73607010	73607993	wt_1.q.05_peak_3679
7	75455208	75456207	wt_1.q.05_peak_3682
7	91208351	91208799	wt_1.q.05_peak_3704
7	95253936	95254991	wt_1.q.05_peak_3708
7	96786456	96786796	wt_1.q.05_peak_3710
7	97345372	97345823	wt_1.q.05_peak_3714
7	97914668	97915699	wt_1.q.05_peak_3717
7	98361035	98361793	wt_1.q.05_peak_3718
7	100372153	100372886	wt_1.q.05_peak_3724
7	100706281	100706570	wt_1.q.05_peak_3725
7	101191632	101192120	wt_1.q.05_peak_3728
7	101970195	101971005	wt_1.q.05_peak_3731
7	110061525	110061926	wt_1.q.05_peak_3741
7	122066845	122067333	wt_1.q.05_peak_3764
7	127477754	127478766	wt_1.q.05_peak_3777
7	127588207	127588913	wt_1.q.05_peak_3779
7	127745204	127746261	wt_1.q.05_peak_3780
7	127967210	127968032	wt_1.q.05_peak_3782
7	128237285	128238813	wt_1.q.05_peak_3783
8	4677455	4678437	wt_1.q.05_peak_3811
8	7397214	7397927	wt_1.q.05_peak_3812
8	8661019	8662364	wt_1.q.05_peak_3819
8	11555488	11555908	wt_1.q.05_peak_3822
8	26244053	26244473	wt_1.q.05_peak_3841
8	33731595	33732507	wt_1.q.05_peak_3854
8	45627458	45628042	wt_1.q.05_peak_3869
8	54991825	54992682	wt_1.q.05_peak_3877
8	55001590	55003101	wt_1.q.05_peak_3878
8	57487263	57487818	wt_1.q.05_peak_3883
8	60983457	60983742	wt_1.q.05_peak_3888
8	70538942	70539551	wt_1.q.05_peak_3901
8	71487862	71488626	wt_1.q.05_peak_3907
8	72239686	72240354	wt_1.q.05_peak_3910
8	81015073	81015530	wt_1.q.05_peak_3919
8	95080718	95081103	wt_1.q.05_peak_3947
8	95807664	95808081	wt_1.q.05_peak_3948
8	97431690	97432333	wt_1.q.05_peak_3952
8	105827364	105827764	wt_1.q.05_peak_3967
8	109251264	109252403	wt_1.q.05_peak_3973
8	116921026	116922202	wt_1.q.05_peak_3988
8	126593986	126594733	wt_1.q.05_peak_4009
9	3403398	3403790	wt_1.q.05_peak_4015
9	4309051	4310103	wt_1.q.05_peak_4016
9	13826406	13828259	wt_1.q.05_peak_4022
9	21955327	21956051	wt_1.q.05_peak_4036
9	23579981	23582152	wt_1.q.05_peak_4042
9	24185998	24187191	wt_1.q.05_peak_4043
9	24390855	24391420	wt_1.q.05_peak_4046
9	27030184	27030638	wt_1.q.05_peak_4050
9	36821425	36822185	wt_1.q.05_peak_4060
9	40800830	40801339	wt_1.q.05_peak_4062
9	41585976	41586691	wt_1.q.05_peak_4068
9	43700140	43700413	wt_1.q.05_peak_4074
9	46871259	46872040	wt_1.q.05_peak_4085
9	56418243	56419093	wt_1.q.05_peak_4105
9	57075897	57076673	wt_1.q.05_peak_4109
9	57560498	57561653	wt_1.q.05_peak_4111
9	82975463	82976063	wt_1.q.05_peak_4148
9	83487657	83488764	wt_1.q.05_peak_4151
9	94538250	94538547	wt_1.q.05_peak_4160
9	102038977	102039540	wt_1.q.05_peak_4173
9	102643766	102644490	wt_1.q.05_peak_4177
9	110656513	110656899	wt_1.q.05_peak_4210
9	113176710	113178004	wt_1.q.05_peak_4212
9	121277009	121277427	wt_1.q.05_peak_4223
X	150478008	150478495	wt_1.q.05_peak_4266

## Sheet: MYT1L_CR_PFC_Peaks_Merged
1	3094998	3095494	wt.q.01_peak_1
1	3119212	3121869	wt.q.01_peak_2
1	3204679	3204892	wt.q.01_peak_3
1	3205070	3205265	wt.q.01_peak_4
1	3211250	3211418	wt.q.01_peak_5
1	3237228	3237817	wt.q.01_peak_6
1	3264985	3265656	wt.q.01_peak_7
1	3292274	3293348	wt.q.01_peak_8
1	3297078	3298829	wt.q.01_peak_9
1	3299189	3300350	wt.q.01_peak_10
1	3309418	3310707	wt.q.01_peak_11
1	3321554	3322914	wt.q.01_peak_12
1	3324896	3325276	wt.q.01_peak_13
1	3329595	3330670	wt.q.01_peak_14
1	3360550	3360829	wt.q.01_peak_15
1	3366745	3366906	wt.q.01_peak_16
1	3369360	3369577	wt.q.01_peak_17
1	3385782	3386369	wt.q.01_peak_18
1	3388025	3389099	wt.q.01_peak_19
1	3391549	3392822	wt.q.01_peak_20
1	3399295	3400452	wt.q.01_peak_21
1	3405867	3407533	wt.q.01_peak_22
1	3407851	3408064	wt.q.01_peak_23
1	3410903	3411227	wt.q.01_peak_24
1	3432165	3434653	wt.q.01_peak_25
1	3441461	3441798	wt.q.01_peak_26
1	3456674	3456849	wt.q.01_peak_27
1	3457256	3458442	wt.q.01_peak_28
1	3494613	3495043	wt.q.01_peak_29
1	3511487	3511742	wt.q.01_peak_30
1	3651222	3651654	wt.q.01_peak_31
1	3662080	3662923	wt.q.01_peak_32
1	3666696	3672643	wt.q.01_peak_33
1	3709838	3710667	wt.q.01_peak_34
1	3899528	3901171	wt.q.01_peak_35
1	3902851	3904303	wt.q.01_peak_36
1	3909515	3909991	wt.q.01_peak_37
1	3972166	3972390	wt.q.01_peak_38
1	4068917	4069081	wt.q.01_peak_39
1	4089251	4090442	wt.q.01_peak_40
1	4138933	4139154	wt.q.01_peak_41
1	4139340	4139497	wt.q.01_peak_42
1	4186806	4187060	wt.q.01_peak_43
1	4392348	4392777	wt.q.01_peak_44
1	4414165	4415126	wt.q.01_peak_45
1	4747605	4748039	wt.q.01_peak_46
1	4768614	4769047	wt.q.01_peak_47
1	4784962	4786447	wt.q.01_peak_48
1	4807064	4809241	wt.q.01_peak_49
1	4856670	4859060	wt.q.01_peak_50
1	4868747	4869251	wt.q.01_peak_51
1	4873121	4874365	wt.q.01_peak_52
1	4907872	4908777	wt.q.01_peak_53
1	4923280	4923439	wt.q.01_peak_54
1	4926555	4927027	wt.q.01_peak_55
1	4934691	4935297	wt.q.01_peak_56
1	5015227	5015412	wt.q.01_peak_57
1	5015616	5015941	wt.q.01_peak_58
1	5017817	5020278	wt.q.01_peak_59
1	5021415	5023747	wt.q.01_peak_60
1	5070151	5071767	wt.q.01_peak_61
1	5082373	5084787	wt.q.01_peak_62
1	5103082	5103710	wt.q.01_peak_63
1	5127083	5129168	wt.q.01_peak_64
1	5129672	5130837	wt.q.01_peak_65
1	5133247	5134036	wt.q.01_peak_66
1	5134289	5135153	wt.q.01_peak_67
1	5138235	5138429	wt.q.01_peak_68
1	5140525	5140688	wt.q.01_peak_69
1	5159710	5160399	wt.q.01_peak_70
1	5176604	5178266	wt.q.01_peak_71
1	5178681	5178850	wt.q.01_peak_72
1	5208384	5208762	wt.q.01_peak_73
1	5249204	5249964	wt.q.01_peak_74
1	5297434	5298070	wt.q.01_peak_75
1	5315478	5316733	wt.q.01_peak_76
1	5334190	5335254	wt.q.01_peak_77
1	5336299	5337094	wt.q.01_peak_78
1	5378933	5379372	wt.q.01_peak_79
1	5381814	5383403	wt.q.01_peak_80
1	5394470	5395085	wt.q.01_peak_81
1	5753549	5753811	wt.q.01_peak_82
1	5915213	5915399	wt.q.01_peak_83
1	5955650	5955912	wt.q.01_peak_84
1	6094378	6094682	wt.q.01_peak_85
1	6212834	6213054	wt.q.01_peak_86
1	6213369	6216007	wt.q.01_peak_87
1	6216500	6216800	wt.q.01_peak_88
1	6219754	6220113	wt.q.01_peak_89
1	6221928	6222085	wt.q.01_peak_90
1	6223660	6225720	wt.q.01_peak_91
1	6272216	6272392	wt.q.01_peak_92
1	6283120	6283276	wt.q.01_peak_93
1	6482666	6484364	wt.q.01_peak_94
1	6547031	6547613	wt.q.01_peak_95
1	6678253	6678424	wt.q.01_peak_96
1	6717893	6718240	wt.q.01_peak_97
1	6729565	6730806	wt.q.01_peak_98
1	6732184	6732477	wt.q.01_peak_99
1	6769906	6770492	wt.q.01_peak_100
1	6810107	6810889	wt.q.01_peak_101
1	6824231	6824460	wt.q.01_peak_102
1	6824676	6824854	wt.q.01_peak_103
1	6866867	6867138	wt.q.01_peak_104
1	6907556	6907780	wt.q.01_peak_105
1	6928154	6928790	wt.q.01_peak_106
1	7086880	7087672	wt.q.01_peak_107
1	7087852	7091811	wt.q.01_peak_108
1	7102332	7102939	wt.q.01_peak_109
1	7104180	7105951	wt.q.01_peak_110
1	7112983	7113862	wt.q.01_peak_111
1	7117753	7118427	wt.q.01_peak_112
1	7131285	7131780	wt.q.01_peak_113
1	7132082	7132475	wt.q.01_peak_114
1	7137546	7139825	wt.q.01_peak_115
1	7141276	7141464	wt.q.01_peak_116
1	7148241	7148819	wt.q.01_peak_117
1	7154973	7156776	wt.q.01_peak_118
1	7157963	7158977	wt.q.01_peak_119
1	7160973	7161452	wt.q.01_peak_120
1	7204529	7205172	wt.q.01_peak_121
1	7219146	7219513	wt.q.01_peak_122
1	7393554	7393736	wt.q.01_peak_123
1	7394783	7394944	wt.q.01_peak_124
1	7396646	7398603	wt.q.01_peak_125
1	7534953	7535872	wt.q.01_peak_126
1	7548525	7549151	wt.q.01_peak_127
1	7750805	7751568	wt.q.01_peak_128
1	7769094	7769749	wt.q.01_peak_129
1	8410409	8410717	wt.q.01_peak_130
1	8410884	8411323	wt.q.01_peak_131
1	8582933	8583562	wt.q.01_peak_132
1	8676779	8677051	wt.q.01_peak_133
1	8679049	8679432	wt.q.01_peak_134
1	8780695	8782328	wt.q.01_peak_135
1	8867128	8868373	wt.q.01_peak_136
1	8921411	8922602	wt.q.01_peak_137
1	8944429	8945584	wt.q.01_peak_138
1	8948090	8948247	wt.q.01_peak_139
1	8998803	8999049	wt.q.01_peak_140
1	9024249	9024518	wt.q.01_peak_141
1	9090976	9091232	wt.q.01_peak_142
1	9125392	9128657	wt.q.01_peak_143
1	9128855	9129142	wt.q.01_peak_144
1	9171420	9173177	wt.q.01_peak_145
1	9253931	9254479	wt.q.01_peak_146
1	9258026	9258183	wt.q.01_peak_147
1	9288665	9290415	wt.q.01_peak_148
1	9294764	9300774	wt.q.01_peak_149
1	9544820	9545882	wt.q.01_peak_150
1	9547167	9548594	wt.q.01_peak_151
1	9548752	9549124	wt.q.01_peak_152
1	9570182	9570661	wt.q.01_peak_153
1	9573457	9573650	wt.q.01_peak_154
1	9577662	9578604	wt.q.01_peak_155
1	9591811	9592208	wt.q.01_peak_156
1	9600593	9604051	wt.q.01_peak_157
1	9604270	9604958	wt.q.01_peak_158
1	9606049	9606686	wt.q.01_peak_159
1	9608533	9609837	wt.q.01_peak_160
1	9610490	9610871	wt.q.01_peak_161
1	9615140	9616840	wt.q.01_peak_162
1	9619190	9620443	wt.q.01_peak_163
1	9626441	9629090	wt.q.01_peak_164
1	9629289	9631271	wt.q.01_peak_165
1	9645237	9646121	wt.q.01_peak_166
1	9673202	9674427	wt.q.01_peak_167
1	9696567	9697332	wt.q.01_peak_168
1	9699817	9701291	wt.q.01_peak_169
1	9720320	9720492	wt.q.01_peak_170
1	9728601	9729180	wt.q.01_peak_171
1	9741491	9741750	wt.q.01_peak_172
1	9742159	9742436	wt.q.01_peak_173
1	9743491	9743713	wt.q.01_peak_174
1	9744041	9746350	wt.q.01_peak_175
1	9747285	9749228	wt.q.01_peak_176
1	9749533	9749691	wt.q.01_peak_177
1	9772999	9773208	wt.q.01_peak_178
1	9789974	9790923	wt.q.01_peak_179
1	9797144	9797717	wt.q.01_peak_180
1	9798248	9799912	wt.q.01_peak_181
1	9800290	9801263	wt.q.01_peak_182
1	9804847	9805066	wt.q.01_peak_183
1	9806881	9807106	wt.q.01_peak_184
1	9812123	9812953	wt.q.01_peak_185
1	9815381	9816391	wt.q.01_peak_186
1	9823284	9824922	wt.q.01_peak_187
1	9847824	9849623	wt.q.01_peak_188
1	9907977	9909092	wt.q.01_peak_189
1	9935862	9936635	wt.q.01_peak_190
1	9942105	9942330	wt.q.01_peak_191
1	9942952	9944566	wt.q.01_peak_192
1	9991437	9992601	wt.q.01_peak_193
1	9993200	9994442	wt.q.01_peak_194
1	9994632	9995288	wt.q.01_peak_195
1	9996439	9996774	wt.q.01_peak_196
1	10008678	10009606	wt.q.01_peak_197
1	10012061	10013258	wt.q.01_peak_198
1	10019022	10019452	wt.q.01_peak_199
1	10037196	10040991	wt.q.01_peak_200
1	10057774	10058986	wt.q.01_peak_201
1	10089512	10089695	wt.q.01_peak_202
1	10089894	10090069	wt.q.01_peak_203
1	10093512	10094074	wt.q.01_peak_204
1	10126979	10127282	wt.q.01_peak_205
1	10132675	10132933	wt.q.01_peak_206
1	10133322	10133666	wt.q.01_peak_207
1	10141204	10142288	wt.q.01_peak_208
1	10150728	10151562	wt.q.01_peak_209
1	10156983	10157814	wt.q.01_peak_210
1	10164352	10165790	wt.q.01_peak_211
1	10169688	10169977	wt.q.01_peak_212
1	10193155	10193684	wt.q.01_peak_213
1	10228721	10232188	wt.q.01_peak_214
1	10232681	10232893	wt.q.01_peak_215
1	10233078	10233906	wt.q.01_peak_216
1	10247335	10247768	wt.q.01_peak_217
1	10247930	10248085	wt.q.01_peak_218
1	10486633	10487010	wt.q.01_peak_219
1	10570673	10571389	wt.q.01_peak_220
1	10596261	10597070	wt.q.01_peak_221
1	10699634	10701491	wt.q.01_peak_222
1	10719325	10721077	wt.q.01_peak_223
1	10725963	10726148	wt.q.01_peak_224
1	10759834	10759997	wt.q.01_peak_225
1	10778265	10778434	wt.q.01_peak_226
1	10835636	10836225	wt.q.01_peak_227
1	10871207	10872181	wt.q.01_peak_228
1	10872596	10872842	wt.q.01_peak_229
1	10874392	10874725	wt.q.01_peak_230
1	10993050	10994100	wt.q.01_peak_231
1	11065369	11065616	wt.q.01_peak_232
1	11099706	11100014	wt.q.01_peak_233
1	11116859	11117902	wt.q.01_peak_234
1	11168753	11170301	wt.q.01_peak_235
1	11179533	11180949	wt.q.01_peak_236
1	11181597	11181768	wt.q.01_peak_237
1	11204443	11204654	wt.q.01_peak_238
1	11217338	11217868	wt.q.01_peak_239
1	11231098	11231619	wt.q.01_peak_240
1	11246991	11247385	wt.q.01_peak_241
1	11267717	11268737	wt.q.01_peak_242
1	11320576	11320757	wt.q.01_peak_243
1	11406943	11407784	wt.q.01_peak_244
1	11413260	11418250	wt.q.01_peak_245
1	11426945	11428299	wt.q.01_peak_246
1	11432690	11433288	wt.q.01_peak_247
1	11446743	11447075	wt.q.01_peak_248
1	11458280	11458699	wt.q.01_peak_249
1	11526958	11527127	wt.q.01_peak_250
1	11545829	11546290	wt.q.01_peak_251
1	11549731	11550388	wt.q.01_peak_252
1	11565039	11567452	wt.q.01_peak_253
1	11573095	11574175	wt.q.01_peak_254
1	11577646	11578930	wt.q.01_peak_255
1	11579602	11581268	wt.q.01_peak_256
1	11588507	11589207	wt.q.01_peak_257
1	11595256	11595865	wt.q.01_peak_258
1	11627511	11627860	wt.q.01_peak_259
1	11649039	11649243	wt.q.01_peak_260
1	11650009	11650218	wt.q.01_peak_261
1	11650392	11650624	wt.q.01_peak_262
1	11652995	11653639	wt.q.01_peak_263
1	11657511	11658457	wt.q.01_peak_264
1	11660269	11660473	wt.q.01_peak_265
1	11739265	11740028	wt.q.01_peak_266
1	11740920	11741144	wt.q.01_peak_267
1	11750277	11751564	wt.q.01_peak_268
1	11764998	11765272	wt.q.01_peak_269
1	11783858	11784545	wt.q.01_peak_270
1	11895389	11896191	wt.q.01_peak_271
1	11936522	11937651	wt.q.01_peak_272
1	11977805	11977979	wt.q.01_peak_273
1	11979158	11980027	wt.q.01_peak_274
1	11988172	11988363	wt.q.01_peak_275
1	11996211	11996450	wt.q.01_peak_276
1	12008948	12009656	wt.q.01_peak_277
1	12010192	12011286	wt.q.01_peak_278
1	12029071	12029284	wt.q.01_peak_279
1	12031206	12031447	wt.q.01_peak_280
1	12115166	12116371	wt.q.01_peak_281
1	12117444	12117708	wt.q.01_peak_282
1	12282429	12282591	wt.q.01_peak_283
1	12307122	12307317	wt.q.01_peak_284
1	12309954	12310691	wt.q.01_peak_285
1	12345362	12346008	wt.q.01_peak_286
1	12366858	12369027	wt.q.01_peak_287
1	12405755	12405949	wt.q.01_peak_288
1	12419051	12419240	wt.q.01_peak_289
1	12452786	12453408	wt.q.01_peak_290
1	12476498	12476899	wt.q.01_peak_291
1	12488693	12489538	wt.q.01_peak_292
1	12510022	12510221	wt.q.01_peak_293
1	12510491	12510823	wt.q.01_peak_294
1	12518997	12520108	wt.q.01_peak_295
1	12526339	12527028	wt.q.01_peak_296
1	12527984	12529282	wt.q.01_peak_297
1	12555833	12556077	wt.q.01_peak_298
1	12619694	12621157	wt.q.01_peak_299
1	12623058	12623799	wt.q.01_peak_300
1	12658468	12658771	wt.q.01_peak_301
1	12691512	12692628	wt.q.01_peak_302
1	12692906	12694307	wt.q.01_peak_303
1	12706559	12707407	wt.q.01_peak_304
1	12717969	12719134	wt.q.01_peak_305
1	12763824	12765197	wt.q.01_peak_306
1	12770940	12771685	wt.q.01_peak_307
1	12833043	12833797	wt.q.01_peak_308
1	12836085	12837250	wt.q.01_peak_309
1	12863986	12864463	wt.q.01_peak_310
1	12877975	12878158	wt.q.01_peak_311
1	12973216	12973407	wt.q.01_peak_312
1	12990399	12993081	wt.q.01_peak_313
1	13170659	13170855	wt.q.01_peak_314
1	13187953	13189864	wt.q.01_peak_315
1	13194720	13195653	wt.q.01_peak_316
1	13195950	13197854	wt.q.01_peak_317
1	13217662	13218522	wt.q.01_peak_318
1	13251551	13252087	wt.q.01_peak_319
1	13255394	13255846	wt.q.01_peak_320
1	13288896	13289707	wt.q.01_peak_321
1	13292921	13293248	wt.q.01_peak_322
1	13295440	13295937	wt.q.01_peak_323
1	13298972	13300285	wt.q.01_peak_324
1	13302894	13303202	wt.q.01_peak_325
1	13305138	13306152	wt.q.01_peak_326
1	13307103	13307324	wt.q.01_peak_327
1	13313127	13314080	wt.q.01_peak_328
1	13320116	13320323	wt.q.01_peak_329
1	13335866	13336152	wt.q.01_peak_330
1	13357700	13358116	wt.q.01_peak_331
1	13366516	13367669	wt.q.01_peak_332
1	13370685	13371091	wt.q.01_peak_333
1	13371249	13374248	wt.q.01_peak_334
1	13374462	13375176	wt.q.01_peak_335
1	13425859	13426064	wt.q.01_peak_336
1	13567675	13567906	wt.q.01_peak_337
1	13573458	13575087	wt.q.01_peak_338
1	13588150	13589026	wt.q.01_peak_339
1	13589181	13589636	wt.q.01_peak_340
1	13590108	13590422	wt.q.01_peak_341
1	13599499	13599775	wt.q.01_peak_342
1	13657640	13658733	wt.q.01_peak_343
1	13659076	13660969	wt.q.01_peak_344
1	13752192	13753129	wt.q.01_peak_345
1	13789182	13789665	wt.q.01_peak_346
1	13864907	13865426	wt.q.01_peak_347
1	13869691	13871465	wt.q.01_peak_348
1	13938795	13938979	wt.q.01_peak_349
1	13998252	13998480	wt.q.01_peak_350
1	14009254	14009430	wt.q.01_peak_351
1	14100905	14101313	wt.q.01_peak_352
1	14108553	14109344	wt.q.01_peak_353
1	14144159	14144489	wt.q.01_peak_354
1	14150892	14151623	wt.q.01_peak_355
1	14184224	14185174	wt.q.01_peak_356
1	14203822	14204871	wt.q.01_peak_357
1	14208114	14208543	wt.q.01_peak_358
1	14233342	14234791	wt.q.01_peak_359
1	14244509	14245131	wt.q.01_peak_360
1	14262919	14263114	wt.q.01_peak_361
1	14308487	14310927	wt.q.01_peak_362
1	14385034	14385244	wt.q.01_peak_363
1	14403735	14404241	wt.q.01_peak_364
1	14556025	14556675	wt.q.01_peak_365
1	14754980	14756043	wt.q.01_peak_366
1	14904044	14904353	wt.q.01_peak_367
1	14997825	14998371	wt.q.01_peak_368
1	15007639	15008170	wt.q.01_peak_369
1	15179919	15180329	wt.q.01_peak_370
1	15182079	15182527	wt.q.01_peak_371
1	15286774	15290408	wt.q.01_peak_372
1	15292137	15293454	wt.q.01_peak_373
1	15294346	15294707	wt.q.01_peak_374
1	15307241	15308082	wt.q.01_peak_375
1	15320522	15320889	wt.q.01_peak_376
1	15358192	15358896	wt.q.01_peak_377
1	15406972	15407141	wt.q.01_peak_378
1	15423962	15424469	wt.q.01_peak_379
1	15473869	15474643	wt.q.01_peak_380
1	15480891	15482003	wt.q.01_peak_381
1	15482843	15484160	wt.q.01_peak_382
1	15550660	15551123	wt.q.01_peak_383
1	15570155	15570871	wt.q.01_peak_384
1	15616026	15616941	wt.q.01_peak_385
1	15621718	15622013	wt.q.01_peak_386
1	15648758	15649709	wt.q.01_peak_387
1	15651755	15651915	wt.q.01_peak_388
1	15652110	15652280	wt.q.01_peak_389
1	15657275	15657551	wt.q.01_peak_390
1	15657927	15658781	wt.q.01_peak_391
1	15675027	15675295	wt.q.01_peak_392
1	15677308	15678129	wt.q.01_peak_393
1	15682951	15684062	wt.q.01_peak_394
1	15709337	15709502	wt.q.01_peak_395
1	15709886	15710860	wt.q.01_peak_396
1	15725695	15726288	wt.q.01_peak_397
1	15770223	15771098	wt.q.01_peak_398
1	15776557	15777853	wt.q.01_peak_399
1	15778515	15778832	wt.q.01_peak_400
1	15779132	15779453	wt.q.01_peak_401
1	15805194	15807072	wt.q.01_peak_402
1	15818751	15818911	wt.q.01_peak_403
1	15819118	15819308	wt.q.01_peak_404
1	15847636	15848545	wt.q.01_peak_405
1	15850400	15851362	wt.q.01_peak_406
1	15943006	15944466	wt.q.01_peak_407
1	16091976	16092673	wt.q.01_peak_408
1	16103309	16105740	wt.q.01_peak_409
1	16106150	16106920	wt.q.01_peak_410
1	16201812	16202074	wt.q.01_peak_411
1	16255948	16256557	wt.q.01_peak_412
1	16256793	16257334	wt.q.01_peak_413
1	16257563	16258875	wt.q.01_peak_414
1	16260208	16260620	wt.q.01_peak_415
1	16294961	16295149	wt.q.01_peak_416
1	16362271	16362934	wt.q.01_peak_417
1	16400692	16400930	wt.q.01_peak_418
1	16440143	16440924	wt.q.01_peak_419
1	16488990	16489238	wt.q.01_peak_420
1	16513279	16513460	wt.q.01_peak_421
1	16517785	16519169	wt.q.01_peak_422
1	16519407	16519576	wt.q.01_peak_423
1	16519793	16520657	wt.q.01_peak_424
1	16520889	16521084	wt.q.01_peak_425
1	16547015	16547323	wt.q.01_peak_426
1	16559557	16559750	wt.q.01_peak_427
1	16565122	16565341	wt.q.01_peak_428
1	16568187	16568820	wt.q.01_peak_429
1	16586391	16587376	wt.q.01_peak_430
1	16614697	16620412	wt.q.01_peak_431
1	16636164	16637367	wt.q.01_peak_432
1	16655946	16657757	wt.q.01_peak_433
1	16664887	16666058	wt.q.01_peak_434
1	16687960	16689453	wt.q.01_peak_435
1	16700377	16700833	wt.q.01_peak_436
1	16703126	16704201	wt.q.01_peak_437
1	16735266	16735440	wt.q.01_peak_438
1	16758744	16759675	wt.q.01_peak_439
1	16809128	16811756	wt.q.01_peak_440
1	16816454	16816632	wt.q.01_peak_441
1	16916455	16917533	wt.q.01_peak_442
1	16929397	16929659	wt.q.01_peak_443
1	16934393	16935080	wt.q.01_peak_444
1	16987078	16989268	wt.q.01_peak_445
1	16997038	16997322	wt.q.01_peak_446
1	17007765	17009066	wt.q.01_peak_447
1	17041080	17041302	wt.q.01_peak_448
1	17041801	17042052	wt.q.01_peak_449
1	17042527	17043902	wt.q.01_peak_450
1	17053965	17054518	wt.q.01_peak_451
1	17084432	17085902	wt.q.01_peak_452
1	17088535	17088859	wt.q.01_peak_453
1	17094285	17099030	wt.q.01_peak_454
1	17116763	17117224	wt.q.01_peak_455
1	17120036	17121595	wt.q.01_peak_456
1	17122294	17123598	wt.q.01_peak_457
1	17145026	17146230	wt.q.01_peak_458
1	17148326	17148538	wt.q.01_peak_459
1	17163499	17163922	wt.q.01_peak_460
1	17172424	17173307	wt.q.01_peak_461
1	17309607	17309961	wt.q.01_peak_462
1	17310160	17311961	wt.q.01_peak_463
1	17537620	17537840	wt.q.01_peak_464
1	17716270	17716868	wt.q.01_peak_465
1	17718196	17718520	wt.q.01_peak_466
1	17726995	17728128	wt.q.01_peak_467
1	17735412	17736375	wt.q.01_peak_468
1	17741073	17741304	wt.q.01_peak_469
1	17805313	17805492	wt.q.01_peak_470
1	17838476	17838780	wt.q.01_peak_471
1	18030557	18030715	wt.q.01_peak_472
1	18057405	18058160	wt.q.01_peak_473
1	18058385	18058990	wt.q.01_peak_474
1	18106383	18107153	wt.q.01_peak_475
1	18129637	18130224	wt.q.01_peak_476
1	18147371	18149159	wt.q.01_peak_477
1	18167896	18169187	wt.q.01_peak_478
1	18180553	18181973	wt.q.01_peak_479
1	18293311	18293680	wt.q.01_peak_480
1	18300422	18300750	wt.q.01_peak_481
1	18307528	18308701	wt.q.01_peak_482
1	18359920	18360077	wt.q.01_peak_483
1	18458407	18458994	wt.q.01_peak_484
1	18536023	18536871	wt.q.01_peak_485
1	18551529	18551830	wt.q.01_peak_486
1	18578097	18579255	wt.q.01_peak_487
1	18594337	18594893	wt.q.01_peak_488
1	18666778	18668972	wt.q.01_peak_489
1	18698673	18698899	wt.q.01_peak_490
1	18852778	18853565	wt.q.01_peak_491
1	18857708	18858200	wt.q.01_peak_492
1	18936155	18936373	wt.q.01_peak_493
1	18976465	18977226	wt.q.01_peak_494
1	18977721	18977986	wt.q.01_peak_495
1	19032170	19032343	wt.q.01_peak_496
1	19102807	19103078	wt.q.01_peak_497
1	19103563	19104466	wt.q.01_peak_498
1	19105630	19106091	wt.q.01_peak_499
1	19106426	19106619	wt.q.01_peak_500
1	19107001	19107353	wt.q.01_peak_501
1	19109610	19110139	wt.q.01_peak_502
1	19205793	19206271	wt.q.01_peak_503
1	19460124	19460284	wt.q.01_peak_504
1	20049949	20050118	wt.q.01_peak_505
1	20135647	20136847	wt.q.01_peak_506
1	20139610	20140207	wt.q.01_peak_507
1	20148707	20149435	wt.q.01_peak_508
1	20311454	20311614	wt.q.01_peak_509
1	20311784	20311959	wt.q.01_peak_510
1	20352521	20352779	wt.q.01_peak_511
1	20354042	20354282	wt.q.01_peak_512
1	20368708	20369478	wt.q.01_peak_513
1	20376203	20377492	wt.q.01_peak_514
1	20449453	20450244	wt.q.01_peak_515
1	20499257	20499426	wt.q.01_peak_516
1	20620295	20620898	wt.q.01_peak_517
1	20633647	20634581	wt.q.01_peak_518
1	20759570	20760225	wt.q.01_peak_519
1	20786210	20786449	wt.q.01_peak_520
1	20819593	20820963	wt.q.01_peak_521
1	20848703	20848890	wt.q.01_peak_522
1	20873975	20874214	wt.q.01_peak_523
1	20883005	20883184	wt.q.01_peak_524
1	20883504	20883693	wt.q.01_peak_525
1	20890292	20891517	wt.q.01_peak_526
1	20905358	20906813	wt.q.01_peak_527
1	20923133	20923597	wt.q.01_peak_528
1	20933689	20933940	wt.q.01_peak_529
1	20939050	20939528	wt.q.01_peak_530
1	20950840	20952248	wt.q.01_peak_531
1	20981357	20981913	wt.q.01_peak_532
1	21008674	21009431	wt.q.01_peak_533
1	21010267	21010545	wt.q.01_peak_534
1	21079411	21079961	wt.q.01_peak_535
1	21166404	21167121	wt.q.01_peak_536
1	21189409	21189841	wt.q.01_peak_537
1	21213742	21214627	wt.q.01_peak_538
1	21218209	21219618	wt.q.01_peak_539
1	21231477	21232895	wt.q.01_peak_540
1	21271403	21271615	wt.q.01_peak_541
1	21271941	21272640	wt.q.01_peak_542
1	21275570	21275746	wt.q.01_peak_543
1	21305466	21305705	wt.q.01_peak_544
1	21305909	21306068	wt.q.01_peak_545
1	21371797	21371973	wt.q.01_peak_546
1	21410962	21412557	wt.q.01_peak_547
1	21419241	21420137	wt.q.01_peak_548
1	21423547	21423789	wt.q.01_peak_549
1	21434665	21435176	wt.q.01_peak_550
1	21445490	21446632	wt.q.01_peak_551
1	21459013	21459237	wt.q.01_peak_552
1	21460350	21460722	wt.q.01_peak_553
1	21466256	21466510	wt.q.01_peak_554
1	21466688	21466899	wt.q.01_peak_555
1	21468402	21468584	wt.q.01_peak_556
1	21470712	21471281	wt.q.01_peak_557
1	21485715	21485938	wt.q.01_peak_558
1	21489992	21490176	wt.q.01_peak_559
1	21496216	21496910	wt.q.01_peak_560
1	21499331	21501339	wt.q.01_peak_561
1	21506416	21508585	wt.q.01_peak_562
1	21535269	21536118	wt.q.01_peak_563
1	21539027	21540337	wt.q.01_peak_564
1	21552326	21555005	wt.q.01_peak_565
1	21598179	21598342	wt.q.01_peak_566
1	21600247	21601533	wt.q.01_peak_567
1	21602526	21602718	wt.q.01_peak_568
1	21608075	21608991	wt.q.01_peak_569
1	21615883	21616937	wt.q.01_peak_570
1	21621012	21621386	wt.q.01_peak_571
1	21635207	21636094	wt.q.01_peak_572
1	21650777	21650966	wt.q.01_peak_573
1	21675006	21675308	wt.q.01_peak_574
1	21676285	21678101	wt.q.01_peak_575
1	21678849	21680940	wt.q.01_peak_576
1	21681419	21681805	wt.q.01_peak_577
1	21683612	21685345	wt.q.01_peak_578
1	21688886	21689088	wt.q.01_peak_579
1	21690393	21691055	wt.q.01_peak_580
1	21694478	21694735	wt.q.01_peak_581
1	21720717	21721402	wt.q.01_peak_582
1	21729017	21730024	wt.q.01_peak_583
1	21733622	21733776	wt.q.01_peak_584
1	21734021	21734810	wt.q.01_peak_585
1	21748942	21749312	wt.q.01_peak_586
1	21749499	21749731	wt.q.01_peak_587
1	21750899	21752349	wt.q.01_peak_588
1	21756747	21757832	wt.q.01_peak_589
1	21760542	21762229	wt.q.01_peak_590
1	21771825	21772039	wt.q.01_peak_591
1	21803651	21805826	wt.q.01_peak_592
1	21829044	21829340	wt.q.01_peak_593
1	21830219	21830389	wt.q.01_peak_594
1	21851166	21851345	wt.q.01_peak_595
1	21922407	21923935	wt.q.01_peak_596
1	21937080	21937252	wt.q.01_peak_597
1	21938374	21939776	wt.q.01_peak_598
1	21940851	21942631	wt.q.01_peak_599
1	21947862	21949027	wt.q.01_peak_600
1	21957897	21964134	wt.q.01_peak_601
1	21966904	21967280	wt.q.01_peak_602
1	22032996	22033192	wt.q.01_peak_603
1	22109800	22110139	wt.q.01_peak_604
1	22110302	22110462	wt.q.01_peak_605
1	22136616	22137357	wt.q.01_peak_606
1	22167665	22168350	wt.q.01_peak_607
1	22182844	22183867	wt.q.01_peak_608
1	22210224	22212341	wt.q.01_peak_609
1	22222752	22223421	wt.q.01_peak_610
1	22245226	22246623	wt.q.01_peak_611
1	22255865	22256151	wt.q.01_peak_612
1	22260047	22260773	wt.q.01_peak_613
1	22262154	22263247	wt.q.01_peak_614
1	22265561	22267099	wt.q.01_peak_615
1	22268844	22269379	wt.q.01_peak_616
1	22274395	22275647	wt.q.01_peak_617
1	22299604	22299848	wt.q.01_peak_618
1	22301713	22302523	wt.q.01_peak_619
1	22365939	22366323	wt.q.01_peak_620
1	22367667	22367914	wt.q.01_peak_621
1	22376619	22376775	wt.q.01_peak_622
1	22377325	22377775	wt.q.01_peak_623
1	22378104	22378356	wt.q.01_peak_624
1	22379627	22379971	wt.q.01_peak_625
1	22386375	22386539	wt.q.01_peak_626
1	22403492	22403796	wt.q.01_peak_627
1	22419381	22419907	wt.q.01_peak_628
1	22487619	22487823	wt.q.01_peak_629
1	22503594	22503796	wt.q.01_peak_630
1	22507362	22507848	wt.q.01_peak_631
1	22513627	22514227	wt.q.01_peak_632
1	22514446	22514648	wt.q.01_peak_633
1	22514989	22515345	wt.q.01_peak_634
1	22526600	22526850	wt.q.01_peak_635
1	22527249	22527488	wt.q.01_peak_636
1	22531872	22533205	wt.q.01_peak_637
1	22534333	22534948	wt.q.01_peak_638
1	22538794	22540186	wt.q.01_peak_639
1	22574203	22574474	wt.q.01_peak_640
1	22576504	22576705	wt.q.01_peak_641
1	22585416	22585982	wt.q.01_peak_642
1	22595817	22597017	wt.q.01_peak_643
1	22604541	22605388	wt.q.01_peak_644
1	22608118	22608324	wt.q.01_peak_645
1	22615225	22615963	wt.q.01_peak_646
1	22619947	22620130	wt.q.01_peak_647
1	22626061	22627745	wt.q.01_peak_648
1	22642925	22643088	wt.q.01_peak_649
1	22643755	22643932	wt.q.01_peak_650
1	22645695	22645864	wt.q.01_peak_651
1	22654289	22656843	wt.q.01_peak_652
1	22657718	22658889	wt.q.01_peak_653
1	22661134	22663043	wt.q.01_peak_654
1	22663983	22665078	wt.q.01_peak_655
1	22670506	22670751	wt.q.01_peak_656
1	22684084	22684325	wt.q.01_peak_657
1	22688086	22688406	wt.q.01_peak_658
1	22690349	22691217	wt.q.01_peak_659
1	22693467	22694568	wt.q.01_peak_660
1	22696749	22698692	wt.q.01_peak_661
1	22709627	22710112	wt.q.01_peak_662
1	22710283	22710513	wt.q.01_peak_663
1	22713329	22713812	wt.q.01_peak_664
1	22717437	22718536	wt.q.01_peak_665
1	22719400	22721659	wt.q.01_peak_666
1	22725487	22726744	wt.q.01_peak_667
1	22727443	22729049	wt.q.01_peak_668
1	22733169	22733392	wt.q.01_peak_669
1	22734409	22734589	wt.q.01_peak_670
1	22740243	22740570	wt.q.01_peak_671
1	22743018	22744082	wt.q.01_peak_672
1	22748380	22749410	wt.q.01_peak_673
1	22763146	22764167	wt.q.01_peak_674
1	22764391	22764709	wt.q.01_peak_675
1	22765317	22765492	wt.q.01_peak_676
1	22775038	22775321	wt.q.01_peak_677
1	22782522	22782700	wt.q.01_peak_678
1	22783906	22784093	wt.q.01_peak_679
1	22789149	22790033	wt.q.01_peak_680
1	22794710	22795615	wt.q.01_peak_681
1	22798101	22798588	wt.q.01_peak_682
1	22799693	22801054	wt.q.01_peak_683
1	22801942	22805618	wt.q.01_peak_684
1	22805942	22807446	wt.q.01_peak_685
1	22883748	22884461	wt.q.01_peak_686
1	22889956	22890732	wt.q.01_peak_687
1	22928386	22928570	wt.q.01_peak_688
1	22937431	22938062	wt.q.01_peak_689
1	22939473	22940487	wt.q.01_peak_690
1	22943007	22944779	wt.q.01_peak_691
1	22978202	22978362	wt.q.01_peak_692
1	23004934	23005137	wt.q.01_peak_693
1	23061620	23062633	wt.q.01_peak_694
1	23063970	23064669	wt.q.01_peak_695
1	23067605	23067802	wt.q.01_peak_696
1	23097792	23099119	wt.q.01_peak_697
1	23102664	23103651	wt.q.01_peak_698
1	23117370	23118340	wt.q.01_peak_699
1	23119242	23119891	wt.q.01_peak_700
1	23138737	23138904	wt.q.01_peak_701
1	23140413	23140648	wt.q.01_peak_702
1	23151996	23152843	wt.q.01_peak_703
1	23153032	23153209	wt.q.01_peak_704
1	23173129	23173308	wt.q.01_peak_705
1	23202537	23203065	wt.q.01_peak_706
1	23224210	23224470	wt.q.01_peak_707
1	23230896	23232100	wt.q.01_peak_708
1	23255513	23258897	wt.q.01_peak_709
1	23261788	23262856	wt.q.01_peak_710
1	23263027	23265532	wt.q.01_peak_711
1	23266009	23266477	wt.q.01_peak_712
1	23286597	23286828	wt.q.01_peak_713
1	23286989	23287239	wt.q.01_peak_714
1	23324170	23324362	wt.q.01_peak_715
1	23365832	23366297	wt.q.01_peak_716
1	23374870	23375078	wt.q.01_peak_717
1	23378499	23382609	wt.q.01_peak_718
1	23383167	23383863	wt.q.01_peak_719
1	23409378	23410599	wt.q.01_peak_720
1	23411116	23411419	wt.q.01_peak_721
1	23462766	23462925	wt.q.01_peak_722
1	23463752	23464125	wt.q.01_peak_723
1	23464378	23464640	wt.q.01_peak_724
1	23650237	23650530	wt.q.01_peak_725
1	23762701	23762881	wt.q.01_peak_726
1	23792725	23792903	wt.q.01_peak_727
1	23827304	23827491	wt.q.01_peak_728
1	23834689	23834894	wt.q.01_peak_729
1	23843848	23844489	wt.q.01_peak_730
1	23849445	23850100	wt.q.01_peak_731
1	23851007	23851627	wt.q.01_peak_732
1	23864945	23865681	wt.q.01_peak_733
1	23866001	23868770	wt.q.01_peak_734
1	23892722	23893076	wt.q.01_peak_735
1	23897192	23897916	wt.q.01_peak_736
1	23899708	23900055	wt.q.01_peak_737
1	23902315	23902769	wt.q.01_peak_738
1	23903119	23903563	wt.q.01_peak_739
1	23905590	23907455	wt.q.01_peak_740
1	23908796	23909770	wt.q.01_peak_741
1	23910588	23910784	wt.q.01_peak_742
1	23911253	23911599	wt.q.01_peak_743
1	23912373	23912675	wt.q.01_peak_744
1	23914090	23914730	wt.q.01_peak_745
1	23915327	23915501	wt.q.01_peak_746
1	23916466	23918189	wt.q.01_peak_747
1	23918936	23922237	wt.q.01_peak_748
1	23922452	23922948	wt.q.01_peak_749
1	23928055	23929081	wt.q.01_peak_750
1	23934441	23935591	wt.q.01_peak_751
1	23941947	23942105	wt.q.01_peak_752
1	23942854	23944354	wt.q.01_peak_753
1	23950939	23951176	wt.q.01_peak_754
1	23953324	23954521	wt.q.01_peak_755
1	23976926	23979092	wt.q.01_peak_756
1	23985050	23986026	wt.q.01_peak_757
1	23989400	23989576	wt.q.01_peak_758
1	24004221	24006176	wt.q.01_peak_759
1	24012232	24012442	wt.q.01_peak_760
1	24021036	24021626	wt.q.01_peak_761
1	24033590	24034663	wt.q.01_peak_762
1	24074024	24075066	wt.q.01_peak_763
1	24089809	24090413	wt.q.01_peak_764
1	24094043	24095185	wt.q.01_peak_765
1	24097015	24101024	wt.q.01_peak_766
1	24106996	24108682	wt.q.01_peak_767
1	24115988	24116160	wt.q.01_peak_768
1	24120147	24120879	wt.q.01_peak_769
1	24122031	24123262	wt.q.01_peak_770
1	24128158	24128593	wt.q.01_peak_771
1	24134660	24135025	wt.q.01_peak_772
1	24136922	24137566	wt.q.01_peak_773
1	24143785	24144143	wt.q.01_peak_774
1	24158041	24158217	wt.q.01_peak_775
1	24171382	24171537	wt.q.01_peak_776
1	24171696	24171946	wt.q.01_peak_777
1	24172953	24173365	wt.q.01_peak_778
1	24219014	24219500	wt.q.01_peak_779
1	24222611	24224269	wt.q.01_peak_780
1	24225203	24225579	wt.q.01_peak_781
1	24225896	24228489	wt.q.01_peak_782
1	24228972	24230690	wt.q.01_peak_783
1	24237798	24238962	wt.q.01_peak_784
1	24248930	24249576	wt.q.01_peak_785
1	24264085	24264928	wt.q.01_peak_786
1	24302505	24302765	wt.q.01_peak_787
1	24349440	24350170	wt.q.01_peak_788
1	24367507	24368806	wt.q.01_peak_789
1	24451905	24452878	wt.q.01_peak_790
1	24457776	24458652	wt.q.01_peak_791
1	24459154	24459375	wt.q.01_peak_792
1	24462437	24463232	wt.q.01_peak_793
1	24509858	24510056	wt.q.01_peak_794
1	24526633	24527901	wt.q.01_peak_795
1	24528482	24529912	wt.q.01_peak_796
1	24551630	24551870	wt.q.01_peak_797
1	24552260	24552659	wt.q.01_peak_798
1	24553634	24553843	wt.q.01_peak_799
1	24578194	24579054	wt.q.01_peak_800
1	24585844	24588370	wt.q.01_peak_801
1	24588660	24589816	wt.q.01_peak_802
1	24598611	24598769	wt.q.01_peak_803
1	24617841	24618913	wt.q.01_peak_804
1	24621482	24622663	wt.q.01_peak_805
1	24625612	24625890	wt.q.01_peak_806
1	24634029	24634357	wt.q.01_peak_807
1	24661062	24662624	wt.q.01_peak_808
1	24663205	24663797	wt.q.01_peak_809
1	24663989	24665064	wt.q.01_peak_810
1	24666635	24666967	wt.q.01_peak_811
1	24672659	24674253	wt.q.01_peak_812
1	24674684	24675732	wt.q.01_peak_813
1	24675895	24676148	wt.q.01_peak_814
1	24677135	24680598	wt.q.01_peak_815
1	24703328	24704430	wt.q.01_peak_816
1	24710379	24710645	wt.q.01_peak_817
1	24714020	24714574	wt.q.01_peak_818
1	24715407	24715615	wt.q.01_peak_819
1	24718449	24718627	wt.q.01_peak_820
1	24719258	24720152	wt.q.01_peak_821
1	24730108	24730305	wt.q.01_peak_822
1	24739359	24739792	wt.q.01_peak_823
1	24741469	24741722	wt.q.01_peak_824
1	24773532	24773695	wt.q.01_peak_825
1	24781090	24781267	wt.q.01_peak_826
1	24786922	24787118	wt.q.01_peak_827
1	24866106	24866278	wt.q.01_peak_828
1	24866866	24867158	wt.q.01_peak_829
1	24869561	24870113	wt.q.01_peak_830
1	24870678	24871108	wt.q.01_peak_831
1	24901244	24902098	wt.q.01_peak_832
1	24904417	24905553	wt.q.01_peak_833
1	24999991	25000593	wt.q.01_peak_834
1	25008132	25009438	wt.q.01_peak_835
1	25033494	25034587	wt.q.01_peak_836
1	25042044	25043051	wt.q.01_peak_837
1	25043264	25043447	wt.q.01_peak_838
1	25043875	25044243	wt.q.01_peak_839
1	25053490	25053896	wt.q.01_peak_840
1	25059620	25061979	wt.q.01_peak_841
1	25064911	25065086	wt.q.01_peak_842
1	25069299	25069548	wt.q.01_peak_843
1	25075259	25076020	wt.q.01_peak_844
1	25078277	25078476	wt.q.01_peak_845
1	25078711	25080228	wt.q.01_peak_846
1	25081171	25084379	wt.q.01_peak_847
1	25085037	25086643	wt.q.01_peak_848
1	25089102	25089292	wt.q.01_peak_849
1	25090803	25091839	wt.q.01_peak_850
1	25092075	25092338	wt.q.01_peak_851
1	25092872	25093058	wt.q.01_peak_852
1	25095494	25095918	wt.q.01_peak_853
1	25096190	25097276	wt.q.01_peak_854
1	25098477	25098705	wt.q.01_peak_855
1	25099034	25099820	wt.q.01_peak_856
1	25101791	25102108	wt.q.01_peak_857
1	25104050	25104280	wt.q.01_peak_858
1	25104507	25109194	wt.q.01_peak_859
1	25109765	25110329	wt.q.01_peak_860
1	25110655	25110986	wt.q.01_peak_861
1	25112280	25112708	wt.q.01_peak_862
1	25114489	25115215	wt.q.01_peak_863
1	25118805	25119116	wt.q.01_peak_864
1	25127318	25127509	wt.q.01_peak_865
1	25132494	25133101	wt.q.01_peak_866
1	25145830	25146914	wt.q.01_peak_867
1	25152077	25152434	wt.q.01_peak_868
1	25154703	25154865	wt.q.01_peak_869
1	25156006	25156246	wt.q.01_peak_870
1	25158070	25158303	wt.q.01_peak_871
1	25159788	25161517	wt.q.01_peak_872
1	25162226	25162510	wt.q.01_peak_873
1	25162975	25167683	wt.q.01_peak_874
1	25173750	25174293	wt.q.01_peak_875
1	25174668	25175424	wt.q.01_peak_876
1	25176659	25177171	wt.q.01_peak_877
1	25179218	25181530	wt.q.01_peak_878
1	25199762	25201459	wt.q.01_peak_879
1	25204826	25205177	wt.q.01_peak_880
1	25206853	25207029	wt.q.01_peak_881
1	25211503	25211721	wt.q.01_peak_882
1	25212524	25212871	wt.q.01_peak_883
1	25214771	25215044	wt.q.01_peak_884
1	25217395	25218089	wt.q.01_peak_885
1	25225165	25225456	wt.q.01_peak_886
1	25225684	25230788	wt.q.01_peak_887
1	25231395	25231584	wt.q.01_peak_888
1	25267418	25268583	wt.q.01_peak_889
1	25268949	25270181	wt.q.01_peak_890
1	25281315	25281554	wt.q.01_peak_891
1	25317122	25317574	wt.q.01_peak_892
1	25319053	25319891	wt.q.01_peak_893
1	25325307	25325571	wt.q.01_peak_894
1	25327079	25327739	wt.q.01_peak_895
1	25358269	25359259	wt.q.01_peak_896
1	25376700	25377042	wt.q.01_peak_897
1	25383271	25383448	wt.q.01_peak_898
1	25427565	25427953	wt.q.01_peak_899
1	25430515	25431197	wt.q.01_peak_900
1	25435425	25435965	wt.q.01_peak_901
1	25441959	25444036	wt.q.01_peak_902
1	25448867	25449319	wt.q.01_peak_903
1	25449501	25449833	wt.q.01_peak_904
1	25451354	25451650	wt.q.01_peak_905
1	25475162	25476483	wt.q.01_peak_906
1	25490113	25490943	wt.q.01_peak_907
1	25491831	25492077	wt.q.01_peak_908
1	25503868	25505119	wt.q.01_peak_909
1	25509761	25510810	wt.q.01_peak_910
1	25526905	25527407	wt.q.01_peak_911
1	25536851	25537021	wt.q.01_peak_912
1	25538581	25539015	wt.q.01_peak_913
1	25542141	25543625	wt.q.01_peak_914
1	25544136	25544746	wt.q.01_peak_915
1	25568355	25568664	wt.q.01_peak_916
1	25573047	25573201	wt.q.01_peak_917
1	25575951	25577406	wt.q.01_peak_918
1	25583976	25584504	wt.q.01_peak_919
1	25588769	25589563	wt.q.01_peak_920
1	25598909	25600184	wt.q.01_peak_921
1	25617198	25617552	wt.q.01_peak_922
1	25619768	25620439	wt.q.01_peak_923
1	25621808	25623849	wt.q.01_peak_924
1	25637579	25637792	wt.q.01_peak_925
1	25642573	25642778	wt.q.01_peak_926
1	25643750	25645149	wt.q.01_peak_927
1	25645387	25645719	wt.q.01_peak_928
1	25646989	25647145	wt.q.01_peak_929
1	25657241	25658571	wt.q.01_peak_930
1	25671055	25673348	wt.q.01_peak_931
1	25679165	25679459	wt.q.01_peak_932
1	25679650	25679805	wt.q.01_peak_933
1	25681603	25683015	wt.q.01_peak_934
1	25684714	25684998	wt.q.01_peak_935
1	25686175	25686359	wt.q.01_peak_936
1	25691780	25691964	wt.q.01_peak_937
1	25694335	25694693	wt.q.01_peak_938
1	25696524	25699697	wt.q.01_peak_939
1	25704002	25704163	wt.q.01_peak_940
1	25708472	25708720	wt.q.01_peak_941
1	25711366	25711932	wt.q.01_peak_942
1	25712917	25713091	wt.q.01_peak_943
1	25715488	25715872	wt.q.01_peak_944
1	25718765	25719372	wt.q.01_peak_945
1	25722360	25722718	wt.q.01_peak_946
1	25732465	25732638	wt.q.01_peak_947
1	25734097	25734440	wt.q.01_peak_948
1	25759783	25760182	wt.q.01_peak_949
1	25767177	25767338	wt.q.01_peak_950
1	25769079	25769319	wt.q.01_peak_951
1	25775293	25775768	wt.q.01_peak_952
1	25776046	25776721	wt.q.01_peak_953
1	25776993	25777250	wt.q.01_peak_954
1	25781972	25782142	wt.q.01_peak_955
1	25783243	25784116	wt.q.01_peak_956
1	25784504	25785029	wt.q.01_peak_957
1	25785202	25785370	wt.q.01_peak_958
1	25789612	25789869	wt.q.01_peak_959
1	25794595	25794755	wt.q.01_peak_960
1	25812580	25812757	wt.q.01_peak_961
1	25815176	25815407	wt.q.01_peak_962
1	25818411	25818703	wt.q.01_peak_963
1	25822161	25822724	wt.q.01_peak_964
1	25823003	25833020	wt.q.01_peak_965
1	25857214	25857909	wt.q.01_peak_966
1	25877173	25877983	wt.q.01_peak_967
1	25891698	25892843	wt.q.01_peak_968
1	25921173	25921858	wt.q.01_peak_969
1	26062818	26063189	wt.q.01_peak_970
1	26097810	26098000	wt.q.01_peak_971
1	26204025	26205142	wt.q.01_peak_972
1	26256423	26256684	wt.q.01_peak_973
1	26276190	26277273	wt.q.01_peak_974
1	26282174	26283948	wt.q.01_peak_975
1	26289383	26290794	wt.q.01_peak_976
1	26290952	26291207	wt.q.01_peak_977
1	26318138	26319215	wt.q.01_peak_978
1	26321163	26321790	wt.q.01_peak_979
1	26329098	26329676	wt.q.01_peak_980
1	26402464	26403233	wt.q.01_peak_981
1	26404176	26405454	wt.q.01_peak_982
1	26426315	26427115	wt.q.01_peak_983
1	26559170	26560078	wt.q.01_peak_984
1	26646872	26647050	wt.q.01_peak_985
1	26780871	26781264	wt.q.01_peak_986
1	26853436	26854485	wt.q.01_peak_987
1	26857359	26858237	wt.q.01_peak_988
1	26909540	26911160	wt.q.01_peak_989
1	26914031	26914240	wt.q.01_peak_990
1	26987643	26987873	wt.q.01_peak_991
1	27025458	27026238	wt.q.01_peak_992
1	27047919	27049133	wt.q.01_peak_993
1	27062007	27063020	wt.q.01_peak_994
1	27110383	27111498	wt.q.01_peak_995
1	27248042	27248234	wt.q.01_peak_996
1	27250214	27251376	wt.q.01_peak_997
1	27264163	27266036	wt.q.01_peak_998
1	27298129	27299444	wt.q.01_peak_999
1	27300757	27300956	wt.q.01_peak_1000
1	27303333	27304285	wt.q.01_peak_1001
1	27306662	27307481	wt.q.01_peak_1002
1	27458967	27459892	wt.q.01_peak_1003
1	27477825	27479811	wt.q.01_peak_1004
1	27480112	27480367	wt.q.01_peak_1005
1	27503583	27504391	wt.q.01_peak_1006
1	27559619	27560001	wt.q.01_peak_1007
1	27608148	27609583	wt.q.01_peak_1008
1	27620602	27620787	wt.q.01_peak_1009
1	27621021	27621366	wt.q.01_peak_1010
1	27621580	27621843	wt.q.01_peak_1011
1	27625416	27625607	wt.q.01_peak_1012
1	27626707	27626960	wt.q.01_peak_1013
1	27627211	27627684	wt.q.01_peak_1014
1	27628812	27629738	wt.q.01_peak_1015
1	27630216	27630372	wt.q.01_peak_1016
1	27638036	27638218	wt.q.01_peak_1017
1	27638399	27638789	wt.q.01_peak_1018
1	27641870	27642291	wt.q.01_peak_1019
1	27657726	27658870	wt.q.01_peak_1020
1	27693801	27694042	wt.q.01_peak_1021
1	27695871	27696115	wt.q.01_peak_1022
1	27697324	27698199	wt.q.01_peak_1023
1	27721827	27723081	wt.q.01_peak_1024
1	27829080	27829251	wt.q.01_peak_1025
1	27835034	27835719	wt.q.01_peak_1026
1	27883993	27884340	wt.q.01_peak_1027
1	27886812	27887956	wt.q.01_peak_1028
1	27925505	27925927	wt.q.01_peak_1029
1	27958494	27958656	wt.q.01_peak_1030
1	27965773	27966201	wt.q.01_peak_1031
1	27999232	27999505	wt.q.01_peak_1032
1	28003486	28004523	wt.q.01_peak_1033
1	28045948	28046336	wt.q.01_peak_1034
1	28047230	28048197	wt.q.01_peak_1035
1	28053791	28054752	wt.q.01_peak_1036
1	28083589	28084065	wt.q.01_peak_1037
1	28100707	28100877	wt.q.01_peak_1038
1	28101842	28102633	wt.q.01_peak_1039
1	28214154	28215061	wt.q.01_peak_1040
1	28218237	28218678	wt.q.01_peak_1041
1	28340173	28340344	wt.q.01_peak_1042
1	28348202	28350290	wt.q.01_peak_1043
1	28370851	28372362	wt.q.01_peak_1044
1	28372828	28374599	wt.q.01_peak_1045
1	28435699	28435873	wt.q.01_peak_1046
1	28453369	28453659	wt.q.01_peak_1047
1	28602220	28602404	wt.q.01_peak_1048
1	28602633	28603189	wt.q.01_peak_1049
1	28795753	28796517	wt.q.01_peak_1050
1	28806265	28807382	wt.q.01_peak_1051
1	28807712	28809515	wt.q.01_peak_1052
1	28870113	28870951	wt.q.01_peak_1053
1	28969576	28969761	wt.q.01_peak_1054
1	28970123	28971803	wt.q.01_peak_1055
1	28981795	28982002	wt.q.01_peak_1056
1	28986595	28986859	wt.q.01_peak_1057
1	28987040	28987256	wt.q.01_peak_1058
1	28994952	28996313	wt.q.01_peak_1059
1	28996898	28997347	wt.q.01_peak_1060
1	28997845	28998069	wt.q.01_peak_1061
1	28998261	28998835	wt.q.01_peak_1062
1	29001647	29002137	wt.q.01_peak_1063
1	29018974	29019937	wt.q.01_peak_1064
1	29057197	29057938	wt.q.01_peak_1065
1	29182236	29183911	wt.q.01_peak_1066
1	29342501	29342676	wt.q.01_peak_1067
1	29342852	29343173	wt.q.01_peak_1068
1	29346750	29347538	wt.q.01_peak_1069
1	29363862	29364253	wt.q.01_peak_1070
1	29824372	29824688	wt.q.01_peak_1071
1	29855200	29855378	wt.q.01_peak_1072
1	29964120	29964503	wt.q.01_peak_1073
1	30017204	30018849	wt.q.01_peak_1074
1	30061374	30061542	wt.q.01_peak_1075
1	30136505	30137439	wt.q.01_peak_1076
1	30137934	30138202	wt.q.01_peak_1077
1	30138802	30139230	wt.q.01_peak_1078
1	30143745	30144187	wt.q.01_peak_1079
1	30144377	30145658	wt.q.01_peak_1080
1	30181370	30181666	wt.q.01_peak_1081
1	30184087	30185123	wt.q.01_peak_1082
1	30204491	30205294	wt.q.01_peak_1083
1	30219387	30219866	wt.q.01_peak_1084
1	30233940	30234289	wt.q.01_peak_1085
1	30415403	30417740	wt.q.01_peak_1086
1	30437696	30439512	wt.q.01_peak_1087
1	30501895	30502441	wt.q.01_peak_1088
1	30502668	30503688	wt.q.01_peak_1089
1	30554461	30555559	wt.q.01_peak_1090
1	30584618	30585480	wt.q.01_peak_1091
1	30588569	30589070	wt.q.01_peak_1092
1	30589683	30589888	wt.q.01_peak_1093
1	30590140	30591356	wt.q.01_peak_1094
1	30593542	30595837	wt.q.01_peak_1095
1	30632400	30633643	wt.q.01_peak_1096
1	30636045	30636918	wt.q.01_peak_1097
1	30646921	30647187	wt.q.01_peak_1098
1	30685016	30685177	wt.q.01_peak_1099
1	30685622	30685994	wt.q.01_peak_1100
1	30700132	30701997	wt.q.01_peak_1101
1	30715957	30716791	wt.q.01_peak_1102
1	30718772	30719406	wt.q.01_peak_1103
1	30721057	30721276	wt.q.01_peak_1104
1	30721622	30721797	wt.q.01_peak_1105
1	30751097	30751284	wt.q.01_peak_1106
1	30754913	30757354	wt.q.01_peak_1107
1	30773919	30774238	wt.q.01_peak_1108
1	30778641	30779381	wt.q.01_peak_1109
1	30789819	30790265	wt.q.01_peak_1110
1	30792838	30793886	wt.q.01_peak_1111
1	30818844	30819954	wt.q.01_peak_1112
1	30831937	30833332	wt.q.01_peak_1113
1	30846068	30846222	wt.q.01_peak_1114
1	30860073	30860831	wt.q.01_peak_1115
1	30869747	30870679	wt.q.01_peak_1116
1	30871122	30873042	wt.q.01_peak_1117
1	30873456	30874671	wt.q.01_peak_1118
1	30935765	30936198	wt.q.01_peak_1119
1	30946557	30951014	wt.q.01_peak_1120
1	31044560	31045168	wt.q.01_peak_1121
1	31059066	31059347	wt.q.01_peak_1122
1	31059572	31059798	wt.q.01_peak_1123
1	31064680	31065834	wt.q.01_peak_1124
1	31095535	31096633	wt.q.01_peak_1125
1	31100760	31102347	wt.q.01_peak_1126
1	31153849	31154561	wt.q.01_peak_1127
1	31157120	31157380	wt.q.01_peak_1128
1	31177767	31178293	wt.q.01_peak_1129
1	31209993	31210575	wt.q.01_peak_1130
1	31220772	31221368	wt.q.01_peak_1131
1	31259736	31261192	wt.q.01_peak_1132
1	31449256	31449548	wt.q.01_peak_1133
1	31729985	31730381	wt.q.01_peak_1134
1	32171917	32177269	wt.q.01_peak_1135
1	32178706	32179214	wt.q.01_peak_1136
1	32196920	32197694	wt.q.01_peak_1137
1	32222926	32223089	wt.q.01_peak_1138
1	32223310	32225148	wt.q.01_peak_1139
1	32230371	32230969	wt.q.01_peak_1140
1	32241566	32241806	wt.q.01_peak_1141
1	32242304	32244116	wt.q.01_peak_1142
1	32270757	32271019	wt.q.01_peak_1143
1	32286339	32286850	wt.q.01_peak_1144
1	32294222	32295806	wt.q.01_peak_1145
1	32300547	32302466	wt.q.01_peak_1146
1	32303064	32304261	wt.q.01_peak_1147
1	32306058	32306215	wt.q.01_peak_1148
1	32309185	32309368	wt.q.01_peak_1149
1	32309785	32310036	wt.q.01_peak_1150
1	32338897	32339867	wt.q.01_peak_1151
1	32346511	32349849	wt.q.01_peak_1152
1	32350105	32351149	wt.q.01_peak_1153
1	32363834	32364097	wt.q.01_peak_1154
1	32410220	32410771	wt.q.01_peak_1155
1	32426586	32426757	wt.q.01_peak_1156
1	32428040	32429854	wt.q.01_peak_1157
1	32430269	32430645	wt.q.01_peak_1158
1	32432690	32433298	wt.q.01_peak_1159
1	32443667	32445856	wt.q.01_peak_1160
1	32460276	32461552	wt.q.01_peak_1161
1	32462336	32464132	wt.q.01_peak_1162
1	32470909	32471704	wt.q.01_peak_1163
1	32502225	32504146	wt.q.01_peak_1164
1	32504755	32504957	wt.q.01_peak_1165
1	32554230	32554433	wt.q.01_peak_1166
1	32611548	32612312	wt.q.01_peak_1167
1	32625546	32626679	wt.q.01_peak_1168
1	32632097	32634030	wt.q.01_peak_1169
1	32634877	32635859	wt.q.01_peak_1170
1	32638557	32639967	wt.q.01_peak_1171
1	32641388	32641588	wt.q.01_peak_1172
1	32689101	32689620	wt.q.01_peak_1173
1	32830283	32831497	wt.q.01_peak_1174
1	32885645	32885943	wt.q.01_peak_1175
1	33124834	33125275	wt.q.01_peak_1176
1	33125430	33125778	wt.q.01_peak_1177
1	33126664	33126941	wt.q.01_peak_1178
1	33174642	33176274	wt.q.01_peak_1179
1	33195119	33195490	wt.q.01_peak_1180
1	33201845	33202175	wt.q.01_peak_1181
1	33271262	33272185	wt.q.01_peak_1182
1	33499677	33500156	wt.q.01_peak_1183
1	33523372	33523566	wt.q.01_peak_1184
1	33530164	33530390	wt.q.01_peak_1185
1	33531744	33531906	wt.q.01_peak_1186
1	33584046	33584211	wt.q.01_peak_1187
1	33584984	33585178	wt.q.01_peak_1188
1	33585355	33585545	wt.q.01_peak_1189
1	33641139	33641743	wt.q.01_peak_1190
1	33647104	33647949	wt.q.01_peak_1191
1	33663069	33663985	wt.q.01_peak_1192
1	33669239	33670897	wt.q.01_peak_1193
1	33671508	33671826	wt.q.01_peak_1194
1	33693705	33694023	wt.q.01_peak_1195
1	33700961	33701658	wt.q.01_peak_1196
1	33719466	33720967	wt.q.01_peak_1197
1	33739307	33739488	wt.q.01_peak_1198
1	33742804	33743440	wt.q.01_peak_1199
1	33744090	33744538	wt.q.01_peak_1200
1	33751614	33751906	wt.q.01_peak_1201
1	33755146	33755321	wt.q.01_peak_1202
1	33756246	33757656	wt.q.01_peak_1203
1	33758498	33759045	wt.q.01_peak_1204
1	33771851	33772524	wt.q.01_peak_1205
1	33775138	33775653	wt.q.01_peak_1206
1	33775848	33777168	wt.q.01_peak_1207
1	33781306	33781537	wt.q.01_peak_1208
1	33793173	33793357	wt.q.01_peak_1209
1	33803275	33803786	wt.q.01_peak_1210
1	33809242	33810470	wt.q.01_peak_1211
1	33811985	33815101	wt.q.01_peak_1212
1	33817836	33818575	wt.q.01_peak_1213
1	33869422	33870133	wt.q.01_peak_1214
1	33874861	33875488	wt.q.01_peak_1215
1	33883148	33883778	wt.q.01_peak_1216
1	33893056	33893382	wt.q.01_peak_1217
1	33899409	33901055	wt.q.01_peak_1218
1	33906535	33909871	wt.q.01_peak_1219
1	33910552	33910860	wt.q.01_peak_1220
1	33933043	33933304	wt.q.01_peak_1221
1	33940631	33941248	wt.q.01_peak_1222
1	33942056	33942219	wt.q.01_peak_1223
1	33945895	33946069	wt.q.01_peak_1224
1	33946518	33947622	wt.q.01_peak_1225
1	33948371	33948543	wt.q.01_peak_1226
1	33964852	33965213	wt.q.01_peak_1227
1	33966266	33967579	wt.q.01_peak_1228
1	33980248	33980631	wt.q.01_peak_1229
1	33993845	33994707	wt.q.01_peak_1230
1	34005159	34007292	wt.q.01_peak_1231
1	34007847	34008629	wt.q.01_peak_1232
1	34009074	34009244	wt.q.01_peak_1233
1	34009874	34011470	wt.q.01_peak_1234
1	34011725	34012980	wt.q.01_peak_1235
1	34013616	34014183	wt.q.01_peak_1236
1	34015624	34016555	wt.q.01_peak_1237
1	34021511	34022055	wt.q.01_peak_1238
1	34022245	34023622	wt.q.01_peak_1239
1	34023850	34024027	wt.q.01_peak_1240
1	34024485	34024859	wt.q.01_peak_1241
1	34028225	34029373	wt.q.01_peak_1242
1	34034947	34036121	wt.q.01_peak_1243
1	34040392	34041527	wt.q.01_peak_1244
1	34043993	34044805	wt.q.01_peak_1245
1	34059455	34061260	wt.q.01_peak_1246
1	34076787	34077090	wt.q.01_peak_1247
1	34077673	34077881	wt.q.01_peak_1248
1	34093971	34094234	wt.q.01_peak_1249
1	34099472	34100388	wt.q.01_peak_1250
1	34104896	34105545	wt.q.01_peak_1251
1	34105849	34106037	wt.q.01_peak_1252
1	34110007	34110481	wt.q.01_peak_1253
1	34116679	34116916	wt.q.01_peak_1254
1	34126720	34127413	wt.q.01_peak_1255
1	34138527	34139553	wt.q.01_peak_1256
1	34142833	34143494	wt.q.01_peak_1257
1	34164685	34165099	wt.q.01_peak_1258
1	34182564	34183918	wt.q.01_peak_1259
1	34201509	34201904	wt.q.01_peak_1260
1	34212795	34213339	wt.q.01_peak_1261
1	34218542	34218840	wt.q.01_peak_1262
1	34227940	34228181	wt.q.01_peak_1263
1	34236859	34237402	wt.q.01_peak_1264
1	34258819	34258973	wt.q.01_peak_1265
1	34264896	34265556	wt.q.01_peak_1266
1	34272984	34274226	wt.q.01_peak_1267
1	34277068	34277224	wt.q.01_peak_1268
1	34285097	34285252	wt.q.01_peak_1269
1	34296177	34296352	wt.q.01_peak_1270
1	34296521	34296830	wt.q.01_peak_1271
1	34298088	34299321	wt.q.01_peak_1272
1	34300297	34301254	wt.q.01_peak_1273
1	34331046	34332413	wt.q.01_peak_1274
1	34344489	34345456	wt.q.01_peak_1275
1	34389214	34389390	wt.q.01_peak_1276
1	34409555	34410295	wt.q.01_peak_1277
1	34432725	34436099	wt.q.01_peak_1278
1	34439136	34440417	wt.q.01_peak_1279
1	34459766	34460037	wt.q.01_peak_1280
1	34571348	34571552	wt.q.01_peak_1281
1	34579034	34579525	wt.q.01_peak_1282
1	34579769	34580451	wt.q.01_peak_1283
1	34583934	34584123	wt.q.01_peak_1284
1	34654000	34654316	wt.q.01_peak_1285
1	34709134	34709770	wt.q.01_peak_1286
1	34749051	34750124	wt.q.01_peak_1287
1	34753350	34754217	wt.q.01_peak_1288
1	34779238	34780204	wt.q.01_peak_1289
1	34793432	34794023	wt.q.01_peak_1290
1	34799174	34799447	wt.q.01_peak_1291
1	34801148	34803544	wt.q.01_peak_1292
1	34804679	34805703	wt.q.01_peak_1293
1	34811502	34811920	wt.q.01_peak_1294
1	34812098	34814089	wt.q.01_peak_1295
1	34819931	34820277	wt.q.01_peak_1296
1	34822336	34824996	wt.q.01_peak_1297
1	34829191	34829617	wt.q.01_peak_1298
1	34841435	34843743	wt.q.01_peak_1299
1	34849718	34849874	wt.q.01_peak_1300
1	34851244	34852569	wt.q.01_peak_1301
1	34867066	34868181	wt.q.01_peak_1302
1	35052835	35053523	wt.q.01_peak_1303
1	35161987	35163266	wt.q.01_peak_1304
1	35180387	35182077	wt.q.01_peak_1305
1	35197630	35198076	wt.q.01_peak_1306
1	35200938	35203266	wt.q.01_peak_1307
1	35331651	35332280	wt.q.01_peak_1308
1	35359753	35359960	wt.q.01_peak_1309
1	35361212	35362123	wt.q.01_peak_1310
1	35402960	35403896	wt.q.01_peak_1311
1	35428472	35429499	wt.q.01_peak_1312
1	35523546	35524381	wt.q.01_peak_1313
1	35524562	35525187	wt.q.01_peak_1314
1	35535029	35536518	wt.q.01_peak_1315
1	35550406	35550660	wt.q.01_peak_1316
1	35550841	35551129	wt.q.01_peak_1317
1	35611579	35612159	wt.q.01_peak_1318
1	35613329	35613587	wt.q.01_peak_1319
1	35647118	35647713	wt.q.01_peak_1320
1	35674590	35675123	wt.q.01_peak_1321
1	35729944	35730101	wt.q.01_peak_1322
1	35740094	35741021	wt.q.01_peak_1323
1	35758539	35760286	wt.q.01_peak_1324
1	35849890	35850341	wt.q.01_peak_1325
1	35869401	35870186	wt.q.01_peak_1326
1	35879174	35880255	wt.q.01_peak_1327
1	35934840	35935969	wt.q.01_peak_1328
1	35950980	35951395	wt.q.01_peak_1329
1	35995256	35996125	wt.q.01_peak_1330
1	35996535	35996863	wt.q.01_peak_1331
1	36064564	36065048	wt.q.01_peak_1332
1	36065203	36065575	wt.q.01_peak_1333
1	36068028	36068214	wt.q.01_peak_1334
1	36068380	36068974	wt.q.01_peak_1335
1	36070333	36070594	wt.q.01_peak_1336
1	36072094	36072344	wt.q.01_peak_1337
1	36095007	36096343	wt.q.01_peak_1338
1	36145039	36145502	wt.q.01_peak_1339
1	36190346	36190523	wt.q.01_peak_1340
1	36191833	36192038	wt.q.01_peak_1341
1	36194149	36194531	wt.q.01_peak_1342
1	36194696	36195183	wt.q.01_peak_1343
1	36201976	36202134	wt.q.01_peak_1344
1	36207138	36207405	wt.q.01_peak_1345
1	36216458	36216689	wt.q.01_peak_1346
1	36217442	36218499	wt.q.01_peak_1347
1	36243062	36244642	wt.q.01_peak_1348
1	36303234	36303912	wt.q.01_peak_1349
1	36307313	36308409	wt.q.01_peak_1350
1	36332178	36332890	wt.q.01_peak_1351
1	36352304	36353124	wt.q.01_peak_1352
1	36368243	36369128	wt.q.01_peak_1353
1	36440110	36442067	wt.q.01_peak_1354
1	36444654	36445651	wt.q.01_peak_1355
1	36458025	36458339	wt.q.01_peak_1356
1	36470784	36472183	wt.q.01_peak_1357
1	36475303	36475478	wt.q.01_peak_1358
1	36511525	36512368	wt.q.01_peak_1359
1	36513263	36513722	wt.q.01_peak_1360
1	36514935	36515117	wt.q.01_peak_1361
1	36546697	36547218	wt.q.01_peak_1362
1	36548219	36548550	wt.q.01_peak_1363
1	36556122	36556531	wt.q.01_peak_1364
1	36557287	36557882	wt.q.01_peak_1365
1	36603358	36603573	wt.q.01_peak_1366
1	36606682	36607421	wt.q.01_peak_1367
1	36684365	36684521	wt.q.01_peak_1368
1	36691186	36691378	wt.q.01_peak_1369
1	36691586	36692191	wt.q.01_peak_1370
1	36706867	36707954	wt.q.01_peak_1371
1	36708392	36709970	wt.q.01_peak_1372
1	36710174	36710797	wt.q.01_peak_1373
1	36712256	36712439	wt.q.01_peak_1374
1	36737150	36737743	wt.q.01_peak_1375
1	36743950	36745152	wt.q.01_peak_1376
1	36784316	36785488	wt.q.01_peak_1377
1	36793514	36793676	wt.q.01_peak_1378
1	36796866	36798439	wt.q.01_peak_1379
1	36800198	36802085	wt.q.01_peak_1380
1	36812457	36813060	wt.q.01_peak_1381
1	36813230	36814564	wt.q.01_peak_1382
1	36828051	36828813	wt.q.01_peak_1383
1	36829275	36829563	wt.q.01_peak_1384
1	36831039	36832025	wt.q.01_peak_1385
1	36854689	36855170	wt.q.01_peak_1386
1	36860510	36861481	wt.q.01_peak_1387
1	36863488	36863967	wt.q.01_peak_1388
1	36864601	36865488	wt.q.01_peak_1389
1	36867181	36867352	wt.q.01_peak_1390
1	36867782	36868151	wt.q.01_peak_1391
1	36869272	36869755	wt.q.01_peak_1392
1	36871886	36872584	wt.q.01_peak_1393
1	36874339	36874563	wt.q.01_peak_1394
1	36895219	36895925	wt.q.01_peak_1395
1	36896283	36897398	wt.q.01_peak_1396
1	36901229	36901831	wt.q.01_peak_1397
1	36904287	36904534	wt.q.01_peak_1398
1	36908823	36909117	wt.q.01_peak_1399
1	36917512	36917783	wt.q.01_peak_1400
1	36920101	36921436	wt.q.01_peak_1401
1	36925707	36925891	wt.q.01_peak_1402
1	36935423	36935845	wt.q.01_peak_1403
1	36936861	36937924	wt.q.01_peak_1404
1	36938129	36939094	wt.q.01_peak_1405
1	36939446	36940540	wt.q.01_peak_1406
1	37009785	37009949	wt.q.01_peak_1407
1	37028937	37029690	wt.q.01_peak_1408
1	37031649	37031836	wt.q.01_peak_1409
1	37065421	37066797	wt.q.01_peak_1410
1	37077120	37078353	wt.q.01_peak_1411
1	37081681	37081957	wt.q.01_peak_1412
1	37088845	37089392	wt.q.01_peak_1413
1	37115306	37116491	wt.q.01_peak_1414
1	37117750	37118513	wt.q.01_peak_1415
1	37152163	37152409	wt.q.01_peak_1416
1	37220007	37220623	wt.q.01_peak_1417
1	37231358	37231949	wt.q.01_peak_1418
1	37250954	37251253	wt.q.01_peak_1419
1	37256730	37256890	wt.q.01_peak_1420
1	37272704	37273294	wt.q.01_peak_1421
1	37288044	37288842	wt.q.01_peak_1422
1	37299389	37301547	wt.q.01_peak_1423
1	37301771	37301980	wt.q.01_peak_1424
1	37310373	37311151	wt.q.01_peak_1425
1	37338801	37339586	wt.q.01_peak_1426
1	37347110	37348550	wt.q.01_peak_1427
1	37350390	37352600	wt.q.01_peak_1428
1	37353712	37354019	wt.q.01_peak_1429
1	37356441	37357271	wt.q.01_peak_1430
1	37358097	37359252	wt.q.01_peak_1431
1	37367721	37370103	wt.q.01_peak_1432
1	37376088	37376288	wt.q.01_peak_1433
1	37377605	37378711	wt.q.01_peak_1434
1	37399313	37399550	wt.q.01_peak_1435
1	37428984	37430841	wt.q.01_peak_1436
1	37496154	37496839	wt.q.01_peak_1437
1	37518558	37518813	wt.q.01_peak_1438
1	37539463	37541729	wt.q.01_peak_1439
1	37595085	37595342	wt.q.01_peak_1440
1	37601101	37601256	wt.q.01_peak_1441
1	37611445	37611618	wt.q.01_peak_1442
1	37613912	37614179	wt.q.01_peak_1443
1	37614426	37615460	wt.q.01_peak_1444
1	37628700	37629288	wt.q.01_peak_1445
1	37634485	37635071	wt.q.01_peak_1446
1	37638264	37638481	wt.q.01_peak_1447
1	37638796	37639629	wt.q.01_peak_1448
1	37653217	37653408	wt.q.01_peak_1449
1	37662139	37664044	wt.q.01_peak_1450
1	37671434	37671704	wt.q.01_peak_1451
1	37673600	37674975	wt.q.01_peak_1452
1	37675412	37675827	wt.q.01_peak_1453
1	37676577	37679692	wt.q.01_peak_1454
1	37682146	37682663	wt.q.01_peak_1455
1	37682963	37684605	wt.q.01_peak_1456
1	37686751	37688935	wt.q.01_peak_1457
1	37689207	37691629	wt.q.01_peak_1458
1	37695626	37698205	wt.q.01_peak_1459
1	37698399	37699202	wt.q.01_peak_1460
1	37700654	37701105	wt.q.01_peak_1461
1	37701316	37701659	wt.q.01_peak_1462
1	37709904	37710366	wt.q.01_peak_1463
1	37712417	37712885	wt.q.01_peak_1464
1	37715664	37715851	wt.q.01_peak_1465
1	37717278	37720208	wt.q.01_peak_1466
1	37720378	37722003	wt.q.01_peak_1467
1	37725059	37728759	wt.q.01_peak_1468
1	37729308	37730223	wt.q.01_peak_1469
1	37744552	37745685	wt.q.01_peak_1470
1	37759455	37759611	wt.q.01_peak_1471
1	37850227	37850910	wt.q.01_peak_1472
1	37862801	37866742	wt.q.01_peak_1473
1	37871642	37873562	wt.q.01_peak_1474
1	37889755	37891581	wt.q.01_peak_1475
1	37917947	37918176	wt.q.01_peak_1476
1	37996150	37998608	wt.q.01_peak_1477
1	38038775	38038966	wt.q.01_peak_1478
1	38048371	38048587	wt.q.01_peak_1479
1	38049675	38050103	wt.q.01_peak_1480
1	38057787	38058201	wt.q.01_peak_1481
1	38071236	38071947	wt.q.01_peak_1482
1	38074045	38074368	wt.q.01_peak_1483
1	38079625	38080555	wt.q.01_peak_1484
1	38088742	38089100	wt.q.01_peak_1485
1	38098016	38098747	wt.q.01_peak_1486
1	38116229	38116409	wt.q.01_peak_1487
1	38127085	38128119	wt.q.01_peak_1488
1	38128371	38128889	wt.q.01_peak_1489
1	38129731	38131447	wt.q.01_peak_1490
1	38154729	38154897	wt.q.01_peak_1491
1	38169902	38170379	wt.q.01_peak_1492
1	38185765	38185945	wt.q.01_peak_1493
1	38197448	38197746	wt.q.01_peak_1494
1	38200421	38200956	wt.q.01_peak_1495
1	38280341	38280884	wt.q.01_peak_1496
1	38288086	38289562	wt.q.01_peak_1497
1	38318554	38318781	wt.q.01_peak_1498
1	38323774	38324460	wt.q.01_peak_1499
1	38332273	38333307	wt.q.01_peak_1500
1	38335408	38336091	wt.q.01_peak_1501
1	38353594	38353785	wt.q.01_peak_1502
1	38358857	38359426	wt.q.01_peak_1503
1	38368920	38369203	wt.q.01_peak_1504
1	38369382	38370090	wt.q.01_peak_1505
1	38382671	38383253	wt.q.01_peak_1506
1	38384389	38385544	wt.q.01_peak_1507
1	38388429	38388609	wt.q.01_peak_1508
1	38392876	38393947	wt.q.01_peak_1509
1	38417957	38418991	wt.q.01_peak_1510
1	38428649	38429818	wt.q.01_peak_1511
1	38437265	38439940	wt.q.01_peak_1512
1	38446214	38447013	wt.q.01_peak_1513
1	38449098	38449380	wt.q.01_peak_1514
1	38449759	38450545	wt.q.01_peak_1515
1	38470250	38470570	wt.q.01_peak_1516
1	38478124	38478563	wt.q.01_peak_1517
1	38545162	38545795	wt.q.01_peak_1518
1	38588679	38589399	wt.q.01_peak_1519
1	38608530	38609263	wt.q.01_peak_1520
1	38620192	38620625	wt.q.01_peak_1521
1	38624784	38625155	wt.q.01_peak_1522
1	38625443	38626828	wt.q.01_peak_1523
1	38627625	38629469	wt.q.01_peak_1524
1	38632138	38633180	wt.q.01_peak_1525
1	38683158	38683891	wt.q.01_peak_1526
1	38729853	38730815	wt.q.01_peak_1527
1	38799658	38799837	wt.q.01_peak_1528
1	38803476	38803669	wt.q.01_peak_1529
1	38806482	38808034	wt.q.01_peak_1530
1	38825340	38826370	wt.q.01_peak_1531
1	38834910	38835778	wt.q.01_peak_1532
1	38836516	38837245	wt.q.01_peak_1533
1	38847074	38847425	wt.q.01_peak_1534
1	38847637	38849244	wt.q.01_peak_1535
1	38855957	38856741	wt.q.01_peak_1536
1	38896677	38898793	wt.q.01_peak_1537
1	38902908	38903157	wt.q.01_peak_1538
1	38925683	38925851	wt.q.01_peak_1539
1	38928914	38931224	wt.q.01_peak_1540
1	38971513	38973556	wt.q.01_peak_1541
1	38986976	38988676	wt.q.01_peak_1542
1	39001095	39001536	wt.q.01_peak_1543
1	39010297	39011516	wt.q.01_peak_1544
1	39012328	39014028	wt.q.01_peak_1545
1	39025374	39025588	wt.q.01_peak_1546
1	39028820	39030288	wt.q.01_peak_1547
1	39035638	39036653	wt.q.01_peak_1548
1	39063362	39065460	wt.q.01_peak_1549
1	39065674	39065833	wt.q.01_peak_1550
1	39083609	39085099	wt.q.01_peak_1551
1	39086366	39086529	wt.q.01_peak_1552
1	39089753	39090830	wt.q.01_peak_1553
1	39093172	39093505	wt.q.01_peak_1554
1	39095376	39096090	wt.q.01_peak_1555
1	39097186	39100659	wt.q.01_peak_1556
1	39102319	39104377	wt.q.01_peak_1557
1	39104781	39106667	wt.q.01_peak_1558
1	39143269	39143861	wt.q.01_peak_1559
1	39144920	39145239	wt.q.01_peak_1560
1	39151915	39152559	wt.q.01_peak_1561
1	39159830	39160421	wt.q.01_peak_1562
1	39176380	39178562	wt.q.01_peak_1563
1	39179232	39180122	wt.q.01_peak_1564
1	39186695	39186891	wt.q.01_peak_1565
1	39192677	39193457	wt.q.01_peak_1566
1	39194202	39197379	wt.q.01_peak_1567
1	39205967	39206322	wt.q.01_peak_1568
1	39206528	39207616	wt.q.01_peak_1569
1	39215039	39215682	wt.q.01_peak_1570
1	39232115	39232313	wt.q.01_peak_1571
1	39232548	39232721	wt.q.01_peak_1572
1	39235672	39236055	wt.q.01_peak_1573
1	39251358	39252129	wt.q.01_peak_1574
1	39294082	39295027	wt.q.01_peak_1575
1	39299716	39300292	wt.q.01_peak_1576
1	39306786	39308011	wt.q.01_peak_1577
1	39311666	39312967	wt.q.01_peak_1578
1	39313372	39314649	wt.q.01_peak_1579
1	39316182	39316341	wt.q.01_peak_1580
1	39317765	39319523	wt.q.01_peak_1581
1	39327290	39327722	wt.q.01_peak_1582
1	39327911	39328144	wt.q.01_peak_1583
1	39328928	39329177	wt.q.01_peak_1584
1	39336475	39336939	wt.q.01_peak_1585
1	39338434	39341140	wt.q.01_peak_1586
1	39344115	39345105	wt.q.01_peak_1587
1	39349276	39349627	wt.q.01_peak_1588
1	39365928	39369942	wt.q.01_peak_1589
1	39424481	39424982	wt.q.01_peak_1590
1	39439895	39440757	wt.q.01_peak_1591
1	39441563	39442458	wt.q.01_peak_1592
1	39445712	39447140	wt.q.01_peak_1593
1	39448526	39448813	wt.q.01_peak_1594
1	39460741	39461463	wt.q.01_peak_1595
1	39462043	39462285	wt.q.01_peak_1596
1	39477857	39479048	wt.q.01_peak_1597
1	39508304	39508499	wt.q.01_peak_1598
1	39512573	39513102	wt.q.01_peak_1599
1	39527675	39528264	wt.q.01_peak_1600
1	39530087	39530742	wt.q.01_peak_1601
1	39534666	39537554	wt.q.01_peak_1602
1	39543446	39543609	wt.q.01_peak_1603
1	39545514	39545681	wt.q.01_peak_1604
1	39547523	39547990	wt.q.01_peak_1605
1	39548424	39548601	wt.q.01_peak_1606
1	39549124	39549480	wt.q.01_peak_1607
1	39549684	39550526	wt.q.01_peak_1608
1	39551070	39551388	wt.q.01_peak_1609
1	39551674	39552075	wt.q.01_peak_1610
1	39553691	39554200	wt.q.01_peak_1611
1	39554666	39557150	wt.q.01_peak_1612
1	39557625	39558380	wt.q.01_peak_1613
1	39558614	39559820	wt.q.01_peak_1614
1	39561466	39562085	wt.q.01_peak_1615
1	39564745	39566191	wt.q.01_peak_1616
1	39567732	39567939	wt.q.01_peak_1617
1	39574549	39574959	wt.q.01_peak_1618
1	39575599	39578550	wt.q.01_peak_1619
1	39606757	39606979	wt.q.01_peak_1620
1	39614928	39615658	wt.q.01_peak_1621
1	39629862	39630177	wt.q.01_peak_1622
1	39636536	39637903	wt.q.01_peak_1623
1	39647361	39647581	wt.q.01_peak_1624
1	39648155	39651863	wt.q.01_peak_1625
1	39657165	39657480	wt.q.01_peak_1626
1	39663172	39663648	wt.q.01_peak_1627
1	39676140	39677056	wt.q.01_peak_1628
1	39685825	39686001	wt.q.01_peak_1629
1	39740849	39741191	wt.q.01_peak_1630
1	39742067	39742355	wt.q.01_peak_1631
1	39761373	39762565	wt.q.01_peak_1632
1	39824173	39825179	wt.q.01_peak_1633
1	39892837	39893124	wt.q.01_peak_1634
1	39900430	39900611	wt.q.01_peak_1635
1	39901349	39903459	wt.q.01_peak_1636
1	39923551	39924481	wt.q.01_peak_1637
1	39935508	39935844	wt.q.01_peak_1638
1	39936386	39937617	wt.q.01_peak_1639
1	39939339	39939992	wt.q.01_peak_1640
1	39940400	39940960	wt.q.01_peak_1641
1	39942759	39942979	wt.q.01_peak_1642
1	39943158	39943525	wt.q.01_peak_1643
1	39944266	39944505	wt.q.01_peak_1644
1	39946098	39947866	wt.q.01_peak_1645
1	39948873	39949072	wt.q.01_peak_1646
1	39949316	39949912	wt.q.01_peak_1647
1	39961979	39963610	wt.q.01_peak_1648
1	39964361	39965927	wt.q.01_peak_1649
1	39968864	39969603	wt.q.01_peak_1650
1	39971163	39971524	wt.q.01_peak_1651
1	39977102	39977663	wt.q.01_peak_1652
1	39978631	39978813	wt.q.01_peak_1653
1	39979826	39980810	wt.q.01_peak_1654
1	39988767	39989464	wt.q.01_peak_1655
1	39989808	39990967	wt.q.01_peak_1656
1	39994754	39994980	wt.q.01_peak_1657
1	40000616	40001366	wt.q.01_peak_1658
1	40001887	40002550	wt.q.01_peak_1659
1	40017436	40018654	wt.q.01_peak_1660
1	40020689	40022399	wt.q.01_peak_1661
1	40024579	40024777	wt.q.01_peak_1662
1	40024980	40026073	wt.q.01_peak_1663
1	40055830	40056128	wt.q.01_peak_1664
1	40084174	40084368	wt.q.01_peak_1665
1	40084529	40086408	wt.q.01_peak_1666
1	40104587	40104748	wt.q.01_peak_1667
1	40139784	40139998	wt.q.01_peak_1668
1	40209522	40209761	wt.q.01_peak_1669
1	40235180	40236384	wt.q.01_peak_1670
1	40242777	40243207	wt.q.01_peak_1671
1	40266620	40267076	wt.q.01_peak_1672
1	40275445	40275676	wt.q.01_peak_1673
1	40314133	40314464	wt.q.01_peak_1674
1	40314644	40314821	wt.q.01_peak_1675
1	40324427	40324778	wt.q.01_peak_1676
1	40358599	40359628	wt.q.01_peak_1677
1	40361318	40362193	wt.q.01_peak_1678
1	40394234	40394416	wt.q.01_peak_1679
1	40444675	40446133	wt.q.01_peak_1680
1	40502039	40502306	wt.q.01_peak_1681
1	40600389	40601445	wt.q.01_peak_1682
1	40641395	40642646	wt.q.01_peak_1683
1	40789811	40791102	wt.q.01_peak_1684
1	40825894	40826116	wt.q.01_peak_1685
1	40844592	40844784	wt.q.01_peak_1686
1	40847541	40847714	wt.q.01_peak_1687
1	40879308	40879517	wt.q.01_peak_1688
1	40887635	40888314	wt.q.01_peak_1689
1	40898169	40898917	wt.q.01_peak_1690
1	40950981	40951189	wt.q.01_peak_1691
1	41001392	41001597	wt.q.01_peak_1692
1	41001778	41002274	wt.q.01_peak_1693
1	41027024	41028819	wt.q.01_peak_1694
1	41033529	41033713	wt.q.01_peak_1695
1	41034533	41036063	wt.q.01_peak_1696
1	41036686	41037074	wt.q.01_peak_1697
1	41104534	41105302	wt.q.01_peak_1698
1	41152169	41153494	wt.q.01_peak_1699
1	41154063	41154314	wt.q.01_peak_1700
1	41158075	41158585	wt.q.01_peak_1701
1	41275616	41275800	wt.q.01_peak_1702
1	41282325	41282551	wt.q.01_peak_1703
1	41446956	41447440	wt.q.01_peak_1704
1	41590076	41590566	wt.q.01_peak_1705
1	41674354	41675165	wt.q.01_peak_1706
1	41687882	41688246	wt.q.01_peak_1707
1	41705723	41706116	wt.q.01_peak_1708
1	41744580	41744794	wt.q.01_peak_1709
1	41806005	41806281	wt.q.01_peak_1710
1	41810150	41812100	wt.q.01_peak_1711
1	41812433	41812738	wt.q.01_peak_1712
1	41819426	41821565	wt.q.01_peak_1713
1	41822098	41822376	wt.q.01_peak_1714
1	41887497	41888736	wt.q.01_peak_1715
1	41889732	41889910	wt.q.01_peak_1716
1	41890408	41890708	wt.q.01_peak_1717
1	41891230	41892674	wt.q.01_peak_1718
1	41897750	41901386	wt.q.01_peak_1719
1	41905920	41906649	wt.q.01_peak_1720
1	41909478	41909774	wt.q.01_peak_1721
1	41960385	41961164	wt.q.01_peak_1722
1	41981428	41982182	wt.q.01_peak_1723
1	42005950	42007007	wt.q.01_peak_1724
1	42007707	42008800	wt.q.01_peak_1725
1	42010742	42013689	wt.q.01_peak_1726
1	42035713	42036125	wt.q.01_peak_1727
1	42043419	42044329	wt.q.01_peak_1728
1	42069831	42070794	wt.q.01_peak_1729
1	42096868	42097747	wt.q.01_peak_1730
1	42098246	42098489	wt.q.01_peak_1731
1	42098739	42099175	wt.q.01_peak_1732
1	42125563	42125737	wt.q.01_peak_1733
1	42135077	42135281	wt.q.01_peak_1734
1	42230157	42230724	wt.q.01_peak_1735
1	42243455	42243615	wt.q.01_peak_1736
1	42250333	42250708	wt.q.01_peak_1737
1	42253219	42254820	wt.q.01_peak_1738
1	42255557	42255785	wt.q.01_peak_1739
1	42258158	42262270	wt.q.01_peak_1740
1	42263046	42263622	wt.q.01_peak_1741
1	42276620	42277201	wt.q.01_peak_1742
1	42295478	42295691	wt.q.01_peak_1743
1	42301148	42301620	wt.q.01_peak_1744
1	42302618	42302884	wt.q.01_peak_1745
1	42303042	42303610	wt.q.01_peak_1746
1	42352982	42353187	wt.q.01_peak_1747
1	42388653	42389170	wt.q.01_peak_1748
1	42396168	42396322	wt.q.01_peak_1749
1	42446535	42447190	wt.q.01_peak_1750
1	42480693	42480912	wt.q.01_peak_1751
1	42483904	42484397	wt.q.01_peak_1752
1	42485762	42486239	wt.q.01_peak_1753
1	42539597	42541126	wt.q.01_peak_1754
1	42621862	42622175	wt.q.01_peak_1755
1	42651253	42651681	wt.q.01_peak_1756
1	42651862	42652319	wt.q.01_peak_1757
1	42663003	42663475	wt.q.01_peak_1758
1	42674044	42674217	wt.q.01_peak_1759
1	42674977	42675409	wt.q.01_peak_1760
1	42680500	42681725	wt.q.01_peak_1761
1	42682619	42682799	wt.q.01_peak_1762
1	42683047	42696848	wt.q.01_peak_1763
1	42697953	42698407	wt.q.01_peak_1764
1	42698980	42705238	wt.q.01_peak_1765
1	42710508	42710707	wt.q.01_peak_1766
1	42711402	42711615	wt.q.01_peak_1767
1	42711904	42714464	wt.q.01_peak_1768
1	42714769	42715069	wt.q.01_peak_1769
1	42727065	42728321	wt.q.01_peak_1770
1	42749251	42750220	wt.q.01_peak_1771
1	42773521	42774345	wt.q.01_peak_1772
1	42815220	42815491	wt.q.01_peak_1773
1	42850737	42852031	wt.q.01_peak_1774
1	42873864	42875159	wt.q.01_peak_1775
1	42875667	42875857	wt.q.01_peak_1776
1	42899357	42899734	wt.q.01_peak_1777
1	42952284	42953132	wt.q.01_peak_1778
1	42953737	42953907	wt.q.01_peak_1779
1	42954066	42954273	wt.q.01_peak_1780
1	42954551	42954924	wt.q.01_peak_1781
1	42989708	42990441	wt.q.01_peak_1782
1	43005656	43006518	wt.q.01_peak_1783
1	43019635	43020503	wt.q.01_peak_1784
1	43091842	43092063	wt.q.01_peak_1785
1	43092675	43093638	wt.q.01_peak_1786
1	43093820	43094170	wt.q.01_peak_1787
1	43097882	43099378	wt.q.01_peak_1788
1	43112710	43113529	wt.q.01_peak_1789
1	43116443	43116644	wt.q.01_peak_1790
1	43119767	43119957	wt.q.01_peak_1791
1	43120525	43120718	wt.q.01_peak_1792
1	43130452	43131078	wt.q.01_peak_1793
1	43131359	43131536	wt.q.01_peak_1794
1	43134236	43134825	wt.q.01_peak_1795
1	43135877	43136276	wt.q.01_peak_1796
1	43136947	43143911	wt.q.01_peak_1797
1	43144622	43145524	wt.q.01_peak_1798
1	43148402	43148556	wt.q.01_peak_1799
1	43148899	43150050	wt.q.01_peak_1800
1	43150932	43151414	wt.q.01_peak_1801
1	43152125	43152317	wt.q.01_peak_1802
1	43152881	43154613	wt.q.01_peak_1803
1	43155050	43156519	wt.q.01_peak_1804
1	43156946	43157126	wt.q.01_peak_1805
1	43159059	43159413	wt.q.01_peak_1806
1	43159573	43160725	wt.q.01_peak_1807
1	43160947	43164399	wt.q.01_peak_1808
1	43164817	43164991	wt.q.01_peak_1809
1	43166619	43166815	wt.q.01_peak_1810
1	43167328	43168118	wt.q.01_peak_1811
1	43168894	43169202	wt.q.01_peak_1812
1	43178044	43179811	wt.q.01_peak_1813
1	43182760	43183203	wt.q.01_peak_1814
1	43190937	43192025	wt.q.01_peak_1815
1	43197096	43197272	wt.q.01_peak_1816
1	43198968	43200264	wt.q.01_peak_1817
1	43210501	43211092	wt.q.01_peak_1818
1	43213439	43213965	wt.q.01_peak_1819
1	43217714	43219144	wt.q.01_peak_1820
1	43221227	43221971	wt.q.01_peak_1821
1	43264262	43265038	wt.q.01_peak_1822
1	43299676	43299914	wt.q.01_peak_1823
1	43403441	43403617	wt.q.01_peak_1824
1	43426499	43426678	wt.q.01_peak_1825
1	43429577	43430120	wt.q.01_peak_1826
1	43444453	43445702	wt.q.01_peak_1827
1	43446031	43447764	wt.q.01_peak_1828
1	43463570	43465137	wt.q.01_peak_1829
1	43467620	43467823	wt.q.01_peak_1830
1	43468648	43469799	wt.q.01_peak_1831
1	43473993	43474733	wt.q.01_peak_1832
1	43486631	43488240	wt.q.01_peak_1833
1	43488812	43490203	wt.q.01_peak_1834
1	43495028	43495252	wt.q.01_peak_1835
1	43496259	43496423	wt.q.01_peak_1836
1	43500076	43500468	wt.q.01_peak_1837
1	43500707	43504613	wt.q.01_peak_1838
1	43529026	43529505	wt.q.01_peak_1839
1	43530925	43531941	wt.q.01_peak_1840
1	43535058	43536194	wt.q.01_peak_1841
1	43538477	43538648	wt.q.01_peak_1842
1	43545984	43546412	wt.q.01_peak_1843
1	43561515	43561750	wt.q.01_peak_1844
1	43561913	43562096	wt.q.01_peak_1845
1	43583564	43583863	wt.q.01_peak_1846
1	43597609	43598192	wt.q.01_peak_1847
1	43637895	43638176	wt.q.01_peak_1848
1	43732916	43733287	wt.q.01_peak_1849
1	43738105	43738273	wt.q.01_peak_1850
1	43767995	43768910	wt.q.01_peak_1851
1	43782436	43782799	wt.q.01_peak_1852
1	43782987	43783168	wt.q.01_peak_1853
1	43817883	43819788	wt.q.01_peak_1854
1	43820817	43820990	wt.q.01_peak_1855
1	43821245	43822284	wt.q.01_peak_1856
1	43825501	43826491	wt.q.01_peak_1857
1	43826687	43828520	wt.q.01_peak_1858
1	43842821	43843955	wt.q.01_peak_1859
1	43862571	43863137	wt.q.01_peak_1860
1	43868438	43869086	wt.q.01_peak_1861
1	43871399	43871816	wt.q.01_peak_1862
1	43876795	43877966	wt.q.01_peak_1863
1	43932966	43934976	wt.q.01_peak_1864
1	43952882	43954232	wt.q.01_peak_1865
1	44042053	44042335	wt.q.01_peak_1866
1	44057104	44058316	wt.q.01_peak_1867
1	44064586	44064776	wt.q.01_peak_1868
1	44101611	44102804	wt.q.01_peak_1869
1	44117932	44121464	wt.q.01_peak_1870
1	44121645	44122068	wt.q.01_peak_1871
1	44142092	44143269	wt.q.01_peak_1872
1	44143870	44144127	wt.q.01_peak_1873
1	44146809	44149160	wt.q.01_peak_1874
1	44197786	44199063	wt.q.01_peak_1875
1	44216655	44218273	wt.q.01_peak_1876
1	44218687	44219703	wt.q.01_peak_1877
1	44228811	44229178	wt.q.01_peak_1878
1	44589378	44589561	wt.q.01_peak_1879
1	44589726	44590015	wt.q.01_peak_1880
1	44596642	44597508	wt.q.01_peak_1881
1	44664068	44664361	wt.q.01_peak_1882
1	44712303	44713027	wt.q.01_peak_1883
1	44741011	44741628	wt.q.01_peak_1884
1	44914437	44914612	wt.q.01_peak_1885
1	44943962	44944280	wt.q.01_peak_1886
1	45031407	45032748	wt.q.01_peak_1887
1	45216107	45216478	wt.q.01_peak_1888
1	45309750	45310239	wt.q.01_peak_1889
1	45313732	45314119	wt.q.01_peak_1890
1	45355709	45356695	wt.q.01_peak_1891
1	45431837	45432005	wt.q.01_peak_1892
1	45472393	45473733	wt.q.01_peak_1893
1	45487947	45488949	wt.q.01_peak_1894
1	45492238	45492680	wt.q.01_peak_1895
1	45500974	45503634	wt.q.01_peak_1896
1	45599318	45600623	wt.q.01_peak_1897
1	45647004	45647634	wt.q.01_peak_1898
1	45712750	45713777	wt.q.01_peak_1899
1	45755236	45756072	wt.q.01_peak_1900
1	45760729	45761569	wt.q.01_peak_1901
1	45765883	45766336	wt.q.01_peak_1902
1	45794526	45796071	wt.q.01_peak_1903
1	45817138	45817381	wt.q.01_peak_1904
1	45825001	45825291	wt.q.01_peak_1905
1	45837722	45838982	wt.q.01_peak_1906
1	45860179	45860776	wt.q.01_peak_1907
1	45925086	45926026	wt.q.01_peak_1908
1	45985496	45985670	wt.q.01_peak_1909
1	46580592	46580952	wt.q.01_peak_1910
1	46594100	46594403	wt.q.01_peak_1911
1	46626297	46626541	wt.q.01_peak_1912
1	46683852	46684032	wt.q.01_peak_1913
1	46725842	46726308	wt.q.01_peak_1914
1	46760952	46762038	wt.q.01_peak_1915
1	46808468	46808629	wt.q.01_peak_1916
1	46815633	46815959	wt.q.01_peak_1917
1	46826151	46826328	wt.q.01_peak_1918
1	46828340	46828498	wt.q.01_peak_1919
1	46830214	46830689	wt.q.01_peak_1920
1	46837829	46838592	wt.q.01_peak_1921
1	46841253	46845114	wt.q.01_peak_1922
1	46845591	46855011	wt.q.01_peak_1923
1	46876735	46877512	wt.q.01_peak_1924
1	46905641	46905931	wt.q.01_peak_1925
1	46912139	46913361	wt.q.01_peak_1926
1	46936486	46939239	wt.q.01_peak_1927
1	46939991	46940203	wt.q.01_peak_1928
1	46963336	46967319	wt.q.01_peak_1929
1	46967907	46968267	wt.q.01_peak_1930
1	46969275	46971043	wt.q.01_peak_1931
1	46971895	46972377	wt.q.01_peak_1932
1	46981994	46984248	wt.q.01_peak_1933
1	46985012	46985217	wt.q.01_peak_1934
1	46985570	46987050	wt.q.01_peak_1935
1	46998758	47002122	wt.q.01_peak_1936
1	47003235	47004996	wt.q.01_peak_1937
1	47023667	47024103	wt.q.01_peak_1938
1	47037059	47037658	wt.q.01_peak_1939
1	47042904	47043304	wt.q.01_peak_1940
1	47050271	47052023	wt.q.01_peak_1941
1	47074596	47075096	wt.q.01_peak_1942
1	47075259	47075520	wt.q.01_peak_1943
1	47076859	47077620	wt.q.01_peak_1944
1	47079690	47080174	wt.q.01_peak_1945
1	47101932	47102259	wt.q.01_peak_1946
1	47102453	47104186	wt.q.01_peak_1947
1	47112214	47114037	wt.q.01_peak_1948
1	47183826	47184281	wt.q.01_peak_1949
1	47191146	47193967	wt.q.01_peak_1950
1	47195741	47197502	wt.q.01_peak_1951
1	47211973	47214008	wt.q.01_peak_1952
1	47214226	47214981	wt.q.01_peak_1953
1	47216721	47217560	wt.q.01_peak_1954
1	47254050	47254886	wt.q.01_peak_1955
1	47260576	47262948	wt.q.01_peak_1956
1	47263528	47263756	wt.q.01_peak_1957
1	47263997	47264284	wt.q.01_peak_1958
1	47275811	47276132	wt.q.01_peak_1959
1	47277711	47278220	wt.q.01_peak_1960
1	47285277	47286194	wt.q.01_peak_1961
1	47291640	47292721	wt.q.01_peak_1962
1	47340042	47340727	wt.q.01_peak_1963
1	47448612	47448938	wt.q.01_peak_1964
1	47462846	47463367	wt.q.01_peak_1965
1	47485582	47486976	wt.q.01_peak_1966
1	47487291	47487908	wt.q.01_peak_1967
1	47488434	47489695	wt.q.01_peak_1968
1	47619442	47619763	wt.q.01_peak_1969
1	47640867	47641299	wt.q.01_peak_1970
1	47667240	47667471	wt.q.01_peak_1971
1	47734696	47735181	wt.q.01_peak_1972
1	47809461	47810044	wt.q.01_peak_1973
1	47853551	47854427	wt.q.01_peak_1974
1	47863822	47865094	wt.q.01_peak_1975
1	47904459	47904896	wt.q.01_peak_1976
1	47961992	47962594	wt.q.01_peak_1977
1	47991134	47991853	wt.q.01_peak_1978
1	48055132	48055902	wt.q.01_peak_1979
1	48177233	48178004	wt.q.01_peak_1980
1	48275867	48276400	wt.q.01_peak_1981
1	48276560	48276752	wt.q.01_peak_1982
1	48342409	48343075	wt.q.01_peak_1983
1	48406122	48407076	wt.q.01_peak_1984
1	48604293	48604540	wt.q.01_peak_1985
1	48608608	48609742	wt.q.01_peak_1986
1	48616781	48617357	wt.q.01_peak_1987
1	48657426	48658168	wt.q.01_peak_1988
1	48893580	48894355	wt.q.01_peak_1989
1	49099087	49100132	wt.q.01_peak_1990
1	49110514	49111149	wt.q.01_peak_1991
1	50360857	50362136	wt.q.01_peak_1992
1	50517836	50518006	wt.q.01_peak_1993
1	50572060	50572956	wt.q.01_peak_1994
1	50696788	50697364	wt.q.01_peak_1995
1	50806188	50807245	wt.q.01_peak_1996
1	50843394	50843825	wt.q.01_peak_1997
1	50846771	50847470	wt.q.01_peak_1998
1	50847629	50847801	wt.q.01_peak_1999
1	50852956	50853857	wt.q.01_peak_2000
[truncated: 113,159 more rows]

## Sheet: MYT1L_CR_PFC_Peaks_Inter
1	3119433	3121774	2_wt.q.05_peak_1
1	3292351	3293298	2_wt.q.05_peak_2
1	3297422	3298470	2_wt.q.05_peak_3
1	3299469	3300147	2_wt.q.05_peak_4
1	3309553	3310426	2_wt.q.05_peak_5
1	3329971	3330341	2_wt.q.05_peak_7
1	3433088	3434642	2_wt.q.05_peak_10
1	3457607	3458273	2_wt.q.05_peak_11
1	3668891	3670544	2_wt.q.05_peak_13
1	3709986	3710628	2_wt.q.05_peak_15
1	3900285	3900959	2_wt.q.05_peak_16
1	3903076	3903950	2_wt.q.05_peak_17
1	4089997	4090342	2_wt.q.05_peak_18
1	4785895	4786381	2_wt.q.05_peak_19
1	4857054	4859031	2_wt.q.05_peak_20
1	5018234	5019675	2_wt.q.05_peak_23
1	5021812	5023315	2_wt.q.05_peak_24
1	5070450	5071671	2_wt.q.05_peak_25
1	5082520	5084062	2_wt.q.05_peak_26
1	5130041	5130721	2_wt.q.05_peak_28
1	5176921	5177786	2_wt.q.05_peak_30
1	5315607	5316470	2_wt.q.05_peak_31
1	5336410	5336959	2_wt.q.05_peak_33
1	5382223	5382850	2_wt.q.05_peak_34
1	6214081	6215721	2_wt.q.05_peak_35
1	6224100	6225047	2_wt.q.05_peak_36
1	6482787	6484336	2_wt.q.05_peak_37
1	6729535	6730837	2_wt.q.05_peak_38
1	6928201	6928691	2_wt.q.05_peak_40
1	7088551	7091557	2_wt.q.05_peak_42
1	7104541	7105923	2_wt.q.05_peak_43
1	7113188	7113609	2_wt.q.05_peak_44
1	7397488	7398270	2_wt.q.05_peak_47
1	7535012	7535274	2_wt.q.05_peak_48
1	7769246	7769536	2_wt.q.05_peak_49
1	8780814	8782282	2_wt.q.05_peak_50
1	8921569	8922590	2_wt.q.05_peak_51
1	8944549	8945110	2_wt.q.05_peak_52
1	9125460	9125893	2_wt.q.05_peak_53
1	9171830	9172777	2_wt.q.05_peak_56
1	9296163	9300502	2_wt.q.05_peak_57
1	9577718	9578450	2_wt.q.05_peak_60
1	9600626	9603702	2_wt.q.05_peak_61
1	9608642	9609837	2_wt.q.05_peak_63
1	9616144	9616753	2_wt.q.05_peak_64
1	9627116	9628542	2_wt.q.05_peak_65
1	9629844	9631166	2_wt.q.05_peak_66
1	9645239	9646081	2_wt.q.05_peak_67
1	9748105	9748414	2_wt.q.05_peak_69
1	9748694	9748987	2_wt.q.05_peak_70
1	9798583	9799880	2_wt.q.05_peak_72
1	9815490	9815882	2_wt.q.05_peak_75
1	9823374	9824922	2_wt.q.05_peak_76
1	9848317	9849162	2_wt.q.05_peak_77
1	9942994	9944402	2_wt.q.05_peak_79
1	9993487	9994306	2_wt.q.05_peak_81
1	10037496	10039481	2_wt.q.05_peak_84
1	10039791	10040985	2_wt.q.05_peak_85
1	10058323	10058918	2_wt.q.05_peak_86
1	10164423	10165135	2_wt.q.05_peak_87
1	10231125	10231950	2_wt.q.05_peak_89
1	10233210	10233749	2_wt.q.05_peak_90
1	10596393	10596837	2_wt.q.05_peak_91
1	11169590	11170292	2_wt.q.05_peak_95
1	11179543	11180373	2_wt.q.05_peak_96
1	11407048	11407382	2_wt.q.05_peak_98
1	11413377	11416192	2_wt.q.05_peak_99
1	11427142	11428135	2_wt.q.05_peak_101
1	11565792	11567139	2_wt.q.05_peak_104
1	11573331	11574044	2_wt.q.05_peak_105
1	11577721	11578891	2_wt.q.05_peak_106
1	11750337	11751407	2_wt.q.05_peak_110
1	11895567	11896025	2_wt.q.05_peak_111
1	12009086	12009612	2_wt.q.05_peak_115
1	12010347	12010610	2_wt.q.05_peak_116
1	12367109	12368519	2_wt.q.05_peak_119
1	12519295	12519899	2_wt.q.05_peak_121
1	12619725	12620688	2_wt.q.05_peak_124
1	12691542	12692255	2_wt.q.05_peak_125
1	12693128	12693402	2_wt.q.05_peak_126
1	12718308	12719053	2_wt.q.05_peak_128
1	12764212	12765077	2_wt.q.05_peak_129
1	12833088	12833722	2_wt.q.05_peak_131
1	12836551	12836944	2_wt.q.05_peak_132
1	12990527	12992980	2_wt.q.05_peak_133
1	13188094	13189358	2_wt.q.05_peak_134
1	13196542	13197783	2_wt.q.05_peak_135
1	13299425	13300024	2_wt.q.05_peak_136
1	13305302	13305932	2_wt.q.05_peak_137
1	13370784	13372784	2_wt.q.05_peak_140
1	13573833	13574655	2_wt.q.05_peak_141
1	13659976	13660790	2_wt.q.05_peak_143
1	13752307	13752750	2_wt.q.05_peak_144
1	13870082	13871365	2_wt.q.05_peak_145
1	14108882	14109342	2_wt.q.05_peak_146
1	14233631	14234791	2_wt.q.05_peak_149
1	14309478	14310927	2_wt.q.05_peak_150
1	14556155	14556602	2_wt.q.05_peak_151
1	15287218	15287823	2_wt.q.05_peak_153
1	15481331	15481823	2_wt.q.05_peak_156
1	15482933	15483886	2_wt.q.05_peak_157
1	15770616	15770930	2_wt.q.05_peak_162
1	15777136	15777420	2_wt.q.05_peak_163
1	15805805	15806777	2_wt.q.05_peak_164
1	15943278	15944111	2_wt.q.05_peak_166
1	16092025	16092673	2_wt.q.05_peak_167
1	16103706	16105020	2_wt.q.05_peak_168
1	16106318	16106775	2_wt.q.05_peak_169
1	16257836	16258820	2_wt.q.05_peak_170
1	16362445	16362850	2_wt.q.05_peak_171
1	16615181	16618615	2_wt.q.05_peak_174
1	16618960	16620369	2_wt.q.05_peak_175
1	16656060	16657516	2_wt.q.05_peak_176
1	16664892	16665846	2_wt.q.05_peak_177
1	16688218	16688719	2_wt.q.05_peak_179
1	16703341	16703889	2_wt.q.05_peak_180
1	16758891	16759591	2_wt.q.05_peak_181
1	16809623	16811437	2_wt.q.05_peak_182
1	16987243	16988415	2_wt.q.05_peak_184
1	17084432	17085791	2_wt.q.05_peak_186
1	17094454	17096869	2_wt.q.05_peak_188
1	17097710	17098953	2_wt.q.05_peak_189
1	17120790	17121154	2_wt.q.05_peak_190
1	17123006	17123534	2_wt.q.05_peak_191
1	17145426	17145842	2_wt.q.05_peak_192
1	17310660	17310963	2_wt.q.05_peak_194
1	17735407	17736179	2_wt.q.05_peak_195
1	18106429	18106881	2_wt.q.05_peak_197
1	18147744	18148993	2_wt.q.05_peak_198
1	18181561	18181928	2_wt.q.05_peak_200
1	18578477	18579207	2_wt.q.05_peak_202
1	18667036	18668945	2_wt.q.05_peak_203
1	20376232	20377012	2_wt.q.05_peak_206
1	20449728	20450065	2_wt.q.05_peak_207
1	20819625	20820759	2_wt.q.05_peak_208
1	20905788	20906301	2_wt.q.05_peak_209
1	21166405	21166867	2_wt.q.05_peak_211
1	21213863	21214551	2_wt.q.05_peak_213
1	21231554	21232716	2_wt.q.05_peak_215
1	21272277	21272622	2_wt.q.05_peak_216
1	21411170	21412489	2_wt.q.05_peak_217
1	21445727	21446320	2_wt.q.05_peak_219
1	21499826	21500339	2_wt.q.05_peak_222
1	21500674	21501277	2_wt.q.05_peak_223
1	21506458	21508327	2_wt.q.05_peak_224
1	21535269	21535792	2_wt.q.05_peak_225
1	21539138	21540333	2_wt.q.05_peak_226
1	21552454	21553590	2_wt.q.05_peak_227
1	21600537	21601157	2_wt.q.05_peak_229
1	21608178	21608694	2_wt.q.05_peak_230
1	21676318	21677653	2_wt.q.05_peak_231
1	21679061	21679920	2_wt.q.05_peak_232
1	21683750	21685316	2_wt.q.05_peak_233
1	21761128	21761726	2_wt.q.05_peak_236
1	21804580	21805417	2_wt.q.05_peak_237
1	21922302	21923379	2_wt.q.05_peak_238
1	21940853	21941224	2_wt.q.05_peak_239
1	21941496	21942277	2_wt.q.05_peak_240
1	21948210	21948708	2_wt.q.05_peak_241
1	21958786	21963674	2_wt.q.05_peak_242
1	22210336	22210665	2_wt.q.05_peak_243
1	22211171	22212070	2_wt.q.05_peak_244
1	22245691	22246420	2_wt.q.05_peak_245
1	22539641	22540022	2_wt.q.05_peak_250
1	22615316	22615838	2_wt.q.05_peak_251
1	22654612	22656698	2_wt.q.05_peak_253
1	22662105	22662820	2_wt.q.05_peak_254
1	22717325	22718577	2_wt.q.05_peak_255
1	22720640	22721657	2_wt.q.05_peak_256
1	22725596	22726667	2_wt.q.05_peak_257
1	22728136	22728733	2_wt.q.05_peak_258
1	22763369	22764018	2_wt.q.05_peak_260
1	22800394	22800682	2_wt.q.05_peak_263
1	22802576	22805125	2_wt.q.05_peak_264
1	22806784	22807139	2_wt.q.05_peak_265
1	22939715	22940487	2_wt.q.05_peak_267
1	23061685	23062479	2_wt.q.05_peak_268
1	23097955	23098926	2_wt.q.05_peak_270
1	23117643	23118186	2_wt.q.05_peak_272
1	23152096	23152755	2_wt.q.05_peak_273
1	23231071	23231857	2_wt.q.05_peak_276
1	23255518	23258299	2_wt.q.05_peak_277
1	23263889	23265128	2_wt.q.05_peak_278
1	23378526	23380810	2_wt.q.05_peak_279
1	23409427	23410410	2_wt.q.05_peak_281
1	23866717	23868109	2_wt.q.05_peak_284
1	23918865	23921566	2_wt.q.05_peak_288
1	23934695	23935511	2_wt.q.05_peak_289
1	23943078	23944049	2_wt.q.05_peak_290
1	23953495	23953931	2_wt.q.05_peak_291
1	23954220	23954521	2_wt.q.05_peak_292
1	23977041	23978307	2_wt.q.05_peak_293
1	24005053	24005636	2_wt.q.05_peak_294
1	24098525	24099110	2_wt.q.05_peak_298
1	24107406	24108439	2_wt.q.05_peak_299
1	24222730	24223383	2_wt.q.05_peak_302
1	24226499	24227531	2_wt.q.05_peak_303
1	24228996	24229908	2_wt.q.05_peak_304
1	24367853	24368176	2_wt.q.05_peak_305
1	24526978	24527498	2_wt.q.05_peak_308
1	24585983	24587557	2_wt.q.05_peak_311
1	24589139	24589611	2_wt.q.05_peak_312
1	24618074	24618744	2_wt.q.05_peak_313
1	24661391	24662340	2_wt.q.05_peak_314
1	24663966	24664777	2_wt.q.05_peak_315
1	24673060	24674236	2_wt.q.05_peak_316
1	24674763	24675070	2_wt.q.05_peak_317
1	24678439	24678738	2_wt.q.05_peak_318
1	24679326	24680148	2_wt.q.05_peak_319
1	24904418	24904963	2_wt.q.05_peak_321
1	25033635	25034349	2_wt.q.05_peak_323
1	25060471	25061747	2_wt.q.05_peak_325
1	25079163	25080027	2_wt.q.05_peak_327
1	25081319	25082866	2_wt.q.05_peak_328
1	25086127	25086642	2_wt.q.05_peak_329
1	25104621	25107033	2_wt.q.05_peak_332
1	25107343	25108614	2_wt.q.05_peak_333
1	25145854	25146375	2_wt.q.05_peak_334
1	25160797	25161227	2_wt.q.05_peak_335
1	25163330	25164139	2_wt.q.05_peak_336
1	25165417	25167193	2_wt.q.05_peak_337
1	25226035	25230081	2_wt.q.05_peak_341
1	25268846	25270019	2_wt.q.05_peak_343
1	25319239	25319969	2_wt.q.05_peak_344
1	25435639	25435944	2_wt.q.05_peak_345
1	25475609	25476524	2_wt.q.05_peak_348
1	25490476	25490759	2_wt.q.05_peak_349
1	25542699	25543573	2_wt.q.05_peak_350
1	25576072	25576899	2_wt.q.05_peak_352
1	25623187	25623708	2_wt.q.05_peak_356
1	25644011	25645037	2_wt.q.05_peak_357
1	25681762	25682930	2_wt.q.05_peak_359
1	25697273	25697642	2_wt.q.05_peak_361
1	25698238	25699713	2_wt.q.05_peak_362
1	25823292	25825044	2_wt.q.05_peak_365
1	25825874	25831754	2_wt.q.05_peak_366
1	26204756	26205068	2_wt.q.05_peak_369
1	26282583	26283713	2_wt.q.05_peak_370
1	26559323	26559892	2_wt.q.05_peak_372
1	26853427	26854278	2_wt.q.05_peak_373
1	26909607	26911109	2_wt.q.05_peak_374
1	27048156	27048887	2_wt.q.05_peak_375
1	27062435	27062753	2_wt.q.05_peak_376
1	27250646	27251174	2_wt.q.05_peak_377
1	27264302	27265407	2_wt.q.05_peak_378
1	27298281	27299074	2_wt.q.05_peak_379
1	27307118	27307480	2_wt.q.05_peak_380
1	27478288	27479484	2_wt.q.05_peak_381
1	27608288	27609237	2_wt.q.05_peak_382
1	27697432	27697842	2_wt.q.05_peak_383
1	27722249	27722940	2_wt.q.05_peak_384
1	27887061	27887766	2_wt.q.05_peak_386
1	28348725	28349126	2_wt.q.05_peak_389
1	28371118	28371562	2_wt.q.05_peak_391
1	28373241	28373900	2_wt.q.05_peak_392
1	28806541	28807341	2_wt.q.05_peak_393
1	28808125	28808593	2_wt.q.05_peak_394
1	28970663	28971532	2_wt.q.05_peak_396
1	28995184	28995952	2_wt.q.05_peak_397
1	29019130	29019798	2_wt.q.05_peak_398
1	29182474	29183500	2_wt.q.05_peak_399
1	30017274	30018632	2_wt.q.05_peak_400
1	30136569	30137072	2_wt.q.05_peak_401
1	30184790	30185074	2_wt.q.05_peak_402
1	30415622	30417431	2_wt.q.05_peak_403
1	30437754	30438731	2_wt.q.05_peak_404
1	30439020	30439490	2_wt.q.05_peak_405
1	30590802	30591148	2_wt.q.05_peak_407
1	30633046	30633443	2_wt.q.05_peak_410
1	30700621	30701808	2_wt.q.05_peak_411
1	30755117	30756497	2_wt.q.05_peak_412
1	30870086	30870601	2_wt.q.05_peak_414
1	30871326	30873042	2_wt.q.05_peak_415
1	30874109	30874384	2_wt.q.05_peak_416
1	30946662	30949271	2_wt.q.05_peak_417
1	30949821	30950132	2_wt.q.05_peak_418
1	31064801	31065713	2_wt.q.05_peak_420
1	31101017	31102080	2_wt.q.05_peak_422
1	31259956	31261048	2_wt.q.05_peak_423
1	32172185	32173185	2_wt.q.05_peak_424
1	32173498	32175676	2_wt.q.05_peak_425
1	32223620	32224790	2_wt.q.05_peak_426
1	32242781	32243103	2_wt.q.05_peak_427
1	32294283	32295261	2_wt.q.05_peak_428
1	32300981	32302226	2_wt.q.05_peak_429
1	32303352	32303962	2_wt.q.05_peak_430
1	32347228	32348401	2_wt.q.05_peak_432
1	32443668	32445798	2_wt.q.05_peak_434
1	32460329	32460993	2_wt.q.05_peak_435
1	32463137	32464005	2_wt.q.05_peak_436
1	32502782	32504077	2_wt.q.05_peak_437
1	32625900	32626526	2_wt.q.05_peak_438
1	32632682	32633969	2_wt.q.05_peak_439
1	32639420	32639834	2_wt.q.05_peak_440
1	33175396	33175936	2_wt.q.05_peak_442
1	33271347	33272145	2_wt.q.05_peak_443
1	33669861	33670313	2_wt.q.05_peak_447
1	33720002	33720718	2_wt.q.05_peak_448
1	33756618	33757324	2_wt.q.05_peak_450
1	33776040	33776815	2_wt.q.05_peak_452
1	33809338	33810135	2_wt.q.05_peak_453
1	33899939	33901056	2_wt.q.05_peak_457
1	33906623	33907538	2_wt.q.05_peak_458
1	34005501	34007085	2_wt.q.05_peak_462
1	34023073	34023593	2_wt.q.05_peak_466
1	34040573	34041144	2_wt.q.05_peak_467
1	34183160	34183794	2_wt.q.05_peak_469
1	34273121	34274160	2_wt.q.05_peak_471
1	34298127	34299150	2_wt.q.05_peak_472
1	34331417	34332274	2_wt.q.05_peak_473
1	34344574	34345329	2_wt.q.05_peak_474
1	34433443	34435711	2_wt.q.05_peak_476
1	34439451	34440361	2_wt.q.05_peak_477
1	34709159	34709659	2_wt.q.05_peak_478
1	34812419	34813992	2_wt.q.05_peak_482
1	34824097	34824878	2_wt.q.05_peak_484
1	34843115	34843602	2_wt.q.05_peak_485
1	34867526	34868067	2_wt.q.05_peak_487
1	35180417	35181913	2_wt.q.05_peak_488
1	35202329	35203166	2_wt.q.05_peak_490
1	35535022	35536487	2_wt.q.05_peak_492
1	35647371	35647661	2_wt.q.05_peak_493
1	35740359	35740930	2_wt.q.05_peak_494
1	35758780	35760041	2_wt.q.05_peak_495
1	35869725	35870158	2_wt.q.05_peak_496
1	35935232	35935759	2_wt.q.05_peak_497
1	35995257	35995783	2_wt.q.05_peak_498
1	36095306	36096343	2_wt.q.05_peak_500
1	36217759	36218232	2_wt.q.05_peak_501
1	36352699	36352963	2_wt.q.05_peak_504
1	36444791	36445371	2_wt.q.05_peak_506
1	36470971	36471368	2_wt.q.05_peak_507
1	36709495	36709872	2_wt.q.05_peak_510
1	36800321	36801936	2_wt.q.05_peak_512
1	36813480	36814050	2_wt.q.05_peak_513
1	36828460	36828756	2_wt.q.05_peak_514
1	36920358	36921181	2_wt.q.05_peak_517
1	37065627	37066447	2_wt.q.05_peak_521
1	37077558	37078158	2_wt.q.05_peak_522
1	37115635	37116088	2_wt.q.05_peak_523
1	37117861	37118449	2_wt.q.05_peak_524
1	37299417	37301273	2_wt.q.05_peak_526
1	37347312	37347913	2_wt.q.05_peak_527
1	37350896	37352104	2_wt.q.05_peak_528
1	37358810	37359093	2_wt.q.05_peak_530
1	37368064	37369086	2_wt.q.05_peak_531
1	37377732	37378704	2_wt.q.05_peak_533
1	37429413	37430740	2_wt.q.05_peak_534
1	37662145	37663096	2_wt.q.05_peak_540
1	37673847	37674823	2_wt.q.05_peak_542
1	37677248	37678412	2_wt.q.05_peak_543
1	37689523	37690406	2_wt.q.05_peak_544
1	37696669	37697597	2_wt.q.05_peak_545
1	37717313	37720208	2_wt.q.05_peak_549
1	37720534	37721847	2_wt.q.05_peak_550
1	37725343	37726967	2_wt.q.05_peak_551
1	37727258	37728131	2_wt.q.05_peak_552
1	37729285	37730001	2_wt.q.05_peak_553
1	37744657	37745337	2_wt.q.05_peak_554
1	37863627	37865935	2_wt.q.05_peak_555
1	37871935	37873335	2_wt.q.05_peak_556
1	37889837	37891083	2_wt.q.05_peak_557
1	37996150	37998208	2_wt.q.05_peak_558
1	38129801	38131105	2_wt.q.05_peak_564
1	38288253	38289564	2_wt.q.05_peak_567
1	38324066	38324358	2_wt.q.05_peak_568
1	38392899	38393741	2_wt.q.05_peak_569
1	38429260	38429720	2_wt.q.05_peak_570
1	38437903	38438436	2_wt.q.05_peak_571
1	38438793	38439510	2_wt.q.05_peak_572
1	38625521	38626126	2_wt.q.05_peak_577
1	38628015	38629423	2_wt.q.05_peak_578
1	38632483	38632924	2_wt.q.05_peak_579
1	38806834	38807974	2_wt.q.05_peak_580
1	38825896	38826357	2_wt.q.05_peak_581
1	38835155	38835504	2_wt.q.05_peak_582
1	38847628	38849182	2_wt.q.05_peak_583
1	38929238	38929958	2_wt.q.05_peak_584
1	38987050	38988587	2_wt.q.05_peak_587
1	39010450	39011193	2_wt.q.05_peak_588
1	39012231	39013989	2_wt.q.05_peak_589
1	39036068	39036365	2_wt.q.05_peak_591
1	39063985	39064846	2_wt.q.05_peak_592
1	39083850	39084674	2_wt.q.05_peak_593
1	39097371	39098521	2_wt.q.05_peak_594
1	39099172	39100082	2_wt.q.05_peak_595
1	39102898	39104181	2_wt.q.05_peak_596
1	39176597	39178114	2_wt.q.05_peak_598
1	39194499	39197341	2_wt.q.05_peak_599
1	39251481	39251820	2_wt.q.05_peak_601
1	39294256	39294997	2_wt.q.05_peak_602
1	39307023	39307689	2_wt.q.05_peak_603
1	39311878	39312441	2_wt.q.05_peak_604
1	39313810	39314649	2_wt.q.05_peak_605
1	39318295	39319437	2_wt.q.05_peak_606
1	39338765	39340575	2_wt.q.05_peak_607
1	39366178	39368133	2_wt.q.05_peak_609
1	39368805	39369610	2_wt.q.05_peak_610
1	39446084	39446781	2_wt.q.05_peak_611
1	39535109	39535719	2_wt.q.05_peak_613
1	39549832	39550096	2_wt.q.05_peak_616
1	39555318	39557087	2_wt.q.05_peak_617
1	39576195	39578235	2_wt.q.05_peak_619
1	39648711	39651756	2_wt.q.05_peak_621
1	39676227	39676627	2_wt.q.05_peak_622
1	39761550	39762411	2_wt.q.05_peak_623
1	39901170	39903060	2_wt.q.05_peak_624
1	39936465	39937374	2_wt.q.05_peak_626
1	39946277	39947278	2_wt.q.05_peak_628
1	39962954	39963458	2_wt.q.05_peak_629
1	39990332	39990621	2_wt.q.05_peak_632
1	40000885	40001344	2_wt.q.05_peak_633
1	40017528	40018595	2_wt.q.05_peak_634
1	40020760	40022203	2_wt.q.05_peak_635
1	40025229	40025882	2_wt.q.05_peak_636
1	40235437	40236312	2_wt.q.05_peak_637
1	40266631	40267052	2_wt.q.05_peak_638
1	40359015	40359276	2_wt.q.05_peak_640
1	40600407	40601110	2_wt.q.05_peak_642
1	40641996	40642510	2_wt.q.05_peak_643
1	40790150	40790970	2_wt.q.05_peak_644
1	41027412	41028635	2_wt.q.05_peak_645
1	41819975	41821255	2_wt.q.05_peak_647
1	42006102	42006748	2_wt.q.05_peak_650
1	42007797	42008199	2_wt.q.05_peak_651
1	42011991	42013601	2_wt.q.05_peak_652
1	42253139	42254638	2_wt.q.05_peak_654
1	42260600	42261212	2_wt.q.05_peak_656
1	42261684	42261978	2_wt.q.05_peak_657
1	42301245	42301548	2_wt.q.05_peak_658
1	42683872	42686101	2_wt.q.05_peak_660
1	42686892	42687267	2_wt.q.05_peak_661
1	42690312	42691027	2_wt.q.05_peak_663
1	42691429	42691993	2_wt.q.05_peak_664
1	42693352	42696838	2_wt.q.05_peak_665
1	42699039	42700658	2_wt.q.05_peak_666
1	42704109	42704516	2_wt.q.05_peak_670
1	42712541	42714369	2_wt.q.05_peak_671
1	42773789	42774066	2_wt.q.05_peak_674
1	42850884	42851351	2_wt.q.05_peak_675
1	42952514	42952781	2_wt.q.05_peak_676
1	43098995	43099265	2_wt.q.05_peak_680
1	43136991	43141347	2_wt.q.05_peak_684
1	43141986	43143837	2_wt.q.05_peak_685
1	43149188	43149653	2_wt.q.05_peak_686
1	43153325	43154052	2_wt.q.05_peak_687
1	43161130	43164117	2_wt.q.05_peak_689
1	43178294	43179337	2_wt.q.05_peak_690
1	43191025	43191964	2_wt.q.05_peak_692
1	43199022	43200112	2_wt.q.05_peak_693
1	43217990	43218967	2_wt.q.05_peak_694
1	43444867	43445253	2_wt.q.05_peak_696
1	43463680	43465134	2_wt.q.05_peak_698
1	43469234	43469734	2_wt.q.05_peak_699
1	43487085	43487680	2_wt.q.05_peak_700
1	43501455	43503255	2_wt.q.05_peak_702
1	43531036	43531908	2_wt.q.05_peak_704
1	43767762	43768201	2_wt.q.05_peak_707
1	43817981	43819187	2_wt.q.05_peak_708
1	43821290	43821804	2_wt.q.05_peak_709
1	43842893	43843647	2_wt.q.05_peak_711
1	43876873	43877827	2_wt.q.05_peak_714
1	43933196	43933875	2_wt.q.05_peak_715
1	43934337	43934872	2_wt.q.05_peak_716
1	44057361	44058221	2_wt.q.05_peak_718
1	44102167	44102763	2_wt.q.05_peak_719
1	44118315	44119452	2_wt.q.05_peak_720
1	44120040	44120326	2_wt.q.05_peak_721
1	44120694	44121384	2_wt.q.05_peak_722
1	44142370	44143155	2_wt.q.05_peak_723
1	44146901	44148918	2_wt.q.05_peak_724
1	44198004	44199075	2_wt.q.05_peak_725
1	44216832	44217740	2_wt.q.05_peak_726
1	44218733	44219451	2_wt.q.05_peak_727
1	45473011	45473637	2_wt.q.05_peak_731
1	45488048	45488373	2_wt.q.05_peak_732
1	45501148	45502268	2_wt.q.05_peak_734
1	45502561	45503420	2_wt.q.05_peak_735
1	45599561	45600575	2_wt.q.05_peak_736
1	45794984	45795576	2_wt.q.05_peak_738
1	45837865	45838750	2_wt.q.05_peak_739
1	46841440	46842439	2_wt.q.05_peak_740
1	46849377	46852774	2_wt.q.05_peak_744
1	46853584	46854529	2_wt.q.05_peak_745
1	46912380	46912884	2_wt.q.05_peak_746
1	46936532	46938635	2_wt.q.05_peak_747
1	46963582	46965289	2_wt.q.05_peak_748
1	46966637	46967041	2_wt.q.05_peak_749
1	46969680	46970794	2_wt.q.05_peak_750
1	46982171	46983719	2_wt.q.05_peak_751
1	46985652	46986562	2_wt.q.05_peak_752
1	46999130	46999877	2_wt.q.05_peak_753
1	47003621	47004392	2_wt.q.05_peak_754
1	47050606	47051928	2_wt.q.05_peak_755
1	47102670	47103556	2_wt.q.05_peak_757
1	47112250	47113903	2_wt.q.05_peak_758
1	47192434	47193826	2_wt.q.05_peak_759
1	47212140	47213910	2_wt.q.05_peak_761
1	47261231	47262004	2_wt.q.05_peak_764
1	47285381	47285715	2_wt.q.05_peak_765
1	47291972	47292574	2_wt.q.05_peak_766
1	47485941	47486645	2_wt.q.05_peak_767
1	47488734	47489465	2_wt.q.05_peak_768
1	47864144	47864417	2_wt.q.05_peak_769
1	47991407	47991801	2_wt.q.05_peak_770
1	48055268	48055563	2_wt.q.05_peak_771
1	48406174	48406857	2_wt.q.05_peak_772
1	48608790	48609742	2_wt.q.05_peak_773
1	49099210	49099502	2_wt.q.05_peak_775
1	50572287	50572949	2_wt.q.05_peak_776
1	50806590	50806865	2_wt.q.05_peak_777
1	50853150	50853725	2_wt.q.05_peak_780
1	50925066	50931566	2_wt.q.05_peak_781
1	50933357	50934908	2_wt.q.05_peak_782
1	50940140	50941354	2_wt.q.05_peak_783
1	50945359	50945773	2_wt.q.05_peak_784
1	50946560	50947479	2_wt.q.05_peak_785
1	50948315	50949208	2_wt.q.05_peak_786
1	50962533	50963104	2_wt.q.05_peak_787
1	50969494	50970438	2_wt.q.05_peak_788
1	50980219	50981903	2_wt.q.05_peak_789
1	51008155	51008701	2_wt.q.05_peak_790
1	51049152	51049693	2_wt.q.05_peak_792
1	51067754	51069331	2_wt.q.05_peak_794
1	51115581	51117066	2_wt.q.05_peak_797
1	51119777	51120324	2_wt.q.05_peak_798
1	51199044	51199893	2_wt.q.05_peak_799
1	51243343	51243963	2_wt.q.05_peak_800
1	51266984	51267758	2_wt.q.05_peak_801
1	51332788	51334835	2_wt.q.05_peak_802
1	51426216	51426482	2_wt.q.05_peak_803
1	51463337	51463815	2_wt.q.05_peak_805
1	51478178	51479031	2_wt.q.05_peak_806
1	51596697	51597056	2_wt.q.05_peak_808
1	51660791	51661224	2_wt.q.05_peak_809
1	51720148	51720653	2_wt.q.05_peak_810
1	51782786	51783246	2_wt.q.05_peak_812
1	51819696	51821036	2_wt.q.05_peak_813
1	51822109	51822611	2_wt.q.05_peak_814
1	51836776	51838763	2_wt.q.05_peak_816
1	51875289	51875835	2_wt.q.05_peak_817
1	51906327	51907439	2_wt.q.05_peak_819
1	51912851	51913195	2_wt.q.05_peak_820
1	51914770	51915193	2_wt.q.05_peak_821
1	51991896	51992899	2_wt.q.05_peak_822
1	52140467	52140993	2_wt.q.05_peak_826
1	52182739	52183673	2_wt.q.05_peak_830
1	52219744	52220228	2_wt.q.05_peak_833
1	52226300	52226895	2_wt.q.05_peak_836
1	52228565	52232051	2_wt.q.05_peak_837
1	52232849	52234254	2_wt.q.05_peak_838
1	52269354	52270375	2_wt.q.05_peak_840
1	52280040	52281212	2_wt.q.05_peak_841
1	52294261	52295278	2_wt.q.05_peak_842
1	52331321	52332167	2_wt.q.05_peak_843
1	52388072	52388391	2_wt.q.05_peak_844
1	52464815	52466018	2_wt.q.05_peak_848
1	52498886	52500185	2_wt.q.05_peak_849
1	52501030	52501391	2_wt.q.05_peak_850
1	52501667	52502733	2_wt.q.05_peak_851
1	52597373	52598125	2_wt.q.05_peak_854
1	52630346	52631295	2_wt.q.05_peak_855
1	52633181	52633740	2_wt.q.05_peak_856
1	52663261	52663755	2_wt.q.05_peak_857
1	52706923	52707384	2_wt.q.05_peak_858
1	52722530	52723186	2_wt.q.05_peak_859
1	52725864	52726550	2_wt.q.05_peak_861
1	52799232	52800890	2_wt.q.05_peak_863
1	52816088	52817237	2_wt.q.05_peak_864
1	52844418	52845616	2_wt.q.05_peak_865
1	52903855	52904899	2_wt.q.05_peak_866
1	52951244	52952442	2_wt.q.05_peak_867
1	52987061	52987587	2_wt.q.05_peak_868
1	53296456	53297830	2_wt.q.05_peak_870
1	53312881	53314176	2_wt.q.05_peak_871
1	53352291	53352925	2_wt.q.05_peak_872
1	53706695	53707106	2_wt.q.05_peak_873
1	53715717	53716098	2_wt.q.05_peak_874
1	53823139	53824630	2_wt.q.05_peak_877
1	53845225	53846999	2_wt.q.05_peak_879
1	53853031	53853528	2_wt.q.05_peak_880
1	53908867	53909757	2_wt.q.05_peak_881
1	53936360	53936855	2_wt.q.05_peak_882
1	53986301	53987453	2_wt.q.05_peak_885
1	54005620	54006378	2_wt.q.05_peak_887
1	54043116	54043621	2_wt.q.05_peak_888
1	54059571	54061583	2_wt.q.05_peak_889
1	54065214	54065732	2_wt.q.05_peak_890
1	54106759	54107188	2_wt.q.05_peak_891
1	54117731	54119788	2_wt.q.05_peak_893
1	54167419	54168706	2_wt.q.05_peak_895
1	54171521	54171957	2_wt.q.05_peak_896
1	54192203	54194374	2_wt.q.05_peak_897
1	54195024	54195475	2_wt.q.05_peak_898
1	54250164	54250627	2_wt.q.05_peak_899
1	54467271	54468553	2_wt.q.05_peak_901
1	54556054	54558223	2_wt.q.05_peak_902
1	54712755	54714105	2_wt.q.05_peak_903
1	54716710	54717600	2_wt.q.05_peak_905
1	54822027	54822602	2_wt.q.05_peak_906
1	55025747	55027657	2_wt.q.05_peak_909
1	55051864	55053605	2_wt.q.05_peak_910
1	55130917	55131876	2_wt.q.05_peak_914
1	55158551	55158989	2_wt.q.05_peak_915
1	55238613	55239657	2_wt.q.05_peak_918
1	55399655	55400312	2_wt.q.05_peak_919
1	55405396	55406214	2_wt.q.05_peak_920
1	55406634	55408224	2_wt.q.05_peak_921
1	55428737	55429574	2_wt.q.05_peak_922
1	55429847	55430771	2_wt.q.05_peak_923
1	55499539	55500640	2_wt.q.05_peak_925
1	55558556	55559221	2_wt.q.05_peak_927
1	55569814	55570434	2_wt.q.05_peak_928
1	55888298	55891523	2_wt.q.05_peak_931
1	55891920	55892910	2_wt.q.05_peak_932
1	55893284	55893953	2_wt.q.05_peak_933
1	55894495	55895177	2_wt.q.05_peak_934
1	55895786	55897521	2_wt.q.05_peak_935
1	55897785	55898155	2_wt.q.05_peak_936
1	55899453	55900457	2_wt.q.05_peak_937
1	55960236	55960923	2_wt.q.05_peak_942
1	55990626	55991067	2_wt.q.05_peak_943
1	56063165	56063553	2_wt.q.05_peak_944
1	56066312	56067035	2_wt.q.05_peak_945
1	56088737	56089598	2_wt.q.05_peak_947
1	56130854	56131539	2_wt.q.05_peak_948
1	56245315	56248850	2_wt.q.05_peak_950
1	56249163	56249485	2_wt.q.05_peak_951
1	56250116	56250496	2_wt.q.05_peak_952
1	56251135	56252509	2_wt.q.05_peak_953
1	56847503	56848008	2_wt.q.05_peak_956
1	56850467	56852145	2_wt.q.05_peak_957
1	56882186	56882580	2_wt.q.05_peak_959
1	56891454	56892016	2_wt.q.05_peak_960
1	56892480	56893667	2_wt.q.05_peak_961
1	56899414	56901300	2_wt.q.05_peak_963
1	56913655	56914382	2_wt.q.05_peak_964
1	56922291	56922728	2_wt.q.05_peak_966
1	56924813	56925173	2_wt.q.05_peak_967
1	56929024	56929623	2_wt.q.05_peak_968
1	56939334	56939621	2_wt.q.05_peak_969
1	56951479	56952329	2_wt.q.05_peak_972
1	56958285	56959024	2_wt.q.05_peak_974
1	56960178	56960712	2_wt.q.05_peak_975
1	56961510	56971581	2_wt.q.05_peak_976
1	56973155	56973821	2_wt.q.05_peak_977
1	56974121	56976361	2_wt.q.05_peak_978
1	56976980	56977537	2_wt.q.05_peak_979
1	57264829	57265825	2_wt.q.05_peak_982
1	57388060	57389975	2_wt.q.05_peak_985
1	57400592	57401864	2_wt.q.05_peak_986
1	57428523	57429374	2_wt.q.05_peak_988
1	57474869	57475526	2_wt.q.05_peak_989
1	57606303	57607275	2_wt.q.05_peak_991
1	57775656	57776287	2_wt.q.05_peak_994
1	57799067	57799811	2_wt.q.05_peak_995
1	58419995	58424434	2_wt.q.05_peak_1001
1	58444713	58446236	2_wt.q.05_peak_1002
1	58494682	58495147	2_wt.q.05_peak_1003
1	58497685	58498424	2_wt.q.05_peak_1004
1	58504714	58505583	2_wt.q.05_peak_1005
1	58568247	58569260	2_wt.q.05_peak_1006
1	58582911	58586793	2_wt.q.05_peak_1007
1	58622313	58622833	2_wt.q.05_peak_1008
1	58736864	58737550	2_wt.q.05_peak_1011
1	58739269	58740846	2_wt.q.05_peak_1012
1	58924342	58924926	2_wt.q.05_peak_1014
1	58971982	58974130	2_wt.q.05_peak_1017
1	58985073	58985583	2_wt.q.05_peak_1018
1	59162624	59163531	2_wt.q.05_peak_1020
1	59237252	59238193	2_wt.q.05_peak_1021
1	59481786	59482352	2_wt.q.05_peak_1022
1	59684287	59685570	2_wt.q.05_peak_1027
1	59764358	59765878	2_wt.q.05_peak_1029
1	59804639	59805558	2_wt.q.05_peak_1030
1	59912096	59913351	2_wt.q.05_peak_1031
1	59943913	59944664	2_wt.q.05_peak_1032
1	59945525	59946201	2_wt.q.05_peak_1033
1	59987431	59987779	2_wt.q.05_peak_1034
1	60097211	60098434	2_wt.q.05_peak_1036
1	60180036	60181134	2_wt.q.05_peak_1037
1	60342787	60344173	2_wt.q.05_peak_1038
1	60358565	60360282	2_wt.q.05_peak_1039
1	60395850	60396644	2_wt.q.05_peak_1040
1	60408167	60409291	2_wt.q.05_peak_1041
1	60410393	60411242	2_wt.q.05_peak_1042
1	60469165	60470248	2_wt.q.05_peak_1044
1	60481114	60481995	2_wt.q.05_peak_1045
1	60564364	60567472	2_wt.q.05_peak_1047
1	60625927	60626189	2_wt.q.05_peak_1049
1	60701711	60702234	2_wt.q.05_peak_1050
1	60745570	60745906	2_wt.q.05_peak_1051
1	60793600	60793860	2_wt.q.05_peak_1053
1	60795431	60796761	2_wt.q.05_peak_1054
1	60805516	60805922	2_wt.q.05_peak_1056
1	60845945	60849773	2_wt.q.05_peak_1057
1	60898117	60898867	2_wt.q.05_peak_1059
1	61042643	61043456	2_wt.q.05_peak_1062
1	61470954	61471620	2_wt.q.05_peak_1064
1	61695966	61696705	2_wt.q.05_peak_1066
1	62215871	62216721	2_wt.q.05_peak_1068
1	62562303	62562767	2_wt.q.05_peak_1069
1	62687309	62688258	2_wt.q.05_peak_1070
1	62703761	62704988	2_wt.q.05_peak_1071
1	62705653	62706903	2_wt.q.05_peak_1072
1	62790449	62790967	2_wt.q.05_peak_1073
1	62794347	62794965	2_wt.q.05_peak_1074
1	62808332	62808878	2_wt.q.05_peak_1075
1	62901399	62902127	2_wt.q.05_peak_1077
1	63114570	63115891	2_wt.q.05_peak_1080
1	63175974	63177756	2_wt.q.05_peak_1082
1	63444849	63447675	2_wt.q.05_peak_1084
1	63457555	63458361	2_wt.q.05_peak_1085
1	63459600	63461098	2_wt.q.05_peak_1086
1	63478583	63479392	2_wt.q.05_peak_1087
1	63573589	63575132	2_wt.q.05_peak_1089
1	63705769	63706578	2_wt.q.05_peak_1090
1	63730160	63731169	2_wt.q.05_peak_1093
1	63851874	63852226	2_wt.q.05_peak_1095
1	63871372	63872330	2_wt.q.05_peak_1096
1	63898826	63899310	2_wt.q.05_peak_1098
1	63909143	63909764	2_wt.q.05_peak_1099
1	63918011	63918729	2_wt.q.05_peak_1100
1	63933772	63935390	2_wt.q.05_peak_1101
1	63947455	63947799	2_wt.q.05_peak_1102
1	63964158	63965904	2_wt.q.05_peak_1103
1	64035208	64036279	2_wt.q.05_peak_1105
1	64055908	64056554	2_wt.q.05_peak_1106
1	64066413	64067819	2_wt.q.05_peak_1107
1	64073720	64074174	2_wt.q.05_peak_1108
1	64079507	64081361	2_wt.q.05_peak_1109
1	64107370	64108153	2_wt.q.05_peak_1111
1	64116482	64122277	2_wt.q.05_peak_1114
1	64364322	64364617	2_wt.q.05_peak_1115
1	64463470	64464743	2_wt.q.05_peak_1117
1	64509656	64510462	2_wt.q.05_peak_1118
1	64513886	64514878	2_wt.q.05_peak_1119
1	64531660	64532584	2_wt.q.05_peak_1121
1	64533549	64534616	2_wt.q.05_peak_1122
1	64570093	64570902	2_wt.q.05_peak_1125
1	64615652	64618289	2_wt.q.05_peak_1128
1	64633001	64633967	2_wt.q.05_peak_1130
1	64690463	64690765	2_wt.q.05_peak_1131
1	64691509	64693454	2_wt.q.05_peak_1132
1	64716742	64717708	2_wt.q.05_peak_1134
1	64791544	64792473	2_wt.q.05_peak_1136
1	64854806	64855258	2_wt.q.05_peak_1137
1	64911696	64913071	2_wt.q.05_peak_1138
1	64918677	64919746	2_wt.q.05_peak_1139
1	64978119	64978716	2_wt.q.05_peak_1141
1	65178564	65179237	2_wt.q.05_peak_1143
1	65186018	65187350	2_wt.q.05_peak_1144
1	65333676	65334942	2_wt.q.05_peak_1147
1	65538111	65539051	2_wt.q.05_peak_1148
1	65687559	65687927	2_wt.q.05_peak_1150
1	65762471	65763460	2_wt.q.05_peak_1151
1	65847567	65848396	2_wt.q.05_peak_1152
1	66175500	66176955	2_wt.q.05_peak_1155
1	66177270	66177676	2_wt.q.05_peak_1156
1	66186437	66188071	2_wt.q.05_peak_1158
1	66192629	66193785	2_wt.q.05_peak_1160
1	66196320	66197323	2_wt.q.05_peak_1161
1	66205402	66206039	2_wt.q.05_peak_1162
1	66277868	66278451	2_wt.q.05_peak_1166
1	66279258	66279931	2_wt.q.05_peak_1167
1	66292287	66293144	2_wt.q.05_peak_1168
1	66321197	66323939	2_wt.q.05_peak_1169
1	66324440	66325686	2_wt.q.05_peak_1170
1	66326267	66326771	2_wt.q.05_peak_1171
1	66364880	66366007	2_wt.q.05_peak_1174
1	66369251	66369967	2_wt.q.05_peak_1175
1	66374743	66375023	2_wt.q.05_peak_1177
1	66386571	66388075	2_wt.q.05_peak_1178
1	66395008	66395557	2_wt.q.05_peak_1180
1	66418264	66419139	2_wt.q.05_peak_1181
1	66431321	66432029	2_wt.q.05_peak_1183
1	66436569	66437041	2_wt.q.05_peak_1184
1	66438011	66438548	2_wt.q.05_peak_1185
1	66467108	66471218	2_wt.q.05_peak_1187
1	66552050	66552948	2_wt.q.05_peak_1191
1	66649458	66650428	2_wt.q.05_peak_1193
1	66654765	66655833	2_wt.q.05_peak_1194
1	66807002	66807528	2_wt.q.05_peak_1195
1	66815607	66818120	2_wt.q.05_peak_1197
1	66895930	66896289	2_wt.q.05_peak_1198
1	67033665	67034299	2_wt.q.05_peak_1200
1	67038042	67039246	2_wt.q.05_peak_1201
1	67268198	67268542	2_wt.q.05_peak_1203
1	67795424	67795921	2_wt.q.05_peak_1204
1	68134770	68135052	2_wt.q.05_peak_1205
1	68371396	68371906	2_wt.q.05_peak_1206
1	69436666	69437222	2_wt.q.05_peak_1210
1	69799094	69799572	2_wt.q.05_peak_1214
1	70385624	70386253	2_wt.q.05_peak_1215
1	70725254	70726880	2_wt.q.05_peak_1216
1	70923169	70924199	2_wt.q.05_peak_1218
1	71102087	71103363	2_wt.q.05_peak_1219
1	71215196	71215873	2_wt.q.05_peak_1220
1	71245312	71245755	2_wt.q.05_peak_1221
1	71357349	71357959	2_wt.q.05_peak_1222
1	71367434	71367840	2_wt.q.05_peak_1223
1	71845267	71845780	2_wt.q.05_peak_1225
1	71848581	71849111	2_wt.q.05_peak_1226
1	72002567	72002848	2_wt.q.05_peak_1228
1	72212277	72212748	2_wt.q.05_peak_1230
1	72225619	72225950	2_wt.q.05_peak_1231
1	72226474	72227094	2_wt.q.05_peak_1232
1	72235935	72236715	2_wt.q.05_peak_1233
1	72237067	72237550	2_wt.q.05_peak_1234
1	72244333	72244902	2_wt.q.05_peak_1235
1	72283841	72285062	2_wt.q.05_peak_1236
1	72306967	72307885	2_wt.q.05_peak_1238
1	72372308	72373376	2_wt.q.05_peak_1240
1	72439060	72439725	2_wt.q.05_peak_1241
1	72457379	72458111	2_wt.q.05_peak_1242
1	72534124	72536112	2_wt.q.05_peak_1244
1	72536438	72537664	2_wt.q.05_peak_1245
1	72578099	72578978	2_wt.q.05_peak_1246
1	72582695	72583859	2_wt.q.05_peak_1247
1	72593547	72594450	2_wt.q.05_peak_1248
1	72710771	72712280	2_wt.q.05_peak_1249
1	72869870	72874102	2_wt.q.05_peak_1250
1	73388857	73389741	2_wt.q.05_peak_1252
1	74237061	74240969	2_wt.q.05_peak_1257
1	74284367	74285517	2_wt.q.05_peak_1259
1	74386605	74387208	2_wt.q.05_peak_1261
1	74505222	74507035	2_wt.q.05_peak_1263
1	74584192	74585201	2_wt.q.05_peak_1265
1	74586734	74588672	2_wt.q.05_peak_1266
1	74600870	74601812	2_wt.q.05_peak_1267
1	74661312	74662365	2_wt.q.05_peak_1268
1	74817091	74817959	2_wt.q.05_peak_1272
1	74824529	74825895	2_wt.q.05_peak_1273
1	74829574	74830869	2_wt.q.05_peak_1275
1	74849888	74850837	2_wt.q.05_peak_1276
1	74859174	74860369	2_wt.q.05_peak_1279
1	75124809	75125216	2_wt.q.05_peak_1280
1	75141456	75142705	2_wt.q.05_peak_1282
1	75168427	75169607	2_wt.q.05_peak_1284
1	75191751	75193066	2_wt.q.05_peak_1286
1	75217552	75219567	2_wt.q.05_peak_1288
1	75262864	75265033	2_wt.q.05_peak_1291
1	75290162	75290760	2_wt.q.05_peak_1295
1	75317074	75318060	2_wt.q.05_peak_1296
1	75385959	75387483	2_wt.q.05_peak_1299
1	75458715	75459777	2_wt.q.05_peak_1302
1	75477384	75478381	2_wt.q.05_peak_1303
1	75480418	75480829	2_wt.q.05_peak_1305
1	75504099	75505520	2_wt.q.05_peak_1306
1	75521319	75522176	2_wt.q.05_peak_1307
1	75555824	75557062	2_wt.q.05_peak_1308
1	75587842	75589152	2_wt.q.05_peak_1310
1	75848014	75848934	2_wt.q.05_peak_1313
1	75873751	75874019	2_wt.q.05_peak_1314
1	75877115	75878447	2_wt.q.05_peak_1315
1	75978307	75979050	2_wt.q.05_peak_1316
1	76070282	76071637	2_wt.q.05_peak_1317
1	76219338	76219867	2_wt.q.05_peak_1320
1	76420270	76420975	2_wt.q.05_peak_1321
1	76427378	76428293	2_wt.q.05_peak_1322
1	76483535	76484732	2_wt.q.05_peak_1324
1	76487781	76488089	2_wt.q.05_peak_1325
1	76491093	76491644	2_wt.q.05_peak_1326
1	76509260	76510006	2_wt.q.05_peak_1327
1	76659886	76660715	2_wt.q.05_peak_1329
1	76821378	76822281	2_wt.q.05_peak_1330
1	76872787	76873730	2_wt.q.05_peak_1331
1	77027777	77028151	2_wt.q.05_peak_1332
1	77109770	77110641	2_wt.q.05_peak_1333
1	77410896	77412145	2_wt.q.05_peak_1336
1	77446706	77448464	2_wt.q.05_peak_1338
1	77501690	77505635	2_wt.q.05_peak_1341
1	77507472	77507864	2_wt.q.05_peak_1343
1	77513272	77516857	2_wt.q.05_peak_1347
1	77521731	77522498	2_wt.q.05_peak_1348
1	77544028	77546324	2_wt.q.05_peak_1350
1	77565656	77566432	2_wt.q.05_peak_1351
1	77567410	77568259	2_wt.q.05_peak_1352
1	77651358	77651762	2_wt.q.05_peak_1353
1	77703974	77704732	2_wt.q.05_peak_1354
1	77823714	77824928	2_wt.q.05_peak_1356
1	77895755	77896284	2_wt.q.05_peak_1358
1	78310370	78311454	2_wt.q.05_peak_1359
1	78371131	78372254	2_wt.q.05_peak_1360
1	78426081	78426555	2_wt.q.05_peak_1361
1	78488893	78489526	2_wt.q.05_peak_1362
1	78536992	78538715	2_wt.q.05_peak_1363
1	78747030	78747544	2_wt.q.05_peak_1367
1	78864180	78865562	2_wt.q.05_peak_1369
1	79336963	79337437	2_wt.q.05_peak_1370
1	79437209	79440818	2_wt.q.05_peak_1371
1	79581048	79581824	2_wt.q.05_peak_1373
1	79657377	79657967	2_wt.q.05_peak_1374
1	79710271	79711595	2_wt.q.05_peak_1377
1	79819315	79819746	2_wt.q.05_peak_1381
1	79823792	79824877	2_wt.q.05_peak_1382
1	80033699	80034534	2_wt.q.05_peak_1383
1	80073630	80074712	2_wt.q.05_peak_1385
1	80220327	80221044	2_wt.q.05_peak_1386
1	80338616	80339953	2_wt.q.05_peak_1390
1	80390573	80390938	2_wt.q.05_peak_1391
1	80472379	80472764	2_wt.q.05_peak_1392
1	80493890	80495017	2_wt.q.05_peak_1393
1	80540995	80541827	2_wt.q.05_peak_1395
1	80602792	80603560	2_wt.q.05_peak_1396
1	80618891	80619995	2_wt.q.05_peak_1398
1	80853682	80855872	2_wt.q.05_peak_1401
1	80892767	80893241	2_wt.q.05_peak_1403
1	81075895	81080222	2_wt.q.05_peak_1406
1	81080534	81081228	2_wt.q.05_peak_1407
1	81098796	81099073	2_wt.q.05_peak_1408
1	81179487	81181430	2_wt.q.05_peak_1410
1	81864400	81864946	2_wt.q.05_peak_1415
1	82283161	82285075	2_wt.q.05_peak_1417
1	82285617	82286687	2_wt.q.05_peak_1418
1	82290277	82291513	2_wt.q.05_peak_1419
1	82292460	82293233	2_wt.q.05_peak_1420
1	82293837	82294271	2_wt.q.05_peak_1421
1	82316114	82317034	2_wt.q.05_peak_1422
1	82608336	82609292	2_wt.q.05_peak_1424
1	82724497	82725877	2_wt.q.05_peak_1425
1	82737243	82738270	2_wt.q.05_peak_1427
1	82741312	82742196	2_wt.q.05_peak_1428
1	82793584	82794021	2_wt.q.05_peak_1429
1	82986419	82986916	2_wt.q.05_peak_1431
1	83076405	83076728	2_wt.q.05_peak_1435
1	83117307	83118264	2_wt.q.05_peak_1436
1	83152966	83153719	2_wt.q.05_peak_1437
1	83159258	83159643	2_wt.q.05_peak_1438
1	83168895	83169582	2_wt.q.05_peak_1439
1	83295730	83297721	2_wt.q.05_peak_1440
1	83353928	83354731	2_wt.q.05_peak_1442
1	83389086	83390235	2_wt.q.05_peak_1444
1	83394923	83396728	2_wt.q.05_peak_1445
1	83401136	83403195	2_wt.q.05_peak_1446
1	83405206	83408462	2_wt.q.05_peak_1447
1	83509355	83510195	2_wt.q.05_peak_1449
1	83527674	83528436	2_wt.q.05_peak_1450
1	83531784	83532412	2_wt.q.05_peak_1451
1	83551232	83552573	2_wt.q.05_peak_1452
1	83582544	83583601	2_wt.q.05_peak_1453
1	83588717	83589209	2_wt.q.05_peak_1454
1	83589611	83590273	2_wt.q.05_peak_1455
1	83600992	83601796	2_wt.q.05_peak_1456
1	83653330	83654627	2_wt.q.05_peak_1457
1	83664438	83664927	2_wt.q.05_peak_1458
1	83684995	83685291	2_wt.q.05_peak_1459
1	83761351	83762062	2_wt.q.05_peak_1461
1	83851010	83851759	2_wt.q.05_peak_1462
1	84086719	84087448	2_wt.q.05_peak_1463
1	84203356	84204211	2_wt.q.05_peak_1464
1	84215572	84216169	2_wt.q.05_peak_1465
1	84386577	84386859	2_wt.q.05_peak_1468
1	84427546	84428272	2_wt.q.05_peak_1470
1	84464492	84465025	2_wt.q.05_peak_1472
1	84522774	84523093	2_wt.q.05_peak_1473
1	84532783	84533176	2_wt.q.05_peak_1474
1	84777414	84778239	2_wt.q.05_peak_1479
1	84881511	84882006	2_wt.q.05_peak_1482
1	84935310	84936268	2_wt.q.05_peak_1484
1	85828791	85829541	2_wt.q.05_peak_1488
1	85870114	85871030	2_wt.q.05_peak_1489
1	85894119	85897532	2_wt.q.05_peak_1490
1	85898264	85899966	2_wt.q.05_peak_1491
1	85933332	85934211	2_wt.q.05_peak_1495
1	85952826	85954001	2_wt.q.05_peak_1496
1	85999441	86000597	2_wt.q.05_peak_1499
1	86021063	86021953	2_wt.q.05_peak_1500
1	86111719	86112423	2_wt.q.05_peak_1501
1	86154232	86154617	2_wt.q.05_peak_1502
1	86359106	86359483	2_wt.q.05_peak_1504
1	86378430	86379170	2_wt.q.05_peak_1505
1	86434248	86434852	2_wt.q.05_peak_1506
1	86440172	86443078	2_wt.q.05_peak_1507
1	86471015	86471325	2_wt.q.05_peak_1508
1	86525457	86526151	2_wt.q.05_peak_1511
1	86528423	86529161	2_wt.q.05_peak_1513
1	86581669	86583431	2_wt.q.05_peak_1516
1	86681333	86682003	2_wt.q.05_peak_1519
1	86703173	86704181	2_wt.q.05_peak_1520
1	86834859	86835801	2_wt.q.05_peak_1522
1	86913257	86914606	2_wt.q.05_peak_1524
1	86918098	86919042	2_wt.q.05_peak_1525
1	86925488	86926189	2_wt.q.05_peak_1526
1	86931451	86932030	2_wt.q.05_peak_1527
1	86985833	86986574	2_wt.q.05_peak_1528
1	87009115	87010105	2_wt.q.05_peak_1529
1	87504783	87506113	2_wt.q.05_peak_1532
1	87507097	87508911	2_wt.q.05_peak_1533
1	87518515	87518982	2_wt.q.05_peak_1536
1	87519968	87521302	2_wt.q.05_peak_1537
1	87534049	87534369	2_wt.q.05_peak_1538
1	87593783	87594577	2_wt.q.05_peak_1540
1	87603304	87604510	2_wt.q.05_peak_1542
1	87605493	87606535	2_wt.q.05_peak_1543
1	87678952	87679562	2_wt.q.05_peak_1544
1	87708666	87709613	2_wt.q.05_peak_1546
1	87732771	87734596	2_wt.q.05_peak_1547
1	87755381	87755900	2_wt.q.05_peak_1548
1	87793034	87793744	2_wt.q.05_peak_1549
1	87812777	87813855	2_wt.q.05_peak_1551
1	87854310	87856943	2_wt.q.05_peak_1554
1	87935429	87935909	2_wt.q.05_peak_1556
1	87936296	87936662	2_wt.q.05_peak_1557
1	88007928	88008882	2_wt.q.05_peak_1559
1	88718834	88719423	2_wt.q.05_peak_1561
1	89034742	89035578	2_wt.q.05_peak_1562
1	89049309	89049950	2_wt.q.05_peak_1563
1	89050334	89050667	2_wt.q.05_peak_1564
1	89069695	89070341	2_wt.q.05_peak_1566
1	89092496	89093220	2_wt.q.05_peak_1568
1	89163845	89164392	2_wt.q.05_peak_1569
1	90203815	90205436	2_wt.q.05_peak_1576
1	90275225	90276397	2_wt.q.05_peak_1578
1	90284149	90284866	2_wt.q.05_peak_1579
1	90347277	90347655	2_wt.q.05_peak_1580
1	90356865	90358256	2_wt.q.05_peak_1583
1	90603079	90603740	2_wt.q.05_peak_1585
1	90974674	90975234	2_wt.q.05_peak_1589
1	90980559	90981234	2_wt.q.05_peak_1590
1	91062442	91062886	2_wt.q.05_peak_1593
1	91085671	91087148	2_wt.q.05_peak_1594
1	91187292	91188192	2_wt.q.05_peak_1596
1	91188814	91189231	2_wt.q.05_peak_1597
1	91204038	91205236	2_wt.q.05_peak_1598
1	91206675	91207782	2_wt.q.05_peak_1599
1	91209623	91210045	2_wt.q.05_peak_1600
1	91249618	91250168	2_wt.q.05_peak_1601
1	91297921	91298189	2_wt.q.05_peak_1602
1	91332008	91333080	2_wt.q.05_peak_1603
1	91445219	91445713	2_wt.q.05_peak_1606
1	91457423	91458948	2_wt.q.05_peak_1607
1	91879711	91881573	2_wt.q.05_peak_1608
1	92056828	92057230	2_wt.q.05_peak_1615
1	92178201	92179455	2_wt.q.05_peak_1617
1	92180305	92180868	2_wt.q.05_peak_1618
1	92299038	92300021	2_wt.q.05_peak_1621
1	92309599	92310520	2_wt.q.05_peak_1622
1	92726167	92726787	2_wt.q.05_peak_1626
1	92903620	92904200	2_wt.q.05_peak_1628
1	92909886	92910508	2_wt.q.05_peak_1630
1	92934401	92934670	2_wt.q.05_peak_1631
1	93071191	93071969	2_wt.q.05_peak_1633
1	93101145	93101851	2_wt.q.05_peak_1636
1	93342415	93343843	2_wt.q.05_peak_1637
1	93445419	93445962	2_wt.q.05_peak_1640
1	93478035	93479166	2_wt.q.05_peak_1641
1	93577169	93577541	2_wt.q.05_peak_1642
1	93577824	93578379	2_wt.q.05_peak_1643
1	93699035	93699340	2_wt.q.05_peak_1646
1	93801496	93802557	2_wt.q.05_peak_1649
1	93803580	93804534	2_wt.q.05_peak_1650
1	93825245	93825853	2_wt.q.05_peak_1651
1	94000943	94001508	2_wt.q.05_peak_1652
1	94054015	94054318	2_wt.q.05_peak_1654
1	94183606	94184286	2_wt.q.05_peak_1655
1	94263257	94263526	2_wt.q.05_peak_1656
1	94355257	94355586	2_wt.q.05_peak_1657
1	95048448	95049055	2_wt.q.05_peak_1658
1	95313020	95313828	2_wt.q.05_peak_1661
1	95314115	95315000	2_wt.q.05_peak_1662
1	95315356	95316895	2_wt.q.05_peak_1663
1	95341892	95342968	2_wt.q.05_peak_1664
1	95666037	95668442	2_wt.q.05_peak_1665
1	96423749	96424062	2_wt.q.05_peak_1667
1	96768182	96768523	2_wt.q.05_peak_1668
1	96871114	96873125	2_wt.q.05_peak_1670
1	97552493	97553867	2_wt.q.05_peak_1671
1	97554681	97555800	2_wt.q.05_peak_1672
1	97600079	97601140	2_wt.q.05_peak_1673
1	97614665	97615884	2_wt.q.05_peak_1674
1	97623954	97624988	2_wt.q.05_peak_1676
1	97628136	97628612	2_wt.q.05_peak_1678
1	97632280	97632575	2_wt.q.05_peak_1680
1	97636988	97637810	2_wt.q.05_peak_1681
1	97642246	97642800	2_wt.q.05_peak_1682
1	97649747	97653776	2_wt.q.05_peak_1684
1	97656020	97662907	2_wt.q.05_peak_1685
1	97752841	97753781	2_wt.q.05_peak_1687
1	97761004	97761555	2_wt.q.05_peak_1688
1	97767571	97768398	2_wt.q.05_peak_1689
1	97768804	97770791	2_wt.q.05_peak_1690
1	97809486	97809918	2_wt.q.05_peak_1692
1	97827813	97828582	2_wt.q.05_peak_1693
1	97862789	97863887	2_wt.q.05_peak_1695
1	97904497	97905176	2_wt.q.05_peak_1698
1	97916005	97917093	2_wt.q.05_peak_1699
1	97929426	97929727	2_wt.q.05_peak_1700
1	97960391	97961238	2_wt.q.05_peak_1701
1	97961599	97962755	2_wt.q.05_peak_1702
1	97975045	97978695	2_wt.q.05_peak_1705
1	98002611	98003560	2_wt.q.05_peak_1706
1	98046302	98048106	2_wt.q.05_peak_1708
1	98048391	98048902	2_wt.q.05_peak_1709
1	98119570	98120113	2_wt.q.05_peak_1711
1	98163462	98164070	2_wt.q.05_peak_1713
1	98189961	98191125	2_wt.q.05_peak_1714
1	98191813	98192692	2_wt.q.05_peak_1715
1	98268774	98269099	2_wt.q.05_peak_1716
1	98275299	98276137	2_wt.q.05_peak_1717
1	98303045	98303885	2_wt.q.05_peak_1719
1	98924068	98925634	2_wt.q.05_peak_1720
1	99069151	99070227	2_wt.q.05_peak_1721
1	99199609	99199982	2_wt.q.05_peak_1722
1	99285506	99285921	2_wt.q.05_peak_1723
1	99499014	99499315	2_wt.q.05_peak_1725
1	99772340	99774734	2_wt.q.05_peak_1727
1	99871232	99872003	2_wt.q.05_peak_1729
1	100842755	100843445	2_wt.q.05_peak_1735
1	101157940	101158212	2_wt.q.05_peak_1736
1	101259756	101260363	2_wt.q.05_peak_1737
1	101807694	101808391	2_wt.q.05_peak_1738
1	102138756	102139640	2_wt.q.05_peak_1739
1	102185810	102186073	2_wt.q.05_peak_1740
1	102899001	102899674	2_wt.q.05_peak_1742
1	103181150	103181449	2_wt.q.05_peak_1743
1	104108010	104108606	2_wt.q.05_peak_1747
1	104226133	104227764	2_wt.q.05_peak_1748
1	104241171	104242230	2_wt.q.05_peak_1749
1	104772963	104773469	2_wt.q.05_peak_1752
1	104928257	104928521	2_wt.q.05_peak_1753
1	105067612	105068512	2_wt.q.05_peak_1754
1	105084800	105085283	2_wt.q.05_peak_1755
1	105093698	105095276	2_wt.q.05_peak_1756
1	105223568	105224024	2_wt.q.05_peak_1757
1	105550091	105550767	2_wt.q.05_peak_1762
1	105580187	105581632	2_wt.q.05_peak_1763
1	105662903	105664279	2_wt.q.05_peak_1765
1	105711106	105711653	2_wt.q.05_peak_1770
1	105742344	105743055	2_wt.q.05_peak_1771
1	105944970	105945593	2_wt.q.05_peak_1775
1	105946873	105947193	2_wt.q.05_peak_1776
1	105989450	105990780	2_wt.q.05_peak_1777
1	105991804	105993209	2_wt.q.05_peak_1778
1	105993507	105994710	2_wt.q.05_peak_1779
1	106170867	106171860	2_wt.q.05_peak_1781
1	106173726	106175051	2_wt.q.05_peak_1782
1	106352530	106353779	2_wt.q.05_peak_1789
1	106607378	106608431	2_wt.q.05_peak_1791
1	106687531	106688454	2_wt.q.05_peak_1792
1	106712971	106713696	2_wt.q.05_peak_1795
1	106758307	106761215	2_wt.q.05_peak_1798
1	106796252	106797283	2_wt.q.05_peak_1800
1	106865619	106867000	2_wt.q.05_peak_1801
1	107581102	107581957	2_wt.q.05_peak_1803
1	107582664	107583453	2_wt.q.05_peak_1804
1	107589197	107591657	2_wt.q.05_peak_1805
1	107645407	107646114	2_wt.q.05_peak_1808
1	107728419	107728887	2_wt.q.05_peak_1809
1	107914392	107914691	2_wt.q.05_peak_1811
1	107985613	107986408	2_wt.q.05_peak_1813
1	108389531	108390829	2_wt.q.05_peak_1814
1	109981575	109983557	2_wt.q.05_peak_1817
1	109984044	109985501	2_wt.q.05_peak_1818
1	109985786	109986900	2_wt.q.05_peak_1819
1	110004639	110005508	2_wt.q.05_peak_1821
1	110067418	110068281	2_wt.q.05_peak_1822
1	110078245	110078914	2_wt.q.05_peak_1823
1	110117799	110118539	2_wt.q.05_peak_1824
1	110474557	110475218	2_wt.q.05_peak_1825
1	110483181	110484116	2_wt.q.05_peak_1826
1	110724739	110725635	2_wt.q.05_peak_1827
1	111796307	111796664	2_wt.q.05_peak_1828
1	111834114	111834557	2_wt.q.05_peak_1829
1	111863425	111865481	2_wt.q.05_peak_1830
1	113372450	113373723	2_wt.q.05_peak_1831
1	113549942	113551013	2_wt.q.05_peak_1832
1	114063378	114063680	2_wt.q.05_peak_1833
1	114681113	114681393	2_wt.q.05_peak_1834
1	114860723	114861433	2_wt.q.05_peak_1835
1	115673000	115673893	2_wt.q.05_peak_1837
1	115684717	115687640	2_wt.q.05_peak_1838
1	115734885	115735526	2_wt.q.05_peak_1839
1	115841180	115841527	2_wt.q.05_peak_1841
1	115851959	115852955	2_wt.q.05_peak_1842
1	116243223	116244586	2_wt.q.05_peak_1846
1	116409688	116410330	2_wt.q.05_peak_1847
1	116475847	116477125	2_wt.q.05_peak_1848
1	118311065	118311451	2_wt.q.05_peak_1850
1	118388051	118389656	2_wt.q.05_peak_1851
1	118390078	118390470	2_wt.q.05_peak_1852
1	118457500	118457892	2_wt.q.05_peak_1853
1	118458156	118460440	2_wt.q.05_peak_1854
1	118480821	118482405	2_wt.q.05_peak_1855
1	118542644	118543003	2_wt.q.05_peak_1856
1	118810630	118811022	2_wt.q.05_peak_1857
1	119504213	119505336	2_wt.q.05_peak_1859
1	119557773	119558159	2_wt.q.05_peak_1860
1	119605322	119606272	2_wt.q.05_peak_1861
1	119734667	119735724	2_wt.q.05_peak_1863
1	119784939	119785207	2_wt.q.05_peak_1864
1	119818724	119819096	2_wt.q.05_peak_1865
1	119835830	119836887	2_wt.q.05_peak_1866
1	119837174	119837567	2_wt.q.05_peak_1867
1	119997289	119997676	2_wt.q.05_peak_1868
1	120120307	120121819	2_wt.q.05_peak_1869
1	120124938	120125486	2_wt.q.05_peak_1870
1	120136449	120137154	2_wt.q.05_peak_1871
1	120190842	120191223	2_wt.q.05_peak_1872
1	121290317	121290987	2_wt.q.05_peak_1874
1	121326913	121328648	2_wt.q.05_peak_1875
1	121430609	121431764	2_wt.q.05_peak_1876
1	121435963	121436643	2_wt.q.05_peak_1877
1	121478477	121479156	2_wt.q.05_peak_1878
1	121547069	121547671	2_wt.q.05_peak_1879
1	121567493	121568321	2_wt.q.05_peak_1880
1	121653839	121654371	2_wt.q.05_peak_1882
1	121798545	121799079	2_wt.q.05_peak_1883
1	121990685	121991139	2_wt.q.05_peak_1884
1	122043696	122044405	2_wt.q.05_peak_1885
1	122048068	122049199	2_wt.q.05_peak_1886
1	122061611	122062871	2_wt.q.05_peak_1887
1	122346850	122347290	2_wt.q.05_peak_1891
1	122393893	122394268	2_wt.q.05_peak_1892
1	122396184	122397156	2_wt.q.05_peak_1893
1	123028661	123029234	2_wt.q.05_peak_1895
1	123074959	123075557	2_wt.q.05_peak_1896
1	123337712	123338471	2_wt.q.05_peak_1897
1	123611722	123612358	2_wt.q.05_peak_1898
1	123614480	123614931	2_wt.q.05_peak_1899
1	123628434	123629039	2_wt.q.05_peak_1900
1	123633000	123633602	2_wt.q.05_peak_1901
1	123755796	123756475	2_wt.q.05_peak_1902
1	123901137	123901684	2_wt.q.05_peak_1904
1	123927882	123928146	2_wt.q.05_peak_1906
1	123985512	123986064	2_wt.q.05_peak_1907
1	124031611	124032062	2_wt.q.05_peak_1908
1	124035689	124036924	2_wt.q.05_peak_1909
1	124041212	124041748	2_wt.q.05_peak_1910
1	124043480	124043782	2_wt.q.05_peak_1911
1	124044280	124045399	2_wt.q.05_peak_1912
1	124156404	124156966	2_wt.q.05_peak_1915
1	124438902	124440035	2_wt.q.05_peak_1917
1	124510377	124511002	2_wt.q.05_peak_1918
1	124775709	124776177	2_wt.q.05_peak_1920
1	124777407	124778545	2_wt.q.05_peak_1921
1	124804825	124806280	2_wt.q.05_peak_1923
1	124825445	124826475	2_wt.q.05_peak_1925
1	124843065	124846399	2_wt.q.05_peak_1926
1	125290230	125291103	2_wt.q.05_peak_1928
1	125295237	125295774	2_wt.q.05_peak_1929
1	125433895	125435160	2_wt.q.05_peak_1930
1	125435472	125436701	2_wt.q.05_peak_1931
1	125559895	125560229	2_wt.q.05_peak_1933
1	125560574	125560862	2_wt.q.05_peak_1934
1	126132276	126133050	2_wt.q.05_peak_1935
1	126264644	126265471	2_wt.q.05_peak_1936
1	126317401	126318327	2_wt.q.05_peak_1937
1	126331942	126332317	2_wt.q.05_peak_1938
1	126470078	126470603	2_wt.q.05_peak_1939
1	127152854	127153298	2_wt.q.05_peak_1941
1	127204961	127205244	2_wt.q.05_peak_1942
1	127424610	127425689	2_wt.q.05_peak_1946
1	127439458	127440320	2_wt.q.05_peak_1948
1	127773448	127776587	2_wt.q.05_peak_1949
1	127788647	127788948	2_wt.q.05_peak_1950
1	127795224	127796182	2_wt.q.05_peak_1951
1	127806441	127807087	2_wt.q.05_peak_1952
1	127812581	127813497	2_wt.q.05_peak_1953
1	127826985	127827482	2_wt.q.05_peak_1954
1	127868622	127869643	2_wt.q.05_peak_1956
1	127933349	127935367	2_wt.q.05_peak_1960
1	127936562	127938176	2_wt.q.05_peak_1961
1	127946011	127947566	2_wt.q.05_peak_1963
1	127954554	127955215	2_wt.q.05_peak_1964
1	127974512	127976598	2_wt.q.05_peak_1966
1	127993493	127994084	2_wt.q.05_peak_1968
1	128003871	128004471	2_wt.q.05_peak_1969
1	128019901	128020597	2_wt.q.05_peak_1972
1	128030870	128032342	2_wt.q.05_peak_1973
1	128072679	128073570	2_wt.q.05_peak_1975
1	128076967	128078722	2_wt.q.05_peak_1977
1	128081910	128082624	2_wt.q.05_peak_1979
1	128102134	128105451	2_wt.q.05_peak_1980
1	128125338	128125960	2_wt.q.05_peak_1983
1	128140015	128145546	2_wt.q.05_peak_1986
1	128146669	128148028	2_wt.q.05_peak_1987
1	128227288	128227734	2_wt.q.05_peak_1992
1	128243572	128246006	2_wt.q.05_peak_1993
1	128359564	128361097	2_wt.q.05_peak_1994
1	128416750	128417063	2_wt.q.05_peak_1995
1	128592224	128593000	2_wt.q.05_peak_1996
1	128786882	128788520	2_wt.q.05_peak_1998
1	129169945	129170521	2_wt.q.05_peak_1999
1	129421249	129422148	2_wt.q.05_peak_2003
1	129484131	129484877	2_wt.q.05_peak_2005
1	129520679	129521100	2_wt.q.05_peak_2006
1	129602092	129602858	2_wt.q.05_peak_2007
1	129634806	129635589	2_wt.q.05_peak_2008
1	130462572	130462924	2_wt.q.05_peak_2011
1	130715112	130717295	2_wt.q.05_peak_2012
1	131074229	131075088	2_wt.q.05_peak_2016
1	131086066	131086689	2_wt.q.05_peak_2017
1	131097913	131098302	2_wt.q.05_peak_2020
1	131115922	131117384	2_wt.q.05_peak_2022
1	131118671	131119296	2_wt.q.05_peak_2023
1	131135410	131136127	2_wt.q.05_peak_2024
1	131136773	131138896	2_wt.q.05_peak_2025
1	131185925	131186346	2_wt.q.05_peak_2029
1	131246363	131247172	2_wt.q.05_peak_2030
1	131293113	131294275	2_wt.q.05_peak_2031
1	131330835	131331804	2_wt.q.05_peak_2032
1	131378692	131379777	2_wt.q.05_peak_2035
1	131398079	131398355	2_wt.q.05_peak_2036
1	131432203	131432679	2_wt.q.05_peak_2039
1	131452639	131453070	2_wt.q.05_peak_2040
1	131496664	131497735	2_wt.q.05_peak_2044
1	131519652	131520665	2_wt.q.05_peak_2045
1	131525407	131527864	2_wt.q.05_peak_2047
1	131770441	131771215	2_wt.q.05_peak_2050
1	131820808	131821638	2_wt.q.05_peak_2051
1	131827322	131828457	2_wt.q.05_peak_2053
1	131828772	131829387	2_wt.q.05_peak_2054
1	131866675	131868003	2_wt.q.05_peak_2055
1	131910089	131911716	2_wt.q.05_peak_2056
1	132007124	132008874	2_wt.q.05_peak_2057
1	132064906	132066145	2_wt.q.05_peak_2060
1	132143990	132144306	2_wt.q.05_peak_2061
1	132199539	132200980	2_wt.q.05_peak_2064
1	132202444	132203237	2_wt.q.05_peak_2065
1	132267975	132269010	2_wt.q.05_peak_2068
1	132418048	132418394	2_wt.q.05_peak_2073
1	132541677	132542141	2_wt.q.05_peak_2075
1	132591374	132591770	2_wt.q.05_peak_2076
1	132623588	132624103	2_wt.q.05_peak_2077
1	132746068	132746441	2_wt.q.05_peak_2084
1	132780053	132780433	2_wt.q.05_peak_2086
1	132817046	132818136	2_wt.q.05_peak_2087
1	132884500	132885010	2_wt.q.05_peak_2089
1	132892988	132894265	2_wt.q.05_peak_2091
1	132915678	132916208	2_wt.q.05_peak_2092
1	132983011	132983485	2_wt.q.05_peak_2093
1	133025451	133025794	2_wt.q.05_peak_2094
1	133033411	133034289	2_wt.q.05_peak_2095
1	133130650	133132430	2_wt.q.05_peak_2097
1	133181442	133181737	2_wt.q.05_peak_2103
1	133226174	133227741	2_wt.q.05_peak_2106
1	133237614	133238373	2_wt.q.05_peak_2107
1	133238905	133239659	2_wt.q.05_peak_2108
1	133332567	133333538	2_wt.q.05_peak_2110
1	133364016	133364458	2_wt.q.05_peak_2111
1	133368402	133368727	2_wt.q.05_peak_2112
1	133654779	133656063	2_wt.q.05_peak_2116
1	133660976	133661878	2_wt.q.05_peak_2118
1	133842128	133843208	2_wt.q.05_peak_2123
1	133854578	133856142	2_wt.q.05_peak_2124
1	133896540	133897450	2_wt.q.05_peak_2125
1	133908244	133909044	2_wt.q.05_peak_2126
1	134062300	134062830	2_wt.q.05_peak_2128
1	134078056	134079611	2_wt.q.05_peak_2129
1	134228924	134229812	2_wt.q.05_peak_2132
1	134240976	134241291	2_wt.q.05_peak_2134
1	134273383	134274491	2_wt.q.05_peak_2135
1	134344893	134345181	2_wt.q.05_peak_2136
1	134405722	134406130	2_wt.q.05_peak_2137
1	134414803	134415664	2_wt.q.05_peak_2138
1	134494646	134495272	2_wt.q.05_peak_2140
1	134556832	134557358	2_wt.q.05_peak_2141
1	134585557	134586261	2_wt.q.05_peak_2143
1	134625151	134625479	2_wt.q.05_peak_2144
1	134638270	134638606	2_wt.q.05_peak_2147
1	134770634	134770898	2_wt.q.05_peak_2148
1	134909067	134910162	2_wt.q.05_peak_2153
1	134955633	134956728	2_wt.q.05_peak_2156
1	135145626	135146700	2_wt.q.05_peak_2158
1	135284102	135284415	2_wt.q.05_peak_2160
1	135313417	135314076	2_wt.q.05_peak_2162
1	135368100	135369041	2_wt.q.05_peak_2163
1	135373262	135374519	2_wt.q.05_peak_2164
1	135380270	135381412	2_wt.q.05_peak_2166
1	135383802	135384725	2_wt.q.05_peak_2167
1	135429659	135431028	2_wt.q.05_peak_2171
1	135544124	135544933	2_wt.q.05_peak_2173
1	135566854	135567504	2_wt.q.05_peak_2175
1	135572068	135572943	2_wt.q.05_peak_2176
1	135582981	135583662	2_wt.q.05_peak_2177
1	135699148	135700798	2_wt.q.05_peak_2179
1	135728528	135729308	2_wt.q.05_peak_2180
1	135946505	135947041	2_wt.q.05_peak_2181
1	136017532	136019121	2_wt.q.05_peak_2182
1	136050029	136050677	2_wt.q.05_peak_2183
1	136055634	136056200	2_wt.q.05_peak_2184
1	136128223	136128835	2_wt.q.05_peak_2189
1	136130832	136133464	2_wt.q.05_peak_2191
1	136133864	136134243	2_wt.q.05_peak_2192
1	136139633	136140746	2_wt.q.05_peak_2193
1	136142636	136144071	2_wt.q.05_peak_2194
1	136315606	136316452	2_wt.q.05_peak_2196
1	136346261	136346698	2_wt.q.05_peak_2200
1	136401271	136402192	2_wt.q.05_peak_2202
1	136414235	136416176	2_wt.q.05_peak_2203
1	136417666	136418994	2_wt.q.05_peak_2204
1	136465657	136466097	2_wt.q.05_peak_2206
1	136470370	136471171	2_wt.q.05_peak_2207
1	136613021	136613910	2_wt.q.05_peak_2211
1	136623813	136625309	2_wt.q.05_peak_2212
1	136625586	136626431	2_wt.q.05_peak_2213
1	136627737	136629817	2_wt.q.05_peak_2215
1	136630713	136631427	2_wt.q.05_peak_2216
1	136664700	136665363	2_wt.q.05_peak_2217
1	136683445	136684331	2_wt.q.05_peak_2218
1	136713745	136714863	2_wt.q.05_peak_2219
1	136739235	136739602	2_wt.q.05_peak_2221
1	137074609	137075241	2_wt.q.05_peak_2222
1	137331697	137333037	2_wt.q.05_peak_2223
1	137363299	137363668	2_wt.q.05_peak_2224
1	137427878	137428725	2_wt.q.05_peak_2225
1	137473511	137474449	2_wt.q.05_peak_2226
1	137545637	137546438	2_wt.q.05_peak_2227
1	137584302	137584609	2_wt.q.05_peak_2228
1	137617393	137618323	2_wt.q.05_peak_2230
1	137653745	137654666	2_wt.q.05_peak_2231
1	137664317	137665464	2_wt.q.05_peak_2232
1	137669938	137671445	2_wt.q.05_peak_2233
1	137788732	137789249	2_wt.q.05_peak_2234
1	137897992	137902146	2_wt.q.05_peak_2235
1	137902447	137905277	2_wt.q.05_peak_2236
1	137905747	137907263	2_wt.q.05_peak_2237
1	137909908	137910893	2_wt.q.05_peak_2238
1	137921063	137923494	2_wt.q.05_peak_2240
1	137955106	137955836	2_wt.q.05_peak_2242
1	137965728	137966160	2_wt.q.05_peak_2244
1	137972502	137973444	2_wt.q.05_peak_2246
1	138006617	138007151	2_wt.q.05_peak_2247
1	138136414	138137064	2_wt.q.05_peak_2249
1	138148288	138149671	2_wt.q.05_peak_2250
1	138289635	138290535	2_wt.q.05_peak_2251
1	138596559	138597079	2_wt.q.05_peak_2253
1	138618762	138619544	2_wt.q.05_peak_2255
1	138962337	138963270	2_wt.q.05_peak_2257
1	138964248	138964658	2_wt.q.05_peak_2258
1	138970118	138970796	2_wt.q.05_peak_2259
1	138995435	138996355	2_wt.q.05_peak_2261
1	139008604	139009438	2_wt.q.05_peak_2262
1	139424407	139424704	2_wt.q.05_peak_2266
1	140171489	140172205	2_wt.q.05_peak_2268
1	140245471	140247895	2_wt.q.05_peak_2270
1	140273528	140274166	2_wt.q.05_peak_2273
1	140277400	140277721	2_wt.q.05_peak_2274
1	140294383	140296534	2_wt.q.05_peak_2275
1	140310369	140310866	2_wt.q.05_peak_2276
1	140338403	140339905	2_wt.q.05_peak_2277
1	140397516	140398209	2_wt.q.05_peak_2278
1	140409337	140410315	2_wt.q.05_peak_2279
1	140434750	140435352	2_wt.q.05_peak_2281
1	140437852	140438690	2_wt.q.05_peak_2282
1	140456094	140457733	2_wt.q.05_peak_2283
1	140482708	140483208	2_wt.q.05_peak_2285
1	140489418	140493062	2_wt.q.05_peak_2286
1	140531206	140532118	2_wt.q.05_peak_2288
1	140561109	140561519	2_wt.q.05_peak_2289
1	140660902	140661865	2_wt.q.05_peak_2291
1	140872554	140873429	2_wt.q.05_peak_2293
1	141075579	141075862	2_wt.q.05_peak_2294
1	141429562	141430432	2_wt.q.05_peak_2295
1	141533077	141533562	2_wt.q.05_peak_2296
1	141782952	141783847	2_wt.q.05_peak_2298
1	141813034	141814363	2_wt.q.05_peak_2299
1	141842118	141843672	2_wt.q.05_peak_2300
1	141857097	141857768	2_wt.q.05_peak_2301
1	141864133	141865319	2_wt.q.05_peak_2302
1	141911642	141912098	2_wt.q.05_peak_2303
1	141966638	141967413	2_wt.q.05_peak_2304
1	141968010	141968844	2_wt.q.05_peak_2305
1	141973971	141975240	2_wt.q.05_peak_2306
1	141993261	141993922	2_wt.q.05_peak_2307
1	141999646	142000303	2_wt.q.05_peak_2308
1	142028832	142029326	2_wt.q.05_peak_2309
1	142054648	142056454	2_wt.q.05_peak_2310
1	142267625	142268110	2_wt.q.05_peak_2311
1	142415194	142415791	2_wt.q.05_peak_2312
1	142440951	142442741	2_wt.q.05_peak_2313
1	142575781	142576458	2_wt.q.05_peak_2314
1	142653135	142653882	2_wt.q.05_peak_2315
1	142655171	142655858	2_wt.q.05_peak_2316
1	142972077	142972383	2_wt.q.05_peak_2317
1	142982409	142983646	2_wt.q.05_peak_2318
1	143129957	143130889	2_wt.q.05_peak_2319
1	143200158	143200814	2_wt.q.05_peak_2320
1	143210243	143210882	2_wt.q.05_peak_2321
1	143318332	143318617	2_wt.q.05_peak_2322
1	143503381	143504166	2_wt.q.05_peak_2323
1	143524174	143524760	2_wt.q.05_peak_2324
1	143639012	143646911	2_wt.q.05_peak_2326
1	143701668	143703477	2_wt.q.05_peak_2330
1	143738941	143740433	2_wt.q.05_peak_2331
1	143773725	143774721	2_wt.q.05_peak_2332
1	143775380	143775785	2_wt.q.05_peak_2333
1	143776152	143777653	2_wt.q.05_peak_2334
1	143830601	143831450	2_wt.q.05_peak_2337
1	143903786	143904452	2_wt.q.05_peak_2338
1	143906393	143907024	2_wt.q.05_peak_2339
1	143911338	143911859	2_wt.q.05_peak_2340
1	143939563	143940082	2_wt.q.05_peak_2341
1	144002360	144005245	2_wt.q.05_peak_2342
1	144118901	144119810	2_wt.q.05_peak_2343
1	144127680	144128147	2_wt.q.05_peak_2344
1	144166996	144167327	2_wt.q.05_peak_2345
1	144176820	144177859	2_wt.q.05_peak_2347
1	144367530	144367998	2_wt.q.05_peak_2348
1	144488356	144489025	2_wt.q.05_peak_2349
1	144667309	144667809	2_wt.q.05_peak_2351
1	144681854	144682900	2_wt.q.05_peak_2352
1	144717788	144718193	2_wt.q.05_peak_2353
1	144745594	144746443	2_wt.q.05_peak_2354
1	144765970	144766536	2_wt.q.05_peak_2355
1	144883326	144883751	2_wt.q.05_peak_2356
1	144916873	144917173	2_wt.q.05_peak_2358
1	144931559	144931905	2_wt.q.05_peak_2359
1	145015331	145016190	2_wt.q.05_peak_2360
1	145017676	145018842	2_wt.q.05_peak_2361
1	145226554	145228451	2_wt.q.05_peak_2362
1	145332409	145333318	2_wt.q.05_peak_2363
1	145361867	145362941	2_wt.q.05_peak_2365
1	145846932	145847541	2_wt.q.05_peak_2366
1	146231429	146232851	2_wt.q.05_peak_2367
1	146299072	146299664	2_wt.q.05_peak_2368
1	146493318	146496061	2_wt.q.05_peak_2369
1	146497291	146497885	2_wt.q.05_peak_2371
1	146498405	146499554	2_wt.q.05_peak_2372
1	146499857	146501611	2_wt.q.05_peak_2373
1	146719414	146719996	2_wt.q.05_peak_2376
1	146720956	146721241	2_wt.q.05_peak_2377
1	146792715	146793426	2_wt.q.05_peak_2378
1	147412057	147412514	2_wt.q.05_peak_2379
1	147658197	147658847	2_wt.q.05_peak_2380
1	147848908	147849221	2_wt.q.05_peak_2382
1	148656820	148657573	2_wt.q.05_peak_2383
1	148852767	148853467	2_wt.q.05_peak_2385
1	148993569	148994000	2_wt.q.05_peak_2386
1	149190200	149190635	2_wt.q.05_peak_2387
1	149272305	149273059	2_wt.q.05_peak_2388
1	149326647	149327163	2_wt.q.05_peak_2389
1	149337988	149339155	2_wt.q.05_peak_2390
1	149351194	149351621	2_wt.q.05_peak_2391
1	149447718	149449239	2_wt.q.05_peak_2393
1	149738617	149740505	2_wt.q.05_peak_2395
1	149774998	149775977	2_wt.q.05_peak_2396
1	149856525	149857303	2_wt.q.05_peak_2397
1	149860897	149863042	2_wt.q.05_peak_2398
1	149865751	149867346	2_wt.q.05_peak_2399
1	149867667	149868505	2_wt.q.05_peak_2400
1	149871173	149872390	2_wt.q.05_peak_2401
1	149876007	149877175	2_wt.q.05_peak_2402
1	149882680	149883041	2_wt.q.05_peak_2403
1	149893713	149894393	2_wt.q.05_peak_2404
1	150098033	150100920	2_wt.q.05_peak_2406
1	150118225	150118897	2_wt.q.05_peak_2407
1	150313330	150313702	2_wt.q.05_peak_2408
1	150392839	150394092	2_wt.q.05_peak_2409
1	150913643	150914420	2_wt.q.05_peak_2411
1	151079555	151080231	2_wt.q.05_peak_2413
1	151082137	151083482	2_wt.q.05_peak_2414
1	151087479	151088640	2_wt.q.05_peak_2415
1	151095805	151096185	2_wt.q.05_peak_2416
1	151124748	151126366	2_wt.q.05_peak_2418
1	151127772	151128380	2_wt.q.05_peak_2419
1	151171766	151172316	2_wt.q.05_peak_2420
1	151250731	151251535	2_wt.q.05_peak_2421
1	151301594	151302659	2_wt.q.05_peak_2422
1	151345582	151346500	2_wt.q.05_peak_2424
1	151427406	151429939	2_wt.q.05_peak_2425
1	151498128	151498436	2_wt.q.05_peak_2427
1	151499207	151501669	2_wt.q.05_peak_2428
1	151754511	151755954	2_wt.q.05_peak_2430
1	151777774	151778076	2_wt.q.05_peak_2432
1	151815106	151815433	2_wt.q.05_peak_2433
1	151890140	151890456	2_wt.q.05_peak_2434
1	152088521	152091272	2_wt.q.05_peak_2438
1	152363995	152364752	2_wt.q.05_peak_2440
1	152368996	152369312	2_wt.q.05_peak_2441
1	152386253	152386969	2_wt.q.05_peak_2442
1	152394085	152394651	2_wt.q.05_peak_2443
1	152399599	152400052	2_wt.q.05_peak_2444
1	152400626	152401685	2_wt.q.05_peak_2445
1	152524042	152525059	2_wt.q.05_peak_2447
1	152525346	152525901	2_wt.q.05_peak_2448
1	152750208	152750867	2_wt.q.05_peak_2453
1	152763858	152768664	2_wt.q.05_peak_2454
1	152819483	152820056	2_wt.q.05_peak_2457
1	152821982	152822449	2_wt.q.05_peak_2458
1	152838555	152839797	2_wt.q.05_peak_2460
1	152866510	152867048	2_wt.q.05_peak_2461
1	152902829	152905156	2_wt.q.05_peak_2462
1	152954674	152955598	2_wt.q.05_peak_2463
1	152982823	152983874	2_wt.q.05_peak_2465
1	152990124	152990713	2_wt.q.05_peak_2466
1	153066049	153067277	2_wt.q.05_peak_2468
1	153179962	153181468	2_wt.q.05_peak_2470
1	153201510	153202223	2_wt.q.05_peak_2471
1	153308091	153309332	2_wt.q.05_peak_2473
1	153310124	153310712	2_wt.q.05_peak_2474
1	153330534	153333788	2_wt.q.05_peak_2475
1	153617159	153617609	2_wt.q.05_peak_2479
1	153641715	153642650	2_wt.q.05_peak_2481
1	153711688	153712062	2_wt.q.05_peak_2485
1	153737328	153738024	2_wt.q.05_peak_2486
1	153899339	153900520	2_wt.q.05_peak_2488
1	153940443	153941445	2_wt.q.05_peak_2491
1	154149965	154150896	2_wt.q.05_peak_2493
1	154223904	154224348	2_wt.q.05_peak_2495
1	154252210	154253514	2_wt.q.05_peak_2496
1	154255766	154256893	2_wt.q.05_peak_2497
1	154258097	154259560	2_wt.q.05_peak_2498
1	154285997	154286293	2_wt.q.05_peak_2499
1	154428187	154428630	2_wt.q.05_peak_2501
1	154476126	154476909	2_wt.q.05_peak_2503
1	154532740	154533612	2_wt.q.05_peak_2506
1	154576367	154577414	2_wt.q.05_peak_2508
1	154582618	154583035	2_wt.q.05_peak_2509
1	154635499	154636513	2_wt.q.05_peak_2510
1	154661050	154662219	2_wt.q.05_peak_2511
1	154688725	154689557	2_wt.q.05_peak_2512
1	154712720	154713620	2_wt.q.05_peak_2514
1	154722261	154723744	2_wt.q.05_peak_2515
1	154724272	154726013	2_wt.q.05_peak_2516
1	154726307	154726743	2_wt.q.05_peak_2517
1	154729840	154730326	2_wt.q.05_peak_2518
1	154730602	154731023	2_wt.q.05_peak_2519
1	154747821	154748404	2_wt.q.05_peak_2521
1	154774666	154775135	2_wt.q.05_peak_2522
1	154788314	154789200	2_wt.q.05_peak_2523
1	154791359	154792555	2_wt.q.05_peak_2524
1	154816245	154817015	2_wt.q.05_peak_2526
1	155015958	155016389	2_wt.q.05_peak_2527
1	155027309	155027857	2_wt.q.05_peak_2528
1	155038355	155039547	2_wt.q.05_peak_2529
1	155040436	155041247	2_wt.q.05_peak_2530
1	155050523	155052488	2_wt.q.05_peak_2531
1	155091087	155092278	2_wt.q.05_peak_2534
1	155096639	155098569	2_wt.q.05_peak_2536
1	155158751	155160083	2_wt.q.05_peak_2537
1	155202286	155202969	2_wt.q.05_peak_2539
1	155205683	155205984	2_wt.q.05_peak_2540
1	155236934	155237783	2_wt.q.05_peak_2544
1	155279916	155281976	2_wt.q.05_peak_2545
1	155297445	155298160	2_wt.q.05_peak_2547
1	155306883	155307481	2_wt.q.05_peak_2549
1	155386957	155387360	2_wt.q.05_peak_2551
1	155392681	155393578	2_wt.q.05_peak_2552
1	155971660	155972398	2_wt.q.05_peak_2559
1	155973431	155974136	2_wt.q.05_peak_2560
1	156035339	156036054	2_wt.q.05_peak_2561
1	156036415	156038388	2_wt.q.05_peak_2562
1	156040496	156042627	2_wt.q.05_peak_2563
1	156043005	156043634	2_wt.q.05_peak_2564
1	156473069	156474679	2_wt.q.05_peak_2567
1	156593062	156593991	2_wt.q.05_peak_2569
1	156623916	156625060	2_wt.q.05_peak_2572
1	156630100	156631543	2_wt.q.05_peak_2573
1	156765164	156765734	2_wt.q.05_peak_2576
1	156857091	156857656	2_wt.q.05_peak_2578
1	156864293	156864858	2_wt.q.05_peak_2579
1	156920285	156921553	2_wt.q.05_peak_2581
1	156937916	156938924	2_wt.q.05_peak_2582
1	157168548	157170579	2_wt.q.05_peak_2589
1	157178932	157179994	2_wt.q.05_peak_2592
1	157182642	157183350	2_wt.q.05_peak_2593
1	157186516	157187058	2_wt.q.05_peak_2594
1	157218836	157219276	2_wt.q.05_peak_2598
1	157220053	157221004	2_wt.q.05_peak_2599
1	157222096	157222490	2_wt.q.05_peak_2600
1	157230171	157233045	2_wt.q.05_peak_2602
1	157233743	157234015	2_wt.q.05_peak_2603
1	157248028	157249000	2_wt.q.05_peak_2605
1	157256214	157256554	2_wt.q.05_peak_2606
1	157256820	157257178	2_wt.q.05_peak_2607
1	157267525	157268118	2_wt.q.05_peak_2608
1	157328598	157329345	2_wt.q.05_peak_2610
1	157407731	157411727	2_wt.q.05_peak_2612
1	157417300	157417963	2_wt.q.05_peak_2613
1	157442958	157445251	2_wt.q.05_peak_2616
1	157468125	157468860	2_wt.q.05_peak_2617
1	157470438	157471461	2_wt.q.05_peak_2618
1	157475932	157476716	2_wt.q.05_peak_2619
1	157480609	157480978	2_wt.q.05_peak_2620
1	157484526	157484960	2_wt.q.05_peak_2622
1	157512473	157514300	2_wt.q.05_peak_2623
1	157517126	157519494	2_wt.q.05_peak_2624
1	157555316	157556326	2_wt.q.05_peak_2626
1	157654742	157655639	2_wt.q.05_peak_2628
1	157669283	157669994	2_wt.q.05_peak_2629
1	158124693	158125306	2_wt.q.05_peak_2636
1	158191584	158193330	2_wt.q.05_peak_2638
1	158243766	158244233	2_wt.q.05_peak_2639
1	158252575	158253415	2_wt.q.05_peak_2641
1	158256123	158256684	2_wt.q.05_peak_2642
1	158318238	158318825	2_wt.q.05_peak_2644
1	158327550	158328946	2_wt.q.05_peak_2645
1	158353219	158356624	2_wt.q.05_peak_2646
1	158362693	158365337	2_wt.q.05_peak_2648
1	158397257	158397566	2_wt.q.05_peak_2649
1	158405572	158406848	2_wt.q.05_peak_2650
1	158407950	158409010	2_wt.q.05_peak_2651
1	158506988	158508387	2_wt.q.05_peak_2652
1	158511862	158514638	2_wt.q.05_peak_2653
1	158547057	158548410	2_wt.q.05_peak_2656
1	158548713	158549968	2_wt.q.05_peak_2657
1	158552984	158554177	2_wt.q.05_peak_2658
1	158576177	158576612	2_wt.q.05_peak_2659
1	158581738	158582471	2_wt.q.05_peak_2660
1	158733017	158733809	2_wt.q.05_peak_2662
1	158910550	158911785	2_wt.q.05_peak_2663
1	159163223	159163973	2_wt.q.05_peak_2664
1	159198588	159199023	2_wt.q.05_peak_2666
1	159211147	159212331	2_wt.q.05_peak_2667
1	159217523	159217985	2_wt.q.05_peak_2668
1	159231644	159232157	2_wt.q.05_peak_2669
1	159232899	159233775	2_wt.q.05_peak_2670
1	159354908	159355462	2_wt.q.05_peak_2674
1	159386292	159386718	2_wt.q.05_peak_2675
1	159393208	159393970	2_wt.q.05_peak_2676
1	159423707	159424427	2_wt.q.05_peak_2678
1	159499667	159500207	2_wt.q.05_peak_2679
1	159523297	159526701	2_wt.q.05_peak_2680
1	159614949	159615421	2_wt.q.05_peak_2684
1	159664245	159665444	2_wt.q.05_peak_2687
1	159688761	159689334	2_wt.q.05_peak_2689
1	159716572	159718207	2_wt.q.05_peak_2690
1	159723643	159724373	2_wt.q.05_peak_2691
1	159739341	159740230	2_wt.q.05_peak_2693
1	159788029	159788354	2_wt.q.05_peak_2696
1	159822195	159822794	2_wt.q.05_peak_2698
1	159872322	159873566	2_wt.q.05_peak_2699
1	159888591	159891640	2_wt.q.05_peak_2700
1	160037032	160037517	2_wt.q.05_peak_2701
1	160050713	160051406	2_wt.q.05_peak_2702
1	160194075	160195450	2_wt.q.05_peak_2704
1	160211412	160214039	2_wt.q.05_peak_2705
1	160221886	160222765	2_wt.q.05_peak_2706
1	160250308	160251635	2_wt.q.05_peak_2708
1	160276611	160277040	2_wt.q.05_peak_2709
1	160278387	160279267	2_wt.q.05_peak_2710
1	160286135	160287506	2_wt.q.05_peak_2711
1	160291990	160292803	2_wt.q.05_peak_2713
1	160330266	160331540	2_wt.q.05_peak_2714
1	160345910	160346597	2_wt.q.05_peak_2715
1	160347718	160351683	2_wt.q.05_peak_2716
1	160369174	160369830	2_wt.q.05_peak_2718
1	160464758	160465554	2_wt.q.05_peak_2721
1	160527875	160528434	2_wt.q.05_peak_2722
1	160530142	160530620	2_wt.q.05_peak_2723
1	160548131	160548899	2_wt.q.05_peak_2725
1	160578109	160578731	2_wt.q.05_peak_2726
1	160579454	160580283	2_wt.q.05_peak_2727
1	160587931	160589068	2_wt.q.05_peak_2728
1	160597994	160598471	2_wt.q.05_peak_2729
1	160620424	160621013	2_wt.q.05_peak_2730
1	160628063	160629679	2_wt.q.05_peak_2731
1	160672014	160673215	2_wt.q.05_peak_2732
1	160743542	160744237	2_wt.q.05_peak_2733
1	161033239	161036984	2_wt.q.05_peak_2736
1	161070087	161071160	2_wt.q.05_peak_2738
1	161114117	161114489	2_wt.q.05_peak_2739
1	161130556	161131949	2_wt.q.05_peak_2740
1	161142137	161143416	2_wt.q.05_peak_2741
1	161195782	161196146	2_wt.q.05_peak_2742
1	161249425	161250432	2_wt.q.05_peak_2743
1	161251196	161251707	2_wt.q.05_peak_2744
1	161491507	161492369	2_wt.q.05_peak_2746
1	161496423	161496989	2_wt.q.05_peak_2747
1	161505945	161507120	2_wt.q.05_peak_2748
1	161607089	161607964	2_wt.q.05_peak_2749
1	161663629	161663925	2_wt.q.05_peak_2750
1	161875610	161877613	2_wt.q.05_peak_2751
1	161968887	161969553	2_wt.q.05_peak_2752
1	162083786	162084585	2_wt.q.05_peak_2753
1	162107966	162109134	2_wt.q.05_peak_2755
1	162299678	162300594	2_wt.q.05_peak_2756
1	162355998	162356633	2_wt.q.05_peak_2759
1	162547931	162549928	2_wt.q.05_peak_2762
1	162570065	162570514	2_wt.q.05_peak_2763
1	162571359	162572664	2_wt.q.05_peak_2764
1	162739276	162740813	2_wt.q.05_peak_2765
1	162773389	162773691	2_wt.q.05_peak_2766
1	162933984	162935117	2_wt.q.05_peak_2767
1	163035722	163036099	2_wt.q.05_peak_2768
1	163281632	163282457	2_wt.q.05_peak_2770
1	163403086	163403960	2_wt.q.05_peak_2771
1	163909752	163910753	2_wt.q.05_peak_2773
1	163929330	163930030	2_wt.q.05_peak_2774
1	163957824	163958523	2_wt.q.05_peak_2775
1	163994543	163995277	2_wt.q.05_peak_2777
1	164118110	164118430	2_wt.q.05_peak_2778
1	164248655	164250263	2_wt.q.05_peak_2780
1	164261570	164262185	2_wt.q.05_peak_2782
1	164275410	164276618	2_wt.q.05_peak_2783
1	164306677	164308355	2_wt.q.05_peak_2784
1	164337937	164339004	2_wt.q.05_peak_2786
1	164394898	164396221	2_wt.q.05_peak_2787
1	164452080	164452637	2_wt.q.05_peak_2790
1	164453513	164455064	2_wt.q.05_peak_2791
1	164455504	164457172	2_wt.q.05_peak_2792
1	164458029	164460723	2_wt.q.05_peak_2793
1	164461572	164462546	2_wt.q.05_peak_2794
1	164474768	164475903	2_wt.q.05_peak_2796
1	164577206	164578034	2_wt.q.05_peak_2798
1	164590340	164590778	2_wt.q.05_peak_2799
1	164681586	164682950	2_wt.q.05_peak_2800
1	164683365	164685288	2_wt.q.05_peak_2801
1	164688928	164689917	2_wt.q.05_peak_2802
1	164704734	164705388	2_wt.q.05_peak_2803
1	164722054	164722803	2_wt.q.05_peak_2804
1	164744891	164745811	2_wt.q.05_peak_2806
1	164758232	164759185	2_wt.q.05_peak_2809
1	164770905	164771441	2_wt.q.05_peak_2810
1	164786001	164786998	2_wt.q.05_peak_2812
1	164848478	164849405	2_wt.q.05_peak_2813
1	164898515	164899193	2_wt.q.05_peak_2814
1	164926353	164927746	2_wt.q.05_peak_2816
1	164931047	164931627	2_wt.q.05_peak_2817
1	164998329	164999401	2_wt.q.05_peak_2818
1	165018656	165019750	2_wt.q.05_peak_2819
1	165020580	165021678	2_wt.q.05_peak_2820
1	165071842	165072388	2_wt.q.05_peak_2823
1	165091703	165092272	2_wt.q.05_peak_2826
1	165104389	165104811	2_wt.q.05_peak_2827
1	165114282	165114844	2_wt.q.05_peak_2828
1	165119889	165120410	2_wt.q.05_peak_2829
1	165190580	165192278	2_wt.q.05_peak_2830
1	165231988	165232826	2_wt.q.05_peak_2831
1	165236314	165237524	2_wt.q.05_peak_2832
1	165303982	165304917	2_wt.q.05_peak_2833
1	165458634	165459193	2_wt.q.05_peak_2835
1	165460641	165461839	2_wt.q.05_peak_2836
1	165558684	165559234	2_wt.q.05_peak_2837
1	165633334	165634733	2_wt.q.05_peak_2838
1	165641348	165643090	2_wt.q.05_peak_2839
1	165763424	165764003	2_wt.q.05_peak_2840
1	166002490	166003689	2_wt.q.05_peak_2843
1	166183254	166183708	2_wt.q.05_peak_2845
1	166243819	166244849	2_wt.q.05_peak_2848
1	166254210	166256302	2_wt.q.05_peak_2849
1	166263493	166264207	2_wt.q.05_peak_2852
1	166279458	166282222	2_wt.q.05_peak_2854
1	166283762	166284988	2_wt.q.05_peak_2855
1	166296829	166300438	2_wt.q.05_peak_2857
1	166304339	166305863	2_wt.q.05_peak_2859
1	166313362	166313815	2_wt.q.05_peak_2861
1	166330189	166331057	2_wt.q.05_peak_2863
1	166378494	166379009	2_wt.q.05_peak_2864
1	166379541	166380104	2_wt.q.05_peak_2865
1	166409349	166410150	2_wt.q.05_peak_2866
1	166429296	166430646	2_wt.q.05_peak_2867
1	166643868	166644146	2_wt.q.05_peak_2868
1	166797200	166797753	2_wt.q.05_peak_2870
1	167001622	167003133	2_wt.q.05_peak_2872
1	167239699	167240166	2_wt.q.05_peak_2874
1	167259043	167260602	2_wt.q.05_peak_2875
1	167308492	167309136	2_wt.q.05_peak_2878
1	167391780	167394579	2_wt.q.05_peak_2880
1	167473295	167473667	2_wt.q.05_peak_2881
1	167945607	167946673	2_wt.q.05_peak_2884
1	167947153	167947723	2_wt.q.05_peak_2885
1	167979350	167979979	2_wt.q.05_peak_2886
1	167980570	167981342	2_wt.q.05_peak_2887
1	168008538	168008938	2_wt.q.05_peak_2888
1	168268084	168268803	2_wt.q.05_peak_2899
1	168375283	168375675	2_wt.q.05_peak_2904
1	168376091	168376356	2_wt.q.05_peak_2905
1	168391149	168392701	2_wt.q.05_peak_2907
1	168418413	168419663	2_wt.q.05_peak_2910
1	168424271	168424922	2_wt.q.05_peak_2912
1	168425799	168432747	2_wt.q.05_peak_2913
1	168686739	168687564	2_wt.q.05_peak_2916
1	168729662	168730340	2_wt.q.05_peak_2917
1	168800861	168801961	2_wt.q.05_peak_2918
1	168812780	168813748	2_wt.q.05_peak_2919
1	168950057	168951640	2_wt.q.05_peak_2920
1	168991433	168991966	2_wt.q.05_peak_2921
1	169027182	169027623	2_wt.q.05_peak_2922
1	169155781	169156146	2_wt.q.05_peak_2924
1	169346712	169348112	2_wt.q.05_peak_2925
1	169459304	169459813	2_wt.q.05_peak_2926
1	169479689	169480012	2_wt.q.05_peak_2928
1	169531607	169532215	2_wt.q.05_peak_2929
1	169745753	169749120	2_wt.q.05_peak_2931
1	169756857	169757154	2_wt.q.05_peak_2932
1	169802877	169804511	2_wt.q.05_peak_2935
1	169830806	169832376	2_wt.q.05_peak_2938
1	169840137	169841529	2_wt.q.05_peak_2939
1	169851733	169852407	2_wt.q.05_peak_2941
1	169883163	169883521	2_wt.q.05_peak_2943
1	169895284	169895680	2_wt.q.05_peak_2944
1	169898323	169898805	2_wt.q.05_peak_2945
1	169899115	169899516	2_wt.q.05_peak_2946
1	169900629	169901338	2_wt.q.05_peak_2947
1	169902859	169903855	2_wt.q.05_peak_2948
1	169968902	169969957	2_wt.q.05_peak_2950
1	170081697	170082986	2_wt.q.05_peak_2951
1	170084038	170085620	2_wt.q.05_peak_2952
1	170138488	170139126	2_wt.q.05_peak_2954
1	170173804	170175329	2_wt.q.05_peak_2955
1	170186555	170187805	2_wt.q.05_peak_2956
1	170215641	170215964	2_wt.q.05_peak_2957
1	170218008	170218597	2_wt.q.05_peak_2958
1	170296084	170296622	2_wt.q.05_peak_2962
1	170297830	170298927	2_wt.q.05_peak_2963
1	170336318	170337716	2_wt.q.05_peak_2965
1	170356656	170357447	2_wt.q.05_peak_2966
1	170367178	170367692	2_wt.q.05_peak_2967
1	170372416	170372711	2_wt.q.05_peak_2970
1	170402628	170404094	2_wt.q.05_peak_2971
1	170408305	170409840	2_wt.q.05_peak_2972
1	170410773	170411464	2_wt.q.05_peak_2973
1	170411844	170412768	2_wt.q.05_peak_2974
1	170440062	170441234	2_wt.q.05_peak_2975
1	170506084	170506950	2_wt.q.05_peak_2978
1	170519332	170520691	2_wt.q.05_peak_2979
1	170548290	170550256	2_wt.q.05_peak_2981
1	170554868	170556160	2_wt.q.05_peak_2982
1	170570620	170571527	2_wt.q.05_peak_2984
1	170580459	170581118	2_wt.q.05_peak_2985
1	170586320	170588789	2_wt.q.05_peak_2986
1	170589884	170590381	2_wt.q.05_peak_2987
1	170732072	170733139	2_wt.q.05_peak_2989
1	170770184	170770908	2_wt.q.05_peak_2992
1	170807026	170808390	2_wt.q.05_peak_2994
1	170809887	170811120	2_wt.q.05_peak_2995
1	170839402	170840217	2_wt.q.05_peak_2998
1	170849722	170850085	2_wt.q.05_peak_2999
1	170852118	170854170	2_wt.q.05_peak_3000
1	170854542	170857401	2_wt.q.05_peak_3001
1	170857788	170858085	2_wt.q.05_peak_3002
1	170866312	170869159	2_wt.q.05_peak_3003
1	170998117	170998876	2_wt.q.05_peak_3004
1	171033385	171034876	2_wt.q.05_peak_3005
1	171036806	171037279	2_wt.q.05_peak_3006
1	171043840	171045412	2_wt.q.05_peak_3008
1	171111216	171112362	2_wt.q.05_peak_3010
1	171149906	171151252	2_wt.q.05_peak_3011
1	171222170	171222976	2_wt.q.05_peak_3014
1	171246696	171247559	2_wt.q.05_peak_3015
1	171262202	171263044	2_wt.q.05_peak_3016
1	171263313	171264047	2_wt.q.05_peak_3017
1	171266186	171266703	2_wt.q.05_peak_3018
1	171280603	171281876	2_wt.q.05_peak_3020
1	171287536	171288434	2_wt.q.05_peak_3021
1	171294585	171295023	2_wt.q.05_peak_3022
1	171307741	171308472	2_wt.q.05_peak_3023
1	171327932	171329104	2_wt.q.05_peak_3024
1	171411041	171411814	2_wt.q.05_peak_3027
1	171412085	171413012	2_wt.q.05_peak_3028
1	171672718	171673610	2_wt.q.05_peak_3030
1	171715351	171715904	2_wt.q.05_peak_3031
1	171775245	171776057	2_wt.q.05_peak_3033
1	171788257	171789300	2_wt.q.05_peak_3034
1	171791121	171792620	2_wt.q.05_peak_3035
1	171826499	171826982	2_wt.q.05_peak_3036
1	171993134	171993502	2_wt.q.05_peak_3037
1	172057096	172057492	2_wt.q.05_peak_3039
1	172082164	172082740	2_wt.q.05_peak_3040
1	172147155	172148068	2_wt.q.05_peak_3042
1	172148663	172150324	2_wt.q.05_peak_3043
1	172200302	172202048	2_wt.q.05_peak_3044
1	172202502	172203113	2_wt.q.05_peak_3045
1	172204564	172204895	2_wt.q.05_peak_3047
1	172205361	172206371	2_wt.q.05_peak_3048
1	172206878	172207266	2_wt.q.05_peak_3049
1	172281683	172282022	2_wt.q.05_peak_3051
1	172297818	172298320	2_wt.q.05_peak_3053
1	172304212	172304967	2_wt.q.05_peak_3054
1	172310666	172314853	2_wt.q.05_peak_3055
1	172319268	172319778	2_wt.q.05_peak_3056
1	172320085	172320679	2_wt.q.05_peak_3057
1	172324268	172325469	2_wt.q.05_peak_3058
1	172328107	172329292	2_wt.q.05_peak_3061
1	172375901	172377215	2_wt.q.05_peak_3064
1	172481736	172482219	2_wt.q.05_peak_3065
1	172840461	172841259	2_wt.q.05_peak_3066
1	173355033	173355921	2_wt.q.05_peak_3069
1	173357064	173358409	2_wt.q.05_peak_3070
1	173366209	173367262	2_wt.q.05_peak_3072
1	173389050	173390203	2_wt.q.05_peak_3074
1	173450841	173451248	2_wt.q.05_peak_3075
1	174501537	174503144	2_wt.q.05_peak_3076
1	174504143	174506538	2_wt.q.05_peak_3077
1	174513000	174514075	2_wt.q.05_peak_3078
1	174517857	174518526	2_wt.q.05_peak_3079
1	174557434	174558995	2_wt.q.05_peak_3080
1	174763295	174763639	2_wt.q.05_peak_3084
1	174811655	174812459	2_wt.q.05_peak_3085
1	174921546	174922058	2_wt.q.05_peak_3087
1	175108274	175109832	2_wt.q.05_peak_3088
1	175142885	175143950	2_wt.q.05_peak_3090
1	175185461	175185834	2_wt.q.05_peak_3092
1	175187982	175188652	2_wt.q.05_peak_3093
1	175212050	175212737	2_wt.q.05_peak_3094
1	175214558	175215233	2_wt.q.05_peak_3095
1	175254640	175255293	2_wt.q.05_peak_3096
1	175296697	175297059	2_wt.q.05_peak_3098
1	175300355	175300954	2_wt.q.05_peak_3099
1	175323107	175323404	2_wt.q.05_peak_3100
1	175391868	175392365	2_wt.q.05_peak_3101
1	175441554	175442765	2_wt.q.05_peak_3104
1	175489076	175490614	2_wt.q.05_peak_3107
1	175491122	175491754	2_wt.q.05_peak_3108
1	175625004	175626171	2_wt.q.05_peak_3110
1	175691566	175693679	2_wt.q.05_peak_3111
1	175870111	175870920	2_wt.q.05_peak_3112
[truncated: 26,798 more rows]

## Sheet: H3K4me1_CR_E14_CTX_Peaks
1	3093837	3095897	h3k4me1.q.05_peak_1
1	3119397	3119815	h3k4me1.q.05_peak_2
1	3120474	3121745	h3k4me1.q.05_peak_3
1	3395643	3396236	h3k4me1.q.05_peak_4
1	3398058	3401330	h3k4me1.q.05_peak_5
1	3415700	3416905	h3k4me1.q.05_peak_6
1	3427839	3428399	h3k4me1.q.05_peak_7
1	3447187	3447538	h3k4me1.q.05_peak_8
1	3466279	3466848	h3k4me1.q.05_peak_9
1	3477023	3478107	h3k4me1.q.05_peak_10
1	3482709	3483199	h3k4me1.q.05_peak_11
1	3514685	3515409	h3k4me1.q.05_peak_12
1	3648210	3649912	h3k4me1.q.05_peak_13
1	3669578	3670783	h3k4me1.q.05_peak_14
1	3672073	3672690	h3k4me1.q.05_peak_15
1	3702900	3703655	h3k4me1.q.05_peak_16
1	3725790	3726618	h3k4me1.q.05_peak_17
1	3841668	3842743	h3k4me1.q.05_peak_18
1	3913583	3914744	h3k4me1.q.05_peak_19
1	3926026	3926883	h3k4me1.q.05_peak_20
1	3970618	3971086	h3k4me1.q.05_peak_21
1	4326409	4327228	h3k4me1.q.05_peak_22
1	4491482	4493920	h3k4me1.q.05_peak_23
1	4496094	4497912	h3k4me1.q.05_peak_24
1	4519415	4519973	h3k4me1.q.05_peak_25
1	4571090	4572463	h3k4me1.q.05_peak_26
1	4611779	4612031	h3k4me1.q.05_peak_27
1	4671450	4671996	h3k4me1.q.05_peak_28
1	4766554	4767188	h3k4me1.q.05_peak_29
1	4767916	4768157	h3k4me1.q.05_peak_30
1	4783783	4785136	h3k4me1.q.05_peak_31
1	4786195	4786670	h3k4me1.q.05_peak_32
1	4808271	4810157	h3k4me1.q.05_peak_33
1	4819837	4821356	h3k4me1.q.05_peak_34
1	4829587	4829869	h3k4me1.q.05_peak_35
1	4857259	4857660	h3k4me1.q.05_peak_36
1	4858400	4860757	h3k4me1.q.05_peak_37
1	4915152	4915523	h3k4me1.q.05_peak_38
1	4968632	4972594	h3k4me1.q.05_peak_39
1	5014811	5025689	h3k4me1.q.05_peak_40
1	5033064	5034101	h3k4me1.q.05_peak_41
1	5054684	5056939	h3k4me1.q.05_peak_42
1	5083897	5084764	h3k4me1.q.05_peak_43
1	5232230	5233361	h3k4me1.q.05_peak_44
1	5588098	5589050	h3k4me1.q.05_peak_45
1	5916119	5918070	h3k4me1.q.05_peak_46
1	6097155	6097718	h3k4me1.q.05_peak_47
1	6212485	6214181	h3k4me1.q.05_peak_48
1	6215179	6217127	h3k4me1.q.05_peak_49
1	6217627	6217941	h3k4me1.q.05_peak_50
1	6257785	6258258	h3k4me1.q.05_peak_51
1	6282240	6282772	h3k4me1.q.05_peak_52
1	6358820	6359706	h3k4me1.q.05_peak_53
1	6382462	6383460	h3k4me1.q.05_peak_54
1	6441514	6441853	h3k4me1.q.05_peak_55
1	6448021	6448738	h3k4me1.q.05_peak_56
1	6483018	6484388	h3k4me1.q.05_peak_57
1	6510049	6511122	h3k4me1.q.05_peak_58
1	6526349	6526973	h3k4me1.q.05_peak_59
1	6592585	6593433	h3k4me1.q.05_peak_60
1	6716634	6718698	h3k4me1.q.05_peak_61
1	6727393	6727593	h3k4me1.q.05_peak_62
1	6727854	6736945	h3k4me1.q.05_peak_63
1	6737432	6740076	h3k4me1.q.05_peak_64
1	6750484	6753687	h3k4me1.q.05_peak_65
1	6756548	6758417	h3k4me1.q.05_peak_66
1	6759390	6762113	h3k4me1.q.05_peak_67
1	6767283	6767768	h3k4me1.q.05_peak_68
1	6789980	6790560	h3k4me1.q.05_peak_69
1	6799382	6801292	h3k4me1.q.05_peak_70
1	6805010	6805721	h3k4me1.q.05_peak_71
1	6820913	6821302	h3k4me1.q.05_peak_72
1	6824253	6826406	h3k4me1.q.05_peak_73
1	6866227	6867517	h3k4me1.q.05_peak_74
1	7087784	7088564	h3k4me1.q.05_peak_75
1	7089483	7092130	h3k4me1.q.05_peak_76
1	7094843	7096414	h3k4me1.q.05_peak_77
1	7104118	7105945	h3k4me1.q.05_peak_78
1	7136985	7140014	h3k4me1.q.05_peak_79
1	7148336	7148889	h3k4me1.q.05_peak_80
1	7167823	7168410	h3k4me1.q.05_peak_81
1	7206155	7207380	h3k4me1.q.05_peak_82
1	7313081	7314253	h3k4me1.q.05_peak_83
1	7318952	7319610	h3k4me1.q.05_peak_84
1	7492570	7493041	h3k4me1.q.05_peak_85
1	7493251	7493691	h3k4me1.q.05_peak_86
1	7777091	7777634	h3k4me1.q.05_peak_87
1	7854093	7854969	h3k4me1.q.05_peak_88
1	8262495	8262722	h3k4me1.q.05_peak_89
1	8494718	8495140	h3k4me1.q.05_peak_90
1	8495366	8496899	h3k4me1.q.05_peak_91
1	8557802	8558389	h3k4me1.q.05_peak_92
1	8581468	8583500	h3k4me1.q.05_peak_93
1	8625818	8627034	h3k4me1.q.05_peak_94
1	8912505	8912974	h3k4me1.q.05_peak_95
1	8913393	8913877	h3k4me1.q.05_peak_96
1	8914774	8916386	h3k4me1.q.05_peak_97
1	8937817	8939389	h3k4me1.q.05_peak_98
1	8947399	8949054	h3k4me1.q.05_peak_99
1	9248479	9249970	h3k4me1.q.05_peak_100
1	9287570	9290734	h3k4me1.q.05_peak_101
1	9296377	9297512	h3k4me1.q.05_peak_102
1	9298108	9301492	h3k4me1.q.05_peak_103
1	9544637	9545192	h3k4me1.q.05_peak_104
1	9546583	9549174	h3k4me1.q.05_peak_105
1	9563568	9566160	h3k4me1.q.05_peak_106
1	9578068	9578973	h3k4me1.q.05_peak_107
1	9582517	9585061	h3k4me1.q.05_peak_108
1	9600786	9603282	h3k4me1.q.05_peak_109
1	9619026	9620828	h3k4me1.q.05_peak_110
1	9621352	9623900	h3k4me1.q.05_peak_111
1	9626254	9631869	h3k4me1.q.05_peak_112
1	9633162	9633894	h3k4me1.q.05_peak_113
1	9638624	9638919	h3k4me1.q.05_peak_114
1	9648384	9650227	h3k4me1.q.05_peak_115
1	9652168	9653014	h3k4me1.q.05_peak_116
1	9656518	9657062	h3k4me1.q.05_peak_117
1	9658624	9659520	h3k4me1.q.05_peak_118
1	9661068	9661578	h3k4me1.q.05_peak_119
1	9696801	9700070	h3k4me1.q.05_peak_120
1	9701003	9701684	h3k4me1.q.05_peak_121
1	9731412	9731785	h3k4me1.q.05_peak_122
1	9741529	9747621	h3k4me1.q.05_peak_123
1	9748515	9748933	h3k4me1.q.05_peak_124
1	9773244	9773715	h3k4me1.q.05_peak_125
1	9773994	9774576	h3k4me1.q.05_peak_126
1	9776908	9777112	h3k4me1.q.05_peak_127
1	9797046	9797748	h3k4me1.q.05_peak_128
1	9798709	9800025	h3k4me1.q.05_peak_129
1	9805243	9806070	h3k4me1.q.05_peak_130
1	9847825	9850441	h3k4me1.q.05_peak_131
1	9940176	9943172	h3k4me1.q.05_peak_132
1	9944330	9944566	h3k4me1.q.05_peak_133
1	9953039	9954115	h3k4me1.q.05_peak_134
1	9967608	9968572	h3k4me1.q.05_peak_135
1	10008581	10009572	h3k4me1.q.05_peak_136
1	10013749	10015434	h3k4me1.q.05_peak_137
1	10035927	10037393	h3k4me1.q.05_peak_138
1	10038024	10038457	h3k4me1.q.05_peak_139
1	10038926	10039557	h3k4me1.q.05_peak_140
1	10040213	10042109	h3k4me1.q.05_peak_141
1	10043632	10043899	h3k4me1.q.05_peak_142
1	10094706	10095500	h3k4me1.q.05_peak_143
1	10228750	10229262	h3k4me1.q.05_peak_144
1	10229468	10232221	h3k4me1.q.05_peak_145
1	10233531	10233737	h3k4me1.q.05_peak_146
1	10285367	10285607	h3k4me1.q.05_peak_147
1	10299824	10301163	h3k4me1.q.05_peak_148
1	10327876	10328591	h3k4me1.q.05_peak_149
1	10476584	10478041	h3k4me1.q.05_peak_150
1	10524338	10526063	h3k4me1.q.05_peak_151
1	10590903	10591880	h3k4me1.q.05_peak_152
1	10595263	10597287	h3k4me1.q.05_peak_153
1	10681612	10682478	h3k4me1.q.05_peak_154
1	10700097	10700369	h3k4me1.q.05_peak_155
1	10717207	10717619	h3k4me1.q.05_peak_156
1	10717921	10720951	h3k4me1.q.05_peak_157
1	10793872	10794938	h3k4me1.q.05_peak_158
1	10871447	10872380	h3k4me1.q.05_peak_159
1	10918796	10920447	h3k4me1.q.05_peak_160
1	10937817	10938820	h3k4me1.q.05_peak_161
1	10943002	10943335	h3k4me1.q.05_peak_162
1	10949391	10949588	h3k4me1.q.05_peak_163
1	10953038	10953642	h3k4me1.q.05_peak_164
1	10990493	10994666	h3k4me1.q.05_peak_165
1	11022620	11023272	h3k4me1.q.05_peak_166
1	11024147	11025409	h3k4me1.q.05_peak_167
1	11026752	11028106	h3k4me1.q.05_peak_168
1	11033268	11034323	h3k4me1.q.05_peak_169
1	11044183	11047448	h3k4me1.q.05_peak_170
1	11089514	11091074	h3k4me1.q.05_peak_171
1	11138129	11138541	h3k4me1.q.05_peak_172
1	11277468	11278138	h3k4me1.q.05_peak_173
1	11329266	11330920	h3k4me1.q.05_peak_174
1	11404418	11407534	h3k4me1.q.05_peak_175
1	11413232	11414767	h3k4me1.q.05_peak_176
1	11458363	11458724	h3k4me1.q.05_peak_177
1	11567073	11567461	h3k4me1.q.05_peak_178
1	11580580	11581084	h3k4me1.q.05_peak_179
1	11652901	11653559	h3k4me1.q.05_peak_180
1	11748264	11749769	h3k4me1.q.05_peak_181
1	11751740	11751969	h3k4me1.q.05_peak_182
1	11788306	11788577	h3k4me1.q.05_peak_183
1	11795483	11795900	h3k4me1.q.05_peak_184
1	11895493	11896193	h3k4me1.q.05_peak_185
1	11931672	11932719	h3k4me1.q.05_peak_186
1	11982600	11983312	h3k4me1.q.05_peak_187
1	11999560	12001635	h3k4me1.q.05_peak_188
1	12025171	12027088	h3k4me1.q.05_peak_189
1	12054828	12057252	h3k4me1.q.05_peak_190
1	12063354	12064020	h3k4me1.q.05_peak_191
1	12091790	12094278	h3k4me1.q.05_peak_192
1	12115138	12115789	h3k4me1.q.05_peak_193
1	12367076	12367499	h3k4me1.q.05_peak_194
1	12397804	12399227	h3k4me1.q.05_peak_195
1	12409803	12411424	h3k4me1.q.05_peak_196
1	12414104	12414327	h3k4me1.q.05_peak_197
1	12436292	12436627	h3k4me1.q.05_peak_198
1	12554732	12554947	h3k4me1.q.05_peak_199
1	12555195	12556770	h3k4me1.q.05_peak_200
1	12572020	12572238	h3k4me1.q.05_peak_201
1	12576799	12578158	h3k4me1.q.05_peak_202
1	12588610	12588881	h3k4me1.q.05_peak_203
1	12621368	12622485	h3k4me1.q.05_peak_204
1	12640762	12641829	h3k4me1.q.05_peak_205
1	12671132	12671421	h3k4me1.q.05_peak_206
1	12671829	12672362	h3k4me1.q.05_peak_207
1	12689091	12694866	h3k4me1.q.05_peak_208
1	12697436	12698395	h3k4me1.q.05_peak_209
1	12703786	12705227	h3k4me1.q.05_peak_210
1	12710177	12711850	h3k4me1.q.05_peak_211
1	12713226	12713803	h3k4me1.q.05_peak_212
1	12717853	12719306	h3k4me1.q.05_peak_213
1	12733844	12735138	h3k4me1.q.05_peak_214
1	12735888	12736086	h3k4me1.q.05_peak_215
1	12736289	12737061	h3k4me1.q.05_peak_216
1	12744574	12745412	h3k4me1.q.05_peak_217
1	12771335	12772063	h3k4me1.q.05_peak_218
1	12775723	12776690	h3k4me1.q.05_peak_219
1	12781277	12782328	h3k4me1.q.05_peak_220
1	12784423	12786205	h3k4me1.q.05_peak_221
1	12795100	12796588	h3k4me1.q.05_peak_222
1	12805681	12808500	h3k4me1.q.05_peak_223
1	12810990	12812188	h3k4me1.q.05_peak_224
1	12814149	12815288	h3k4me1.q.05_peak_225
1	12826006	12826512	h3k4me1.q.05_peak_226
1	12832269	12836964	h3k4me1.q.05_peak_227
1	12851794	12852376	h3k4me1.q.05_peak_228
1	12871789	12872592	h3k4me1.q.05_peak_229
1	12875327	12876094	h3k4me1.q.05_peak_230
1	12947188	12947954	h3k4me1.q.05_peak_231
1	12984466	12986605	h3k4me1.q.05_peak_232
1	12986841	12989822	h3k4me1.q.05_peak_233
1	12990484	12991357	h3k4me1.q.05_peak_234
1	12992789	12993265	h3k4me1.q.05_peak_235
1	13004524	13006104	h3k4me1.q.05_peak_236
1	13018063	13019334	h3k4me1.q.05_peak_237
1	13069650	13070075	h3k4me1.q.05_peak_238
1	13103462	13104640	h3k4me1.q.05_peak_239
1	13111416	13112017	h3k4me1.q.05_peak_240
1	13124827	13127460	h3k4me1.q.05_peak_241
1	13127959	13128973	h3k4me1.q.05_peak_242
1	13132034	13132469	h3k4me1.q.05_peak_243
1	13170956	13171848	h3k4me1.q.05_peak_244
1	13183147	13185741	h3k4me1.q.05_peak_245
1	13188256	13189558	h3k4me1.q.05_peak_246
1	13195434	13197752	h3k4me1.q.05_peak_247
1	13245057	13246337	h3k4me1.q.05_peak_248
1	13251582	13251809	h3k4me1.q.05_peak_249
1	13273534	13273847	h3k4me1.q.05_peak_250
1	13289757	13292942	h3k4me1.q.05_peak_251
1	13293145	13293873	h3k4me1.q.05_peak_252
1	13299074	13300479	h3k4me1.q.05_peak_253
1	13312369	13315414	h3k4me1.q.05_peak_254
1	13326674	13327393	h3k4me1.q.05_peak_255
1	13329395	13334371	h3k4me1.q.05_peak_256
1	13340754	13340984	h3k4me1.q.05_peak_257
1	13352707	13353722	h3k4me1.q.05_peak_258
1	13365670	13365888	h3k4me1.q.05_peak_259
1	13367175	13367783	h3k4me1.q.05_peak_260
1	13369902	13372499	h3k4me1.q.05_peak_261
1	13374414	13375439	h3k4me1.q.05_peak_262
1	13425197	13427928	h3k4me1.q.05_peak_263
1	13437783	13438264	h3k4me1.q.05_peak_264
1	13467304	13468807	h3k4me1.q.05_peak_265
1	13487962	13490521	h3k4me1.q.05_peak_266
1	13494007	13495408	h3k4me1.q.05_peak_267
1	13574181	13574796	h3k4me1.q.05_peak_268
1	13586704	13589049	h3k4me1.q.05_peak_269
1	13608024	13608414	h3k4me1.q.05_peak_270
1	13614602	13614963	h3k4me1.q.05_peak_271
1	13649271	13650075	h3k4me1.q.05_peak_272
1	13658067	13660609	h3k4me1.q.05_peak_273
1	13682772	13684747	h3k4me1.q.05_peak_274
1	13788583	13788917	h3k4me1.q.05_peak_275
1	13789176	13790071	h3k4me1.q.05_peak_276
1	13835746	13836409	h3k4me1.q.05_peak_277
1	13857762	13858096	h3k4me1.q.05_peak_278
1	13858307	13862242	h3k4me1.q.05_peak_279
1	13862505	13863511	h3k4me1.q.05_peak_280
1	13863860	13864721	h3k4me1.q.05_peak_281
1	13870581	13871414	h3k4me1.q.05_peak_282
1	13933755	13939659	h3k4me1.q.05_peak_283
1	13992443	13994099	h3k4me1.q.05_peak_284
1	14000074	14003407	h3k4me1.q.05_peak_285
1	14008977	14012337	h3k4me1.q.05_peak_286
1	14096476	14100125	h3k4me1.q.05_peak_287
1	14108074	14110306	h3k4me1.q.05_peak_288
1	14129057	14130342	h3k4me1.q.05_peak_289
1	14135416	14135676	h3k4me1.q.05_peak_290
1	14139223	14141169	h3k4me1.q.05_peak_291
1	14162344	14163433	h3k4me1.q.05_peak_292
1	14165270	14165939	h3k4me1.q.05_peak_293
1	14179606	14182936	h3k4me1.q.05_peak_294
1	14183280	14187270	h3k4me1.q.05_peak_295
1	14188640	14190690	h3k4me1.q.05_peak_296
1	14190934	14191657	h3k4me1.q.05_peak_297
1	14191913	14194947	h3k4me1.q.05_peak_298
1	14198860	14199978	h3k4me1.q.05_peak_299
1	14202143	14202726	h3k4me1.q.05_peak_300
1	14218889	14219272	h3k4me1.q.05_peak_301
1	14219711	14221511	h3k4me1.q.05_peak_302
1	14225117	14226345	h3k4me1.q.05_peak_303
1	14255138	14255950	h3k4me1.q.05_peak_304
1	14268140	14268978	h3k4me1.q.05_peak_305
1	14285026	14286675	h3k4me1.q.05_peak_306
1	14286924	14289100	h3k4me1.q.05_peak_307
1	14290981	14295069	h3k4me1.q.05_peak_308
1	14297506	14298791	h3k4me1.q.05_peak_309
1	14301089	14301657	h3k4me1.q.05_peak_310
1	14301986	14313112	h3k4me1.q.05_peak_311
1	14355797	14357136	h3k4me1.q.05_peak_312
1	14369305	14369797	h3k4me1.q.05_peak_313
1	14370032	14370400	h3k4me1.q.05_peak_314
1	14370659	14371963	h3k4me1.q.05_peak_315
1	14404289	14405601	h3k4me1.q.05_peak_316
1	14428888	14430091	h3k4me1.q.05_peak_317
1	14431576	14432332	h3k4me1.q.05_peak_318
1	14464432	14465186	h3k4me1.q.05_peak_319
1	14471399	14472884	h3k4me1.q.05_peak_320
1	14502981	14510570	h3k4me1.q.05_peak_321
1	14510856	14513484	h3k4me1.q.05_peak_322
1	14565453	14567115	h3k4me1.q.05_peak_323
1	14573348	14575335	h3k4me1.q.05_peak_324
1	14626696	14627264	h3k4me1.q.05_peak_325
1	14668969	14669909	h3k4me1.q.05_peak_326
1	14678738	14679542	h3k4me1.q.05_peak_327
1	14754796	14757948	h3k4me1.q.05_peak_328
1	14841084	14841487	h3k4me1.q.05_peak_329
1	14868478	14870800	h3k4me1.q.05_peak_330
1	14908531	14909719	h3k4me1.q.05_peak_331
1	14918018	14919476	h3k4me1.q.05_peak_332
1	14920302	14921034	h3k4me1.q.05_peak_333
1	15285905	15286521	h3k4me1.q.05_peak_334
1	15287249	15290432	h3k4me1.q.05_peak_335
1	15290687	15291075	h3k4me1.q.05_peak_336
1	15292239	15292456	h3k4me1.q.05_peak_337
1	15332653	15333174	h3k4me1.q.05_peak_338
1	15382700	15385592	h3k4me1.q.05_peak_339
1	15386115	15386660	h3k4me1.q.05_peak_340
1	15426802	15427132	h3k4me1.q.05_peak_341
1	15429779	15430400	h3k4me1.q.05_peak_342
1	15482024	15484160	h3k4me1.q.05_peak_343
1	15506172	15506958	h3k4me1.q.05_peak_344
1	15568234	15569458	h3k4me1.q.05_peak_345
1	15584482	15585603	h3k4me1.q.05_peak_346
1	15600878	15601455	h3k4me1.q.05_peak_347
1	15607510	15608961	h3k4me1.q.05_peak_348
1	15609186	15609856	h3k4me1.q.05_peak_349
1	15610266	15611216	h3k4me1.q.05_peak_350
1	15615622	15617999	h3k4me1.q.05_peak_351
1	15632874	15633341	h3k4me1.q.05_peak_352
1	15636174	15638253	h3k4me1.q.05_peak_353
1	15640754	15641795	h3k4me1.q.05_peak_354
1	15649158	15650733	h3k4me1.q.05_peak_355
1	15650987	15652849	h3k4me1.q.05_peak_356
1	15768287	15768726	h3k4me1.q.05_peak_357
1	15805206	15805499	h3k4me1.q.05_peak_358
1	15806297	15809736	h3k4me1.q.05_peak_359
1	15892302	15893320	h3k4me1.q.05_peak_360
1	15913449	15913646	h3k4me1.q.05_peak_361
1	16058386	16059439	h3k4me1.q.05_peak_362
1	16069908	16070311	h3k4me1.q.05_peak_363
1	16091655	16093706	h3k4me1.q.05_peak_364
1	16100862	16101241	h3k4me1.q.05_peak_365
1	16101471	16101667	h3k4me1.q.05_peak_366
1	16101950	16103502	h3k4me1.q.05_peak_367
1	16106054	16107753	h3k4me1.q.05_peak_368
1	16111657	16113586	h3k4me1.q.05_peak_369
1	16122684	16123684	h3k4me1.q.05_peak_370
1	16127951	16128194	h3k4me1.q.05_peak_371
1	16129810	16134132	h3k4me1.q.05_peak_372
1	16134812	16135448	h3k4me1.q.05_peak_373
1	16179132	16179560	h3k4me1.q.05_peak_374
1	16185809	16186816	h3k4me1.q.05_peak_375
1	16201417	16202959	h3k4me1.q.05_peak_376
1	16204900	16205477	h3k4me1.q.05_peak_377
1	16212510	16213073	h3k4me1.q.05_peak_378
1	16248726	16250111	h3k4me1.q.05_peak_379
1	16256708	16257068	h3k4me1.q.05_peak_380
1	16268451	16269066	h3k4me1.q.05_peak_381
1	16300082	16302951	h3k4me1.q.05_peak_382
1	16361975	16362305	h3k4me1.q.05_peak_383
1	16468679	16468981	h3k4me1.q.05_peak_384
1	16483620	16483957	h3k4me1.q.05_peak_385
1	16517257	16518772	h3k4me1.q.05_peak_386
1	16520109	16520871	h3k4me1.q.05_peak_387
1	16545996	16547344	h3k4me1.q.05_peak_388
1	16606652	16607992	h3k4me1.q.05_peak_389
1	16615580	16618455	h3k4me1.q.05_peak_390
1	16619486	16619846	h3k4me1.q.05_peak_391
1	16654121	16656276	h3k4me1.q.05_peak_392
1	16657230	16658210	h3k4me1.q.05_peak_393
1	16665410	16667698	h3k4me1.q.05_peak_394
1	16668319	16668542	h3k4me1.q.05_peak_395
1	16687454	16689411	h3k4me1.q.05_peak_396
1	16824115	16825449	h3k4me1.q.05_peak_397
1	16979278	16980859	h3k4me1.q.05_peak_398
1	17006039	17006547	h3k4me1.q.05_peak_399
1	17006778	17008891	h3k4me1.q.05_peak_400
1	17009180	17011276	h3k4me1.q.05_peak_401
1	17053304	17055140	h3k4me1.q.05_peak_402
1	17055847	17056048	h3k4me1.q.05_peak_403
1	17058913	17061292	h3k4me1.q.05_peak_404
1	17085835	17086212	h3k4me1.q.05_peak_405
1	17087862	17088243	h3k4me1.q.05_peak_406
1	17089313	17090157	h3k4me1.q.05_peak_407
1	17090442	17090797	h3k4me1.q.05_peak_408
1	17093252	17096845	h3k4me1.q.05_peak_409
1	17098001	17099421	h3k4me1.q.05_peak_410
1	17115915	17117395	h3k4me1.q.05_peak_411
1	17123053	17123589	h3k4me1.q.05_peak_412
1	17126387	17126601	h3k4me1.q.05_peak_413
1	17145388	17147168	h3k4me1.q.05_peak_414
1	17416052	17416249	h3k4me1.q.05_peak_415
1	17426617	17427331	h3k4me1.q.05_peak_416
1	17598881	17600939	h3k4me1.q.05_peak_417
1	17601226	17602272	h3k4me1.q.05_peak_418
1	17657061	17658164	h3k4me1.q.05_peak_419
1	17726633	17728041	h3k4me1.q.05_peak_420
1	17762297	17763370	h3k4me1.q.05_peak_421
1	17767274	17767596	h3k4me1.q.05_peak_422
1	17838468	17838772	h3k4me1.q.05_peak_423
1	18056800	18059210	h3k4me1.q.05_peak_424
1	18105244	18106637	h3k4me1.q.05_peak_425
1	18167501	18169257	h3k4me1.q.05_peak_426
1	18175150	18176691	h3k4me1.q.05_peak_427
1	18179698	18182395	h3k4me1.q.05_peak_428
1	18190074	18193001	h3k4me1.q.05_peak_429
1	18196303	18196734	h3k4me1.q.05_peak_430
1	18268841	18269186	h3k4me1.q.05_peak_431
1	18292180	18293504	h3k4me1.q.05_peak_432
1	18296289	18296907	h3k4me1.q.05_peak_433
1	18306829	18308849	h3k4me1.q.05_peak_434
1	18359687	18359927	h3k4me1.q.05_peak_435
1	18362510	18362809	h3k4me1.q.05_peak_436
1	18415348	18417163	h3k4me1.q.05_peak_437
1	18457370	18466551	h3k4me1.q.05_peak_438
1	18512109	18513234	h3k4me1.q.05_peak_439
1	18598826	18600302	h3k4me1.q.05_peak_440
1	18638922	18641318	h3k4me1.q.05_peak_441
1	18758344	18758897	h3k4me1.q.05_peak_442
1	18849188	18849400	h3k4me1.q.05_peak_443
1	18976466	18977359	h3k4me1.q.05_peak_444
1	19087803	19088497	h3k4me1.q.05_peak_445
1	19096554	19097469	h3k4me1.q.05_peak_446
1	19205776	19206364	h3k4me1.q.05_peak_447
1	19208940	19210821	h3k4me1.q.05_peak_448
1	19216619	19222604	h3k4me1.q.05_peak_449
1	19226733	19226994	h3k4me1.q.05_peak_450
1	19240681	19241797	h3k4me1.q.05_peak_451
1	19244527	19246069	h3k4me1.q.05_peak_452
1	19336856	19337785	h3k4me1.q.05_peak_453
1	19350317	19350880	h3k4me1.q.05_peak_454
1	19421096	19421688	h3k4me1.q.05_peak_455
1	19473642	19474001	h3k4me1.q.05_peak_456
1	19488775	19490588	h3k4me1.q.05_peak_457
1	19582340	19584343	h3k4me1.q.05_peak_458
1	19615717	19616166	h3k4me1.q.05_peak_459
1	19620004	19620991	h3k4me1.q.05_peak_460
1	19673063	19674770	h3k4me1.q.05_peak_461
1	19693765	19694295	h3k4me1.q.05_peak_462
1	19698915	19700568	h3k4me1.q.05_peak_463
1	19735028	19735641	h3k4me1.q.05_peak_464
1	19767388	19768273	h3k4me1.q.05_peak_465
1	19849745	19850576	h3k4me1.q.05_peak_466
1	19856888	19858753	h3k4me1.q.05_peak_467
1	19868147	19868599	h3k4me1.q.05_peak_468
1	19880908	19881799	h3k4me1.q.05_peak_469
1	19899550	19901974	h3k4me1.q.05_peak_470
1	19927490	19928073	h3k4me1.q.05_peak_471
1	19951414	19951821	h3k4me1.q.05_peak_472
1	19981050	19985092	h3k4me1.q.05_peak_473
1	20017863	20018654	h3k4me1.q.05_peak_474
1	20036543	20036967	h3k4me1.q.05_peak_475
1	20039185	20040079	h3k4me1.q.05_peak_476
1	20058180	20058630	h3k4me1.q.05_peak_477
1	20068438	20070579	h3k4me1.q.05_peak_478
1	20139253	20140276	h3k4me1.q.05_peak_479
1	20240412	20241176	h3k4me1.q.05_peak_480
1	20243831	20244334	h3k4me1.q.05_peak_481
1	20245482	20245690	h3k4me1.q.05_peak_482
1	20287523	20289104	h3k4me1.q.05_peak_483
1	20301413	20304081	h3k4me1.q.05_peak_484
1	20344390	20345107	h3k4me1.q.05_peak_485
1	20407570	20410203	h3k4me1.q.05_peak_486
1	20427530	20430080	h3k4me1.q.05_peak_487
1	20430401	20431327	h3k4me1.q.05_peak_488
1	20470591	20471218	h3k4me1.q.05_peak_489
1	20477464	20479003	h3k4me1.q.05_peak_490
1	20499166	20499464	h3k4me1.q.05_peak_491
1	20502168	20503881	h3k4me1.q.05_peak_492
1	20671502	20672762	h3k4me1.q.05_peak_493
1	20677970	20678247	h3k4me1.q.05_peak_494
1	20788440	20788770	h3k4me1.q.05_peak_495
1	20817961	20819701	h3k4me1.q.05_peak_496
1	20820509	20821213	h3k4me1.q.05_peak_497
1	20822818	20826013	h3k4me1.q.05_peak_498
1	20839977	20840420	h3k4me1.q.05_peak_499
1	20844850	20846916	h3k4me1.q.05_peak_500
1	20864636	20865412	h3k4me1.q.05_peak_501
1	20866047	20869291	h3k4me1.q.05_peak_502
1	20870017	20871217	h3k4me1.q.05_peak_503
1	20877298	20877824	h3k4me1.q.05_peak_504
1	20889401	20890474	h3k4me1.q.05_peak_505
1	20890689	20894773	h3k4me1.q.05_peak_506
1	20896382	20896732	h3k4me1.q.05_peak_507
1	20897975	20899926	h3k4me1.q.05_peak_508
1	20900640	20900861	h3k4me1.q.05_peak_509
1	20904338	20904687	h3k4me1.q.05_peak_510
1	20904917	20909750	h3k4me1.q.05_peak_511
1	20909970	20910603	h3k4me1.q.05_peak_512
1	20911468	20913018	h3k4me1.q.05_peak_513
1	20919514	20919773	h3k4me1.q.05_peak_514
1	20920984	20923942	h3k4me1.q.05_peak_515
1	20951002	20951871	h3k4me1.q.05_peak_516
1	20995279	20995836	h3k4me1.q.05_peak_517
1	21002344	21003358	h3k4me1.q.05_peak_518
1	21004663	21005461	h3k4me1.q.05_peak_519
1	21039626	21040172	h3k4me1.q.05_peak_520
1	21051408	21053801	h3k4me1.q.05_peak_521
1	21068146	21068352	h3k4me1.q.05_peak_522
1	21072112	21072724	h3k4me1.q.05_peak_523
1	21073326	21079925	h3k4me1.q.05_peak_524
1	21084674	21085261	h3k4me1.q.05_peak_525
1	21088817	21090254	h3k4me1.q.05_peak_526
1	21101848	21102154	h3k4me1.q.05_peak_527
1	21166404	21167496	h3k4me1.q.05_peak_528
1	21218337	21219885	h3k4me1.q.05_peak_529
1	21231482	21232758	h3k4me1.q.05_peak_530
1	21271466	21272505	h3k4me1.q.05_peak_531
1	21324389	21324602	h3k4me1.q.05_peak_532
1	21406834	21407818	h3k4me1.q.05_peak_533
1	21410665	21413036	h3k4me1.q.05_peak_534
1	21414506	21415469	h3k4me1.q.05_peak_535
1	21417733	21418807	h3k4me1.q.05_peak_536
1	21419022	21419452	h3k4me1.q.05_peak_537
1	21434706	21438126	h3k4me1.q.05_peak_538
1	21458838	21459535	h3k4me1.q.05_peak_539
1	21499690	21500363	h3k4me1.q.05_peak_540
1	21535332	21535978	h3k4me1.q.05_peak_541
1	21593078	21594617	h3k4me1.q.05_peak_542
1	21616608	21617458	h3k4me1.q.05_peak_543
1	21635748	21636271	h3k4me1.q.05_peak_544
1	21649952	21651695	h3k4me1.q.05_peak_545
1	21658358	21662203	h3k4me1.q.05_peak_546
1	21690065	21690858	h3k4me1.q.05_peak_547
1	21745320	21745752	h3k4me1.q.05_peak_548
1	21773715	21774195	h3k4me1.q.05_peak_549
1	21797890	21798810	h3k4me1.q.05_peak_550
1	21803417	21805839	h3k4me1.q.05_peak_551
1	21819478	21821341	h3k4me1.q.05_peak_552
1	21829094	21831022	h3k4me1.q.05_peak_553
1	21838131	21839320	h3k4me1.q.05_peak_554
1	21868486	21868737	h3k4me1.q.05_peak_555
1	21923050	21923917	h3k4me1.q.05_peak_556
1	21928443	21929359	h3k4me1.q.05_peak_557
1	21958115	21958681	h3k4me1.q.05_peak_558
1	21959501	21963192	h3k4me1.q.05_peak_559
1	21963510	21963804	h3k4me1.q.05_peak_560
1	22035915	22036786	h3k4me1.q.05_peak_561
1	22069431	22071541	h3k4me1.q.05_peak_562
1	22111260	22111663	h3k4me1.q.05_peak_563
1	22206803	22207558	h3k4me1.q.05_peak_564
1	22258538	22259232	h3k4me1.q.05_peak_565
1	22261683	22264231	h3k4me1.q.05_peak_566
1	22266202	22267890	h3k4me1.q.05_peak_567
1	22268174	22269100	h3k4me1.q.05_peak_568
1	22315571	22315871	h3k4me1.q.05_peak_569
1	22320648	22321254	h3k4me1.q.05_peak_570
1	22339028	22339526	h3k4me1.q.05_peak_571
1	22354170	22354445	h3k4me1.q.05_peak_572
1	22367755	22368219	h3k4me1.q.05_peak_573
1	22377010	22378502	h3k4me1.q.05_peak_574
1	22475682	22476181	h3k4me1.q.05_peak_575
1	22509165	22509572	h3k4me1.q.05_peak_576
1	22534351	22534740	h3k4me1.q.05_peak_577
1	22587486	22587796	h3k4me1.q.05_peak_578
1	22594756	22595231	h3k4me1.q.05_peak_579
1	22607618	22608976	h3k4me1.q.05_peak_580
1	22628960	22629162	h3k4me1.q.05_peak_581
1	22640405	22640831	h3k4me1.q.05_peak_582
1	22652101	22652455	h3k4me1.q.05_peak_583
1	22690241	22691552	h3k4me1.q.05_peak_584
1	22694663	22695960	h3k4me1.q.05_peak_585
1	22717710	22718103	h3k4me1.q.05_peak_586
1	22769337	22771574	h3k4me1.q.05_peak_587
1	22771927	22772164	h3k4me1.q.05_peak_588
1	22789187	22789774	h3k4me1.q.05_peak_589
1	22803095	22805353	h3k4me1.q.05_peak_590
1	22806251	22807217	h3k4me1.q.05_peak_591
1	22893275	22893834	h3k4me1.q.05_peak_592
1	22902539	22903377	h3k4me1.q.05_peak_593
1	22987435	22988919	h3k4me1.q.05_peak_594
1	23003432	23005843	h3k4me1.q.05_peak_595
1	23007602	23008706	h3k4me1.q.05_peak_596
1	23087023	23088255	h3k4me1.q.05_peak_597
1	23097031	23098539	h3k4me1.q.05_peak_598
1	23104701	23105701	h3k4me1.q.05_peak_599
1	23117762	23118700	h3k4me1.q.05_peak_600
1	23145821	23147296	h3k4me1.q.05_peak_601
1	23162801	23163168	h3k4me1.q.05_peak_602
1	23173421	23173707	h3k4me1.q.05_peak_603
1	23178375	23178576	h3k4me1.q.05_peak_604
1	23202482	23203366	h3k4me1.q.05_peak_605
1	23206785	23207511	h3k4me1.q.05_peak_606
1	23214272	23216392	h3k4me1.q.05_peak_607
1	23255712	23256107	h3k4me1.q.05_peak_608
1	23257172	23262680	h3k4me1.q.05_peak_609
1	23263327	23266349	h3k4me1.q.05_peak_610
1	23270358	23271905	h3k4me1.q.05_peak_611
1	23275589	23278196	h3k4me1.q.05_peak_612
1	23320711	23322789	h3k4me1.q.05_peak_613
1	23351677	23352365	h3k4me1.q.05_peak_614
1	23370654	23370983	h3k4me1.q.05_peak_615
1	23377555	23377992	h3k4me1.q.05_peak_616
1	23378220	23382584	h3k4me1.q.05_peak_617
1	23444282	23444541	h3k4me1.q.05_peak_618
1	23463820	23464470	h3k4me1.q.05_peak_619
1	23474329	23474554	h3k4me1.q.05_peak_620
1	23485482	23485759	h3k4me1.q.05_peak_621
1	23489445	23491601	h3k4me1.q.05_peak_622
1	23495139	23495437	h3k4me1.q.05_peak_623
1	23559706	23560913	h3k4me1.q.05_peak_624
1	23573427	23576828	h3k4me1.q.05_peak_625
1	23604145	23604680	h3k4me1.q.05_peak_626
1	23648961	23650352	h3k4me1.q.05_peak_627
1	23655973	23657445	h3k4me1.q.05_peak_628
1	23670100	23671467	h3k4me1.q.05_peak_629
1	23705032	23707086	h3k4me1.q.05_peak_630
1	23722287	23723656	h3k4me1.q.05_peak_631
1	23750664	23751889	h3k4me1.q.05_peak_632
1	23757097	23757675	h3k4me1.q.05_peak_633
1	23760741	23766520	h3k4me1.q.05_peak_634
1	23766753	23768109	h3k4me1.q.05_peak_635
1	23774876	23775198	h3k4me1.q.05_peak_636
1	23775450	23776186	h3k4me1.q.05_peak_637
1	23827046	23827456	h3k4me1.q.05_peak_638
1	23832751	23836455	h3k4me1.q.05_peak_639
1	23844639	23847574	h3k4me1.q.05_peak_640
1	23850527	23851564	h3k4me1.q.05_peak_641
1	23883381	23885395	h3k4me1.q.05_peak_642
1	23897636	23898662	h3k4me1.q.05_peak_643
1	23911992	23913634	h3k4me1.q.05_peak_644
1	23919058	23921790	h3k4me1.q.05_peak_645
1	23934992	23935326	h3k4me1.q.05_peak_646
1	23947953	23949252	h3k4me1.q.05_peak_647
1	23953880	23954252	h3k4me1.q.05_peak_648
1	24004005	24005899	h3k4me1.q.05_peak_649
1	24027274	24027604	h3k4me1.q.05_peak_650
1	24042973	24043668	h3k4me1.q.05_peak_651
1	24055919	24056153	h3k4me1.q.05_peak_652
1	24069965	24070383	h3k4me1.q.05_peak_653
1	24071979	24075419	h3k4me1.q.05_peak_654
1	24084712	24085706	h3k4me1.q.05_peak_655
1	24085967	24086952	h3k4me1.q.05_peak_656
1	24089821	24090565	h3k4me1.q.05_peak_657
1	24096495	24099536	h3k4me1.q.05_peak_658
1	24107037	24109263	h3k4me1.q.05_peak_659
1	24128121	24128377	h3k4me1.q.05_peak_660
1	24133934	24135006	h3k4me1.q.05_peak_661
1	24139436	24141003	h3k4me1.q.05_peak_662
1	24171195	24171869	h3k4me1.q.05_peak_663
1	24172613	24172834	h3k4me1.q.05_peak_664
1	24194444	24197229	h3k4me1.q.05_peak_665
1	24211349	24212938	h3k4me1.q.05_peak_666
1	24219142	24219434	h3k4me1.q.05_peak_667
1	24222150	24224216	h3k4me1.q.05_peak_668
1	24224445	24228560	h3k4me1.q.05_peak_669
1	24229860	24234144	h3k4me1.q.05_peak_670
1	24238777	24239038	h3k4me1.q.05_peak_671
1	24239323	24242044	h3k4me1.q.05_peak_672
1	24245135	24246977	h3k4me1.q.05_peak_673
1	24248291	24249284	h3k4me1.q.05_peak_674
1	24257346	24259835	h3k4me1.q.05_peak_675
1	24261745	24262307	h3k4me1.q.05_peak_676
1	24266952	24267272	h3k4me1.q.05_peak_677
1	24273472	24273922	h3k4me1.q.05_peak_678
1	24304195	24305258	h3k4me1.q.05_peak_679
1	24309992	24310454	h3k4me1.q.05_peak_680
1	24325957	24326439	h3k4me1.q.05_peak_681
1	24362205	24362478	h3k4me1.q.05_peak_682
1	24367600	24368324	h3k4me1.q.05_peak_683
1	24373734	24374576	h3k4me1.q.05_peak_684
1	24379314	24379948	h3k4me1.q.05_peak_685
1	24428275	24428647	h3k4me1.q.05_peak_686
1	24452193	24453454	h3k4me1.q.05_peak_687
1	24459287	24459686	h3k4me1.q.05_peak_688
1	24494993	24495554	h3k4me1.q.05_peak_689
1	24515049	24518122	h3k4me1.q.05_peak_690
1	24531826	24533112	h3k4me1.q.05_peak_691
1	24539441	24540749	h3k4me1.q.05_peak_692
1	24562468	24562836	h3k4me1.q.05_peak_693
1	24563057	24563420	h3k4me1.q.05_peak_694
1	24586074	24587992	h3k4me1.q.05_peak_695
1	24602084	24602952	h3k4me1.q.05_peak_696
1	24633026	24633418	h3k4me1.q.05_peak_697
1	24678138	24678448	h3k4me1.q.05_peak_698
1	24679219	24680958	h3k4me1.q.05_peak_699
1	24685969	24687162	h3k4me1.q.05_peak_700
1	24703169	24703952	h3k4me1.q.05_peak_701
1	24719422	24720765	h3k4me1.q.05_peak_702
1	24740865	24741659	h3k4me1.q.05_peak_703
1	24758601	24761978	h3k4me1.q.05_peak_704
1	24773371	24774239	h3k4me1.q.05_peak_705
1	24814004	24815446	h3k4me1.q.05_peak_706
1	24819758	24820431	h3k4me1.q.05_peak_707
1	24831684	24832978	h3k4me1.q.05_peak_708
1	24869565	24871764	h3k4me1.q.05_peak_709
1	24904875	24905712	h3k4me1.q.05_peak_710
1	24936767	24940152	h3k4me1.q.05_peak_711
1	24942504	24944080	h3k4me1.q.05_peak_712
1	24951211	24952497	h3k4me1.q.05_peak_713
1	25008566	25009326	h3k4me1.q.05_peak_714
1	25012643	25014388	h3k4me1.q.05_peak_715
1	25032921	25034905	h3k4me1.q.05_peak_716
1	25057038	25058585	h3k4me1.q.05_peak_717
1	25074906	25075360	h3k4me1.q.05_peak_718
1	25081951	25083727	h3k4me1.q.05_peak_719
1	25084480	25089793	h3k4me1.q.05_peak_720
1	25096659	25097250	h3k4me1.q.05_peak_721
1	25101727	25103541	h3k4me1.q.05_peak_722
1	25103763	25109317	h3k4me1.q.05_peak_723
1	25129994	25133183	h3k4me1.q.05_peak_724
1	25163669	25164016	h3k4me1.q.05_peak_725
1	25165121	25167733	h3k4me1.q.05_peak_726
1	25173990	25174376	h3k4me1.q.05_peak_727
1	25174731	25175203	h3k4me1.q.05_peak_728
1	25177390	25181960	h3k4me1.q.05_peak_729
1	25183848	25184965	h3k4me1.q.05_peak_730
1	25186049	25186507	h3k4me1.q.05_peak_731
1	25189072	25189588	h3k4me1.q.05_peak_732
1	25191733	25192849	h3k4me1.q.05_peak_733
1	25226265	25226716	h3k4me1.q.05_peak_734
1	25227071	25229836	h3k4me1.q.05_peak_735
1	25242385	25242898	h3k4me1.q.05_peak_736
1	25292716	25293756	h3k4me1.q.05_peak_737
1	25310191	25310463	h3k4me1.q.05_peak_738
1	25420676	25421067	h3k4me1.q.05_peak_739
1	25430326	25431255	h3k4me1.q.05_peak_740
1	25435355	25436108	h3k4me1.q.05_peak_741
1	25442258	25443056	h3k4me1.q.05_peak_742
1	25503842	25504932	h3k4me1.q.05_peak_743
1	25569984	25570465	h3k4me1.q.05_peak_744
1	25588205	25588999	h3k4me1.q.05_peak_745
1	25621563	25621877	h3k4me1.q.05_peak_746
1	25682029	25682608	h3k4me1.q.05_peak_747
1	25682911	25683263	h3k4me1.q.05_peak_748
1	25693274	25693480	h3k4me1.q.05_peak_749
1	25695939	25696140	h3k4me1.q.05_peak_750
1	25696913	25699449	h3k4me1.q.05_peak_751
1	25704162	25705105	h3k4me1.q.05_peak_752
1	25744537	25744744	h3k4me1.q.05_peak_753
1	25744959	25745602	h3k4me1.q.05_peak_754
1	25754203	25757029	h3k4me1.q.05_peak_755
1	25774783	25779353	h3k4me1.q.05_peak_756
1	25811116	25812934	h3k4me1.q.05_peak_757
1	25821811	25829272	h3k4me1.q.05_peak_758
1	25830569	25833100	h3k4me1.q.05_peak_759
1	25854341	25855233	h3k4me1.q.05_peak_760
1	25891010	25894585	h3k4me1.q.05_peak_761
1	25895686	25896774	h3k4me1.q.05_peak_762
1	25920086	25921126	h3k4me1.q.05_peak_763
1	25921378	25921597	h3k4me1.q.05_peak_764
1	25938251	25939289	h3k4me1.q.05_peak_765
1	25974265	25975323	h3k4me1.q.05_peak_766
1	26229481	26230132	h3k4me1.q.05_peak_767
1	26255938	26257133	h3k4me1.q.05_peak_768
1	26281963	26283903	h3k4me1.q.05_peak_769
1	26289652	26290991	h3k4me1.q.05_peak_770
1	26387529	26389764	h3k4me1.q.05_peak_771
1	26507515	26508488	h3k4me1.q.05_peak_772
1	26631529	26631925	h3k4me1.q.05_peak_773
1	26640026	26640373	h3k4me1.q.05_peak_774
1	26757336	26757808	h3k4me1.q.05_peak_775
1	26857642	26858089	h3k4me1.q.05_peak_776
1	27115696	27115987	h3k4me1.q.05_peak_777
1	27169477	27170182	h3k4me1.q.05_peak_778
1	27264970	27265423	h3k4me1.q.05_peak_779
1	27510973	27511441	h3k4me1.q.05_peak_780
1	27531929	27532195	h3k4me1.q.05_peak_781
1	27579127	27579554	h3k4me1.q.05_peak_782
1	27615467	27617193	h3k4me1.q.05_peak_783
1	27628746	27629740	h3k4me1.q.05_peak_784
1	27641807	27642545	h3k4me1.q.05_peak_785
1	27889352	27890165	h3k4me1.q.05_peak_786
1	27996483	27996911	h3k4me1.q.05_peak_787
1	27997333	27997576	h3k4me1.q.05_peak_788
1	27997828	27998645	h3k4me1.q.05_peak_789
1	28015594	28016733	h3k4me1.q.05_peak_790
1	28025592	28026042	h3k4me1.q.05_peak_791
1	28045429	28048241	h3k4me1.q.05_peak_792
1	28083650	28084618	h3k4me1.q.05_peak_793
1	28090888	28091260	h3k4me1.q.05_peak_794
1	28143779	28144038	h3k4me1.q.05_peak_795
1	28144309	28146200	h3k4me1.q.05_peak_796
1	28213770	28215639	h3k4me1.q.05_peak_797
1	28270198	28271343	h3k4me1.q.05_peak_798
1	28323208	28323791	h3k4me1.q.05_peak_799
1	28324026	28324704	h3k4me1.q.05_peak_800
1	28339974	28340278	h3k4me1.q.05_peak_801
1	28348322	28349148	h3k4me1.q.05_peak_802
1	28640686	28642000	h3k4me1.q.05_peak_803
1	28642588	28643147	h3k4me1.q.05_peak_804
1	28677458	28678104	h3k4me1.q.05_peak_805
1	28806602	28807186	h3k4me1.q.05_peak_806
1	28808617	28809297	h3k4me1.q.05_peak_807
1	28870962	28871182	h3k4me1.q.05_peak_808
1	29013741	29013981	h3k4me1.q.05_peak_809
1	29067940	29068181	h3k4me1.q.05_peak_810
1	29182516	29183246	h3k4me1.q.05_peak_811
1	29198855	29199241	h3k4me1.q.05_peak_812
1	29214359	29215380	h3k4me1.q.05_peak_813
1	29216175	29218343	h3k4me1.q.05_peak_814
1	29361733	29362147	h3k4me1.q.05_peak_815
1	29404232	29405128	h3k4me1.q.05_peak_816
1	29508817	29510424	h3k4me1.q.05_peak_817
1	29587490	29588130	h3k4me1.q.05_peak_818
1	29594601	29595490	h3k4me1.q.05_peak_819
1	29691928	29692176	h3k4me1.q.05_peak_820
1	29733831	29734920	h3k4me1.q.05_peak_821
1	29931350	29932660	h3k4me1.q.05_peak_822
1	30008820	30009620	h3k4me1.q.05_peak_823
1	30017652	30017984	h3k4me1.q.05_peak_824
1	30059993	30062319	h3k4me1.q.05_peak_825
1	30181238	30181990	h3k4me1.q.05_peak_826
1	30204631	30205191	h3k4me1.q.05_peak_827
1	30216781	30217316	h3k4me1.q.05_peak_828
1	30318061	30318562	h3k4me1.q.05_peak_829
1	30536936	30537864	h3k4me1.q.05_peak_830
1	30582673	30583975	h3k4me1.q.05_peak_831
1	30588357	30589070	h3k4me1.q.05_peak_832
1	30590228	30591508	h3k4me1.q.05_peak_833
1	30594202	30596036	h3k4me1.q.05_peak_834
1	30639425	30640571	h3k4me1.q.05_peak_835
1	30700317	30701506	h3k4me1.q.05_peak_836
1	30755239	30757057	h3k4me1.q.05_peak_837
1	30778424	30778821	h3k4me1.q.05_peak_838
1	30788894	30790510	h3k4me1.q.05_peak_839
1	30870372	30872851	h3k4me1.q.05_peak_840
1	30873950	30874825	h3k4me1.q.05_peak_841
1	30945230	30948542	h3k4me1.q.05_peak_842
1	30950007	30951388	h3k4me1.q.05_peak_843
1	31014118	31014874	h3k4me1.q.05_peak_844
1	31033839	31035105	h3k4me1.q.05_peak_845
1	31051872	31052189	h3k4me1.q.05_peak_846
1	31058524	31059922	h3k4me1.q.05_peak_847
1	31064588	31066180	h3k4me1.q.05_peak_848
1	31102899	31103571	h3k4me1.q.05_peak_849
1	31178059	31178883	h3k4me1.q.05_peak_850
1	31204833	31207093	h3k4me1.q.05_peak_851
1	31232384	31234528	h3k4me1.q.05_peak_852
1	31452637	31452850	h3k4me1.q.05_peak_853
1	31636105	31639178	h3k4me1.q.05_peak_854
1	31639946	31640374	h3k4me1.q.05_peak_855
1	31644861	31645762	h3k4me1.q.05_peak_856
1	31647589	31647787	h3k4me1.q.05_peak_857
1	31776846	31777226	h3k4me1.q.05_peak_858
1	31871386	31871827	h3k4me1.q.05_peak_859
1	32170989	32174297	h3k4me1.q.05_peak_860
1	32174586	32176834	h3k4me1.q.05_peak_861
1	32192254	32192824	h3k4me1.q.05_peak_862
1	32197344	32197757	h3k4me1.q.05_peak_863
1	32230777	32231184	h3k4me1.q.05_peak_864
1	32270561	32270828	h3k4me1.q.05_peak_865
1	32274833	32276439	h3k4me1.q.05_peak_866
1	32308456	32310603	h3k4me1.q.05_peak_867
1	32363417	32364403	h3k4me1.q.05_peak_868
1	32396890	32398581	h3k4me1.q.05_peak_869
1	32428283	32428753	h3k4me1.q.05_peak_870
1	32432756	32433065	h3k4me1.q.05_peak_871
1	32462206	32464891	h3k4me1.q.05_peak_872
1	32471668	32471919	h3k4me1.q.05_peak_873
1	32552466	32555464	h3k4me1.q.05_peak_874
1	32568336	32569420	h3k4me1.q.05_peak_875
1	32625715	32626484	h3k4me1.q.05_peak_876
1	32632682	32634031	h3k4me1.q.05_peak_877
1	32634819	32635234	h3k4me1.q.05_peak_878
1	32649639	32650452	h3k4me1.q.05_peak_879
1	32786959	32787432	h3k4me1.q.05_peak_880
1	32805735	32806637	h3k4me1.q.05_peak_881
1	32887440	32888206	h3k4me1.q.05_peak_882
1	32946216	32946856	h3k4me1.q.05_peak_883
1	32985561	32985849	h3k4me1.q.05_peak_884
1	33024076	33028118	h3k4me1.q.05_peak_885
1	33030969	33031289	h3k4me1.q.05_peak_886
1	33040704	33043456	h3k4me1.q.05_peak_887
1	33097236	33098509	h3k4me1.q.05_peak_888
1	33124699	33125239	h3k4me1.q.05_peak_889
1	33173785	33174319	h3k4me1.q.05_peak_890
1	33190134	33190892	h3k4me1.q.05_peak_891
1	33195207	33195414	h3k4me1.q.05_peak_892
1	33201449	33202525	h3k4me1.q.05_peak_893
1	33213698	33216450	h3k4me1.q.05_peak_894
1	33265964	33266453	h3k4me1.q.05_peak_895
1	33268239	33270550	h3k4me1.q.05_peak_896
1	33271097	33272140	h3k4me1.q.05_peak_897
1	33358161	33359216	h3k4me1.q.05_peak_898
1	33361378	33364060	h3k4me1.q.05_peak_899
1	33380872	33381209	h3k4me1.q.05_peak_900
1	33459888	33460976	h3k4me1.q.05_peak_901
1	33490166	33490554	h3k4me1.q.05_peak_902
1	33493877	33497104	h3k4me1.q.05_peak_903
1	33498818	33500900	h3k4me1.q.05_peak_904
1	33501452	33504196	h3k4me1.q.05_peak_905
1	33527692	33528130	h3k4me1.q.05_peak_906
1	33528519	33528759	h3k4me1.q.05_peak_907
1	33531120	33532239	h3k4me1.q.05_peak_908
1	33534583	33534866	h3k4me1.q.05_peak_909
1	33578691	33579331	h3k4me1.q.05_peak_910
1	33583889	33584111	h3k4me1.q.05_peak_911
1	33588523	33589953	h3k4me1.q.05_peak_912
1	33595278	33595826	h3k4me1.q.05_peak_913
1	33599069	33600060	h3k4me1.q.05_peak_914
1	33608122	33610663	h3k4me1.q.05_peak_915
1	33625907	33626343	h3k4me1.q.05_peak_916
1	33645223	33646281	h3k4me1.q.05_peak_917
1	33646987	33647346	h3k4me1.q.05_peak_918
1	33668304	33669295	h3k4me1.q.05_peak_919
1	33670475	33671087	h3k4me1.q.05_peak_920
1	33671395	33673294	h3k4me1.q.05_peak_921
1	33676955	33677248	h3k4me1.q.05_peak_922
1	33700524	33701928	h3k4me1.q.05_peak_923
1	33714424	33715132	h3k4me1.q.05_peak_924
1	33720562	33722034	h3k4me1.q.05_peak_925
1	33751039	33751830	h3k4me1.q.05_peak_926
1	33754257	33758859	h3k4me1.q.05_peak_927
1	33811562	33813729	h3k4me1.q.05_peak_928
1	33814731	33815129	h3k4me1.q.05_peak_929
1	33843505	33844610	h3k4me1.q.05_peak_930
1	33906760	33907638	h3k4me1.q.05_peak_931
1	33908335	33910680	h3k4me1.q.05_peak_932
1	33931625	33933804	h3k4me1.q.05_peak_933
1	33935559	33936729	h3k4me1.q.05_peak_934
1	33938790	33939215	h3k4me1.q.05_peak_935
1	33945466	33946053	h3k4me1.q.05_peak_936
1	33946549	33947677	h3k4me1.q.05_peak_937
1	33948111	33948948	h3k4me1.q.05_peak_938
1	33979816	33980895	h3k4me1.q.05_peak_939
1	33994037	33994256	h3k4me1.q.05_peak_940
1	34003317	34003790	h3k4me1.q.05_peak_941
1	34004102	34005957	h3k4me1.q.05_peak_942
1	34006209	34009525	h3k4me1.q.05_peak_943
1	34010473	34011496	h3k4me1.q.05_peak_944
1	34011957	34013928	h3k4me1.q.05_peak_945
1	34018936	34019261	h3k4me1.q.05_peak_946
1	34021387	34021959	h3k4me1.q.05_peak_947
1	34023232	34023620	h3k4me1.q.05_peak_948
1	34023818	34024560	h3k4me1.q.05_peak_949
1	34040458	34042597	h3k4me1.q.05_peak_950
1	34042859	34043142	h3k4me1.q.05_peak_951
1	34045342	34045631	h3k4me1.q.05_peak_952
1	34047047	34048608	h3k4me1.q.05_peak_953
1	34051111	34053370	h3k4me1.q.05_peak_954
1	34060196	34061336	h3k4me1.q.05_peak_955
1	34061835	34063338	h3k4me1.q.05_peak_956
1	34073512	34075319	h3k4me1.q.05_peak_957
1	34076693	34077249	h3k4me1.q.05_peak_958
1	34094112	34095332	h3k4me1.q.05_peak_959
1	34096654	34101296	h3k4me1.q.05_peak_960
1	34102993	34107524	h3k4me1.q.05_peak_961
1	34109947	34110600	h3k4me1.q.05_peak_962
1	34119257	34122071	h3k4me1.q.05_peak_963
1	34124057	34125327	h3k4me1.q.05_peak_964
1	34130416	34131534	h3k4me1.q.05_peak_965
1	34132945	34134665	h3k4me1.q.05_peak_966
1	34138254	34141772	h3k4me1.q.05_peak_967
1	34142983	34143560	h3k4me1.q.05_peak_968
1	34144877	34145325	h3k4me1.q.05_peak_969
1	34146006	34147108	h3k4me1.q.05_peak_970
1	34149868	34151226	h3k4me1.q.05_peak_971
1	34154976	34155989	h3k4me1.q.05_peak_972
1	34158071	34160425	h3k4me1.q.05_peak_973
1	34164688	34168294	h3k4me1.q.05_peak_974
1	34182328	34184552	h3k4me1.q.05_peak_975
1	34233246	34238914	h3k4me1.q.05_peak_976
1	34296613	34301347	h3k4me1.q.05_peak_977
1	34303538	34305141	h3k4me1.q.05_peak_978
1	34310572	34311714	h3k4me1.q.05_peak_979
1	34388137	34390217	h3k4me1.q.05_peak_980
1	34395921	34397689	h3k4me1.q.05_peak_981
1	34398942	34400296	h3k4me1.q.05_peak_982
1	34401927	34403157	h3k4me1.q.05_peak_983
1	34432575	34434720	h3k4me1.q.05_peak_984
1	34435202	34435737	h3k4me1.q.05_peak_985
1	34440524	34441483	h3k4me1.q.05_peak_986
1	34458704	34460285	h3k4me1.q.05_peak_987
1	34472536	34473219	h3k4me1.q.05_peak_988
1	34536322	34537548	h3k4me1.q.05_peak_989
1	34578695	34580028	h3k4me1.q.05_peak_990
1	34582172	34582653	h3k4me1.q.05_peak_991
1	34583035	34585249	h3k4me1.q.05_peak_992
1	34663655	34667407	h3k4me1.q.05_peak_993
1	34671716	34672034	h3k4me1.q.05_peak_994
1	34675309	34676781	h3k4me1.q.05_peak_995
1	34677261	34679694	h3k4me1.q.05_peak_996
1	34687000	34687232	h3k4me1.q.05_peak_997
1	34687562	34688352	h3k4me1.q.05_peak_998
1	34696058	34697282	h3k4me1.q.05_peak_999
1	34700259	34700689	h3k4me1.q.05_peak_1000
1	34745898	34746165	h3k4me1.q.05_peak_1001
1	34749269	34750547	h3k4me1.q.05_peak_1002
1	34751026	34751773	h3k4me1.q.05_peak_1003
1	34801331	34801913	h3k4me1.q.05_peak_1004
1	34802144	34802616	h3k4me1.q.05_peak_1005
1	34803009	34803346	h3k4me1.q.05_peak_1006
1	34804569	34806702	h3k4me1.q.05_peak_1007
1	34833982	34834243	h3k4me1.q.05_peak_1008
1	34836592	34836890	h3k4me1.q.05_peak_1009
1	34837243	34841892	h3k4me1.q.05_peak_1010
1	34849507	34849934	h3k4me1.q.05_peak_1011
1	34850603	34853057	h3k4me1.q.05_peak_1012
1	34962222	34962600	h3k4me1.q.05_peak_1013
1	34987725	34988276	h3k4me1.q.05_peak_1014
1	35095847	35096107	h3k4me1.q.05_peak_1015
1	35232711	35233216	h3k4me1.q.05_peak_1016
1	35243046	35243255	h3k4me1.q.05_peak_1017
1	35265091	35266070	h3k4me1.q.05_peak_1018
1	35387604	35388266	h3k4me1.q.05_peak_1019
1	35388489	35388687	h3k4me1.q.05_peak_1020
1	35389440	35389841	h3k4me1.q.05_peak_1021
1	35391108	35391406	h3k4me1.q.05_peak_1022
1	35400942	35401829	h3k4me1.q.05_peak_1023
1	35415741	35416664	h3k4me1.q.05_peak_1024
1	35468239	35469800	h3k4me1.q.05_peak_1025
1	35586299	35586781	h3k4me1.q.05_peak_1026
1	35588643	35589622	h3k4me1.q.05_peak_1027
1	35651815	35652090	h3k4me1.q.05_peak_1028
1	35652610	35654407	h3k4me1.q.05_peak_1029
1	35682477	35683899	h3k4me1.q.05_peak_1030
1	35693947	35696210	h3k4me1.q.05_peak_1031
1	35697266	35698834	h3k4me1.q.05_peak_1032
1	35701419	35701949	h3k4me1.q.05_peak_1033
1	35723050	35724161	h3k4me1.q.05_peak_1034
1	35729958	35730711	h3k4me1.q.05_peak_1035
1	35749596	35751000	h3k4me1.q.05_peak_1036
1	35804030	35804474	h3k4me1.q.05_peak_1037
1	35805998	35807208	h3k4me1.q.05_peak_1038
1	35810615	35812302	h3k4me1.q.05_peak_1039
1	35823685	35825212	h3k4me1.q.05_peak_1040
1	35864363	35864609	h3k4me1.q.05_peak_1041
1	35864813	35865033	h3k4me1.q.05_peak_1042
1	35869217	35871072	h3k4me1.q.05_peak_1043
1	35874329	35876522	h3k4me1.q.05_peak_1044
1	35878649	35880427	h3k4me1.q.05_peak_1045
1	35911792	35912165	h3k4me1.q.05_peak_1046
1	35919581	35920843	h3k4me1.q.05_peak_1047
1	35935083	35937086	h3k4me1.q.05_peak_1048
1	35941193	35942731	h3k4me1.q.05_peak_1049
1	35944553	35945090	h3k4me1.q.05_peak_1050
1	35951046	35951333	h3k4me1.q.05_peak_1051
1	35957104	35958452	h3k4me1.q.05_peak_1052
1	35973450	35973681	h3k4me1.q.05_peak_1053
1	36003328	36004764	h3k4me1.q.05_peak_1054
1	36008948	36009641	h3k4me1.q.05_peak_1055
1	36016666	36017990	h3k4me1.q.05_peak_1056
1	36059774	36061445	h3k4me1.q.05_peak_1057
1	36064117	36066143	h3k4me1.q.05_peak_1058
1	36067717	36068203	h3k4me1.q.05_peak_1059
1	36069238	36073586	h3k4me1.q.05_peak_1060
1	36076498	36078212	h3k4me1.q.05_peak_1061
1	36087728	36090993	h3k4me1.q.05_peak_1062
1	36094961	36096769	h3k4me1.q.05_peak_1063
1	36131212	36131530	h3k4me1.q.05_peak_1064
1	36241876	36242159	h3k4me1.q.05_peak_1065
1	36242500	36243703	h3k4me1.q.05_peak_1066
1	36254797	36255882	h3k4me1.q.05_peak_1067
1	36302745	36303544	h3k4me1.q.05_peak_1068
1	36308239	36310404	h3k4me1.q.05_peak_1069
1	36323755	36324154	h3k4me1.q.05_peak_1070
1	36366849	36368356	h3k4me1.q.05_peak_1071
1	36401278	36402112	h3k4me1.q.05_peak_1072
1	36444079	36444850	h3k4me1.q.05_peak_1073
1	36445473	36445676	h3k4me1.q.05_peak_1074
1	36470975	36471607	h3k4me1.q.05_peak_1075
1	36472033	36477106	h3k4me1.q.05_peak_1076
1	36477421	36478891	h3k4me1.q.05_peak_1077
1	36513328	36515756	h3k4me1.q.05_peak_1078
1	36516070	36516477	h3k4me1.q.05_peak_1079
1	36517309	36518614	h3k4me1.q.05_peak_1080
1	36522471	36525294	h3k4me1.q.05_peak_1081
1	36526678	36531216	h3k4me1.q.05_peak_1082
1	36537481	36538302	h3k4me1.q.05_peak_1083
1	36545612	36547217	h3k4me1.q.05_peak_1084
1	36547429	36549394	h3k4me1.q.05_peak_1085
1	36554055	36556551	h3k4me1.q.05_peak_1086
1	36558434	36559614	h3k4me1.q.05_peak_1087
1	36574164	36575589	h3k4me1.q.05_peak_1088
1	36579613	36581791	h3k4me1.q.05_peak_1089
1	36588822	36589966	h3k4me1.q.05_peak_1090
1	36590720	36591168	h3k4me1.q.05_peak_1091
1	36595478	36596599	h3k4me1.q.05_peak_1092
1	36602837	36604514	h3k4me1.q.05_peak_1093
1	36606496	36607615	h3k4me1.q.05_peak_1094
1	36611449	36612048	h3k4me1.q.05_peak_1095
1	36614864	36616007	h3k4me1.q.05_peak_1096
1	36628127	36628394	h3k4me1.q.05_peak_1097
1	36635533	36637548	h3k4me1.q.05_peak_1098
1	36637984	36638716	h3k4me1.q.05_peak_1099
1	36645876	36646674	h3k4me1.q.05_peak_1100
1	36683750	36684518	h3k4me1.q.05_peak_1101
1	36692276	36692536	h3k4me1.q.05_peak_1102
1	36708137	36709385	h3k4me1.q.05_peak_1103
1	36784911	36785599	h3k4me1.q.05_peak_1104
1	36859970	36862369	h3k4me1.q.05_peak_1105
1	36864245	36865275	h3k4me1.q.05_peak_1106
1	36877000	36877693	h3k4me1.q.05_peak_1107
1	36878951	36880228	h3k4me1.q.05_peak_1108
1	36883996	36885863	h3k4me1.q.05_peak_1109
1	36890873	36891902	h3k4me1.q.05_peak_1110
1	36892491	36893682	h3k4me1.q.05_peak_1111
1	36901435	36903500	h3k4me1.q.05_peak_1112
1	36904319	36905167	h3k4me1.q.05_peak_1113
1	36911802	36912206	h3k4me1.q.05_peak_1114
1	36919142	36922151	h3k4me1.q.05_peak_1115
1	36934734	36938787	h3k4me1.q.05_peak_1116
1	36949301	36950549	h3k4me1.q.05_peak_1117
1	36984113	36985354	h3k4me1.q.05_peak_1118
1	36985555	36986221	h3k4me1.q.05_peak_1119
1	36986571	36987147	h3k4me1.q.05_peak_1120
1	36996712	36997095	h3k4me1.q.05_peak_1121
1	37029509	37029870	h3k4me1.q.05_peak_1122
1	37060622	37061655	h3k4me1.q.05_peak_1123
1	37077096	37078704	h3k4me1.q.05_peak_1124
1	37081233	37082458	h3k4me1.q.05_peak_1125
1	37084241	37084592	h3k4me1.q.05_peak_1126
1	37087652	37088227	h3k4me1.q.05_peak_1127
1	37092701	37093901	h3k4me1.q.05_peak_1128
1	37096134	37098659	h3k4me1.q.05_peak_1129
1	37100469	37102983	h3k4me1.q.05_peak_1130
1	37104260	37106005	h3k4me1.q.05_peak_1131
1	37109713	37110541	h3k4me1.q.05_peak_1132
1	37120138	37120685	h3k4me1.q.05_peak_1133
1	37121731	37123655	h3k4me1.q.05_peak_1134
1	37124385	37125010	h3k4me1.q.05_peak_1135
1	37165243	37166719	h3k4me1.q.05_peak_1136
1	37187362	37187770	h3k4me1.q.05_peak_1137
1	37219760	37220746	h3k4me1.q.05_peak_1138
1	37248188	37248549	h3k4me1.q.05_peak_1139
1	37300084	37301695	h3k4me1.q.05_peak_1140
1	37332096	37333617	h3k4me1.q.05_peak_1141
1	37347263	37347896	h3k4me1.q.05_peak_1142
1	37350945	37351777	h3k4me1.q.05_peak_1143
1	37361227	37362130	h3k4me1.q.05_peak_1144
1	37381916	37382839	h3k4me1.q.05_peak_1145
1	37429001	37429627	h3k4me1.q.05_peak_1146
1	37430872	37431494	h3k4me1.q.05_peak_1147
1	37511635	37513674	h3k4me1.q.05_peak_1148
1	37533216	37533759	h3k4me1.q.05_peak_1149
1	37541313	37541590	h3k4me1.q.05_peak_1150
1	37585692	37585939	h3k4me1.q.05_peak_1151
1	37586151	37586750	h3k4me1.q.05_peak_1152
1	37687425	37688176	h3k4me1.q.05_peak_1153
1	37696363	37696600	h3k4me1.q.05_peak_1154
1	37732328	37732584	h3k4me1.q.05_peak_1155
1	37742314	37743466	h3k4me1.q.05_peak_1156
1	37744464	37745056	h3k4me1.q.05_peak_1157
1	37864135	37865871	h3k4me1.q.05_peak_1158
1	37871597	37872166	h3k4me1.q.05_peak_1159
1	37872437	37873457	h3k4me1.q.05_peak_1160
1	37889672	37889917	h3k4me1.q.05_peak_1161
1	37891125	37891579	h3k4me1.q.05_peak_1162
1	37956049	37957957	h3k4me1.q.05_peak_1163
1	37959063	37959975	h3k4me1.q.05_peak_1164
1	37998823	37999900	h3k4me1.q.05_peak_1165
1	38126550	38128780	h3k4me1.q.05_peak_1166
1	38130164	38130902	h3k4me1.q.05_peak_1167
1	38170366	38171015	h3k4me1.q.05_peak_1168
1	38192864	38194586	h3k4me1.q.05_peak_1169
1	38195702	38196176	h3k4me1.q.05_peak_1170
1	38196704	38201891	h3k4me1.q.05_peak_1171
1	38210611	38210984	h3k4me1.q.05_peak_1172
1	38255083	38255674	h3k4me1.q.05_peak_1173
1	38261885	38263857	h3k4me1.q.05_peak_1174
1	38267455	38268952	h3k4me1.q.05_peak_1175
1	38297801	38299060	h3k4me1.q.05_peak_1176
1	38307105	38309312	h3k4me1.q.05_peak_1177
1	38319536	38321132	h3k4me1.q.05_peak_1178
1	38333833	38335278	h3k4me1.q.05_peak_1179
1	38335508	38337665	h3k4me1.q.05_peak_1180
1	38358133	38359352	h3k4me1.q.05_peak_1181
1	38362748	38364807	h3k4me1.q.05_peak_1182
1	38366704	38369442	h3k4me1.q.05_peak_1183
1	38384507	38384931	h3k4me1.q.05_peak_1184
1	38388098	38389192	h3k4me1.q.05_peak_1185
1	38389391	38391531	h3k4me1.q.05_peak_1186
1	38393018	38395990	h3k4me1.q.05_peak_1187
1	38396732	38397080	h3k4me1.q.05_peak_1188
1	38401085	38402681	h3k4me1.q.05_peak_1189
1	38409792	38411641	h3k4me1.q.05_peak_1190
1	38416424	38419372	h3k4me1.q.05_peak_1191
1	38423798	38424421	h3k4me1.q.05_peak_1192
1	38425241	38427147	h3k4me1.q.05_peak_1193
1	38428449	38430181	h3k4me1.q.05_peak_1194
1	38432070	38432696	h3k4me1.q.05_peak_1195
1	38435630	38444571	h3k4me1.q.05_peak_1196
1	38445908	38446911	h3k4me1.q.05_peak_1197
1	38449628	38451794	h3k4me1.q.05_peak_1198
1	38457061	38457460	h3k4me1.q.05_peak_1199
1	38460208	38460813	h3k4me1.q.05_peak_1200
1	38461115	38461620	h3k4me1.q.05_peak_1201
1	38467125	38468581	h3k4me1.q.05_peak_1202
1	38478280	38478558	h3k4me1.q.05_peak_1203
1	38482010	38482926	h3k4me1.q.05_peak_1204
1	38488051	38489609	h3k4me1.q.05_peak_1205
1	38490601	38492248	h3k4me1.q.05_peak_1206
1	38496483	38497590	h3k4me1.q.05_peak_1207
1	38497825	38498288	h3k4me1.q.05_peak_1208
1	38501650	38504208	h3k4me1.q.05_peak_1209
1	38511474	38513218	h3k4me1.q.05_peak_1210
1	38538105	38538756	h3k4me1.q.05_peak_1211
1	38539529	38540413	h3k4me1.q.05_peak_1212
1	38544276	38546765	h3k4me1.q.05_peak_1213
1	38552711	38553344	h3k4me1.q.05_peak_1214
1	38561896	38562776	h3k4me1.q.05_peak_1215
1	38564673	38569528	h3k4me1.q.05_peak_1216
1	38578598	38579117	h3k4me1.q.05_peak_1217
1	38593921	38595498	h3k4me1.q.05_peak_1218
1	38601934	38602652	h3k4me1.q.05_peak_1219
1	38606229	38607834	h3k4me1.q.05_peak_1220
1	38617429	38618236	h3k4me1.q.05_peak_1221
1	38623191	38626675	h3k4me1.q.05_peak_1222
1	38627836	38635284	h3k4me1.q.05_peak_1223
1	38642171	38642481	h3k4me1.q.05_peak_1224
1	38648051	38648349	h3k4me1.q.05_peak_1225
1	38648624	38648959	h3k4me1.q.05_peak_1226
1	38666534	38666829	h3k4me1.q.05_peak_1227
1	38670837	38671132	h3k4me1.q.05_peak_1228
1	38695891	38697182	h3k4me1.q.05_peak_1229
1	38728686	38729194	h3k4me1.q.05_peak_1230
1	38729668	38731254	h3k4me1.q.05_peak_1231
1	38752798	38753296	h3k4me1.q.05_peak_1232
1	38757377	38758336	h3k4me1.q.05_peak_1233
1	38766771	38768022	h3k4me1.q.05_peak_1234
1	38785570	38787582	h3k4me1.q.05_peak_1235
1	38796610	38797298	h3k4me1.q.05_peak_1236
1	38816256	38816754	h3k4me1.q.05_peak_1237
1	38835318	38835565	h3k4me1.q.05_peak_1238
1	38842797	38843545	h3k4me1.q.05_peak_1239
1	38847424	38849757	h3k4me1.q.05_peak_1240
1	38876830	38877172	h3k4me1.q.05_peak_1241
1	38892441	38894459	h3k4me1.q.05_peak_1242
1	38896527	38897345	h3k4me1.q.05_peak_1243
1	38987284	38987572	h3k4me1.q.05_peak_1244
1	38988354	38988866	h3k4me1.q.05_peak_1245
1	38992184	38992440	h3k4me1.q.05_peak_1246
1	39024332	39025688	h3k4me1.q.05_peak_1247
1	39045668	39046915	h3k4me1.q.05_peak_1248
1	39086414	39086975	h3k4me1.q.05_peak_1249
1	39192454	39193695	h3k4me1.q.05_peak_1250
1	39194293	39195439	h3k4me1.q.05_peak_1251
1	39226873	39227199	h3k4me1.q.05_peak_1252
1	39245510	39246218	h3k4me1.q.05_peak_1253
1	39247594	39249023	h3k4me1.q.05_peak_1254
1	39249289	39249503	h3k4me1.q.05_peak_1255
1	39250699	39253130	h3k4me1.q.05_peak_1256
1	39256977	39257916	h3k4me1.q.05_peak_1257
1	39266886	39268870	h3k4me1.q.05_peak_1258
1	39281451	39281658	h3k4me1.q.05_peak_1259
1	39311691	39314740	h3k4me1.q.05_peak_1260
1	39337175	39337431	h3k4me1.q.05_peak_1261
1	39348864	39349311	h3k4me1.q.05_peak_1262
1	39366847	39367085	h3k4me1.q.05_peak_1263
1	39368967	39369902	h3k4me1.q.05_peak_1264
1	39387117	39388449	h3k4me1.q.05_peak_1265
1	39389583	39391144	h3k4me1.q.05_peak_1266
1	39439513	39440653	h3k4me1.q.05_peak_1267
1	39441345	39447195	h3k4me1.q.05_peak_1268
1	39461988	39462628	h3k4me1.q.05_peak_1269
1	39466195	39466423	h3k4me1.q.05_peak_1270
1	39476979	39477351	h3k4me1.q.05_peak_1271
1	39477611	39478275	h3k4me1.q.05_peak_1272
1	39482745	39483094	h3k4me1.q.05_peak_1273
1	39511871	39512397	h3k4me1.q.05_peak_1274
1	39536615	39537809	h3k4me1.q.05_peak_1275
1	39566915	39569311	h3k4me1.q.05_peak_1276
1	39574455	39576460	h3k4me1.q.05_peak_1277
1	39577558	39577788	h3k4me1.q.05_peak_1278
1	39598532	39599410	h3k4me1.q.05_peak_1279
1	39645894	39647119	h3k4me1.q.05_peak_1280
1	39649011	39651440	h3k4me1.q.05_peak_1281
1	39666959	39667252	h3k4me1.q.05_peak_1282
1	39695277	39695773	h3k4me1.q.05_peak_1283
1	39697611	39697936	h3k4me1.q.05_peak_1284
1	39698482	39699787	h3k4me1.q.05_peak_1285
1	39700014	39703366	h3k4me1.q.05_peak_1286
1	39710566	39711026	h3k4me1.q.05_peak_1287
1	39713873	39716919	h3k4me1.q.05_peak_1288
1	39720355	39721557	h3k4me1.q.05_peak_1289
1	39730558	39732390	h3k4me1.q.05_peak_1290
1	39741338	39741601	h3k4me1.q.05_peak_1291
1	39746292	39746982	h3k4me1.q.05_peak_1292
1	39749658	39750010	h3k4me1.q.05_peak_1293
1	39759502	39760482	h3k4me1.q.05_peak_1294
1	39761214	39762507	h3k4me1.q.05_peak_1295
1	39773437	39774582	h3k4me1.q.05_peak_1296
1	39803634	39805857	h3k4me1.q.05_peak_1297
1	39838253	39839918	h3k4me1.q.05_peak_1298
1	39857433	39857802	h3k4me1.q.05_peak_1299
1	39867842	39870691	h3k4me1.q.05_peak_1300
1	39884440	39885327	h3k4me1.q.05_peak_1301
1	39888594	39888809	h3k4me1.q.05_peak_1302
1	39895278	39895721	h3k4me1.q.05_peak_1303
1	39899650	39900296	h3k4me1.q.05_peak_1304
1	39902631	39910288	h3k4me1.q.05_peak_1305
1	39920435	39924247	h3k4me1.q.05_peak_1306
1	39925071	39925545	h3k4me1.q.05_peak_1307
1	39926091	39926324	h3k4me1.q.05_peak_1308
1	39927556	39928017	h3k4me1.q.05_peak_1309
1	39928300	39933487	h3k4me1.q.05_peak_1310
1	39934039	39935901	h3k4me1.q.05_peak_1311
1	39936385	39953340	h3k4me1.q.05_peak_1312
1	39957886	39958949	h3k4me1.q.05_peak_1313
1	39959657	39960301	h3k4me1.q.05_peak_1314
1	39960872	39964990	h3k4me1.q.05_peak_1315
1	39965371	39965614	h3k4me1.q.05_peak_1316
1	39968615	39973456	h3k4me1.q.05_peak_1317
1	39976509	39981127	h3k4me1.q.05_peak_1318
1	40083970	40084360	h3k4me1.q.05_peak_1319
1	40084559	40086263	h3k4me1.q.05_peak_1320
1	40092035	40093938	h3k4me1.q.05_peak_1321
1	40117645	40118152	h3k4me1.q.05_peak_1322
1	40266086	40267383	h3k4me1.q.05_peak_1323
1	40324778	40326162	h3k4me1.q.05_peak_1324
1	40514351	40516253	h3k4me1.q.05_peak_1325
1	40547271	40548270	h3k4me1.q.05_peak_1326
1	40680201	40682409	h3k4me1.q.05_peak_1327
1	40788860	40790648	h3k4me1.q.05_peak_1328
1	40790892	40791147	h3k4me1.q.05_peak_1329
1	40871272	40871537	h3k4me1.q.05_peak_1330
1	40873961	40874700	h3k4me1.q.05_peak_1331
1	40878803	40879937	h3k4me1.q.05_peak_1332
1	40880221	40881008	h3k4me1.q.05_peak_1333
1	40885752	40886221	h3k4me1.q.05_peak_1334
1	40887724	40890800	h3k4me1.q.05_peak_1335
1	40951788	40952026	h3k4me1.q.05_peak_1336
1	40954047	40955348	h3k4me1.q.05_peak_1337
1	40967051	40969477	h3k4me1.q.05_peak_1338
1	41001277	41002985	h3k4me1.q.05_peak_1339
1	41026883	41028850	h3k4me1.q.05_peak_1340
1	41032710	41033357	h3k4me1.q.05_peak_1341
1	41034181	41037718	h3k4me1.q.05_peak_1342
1	41053686	41056262	h3k4me1.q.05_peak_1343
1	41064754	41065892	h3k4me1.q.05_peak_1344
1	41114704	41114998	h3k4me1.q.05_peak_1345
1	41120259	41120497	h3k4me1.q.05_peak_1346
1	41120722	41123169	h3k4me1.q.05_peak_1347
1	41128077	41129158	h3k4me1.q.05_peak_1348
1	41131437	41131678	h3k4me1.q.05_peak_1349
1	41133834	41134040	h3k4me1.q.05_peak_1350
1	41139712	41141402	h3k4me1.q.05_peak_1351
1	41144376	41145922	h3k4me1.q.05_peak_1352
1	41151083	41160049	h3k4me1.q.05_peak_1353
1	41165659	41168749	h3k4me1.q.05_peak_1354
1	41235055	41236423	h3k4me1.q.05_peak_1355
1	41268218	41277399	h3k4me1.q.05_peak_1356
1	41286208	41286697	h3k4me1.q.05_peak_1357
1	41326018	41329677	h3k4me1.q.05_peak_1358
1	41349975	41351015	h3k4me1.q.05_peak_1359
1	41360279	41362153	h3k4me1.q.05_peak_1360
1	41379378	41382058	h3k4me1.q.05_peak_1361
1	41388839	41391430	h3k4me1.q.05_peak_1362
1	41410240	41412398	h3k4me1.q.05_peak_1363
1	41425541	41425871	h3k4me1.q.05_peak_1364
1	41426503	41432520	h3k4me1.q.05_peak_1365
1	41433496	41433788	h3k4me1.q.05_peak_1366
1	41441961	41442485	h3k4me1.q.05_peak_1367
1	41446981	41447311	h3k4me1.q.05_peak_1368
1	41506511	41506713	h3k4me1.q.05_peak_1369
1	41554762	41557677	h3k4me1.q.05_peak_1370
1	41602665	41609329	h3k4me1.q.05_peak_1371
1	41609701	41610078	h3k4me1.q.05_peak_1372
1	41616299	41616497	h3k4me1.q.05_peak_1373
1	41645721	41646090	h3k4me1.q.05_peak_1374
1	41649824	41655136	h3k4me1.q.05_peak_1375
1	41673727	41677599	h3k4me1.q.05_peak_1376
1	41711904	41713168	h3k4me1.q.05_peak_1377
1	41734588	41734877	h3k4me1.q.05_peak_1378
1	41740646	41745025	h3k4me1.q.05_peak_1379
1	41745245	41753350	h3k4me1.q.05_peak_1380
1	41807043	41817248	h3k4me1.q.05_peak_1381
1	41817563	41818182	h3k4me1.q.05_peak_1382
1	41819540	41823471	h3k4me1.q.05_peak_1383
1	41825745	41826332	h3k4me1.q.05_peak_1384
1	41887088	41893408	h3k4me1.q.05_peak_1385
1	41897528	41898564	h3k4me1.q.05_peak_1386
1	41909840	41910177	h3k4me1.q.05_peak_1387
1	41912757	41913171	h3k4me1.q.05_peak_1388
1	41915923	41920680	h3k4me1.q.05_peak_1389
1	41933638	41937660	h3k4me1.q.05_peak_1390
1	41960314	41960537	h3k4me1.q.05_peak_1391
1	41981534	41982426	h3k4me1.q.05_peak_1392
1	41996899	41997293	h3k4me1.q.05_peak_1393
1	42005849	42007633	h3k4me1.q.05_peak_1394
1	42018783	42021155	h3k4me1.q.05_peak_1395
1	42064910	42066135	h3k4me1.q.05_peak_1396
1	42082962	42083268	h3k4me1.q.05_peak_1397
1	42095914	42099694	h3k4me1.q.05_peak_1398
1	42106787	42109067	h3k4me1.q.05_peak_1399
1	42151680	42153504	h3k4me1.q.05_peak_1400
1	42228506	42234937	h3k4me1.q.05_peak_1401
1	42240593	42244971	h3k4me1.q.05_peak_1402
1	42253994	42263452	h3k4me1.q.05_peak_1403
1	42276933	42278336	h3k4me1.q.05_peak_1404
1	42295104	42295859	h3k4me1.q.05_peak_1405
1	42347260	42347519	h3k4me1.q.05_peak_1406
1	42351303	42355585	h3k4me1.q.05_peak_1407
1	42365878	42366675	h3k4me1.q.05_peak_1408
1	42387329	42388297	h3k4me1.q.05_peak_1409
1	42398233	42399350	h3k4me1.q.05_peak_1410
1	42415906	42418112	h3k4me1.q.05_peak_1411
1	42471415	42474878	h3k4me1.q.05_peak_1412
1	42480418	42482683	h3k4me1.q.05_peak_1413
1	42489335	42492574	h3k4me1.q.05_peak_1414
1	42497432	42498068	h3k4me1.q.05_peak_1415
1	42502141	42505646	h3k4me1.q.05_peak_1416
1	42523732	42525606	h3k4me1.q.05_peak_1417
1	42537470	42537746	h3k4me1.q.05_peak_1418
1	42538021	42544818	h3k4me1.q.05_peak_1419
1	42624773	42627240	h3k4me1.q.05_peak_1420
1	42628051	42631897	h3k4me1.q.05_peak_1421
1	42636958	42637943	h3k4me1.q.05_peak_1422
1	42642581	42642846	h3k4me1.q.05_peak_1423
1	42643890	42644860	h3k4me1.q.05_peak_1424
1	42648025	42653317	h3k4me1.q.05_peak_1425
1	42654762	42655507	h3k4me1.q.05_peak_1426
1	42655898	42656192	h3k4me1.q.05_peak_1427
1	42667441	42668052	h3k4me1.q.05_peak_1428
1	42674200	42674702	h3k4me1.q.05_peak_1429
1	42674927	42675350	h3k4me1.q.05_peak_1430
1	42677059	42692645	h3k4me1.q.05_peak_1431
1	42693052	42693998	h3k4me1.q.05_peak_1432
1	42699361	42699844	h3k4me1.q.05_peak_1433
1	42700176	42714370	h3k4me1.q.05_peak_1434
1	42717702	42719338	h3k4me1.q.05_peak_1435
1	42720931	42721777	h3k4me1.q.05_peak_1436
1	42727300	42728505	h3k4me1.q.05_peak_1437
1	42741587	42742138	h3k4me1.q.05_peak_1438
1	42743257	42744129	h3k4me1.q.05_peak_1439
1	42763495	42765080	h3k4me1.q.05_peak_1440
1	42771742	42772024	h3k4me1.q.05_peak_1441
1	42773974	42776291	h3k4me1.q.05_peak_1442
1	42776613	42776850	h3k4me1.q.05_peak_1443
1	42779950	42781834	h3k4me1.q.05_peak_1444
1	42782497	42783710	h3k4me1.q.05_peak_1445
1	42850933	42851250	h3k4me1.q.05_peak_1446
1	42852369	42852659	h3k4me1.q.05_peak_1447
1	42872779	42874499	h3k4me1.q.05_peak_1448
1	42876484	42877747	h3k4me1.q.05_peak_1449
1	42888186	42889965	h3k4me1.q.05_peak_1450
1	42917977	42918503	h3k4me1.q.05_peak_1451
1	42923748	42924336	h3k4me1.q.05_peak_1452
1	42945953	42947246	h3k4me1.q.05_peak_1453
1	42952582	42952832	h3k4me1.q.05_peak_1454
1	42953816	42954921	h3k4me1.q.05_peak_1455
1	43006002	43006686	h3k4me1.q.05_peak_1456
1	43045086	43046575	h3k4me1.q.05_peak_1457
1	43072142	43072723	h3k4me1.q.05_peak_1458
1	43090946	43092065	h3k4me1.q.05_peak_1459
1	43092785	43093725	h3k4me1.q.05_peak_1460
1	43097136	43098247	h3k4me1.q.05_peak_1461
1	43099172	43099976	h3k4me1.q.05_peak_1462
1	43130543	43131020	h3k4me1.q.05_peak_1463
1	43137002	43138322	h3k4me1.q.05_peak_1464
1	43140927	43143849	h3k4me1.q.05_peak_1465
1	43163208	43164162	h3k4me1.q.05_peak_1466
1	43210413	43212134	h3k4me1.q.05_peak_1467
1	43250371	43250977	h3k4me1.q.05_peak_1468
1	43305594	43305966	h3k4me1.q.05_peak_1469
1	43310743	43311614	h3k4me1.q.05_peak_1470
1	43316982	43317763	h3k4me1.q.05_peak_1471
1	43317999	43318260	h3k4me1.q.05_peak_1472
1	43349922	43350184	h3k4me1.q.05_peak_1473
1	43357905	43359178	h3k4me1.q.05_peak_1474
1	43360589	43361958	h3k4me1.q.05_peak_1475
1	43395821	43396186	h3k4me1.q.05_peak_1476
1	43426306	43427403	h3k4me1.q.05_peak_1477
1	43444646	43445659	h3k4me1.q.05_peak_1478
1	43446619	43450655	h3k4me1.q.05_peak_1479
1	43457832	43458337	h3k4me1.q.05_peak_1480
1	43458648	43460306	h3k4me1.q.05_peak_1481
1	43463623	43464919	h3k4me1.q.05_peak_1482
1	43465856	43466340	h3k4me1.q.05_peak_1483
1	43466611	43469121	h3k4me1.q.05_peak_1484
1	43470371	43470758	h3k4me1.q.05_peak_1485
1	43470987	43471706	h3k4me1.q.05_peak_1486
1	43471981	43477230	h3k4me1.q.05_peak_1487
1	43484750	43485922	h3k4me1.q.05_peak_1488
1	43488224	43489916	h3k4me1.q.05_peak_1489
1	43494901	43496382	h3k4me1.q.05_peak_1490
1	43496947	43500651	h3k4me1.q.05_peak_1491
1	43501690	43505348	h3k4me1.q.05_peak_1492
1	43522801	43524175	h3k4me1.q.05_peak_1493
1	43527531	43527744	h3k4me1.q.05_peak_1494
1	43528943	43532855	h3k4me1.q.05_peak_1495
1	43535217	43536328	h3k4me1.q.05_peak_1496
1	43538222	43539833	h3k4me1.q.05_peak_1497
1	43542248	43543109	h3k4me1.q.05_peak_1498
1	43544131	43544380	h3k4me1.q.05_peak_1499
1	43549654	43549921	h3k4me1.q.05_peak_1500
1	43550204	43550613	h3k4me1.q.05_peak_1501
1	43561920	43562619	h3k4me1.q.05_peak_1502
1	43590610	43591264	h3k4me1.q.05_peak_1503
1	43594575	43595731	h3k4me1.q.05_peak_1504
1	43615874	43616745	h3k4me1.q.05_peak_1505
1	43632747	43634369	h3k4me1.q.05_peak_1506
1	43693908	43695900	h3k4me1.q.05_peak_1507
1	43697585	43699807	h3k4me1.q.05_peak_1508
1	43729497	43731513	h3k4me1.q.05_peak_1509
1	43732431	43733170	h3k4me1.q.05_peak_1510
1	43772781	43773153	h3k4me1.q.05_peak_1511
1	43822988	43824220	h3k4me1.q.05_peak_1512
1	43824995	43827015	h3k4me1.q.05_peak_1513
1	43828107	43828866	h3k4me1.q.05_peak_1514
1	43899195	43900135	h3k4me1.q.05_peak_1515
1	43932834	43933245	h3k4me1.q.05_peak_1516
1	43934808	43937044	h3k4me1.q.05_peak_1517
1	44041794	44042750	h3k4me1.q.05_peak_1518
1	44099685	44101722	h3k4me1.q.05_peak_1519
1	44103047	44103453	h3k4me1.q.05_peak_1520
1	44117434	44118020	h3k4me1.q.05_peak_1521
1	44119771	44122030	h3k4me1.q.05_peak_1522
1	44147410	44147794	h3k4me1.q.05_peak_1523
1	44148776	44150443	h3k4me1.q.05_peak_1524
1	44198405	44198672	h3k4me1.q.05_peak_1525
1	44198954	44199387	h3k4me1.q.05_peak_1526
1	44215647	44217901	h3k4me1.q.05_peak_1527
1	44522263	44523014	h3k4me1.q.05_peak_1528
1	44551133	44554407	h3k4me1.q.05_peak_1529
1	44585092	44585646	h3k4me1.q.05_peak_1530
1	44589473	44590125	h3k4me1.q.05_peak_1531
1	44591256	44592199	h3k4me1.q.05_peak_1532
1	44626507	44626754	h3k4me1.q.05_peak_1533
1	44627038	44627492	h3k4me1.q.05_peak_1534
1	44678686	44679823	h3k4me1.q.05_peak_1535
1	44682028	44683033	h3k4me1.q.05_peak_1536
1	44808880	44809259	h3k4me1.q.05_peak_1537
1	44943150	44944618	h3k4me1.q.05_peak_1538
1	45116268	45118301	h3k4me1.q.05_peak_1539
1	45312154	45312380	h3k4me1.q.05_peak_1540
1	45313668	45314079	h3k4me1.q.05_peak_1541
1	45501029	45505056	h3k4me1.q.05_peak_1542
1	45541896	45542216	h3k4me1.q.05_peak_1543
1	45796056	45798051	h3k4me1.q.05_peak_1544
1	45837790	45838148	h3k4me1.q.05_peak_1545
1	45904940	45905530	h3k4me1.q.05_peak_1546
1	45924875	45926529	h3k4me1.q.05_peak_1547
1	46066454	46066895	h3k4me1.q.05_peak_1548
1	46278945	46279380	h3k4me1.q.05_peak_1549
1	46394082	46394724	h3k4me1.q.05_peak_1550
1	46395108	46395531	h3k4me1.q.05_peak_1551
1	46418500	46419004	h3k4me1.q.05_peak_1552
1	46419236	46419816	h3k4me1.q.05_peak_1553
1	46425155	46425743	h3k4me1.q.05_peak_1554
1	46526713	46527226	h3k4me1.q.05_peak_1555
1	46623241	46623895	h3k4me1.q.05_peak_1556
1	46733179	46735687	h3k4me1.q.05_peak_1557
1	46743976	46744823	h3k4me1.q.05_peak_1558
1	46829231	46831587	h3k4me1.q.05_peak_1559
1	46838547	46839015	h3k4me1.q.05_peak_1560
1	46844420	46846682	h3k4me1.q.05_peak_1561
1	46849532	46852614	h3k4me1.q.05_peak_1562
1	46853995	46855080	h3k4me1.q.05_peak_1563
1	46885115	46885816	h3k4me1.q.05_peak_1564
1	46886053	46886303	h3k4me1.q.05_peak_1565
1	46886680	46888567	h3k4me1.q.05_peak_1566
1	46964968	46967632	h3k4me1.q.05_peak_1567
1	47003836	47004034	h3k4me1.q.05_peak_1568
1	47018901	47021579	h3k4me1.q.05_peak_1569
1	47036894	47037574	h3k4me1.q.05_peak_1570
1	47044642	47045238	h3k4me1.q.05_peak_1571
1	47057532	47057786	h3k4me1.q.05_peak_1572
1	47093363	47099159	h3k4me1.q.05_peak_1573
1	47101847	47105483	h3k4me1.q.05_peak_1574
1	47163492	47165286	h3k4me1.q.05_peak_1575
1	47190928	47191207	h3k4me1.q.05_peak_1576
1	47277704	47280229	h3k4me1.q.05_peak_1577
1	47284794	47285072	h3k4me1.q.05_peak_1578
1	47307716	47308479	h3k4me1.q.05_peak_1579
1	47309481	47313588	h3k4me1.q.05_peak_1580
1	47315561	47316229	h3k4me1.q.05_peak_1581
1	47317403	47318048	h3k4me1.q.05_peak_1582
1	47357699	47359222	h3k4me1.q.05_peak_1583
1	47360943	47361350	h3k4me1.q.05_peak_1584
1	47362690	47363779	h3k4me1.q.05_peak_1585
1	47404934	47405511	h3k4me1.q.05_peak_1586
1	47444251	47449607	h3k4me1.q.05_peak_1587
1	47475326	47475722	h3k4me1.q.05_peak_1588
1	47491464	47492386	h3k4me1.q.05_peak_1589
1	47605272	47607958	h3k4me1.q.05_peak_1590
1	47932468	47933685	h3k4me1.q.05_peak_1591
1	47961315	47961819	h3k4me1.q.05_peak_1592
1	47962190	47963135	h3k4me1.q.05_peak_1593
1	48109313	48109863	h3k4me1.q.05_peak_1594
1	48276223	48277221	h3k4me1.q.05_peak_1595
1	48342847	48343330	h3k4me1.q.05_peak_1596
1	48411576	48411902	h3k4me1.q.05_peak_1597
1	48532598	48534189	h3k4me1.q.05_peak_1598
1	49082730	49083043	h3k4me1.q.05_peak_1599
1	49794420	49795893	h3k4me1.q.05_peak_1600
1	50086138	50086705	h3k4me1.q.05_peak_1601
1	50205251	50205825	h3k4me1.q.05_peak_1602
1	50633560	50634117	h3k4me1.q.05_peak_1603
1	50651672	50652746	h3k4me1.q.05_peak_1604
1	50769060	50770973	h3k4me1.q.05_peak_1605
1	50798084	50798793	h3k4me1.q.05_peak_1606
1	50806501	50807705	h3k4me1.q.05_peak_1607
1	50860087	50861570	h3k4me1.q.05_peak_1608
1	50897632	50899001	h3k4me1.q.05_peak_1609
1	50924817	50929973	h3k4me1.q.05_peak_1610
1	50930212	50930498	h3k4me1.q.05_peak_1611
1	50938963	50941531	h3k4me1.q.05_peak_1612
1	50948435	50948978	h3k4me1.q.05_peak_1613
1	50962564	50962910	h3k4me1.q.05_peak_1614
1	50979122	50982051	h3k4me1.q.05_peak_1615
1	51008423	51008637	h3k4me1.q.05_peak_1616
1	51029038	51030065	h3k4me1.q.05_peak_1617
1	51073956	51077350	h3k4me1.q.05_peak_1618
1	51090217	51090513	h3k4me1.q.05_peak_1619
1	51094081	51095256	h3k4me1.q.05_peak_1620
1	51124889	51127457	h3k4me1.q.05_peak_1621
1	51139196	51140074	h3k4me1.q.05_peak_1622
1	51170264	51171308	h3k4me1.q.05_peak_1623
1	51199172	51199620	h3k4me1.q.05_peak_1624
1	51211290	51212466	h3k4me1.q.05_peak_1625
1	51213101	51213655	h3k4me1.q.05_peak_1626
1	51214987	51218299	h3k4me1.q.05_peak_1627
1	51230915	51231788	h3k4me1.q.05_peak_1628
1	51241014	51242090	h3k4me1.q.05_peak_1629
1	51244146	51244689	h3k4me1.q.05_peak_1630
1	51266631	51268544	h3k4me1.q.05_peak_1631
1	51269752	51271313	h3k4me1.q.05_peak_1632
1	51271945	51274304	h3k4me1.q.05_peak_1633
1	51288556	51293113	h3k4me1.q.05_peak_1634
1	51333025	51334806	h3k4me1.q.05_peak_1635
1	51341378	51345241	h3k4me1.q.05_peak_1636
1	51348454	51350089	h3k4me1.q.05_peak_1637
1	51359599	51361877	h3k4me1.q.05_peak_1638
1	51382360	51384529	h3k4me1.q.05_peak_1639
1	51387376	51387775	h3k4me1.q.05_peak_1640
1	51401823	51402281	h3k4me1.q.05_peak_1641
1	51418577	51418900	h3k4me1.q.05_peak_1642
1	51445845	51446657	h3k4me1.q.05_peak_1643
1	51477495	51477819	h3k4me1.q.05_peak_1644
1	51478809	51479265	h3k4me1.q.05_peak_1645
1	51507684	51508571	h3k4me1.q.05_peak_1646
1	51509138	51509778	h3k4me1.q.05_peak_1647
1	51510008	51510367	h3k4me1.q.05_peak_1648
1	51512461	51513777	h3k4me1.q.05_peak_1649
1	51528371	51529014	h3k4me1.q.05_peak_1650
1	51529419	51531657	h3k4me1.q.05_peak_1651
1	51565978	51566314	h3k4me1.q.05_peak_1652
1	51579935	51580346	h3k4me1.q.05_peak_1653
1	51584689	51585182	h3k4me1.q.05_peak_1654
1	51590370	51592510	h3k4me1.q.05_peak_1655
1	51606856	51609961	h3k4me1.q.05_peak_1656
1	51615510	51619287	h3k4me1.q.05_peak_1657
1	51621763	51625193	h3k4me1.q.05_peak_1658
1	51626404	51627341	h3k4me1.q.05_peak_1659
1	51627597	51630635	h3k4me1.q.05_peak_1660
1	51633881	51634321	h3k4me1.q.05_peak_1661
1	51635797	51637287	h3k4me1.q.05_peak_1662
1	51643406	51644571	h3k4me1.q.05_peak_1663
1	51646974	51648322	h3k4me1.q.05_peak_1664
1	51648794	51651889	h3k4me1.q.05_peak_1665
1	51669924	51671928	h3k4me1.q.05_peak_1666
1	51677625	51677845	h3k4me1.q.05_peak_1667
1	51678548	51678795	h3k4me1.q.05_peak_1668
1	51687434	51688731	h3k4me1.q.05_peak_1669
1	51696557	51698521	h3k4me1.q.05_peak_1670
1	51719709	51720847	h3k4me1.q.05_peak_1671
1	51743530	51744186	h3k4me1.q.05_peak_1672
1	51751021	51751658	h3k4me1.q.05_peak_1673
1	51764982	51765606	h3k4me1.q.05_peak_1674
1	51767843	51768513	h3k4me1.q.05_peak_1675
1	51795231	51798812	h3k4me1.q.05_peak_1676
1	51803993	51805758	h3k4me1.q.05_peak_1677
1	51814797	51815831	h3k4me1.q.05_peak_1678
1	51820030	51820658	h3k4me1.q.05_peak_1679
1	51835851	51838443	h3k4me1.q.05_peak_1680
1	51843557	51843934	h3k4me1.q.05_peak_1681
1	51845814	51846265	h3k4me1.q.05_peak_1682
1	51852301	51852732	h3k4me1.q.05_peak_1683
1	51873205	51873686	h3k4me1.q.05_peak_1684
1	51877848	51878082	h3k4me1.q.05_peak_1685
1	51878788	51879117	h3k4me1.q.05_peak_1686
1	51879517	51880258	h3k4me1.q.05_peak_1687
1	51885038	51886356	h3k4me1.q.05_peak_1688
1	51887513	51888981	h3k4me1.q.05_peak_1689
1	51889346	51890198	h3k4me1.q.05_peak_1690
1	51893705	51898648	h3k4me1.q.05_peak_1691
1	51907107	51911954	h3k4me1.q.05_peak_1692
1	51912413	51915151	h3k4me1.q.05_peak_1693
1	51931497	51931978	h3k4me1.q.05_peak_1694
1	51947296	51947830	h3k4me1.q.05_peak_1695
1	51966321	51970522	h3k4me1.q.05_peak_1696
1	51976653	51977172	h3k4me1.q.05_peak_1697
1	51991065	51991319	h3k4me1.q.05_peak_1698
1	51996008	51998241	h3k4me1.q.05_peak_1699
1	52004308	52004570	h3k4me1.q.05_peak_1700
1	52008277	52009756	h3k4me1.q.05_peak_1701
1	52039118	52040985	h3k4me1.q.05_peak_1702
1	52042079	52044481	h3k4me1.q.05_peak_1703
1	52045638	52046138	h3k4me1.q.05_peak_1704
1	52051495	52051814	h3k4me1.q.05_peak_1705
1	52058988	52060038	h3k4me1.q.05_peak_1706
1	52077941	52079093	h3k4me1.q.05_peak_1707
1	52079303	52081789	h3k4me1.q.05_peak_1708
1	52088758	52089452	h3k4me1.q.05_peak_1709
1	52097359	52097665	h3k4me1.q.05_peak_1710
1	52113177	52114240	h3k4me1.q.05_peak_1711
1	52118731	52119804	h3k4me1.q.05_peak_1712
1	52120016	52120970	h3k4me1.q.05_peak_1713
1	52148373	52151457	h3k4me1.q.05_peak_1714
1	52166680	52167423	h3k4me1.q.05_peak_1715
1	52212362	52212579	h3k4me1.q.05_peak_1716
1	52224126	52226883	h3k4me1.q.05_peak_1717
1	52228250	52232079	h3k4me1.q.05_peak_1718
1	52257188	52261123	h3k4me1.q.05_peak_1719
1	52265968	52266340	h3k4me1.q.05_peak_1720
1	52269328	52269588	h3k4me1.q.05_peak_1721
1	52269801	52270764	h3k4me1.q.05_peak_1722
1	52279552	52280960	h3k4me1.q.05_peak_1723
1	52305533	52308090	h3k4me1.q.05_peak_1724
1	52311855	52312844	h3k4me1.q.05_peak_1725
1	52331406	52332459	h3k4me1.q.05_peak_1726
1	52387700	52388449	h3k4me1.q.05_peak_1727
1	52388661	52389069	h3k4me1.q.05_peak_1728
1	52453821	52454184	h3k4me1.q.05_peak_1729
1	52462523	52463640	h3k4me1.q.05_peak_1730
1	52464017	52466080	h3k4me1.q.05_peak_1731
1	52466735	52467003	h3k4me1.q.05_peak_1732
1	52470030	52472706	h3k4me1.q.05_peak_1733
1	52494923	52495411	h3k4me1.q.05_peak_1734
1	52495623	52499930	h3k4me1.q.05_peak_1735
1	52500880	52502461	h3k4me1.q.05_peak_1736
1	52519546	52519778	h3k4me1.q.05_peak_1737
1	52519980	52525171	h3k4me1.q.05_peak_1738
1	52554195	52554432	h3k4me1.q.05_peak_1739
1	52554706	52554954	h3k4me1.q.05_peak_1740
1	52577576	52579707	h3k4me1.q.05_peak_1741
1	52596132	52599511	h3k4me1.q.05_peak_1742
1	52630215	52630533	h3k4me1.q.05_peak_1743
1	52631187	52633071	h3k4me1.q.05_peak_1744
1	52648380	52648775	h3k4me1.q.05_peak_1745
1	52657263	52657756	h3k4me1.q.05_peak_1746
1	52675903	52677083	h3k4me1.q.05_peak_1747
1	52714086	52714569	h3k4me1.q.05_peak_1748
1	52725512	52726518	h3k4me1.q.05_peak_1749
1	52727512	52728153	h3k4me1.q.05_peak_1750
1	52729948	52730826	h3k4me1.q.05_peak_1751
1	52758161	52758764	h3k4me1.q.05_peak_1752
1	52799650	52800154	h3k4me1.q.05_peak_1753
1	52815982	52817726	h3k4me1.q.05_peak_1754
1	52820630	52821164	h3k4me1.q.05_peak_1755
1	52844849	52846410	h3k4me1.q.05_peak_1756
1	52951249	52953988	h3k4me1.q.05_peak_1757
1	52971883	52972327	h3k4me1.q.05_peak_1758
1	53015508	53017806	h3k4me1.q.05_peak_1759
1	53019017	53019259	h3k4me1.q.05_peak_1760
1	53020047	53020600	h3k4me1.q.05_peak_1761
1	53048996	53049300	h3k4me1.q.05_peak_1762
1	53059725	53063378	h3k4me1.q.05_peak_1763
1	53069589	53070195	h3k4me1.q.05_peak_1764
1	53225234	53225931	h3k4me1.q.05_peak_1765
1	53295438	53299303	h3k4me1.q.05_peak_1766
1	53299656	53300253	h3k4me1.q.05_peak_1767
1	53312825	53313888	h3k4me1.q.05_peak_1768
1	53314116	53315528	h3k4me1.q.05_peak_1769
1	53351369	53352841	h3k4me1.q.05_peak_1770
1	53377489	53378048	h3k4me1.q.05_peak_1771
1	53383466	53385011	h3k4me1.q.05_peak_1772
1	53385243	53385494	h3k4me1.q.05_peak_1773
1	53393862	53394877	h3k4me1.q.05_peak_1774
1	53423031	53424299	h3k4me1.q.05_peak_1775
1	53425825	53426655	h3k4me1.q.05_peak_1776
1	53629833	53630129	h3k4me1.q.05_peak_1777
1	53706173	53707332	h3k4me1.q.05_peak_1778
1	53713009	53713521	h3k4me1.q.05_peak_1779
1	53713747	53714671	h3k4me1.q.05_peak_1780
1	53715237	53715574	h3k4me1.q.05_peak_1781
1	53739556	53741935	h3k4me1.q.05_peak_1782
1	53747319	53750335	h3k4me1.q.05_peak_1783
1	53783563	53784779	h3k4me1.q.05_peak_1784
1	53813840	53814888	h3k4me1.q.05_peak_1785
1	53818489	53819017	h3k4me1.q.05_peak_1786
1	53819418	53820961	h3k4me1.q.05_peak_1787
1	53822820	53824695	h3k4me1.q.05_peak_1788
1	53828829	53829639	h3k4me1.q.05_peak_1789
1	53866156	53866725	h3k4me1.q.05_peak_1790
1	53883120	53883402	h3k4me1.q.05_peak_1791
1	53939770	53942134	h3k4me1.q.05_peak_1792
1	53944621	53944934	h3k4me1.q.05_peak_1793
1	54118677	54120558	h3k4me1.q.05_peak_1794
1	54193038	54194196	h3k4me1.q.05_peak_1795
1	54249999	54250552	h3k4me1.q.05_peak_1796
1	54250821	54251332	h3k4me1.q.05_peak_1797
1	54435405	54439281	h3k4me1.q.05_peak_1798
1	54468518	54469410	h3k4me1.q.05_peak_1799
1	54484547	54484931	h3k4me1.q.05_peak_1800
1	54521054	54523280	h3k4me1.q.05_peak_1801
1	54553743	54556724	h3k4me1.q.05_peak_1802
1	54557992	54558624	h3k4me1.q.05_peak_1803
1	54577533	54580442	h3k4me1.q.05_peak_1804
1	54584581	54586443	h3k4me1.q.05_peak_1805
1	54638950	54641657	h3k4me1.q.05_peak_1806
1	54646490	54648930	h3k4me1.q.05_peak_1807
1	54650696	54651225	h3k4me1.q.05_peak_1808
1	54664623	54666123	h3k4me1.q.05_peak_1809
1	54675855	54677602	h3k4me1.q.05_peak_1810
1	54689996	54691217	h3k4me1.q.05_peak_1811
1	54699088	54699764	h3k4me1.q.05_peak_1812
1	54701261	54701673	h3k4me1.q.05_peak_1813
1	54702238	54708989	h3k4me1.q.05_peak_1814
1	54710232	54711305	h3k4me1.q.05_peak_1815
1	54713448	54716679	h3k4me1.q.05_peak_1816
1	54717464	54717855	h3k4me1.q.05_peak_1817
1	54734720	54736443	h3k4me1.q.05_peak_1818
1	54737665	54737897	h3k4me1.q.05_peak_1819
1	54738536	54741793	h3k4me1.q.05_peak_1820
1	54742996	54743241	h3k4me1.q.05_peak_1821
1	54745618	54746090	h3k4me1.q.05_peak_1822
1	54761132	54763529	h3k4me1.q.05_peak_1823
1	54772785	54773313	h3k4me1.q.05_peak_1824
1	54789044	54790363	h3k4me1.q.05_peak_1825
1	54790606	54792252	h3k4me1.q.05_peak_1826
1	54802406	54803141	h3k4me1.q.05_peak_1827
1	54826194	54827520	h3k4me1.q.05_peak_1828
1	54829734	54830866	h3k4me1.q.05_peak_1829
1	54838032	54838889	h3k4me1.q.05_peak_1830
1	54840264	54840778	h3k4me1.q.05_peak_1831
1	54842746	54843944	h3k4me1.q.05_peak_1832
1	54844169	54844893	h3k4me1.q.05_peak_1833
1	54851172	54855010	h3k4me1.q.05_peak_1834
1	54861810	54862649	h3k4me1.q.05_peak_1835
1	54864519	54865234	h3k4me1.q.05_peak_1836
1	54866889	54868882	h3k4me1.q.05_peak_1837
1	54872991	54873634	h3k4me1.q.05_peak_1838
1	54876757	54878862	h3k4me1.q.05_peak_1839
1	54885560	54886285	h3k4me1.q.05_peak_1840
1	54896201	54900116	h3k4me1.q.05_peak_1841
1	54906412	54907438	h3k4me1.q.05_peak_1842
1	54909107	54909672	h3k4me1.q.05_peak_1843
1	54912392	54912655	h3k4me1.q.05_peak_1844
1	54922393	54923531	h3k4me1.q.05_peak_1845
1	54923927	54925752	h3k4me1.q.05_peak_1846
1	54926606	54927017	h3k4me1.q.05_peak_1847
1	54930756	54931343	h3k4me1.q.05_peak_1848
1	55025616	55025853	h3k4me1.q.05_peak_1849
1	55052064	55052612	h3k4me1.q.05_peak_1850
1	55053249	55054553	h3k4me1.q.05_peak_1851
1	55083942	55084517	h3k4me1.q.05_peak_1852
1	55084851	55087119	h3k4me1.q.05_peak_1853
1	55088886	55090694	h3k4me1.q.05_peak_1854
1	55130291	55131068	h3k4me1.q.05_peak_1855
1	55132035	55133864	h3k4me1.q.05_peak_1856
1	55145525	55145853	h3k4me1.q.05_peak_1857
1	55160040	55162363	h3k4me1.q.05_peak_1858
1	55191902	55193827	h3k4me1.q.05_peak_1859
1	55194222	55195532	h3k4me1.q.05_peak_1860
1	55198581	55198946	h3k4me1.q.05_peak_1861
1	55201760	55202796	h3k4me1.q.05_peak_1862
1	55205088	55206538	h3k4me1.q.05_peak_1863
1	55210295	55210756	h3k4me1.q.05_peak_1864
1	55221030	55222720	h3k4me1.q.05_peak_1865
1	55223754	55226722	h3k4me1.q.05_peak_1866
1	55236696	55236990	h3k4me1.q.05_peak_1867
1	55238007	55242052	h3k4me1.q.05_peak_1868
1	55383431	55383643	h3k4me1.q.05_peak_1869
1	55399860	55400547	h3k4me1.q.05_peak_1870
1	55404593	55405773	h3k4me1.q.05_peak_1871
1	55406908	55408710	h3k4me1.q.05_peak_1872
1	55417177	55417901	h3k4me1.q.05_peak_1873
1	55432227	55432837	h3k4me1.q.05_peak_1874
1	55436967	55438979	h3k4me1.q.05_peak_1875
1	55453783	55454800	h3k4me1.q.05_peak_1876
1	55488279	55490904	h3k4me1.q.05_peak_1877
1	55492088	55492402	h3k4me1.q.05_peak_1878
1	55499031	55502759	h3k4me1.q.05_peak_1879
1	55528378	55529412	h3k4me1.q.05_peak_1880
1	55558240	55560497	h3k4me1.q.05_peak_1881
1	55581310	55582479	h3k4me1.q.05_peak_1882
1	55583422	55584018	h3k4me1.q.05_peak_1883
1	55587719	55588631	h3k4me1.q.05_peak_1884
1	55623231	55624330	h3k4me1.q.05_peak_1885
1	55629426	55629807	h3k4me1.q.05_peak_1886
1	55631394	55634368	h3k4me1.q.05_peak_1887
1	55644138	55644370	h3k4me1.q.05_peak_1888
1	55650715	55652394	h3k4me1.q.05_peak_1889
1	55652606	55654246	h3k4me1.q.05_peak_1890
1	55658735	55662044	h3k4me1.q.05_peak_1891
1	55662318	55662619	h3k4me1.q.05_peak_1892
1	55664897	55669471	h3k4me1.q.05_peak_1893
1	55672113	55673034	h3k4me1.q.05_peak_1894
1	55674347	55676293	h3k4me1.q.05_peak_1895
1	55681192	55682005	h3k4me1.q.05_peak_1896
1	55688563	55688775	h3k4me1.q.05_peak_1897
1	55700288	55702818	h3k4me1.q.05_peak_1898
1	55704179	55707481	h3k4me1.q.05_peak_1899
1	55725297	55725570	h3k4me1.q.05_peak_1900
1	55738137	55739518	h3k4me1.q.05_peak_1901
1	55741353	55743893	h3k4me1.q.05_peak_1902
1	55761668	55762095	h3k4me1.q.05_peak_1903
1	55792511	55792847	h3k4me1.q.05_peak_1904
1	55848671	55848996	h3k4me1.q.05_peak_1905
1	55882763	55883806	h3k4me1.q.05_peak_1906
1	55886513	55891488	h3k4me1.q.05_peak_1907
1	55891844	55892495	h3k4me1.q.05_peak_1908
1	55893490	55893713	h3k4me1.q.05_peak_1909
1	55897352	55899979	h3k4me1.q.05_peak_1910
1	55900331	55900954	h3k4me1.q.05_peak_1911
1	55910778	55911354	h3k4me1.q.05_peak_1912
1	55912813	55917567	h3k4me1.q.05_peak_1913
1	55919830	55920268	h3k4me1.q.05_peak_1914
1	55921985	55922614	h3k4me1.q.05_peak_1915
1	55937222	55937481	h3k4me1.q.05_peak_1916
1	55943489	55944347	h3k4me1.q.05_peak_1917
1	55973446	55975116	h3k4me1.q.05_peak_1918
1	55987042	55987819	h3k4me1.q.05_peak_1919
1	56036876	56037099	h3k4me1.q.05_peak_1920
1	56130298	56132012	h3k4me1.q.05_peak_1921
1	56143809	56144962	h3k4me1.q.05_peak_1922
1	56178976	56179751	h3k4me1.q.05_peak_1923
1	56210776	56211127	h3k4me1.q.05_peak_1924
1	56211508	56212369	h3k4me1.q.05_peak_1925
1	56256680	56256919	h3k4me1.q.05_peak_1926
1	56288642	56290901	h3k4me1.q.05_peak_1927
1	56344434	56346224	h3k4me1.q.05_peak_1928
1	56395423	56395744	h3k4me1.q.05_peak_1929
1	56397203	56398621	h3k4me1.q.05_peak_1930
1	56402594	56404287	h3k4me1.q.05_peak_1931
1	56405608	56406195	h3k4me1.q.05_peak_1932
1	56437756	56438271	h3k4me1.q.05_peak_1933
1	56640798	56642035	h3k4me1.q.05_peak_1934
1	56670159	56672580	h3k4me1.q.05_peak_1935
1	56725201	56727408	h3k4me1.q.05_peak_1936
1	56732261	56733568	h3k4me1.q.05_peak_1937
1	56749437	56750780	h3k4me1.q.05_peak_1938
1	56779575	56780542	h3k4me1.q.05_peak_1939
1	56800318	56801250	h3k4me1.q.05_peak_1940
1	56817024	56817328	h3k4me1.q.05_peak_1941
1	56832480	56836177	h3k4me1.q.05_peak_1942
1	56843750	56845177	h3k4me1.q.05_peak_1943
1	56845764	56846091	h3k4me1.q.05_peak_1944
1	56860596	56860869	h3k4me1.q.05_peak_1945
1	56881642	56881969	h3k4me1.q.05_peak_1946
1	56898251	56903114	h3k4me1.q.05_peak_1947
1	56908350	56909172	h3k4me1.q.05_peak_1948
1	56917795	56917994	h3k4me1.q.05_peak_1949
1	56918702	56918968	h3k4me1.q.05_peak_1950
1	56919473	56921031	h3k4me1.q.05_peak_1951
1	56925029	56930140	h3k4me1.q.05_peak_1952
1	56930349	56930622	h3k4me1.q.05_peak_1953
1	56931009	56931522	h3k4me1.q.05_peak_1954
1	56938637	56939940	h3k4me1.q.05_peak_1955
1	56951510	56952485	h3k4me1.q.05_peak_1956
1	56963132	56963516	h3k4me1.q.05_peak_1957
1	56963869	56971652	h3k4me1.q.05_peak_1958
1	56973570	56974753	h3k4me1.q.05_peak_1959
1	56975347	56979011	h3k4me1.q.05_peak_1960
1	56980169	56981477	h3k4me1.q.05_peak_1961
1	56981731	56982591	h3k4me1.q.05_peak_1962
1	56983213	56984716	h3k4me1.q.05_peak_1963
1	57009332	57009961	h3k4me1.q.05_peak_1964
1	57010496	57011186	h3k4me1.q.05_peak_1965
1	57011561	57011851	h3k4me1.q.05_peak_1966
1	57038693	57039656	h3k4me1.q.05_peak_1967
1	57039930	57041569	h3k4me1.q.05_peak_1968
1	57058815	57059052	h3k4me1.q.05_peak_1969
1	57076548	57076992	h3k4me1.q.05_peak_1970
1	57082466	57084013	h3k4me1.q.05_peak_1971
1	57095085	57096641	h3k4me1.q.05_peak_1972
1	57157904	57158873	h3k4me1.q.05_peak_1973
1	57168650	57168957	h3k4me1.q.05_peak_1974
1	57174006	57175537	h3k4me1.q.05_peak_1975
1	57204066	57216459	h3k4me1.q.05_peak_1976
1	57216909	57220409	h3k4me1.q.05_peak_1977
1	57223701	57225907	h3k4me1.q.05_peak_1978
1	57258735	57261437	h3k4me1.q.05_peak_1979
1	57264031	57268410	h3k4me1.q.05_peak_1980
1	57288260	57288517	h3k4me1.q.05_peak_1981
1	57301071	57302663	h3k4me1.q.05_peak_1982
1	57321391	57321613	h3k4me1.q.05_peak_1983
1	57325157	57332223	h3k4me1.q.05_peak_1984
1	57332506	57334328	h3k4me1.q.05_peak_1985
1	57340201	57343993	h3k4me1.q.05_peak_1986
1	57376793	57377329	h3k4me1.q.05_peak_1987
1	57378291	57378812	h3k4me1.q.05_peak_1988
1	57379046	57379838	h3k4me1.q.05_peak_1989
1	57380194	57380411	h3k4me1.q.05_peak_1990
1	57383633	57389992	h3k4me1.q.05_peak_1991
1	57405150	57406307	h3k4me1.q.05_peak_1992
1	57407207	57409871	h3k4me1.q.05_peak_1993
1	57427916	57430608	h3k4me1.q.05_peak_1994
1	57436063	57437392	h3k4me1.q.05_peak_1995
1	57473977	57475845	h3k4me1.q.05_peak_1996
1	57477846	57480607	h3k4me1.q.05_peak_1997
1	57489133	57490059	h3k4me1.q.05_peak_1998
1	57496693	57498143	h3k4me1.q.05_peak_1999
1	57510682	57511302	h3k4me1.q.05_peak_2000
[truncated: 115,037 more rows]

## Sheet: H3K4me3_CR_E14_CTX_Peaks
1	3670136	3672716	h3k4me3.q.05_peak_1
1	4571151	4572443	h3k4me3.q.05_peak_2
1	4784612	4786678	h3k4me3.q.05_peak_3
1	4806861	4809083	h3k4me3.q.05_peak_4
1	4856843	4859560	h3k4me3.q.05_peak_5
1	5017451	5021431	h3k4me3.q.05_peak_6
1	5022673	5024072	h3k4me3.q.05_peak_7
1	5082521	5084536	h3k4me3.q.05_peak_8
1	5588334	5588870	h3k4me3.q.05_peak_9
1	5916622	5917696	h3k4me3.q.05_peak_10
1	6213349	6216692	h3k4me3.q.05_peak_11
1	6358747	6359649	h3k4me3.q.05_peak_12
1	6382606	6383575	h3k4me3.q.05_peak_13
1	6441085	6441865	h3k4me3.q.05_peak_14
1	6729431	6732054	h3k4me3.q.05_peak_15
1	6732484	6732859	h3k4me3.q.05_peak_16
1	6734007	6736200	h3k4me3.q.05_peak_17
1	6760799	6761157	h3k4me3.q.05_peak_18
1	7087761	7090785	h3k4me3.q.05_peak_19
1	7206360	7207100	h3k4me3.q.05_peak_20
1	7397068	7398817	h3k4me3.q.05_peak_21
1	8410889	8411528	h3k4me3.q.05_peak_22
1	9298091	9300889	h3k4me3.q.05_peak_23
1	9544606	9548280	h3k4me3.q.05_peak_24
1	9601211	9602784	h3k4me3.q.05_peak_25
1	9698264	9701748	h3k4me3.q.05_peak_26
1	9743094	9748902	h3k4me3.q.05_peak_27
1	9797160	9799109	h3k4me3.q.05_peak_28
1	9847895	9849061	h3k4me3.q.05_peak_29
1	9908573	9909090	h3k4me3.q.05_peak_30
1	9941929	9944765	h3k4me3.q.05_peak_31
1	9967676	9968317	h3k4me3.q.05_peak_32
1	10008664	10009532	h3k4me3.q.05_peak_33
1	10036627	10040787	h3k4me3.q.05_peak_34
1	10231122	10234096	h3k4me3.q.05_peak_35
1	10993021	10994662	h3k4me3.q.05_peak_36
1	11329556	11330004	h3k4me3.q.05_peak_37
1	11413314	11414789	h3k4me3.q.05_peak_38
1	12692558	12693869	h3k4me3.q.05_peak_39
1	12835612	12836950	h3k4me3.q.05_peak_40
1	12988731	12989006	h3k4me3.q.05_peak_41
1	12990201	12993017	h3k4me3.q.05_peak_42
1	13103685	13104253	h3k4me3.q.05_peak_43
1	13371259	13375122	h3k4me3.q.05_peak_44
1	13425802	13427139	h3k4me3.q.05_peak_45
1	13588203	13590380	h3k4me3.q.05_peak_46
1	13659560	13660932	h3k4me3.q.05_peak_47
1	14303410	14303916	h3k4me3.q.05_peak_48
1	14304488	14305004	h3k4me3.q.05_peak_49
1	14306514	14310847	h3k4me3.q.05_peak_50
1	14505094	14505397	h3k4me3.q.05_peak_51
1	14505937	14507157	h3k4me3.q.05_peak_52
1	14754998	14756559	h3k4me3.q.05_peak_53
1	14918693	14919054	h3k4me3.q.05_peak_54
1	15286195	15288475	h3k4me3.q.05_peak_55
1	15288784	15289612	h3k4me3.q.05_peak_56
1	15805193	15807400	h3k4me3.q.05_peak_57
1	15892266	15893176	h3k4me3.q.05_peak_58
1	16092680	16093572	h3k4me3.q.05_peak_59
1	16102882	16107237	h3k4me3.q.05_peak_60
1	16517866	16520723	h3k4me3.q.05_peak_61
1	16617095	16620038	h3k4me3.q.05_peak_62
1	16655523	16658092	h3k4me3.q.05_peak_63
1	16664848	16666578	h3k4me3.q.05_peak_64
1	16687981	16689508	h3k4me3.q.05_peak_65
1	17094525	17098415	h3k4me3.q.05_peak_66
1	17145286	17146475	h3k4me3.q.05_peak_67
1	17726967	17728010	h3k4me3.q.05_peak_68
1	18056985	18059175	h3k4me3.q.05_peak_69
1	19205776	19206330	h3k4me3.q.05_peak_70
1	20477607	20478638	h3k4me3.q.05_peak_71
1	20818489	20820705	h3k4me3.q.05_peak_72
1	20823954	20824388	h3k4me3.q.05_peak_73
1	20889933	20893758	h3k4me3.q.05_peak_74
1	20951020	20952332	h3k4me3.q.05_peak_75
1	21078069	21080177	h3k4me3.q.05_peak_76
1	21166404	21167061	h3k4me3.q.05_peak_77
1	21218323	21219621	h3k4me3.q.05_peak_78
1	21271468	21272328	h3k4me3.q.05_peak_79
1	21960064	21962744	h3k4me3.q.05_peak_80
1	22532824	22534267	h3k4me3.q.05_peak_81
1	22805073	22806945	h3k4me3.q.05_peak_82
1	23255590	23259044	h3k4me3.q.05_peak_83
1	23379386	23380719	h3k4me3.q.05_peak_84
1	23381199	23383871	h3k4me3.q.05_peak_85
1	23490360	23491187	h3k4me3.q.05_peak_86
1	23760959	23765631	h3k4me3.q.05_peak_87
1	23920435	23922790	h3k4me3.q.05_peak_88
1	24004495	24006020	h3k4me3.q.05_peak_89
1	24098008	24101093	h3k4me3.q.05_peak_90
1	24586189	24588161	h3k4me3.q.05_peak_91
1	24677944	24679834	h3k4me3.q.05_peak_92
1	24869670	24870208	h3k4me3.q.05_peak_93
1	25180048	25180799	h3k4me3.q.05_peak_94
1	25227294	25229542	h3k4me3.q.05_peak_95
1	25827018	25832710	h3k4me3.q.05_peak_96
1	25892590	25893137	h3k4me3.q.05_peak_97
1	30871473	30874621	h3k4me3.q.05_peak_98
1	30946559	30951070	h3k4me3.q.05_peak_99
1	32172206	32175776	h3k4me3.q.05_peak_100
1	33669006	33671122	h3k4me3.q.05_peak_101
1	33719648	33721735	h3k4me3.q.05_peak_102
1	33756372	33758275	h3k4me3.q.05_peak_103
1	33812859	33815131	h3k4me3.q.05_peak_104
1	33906378	33909121	h3k4me3.q.05_peak_105
1	34005379	34008148	h3k4me3.q.05_peak_106
1	34010716	34012566	h3k4me3.q.05_peak_107
1	34236551	34237493	h3k4me3.q.05_peak_108
1	34298963	34299481	h3k4me3.q.05_peak_109
1	34432233	34435705	h3k4me3.q.05_peak_110
1	34438571	34441131	h3k4me3.q.05_peak_111
1	34459045	34460362	h3k4me3.q.05_peak_112
1	34472583	34473313	h3k4me3.q.05_peak_113
1	34578789	34580578	h3k4me3.q.05_peak_114
1	34664886	34665362	h3k4me3.q.05_peak_115
1	34677912	34679344	h3k4me3.q.05_peak_116
1	34749686	34751479	h3k4me3.q.05_peak_117
1	34801311	34802703	h3k4me3.q.05_peak_118
1	34840461	34843731	h3k4me3.q.05_peak_119
1	34849545	34850922	h3k4me3.q.05_peak_120
1	36064777	36065597	h3k4me3.q.05_peak_121
1	36067661	36070769	h3k4me3.q.05_peak_122
1	36243143	36244641	h3k4me3.q.05_peak_123
1	36254866	36255592	h3k4me3.q.05_peak_124
1	36303250	36303677	h3k4me3.q.05_peak_125
1	36307582	36308798	h3k4me3.q.05_peak_126
1	36367403	36369619	h3k4me3.q.05_peak_127
1	36444218	36445657	h3k4me3.q.05_peak_128
1	36470702	36472942	h3k4me3.q.05_peak_129
1	36511442	36514487	h3k4me3.q.05_peak_130
1	36545829	36547543	h3k4me3.q.05_peak_131
1	36554944	36559045	h3k4me3.q.05_peak_132
1	36580491	36580947	h3k4me3.q.05_peak_133
1	36691044	36692550	h3k4me3.q.05_peak_134
1	36708575	36710489	h3k4me3.q.05_peak_135
1	36784783	36785751	h3k4me3.q.05_peak_136
1	36937552	36940770	h3k4me3.q.05_peak_137
1	37028479	37029751	h3k4me3.q.05_peak_138
1	37299532	37301345	h3k4me3.q.05_peak_139
1	37428978	37431260	h3k4me3.q.05_peak_140
1	37539983	37541805	h3k4me3.q.05_peak_141
1	37719366	37720292	h3k4me3.q.05_peak_142
1	37863907	37866165	h3k4me3.q.05_peak_143
1	37871548	37873159	h3k4me3.q.05_peak_144
1	37889524	37891599	h3k4me3.q.05_peak_145
1	37996226	37999546	h3k4me3.q.05_peak_146
1	38127652	38130676	h3k4me3.q.05_peak_147
1	38625202	38628771	h3k4me3.q.05_peak_148
1	38629174	38629589	h3k4me3.q.05_peak_149
1	38835319	38836995	h3k4me3.q.05_peak_150
1	38847886	38848438	h3k4me3.q.05_peak_151
1	38896579	38898648	h3k4me3.q.05_peak_152
1	38987127	38988867	h3k4me3.q.05_peak_153
1	39192568	39194860	h3k4me3.q.05_peak_154
1	39366973	39369858	h3k4me3.q.05_peak_155
1	39477248	39479133	h3k4me3.q.05_peak_156
1	39534955	39537330	h3k4me3.q.05_peak_157
1	39575383	39577881	h3k4me3.q.05_peak_158
1	39650013	39651287	h3k4me3.q.05_peak_159
1	39720639	39721424	h3k4me3.q.05_peak_160
1	39899807	39903730	h3k4me3.q.05_peak_161
1	39936376	39936737	h3k4me3.q.05_peak_162
1	39947609	39948238	h3k4me3.q.05_peak_163
1	40085283	40086319	h3k4me3.q.05_peak_164
1	40266620	40267106	h3k4me3.q.05_peak_165
1	40325289	40325965	h3k4me3.q.05_peak_166
1	40680275	40682168	h3k4me3.q.05_peak_167
1	40789782	40791322	h3k4me3.q.05_peak_168
1	40967632	40968489	h3k4me3.q.05_peak_169
1	41154063	41154496	h3k4me3.q.05_peak_170
1	41274885	41275945	h3k4me3.q.05_peak_171
1	41605224	41605782	h3k4me3.q.05_peak_172
1	41651973	41652731	h3k4me3.q.05_peak_173
1	41742789	41748649	h3k4me3.q.05_peak_174
1	41810591	41812150	h3k4me3.q.05_peak_175
1	41890828	41891351	h3k4me3.q.05_peak_176
1	42229816	42231843	h3k4me3.q.05_peak_177
1	42243784	42244297	h3k4me3.q.05_peak_178
1	42258023	42262724	h3k4me3.q.05_peak_179
1	42491460	42492213	h3k4me3.q.05_peak_180
1	42539083	42540961	h3k4me3.q.05_peak_181
1	42678616	42681271	h3k4me3.q.05_peak_182
1	42681623	42714609	h3k4me3.q.05_peak_183
1	42850875	42852428	h3k4me3.q.05_peak_184
1	42952491	42954479	h3k4me3.q.05_peak_185
1	43091556	43093602	h3k4me3.q.05_peak_186
1	43097503	43099985	h3k4me3.q.05_peak_187
1	43163134	43164399	h3k4me3.q.05_peak_188
1	43444911	43448017	h3k4me3.q.05_peak_189
1	43826130	43828520	h3k4me3.q.05_peak_190
1	43932807	43935722	h3k4me3.q.05_peak_191
1	44042013	44042805	h3k4me3.q.05_peak_192
1	44100432	44103549	h3k4me3.q.05_peak_193
1	44117430	44120793	h3k4me3.q.05_peak_194
1	44146854	44149377	h3k4me3.q.05_peak_195
1	44198658	44199123	h3k4me3.q.05_peak_196
1	44551320	44553888	h3k4me3.q.05_peak_197
1	45501198	45503527	h3k4me3.q.05_peak_198
1	45794714	45796690	h3k4me3.q.05_peak_199
1	45924914	45926452	h3k4me3.q.05_peak_200
1	46066355	46067465	h3k4me3.q.05_peak_201
1	46425210	46425831	h3k4me3.q.05_peak_202
1	46850090	46850386	h3k4me3.q.05_peak_203
1	46851229	46854666	h3k4me3.q.05_peak_204
1	50925023	50929248	h3k4me3.q.05_peak_205
1	51333504	51334036	h3k4me3.q.05_peak_206
1	51477371	51479453	h3k4me3.q.05_peak_207
1	51697367	51697790	h3k4me3.q.05_peak_208
1	51913706	51914099	h3k4me3.q.05_peak_209
1	51914634	51916716	h3k4me3.q.05_peak_210
1	52008608	52009349	h3k4me3.q.05_peak_211
1	52113364	52114224	h3k4me3.q.05_peak_212
1	52118742	52120542	h3k4me3.q.05_peak_213
1	52230961	52234019	h3k4me3.q.05_peak_214
1	52498229	52501478	h3k4me3.q.05_peak_215
1	52597588	52598256	h3k4me3.q.05_peak_216
1	52630329	52632152	h3k4me3.q.05_peak_217
1	52725863	52728033	h3k4me3.q.05_peak_218
1	52816379	52818075	h3k4me3.q.05_peak_219
1	52844430	52846049	h3k4me3.q.05_peak_220
1	52952150	52953568	h3k4me3.q.05_peak_221
1	53295969	53298348	h3k4me3.q.05_peak_222
1	53313003	53314748	h3k4me3.q.05_peak_223
1	53351568	53353054	h3k4me3.q.05_peak_224
1	53706297	53707209	h3k4me3.q.05_peak_225
1	53783864	53785803	h3k4me3.q.05_peak_226
1	53940385	53940783	h3k4me3.q.05_peak_227
1	54193530	54195663	h3k4me3.q.05_peak_228
1	54249998	54251353	h3k4me3.q.05_peak_229
1	54437891	54439413	h3k4me3.q.05_peak_230
1	54554423	54558573	h3k4me3.q.05_peak_231
1	54640020	54640365	h3k4me3.q.05_peak_232
1	54924788	54927063	h3k4me3.q.05_peak_233
1	55025471	55028120	h3k4me3.q.05_peak_234
1	55052041	55054064	h3k4me3.q.05_peak_235
1	55085914	55089766	h3k4me3.q.05_peak_236
1	55130665	55133457	h3k4me3.q.05_peak_237
1	55224254	55226833	h3k4me3.q.05_peak_238
1	55236482	55239419	h3k4me3.q.05_peak_239
1	55363470	55363916	h3k4me3.q.05_peak_240
1	55404621	55408335	h3k4me3.q.05_peak_241
1	55666220	55666787	h3k4me3.q.05_peak_242
1	56965725	56967215	h3k4me3.q.05_peak_243
1	56967824	56974703	h3k4me3.q.05_peak_244
1	56975667	56976528	h3k4me3.q.05_peak_245
1	56976826	56978269	h3k4me3.q.05_peak_246
1	57377189	57378724	h3k4me3.q.05_peak_247
1	57405398	57407928	h3k4me3.q.05_peak_248
1	57428672	57428980	h3k4me3.q.05_peak_249
1	57436700	57437112	h3k4me3.q.05_peak_250
1	57773991	57776821	h3k4me3.q.05_peak_251
1	57969052	57970288	h3k4me3.q.05_peak_252
1	57995385	57997635	h3k4me3.q.05_peak_253
1	58030514	58030797	h3k4me3.q.05_peak_254
1	58391613	58394523	h3k4me3.q.05_peak_255
1	58421312	58424784	h3k4me3.q.05_peak_256
1	58444398	58446862	h3k4me3.q.05_peak_257
1	58503442	58505732	h3k4me3.q.05_peak_258
1	58585119	58587825	h3k4me3.q.05_peak_259
1	58652330	58653405	h3k4me3.q.05_peak_260
1	58711005	58714341	h3k4me3.q.05_peak_261
1	58795055	58796406	h3k4me3.q.05_peak_262
1	58971308	58974796	h3k4me3.q.05_peak_263
1	59118957	59120990	h3k4me3.q.05_peak_264
1	59236240	59238499	h3k4me3.q.05_peak_265
1	59253092	59253841	h3k4me3.q.05_peak_266
1	59480698	59486759	h3k4me3.q.05_peak_267
1	59515263	59516953	h3k4me3.q.05_peak_268
1	59574435	59575158	h3k4me3.q.05_peak_269
1	59592591	59593009	h3k4me3.q.05_peak_270
1	59669197	59671750	h3k4me3.q.05_peak_271
1	59684308	59687337	h3k4me3.q.05_peak_272
1	59761798	59767630	h3k4me3.q.05_peak_273
1	59789275	59790003	h3k4me3.q.05_peak_274
1	59912181	59915086	h3k4me3.q.05_peak_275
1	60042113	60043718	h3k4me3.q.05_peak_276
1	60096376	60099618	h3k4me3.q.05_peak_277
1	60179656	60182229	h3k4me3.q.05_peak_278
1	60342548	60344458	h3k4me3.q.05_peak_279
1	60408637	60411864	h3k4me3.q.05_peak_280
1	60564550	60567719	h3k4me3.q.05_peak_281
1	60668127	60668482	h3k4me3.q.05_peak_282
1	60860886	60861395	h3k4me3.q.05_peak_283
1	61638340	61640079	h3k4me3.q.05_peak_284
1	62702589	62708697	h3k4me3.q.05_peak_285
1	62795592	62796139	h3k4me3.q.05_peak_286
1	63112213	63116221	h3k4me3.q.05_peak_287
1	63129691	63130300	h3k4me3.q.05_peak_288
1	63175552	63178000	h3k4me3.q.05_peak_289
1	63246942	63248637	h3k4me3.q.05_peak_290
1	63272277	63274948	h3k4me3.q.05_peak_291
1	63445375	63447122	h3k4me3.q.05_peak_292
1	63540075	63540464	h3k4me3.q.05_peak_293
1	63668108	63668947	h3k4me3.q.05_peak_294
1	63729936	63731532	h3k4me3.q.05_peak_295
1	64116334	64122806	h3k4me3.q.05_peak_296
1	64531573	64535573	h3k4me3.q.05_peak_297
1	64616042	64618394	h3k4me3.q.05_peak_298
1	64689745	64692888	h3k4me3.q.05_peak_299
1	64735930	64738885	h3k4me3.q.05_peak_300
1	64955718	64957365	h3k4me3.q.05_peak_301
1	65177415	65180242	h3k4me3.q.05_peak_302
1	65185574	65188232	h3k4me3.q.05_peak_303
1	65311338	65312277	h3k4me3.q.05_peak_304
1	66174809	66178324	h3k4me3.q.05_peak_305
1	66320737	66325419	h3k4me3.q.05_peak_306
1	66386562	66388923	h3k4me3.q.05_peak_307
1	66467520	66469011	h3k4me3.q.05_peak_308
1	66700329	66702513	h3k4me3.q.05_peak_309
1	66815580	66818723	h3k4me3.q.05_peak_310
1	66862251	66864152	h3k4me3.q.05_peak_311
1	67037902	67039702	h3k4me3.q.05_peak_312
1	69104603	69108858	h3k4me3.q.05_peak_313
1	69241995	69242294	h3k4me3.q.05_peak_314
1	69684832	69689192	h3k4me3.q.05_peak_315
1	69790480	69791043	h3k4me3.q.05_peak_316
1	69826728	69827553	h3k4me3.q.05_peak_317
1	71101432	71103687	h3k4me3.q.05_peak_318
1	71556333	71558249	h3k4me3.q.05_peak_319
1	71651353	71654438	h3k4me3.q.05_peak_320
1	72211272	72212818	h3k4me3.q.05_peak_321
1	72225613	72226718	h3k4me3.q.05_peak_322
1	72236216	72237863	h3k4me3.q.05_peak_323
1	72243475	72244916	h3k4me3.q.05_peak_324
1	72254264	72256285	h3k4me3.q.05_peak_325
1	72283552	72285344	h3k4me3.q.05_peak_326
1	72306693	72308603	h3k4me3.q.05_peak_327
1	72532791	72534627	h3k4me3.q.05_peak_328
1	72535142	72537614	h3k4me3.q.05_peak_329
1	72577902	72578994	h3k4me3.q.05_peak_330
1	72582501	72584496	h3k4me3.q.05_peak_331
1	72640732	72641551	h3k4me3.q.05_peak_332
1	72710784	72712851	h3k4me3.q.05_peak_333
1	72823729	72828151	h3k4me3.q.05_peak_334
1	72869804	72875502	h3k4me3.q.05_peak_335
1	74067484	74068949	h3k4me3.q.05_peak_336
1	74097767	74099963	h3k4me3.q.05_peak_337
1	74103394	74104104	h3k4me3.q.05_peak_338
1	74123592	74125281	h3k4me3.q.05_peak_339
1	74235780	74238101	h3k4me3.q.05_peak_340
1	74283769	74286004	h3k4me3.q.05_peak_341
1	74303522	74304613	h3k4me3.q.05_peak_342
1	74332006	74333651	h3k4me3.q.05_peak_343
1	74386532	74387510	h3k4me3.q.05_peak_344
1	74390502	74393338	h3k4me3.q.05_peak_345
1	74397183	74398362	h3k4me3.q.05_peak_346
1	74504578	74507595	h3k4me3.q.05_peak_347
1	74542548	74542983	h3k4me3.q.05_peak_348
1	74586826	74588946	h3k4me3.q.05_peak_349
1	74600565	74602173	h3k4me3.q.05_peak_350
1	74661335	74663663	h3k4me3.q.05_peak_351
1	74713092	74714094	h3k4me3.q.05_peak_352
1	74771379	74772397	h3k4me3.q.05_peak_353
1	74784077	74784635	h3k4me3.q.05_peak_354
1	74803186	74803741	h3k4me3.q.05_peak_355
1	74816616	74817867	h3k4me3.q.05_peak_356
1	74854574	74856455	h3k4me3.q.05_peak_357
1	74857510	74858858	h3k4me3.q.05_peak_358
1	74950842	74951252	h3k4me3.q.05_peak_359
1	75124430	75125656	h3k4me3.q.05_peak_360
1	75140669	75143875	h3k4me3.q.05_peak_361
1	75167924	75169408	h3k4me3.q.05_peak_362
1	75179453	75180791	h3k4me3.q.05_peak_363
1	75190830	75193315	h3k4me3.q.05_peak_364
1	75208867	75211893	h3k4me3.q.05_peak_365
1	75217825	75220029	h3k4me3.q.05_peak_366
1	75235905	75237499	h3k4me3.q.05_peak_367
1	75263221	75263881	h3k4me3.q.05_peak_368
1	75316360	75318251	h3k4me3.q.05_peak_369
1	75381524	75383370	h3k4me3.q.05_peak_370
1	75435902	75436709	h3k4me3.q.05_peak_371
1	75458659	75458988	h3k4me3.q.05_peak_372
1	75477283	75480810	h3k4me3.q.05_peak_373
1	75487394	75488269	h3k4me3.q.05_peak_374
1	75504684	75506839	h3k4me3.q.05_peak_375
1	75520867	75522353	h3k4me3.q.05_peak_376
1	75546014	75547392	h3k4me3.q.05_peak_377
1	75653859	75654164	h3k4me3.q.05_peak_378
1	75705006	75705450	h3k4me3.q.05_peak_379
1	77101633	77102286	h3k4me3.q.05_peak_380
1	77102648	77103050	h3k4me3.q.05_peak_381
1	77496516	77497409	h3k4me3.q.05_peak_382
1	77501576	77517474	h3k4me3.q.05_peak_383
1	77532343	77532975	h3k4me3.q.05_peak_384
1	78189375	78189746	h3k4me3.q.05_peak_385
1	78203513	78204090	h3k4me3.q.05_peak_386
1	78216785	78217668	h3k4me3.q.05_peak_387
1	78310011	78311435	h3k4me3.q.05_peak_388
1	78488034	78489894	h3k4me3.q.05_peak_389
1	78657184	78660182	h3k4me3.q.05_peak_390
1	79450098	79451160	h3k4me3.q.05_peak_391
1	79580709	79581860	h3k4me3.q.05_peak_392
1	79671391	79672552	h3k4me3.q.05_peak_393
1	79760632	79762468	h3k4me3.q.05_peak_394
1	79775771	79777526	h3k4me3.q.05_peak_395
1	79857817	79859606	h3k4me3.q.05_peak_396
1	80338151	80341606	h3k4me3.q.05_peak_397
1	80757228	80759125	h3k4me3.q.05_peak_398
1	81076327	81080066	h3k4me3.q.05_peak_399
1	81593131	81595198	h3k4me3.q.05_peak_400
1	82282345	82293282	h3k4me3.q.05_peak_401
1	82315867	82317413	h3k4me3.q.05_peak_402
1	82586864	82587163	h3k4me3.q.05_peak_403
1	82724280	82726184	h3k4me3.q.05_peak_404
1	82838792	82841412	h3k4me3.q.05_peak_405
1	83037978	83038802	h3k4me3.q.05_peak_406
1	83159762	83160089	h3k4me3.q.05_peak_407
1	83407723	83408463	h3k4me3.q.05_peak_408
1	84283293	84285181	h3k4me3.q.05_peak_409
1	84693774	84696498	h3k4me3.q.05_peak_410
1	84709359	84710687	h3k4me3.q.05_peak_411
1	84837099	84841534	h3k4me3.q.05_peak_412
1	84890025	84890313	h3k4me3.q.05_peak_413
1	84933600	84935903	h3k4me3.q.05_peak_414
1	85703358	85703672	h3k4me3.q.05_peak_415
1	85793104	85795641	h3k4me3.q.05_peak_416
1	85894163	85897775	h3k4me3.q.05_peak_417
1	85898462	85898986	h3k4me3.q.05_peak_418
1	86018242	86019134	h3k4me3.q.05_peak_419
1	86045630	86047783	h3k4me3.q.05_peak_420
1	86059077	86059553	h3k4me3.q.05_peak_421
1	86064200	86065948	h3k4me3.q.05_peak_422
1	86153873	86155580	h3k4me3.q.05_peak_423
1	86302924	86304142	h3k4me3.q.05_peak_424
1	86357831	86361155	h3k4me3.q.05_peak_425
1	86433854	86435549	h3k4me3.q.05_peak_426
1	86440415	86443742	h3k4me3.q.05_peak_427
1	86486865	86488973	h3k4me3.q.05_peak_428
1	86501852	86505756	h3k4me3.q.05_peak_429
1	86524633	86530049	h3k4me3.q.05_peak_430
1	86530664	86531181	h3k4me3.q.05_peak_431
1	86531912	86532758	h3k4me3.q.05_peak_432
1	86581512	86583694	h3k4me3.q.05_peak_433
1	86586669	86587884	h3k4me3.q.05_peak_434
1	86669385	86671066	h3k4me3.q.05_peak_435
1	86703173	86704977	h3k4me3.q.05_peak_436
1	87155673	87156084	h3k4me3.q.05_peak_437
1	87186446	87187204	h3k4me3.q.05_peak_438
1	87213000	87215385	h3k4me3.q.05_peak_439
1	87263680	87265525	h3k4me3.q.05_peak_440
1	87326560	87328746	h3k4me3.q.05_peak_441
1	87475447	87475753	h3k4me3.q.05_peak_442
1	87509355	87510810	h3k4me3.q.05_peak_443
1	87755253	87757210	h3k4me3.q.05_peak_444
1	87852916	87855071	h3k4me3.q.05_peak_445
1	88007457	88009018	h3k4me3.q.05_peak_446
1	88205340	88206079	h3k4me3.q.05_peak_447
1	88275930	88278117	h3k4me3.q.05_peak_448
1	88698278	88702797	h3k4me3.q.05_peak_449
1	89069623	89073129	h3k4me3.q.05_peak_450
1	89453816	89456869	h3k4me3.q.05_peak_451
1	89580058	89582353	h3k4me3.q.05_peak_452
1	89849764	89850146	h3k4me3.q.05_peak_453
1	89967965	89969079	h3k4me3.q.05_peak_454
1	90203409	90207544	h3k4me3.q.05_peak_455
1	90207865	90208826	h3k4me3.q.05_peak_456
1	90221959	90222595	h3k4me3.q.05_peak_457
1	90602614	90604372	h3k4me3.q.05_peak_458
1	90743995	90744650	h3k4me3.q.05_peak_459
1	90998251	90999925	h3k4me3.q.05_peak_460
1	91052507	91053970	h3k4me3.q.05_peak_461
1	91249484	91252113	h3k4me3.q.05_peak_462
1	91297731	91299261	h3k4me3.q.05_peak_463
1	91366429	91366798	h3k4me3.q.05_peak_464
1	91397383	91399576	h3k4me3.q.05_peak_465
1	91411469	91414859	h3k4me3.q.05_peak_466
1	91457923	91460302	h3k4me3.q.05_peak_467
1	91494230	91495751	h3k4me3.q.05_peak_468
1	91539718	91541567	h3k4me3.q.05_peak_469
1	92178074	92181518	h3k4me3.q.05_peak_470
1	92472761	92474540	h3k4me3.q.05_peak_471
1	92640866	92642645	h3k4me3.q.05_peak_472
1	92737720	92738538	h3k4me3.q.05_peak_473
1	92791031	92791466	h3k4me3.q.05_peak_474
1	92830657	92835033	h3k4me3.q.05_peak_475
1	92837964	92838257	h3k4me3.q.05_peak_476
1	92848239	92849560	h3k4me3.q.05_peak_477
1	92906580	92908016	h3k4me3.q.05_peak_478
1	92909957	92912459	h3k4me3.q.05_peak_479
1	92933653	92936363	h3k4me3.q.05_peak_480
1	93099844	93102462	h3k4me3.q.05_peak_481
1	93115102	93115930	h3k4me3.q.05_peak_482
1	93176155	93177049	h3k4me3.q.05_peak_483
1	93235421	93236758	h3k4me3.q.05_peak_484
1	93304732	93306540	h3k4me3.q.05_peak_485
1	93341723	93344923	h3k4me3.q.05_peak_486
1	93444247	93446117	h3k4me3.q.05_peak_487
1	93477497	93480770	h3k4me3.q.05_peak_488
1	93511377	93513039	h3k4me3.q.05_peak_489
1	93634118	93636556	h3k4me3.q.05_peak_490
1	93668727	93669533	h3k4me3.q.05_peak_491
1	93685151	93687772	h3k4me3.q.05_peak_492
1	93753202	93756060	h3k4me3.q.05_peak_493
1	93800935	93802732	h3k4me3.q.05_peak_494
1	93803156	93804896	h3k4me3.q.05_peak_495
1	93824613	93826185	h3k4me3.q.05_peak_496
1	94035131	94035847	h3k4me3.q.05_peak_497
1	95313192	95314835	h3k4me3.q.05_peak_498
1	95664525	95669108	h3k4me3.q.05_peak_499
1	96871348	96872603	h3k4me3.q.05_peak_500
1	97658430	97662801	h3k4me3.q.05_peak_501
1	97768186	97771403	h3k4me3.q.05_peak_502
1	97974881	97978324	h3k4me3.q.05_peak_503
1	98093492	98096253	h3k4me3.q.05_peak_504
1	99772172	99773269	h3k4me3.q.05_peak_505
1	104768053	104770252	h3k4me3.q.05_peak_506
1	104993848	104994443	h3k4me3.q.05_peak_507
1	105354511	105357599	h3k4me3.q.05_peak_508
1	105662689	105665594	h3k4me3.q.05_peak_509
1	105780310	105781336	h3k4me3.q.05_peak_510
1	105843207	105844806	h3k4me3.q.05_peak_511
1	105989389	105994641	h3k4me3.q.05_peak_512
1	106171203	106177657	h3k4me3.q.05_peak_513
1	106199502	106200158	h3k4me3.q.05_peak_514
1	106710845	106715158	h3k4me3.q.05_peak_515
1	106758562	106760597	h3k4me3.q.05_peak_516
1	106795138	106797162	h3k4me3.q.05_peak_517
1	109981839	109985745	h3k4me3.q.05_peak_518
1	111863552	111865399	h3k4me3.q.05_peak_519
1	112416280	112417133	h3k4me3.q.05_peak_520
1	115684535	115685135	h3k4me3.q.05_peak_521
1	118309868	118311942	h3k4me3.q.05_peak_522
1	118321433	118322921	h3k4me3.q.05_peak_523
1	118387413	118391255	h3k4me3.q.05_peak_524
1	118458535	118459996	h3k4me3.q.05_peak_525
1	118627573	118628666	h3k4me3.q.05_peak_526
1	118913203	118913494	h3k4me3.q.05_peak_527
1	118981588	118982421	h3k4me3.q.05_peak_528
1	119047513	119054893	h3k4me3.q.05_peak_529
1	119418668	119423536	h3k4me3.q.05_peak_530
1	119503027	119505381	h3k4me3.q.05_peak_531
1	119525073	119526730	h3k4me3.q.05_peak_532
1	119647430	119649476	h3k4me3.q.05_peak_533
1	119834084	119838312	h3k4me3.q.05_peak_534
1	119911236	119913750	h3k4me3.q.05_peak_535
1	119997006	119997475	h3k4me3.q.05_peak_536
1	120006924	120007841	h3k4me3.q.05_peak_537
1	120073174	120073859	h3k4me3.q.05_peak_538
1	120116029	120116424	h3k4me3.q.05_peak_539
1	120117144	120121994	h3k4me3.q.05_peak_540
1	120264877	120265733	h3k4me3.q.05_peak_541
1	120340596	120341280	h3k4me3.q.05_peak_542
1	120602497	120602792	h3k4me3.q.05_peak_543
1	121326336	121329002	h3k4me3.q.05_peak_544
1	121390626	121390919	h3k4me3.q.05_peak_545
1	121430481	121432212	h3k4me3.q.05_peak_546
1	121527890	121528636	h3k4me3.q.05_peak_547
1	121566545	121568306	h3k4me3.q.05_peak_548
1	124044120	124046403	h3k4me3.q.05_peak_549
1	125433498	125436582	h3k4me3.q.05_peak_550
1	125559817	125562075	h3k4me3.q.05_peak_551
1	125910780	125913099	h3k4me3.q.05_peak_552
1	126490161	126493574	h3k4me3.q.05_peak_553
1	126736563	126738637	h3k4me3.q.05_peak_554
1	126828935	126831102	h3k4me3.q.05_peak_555
1	127204577	127207433	h3k4me3.q.05_peak_556
1	127537168	127537569	h3k4me3.q.05_peak_557
1	127675951	127678734	h3k4me3.q.05_peak_558
1	127772817	127776470	h3k4me3.q.05_peak_559
1	127868477	127870068	h3k4me3.q.05_peak_560
1	128101494	128104912	h3k4me3.q.05_peak_561
1	128243497	128246032	h3k4me3.q.05_peak_562
1	128357154	128360029	h3k4me3.q.05_peak_563
1	128415982	128417664	h3k4me3.q.05_peak_564
1	128472199	128472837	h3k4me3.q.05_peak_565
1	128589657	128593762	h3k4me3.q.05_peak_566
1	128595108	128596016	h3k4me3.q.05_peak_567
1	129273098	129274424	h3k4me3.q.05_peak_568
1	130299964	130300367	h3k4me3.q.05_peak_569
1	130462096	130463281	h3k4me3.q.05_peak_570
1	130715192	130718682	h3k4me3.q.05_peak_571
1	130878121	130878708	h3k4me3.q.05_peak_572
1	131095457	131098400	h3k4me3.q.05_peak_573
1	131134924	131135709	h3k4me3.q.05_peak_574
1	131136373	131139349	h3k4me3.q.05_peak_575
1	131152608	131154220	h3k4me3.q.05_peak_576
1	131244591	131246318	h3k4me3.q.05_peak_577
1	131522543	131530339	h3k4me3.q.05_peak_578
1	131657825	131658159	h3k4me3.q.05_peak_579
1	131826752	131829734	h3k4me3.q.05_peak_580
1	131867171	131868248	h3k4me3.q.05_peak_581
1	131909696	131912361	h3k4me3.q.05_peak_582
1	131962472	131964167	h3k4me3.q.05_peak_583
1	132007029	132009423	h3k4me3.q.05_peak_584
1	132067472	132068159	h3k4me3.q.05_peak_585
1	132139265	132139793	h3k4me3.q.05_peak_586
1	132189620	132193357	h3k4me3.q.05_peak_587
1	132199932	132202242	h3k4me3.q.05_peak_588
1	132298275	132299759	h3k4me3.q.05_peak_589
1	132315653	132319601	h3k4me3.q.05_peak_590
1	132389108	132392656	h3k4me3.q.05_peak_591
1	132416993	132419490	h3k4me3.q.05_peak_592
1	132476137	132478477	h3k4me3.q.05_peak_593
1	132538419	132543463	h3k4me3.q.05_peak_594
1	132738869	132742229	h3k4me3.q.05_peak_595
1	132758839	132759131	h3k4me3.q.05_peak_596
1	132880020	132882334	h3k4me3.q.05_peak_597
1	133024213	133026205	h3k4me3.q.05_peak_598
1	133032921	133034350	h3k4me3.q.05_peak_599
1	133045130	133049142	h3k4me3.q.05_peak_600
1	133130399	133135372	h3k4me3.q.05_peak_601
1	133163722	133165357	h3k4me3.q.05_peak_602
1	133180919	133184301	h3k4me3.q.05_peak_603
1	133363242	133364413	h3k4me3.q.05_peak_604
1	133418171	133418729	h3k4me3.q.05_peak_605
1	133421999	133424525	h3k4me3.q.05_peak_606
1	133434301	133434843	h3k4me3.q.05_peak_607
1	133491935	133493616	h3k4me3.q.05_peak_608
1	133608967	133610669	h3k4me3.q.05_peak_609
1	133660084	133661864	h3k4me3.q.05_peak_610
1	133735589	133736502	h3k4me3.q.05_peak_611
1	133799834	133801439	h3k4me3.q.05_peak_612
1	133854732	133855507	h3k4me3.q.05_peak_613
1	133908152	133909383	h3k4me3.q.05_peak_614
1	134045914	134046413	h3k4me3.q.05_peak_615
1	134060471	134061681	h3k4me3.q.05_peak_616
1	134061975	134062552	h3k4me3.q.05_peak_617
1	134062882	134064075	h3k4me3.q.05_peak_618
1	134074892	134079692	h3k4me3.q.05_peak_619
1	134092863	134094027	h3k4me3.q.05_peak_620
1	134098873	134099855	h3k4me3.q.05_peak_621
1	134233976	134236015	h3k4me3.q.05_peak_622
1	134298594	134299671	h3k4me3.q.05_peak_623
1	134343609	134345077	h3k4me3.q.05_peak_624
1	134360571	134362910	h3k4me3.q.05_peak_625
1	134405260	134406906	h3k4me3.q.05_peak_626
1	134414777	134416648	h3k4me3.q.05_peak_627
1	134454592	134456683	h3k4me3.q.05_peak_628
1	134493857	134495434	h3k4me3.q.05_peak_629
1	134513349	134513801	h3k4me3.q.05_peak_630
1	134555804	134557430	h3k4me3.q.05_peak_631
1	134559712	134563573	h3k4me3.q.05_peak_632
1	134646411	134646885	h3k4me3.q.05_peak_633
1	134708395	134710213	h3k4me3.q.05_peak_634
1	134954729	134956300	h3k4me3.q.05_peak_635
1	134961994	134963765	h3k4me3.q.05_peak_636
1	134987691	134988227	h3k4me3.q.05_peak_637
1	135145744	135149250	h3k4me3.q.05_peak_638
1	135154415	135154834	h3k4me3.q.05_peak_639
1	135248553	135248861	h3k4me3.q.05_peak_640
1	135258649	135259123	h3k4me3.q.05_peak_641
1	135282609	135284725	h3k4me3.q.05_peak_642
1	135312453	135314404	h3k4me3.q.05_peak_643
1	135368427	135369050	h3k4me3.q.05_peak_644
1	135372484	135375717	h3k4me3.q.05_peak_645
1	135427960	135431329	h3k4me3.q.05_peak_646
1	135509607	135510991	h3k4me3.q.05_peak_647
1	135581218	135581599	h3k4me3.q.05_peak_648
1	135581995	135586123	h3k4me3.q.05_peak_649
1	135686416	135688698	h3k4me3.q.05_peak_650
1	135699204	135699499	h3k4me3.q.05_peak_651
1	135728713	135729723	h3k4me3.q.05_peak_652
1	135765745	135767829	h3k4me3.q.05_peak_653
1	135818616	135819229	h3k4me3.q.05_peak_654
1	136007465	136008079	h3k4me3.q.05_peak_655
1	136017485	136019471	h3k4me3.q.05_peak_656
1	136051134	136051624	h3k4me3.q.05_peak_657
1	136130311	136135704	h3k4me3.q.05_peak_658
1	136139819	136140883	h3k4me3.q.05_peak_659
1	136231336	136235027	h3k4me3.q.05_peak_660
1	136259782	136261043	h3k4me3.q.05_peak_661
1	136342960	136346804	h3k4me3.q.05_peak_662
1	136414870	136416206	h3k4me3.q.05_peak_663
1	136465956	136467348	h3k4me3.q.05_peak_664
1	136570241	136570545	h3k4me3.q.05_peak_665
1	136623994	136626388	h3k4me3.q.05_peak_666
1	136628467	136629024	h3k4me3.q.05_peak_667
1	136781545	136782524	h3k4me3.q.05_peak_668
1	136948561	136949308	h3k4me3.q.05_peak_669
1	137221210	137222277	h3k4me3.q.05_peak_670
1	137897915	137904072	h3k4me3.q.05_peak_671
1	137904611	137905022	h3k4me3.q.05_peak_672
1	138136163	138136850	h3k4me3.q.05_peak_673
1	138346075	138346539	h3k4me3.q.05_peak_674
1	138500073	138500594	h3k4me3.q.05_peak_675
1	138617410	138620722	h3k4me3.q.05_peak_676
1	138837989	138844652	h3k4me3.q.05_peak_677
1	138845662	138849264	h3k4me3.q.05_peak_678
1	138856537	138857145	h3k4me3.q.05_peak_679
1	138962700	138965145	h3k4me3.q.05_peak_680
1	139080086	139080538	h3k4me3.q.05_peak_681
1	139091865	139092526	h3k4me3.q.05_peak_682
1	139376111	139377072	h3k4me3.q.05_peak_683
1	139421559	139426931	h3k4me3.q.05_peak_684
1	139454036	139456919	h3k4me3.q.05_peak_685
1	140245201	140247432	h3k4me3.q.05_peak_686
1	143640132	143644386	h3k4me3.q.05_peak_687
1	143700439	143703786	h3k4me3.q.05_peak_688
1	143738610	143740767	h3k4me3.q.05_peak_689
1	143742014	143742429	h3k4me3.q.05_peak_690
1	143775279	143778584	h3k4me3.q.05_peak_691
1	144002804	144005279	h3k4me3.q.05_peak_692
1	144006582	144006920	h3k4me3.q.05_peak_693
1	146494044	146495771	h3k4me3.q.05_peak_694
1	146497287	146498875	h3k4me3.q.05_peak_695
1	146724774	146725191	h3k4me3.q.05_peak_696
1	146805185	146805976	h3k4me3.q.05_peak_697
1	147187739	147188537	h3k4me3.q.05_peak_698
1	150099099	150100592	h3k4me3.q.05_peak_699
1	150391815	150394894	h3k4me3.q.05_peak_700
1	150991813	150993750	h3k4me3.q.05_peak_701
1	151343007	151347456	h3k4me3.q.05_peak_702
1	151427141	151430275	h3k4me3.q.05_peak_703
1	151498866	151501789	h3k4me3.q.05_peak_704
1	151571488	151572062	h3k4me3.q.05_peak_705
1	151754511	151756701	h3k4me3.q.05_peak_706
1	152088099	152091928	h3k4me3.q.05_peak_707
1	152385491	152386925	h3k4me3.q.05_peak_708
1	152399560	152401559	h3k4me3.q.05_peak_709
1	152556428	152556709	h3k4me3.q.05_peak_710
1	152623617	152625713	h3k4me3.q.05_peak_711
1	152765331	152768645	h3k4me3.q.05_peak_712
1	152900847	152904914	h3k4me3.q.05_peak_713
1	152954639	152956688	h3k4me3.q.05_peak_714
1	153330387	153333788	h3k4me3.q.05_peak_715
1	153424257	153425573	h3k4me3.q.05_peak_716
1	153484774	153487865	h3k4me3.q.05_peak_717
1	153549134	153549858	h3k4me3.q.05_peak_718
1	153641685	153642301	h3k4me3.q.05_peak_719
1	153653015	153654023	h3k4me3.q.05_peak_720
1	153661613	153662157	h3k4me3.q.05_peak_721
1	153739701	153742215	h3k4me3.q.05_peak_722
1	153749219	153750414	h3k4me3.q.05_peak_723
1	153899137	153902276	h3k4me3.q.05_peak_724
1	154205023	154205394	h3k4me3.q.05_peak_725
1	154723171	154724207	h3k4me3.q.05_peak_726
1	154725670	154727266	h3k4me3.q.05_peak_727
1	154882413	154884934	h3k4me3.q.05_peak_728
1	155082709	155084990	h3k4me3.q.05_peak_729
1	155095922	155099804	h3k4me3.q.05_peak_730
1	155158384	155160081	h3k4me3.q.05_peak_731
1	155243629	155245207	h3k4me3.q.05_peak_732
1	155414077	155417535	h3k4me3.q.05_peak_733
1	155491210	155491528	h3k4me3.q.05_peak_734
1	155528850	155529304	h3k4me3.q.05_peak_735
1	155557676	155559793	h3k4me3.q.05_peak_736
1	155740922	155743360	h3k4me3.q.05_peak_737
1	155811383	155813522	h3k4me3.q.05_peak_738
1	155971628	155974488	h3k4me3.q.05_peak_739
1	156034512	156037101	h3k4me3.q.05_peak_740
1	156040558	156042449	h3k4me3.q.05_peak_741
1	156042754	156043142	h3k4me3.q.05_peak_742
1	156203872	156205330	h3k4me3.q.05_peak_743
1	156302835	156304027	h3k4me3.q.05_peak_744
1	156420355	156421620	h3k4me3.q.05_peak_745
1	156472773	156474615	h3k4me3.q.05_peak_746
1	156558274	156560512	h3k4me3.q.05_peak_747
1	156673054	156675053	h3k4me3.q.05_peak_748
1	156717757	156719720	h3k4me3.q.05_peak_749
1	156937092	156940841	h3k4me3.q.05_peak_750
1	157039787	157040428	h3k4me3.q.05_peak_751
1	157086294	157087100	h3k4me3.q.05_peak_752
1	157242069	157244809	h3k4me3.q.05_peak_753
1	157410170	157413981	h3k4me3.q.05_peak_754
1	157458314	157459079	h3k4me3.q.05_peak_755
1	158353293	158357028	h3k4me3.q.05_peak_756
1	158361888	158365097	h3k4me3.q.05_peak_757
1	158960477	158961947	h3k4me3.q.05_peak_758
1	159231310	159235048	h3k4me3.q.05_peak_759
1	159523766	159524617	h3k4me3.q.05_peak_760
1	160044247	160044914	h3k4me3.q.05_peak_761
1	160194342	160196253	h3k4me3.q.05_peak_762
1	160210463	160214155	h3k4me3.q.05_peak_763
1	160349130	160352612	h3k4me3.q.05_peak_764
1	160791398	160793614	h3k4me3.q.05_peak_765
1	160905723	160909371	h3k4me3.q.05_peak_766
1	161033486	161038419	h3k4me3.q.05_peak_767
1	161069514	161073513	h3k4me3.q.05_peak_768
1	161130116	161131941	h3k4me3.q.05_peak_769
1	161142403	161143465	h3k4me3.q.05_peak_770
1	161150176	161151263	h3k4me3.q.05_peak_771
1	161170554	161171136	h3k4me3.q.05_peak_772
1	161194993	161196332	h3k4me3.q.05_peak_773
1	161248519	161251953	h3k4me3.q.05_peak_774
1	161874412	161878098	h3k4me3.q.05_peak_775
1	161968455	161970267	h3k4me3.q.05_peak_776
1	162475817	162478114	h3k4me3.q.05_peak_777
1	162547212	162549389	h3k4me3.q.05_peak_778
1	162569568	162572297	h3k4me3.q.05_peak_779
1	162738264	162741259	h3k4me3.q.05_peak_780
1	163308557	163309026	h3k4me3.q.05_peak_781
1	163309799	163315159	h3k4me3.q.05_peak_782
1	163402573	163404427	h3k4me3.q.05_peak_783
1	163779477	163780972	h3k4me3.q.05_peak_784
1	163929157	163931166	h3k4me3.q.05_peak_785
1	163993657	163995772	h3k4me3.q.05_peak_786
1	164184330	164184681	h3k4me3.q.05_peak_787
1	164247814	164250709	h3k4me3.q.05_peak_788
1	164275268	164276703	h3k4me3.q.05_peak_789
1	164306308	164308411	h3k4me3.q.05_peak_790
1	164454891	164455392	h3k4me3.q.05_peak_791
1	164455906	164459221	h3k4me3.q.05_peak_792
1	164898830	164899591	h3k4me3.q.05_peak_793
1	165018874	165019330	h3k4me3.q.05_peak_794
1	165091644	165092231	h3k4me3.q.05_peak_795
1	165193293	165195318	h3k4me3.q.05_peak_796
1	165235572	165237818	h3k4me3.q.05_peak_797
1	165280783	165284281	h3k4me3.q.05_peak_798
1	165459019	165462546	h3k4me3.q.05_peak_799
1	165632731	165635531	h3k4me3.q.05_peak_800
1	165641175	165643798	h3k4me3.q.05_peak_801
1	165707633	165708519	h3k4me3.q.05_peak_802
1	165763055	165764652	h3k4me3.q.05_peak_803
1	165780025	165781174	h3k4me3.q.05_peak_804
1	165844345	165845659	h3k4me3.q.05_peak_805
1	165930683	165931064	h3k4me3.q.05_peak_806
1	165931931	165935200	h3k4me3.q.05_peak_807
1	165965411	165965776	h3k4me3.q.05_peak_808
1	165966196	165966604	h3k4me3.q.05_peak_809
1	166000159	166003840	h3k4me3.q.05_peak_810
1	166047687	166049319	h3k4me3.q.05_peak_811
1	166253744	166256018	h3k4me3.q.05_peak_812
1	166280537	166281220	h3k4me3.q.05_peak_813
1	166282560	166283267	h3k4me3.q.05_peak_814
1	166308729	166309759	h3k4me3.q.05_peak_815
1	166378587	166380780	h3k4me3.q.05_peak_816
1	166408701	166410297	h3k4me3.q.05_peak_817
1	166939837	166940478	h3k4me3.q.05_peak_818
1	167000095	167003373	h3k4me3.q.05_peak_819
1	167269887	167271325	h3k4me3.q.05_peak_820
1	167282423	167285880	h3k4me3.q.05_peak_821
1	167307367	167309531	h3k4me3.q.05_peak_822
1	167339652	167340898	h3k4me3.q.05_peak_823
1	167349629	167351195	h3k4me3.q.05_peak_824
1	167392638	167394738	h3k4me3.q.05_peak_825
1	167598177	167599134	h3k4me3.q.05_peak_826
1	167660299	167661243	h3k4me3.q.05_peak_827
1	167687581	167689809	h3k4me3.q.05_peak_828
1	167802075	167803586	h3k4me3.q.05_peak_829
1	168044907	168045299	h3k4me3.q.05_peak_830
1	168045844	168046221	h3k4me3.q.05_peak_831
1	168241373	168241891	h3k4me3.q.05_peak_832
1	168328177	168328483	h3k4me3.q.05_peak_833
1	168356904	168357419	h3k4me3.q.05_peak_834
1	168383929	168384911	h3k4me3.q.05_peak_835
1	168391516	168392713	h3k4me3.q.05_peak_836
1	168423236	168423687	h3k4me3.q.05_peak_837
1	168424326	168424661	h3k4me3.q.05_peak_838
1	168424989	168433056	h3k4me3.q.05_peak_839
1	169530059	169532311	h3k4me3.q.05_peak_840
1	169745983	169746728	h3k4me3.q.05_peak_841
1	169747275	169748108	h3k4me3.q.05_peak_842
1	169928715	169929044	h3k4me3.q.05_peak_843
1	169933944	169934684	h3k4me3.q.05_peak_844
1	169967921	169970400	h3k4me3.q.05_peak_845
1	170173799	170175905	h3k4me3.q.05_peak_846
1	170214087	170215965	h3k4me3.q.05_peak_847
1	170254983	170256165	h3k4me3.q.05_peak_848
1	170587335	170590385	h3k4me3.q.05_peak_849
1	170643825	170647092	h3k4me3.q.05_peak_850
1	170866465	170869283	h3k4me3.q.05_peak_851
1	170884160	170885735	h3k4me3.q.05_peak_852
1	170907134	170908817	h3k4me3.q.05_peak_853
1	171032460	171035597	h3k4me3.q.05_peak_854
1	171036293	171039100	h3k4me3.q.05_peak_855
1	171043919	171045804	h3k4me3.q.05_peak_856
1	171085611	171086589	h3k4me3.q.05_peak_857
1	171101622	171103468	h3k4me3.q.05_peak_858
1	171110668	171112690	h3k4me3.q.05_peak_859
1	171113561	171114463	h3k4me3.q.05_peak_860
1	171149508	171151694	h3k4me3.q.05_peak_861
1	171195500	171196323	h3k4me3.q.05_peak_862
1	171221076	171222957	h3k4me3.q.05_peak_863
1	171246138	171247913	h3k4me3.q.05_peak_864
1	171250399	171252548	h3k4me3.q.05_peak_865
1	171262643	171263613	h3k4me3.q.05_peak_866
1	171269639	171271449	h3k4me3.q.05_peak_867
1	171280179	171281918	h3k4me3.q.05_peak_868
1	171286941	171288313	h3k4me3.q.05_peak_869
1	171293546	171295423	h3k4me3.q.05_peak_870
1	171327762	171331252	h3k4me3.q.05_peak_871
1	171344861	171346653	h3k4me3.q.05_peak_872
1	171360238	171361747	h3k4me3.q.05_peak_873
1	171410607	171413144	h3k4me3.q.05_peak_874
1	171437426	171438001	h3k4me3.q.05_peak_875
1	171502600	171504973	h3k4me3.q.05_peak_876
1	172014155	172017733	h3k4me3.q.05_peak_877
1	172021737	172022970	h3k4me3.q.05_peak_878
1	172023557	172029008	h3k4me3.q.05_peak_879
1	172047147	172047505	h3k4me3.q.05_peak_880
1	172047897	172049812	h3k4me3.q.05_peak_881
1	172052930	172058242	h3k4me3.q.05_peak_882
1	172060958	172061267	h3k4me3.q.05_peak_883
1	172081407	172083887	h3k4me3.q.05_peak_884
1	172126292	172127881	h3k4me3.q.05_peak_885
1	172147478	172150534	h3k4me3.q.05_peak_886
1	172200555	172207542	h3k4me3.q.05_peak_887
1	172296318	172298097	h3k4me3.q.05_peak_888
1	172309647	172310431	h3k4me3.q.05_peak_889
1	172311099	172315227	h3k4me3.q.05_peak_890
1	172326353	172326762	h3k4me3.q.05_peak_891
1	172328974	172329263	h3k4me3.q.05_peak_892
1	172340425	172343377	h3k4me3.q.05_peak_893
1	172349757	172350387	h3k4me3.q.05_peak_894
1	172375608	172378177	h3k4me3.q.05_peak_895
1	172391948	172392306	h3k4me3.q.05_peak_896
1	172481208	172487256	h3k4me3.q.05_peak_897
1	172499885	172501690	h3k4me3.q.05_peak_898
1	172502711	172503050	h3k4me3.q.05_peak_899
1	172520821	172521163	h3k4me3.q.05_peak_900
1	172549542	172551126	h3k4me3.q.05_peak_901
1	172562035	172563689	h3k4me3.q.05_peak_902
1	172585889	172586180	h3k4me3.q.05_peak_903
1	172616436	172617512	h3k4me3.q.05_peak_904
1	172632065	172633500	h3k4me3.q.05_peak_905
1	173349838	173351304	h3k4me3.q.05_peak_906
1	173365575	173368499	h3k4me3.q.05_peak_907
1	173389434	173390650	h3k4me3.q.05_peak_908
1	174501438	174504532	h3k4me3.q.05_peak_909
1	174921358	174921912	h3k4me3.q.05_peak_910
1	175491570	175493171	h3k4me3.q.05_peak_911
1	175624352	175626171	h3k4me3.q.05_peak_912
1	175691023	175693657	h3k4me3.q.05_peak_913
1	175880101	175881877	h3k4me3.q.05_peak_914
1	176274375	176276024	h3k4me3.q.05_peak_915
1	176811527	176815673	h3k4me3.q.05_peak_916
1	176835513	176836134	h3k4me3.q.05_peak_917
1	176946698	176946986	h3k4me3.q.05_peak_918
1	176996730	176997241	h3k4me3.q.05_peak_919
1	176997863	176998676	h3k4me3.q.05_peak_920
1	177150032	177150574	h3k4me3.q.05_peak_921
1	177253893	177260297	h3k4me3.q.05_peak_922
1	177322488	177323593	h3k4me3.q.05_peak_923
1	177338538	177339347	h3k4me3.q.05_peak_924
1	177440908	177452957	h3k4me3.q.05_peak_925
1	177458376	177459431	h3k4me3.q.05_peak_926
1	177702371	177702972	h3k4me3.q.05_peak_927
1	177794207	177796925	h3k4me3.q.05_peak_928
[truncated: 17,103 more rows]

## Sheet: H3K27ac_CR_E14_CTX_Peaks
1	3094856	3095615	h3k27ac.q.05_peak_1
[truncated: 47,301 more rows]

[truncated: 3 more sheets: H3K4me1_CR_PFC_Peaks, H3K4me3_CR_PFC_Peaks, H3K27ac_CR_PFC_Peaks]
