# Supplementary material for: MYT1L is required for suppressing earlier neuronal development programs in the adult mouse brain
Source: Genome Res. 2023 Apr;33(4):541–56. doi: 10.1101/gr.277413.122 (PMC10234307; doi:10.1101/gr.277413.122)
Supplement: Supplemental Material [file supp_gr.277413.122_Supplemental_Table_S2.xlsx]

## Sheet: MYT1L_PFC_TSS
Supplemental Table S2. Subcategories of MYT1L Targets
PeakID	Chr	Start	End
2_wt.q.05_peak_33618	chr5	30949506	30950768
2_wt.q.05_peak_32869	chr4	141147164	141147816
2_wt.q.05_peak_558	chr1	37996151	37998208
2_wt.q.05_peak_46207	chrX	134585659	134586669
2_wt.q.05_peak_26678	chr2	127788346	127789464
2_wt.q.05_peak_19408	chr17	5440046	5440827
2_wt.q.05_peak_45064	chr9	97110501	97111395
2_wt.q.05_peak_38744	chr7	27674673	27675148
2_wt.q.05_peak_1005	chr1	58504715	58505583
2_wt.q.05_peak_32484	chr4	127986958	127988245
2_wt.q.05_peak_5246	chr10	93452678	93453787
2_wt.q.05_peak_15881	chr15	33687622	33688876
2_wt.q.05_peak_12783	chr13	93499948	93500798
2_wt.q.05_peak_42130	chr8	71487168	71489218
2_wt.q.05_peak_38428	chr6	149099713	149102227
2_wt.q.05_peak_40061	chr7	100606998	100607461
2_wt.q.05_peak_43906	chr9	43103785	43107916
2_wt.q.05_peak_26221	chr2	106523002	106523735
2_wt.q.05_peak_21304	chr18	23309920	23310390
2_wt.q.05_peak_35608	chr5	140830353	140831027
2_wt.q.05_peak_17971	chr16	20733358	20734011
2_wt.q.05_peak_40664	chr7	127513155	127514024
2_wt.q.05_peak_2126	chr1	133908245	133909044
2_wt.q.05_peak_24271	chr2	13270940	13272147
2_wt.q.05_peak_27894	chr3	14610514	14612186
2_wt.q.05_peak_32190	chr4	114405344	114406159
2_wt.q.05_peak_36437	chr6	37441484	37443206
2_wt.q.05_peak_26592	chr2	121955823	121957007
2_wt.q.05_peak_26210	chr2	105016656	105017332
2_wt.q.05_peak_8840	chr11	121433600	121436103
2_wt.q.05_peak_21655	chr18	37955613	37956673
2_wt.q.05_peak_5260	chr10	94198477	94199396
2_wt.q.05_peak_38993	chr7	44996922	44998531
2_wt.q.05_peak_802	chr1	51332789	51334835
2_wt.q.05_peak_22569	chr18	77938068	77938763
2_wt.q.05_peak_30597	chr4	7560056	7560440
2_wt.q.05_peak_11284	chr13	17805117	17805956
2_wt.q.05_peak_30394	chr3	152980955	152982190
2_wt.q.05_peak_31134	chr4	45083683	45084106
2_wt.q.05_peak_40176	chr7	109083062	109083627
2_wt.q.05_peak_39043	chr7	45783160	45783789
2_wt.q.05_peak_31345	chr4	58943314	58944263
2_wt.q.05_peak_37899	chr6	118454451	118455627
2_wt.q.05_peak_7113	chr11	58322504	58323331
2_wt.q.05_peak_1585	chr1	90603080	90603740
2_wt.q.05_peak_33439	chr5	21700043	21702029
2_wt.q.05_peak_719	chr1	44102168	44102763
2_wt.q.05_peak_44788	chr9	78481927	78482382
2_wt.q.05_peak_16750	chr15	75841537	75841855
2_wt.q.05_peak_39122	chr7	49975152	49975748
2_wt.q.05_peak_25214	chr2	60210408	60211280
2_wt.q.05_peak_44357	chr9	59655716	59658778
2_wt.q.05_peak_8366	chr11	103954240	103954534
2_wt.q.05_peak_2053	chr1	131827323	131828457
2_wt.q.05_peak_37130	chr6	86683794	86684941
2_wt.q.05_peak_31266	chr4	53439525	53440354
2_wt.q.05_peak_19937	chr17	33684492	33685752
2_wt.q.05_peak_42597	chr8	95702357	95705290
2_wt.q.05_peak_14547	chr14	67715683	67716810
2_wt.q.05_peak_32621	chr4	132534785	132535870
2_wt.q.05_peak_29888	chr3	126595546	126596848
2_wt.q.05_peak_10406	chr12	87146598	87148328
2_wt.q.05_peak_242	chr1	21958787	21963674
2_wt.q.05_peak_35079	chr5	120648945	120649342
2_wt.q.05_peak_22858	chr19	6240919	6241759
2_wt.q.05_peak_29255	chr3	95133494	95133996
2_wt.q.05_peak_4576	chr10	63243978	63245141
2_wt.q.05_peak_30615	chr4	9268046	9268602
2_wt.q.05_peak_6131	chr11	5098817	5099977
2_wt.q.05_peak_33084	chr4	155086407	155087103
2_wt.q.05_peak_46121	chrX	98937517	98937990
2_wt.q.05_peak_34381	chr5	76183242	76183813
2_wt.q.05_peak_37731	chr6	113306413	113307148
2_wt.q.05_peak_29404	chr3	100161970	100162928
2_wt.q.05_peak_24758	chr2	35557735	35558357
2_wt.q.05_peak_38992	chr7	44986453	44987240
2_wt.q.05_peak_26667	chr2	127207965	127208842
2_wt.q.05_peak_36850	chr6	65042126	65043032
2_wt.q.05_peak_23422	chr19	36555076	36556167
2_wt.q.05_peak_38222	chr6	136807770	136809514
2_wt.q.05_peak_5223	chr10	93160192	93160527
2_wt.q.05_peak_11523	chr13	28952028	28954289
2_wt.q.05_peak_2171	chr1	135429660	135431028
2_wt.q.05_peak_25726	chr2	80314055	80315647
2_wt.q.05_peak_20146	chr17	46673591	46674354
2_wt.q.05_peak_38833	chr7	30321147	30323047
2_wt.q.05_peak_37167	chr6	87671746	87672200
2_wt.q.05_peak_27300	chr2	153240482	153242099
2_wt.q.05_peak_32612	chr4	132329653	132329919
2_wt.q.05_peak_35530	chr5	136953244	136953871
2_wt.q.05_peak_20323	chr17	57769172	57770183
2_wt.q.05_peak_43426	chr9	24501720	24502910
2_wt.q.05_peak_7027	chr11	54437406	54439939
2_wt.q.05_peak_12111	chr13	58806622	58808557
2_wt.q.05_peak_19976	chr17	34951266	34951671
2_wt.q.05_peak_33212	chr5	9160515	9161595
2_wt.q.05_peak_30687	chr4	13784602	13786671
2_wt.q.05_peak_30826	chr4	24849697	24851661
2_wt.q.05_peak_3292	chr1	182282887	182283439
2_wt.q.05_peak_31104	chr4	43441790	43442989
2_wt.q.05_peak_24481	chr2	25607502	25608325
2_wt.q.05_peak_26775	chr2	131352723	131353421
2_wt.q.05_peak_45607	chr9	114731361	114732381
2_wt.q.05_peak_44345	chr9	59486783	59487503
2_wt.q.05_peak_4269	chr10	41449856	41450960
2_wt.q.05_peak_43234	chr9	9238152	9238805
2_wt.q.05_peak_167	chr1	16092026	16092673
2_wt.q.05_peak_18214	chr16	31948736	31949271
2_wt.q.05_peak_45797	chr9	124422628	124423051
2_wt.q.05_peak_2843	chr1	166002491	166003689
2_wt.q.05_peak_19952	chr17	33940135	33940882
2_wt.q.05_peak_36793	chr6	57824703	57825512
2_wt.q.05_peak_35080	chr5	120649719	120650005
2_wt.q.05_peak_45743	chr9	122117963	122118376
2_wt.q.05_peak_13897	chr14	31000945	31001608
2_wt.q.05_peak_2783	chr1	164275411	164276618
2_wt.q.05_peak_45092	chr9	99242344	99243650
2_wt.q.05_peak_37729	chr6	113237552	113238098
2_wt.q.05_peak_42067	chr8	69774136	69775236
2_wt.q.05_peak_33629	chr5	31192480	31193558
2_wt.q.05_peak_43934	chr9	44343335	44344229
2_wt.q.05_peak_31387	chr4	64046884	64047457
2_wt.q.05_peak_42360	chr8	84772771	84774085
2_wt.q.05_peak_43029	chr8	123373049	123373958
2_wt.q.05_peak_41859	chr8	58909558	58913200
2_wt.q.05_peak_10219	chr12	81594979	81595833
2_wt.q.05_peak_23089	chr19	17393551	17394959
2_wt.q.05_peak_42590	chr8	95633251	95634272
2_wt.q.05_peak_42392	chr8	85060128	85060606
2_wt.q.05_peak_12223	chr13	65112324	65113470
2_wt.q.05_peak_23573	chr19	44068576	44069397
2_wt.q.05_peak_35782	chr5	149184486	149185257
2_wt.q.05_peak_34563	chr5	92042178	92043696
2_wt.q.05_peak_9774	chr12	59060680	59061720
2_wt.q.05_peak_38429	chr6	149188086	149189076
2_wt.q.05_peak_25805	chr2	84715146	84716927
2_wt.q.05_peak_43000	chr8	122676948	122677569
2_wt.q.05_peak_14213	chr14	55509887	55510595
2_wt.q.05_peak_37674	chr6	110645245	110646415
2_wt.q.05_peak_32043	chr4	104366835	104370176
2_wt.q.05_peak_29393	chr3	98381991	98382986
2_wt.q.05_peak_4122	chr10	32890239	32890969
2_wt.q.05_peak_13400	chr13	119756004	119756886
2_wt.q.05_peak_42265	chr8	81015156	81015600
2_wt.q.05_peak_5781	chr10	116017846	116019755
2_wt.q.05_peak_35556	chr5	138160838	138161495
2_wt.q.05_peak_20808	chr17	84626150	84627177
2_wt.q.05_peak_22491	chr18	74065492	74066160
2_wt.q.05_peak_39610	chr7	81454943	81456078
2_wt.q.05_peak_26449	chr2	117249243	117249934
2_wt.q.05_peak_40885	chr7	141429089	141429783
2_wt.q.05_peak_40651	chr7	127208766	127209616
2_wt.q.05_peak_40496	chr7	122133045	122133458
2_wt.q.05_peak_4737	chr10	70440347	70441095
2_wt.q.05_peak_26	chr1	5082521	5084062
2_wt.q.05_peak_6169	chr11	6267374	6268617
2_wt.q.05_peak_23916	chr19	58942918	58943586
2_wt.q.05_peak_1216	chr1	70725255	70726880
2_wt.q.05_peak_35211	chr5	123720900	123721584
2_wt.q.05_peak_27379	chr2	156196171	156197523
2_wt.q.05_peak_22852	chr19	6060309	6061841
2_wt.q.05_peak_35651	chr5	143234751	143235514
2_wt.q.05_peak_11457	chr13	23761524	23763876
2_wt.q.05_peak_1601	chr1	91249619	91250168
2_wt.q.05_peak_28358	chr3	50443702	50444338
2_wt.q.05_peak_23785	chr19	53390830	53391191
2_wt.q.05_peak_9734	chr12	55398193	55399240
2_wt.q.05_peak_45308	chr9	107533179	107534274
2_wt.q.05_peak_41605	chr8	41373642	41375653
2_wt.q.05_peak_33140	chr5	3802869	3805076
2_wt.q.05_peak_8060	chr11	96788527	96789305
2_wt.q.05_peak_4628	chr10	67095941	67096299
2_wt.q.05_peak_24024	chr2	5950066	5951379
2_wt.q.05_peak_38639	chr7	19344497	19345773
2_wt.q.05_peak_41064	chr8	11550509	11551204
2_wt.q.05_peak_27287	chr2	152398326	152398856
2_wt.q.05_peak_7903	chr11	87592125	87592415
2_wt.q.05_peak_34333	chr5	73646744	73647158
2_wt.q.05_peak_34011	chr5	52783122	52783700
2_wt.q.05_peak_12145	chr13	59555333	59556719
2_wt.q.05_peak_29332	chr3	96595603	96597665
2_wt.q.05_peak_40948	chr8	4165551	4166437
2_wt.q.05_peak_46358	chrX	162829021	162830190
2_wt.q.05_peak_32847	chr4	139622175	139622567
2_wt.q.05_peak_11554	chr13	30973354	30974057
2_wt.q.05_peak_16165	chr15	44618623	44618999
2_wt.q.05_peak_34958	chr5	114130813	114131398
2_wt.q.05_peak_41317	chr8	25016487	25016909
2_wt.q.05_peak_33213	chr5	9161914	9162411
2_wt.q.05_peak_29130	chr3	88552550	88553660
2_wt.q.05_peak_5115	chr10	89872048	89875026
2_wt.q.05_peak_30628	chr4	9770114	9771232
2_wt.q.05_peak_18221	chr16	32245772	32246545
2_wt.q.05_peak_17899	chr16	17832950	17833239
2_wt.q.05_peak_12685	chr13	91806954	91807928
2_wt.q.05_peak_20654	chr17	75551307	75552756
2_wt.q.05_peak_23943	chr19	60874137	60874885
2_wt.q.05_peak_40706	chr7	128744900	128745330
2_wt.q.05_peak_32761	chr4	137594379	137595318
2_wt.q.05_peak_8878	chr12	4081921	4083636
2_wt.q.05_peak_7592	chr11	77607628	77608584
2_wt.q.05_peak_43450	chr9	25250453	25252511
2_wt.q.05_peak_18040	chr16	23224910	23225632
2_wt.q.05_peak_9363	chr12	32061242	32061834
2_wt.q.05_peak_33330	chr5	19225714	19226727
2_wt.q.05_peak_37836	chr6	115601907	115602595
2_wt.q.05_peak_7993	chr11	93884350	93887745
2_wt.q.05_peak_13415	chr14	8098224	8099337
2_wt.q.05_peak_4544	chr10	61679780	61680099
2_wt.q.05_peak_16960	chr15	81190896	81191665
2_wt.q.05_peak_35248	chr5	124354617	124355875
2_wt.q.05_peak_25858	chr2	90846597	90848282
2_wt.q.05_peak_20442	chr17	66110884	66112214
2_wt.q.05_peak_1665	chr1	95666038	95668442
2_wt.q.05_peak_16760	chr15	76326885	76327922
2_wt.q.05_peak_40880	chr7	141172143	141173072
2_wt.q.05_peak_38946	chr7	41393093	41393873
2_wt.q.05_peak_11903	chr13	48512930	48513936
2_wt.q.05_peak_27698	chr2	172999751	173000374
2_wt.q.05_peak_140	chr1	13370785	13372784
2_wt.q.05_peak_22973	chr19	10181515	10183716
2_wt.q.05_peak_7209	chr11	61930467	61930770
2_wt.q.05_peak_29568	chr3	108017611	108018013
2_wt.q.05_peak_43653	chr9	32220658	32228542
2_wt.q.05_peak_20113	chr17	45432620	45434440
2_wt.q.05_peak_4817	chr10	75763865	75765298
2_wt.q.05_peak_21079	chr18	6764599	6765694
2_wt.q.05_peak_16943	chr15	80797917	80800735
2_wt.q.05_peak_10836	chr12	108836044	108836396
2_wt.q.05_peak_27804	chr3	5217703	5219874
2_wt.q.05_peak_27495	chr2	161108049	161110644
2_wt.q.05_peak_40879	chr7	141168444	141169379
2_wt.q.05_peak_27079	chr2	142900379	142902041
2_wt.q.05_peak_19975	chr17	34931390	34931866
2_wt.q.05_peak_15260	chr14	118924250	118925510
2_wt.q.05_peak_42809	chr8	109706643	109707055
2_wt.q.05_peak_32742	chr4	136052959	136053341
2_wt.q.05_peak_10608	chr12	98919816	98921180
2_wt.q.05_peak_39290	chr7	64391711	64392849
2_wt.q.05_peak_26660	chr2	126932115	126933524
2_wt.q.05_peak_45633	chr9	118149691	118150625
2_wt.q.05_peak_27479	chr2	160645624	160646071
2_wt.q.05_peak_7118	chr11	58903403	58904956
2_wt.q.05_peak_16772	chr15	76639784	76640706
2_wt.q.05_peak_26685	chr2	128817534	128819162
2_wt.q.05_peak_6114	chr11	4849184	4850065
2_wt.q.05_peak_36764	chr6	56714343	56716504
2_wt.q.05_peak_4672	chr10	68276282	68280427
2_wt.q.05_peak_46178	chrX	109095125	109095404
2_wt.q.05_peak_27363	chr2	155691103	155691730
2_wt.q.05_peak_36949	chr6	72597724	72599413
2_wt.q.05_peak_37756	chr6	113623168	113623732
2_wt.q.05_peak_6015	chr10	128081852	128083897
2_wt.q.05_peak_38206	chr6	136173223	136173616
2_wt.q.05_peak_27648	chr2	167689779	167691180
2_wt.q.05_peak_9690	chr12	52603007	52603542
2_wt.q.05_peak_12465	chr13	81782745	81785009
2_wt.q.05_peak_6004	chr10	127621252	127621734
2_wt.q.05_peak_22304	chr18	67448849	67449808
2_wt.q.05_peak_31361	chr4	59580379	59582317
2_wt.q.05_peak_8113	chr11	97781437	97782359
2_wt.q.05_peak_30738	chr4	16163108	16163594
2_wt.q.05_peak_42846	chr8	111145936	111146249
2_wt.q.05_peak_9943	chr12	70307053	70308488
2_wt.q.05_peak_485	chr1	34843116	34843602
2_wt.q.05_peak_39981	chr7	97841229	97844348
2_wt.q.05_peak_7459	chr11	72795546	72796069
2_wt.q.05_peak_10324	chr12	84315837	84317780
2_wt.q.05_peak_32126	chr4	108618688	108620810
2_wt.q.05_peak_5974	chr10	127069300	127071496
2_wt.q.05_peak_35143	chr5	122421927	122422401
2_wt.q.05_peak_46097	chrX	94212443	94212910
2_wt.q.05_peak_2957	chr1	170215642	170215964
2_wt.q.05_peak_40815	chr7	137410247	137411335
2_wt.q.05_peak_39041	chr7	45714309	45714781
2_wt.q.05_peak_13760	chr14	25841761	25842771
2_wt.q.05_peak_18064	chr16	25059038	25059854
2_wt.q.05_peak_21534	chr18	34860859	34861121
2_wt.q.05_peak_29114	chr3	88324814	88325448
2_wt.q.05_peak_33514	chr5	24423321	24424096
2_wt.q.05_peak_30286	chr3	145117917	145118781
2_wt.q.05_peak_20029	chr17	36981157	36981786
2_wt.q.05_peak_38303	chr6	142506115	142508623
2_wt.q.05_peak_4194	chr10	39732211	39733406
2_wt.q.05_peak_12241	chr13	67552866	67553258
2_wt.q.05_peak_24240	chr2	11776490	11778828
2_wt.q.05_peak_5819	chr10	117710852	117711365
2_wt.q.05_peak_143	chr1	13659977	13660790
2_wt.q.05_peak_46192	chrX	122397590	122398180
2_wt.q.05_peak_38581	chr7	16614963	16615977
2_wt.q.05_peak_25917	chr2	91730778	91731386
2_wt.q.05_peak_1777	chr1	105989451	105990780
2_wt.q.05_peak_23011	chr19	11911039	11912333
2_wt.q.05_peak_42092	chr8	70477056	70477358
2_wt.q.05_peak_25555	chr2	73595927	73597302
2_wt.q.05_peak_34036	chr5	53588539	53591715
2_wt.q.05_peak_32936	chr4	148591073	148592600
2_wt.q.05_peak_28285	chr3	41082009	41082531
2_wt.q.05_peak_3397	chr1	190927702	190929424
2_wt.q.05_peak_19940	chr17	33759502	33760920
2_wt.q.05_peak_2865	chr1	166379542	166380104
2_wt.q.05_peak_19134	chr16	87454566	87454867
2_wt.q.05_peak_26485	chr2	119112131	119112982
2_wt.q.05_peak_33106	chr4	155408769	155409677
2_wt.q.05_peak_45902	chrX	23692267	23693836
2_wt.q.05_peak_31363	chr4	59805306	59805768
2_wt.q.05_peak_14096	chr14	47648650	47649213
2_wt.q.05_peak_11335	chr13	20090052	20090506
2_wt.q.05_peak_8092	chr11	97450235	97450580
2_wt.q.05_peak_38669	chr7	24529918	24531760
2_wt.q.05_peak_9837	chr12	65072114	65076665
2_wt.q.05_peak_41483	chr8	35494691	35496075
2_wt.q.05_peak_20709	chr17	80224120	80224858
2_wt.q.05_peak_37974	chr6	121130312	121131310
2_wt.q.05_peak_12805	chr13	94788619	94789141
2_wt.q.05_peak_36462	chr6	38551374	38552376
2_wt.q.05_peak_11680	chr13	41604973	41605889
2_wt.q.05_peak_16991	chr15	81960374	81961480
2_wt.q.05_peak_37097	chr6	85961221	85962431
2_wt.q.05_peak_45310	chr9	107554915	107555407
2_wt.q.05_peak_1038	chr1	60342788	60344173
2_wt.q.05_peak_38957	chr7	43606641	43607105
2_wt.q.05_peak_45419	chr9	110655966	110657611
2_wt.q.05_peak_3061	chr1	172328108	172329292
2_wt.q.05_peak_4326	chr10	43220493	43222102
2_wt.q.05_peak_11104	chr13	8885563	8886754
2_wt.q.05_peak_1263	chr1	74505223	74507035
2_wt.q.05_peak_9514	chr12	41486772	41487125
2_wt.q.05_peak_43031	chr8	123411127	123413706
2_wt.q.05_peak_44353	chr9	59588427	59590194
2_wt.q.05_peak_5042	chr10	84576259	84577066
2_wt.q.05_peak_29588	chr3	108256202	108257931
2_wt.q.05_peak_14049	chr14	45219110	45221919
2_wt.q.05_peak_37040	chr6	83165286	83166300
2_wt.q.05_peak_1103	chr1	63964159	63965904
2_wt.q.05_peak_7107	chr11	58008282	58008722
2_wt.q.05_peak_38640	chr7	19359470	19361881
2_wt.q.05_peak_23066	chr19	16132886	16134116
2_wt.q.05_peak_40868	chr7	140855292	140856132
2_wt.q.05_peak_10589	chr12	98574986	98575303
2_wt.q.05_peak_22531	chr18	76943313	76944912
2_wt.q.05_peak_12353	chr13	74640223	74640757
2_wt.q.05_peak_36920	chr6	71830844	71832501
2_wt.q.05_peak_27342	chr2	154892227	154893548
2_wt.q.05_peak_27828	chr3	8508808	8510570
2_wt.q.05_peak_10169	chr12	79295767	79297659
2_wt.q.05_peak_31042	chr4	40757480	40758215
2_wt.q.05_peak_24362	chr2	19553481	19554842
2_wt.q.05_peak_4964	chr10	81182943	81183862
2_wt.q.05_peak_41780	chr8	54600141	54601409
2_wt.q.05_peak_20708	chr17	80206766	80208238
2_wt.q.05_peak_5258	chr10	94147423	94148244
2_wt.q.05_peak_2744	chr1	161251197	161251707
2_wt.q.05_peak_16523	chr15	66576858	66578911
2_wt.q.05_peak_366	chr1	25825875	25831754
2_wt.q.05_peak_2516	chr1	154724273	154726013
2_wt.q.05_peak_11239	chr13	14612796	14613706
2_wt.q.05_peak_23577	chr19	44106894	44108684
2_wt.q.05_peak_10310	chr12	83919185	83923785
2_wt.q.05_peak_20148	chr17	46680613	46681432
2_wt.q.05_peak_30360	chr3	152191729	152194146
2_wt.q.05_peak_42263	chr8	80739677	80740301
2_wt.q.05_peak_35892	chr6	8258392	8260612
2_wt.q.05_peak_38627	chr7	19282016	19282871
2_wt.q.05_peak_19698	chr17	25015893	25016762
2_wt.q.05_peak_7998	chr11	93996733	93997132
2_wt.q.05_peak_44549	chr9	66834440	66835396
2_wt.q.05_peak_27319	chr2	154435687	154437606
2_wt.q.05_peak_8258	chr11	101424071	101426299
2_wt.q.05_peak_23502	chr19	40894748	40895529
2_wt.q.05_peak_3011	chr1	171149907	171151252
2_wt.q.05_peak_33113	chr4	155624168	155624686
2_wt.q.05_peak_26825	chr2	132247059	132248322
2_wt.q.05_peak_38979	chr7	44748409	44749150
2_wt.q.05_peak_17940	chr16	20097266	20098457
2_wt.q.05_peak_27559	chr2	164878411	164879077
2_wt.q.05_peak_16121	chr15	41829908	41831838
2_wt.q.05_peak_44785	chr9	78191558	78192281
2_wt.q.05_peak_44261	chr9	57075041	57077442
2_wt.q.05_peak_21645	chr18	37818720	37820753
2_wt.q.05_peak_5434	chr10	100588628	100589822
2_wt.q.05_peak_42230	chr8	77518198	77518998
2_wt.q.05_peak_33040	chr4	152008595	152009610
2_wt.q.05_peak_45162	chr9	103365729	103366517
2_wt.q.05_peak_23637	chr19	45998290	45999088
2_wt.q.05_peak_42297	chr8	83331908	83332987
2_wt.q.05_peak_13388	chr13	119462443	119463317
2_wt.q.05_peak_45976	chrX	57392030	57393519
2_wt.q.05_peak_7467	chr11	73018693	73020022
2_wt.q.05_peak_35256	chr5	124439344	124441306
2_wt.q.05_peak_12226	chr13	66904542	66905987
2_wt.q.05_peak_35392	chr5	130144274	130145213
2_wt.q.05_peak_45468	chr9	112118483	112119158
2_wt.q.05_peak_31928	chr4	98922904	98923930
2_wt.q.05_peak_1501	chr1	86111720	86112423
2_wt.q.05_peak_36911	chr6	71631123	71633774
2_wt.q.05_peak_45003	chr9	94668593	94670783
2_wt.q.05_peak_6188	chr11	6605413	6606318
2_wt.q.05_peak_12319	chr13	70637839	70638466
2_wt.q.05_peak_2840	chr1	165763425	165764003
2_wt.q.05_peak_26225	chr2	106694003	106695295
2_wt.q.05_peak_46167	chrX	105391327	105392124
2_wt.q.05_peak_19888	chr17	30611800	30612720
2_wt.q.05_peak_32553	chr4	129672854	129673582
2_wt.q.05_peak_24443	chr2	23067667	23070129
2_wt.q.05_peak_4843	chr10	76468140	76469236
2_wt.q.05_peak_8246	chr11	101082326	101082963
2_wt.q.05_peak_35149	chr5	122502025	122503466
2_wt.q.05_peak_18546	chr16	44138710	44139671
2_wt.q.05_peak_44751	chr9	75682573	75684970
2_wt.q.05_peak_17784	chr16	13109262	13109805
2_wt.q.05_peak_38626	chr7	19227180	19229478
2_wt.q.05_peak_1359	chr1	78310371	78311454
2_wt.q.05_peak_39159	chr7	55793578	55794761
2_wt.q.05_peak_22173	chr18	61785976	61786385
2_wt.q.05_peak_38757	chr7	28178645	28179916
2_wt.q.05_peak_3209	chr1	178405154	178405518
2_wt.q.05_peak_6564	chr11	30954371	30955351
2_wt.q.05_peak_13387	chr13	119429146	119430442
2_wt.q.05_peak_8662	chr11	115536616	115537342
2_wt.q.05_peak_2012	chr1	130715113	130717295
2_wt.q.05_peak_28639	chr3	65658341	65658866
2_wt.q.05_peak_19673	chr17	24478806	24479353
2_wt.q.05_peak_15937	chr15	36608203	36608787
2_wt.q.05_peak_19136	chr16	87495218	87496520
2_wt.q.05_peak_36222	chr6	30401224	30401989
2_wt.q.05_peak_7227	chr11	62602852	62603851
2_wt.q.05_peak_35168	chr5	122850232	122850914
2_wt.q.05_peak_26121	chr2	102400735	102401512
2_wt.q.05_peak_42744	chr8	106058490	106060880
2_wt.q.05_peak_12073	chr13	56894843	56895119
2_wt.q.05_peak_22327	chr18	67800066	67800713
2_wt.q.05_peak_40124	chr7	102222665	102223529
2_wt.q.05_peak_22497	chr18	74216203	74217066
2_wt.q.05_peak_9784	chr12	59216629	59220442
2_wt.q.05_peak_32137	chr4	109117755	109118979
2_wt.q.05_peak_29158	chr3	89177063	89178753
2_wt.q.05_peak_4559	chr10	62650239	62651931
2_wt.q.05_peak_28274	chr3	40744233	40747411
2_wt.q.05_peak_17013	chr15	83149454	83150254
2_wt.q.05_peak_11929	chr13	49681511	49682831
2_wt.q.05_peak_36061	chr6	18848065	18849379
2_wt.q.05_peak_13293	chr13	112926688	112928624
2_wt.q.05_peak_9148	chr12	17545102	17545773
2_wt.q.05_peak_15471	chr15	8168985	8169263
2_wt.q.05_peak_9336	chr12	31654177	31655126
2_wt.q.05_peak_14902	chr14	88470297	88470734
2_wt.q.05_peak_31108	chr4	43561531	43563947
2_wt.q.05_peak_25375	chr2	66440490	66441020
2_wt.q.05_peak_25650	chr2	77814546	77817391
2_wt.q.05_peak_23019	chr19	12036504	12037480
2_wt.q.05_peak_35812	chr5	150259002	150262650
2_wt.q.05_peak_507	chr1	36470972	36471368
2_wt.q.05_peak_46231	chrX	140542954	140543572
2_wt.q.05_peak_12658	chr13	90922917	90923451
2_wt.q.05_peak_9107	chr12	16810394	16811635
2_wt.q.05_peak_16143	chr15	43169893	43171134
2_wt.q.05_peak_11946	chr13	51651786	51652190
2_wt.q.05_peak_41870	chr8	60505821	60506314
2_wt.q.05_peak_11567	chr13	33935323	33935616
2_wt.q.05_peak_4244	chr10	40879770	40886664
2_wt.q.05_peak_2705	chr1	160211413	160214039
2_wt.q.05_peak_4963	chr10	81176781	81177415
2_wt.q.05_peak_31256	chr4	52438543	52439232
2_wt.q.05_peak_10718	chr12	101975534	101976669
2_wt.q.05_peak_29606	chr3	108443999	108445247
2_wt.q.05_peak_32232	chr4	116685572	116686373
2_wt.q.05_peak_44210	chr9	54734091	54734468
2_wt.q.05_peak_13411	chr14	8002896	8004506
2_wt.q.05_peak_458	chr1	33906624	33907538
2_wt.q.05_peak_39353	chr7	66078972	66080746
2_wt.q.05_peak_33114	chr4	155668993	155670265
2_wt.q.05_peak_32305	chr4	120569751	120570600
2_wt.q.05_peak_38473	chr7	4149652	4150313
2_wt.q.05_peak_25619	chr2	76648099	76648462
2_wt.q.05_peak_27805	chr3	5221630	5221974
2_wt.q.05_peak_31101	chr4	43380897	43381911
2_wt.q.05_peak_35112	chr5	121451457	121452369
2_wt.q.05_peak_42083	chr8	70234201	70234468
2_wt.q.05_peak_18719	chr16	56717472	56718087
2_wt.q.05_peak_18035	chr16	22857026	22857764
2_wt.q.05_peak_31379	chr4	62501722	62502269
2_wt.q.05_peak_42882	chr8	112010746	112012412
2_wt.q.05_peak_35673	chr5	144014274	144015189
2_wt.q.05_peak_45225	chr9	105495296	105496189
2_wt.q.05_peak_2582	chr1	156937917	156938924
2_wt.q.05_peak_6505	chr11	29246027	29247720
2_wt.q.05_peak_33312	chr5	17574618	17575075
2_wt.q.05_peak_24784	chr2	37430637	37432047
2_wt.q.05_peak_34552	chr5	90931799	90932518
2_wt.q.05_peak_9373	chr12	32952827	32955973
2_wt.q.05_peak_40595	chr7	125491094	125491797
2_wt.q.05_peak_22947	chr19	8837464	8838135
2_wt.q.05_peak_10355	chr12	85600846	85601140
2_wt.q.05_peak_32919	chr4	147940204	147941089
2_wt.q.05_peak_26722	chr2	129800961	129801777
2_wt.q.05_peak_9832	chr12	65035859	65037462
2_wt.q.05_peak_29248	chr3	95042243	95043251
2_wt.q.05_peak_10890	chr12	111573149	111574721
2_wt.q.05_peak_40682	chr7	127967239	127968738
2_wt.q.05_peak_169	chr1	16106319	16106775
2_wt.q.05_peak_22031	chr18	56561945	56563175
2_wt.q.05_peak_16952	chr15	80977813	80978090
2_wt.q.05_peak_14461	chr14	65262574	65262905
2_wt.q.05_peak_28985	chr3	84304495	84305914
2_wt.q.05_peak_13911	chr14	31494387	31495638
2_wt.q.05_peak_17512	chr15	102458827	102459589
2_wt.q.05_peak_7621	chr11	78260993	78263668
2_wt.q.05_peak_34546	chr5	90366298	90367823
2_wt.q.05_peak_7994	chr11	93955339	93956180
2_wt.q.05_peak_13895	chr14	30951040	30951846
2_wt.q.05_peak_29609	chr3	108537358	108537632
2_wt.q.05_peak_40692	chr7	128461346	128462216
2_wt.q.05_peak_33553	chr5	25705996	25706459
2_wt.q.05_peak_14427	chr14	64589212	64590333
2_wt.q.05_peak_27084	chr2	143062484	143063283
2_wt.q.05_peak_38121	chr6	134567288	134567684
2_wt.q.05_peak_5087	chr10	88379758	88380854
2_wt.q.05_peak_23563	chr19	43751760	43753976
2_wt.q.05_peak_33127	chr4	155891866	155892986
2_wt.q.05_peak_4907	chr10	79959423	79960155
2_wt.q.05_peak_24644	chr2	32360466	32363676
2_wt.q.05_peak_42914	chr8	116504743	116505062
2_wt.q.05_peak_6899	chr11	49243314	49244400
2_wt.q.05_peak_44737	chr9	75440945	75442170
2_wt.q.05_peak_34567	chr5	92309597	92310249
2_wt.q.05_peak_12702	chr13	92354067	92355015
2_wt.q.05_peak_46216	chrX	136244643	136244987
2_wt.q.05_peak_33738	chr5	34659288	34660817
2_wt.q.05_peak_19790	chr17	27017450	27018975
2_wt.q.05_peak_26854	chr2	132815533	132816554
2_wt.q.05_peak_42479	chr8	88696417	88697259
2_wt.q.05_peak_27742	chr2	180041477	180042951
2_wt.q.05_peak_38133	chr6	134886287	134888929
2_wt.q.05_peak_36582	chr6	45059631	45061539
2_wt.q.05_peak_9983	chr12	71014756	71016063
2_wt.q.05_peak_19810	chr17	27909531	27910433
2_wt.q.05_peak_35682	chr5	144099889	144101729
2_wt.q.05_peak_14152	chr14	52278842	52280117
2_wt.q.05_peak_36487	chr6	39573165	39574416
2_wt.q.05_peak_42386	chr8	85026490	85027009
2_wt.q.05_peak_25078	chr2	52424978	52426462
2_wt.q.05_peak_29385	chr3	98013536	98013812
2_wt.q.05_peak_11031	chr13	3611278	3611694
2_wt.q.05_peak_7120	chr11	58947374	58950256
2_wt.q.05_peak_7927	chr11	89059303	89061139
2_wt.q.05_peak_35602	chr5	140418098	140419291
2_wt.q.05_peak_6013	chr10	128058193	128060531
2_wt.q.05_peak_46324	chrX	160502177	160502683
2_wt.q.05_peak_38062	chr6	126939716	126940540
2_wt.q.05_peak_5813	chr10	117224018	117224852
2_wt.q.05_peak_11405	chr13	21944715	21945550
2_wt.q.05_peak_16431	chr15	61984770	61985893
2_wt.q.05_peak_6927	chr11	50174077	50175231
2_wt.q.05_peak_23957	chr2	3332242	3333457
2_wt.q.05_peak_27454	chr2	158028002	158028790
2_wt.q.05_peak_35480	chr5	135186197	135188518
2_wt.q.05_peak_42457	chr8	86650939	86652409
2_wt.q.05_peak_25817	chr2	85036598	85037906
2_wt.q.05_peak_5071	chr10	86704866	86706810
2_wt.q.05_peak_29541	chr3	107279041	107279498
2_wt.q.05_peak_8223	chr11	100574693	100575396
2_wt.q.05_peak_32533	chr4	129188597	129190842
2_wt.q.05_peak_3847	chr10	18233860	18235592
2_wt.q.05_peak_7391	chr11	69980334	69981056
2_wt.q.05_peak_44874	chr9	83924339	83925624
2_wt.q.05_peak_36733	chr6	55037335	55040297
2_wt.q.05_peak_11924	chr13	49420935	49421917
2_wt.q.05_peak_18222	chr16	32277390	32278309
2_wt.q.05_peak_34400	chr5	76950649	76952630
2_wt.q.05_peak_6041	chr10	128626268	128627131
2_wt.q.05_peak_34245	chr5	70841439	70843608
2_wt.q.05_peak_35200	chr5	123572091	123573377
2_wt.q.05_peak_29321	chr3	96262487	96264012
2_wt.q.05_peak_12369	chr13	75839696	75841340
2_wt.q.05_peak_37035	chr6	83101597	83101908
2_wt.q.05_peak_9472	chr12	38778120	38784353
2_wt.q.05_peak_3359	chr1	186748726	186749256
2_wt.q.05_peak_25207	chr2	59881543	59883095
2_wt.q.05_peak_42708	chr8	104641796	104642167
2_wt.q.05_peak_34004	chr5	52471638	52472190
2_wt.q.05_peak_43987	chr9	45985007	45985298
2_wt.q.05_peak_28201	chr3	35931631	35932474
2_wt.q.05_peak_22052	chr18	57877913	57878720
2_wt.q.05_peak_8882	chr12	4233353	4234692
2_wt.q.05_peak_899	chr1	54250165	54250627
2_wt.q.05_peak_37095	chr6	85587278	85588572
2_wt.q.05_peak_29243	chr3	94974382	94975188
2_wt.q.05_peak_25933	chr2	91963670	91964330
2_wt.q.05_peak_11015	chr12	119235959	119239336
2_wt.q.05_peak_29518	chr3	106721132	106723008
2_wt.q.05_peak_14811	chr14	78537144	78537700
2_wt.q.05_peak_18744	chr16	59471842	59472358
2_wt.q.05_peak_41640	chr8	45507489	45507975
2_wt.q.05_peak_5111	chr10	89731437	89733186
2_wt.q.05_peak_32723	chr4	135352807	135354108
2_wt.q.05_peak_45798	chr9	124423356	124425931
2_wt.q.05_peak_36287	chr6	31214795	31221121
2_wt.q.05_peak_27452	chr2	157914010	157915364
2_wt.q.05_peak_41273	chr8	22858377	22859014
2_wt.q.05_peak_38809	chr7	29767358	29769194
2_wt.q.05_peak_16173	chr15	44746042	44749652
2_wt.q.05_peak_14588	chr14	70456594	70457398
2_wt.q.05_peak_29517	chr3	106684989	106685939
2_wt.q.05_peak_14148	chr14	52103610	52104634
2_wt.q.05_peak_38791	chr7	29155366	29156514
2_wt.q.05_peak_38027	chr6	125008302	125009300
2_wt.q.05_peak_43998	chr9	46282544	46283416
2_wt.q.05_peak_11001	chr12	118300313	118300882
2_wt.q.05_peak_35884	chr6	7692009	7693681
2_wt.q.05_peak_17509	chr15	102405270	102406246
2_wt.q.05_peak_21573	chr18	35560734	35564683
2_wt.q.05_peak_17960	chr16	20628734	20629482
2_wt.q.05_peak_23550	chr19	43439176	43440004
2_wt.q.05_peak_20023	chr17	36031755	36032171
2_wt.q.05_peak_31064	chr4	41348238	41349233
2_wt.q.05_peak_25445	chr2	69723405	69723893
2_wt.q.05_peak_2160	chr1	135284103	135284415
2_wt.q.05_peak_42012	chr8	67973145	67974505
2_wt.q.05_peak_46169	chrX	106011399	106012425
2_wt.q.05_peak_16533	chr15	66891040	66891365
2_wt.q.05_peak_22656	chr18	84085902	84086816
2_wt.q.05_peak_6025	chr10	128231266	128232805
2_wt.q.05_peak_31090	chr4	43000370	43001178
2_wt.q.05_peak_32537	chr4	129334707	129336615
2_wt.q.05_peak_21523	chr18	34623898	34624889
2_wt.q.05_peak_23695	chr19	47136782	47138707
2_wt.q.05_peak_25942	chr2	92191290	92192254
2_wt.q.05_peak_6822	chr11	44470226	44471970
2_wt.q.05_peak_44957	chr9	89908898	89909382
2_wt.q.05_peak_28591	chr3	61362705	61368008
2_wt.q.05_peak_12923	chr13	98262725	98264514
2_wt.q.05_peak_23931	chr19	60226258	60226617
2_wt.q.05_peak_6035	chr10	128498690	128499835
2_wt.q.05_peak_4446	chr10	56228441	56229204
2_wt.q.05_peak_31063	chr4	41313779	41315414
2_wt.q.05_peak_19674	chr17	24527117	24528876
2_wt.q.05_peak_40561	chr7	123368453	123370236
2_wt.q.05_peak_12345	chr13	74316714	74317833
2_wt.q.05_peak_3431	chr1	191906358	191907007
2_wt.q.05_peak_21156	chr18	12120839	12122187
2_wt.q.05_peak_38053	chr6	126645165	126646416
2_wt.q.05_peak_12578	chr13	84221985	84222823
2_wt.q.05_peak_35533	chr5	137046318	137046819
2_wt.q.05_peak_15912	chr15	35155337	35156270
2_wt.q.05_peak_4949	chr10	80825721	80827096
2_wt.q.05_peak_17518	chr15	102517036	102519002
2_wt.q.05_peak_9171	chr12	24830813	24831766
2_wt.q.05_peak_29335	chr3	96629421	96630537
2_wt.q.05_peak_27281	chr2	152225756	152229111
2_wt.q.05_peak_33017	chr4	150855023	150855621
2_wt.q.05_peak_13616	chr14	20388543	20389302
2_wt.q.05_peak_13917	chr14	31829004	31830682
2_wt.q.05_peak_38431	chr6	149409060	149410098
2_wt.q.05_peak_22264	chr18	65430379	65431515
2_wt.q.05_peak_22933	chr19	8712739	8713296
2_wt.q.05_peak_555	chr1	37863628	37865935
2_wt.q.05_peak_8821	chr11	120932279	120933213
2_wt.q.05_peak_9261	chr12	29526497	29531955
2_wt.q.05_peak_17193	chr15	92050878	92052970
2_wt.q.05_peak_36146	chr6	28133096	28136059
2_wt.q.05_peak_21640	chr18	37643943	37644529
2_wt.q.05_peak_22844	chr19	5845237	5845670
2_wt.q.05_peak_44340	chr9	59353503	59353836
2_wt.q.05_peak_40554	chr7	123123860	123125706
2_wt.q.05_peak_7334	chr11	68852593	68853838
2_wt.q.05_peak_12706	chr13	92529715	92531552
2_wt.q.05_peak_25855	chr2	90744870	90746505
2_wt.q.05_peak_36082	chr6	21948819	21950633
2_wt.q.05_peak_22887	chr19	7055371	7056503
2_wt.q.05_peak_17561	chr16	4211646	4213175
2_wt.q.05_peak_19491	chr17	10319529	10321141
2_wt.q.05_peak_20785	chr17	83513878	83514830
2_wt.q.05_peak_25866	chr2	90903533	90905743
2_wt.q.05_peak_27531	chr2	163657823	163659724
2_wt.q.05_peak_13612	chr14	20082665	20083557
2_wt.q.05_peak_22832	chr19	5688690	5689915
2_wt.q.05_peak_133	chr1	12990528	12992980
2_wt.q.05_peak_23717	chr19	47865419	47866040
2_wt.q.05_peak_33744	chr5	35020197	35020972
2_wt.q.05_peak_35713	chr5	145203836	145205104
2_wt.q.05_peak_45018	chr9	95406579	95407591
2_wt.q.05_peak_20064	chr17	42876991	42877376
2_wt.q.05_peak_11564	chr13	32338834	32339204
2_wt.q.05_peak_21747	chr18	40255442	40261134
2_wt.q.05_peak_10034	chr12	73964186	73965074
2_wt.q.05_peak_4897	chr10	79746163	79747121
2_wt.q.05_peak_19362	chr17	3482434	3486490
2_wt.q.05_peak_40292	chr7	112427911	112428313
2_wt.q.05_peak_13617	chr14	20393397	20393979
2_wt.q.05_peak_5075	chr10	86779342	86779933
2_wt.q.05_peak_40116	chr7	101905511	101906195
2_wt.q.05_peak_36840	chr6	63256667	63257643
2_wt.q.05_peak_28608	chr3	63296293	63296714
2_wt.q.05_peak_7226	chr11	62549536	62551433
2_wt.q.05_peak_16304	chr15	53901246	53902756
2_wt.q.05_peak_1291	chr1	75262865	75265033
2_wt.q.05_peak_24735	chr2	34771257	34772277
2_wt.q.05_peak_38489	chr7	4915246	4916000
2_wt.q.05_peak_40599	chr7	125706703	125708510
2_wt.q.05_peak_37055	chr6	83571937	83572737
2_wt.q.05_peak_26487	chr2	119156419	119157504
2_wt.q.05_peak_29228	chr3	94412600	94413647
2_wt.q.05_peak_3596	chr10	5922483	5923654
2_wt.q.05_peak_27104	chr2	143544490	143548506
2_wt.q.05_peak_27013	chr2	139676579	139677801
2_wt.q.05_peak_42068	chr8	69790200	69791439
2_wt.q.05_peak_15998	chr15	37959425	37961928
2_wt.q.05_peak_12235	chr13	67359965	67360940
2_wt.q.05_peak_20131	chr17	46282401	46283265
2_wt.q.05_peak_19896	chr17	31511704	31512187
2_wt.q.05_peak_4822	chr10	75859657	75860616
2_wt.q.05_peak_11540	chr13	29986255	29986874
2_wt.q.05_peak_3264	chr1	181143730	181145441
2_wt.q.05_peak_11452	chr13	23738191	23740603
2_wt.q.05_peak_41596	chr8	40633499	40634792
2_wt.q.05_peak_873	chr1	53706696	53707106
2_wt.q.05_peak_24497	chr2	26444562	26447042
2_wt.q.05_peak_30791	chr4	21775603	21776894
2_wt.q.05_peak_4831	chr10	76237530	76238148
2_wt.q.05_peak_16909	chr15	79773629	79775953
2_wt.q.05_peak_13583	chr14	18270750	18271703
2_wt.q.05_peak_17007	chr15	82354436	82354716
2_wt.q.05_peak_43164	chr8	128358019	128360943
2_wt.q.05_peak_5883	chr10	121476424	121477074
2_wt.q.05_peak_11656	chr13	38036618	38037648
2_wt.q.05_peak_28291	chr3	41562898	41565189
2_wt.q.05_peak_38785	chr7	28961430	28962734
2_wt.q.05_peak_29168	chr3	89322083	89322352
2_wt.q.05_peak_14149	chr14	52196356	52197750
2_wt.q.05_peak_25492	chr2	71211440	71212506
2_wt.q.05_peak_11393	chr13	21749977	21751616
2_wt.q.05_peak_28605	chr3	62506526	62507356
2_wt.q.05_peak_14219	chr14	55642812	55643572
2_wt.q.05_peak_24553	chr2	29346371	29347180
2_wt.q.05_peak_31936	chr4	99193420	99194247
2_wt.q.05_peak_38560	chr7	16285593	16287071
2_wt.q.05_peak_21429	chr18	30272372	30273388
2_wt.q.05_peak_26552	chr2	120970362	120971131
2_wt.q.05_peak_12668	chr13	91387641	91389217
2_wt.q.05_peak_39501	chr7	75454987	75456700
2_wt.q.05_peak_40017	chr7	99483009	99484372
2_wt.q.05_peak_38815	chr7	29905778	29907234
2_wt.q.05_peak_27255	chr2	151008507	151009065
2_wt.q.05_peak_33833	chr5	39603652	39604342
2_wt.q.05_peak_26407	chr2	116063766	116064100
2_wt.q.05_peak_23645	chr19	46304430	46304806
2_wt.q.05_peak_34860	chr5	110107458	110108862
2_wt.q.05_peak_28439	chr3	53863446	53864380
2_wt.q.05_peak_42879	chr8	111940150	111941193
2_wt.q.05_peak_18367	chr16	36040519	36041815
2_wt.q.05_peak_24448	chr2	24047777	24049859
2_wt.q.05_peak_13118	chr13	105054285	105055560
2_wt.q.05_peak_38756	chr7	28169038	28170438
2_wt.q.05_peak_43202	chr9	4794595	4796845
2_wt.q.05_peak_24305	chr2	16355040	16357581
2_wt.q.05_peak_28154	chr3	33082736	33083695
2_wt.q.05_peak_1144	chr1	65186019	65187350
2_wt.q.05_peak_17364	chr15	98933302	98935342
2_wt.q.05_peak_1267	chr1	74600871	74601812
2_wt.q.05_peak_8699	chr11	116842441	116844490
2_wt.q.05_peak_38394	chr6	147042487	147043766
2_wt.q.05_peak_13952	chr14	34309954	34310794
2_wt.q.05_peak_40869	chr7	140856396	140857281
2_wt.q.05_peak_8987	chr12	8973585	8974606
2_wt.q.05_peak_24786	chr2	37451597	37452328
2_wt.q.05_peak_21618	chr18	36559366	36562176
2_wt.q.05_peak_42455	chr8	86623445	86625056
2_wt.q.05_peak_34762	chr5	104021733	104022139
2_wt.q.05_peak_2762	chr1	162547932	162549928
2_wt.q.05_peak_23523	chr19	41848157	41849015
2_wt.q.05_peak_26644	chr2	125783385	125783904
2_wt.q.05_peak_28247	chr3	38483762	38485490
2_wt.q.05_peak_26739	chr2	130284232	130284714
2_wt.q.05_peak_4193	chr10	39730886	39731859
2_wt.q.05_peak_45044	chr9	96258983	96260223
2_wt.q.05_peak_7905	chr11	87662308	87663373
2_wt.q.05_peak_31215	chr4	48473069	48474064
2_wt.q.05_peak_43980	chr9	45828405	45829299
2_wt.q.05_peak_32960	chr4	149484203	149486452
2_wt.q.05_peak_40865	chr7	140821387	140822102
2_wt.q.05_peak_12997	chr13	100730225	100731251
2_wt.q.05_peak_16682	chr15	73060514	73061397
2_wt.q.05_peak_38464	chr7	3692542	3694565
2_wt.q.05_peak_38430	chr6	149308999	149310586
2_wt.q.05_peak_34565	chr5	92137279	92138250
2_wt.q.05_peak_43020	chr8	123101923	123102270
2_wt.q.05_peak_33739	chr5	34761002	34763447
2_wt.q.05_peak_18239	chr16	32877320	32877673
2_wt.q.05_peak_18720	chr16	57121070	57123439
2_wt.q.05_peak_33505	chr5	23842958	23844945
2_wt.q.05_peak_32609	chr4	132274050	132275101
2_wt.q.05_peak_19749	chr17	26203065	26203734
2_wt.q.05_peak_16327	chr15	55071491	55072761
2_wt.q.05_peak_31306	chr4	56801736	56802896
2_wt.q.05_peak_40364	chr7	116333841	116334838
2_wt.q.05_peak_11874	chr13	46501160	46503436
2_wt.q.05_peak_23033	chr19	12501720	12502368
2_wt.q.05_peak_15995	chr15	37790464	37792233
2_wt.q.05_peak_2244	chr1	137965729	137966160
2_wt.q.05_peak_20317	chr17	57010755	57012155
2_wt.q.05_peak_45910	chrX	36903299	36904021
2_wt.q.05_peak_14587	chr14	70442967	70444179
2_wt.q.05_peak_19522	chr17	12118755	12121020
2_wt.q.05_peak_40916	chr7	144175931	144176545
2_wt.q.05_peak_44215	chr9	54980399	54980673
2_wt.q.05_peak_10374	chr12	86078694	86079849
2_wt.q.05_peak_43187	chr9	4308708	4310721
2_wt.q.05_peak_23467	chr19	37375558	37376775
2_wt.q.05_peak_22987	chr19	10576559	10577421
2_wt.q.05_peak_15422	chr15	3581897	3583489
2_wt.q.05_peak_20176	chr17	47924834	47925274
2_wt.q.05_peak_25543	chr2	73213774	73214274
2_wt.q.05_peak_15901	chr15	34494661	34495743
2_wt.q.05_peak_11443	chr13	23570279	23573253
2_wt.q.05_peak_35735	chr5	146963297	146963783
2_wt.q.05_peak_40367	chr7	116503765	116504949
2_wt.q.05_peak_38402	chr6	148212142	148213055
2_wt.q.05_peak_36202	chr6	29467713	29468291
2_wt.q.05_peak_46208	chrX	134600070	134601947
2_wt.q.05_peak_27260	chr2	151541930	151542500
2_wt.q.05_peak_35574	chr5	139149171	139150364
2_wt.q.05_peak_12410	chr13	77708265	77708950
2_wt.q.05_peak_1727	chr1	99772341	99774734
2_wt.q.05_peak_46261	chrX	151520286	151521728
2_wt.q.05_peak_38983	chr7	44848653	44850269
2_wt.q.05_peak_42777	chr8	107095044	107096884
2_wt.q.05_peak_22970	chr19	9979823	9980413
2_wt.q.05_peak_42851	chr8	111259030	111259605
2_wt.q.05_peak_21119	chr18	10029196	10029846
2_wt.q.05_peak_30653	chr4	11963824	11967847
2_wt.q.05_peak_7841	chr11	86543702	86545598
2_wt.q.05_peak_14202	chr14	55106304	55107462
2_wt.q.05_peak_29660	chr3	115887133	115889127
2_wt.q.05_peak_10776	chr12	105783779	105784468
2_wt.q.05_peak_33644	chr5	31697342	31698436
2_wt.q.05_peak_23320	chr19	29101023	29102077
2_wt.q.05_peak_38459	chr7	3644073	3645524
2_wt.q.05_peak_40840	chr7	139388345	139389692
2_wt.q.05_peak_16413	chr15	59647453	59649315
2_wt.q.05_peak_15886	chr15	34082036	34084653
2_wt.q.05_peak_41799	chr8	54953524	54955348
2_wt.q.05_peak_6634	chr11	34833402	34834252
2_wt.q.05_peak_26354	chr2	113848772	113849320
2_wt.q.05_peak_32216	chr4	116150022	116150433
2_wt.q.05_peak_4226	chr10	40682046	40684875
2_wt.q.05_peak_43356	chr9	21287160	21288417
2_wt.q.05_peak_22948	chr19	8839231	8840951
2_wt.q.05_peak_8229	chr11	100737881	100739282
2_wt.q.05_peak_23539	chr19	42255253	42257341
2_wt.q.05_peak_2369	chr1	146493319	146496061
2_wt.q.05_peak_12010	chr13	54611402	54612152
2_wt.q.05_peak_11582	chr13	34162706	34163559
2_wt.q.05_peak_10335	chr12	85151014	85151589
2_wt.q.05_peak_16866	chr15	79074890	79075458
2_wt.q.05_peak_7126	chr11	59201345	59203010
2_wt.q.05_peak_24297	chr2	14873597	14874683
2_wt.q.05_peak_4827	chr10	75935889	75937141
2_wt.q.05_peak_45366	chr9	108566636	108567964
2_wt.q.05_peak_33633	chr5	31240194	31240744
2_wt.q.05_peak_27679	chr2	170731465	170733098
2_wt.q.05_peak_12221	chr13	64369689	64370804
2_wt.q.05_peak_19982	chr17	34980836	34982082
2_wt.q.05_peak_22167	chr18	61640010	61641288
2_wt.q.05_peak_7324	chr11	68691537	68692377
2_wt.q.05_peak_41447	chr8	33653023	33654832
2_wt.q.05_peak_24479	chr2	25579985	25581436
2_wt.q.05_peak_22381	chr18	69343853	69346089
2_wt.q.05_peak_2475	chr1	153330535	153333788
2_wt.q.05_peak_26533	chr2	120563306	120564464
2_wt.q.05_peak_30535	chr4	3574385	3575178
2_wt.q.05_peak_34309	chr5	73292457	73294542
2_wt.q.05_peak_31795	chr4	88033013	88034276
2_wt.q.05_peak_27285	chr2	152332208	152332923
2_wt.q.05_peak_29473	chr3	103968414	103969626
2_wt.q.05_peak_25696	chr2	79634521	79635229
2_wt.q.05_peak_4166	chr10	37138652	37139474
2_wt.q.05_peak_45146	chr9	102835266	102836416
2_wt.q.05_peak_20133	chr17	46298515	46299245
2_wt.q.05_peak_37750	chr6	113604486	113606419
2_wt.q.05_peak_18512	chr16	42339744	42340484
2_wt.q.05_peak_22366	chr18	68299811	68300855
2_wt.q.05_peak_46181	chrX	112311240	112311887
2_wt.q.05_peak_29950	chr3	127837657	127838073
2_wt.q.05_peak_3826	chr10	17721727	17723709
2_wt.q.05_peak_34515	chr5	88719396	88720809
2_wt.q.05_peak_8274	chr11	101732922	101733450
2_wt.q.05_peak_22876	chr19	6920704	6922970
2_wt.q.05_peak_22989	chr19	10634689	10634992
2_wt.q.05_peak_33435	chr5	21645690	21646162
2_wt.q.05_peak_18644	chr16	50528316	50529985
2_wt.q.05_peak_37341	chr6	93912315	93913965
2_wt.q.05_peak_42526	chr8	92900339	92901203
2_wt.q.05_peak_23039	chr19	12795706	12797533
2_wt.q.05_peak_37980	chr6	122308137	122309539
2_wt.q.05_peak_24986	chr2	45110472	45115753
2_wt.q.05_peak_1866	chr1	119835831	119836887
2_wt.q.05_peak_39141	chr7	52005586	52006827
2_wt.q.05_peak_10108	chr12	75668929	75670444
2_wt.q.05_peak_17382	chr15	99294639	99294971
2_wt.q.05_peak_38827	chr7	30169118	30170616
2_wt.q.05_peak_6896	chr11	49202716	49204220
2_wt.q.05_peak_25772	chr2	83723794	83725785
2_wt.q.05_peak_43277	chr9	14784012	14785336
2_wt.q.05_peak_36953	chr6	72957889	72959542
2_wt.q.05_peak_33551	chr5	25499128	25500129
2_wt.q.05_peak_4140	chr10	34280820	34282031
2_wt.q.05_peak_35139	chr5	122372253	122372674
2_wt.q.05_peak_43325	chr9	20491577	20493833
2_wt.q.05_peak_31797	chr4	88093870	88095237
2_wt.q.05_peak_45155	chr9	103112598	103113353
2_wt.q.05_peak_31238	chr4	49845328	49846056
2_wt.q.05_peak_6903	chr11	49292648	49293183
2_wt.q.05_peak_17530	chr15	102720546	102723069
2_wt.q.05_peak_15521	chr15	11996127	11996387
2_wt.q.05_peak_24736	chr2	34772678	34773333
2_wt.q.05_peak_38811	chr7	29815204	29816428
2_wt.q.05_peak_25916	chr2	91710359	91711548
2_wt.q.05_peak_21120	chr18	10030281	10030806
2_wt.q.05_peak_7511	chr11	75170389	75171153
2_wt.q.05_peak_17833	chr16	15593515	15594913
2_wt.q.05_peak_27374	chr2	156143864	156144696
2_wt.q.05_peak_22526	chr18	76240598	76241801
2_wt.q.05_peak_46338	chrX	160993891	160995993
2_wt.q.05_peak_23664	chr19	46572607	46574646
2_wt.q.05_peak_26700	chr2	129129012	129130062
2_wt.q.05_peak_11605	chr13	35905425	35906444
2_wt.q.05_peak_3218	chr1	179517303	179517948
2_wt.q.05_peak_18669	chr16	52450003	52454337
2_wt.q.05_peak_30041	chr3	135438325	135438862
2_wt.q.05_peak_7810	chr11	84870945	84871843
2_wt.q.05_peak_17438	chr15	100303019	100305067
2_wt.q.05_peak_8473	chr11	106611714	106612886
2_wt.q.05_peak_22775	chr19	4510196	4510734
2_wt.q.05_peak_38466	chr7	3703545	3704774
2_wt.q.05_peak_19727	chr17	25823232	25823972
2_wt.q.05_peak_17815	chr16	13671171	13673126
2_wt.q.05_peak_39291	chr7	64393123	64393437
2_wt.q.05_peak_17361	chr15	98881068	98881796
2_wt.q.05_peak_24637	chr2	32235380	32237289
2_wt.q.05_peak_8247	chr11	101119409	101120390
2_wt.q.05_peak_23600	chr19	45013793	45014569
2_wt.q.05_peak_38026	chr6	124998039	124998949
2_wt.q.05_peak_35886	chr6	7845379	7846762
2_wt.q.05_peak_45959	chrX	48518711	48519330
2_wt.q.05_peak_29542	chr3	107332634	107334325
2_wt.q.05_peak_14605	chr14	70629086	70629571
2_wt.q.05_peak_1201	chr1	67038043	67039246
2_wt.q.05_peak_26733	chr2	130177068	130179792
2_wt.q.05_peak_38847	chr7	30558040	30560275
2_wt.q.05_peak_39964	chr7	97400147	97400639
2_wt.q.05_peak_19591	chr17	15499399	15499796
2_wt.q.05_peak_12158	chr13	60177181	60177974
2_wt.q.05_peak_24393	chr2	20520051	20520910
2_wt.q.05_peak_7294	chr11	67596001	67598746
2_wt.q.05_peak_3021	chr1	171287537	171288434
2_wt.q.05_peak_5854	chr10	119818794	119819287
2_wt.q.05_peak_3901	chr10	20722835	20726679
2_wt.q.05_peak_9486	chr12	40038202	40038518
2_wt.q.05_peak_45317	chr9	107770610	107770990
2_wt.q.05_peak_4105	chr10	31609719	31610409
2_wt.q.05_peak_1993	chr1	128243573	128246006
2_wt.q.05_peak_19088	chr16	84833877	84835629
2_wt.q.05_peak_34696	chr5	100498696	100500048
2_wt.q.05_peak_46109	chrX	95443969	95445141
2_wt.q.05_peak_18625	chr16	49698427	49700364
2_wt.q.05_peak_42105	chr8	70754494	70755066
2_wt.q.05_peak_41478	chr8	34965473	34966259
2_wt.q.05_peak_28185	chr3	34081090	34081577
2_wt.q.05_peak_21336	chr18	24019990	24020341
2_wt.q.05_peak_31608	chr4	80910473	80912298
2_wt.q.05_peak_26484	chr2	119046395	119047126
2_wt.q.05_peak_45834	chrX	12761843	12762854
2_wt.q.05_peak_28234	chr3	37312518	37314119
2_wt.q.05_peak_16752	chr15	75920955	75922111
2_wt.q.05_peak_8267	chr11	101665109	101665943
2_wt.q.05_peak_27435	chr2	156991450	156992018
2_wt.q.05_peak_125	chr1	12691543	12692255
2_wt.q.05_peak_1602	chr1	91297922	91298189
2_wt.q.05_peak_15900	chr15	34442754	34444000
2_wt.q.05_peak_10886	chr12	111537373	111538571
2_wt.q.05_peak_21123	chr18	10179261	10183039
2_wt.q.05_peak_35925	chr6	11925203	11926773
2_wt.q.05_peak_2826	chr1	165091704	165092272
2_wt.q.05_peak_30367	chr3	152346085	152346400
2_wt.q.05_peak_45269	chr9	106684760	106686863
2_wt.q.05_peak_33111	chr4	155563197	155564374
2_wt.q.05_peak_31031	chr4	40279544	40280039
2_wt.q.05_peak_37352	chr6	94283526	94284442
2_wt.q.05_peak_20703	chr17	80125924	80127715
2_wt.q.05_peak_4134	chr10	34018534	34019310
2_wt.q.05_peak_38422	chr6	148946032	148947094
2_wt.q.05_peak_13000	chr13	100832412	100833860
2_wt.q.05_peak_11793	chr13	44730655	44733286
2_wt.q.05_peak_14474	chr14	65837010	65837679
2_wt.q.05_peak_24621	chr2	31670420	31671115
2_wt.q.05_peak_35669	chr5	143757936	143758892
2_wt.q.05_peak_4894	chr10	79668957	79670050
2_wt.q.05_peak_11572	chr13	34002004	34003231
2_wt.q.05_peak_13632	chr14	20694457	20695555
2_wt.q.05_peak_26574	chr2	121358398	121358693
2_wt.q.05_peak_19969	chr17	34628848	34630201
2_wt.q.05_peak_31113	chr4	44012113	44013241
2_wt.q.05_peak_29209	chr3	90509192	90510231
2_wt.q.05_peak_32718	chr4	134922961	134924275
2_wt.q.05_peak_25819	chr2	85049672	85051447
2_wt.q.05_peak_1484	chr1	84935311	84936268
2_wt.q.05_peak_10823	chr12	108423349	108424255
2_wt.q.05_peak_19771	chr17	26676117	26677649
2_wt.q.05_peak_32613	chr4	132353116	132353887
2_wt.q.05_peak_5858	chr10	120112357	120113351
2_wt.q.05_peak_27351	chr2	155356857	155357929
2_wt.q.05_peak_45580	chr9	113792799	113793075
2_wt.q.05_peak_19545	chr17	12915507	12917317
2_wt.q.05_peak_16970	chr15	81360150	81360691
2_wt.q.05_peak_4578	chr10	63337766	63338309
2_wt.q.05_peak_35779	chr5	149048924	149053032
2_wt.q.05_peak_22761	chr19	4231113	4232246
2_wt.q.05_peak_32257	chr4	118178926	118180716
2_wt.q.05_peak_1143	chr1	65178565	65179237
2_wt.q.05_peak_31307	chr4	56862930	56866064
2_wt.q.05_peak_21863	chr18	45558340	45561566
2_wt.q.05_peak_16354	chr15	57911575	57913085
2_wt.q.05_peak_26526	chr2	120154120	120154469
2_wt.q.05_peak_39045	chr7	45896535	45897927
2_wt.q.05_peak_46323	chrX	160137454	160138389
2_wt.q.05_peak_22470	chr18	72350039	72351166
2_wt.q.05_peak_32505	chr4	128654018	128655104
2_wt.q.05_peak_13403	chr13	119789555	119790596
2_wt.q.05_peak_6966	chr11	51688474	51689870
2_wt.q.05_peak_2200	chr1	136346262	136346698
2_wt.q.05_peak_40221	chr7	111082753	111084360
2_wt.q.05_peak_10591	chr12	98627915	98628530
2_wt.q.05_peak_22756	chr19	4096838	4097930
2_wt.q.05_peak_32133	chr4	108847861	108848324
2_wt.q.05_peak_4629	chr10	67096630	67099214
2_wt.q.05_peak_19990	chr17	35164650	35166059
2_wt.q.05_peak_27741	chr2	180024040	180025536
2_wt.q.05_peak_7148	chr11	59839093	59840261
2_wt.q.05_peak_5288	chr10	95500936	95501964
2_wt.q.05_peak_43750	chr9	37613087	37614733
2_wt.q.05_peak_24368	chr2	19656978	19658071
2_wt.q.05_peak_22594	chr18	79110097	79110427
2_wt.q.05_peak_45364	chr9	108559643	108560334
2_wt.q.05_peak_12940	chr13	98890842	98891691
2_wt.q.05_peak_25409	chr2	68470776	68471691
2_wt.q.05_peak_40130	chr7	102759235	102759546
2_wt.q.05_peak_4082	chr10	30617783	30618445
2_wt.q.05_peak_35470	chr5	135008535	135010213
2_wt.q.05_peak_12841	chr13	96387555	96389018
2_wt.q.05_peak_11670	chr13	40999914	41001506
2_wt.q.05_peak_20275	chr17	55712086	55713119
2_wt.q.05_peak_44690	chr9	74975440	74976577
2_wt.q.05_peak_19707	chr17	25222776	25223578
2_wt.q.05_peak_41827	chr8	56294012	56294674
2_wt.q.05_peak_33622	chr5	31054410	31055352
2_wt.q.05_peak_37716	chr6	112946159	112947551
2_wt.q.05_peak_35525	chr5	136567929	136568595
2_wt.q.05_peak_34407	chr5	77310025	77310938
2_wt.q.05_peak_45597	chr9	114639613	114640598
2_wt.q.05_peak_7498	chr11	74897246	74898841
2_wt.q.05_peak_44399	chr9	61913936	61915094
2_wt.q.05_peak_1080	chr1	63114571	63115891
2_wt.q.05_peak_24274	chr2	13543687	13545095
2_wt.q.05_peak_11394	chr13	21753151	21755020
2_wt.q.05_peak_21673	chr18	38249672	38250569
2_wt.q.05_peak_1934	chr1	125560575	125560862
2_wt.q.05_peak_26041	chr2	97466087	97469757
2_wt.q.05_peak_33700	chr5	33782367	33783326
2_wt.q.05_peak_9825	chr12	64918488	64919051
2_wt.q.05_peak_33853	chr5	41843668	41844685
2_wt.q.05_peak_33625	chr5	31093573	31094815
2_wt.q.05_peak_6905	chr11	49326844	49327381
2_wt.q.05_peak_21279	chr18	21299909	21300524
2_wt.q.05_peak_38308	chr6	142963978	142965157
2_wt.q.05_peak_18950	chr16	74410808	74411999
2_wt.q.05_peak_22611	chr18	80470136	80470575
2_wt.q.05_peak_2774	chr1	163929331	163930030
2_wt.q.05_peak_21114	chr18	9450240	9450798
2_wt.q.05_peak_34172	chr5	65491582	65493723
2_wt.q.05_peak_18899	chr16	70313910	70314907
2_wt.q.05_peak_12233	chr13	67306044	67306865
2_wt.q.05_peak_31493	chr4	70534631	70536044
2_wt.q.05_peak_40698	chr7	128611900	128612347
2_wt.q.05_peak_17317	chr15	96699734	96700342
2_wt.q.05_peak_39643	chr7	82648123	82649372
2_wt.q.05_peak_45839	chrX	13070375	13071287
2_wt.q.05_peak_33582	chr5	28316309	28317113
2_wt.q.05_peak_19571	chr17	14204096	14205025
2_wt.q.05_peak_10588	chr12	98574121	98574675
2_wt.q.05_peak_5990	chr10	127310984	127312706
2_wt.q.05_peak_46010	chrX	70385347	70386323
2_wt.q.05_peak_1817	chr1	109981576	109983557
2_wt.q.05_peak_28641	chr3	65666902	65667219
2_wt.q.05_peak_29289	chr3	95855809	95856496
2_wt.q.05_peak_45414	chr9	110531608	110533214
2_wt.q.05_peak_23643	chr19	46075420	46076443
2_wt.q.05_peak_34885	chr5	110839555	110840176
2_wt.q.05_peak_12030	chr13	55105032	55105696
2_wt.q.05_peak_19820	chr17	28620771	28622398
2_wt.q.05_peak_21828	chr18	43393159	43393766
2_wt.q.05_peak_7340	chr11	69015560	69016301
2_wt.q.05_peak_18711	chr16	56028138	56030792
2_wt.q.05_peak_23434	chr19	36918660	36919868
2_wt.q.05_peak_19697	chr17	25014565	25015090
2_wt.q.05_peak_1425	chr1	82724498	82725877
2_wt.q.05_peak_39358	chr7	66839283	66840004
2_wt.q.05_peak_46005	chrX	69360813	69361634
2_wt.q.05_peak_21016	chr17	94834503	94834815
2_wt.q.05_peak_29343	chr3	96904689	96905805
2_wt.q.05_peak_28774	chr3	73708033	73708406
2_wt.q.05_peak_24281	chr2	14073206	14074071
2_wt.q.05_peak_42397	chr8	85082714	85084050
2_wt.q.05_peak_19925	chr17	32965209	32966044
2_wt.q.05_peak_17592	chr16	4963274	4964910
2_wt.q.05_peak_23494	chr19	40588028	40589692
2_wt.q.05_peak_25448	chr2	69789024	69789557
2_wt.q.05_peak_38478	chr7	4684549	4685281
2_wt.q.05_peak_8048	chr11	95666130	95667530
2_wt.q.05_peak_2752	chr1	161968888	161969553
2_wt.q.05_peak_32983	chr4	150236307	150238966
2_wt.q.05_peak_42331	chr8	84249339	84250092
2_wt.q.05_peak_14283	chr14	60250386	60250827
2_wt.q.05_peak_16171	chr15	44705904	44706741
2_wt.q.05_peak_37649	chr6	108658773	108664400
2_wt.q.05_peak_32925	chr4	148159640	148161155
2_wt.q.05_peak_31943	chr4	101069094	101070180
2_wt.q.05_peak_19456	chr17	8527431	8527784
2_wt.q.05_peak_27247	chr2	150786475	150788144
2_wt.q.05_peak_8019	chr11	94326760	94329620
2_wt.q.05_peak_24575	chr2	30093726	30094555
2_wt.q.05_peak_7397	chr11	70015060	70016135
2_wt.q.05_peak_19688	chr17	24849719	24850903
2_wt.q.05_peak_33062	chr4	152476123	152479423
2_wt.q.05_peak_34598	chr5	96162754	96163073
2_wt.q.05_peak_22988	chr19	10605306	10606152
2_wt.q.05_peak_29164	chr3	89281425	89282079
2_wt.q.05_peak_3703	chr10	11148904	11150528
2_wt.q.05_peak_4912	chr10	80114754	80115673
2_wt.q.05_peak_31218	chr4	48584441	48584874
2_wt.q.05_peak_2777	chr1	163994544	163995277
2_wt.q.05_peak_43289	chr9	15357086	15358500
2_wt.q.05_peak_3942	chr10	21992491	21993708
2_wt.q.05_peak_35531	chr5	136987038	136987984
2_wt.q.05_peak_8560	chr11	109649562	109651136
2_wt.q.05_peak_3295	chr1	182341375	182342092
2_wt.q.05_peak_7553	chr11	76217003	76217890
2_wt.q.05_peak_17958	chr16	20547932	20548847
2_wt.q.05_peak_13797	chr14	27622081	27622762
2_wt.q.05_peak_33838	chr5	39644829	39645964
2_wt.q.05_peak_34434	chr5	81020842	81021552
2_wt.q.05_peak_17325	chr15	97705864	97706210
2_wt.q.05_peak_17905	chr16	18053066	18053838
2_wt.q.05_peak_38132	chr6	134829589	134831377
2_wt.q.05_peak_45431	chr9	111270848	111272155
2_wt.q.05_peak_38652	chr7	24133776	24134399
2_wt.q.05_peak_19030	chr16	78300962	78303550
2_wt.q.05_peak_6913	chr11	49712535	49713485
2_wt.q.05_peak_26508	chr2	119787059	119788229
2_wt.q.05_peak_21614	chr18	36348848	36349670
2_wt.q.05_peak_10630	chr12	100185845	100188245
2_wt.q.05_peak_26161	chr2	103760653	103761239
2_wt.q.05_peak_14237	chr14	57398463	57398992
2_wt.q.05_peak_23559	chr19	43523551	43525221
2_wt.q.05_peak_3430	chr1	191905610	191906034
2_wt.q.05_peak_46151	chrX	103493659	103493988
2_wt.q.05_peak_5283	chr10	95323458	95324543
2_wt.q.05_peak_6931	chr11	50290439	50293109
2_wt.q.05_peak_36151	chr6	28421316	28422308
2_wt.q.05_peak_42077	chr8	70138599	70140082
2_wt.q.05_peak_1422	chr1	82316115	82317034
2_wt.q.05_peak_8261	chr11	101467201	101467946
2_wt.q.05_peak_14078	chr14	47297714	47298145
2_wt.q.05_peak_29835	chr3	123267239	123268208
2_wt.q.05_peak_1128	chr1	64615653	64618289
2_wt.q.05_peak_45749	chr9	122351798	122352404
2_wt.q.05_peak_25064	chr2	50295787	50297240
2_wt.q.05_peak_33134	chr5	3595916	3596852
2_wt.q.05_peak_37960	chr6	120835738	120837001
2_wt.q.05_peak_8276	chr11	101784957	101785670
2_wt.q.05_peak_41587	chr8	40511446	40512212
2_wt.q.05_peak_21495	chr18	33460756	33465530
2_wt.q.05_peak_34749	chr5	103211738	103212101
2_wt.q.05_peak_37976	chr6	121183422	121183783
2_wt.q.05_peak_37421	chr6	99027139	99028863
2_wt.q.05_peak_35642	chr5	142905573	142907950
2_wt.q.05_peak_31371	chr4	62286615	62287416
2_wt.q.05_peak_14221	chr14	55659811	55660648
2_wt.q.05_peak_12335	chr13	73603721	73604259
2_wt.q.05_peak_20124	chr17	45573345	45574923
2_wt.q.05_peak_18536	chr16	43889225	43890316
2_wt.q.05_peak_32089	chr4	106910379	106910926
2_wt.q.05_peak_19426	chr17	5975327	5977074
2_wt.q.05_peak_18229	chr16	32608289	32609240
2_wt.q.05_peak_7497	chr11	74895606	74896589
2_wt.q.05_peak_15038	chr14	102982735	102983334
2_wt.q.05_peak_32108	chr4	107889568	107890137
2_wt.q.05_peak_29508	chr3	105704242	105707251
2_wt.q.05_peak_44487	chr9	65345612	65346001
2_wt.q.05_peak_20859	chr17	87025574	87025835
2_wt.q.05_peak_1709	chr1	98048392	98048902
2_wt.q.05_peak_32420	chr4	126201391	126203539
2_wt.q.05_peak_33497	chr5	23614562	23617462
2_wt.q.05_peak_4570	chr10	63021262	63025288
2_wt.q.05_peak_38589	chr7	16875852	16876282
2_wt.q.05_peak_19361	chr17	3481785	3482073
2_wt.q.05_peak_25659	chr2	77945569	77946624
2_wt.q.05_peak_11890	chr13	46930006	46931090
2_wt.q.05_peak_11002	chr12	118301167	118302712
2_wt.q.05_peak_22921	chr19	7494580	7496138
2_wt.q.05_peak_30071	chr3	136669552	136671004
2_wt.q.05_peak_9925	chr12	70109386	70112007
2_wt.q.05_peak_9323	chr12	30584060	30585112
2_wt.q.05_peak_25922	chr2	91921949	91922308
2_wt.q.05_peak_26270	chr2	109692311	109695224
2_wt.q.05_peak_26408	chr2	116064618	116067443
2_wt.q.05_peak_22719	chr18	88971484	88971957
2_wt.q.05_peak_38373	chr6	146575907	146581483
2_wt.q.05_peak_26302	chr2	110947647	110950898
2_wt.q.05_peak_35228	chr5	124112570	124113149
2_wt.q.05_peak_838	chr1	52232850	52234254
2_wt.q.05_peak_20440	chr17	66077477	66078363
2_wt.q.05_peak_46233	chrX	140956339	140957644
2_wt.q.05_peak_36330	chr6	33058980	33060738
2_wt.q.05_peak_27812	chr3	5575520	5576184
2_wt.q.05_peak_22170	chr18	61688456	61689215
2_wt.q.05_peak_11223	chr13	14062423	14064214
2_wt.q.05_peak_44941	chr9	88437303	88439871
2_wt.q.05_peak_38770	chr7	28766102	28767316
2_wt.q.05_peak_14099	chr14	47663718	47664870
2_wt.q.05_peak_32212	chr4	116053498	116053783
2_wt.q.05_peak_42544	chr8	94097813	94099133
2_wt.q.05_peak_21050	chr18	5334159	5334798
2_wt.q.05_peak_13337	chr13	114818271	114818568
2_wt.q.05_peak_6620	chr11	32532739	32533507
2_wt.q.05_peak_6097	chr11	4095707	4096618
2_wt.q.05_peak_15577	chr15	13171207	13174754
2_wt.q.05_peak_12008	chr13	54589301	54591082
2_wt.q.05_peak_2880	chr1	167391781	167394579
2_wt.q.05_peak_40635	chr7	126884511	126885720
2_wt.q.05_peak_28675	chr3	68570169	68572700
2_wt.q.05_peak_26767	chr2	131159694	131161182
2_wt.q.05_peak_17551	chr16	3908365	3909380
2_wt.q.05_peak_40224	chr7	111122420	111123239
2_wt.q.05_peak_39759	chr7	89632835	89634317
2_wt.q.05_peak_14051	chr14	45318701	45319312
2_wt.q.05_peak_1708	chr1	98046303	98048106
2_wt.q.05_peak_33698	chr5	33651512	33652650
2_wt.q.05_peak_28936	chr3	81932539	81933165
2_wt.q.05_peak_16983	chr15	81855793	81860029
2_wt.q.05_peak_37032	chr6	81965179	81966459
2_wt.q.05_peak_8555	chr11	109472368	109473583
2_wt.q.05_peak_8184	chr11	98808867	98810255
2_wt.q.05_peak_1284	chr1	75168428	75169607
2_wt.q.05_peak_1994	chr1	128359565	128361097
2_wt.q.05_peak_32397	chr4	124881286	124881607
2_wt.q.05_peak_31325	chr4	57301313	57302654
2_wt.q.05_peak_11818	chr13	45507038	45508156
2_wt.q.05_peak_16328	chr15	55089805	55091080
2_wt.q.05_peak_36942	chr6	72413855	72414681
2_wt.q.05_peak_24091	chr2	6927424	6928547
2_wt.q.05_peak_9718	chr12	54655618	54657354
2_wt.q.05_peak_7114	chr11	58330111	58330631
2_wt.q.05_peak_43217	chr9	8004450	8005204
2_wt.q.05_peak_8210	chr11	100320017	100321129
2_wt.q.05_peak_17799	chr16	13357430	13358656
2_wt.q.05_peak_44951	chr9	89736706	89738701
2_wt.q.05_peak_11453	chr13	23745057	23747813
2_wt.q.05_peak_7186	chr11	61174614	61175624
2_wt.q.05_peak_39262	chr7	63444991	63446084
2_wt.q.05_peak_11907	chr13	48625321	48625975
2_wt.q.05_peak_22181	chr18	62179545	62180776
2_wt.q.05_peak_29948	chr3	127780147	127780838
2_wt.q.05_peak_11448	chr13	23620467	23623444
2_wt.q.05_peak_13754	chr14	25457533	25459620
2_wt.q.05_peak_42839	chr8	110996868	110998496
2_wt.q.05_peak_44540	chr9	66592772	66593393
2_wt.q.05_peak_6338	chr11	21090946	21091560
2_wt.q.05_peak_30606	chr4	8535097	8535582
2_wt.q.05_peak_15110	chr14	105497529	105498609
2_wt.q.05_peak_22857	chr19	6235547	6237151
2_wt.q.05_peak_32404	chr4	125085193	125085756
2_wt.q.05_peak_8118	chr11	97840119	97841563
2_wt.q.05_peak_27123	chr2	143914874	143916403
2_wt.q.05_peak_20307	chr17	56583774	56585233
2_wt.q.05_peak_14079	chr14	47298849	47299560
2_wt.q.05_peak_41453	chr8	34107724	34109070
2_wt.q.05_peak_33937	chr5	45855123	45858368
2_wt.q.05_peak_3270	chr1	181351940	181352528
2_wt.q.05_peak_19643	chr17	23550406	23551056
2_wt.q.05_peak_44279	chr9	57605029	57605634
2_wt.q.05_peak_727	chr1	44218734	44219451
2_wt.q.05_peak_19691	chr17	24895166	24895595
2_wt.q.05_peak_38457	chr7	3616980	3618399
2_wt.q.05_peak_8874	chr12	4037218	4039152
2_wt.q.05_peak_19942	chr17	33809764	33811267
2_wt.q.05_peak_45314	chr9	107580420	107581255
2_wt.q.05_peak_8476	chr11	106778734	106780020
2_wt.q.05_peak_4802	chr10	75036655	75037107
2_wt.q.05_peak_42145	chr8	71950949	71951315
2_wt.q.05_peak_43501	chr9	27154614	27155896
2_wt.q.05_peak_34269	chr5	71699691	71701359
2_wt.q.05_peak_35579	chr5	139214197	139215313
2_wt.q.05_peak_41684	chr8	46210770	46211511
2_wt.q.05_peak_46259	chrX	151343324	151344650
2_wt.q.05_peak_33673	chr5	32854421	32854741
2_wt.q.05_peak_43211	chr9	7763346	7764522
2_wt.q.05_peak_2517	chr1	154726308	154726743
2_wt.q.05_peak_6944	chr11	50887770	50888087
2_wt.q.05_peak_3950	chr10	22644592	22645217
2_wt.q.05_peak_19685	chr17	24707164	24708514
2_wt.q.05_peak_19546	chr17	12960419	12961131
2_wt.q.05_peak_38952	chr7	43443316	43444312
2_wt.q.05_peak_33454	chr5	22549677	22550882
2_wt.q.05_peak_20130	chr17	46253467	46254116
2_wt.q.05_peak_42602	chr8	95807542	95808456
2_wt.q.05_peak_7380	chr11	69670484	69673039
2_wt.q.05_peak_24664	chr2	32775437	32776103
2_wt.q.05_peak_28844	chr3	79628519	79629703
2_wt.q.05_peak_3593	chr10	5822731	5825274
2_wt.q.05_peak_7625	chr11	78496623	78497034
2_wt.q.05_peak_34909	chr5	112228485	112229460
2_wt.q.05_peak_38028	chr6	125038356	125040438
2_wt.q.05_peak_38134	chr6	134897919	134898813
2_wt.q.05_peak_42414	chr8	85554150	85554827
2_wt.q.05_peak_45802	chrX	7574400	7575168
2_wt.q.05_peak_3538	chr1	194939240	194939670
2_wt.q.05_peak_10628	chr12	100159218	100159692
2_wt.q.05_peak_3199	chr1	178318024	178320759
2_wt.q.05_peak_10647	chr12	100276643	100277370
2_wt.q.05_peak_32598	chr4	131872834	131874628
2_wt.q.05_peak_11456	chr13	23760647	23761161
2_wt.q.05_peak_29305	chr3	96057465	96058470
2_wt.q.05_peak_7541	chr11	75678721	75680148
2_wt.q.05_peak_38772	chr7	28808788	28811999
2_wt.q.05_peak_37362	chr6	94699805	94700955
2_wt.q.05_peak_29171	chr3	89411464	89412465
2_wt.q.05_peak_43721	chr9	37208144	37208677
2_wt.q.05_peak_6497	chr11	29171709	29173660
2_wt.q.05_peak_34516	chr5	88764473	88765813
2_wt.q.05_peak_27624	chr2	167062797	167065215
2_wt.q.05_peak_24489	chr2	25983316	25984368
2_wt.q.05_peak_11973	chr13	52979594	52981068
2_wt.q.05_peak_41925	chr8	64731972	64734376
2_wt.q.05_peak_10927	chr12	113014040	113014334
2_wt.q.05_peak_18372	chr16	36874153	36875401
2_wt.q.05_peak_14408	chr14	64415058	64419429
2_wt.q.05_peak_40852	chr7	140115637	140116620
2_wt.q.05_peak_39024	chr7	45395430	45395900
2_wt.q.05_peak_29825	chr3	122620025	122621004
2_wt.q.05_peak_17556	chr16	4077261	4078262
2_wt.q.05_peak_26226	chr2	106695838	106696229
2_wt.q.05_peak_31030	chr4	40268098	40270464
2_wt.q.05_peak_38714	chr7	27231972	27233462
2_wt.q.05_peak_13542	chr14	16248685	16249861
2_wt.q.05_peak_29491	chr3	104637953	104639818
2_wt.q.05_peak_42422	chr8	85839803	85841978
2_wt.q.05_peak_18091	chr16	27388121	27388410
2_wt.q.05_peak_715	chr1	43933197	43933875
2_wt.q.05_peak_6108	chr11	4593532	4595174
2_wt.q.05_peak_2453	chr1	152750209	152750867
2_wt.q.05_peak_23352	chr19	31663816	31666033
2_wt.q.05_peak_6886	chr11	48816527	48818456
2_wt.q.05_peak_40633	chr7	126861957	126862595
2_wt.q.05_peak_9334	chr12	31633973	31634389
2_wt.q.05_peak_18245	chr16	33055637	33057751
2_wt.q.05_peak_44899	chr9	86467374	86467673
2_wt.q.05_peak_30199	chr3	141463995	141467504
2_wt.q.05_peak_33614	chr5	30907328	30908224
2_wt.q.05_peak_6330	chr11	20829992	20830455
2_wt.q.05_peak_33594	chr5	29735455	29736909
2_wt.q.05_peak_18708	chr16	55973240	55974202
2_wt.q.05_peak_8532	chr11	108343627	108344236
2_wt.q.05_peak_42313	chr8	83699274	83699717
2_wt.q.05_peak_27554	chr2	164785257	164785717
2_wt.q.05_peak_33208	chr5	8621518	8623378
2_wt.q.05_peak_30384	chr3	152668439	152668975
2_wt.q.05_peak_15267	chr14	119099547	119100427
2_wt.q.05_peak_621	chr1	39648712	39651756
2_wt.q.05_peak_38849	chr7	30588828	30589602
2_wt.q.05_peak_16052	chr15	39796607	39797426
2_wt.q.05_peak_39749	chr7	89516335	89517138
2_wt.q.05_peak_11397	chr13	21783483	21784720
2_wt.q.05_peak_44887	chr9	85841552	85842159
2_wt.q.05_peak_45115	chr9	100642597	100643736
2_wt.q.05_peak_29638	chr3	110143032	110143346
2_wt.q.05_peak_38732	chr7	27552525	27553673
2_wt.q.05_peak_1995	chr1	128416751	128417063
2_wt.q.05_peak_41352	chr8	25840279	25841680
2_wt.q.05_peak_25810	chr2	84826648	84827769
2_wt.q.05_peak_21161	chr18	12643207	12644227
2_wt.q.05_peak_19838	chr17	29007712	29008587
2_wt.q.05_peak_28053	chr3	26330834	26332192
2_wt.q.05_peak_8896	chr12	4842822	4844022
2_wt.q.05_peak_39954	chr7	96951154	96951870
2_wt.q.05_peak_35936	chr6	12747406	12749666
2_wt.q.05_peak_7348	chr11	69070328	69071081
2_wt.q.05_peak_15953	chr15	36791097	36792577
2_wt.q.05_peak_13958	chr14	34673270	34674186
2_wt.q.05_peak_28319	chr3	45376840	45379500
2_wt.q.05_peak_29983	chr3	130180329	130181141
2_wt.q.05_peak_41675	chr8	45974513	45976037
2_wt.q.05_peak_38995	chr7	45017246	45018272
2_wt.q.05_peak_26627	chr2	124609832	124610851
2_wt.q.05_peak_9457	chr12	37880042	37881955
2_wt.q.05_peak_35550	chr5	137745409	137746207
2_wt.q.05_peak_23012	chr19	11912695	11913562
2_wt.q.05_peak_7425	chr11	71033439	71034085
2_wt.q.05_peak_14836	chr14	79479929	79482941
2_wt.q.05_peak_33603	chr5	30647529	30648336
2_wt.q.05_peak_4656	chr10	67912449	67913584
2_wt.q.05_peak_34820	chr5	107596887	107597541
2_wt.q.05_peak_39149	chr7	54835612	54836085
2_wt.q.05_peak_7529	chr11	75462377	75463359
2_wt.q.05_peak_34788	chr5	105699106	105700535
2_wt.q.05_peak_29480	chr3	104220415	104221342
2_wt.q.05_peak_14583	chr14	70099650	70100515
2_wt.q.05_peak_37175	chr6	87980643	87982008
2_wt.q.05_peak_35544	chr5	137600100	137601437
2_wt.q.05_peak_44602	chr9	70206948	70207913
2_wt.q.05_peak_16778	chr15	76722296	76722636
2_wt.q.05_peak_37940	chr6	119902410	119903516
2_wt.q.05_peak_31139	chr4	45408857	45409552
2_wt.q.05_peak_34564	chr5	92083104	92083928
2_wt.q.05_peak_17820	chr16	13903197	13904001
2_wt.q.05_peak_40070	chr7	100705982	100706977
2_wt.q.05_peak_20160	chr17	47009253	47011157
2_wt.q.05_peak_41535	chr8	36951243	36953152
2_wt.q.05_peak_39256	chr7	61980518	61982296
2_wt.q.05_peak_5498	chr10	107271374	107271887
2_wt.q.05_peak_24586	chr2	30392683	30393018
2_wt.q.05_peak_4955	chr10	80930115	80930758
2_wt.q.05_peak_3483	chr1	193128845	193130392
2_wt.q.05_peak_6347	chr11	21369449	21372185
2_wt.q.05_peak_15444	chr15	5184914	5186706
2_wt.q.05_peak_7061	chr11	55097205	55098174
2_wt.q.05_peak_3304	chr1	182764458	182766318
2_wt.q.05_peak_24333	chr2	18063686	18064135
2_wt.q.05_peak_26679	chr2	127791266	127792645
2_wt.q.05_peak_27144	chr2	144526418	144527764
2_wt.q.05_peak_6408	chr11	24073433	24081479
2_wt.q.05_peak_10105	chr12	75596635	75597106
2_wt.q.05_peak_38029	chr6	125095757	125096032
2_wt.q.05_peak_3205	chr1	178337355	178338151
2_wt.q.05_peak_40119	chr7	101969663	101971575
2_wt.q.05_peak_3282	chr1	181842025	181842364
2_wt.q.05_peak_38769	chr7	28741352	28742498
2_wt.q.05_peak_21449	chr18	31633570	31635497
2_wt.q.05_peak_22292	chr18	66860168	66860897
2_wt.q.05_peak_849	chr1	52498887	52500185
2_wt.q.05_peak_32414	chr4	126058541	126059738
2_wt.q.05_peak_6001	chr10	127521867	127522710
2_wt.q.05_peak_26164	chr2	103797708	103798172
2_wt.q.05_peak_36828	chr6	61179216	61180153
2_wt.q.05_peak_16901	chr15	79690067	79690818
2_wt.q.05_peak_22945	chr19	8818867	8820478
2_wt.q.05_peak_22533	chr18	77065941	77066918
2_wt.q.05_peak_5701	chr10	111164062	111164691
2_wt.q.05_peak_26357	chr2	114174724	114175777
2_wt.q.05_peak_45968	chrX	50634374	50635372
2_wt.q.05_peak_45395	chr9	109875121	109875991
2_wt.q.05_peak_33729	chr5	34525727	34526552
2_wt.q.05_peak_1197	chr1	66815608	66818120
2_wt.q.05_peak_34684	chr5	100037776	100041003
2_wt.q.05_peak_14162	chr14	54253407	54254414
2_wt.q.05_peak_19200	chr16	91645831	91647662
2_wt.q.05_peak_43372	chr9	21760013	21760865
2_wt.q.05_peak_31295	chr4	55349109	55349998
2_wt.q.05_peak_40908	chr7	143295197	143296482
2_wt.q.05_peak_25491	chr2	71054710	71056610
2_wt.q.05_peak_4143	chr10	34297453	34298172
2_wt.q.05_peak_12332	chr13	73330594	73331252
2_wt.q.05_peak_33083	chr4	155066225	155067428
2_wt.q.05_peak_7390	chr11	69921001	69922501
2_wt.q.05_peak_43168	chr8	128685193	128685618
2_wt.q.05_peak_8554	chr11	109425885	109426480
2_wt.q.05_peak_38024	chr6	124965323	124966067
2_wt.q.05_peak_29277	chr3	95588429	95589373
2_wt.q.05_peak_19220	chr16	92466412	92466983
2_wt.q.05_peak_7695	chr11	80141607	80142506
2_wt.q.05_peak_29099	chr3	88042827	88043448
2_wt.q.05_peak_34830	chr5	107987237	107988297
2_wt.q.05_peak_29455	chr3	103171367	103172130
2_wt.q.05_peak_1169	chr1	66321198	66323939
2_wt.q.05_peak_22886	chr19	7039226	7040334
2_wt.q.05_peak_14340	chr14	62760799	62762304
2_wt.q.05_peak_29117	chr3	88410196	88410519
2_wt.q.05_peak_19694	chr17	24936248	24937333
2_wt.q.05_peak_30207	chr3	141931284	141932299
2_wt.q.05_peak_44501	chr9	65827816	65828129
2_wt.q.05_peak_19436	chr17	6948768	6949476
2_wt.q.05_peak_42155	chr8	72492960	72493441
2_wt.q.05_peak_32237	chr4	116807009	116807767
2_wt.q.05_peak_40907	chr7	142533193	142533471
2_wt.q.05_peak_21145	chr18	11840032	11841701
2_wt.q.05_peak_32503	chr4	128609481	128610814
2_wt.q.05_peak_8824	chr11	121038629	121039406
2_wt.q.05_peak_44431	chr9	62811415	62812284
2_wt.q.05_peak_11548	chr13	30659646	30660849
2_wt.q.05_peak_15737	chr15	27466825	27468510
2_wt.q.05_peak_8819	chr11	120713934	120714216
2_wt.q.05_peak_45755	chr9	122570979	122573967
2_wt.q.05_peak_40051	chr7	100368805	100373249
2_wt.q.05_peak_38613	chr7	18990732	18991780
2_wt.q.05_peak_19725	chr17	25808572	25808942
2_wt.q.05_peak_35551	chr5	137777958	137778601
2_wt.q.05_peak_22563	chr18	77714142	77714686
2_wt.q.05_peak_6364	chr11	22512081	22512550
2_wt.q.05_peak_27541	chr2	163994672	163995041
2_wt.q.05_peak_21927	chr18	49755225	49756255
2_wt.q.05_peak_16376	chr15	58414439	58416505
2_wt.q.05_peak_4545	chr10	61694425	61695357
2_wt.q.05_peak_36720	chr6	54564084	54567056
2_wt.q.05_peak_24358	chr2	19343886	19345027
2_wt.q.05_peak_2866	chr1	166409350	166410150
2_wt.q.05_peak_5099	chr10	88826371	88827096
2_wt.q.05_peak_7389	chr11	69914067	69914609
2_wt.q.05_peak_41924	chr8	64692510	64693428
2_wt.q.05_peak_22276	chr18	65799888	65800725
2_wt.q.05_peak_17117	chr15	89139581	89140348
2_wt.q.05_peak_30947	chr4	33310023	33311061
2_wt.q.05_peak_29222	chr3	93555186	93556120
2_wt.q.05_peak_17770	chr16	11909227	11909617
2_wt.q.05_peak_38492	chr7	4924887	4925461
2_wt.q.05_peak_19380	chr17	4993644	4995319
2_wt.q.05_peak_3943	chr10	21994065	21997057
2_wt.q.05_peak_36867	chr6	66534638	66535172
2_wt.q.05_peak_7422	chr11	71003337	71005165
2_wt.q.05_peak_36227	chr6	30508733	30510521
2_wt.q.05_peak_36153	chr6	28479463	28480774
2_wt.q.05_peak_31694	chr4	83524598	83526276
2_wt.q.05_peak_36242	chr6	30896929	30897398
2_wt.q.05_peak_36372	chr6	35132052	35134507
2_wt.q.05_peak_29115	chr3	88335218	88336519
2_wt.q.05_peak_4477	chr10	58445826	58446722
2_wt.q.05_peak_19604	chr17	17374036	17375127
2_wt.q.05_peak_19690	chr17	24885800	24887046
2_wt.q.05_peak_15954	chr15	36794322	36794978
2_wt.q.05_peak_8234	chr11	100770482	100771230
2_wt.q.05_peak_37932	chr6	119478782	119479507
2_wt.q.05_peak_22161	chr18	61554742	61555013
2_wt.q.05_peak_33516	chr5	24576841	24578098
2_wt.q.05_peak_46214	chrX	136203227	136204131
2_wt.q.05_peak_45655	chr9	119340401	119341459
2_wt.q.05_peak_36522	chr6	40470908	40472013
2_wt.q.05_peak_45403	chr9	110117153	110117707
2_wt.q.05_peak_42517	chr8	91312988	91313996
2_wt.q.05_peak_41069	chr8	11634624	11636436
2_wt.q.05_peak_12149	chr13	59674866	59675770
2_wt.q.05_peak_44343	chr9	59481648	59481928
2_wt.q.05_peak_5775	chr10	115383020	115385233
2_wt.q.05_peak_23926	chr19	59492517	59492983
2_wt.q.05_peak_31347	chr4	59003633	59004533
2_wt.q.05_peak_32213	chr4	116073737	116075380
2_wt.q.05_peak_22838	chr19	5801343	5805819
2_wt.q.05_peak_1288	chr1	75217553	75219567
2_wt.q.05_peak_6977	chr11	52000565	52001167
2_wt.q.05_peak_1912	chr1	124044281	124045399
2_wt.q.05_peak_36868	chr6	66535462	66535838
2_wt.q.05_peak_38987	chr7	44869997	44870467
2_wt.q.05_peak_36239	chr6	30737871	30738226
2_wt.q.05_peak_29097	chr3	87929767	87931297
2_wt.q.05_peak_16490	chr15	64921017	64922508
2_wt.q.05_peak_17851	chr16	16896588	16896897
2_wt.q.05_peak_30626	chr4	9667477	9669626
2_wt.q.05_peak_27174	chr2	145933914	145935074
2_wt.q.05_peak_4779	chr10	72654402	72655575
2_wt.q.05_peak_25158	chr2	57181562	57182747
2_wt.q.05_peak_41378	chr8	27128085	27128649
2_wt.q.05_peak_46198	chrX	133688311	133689358
2_wt.q.05_peak_35924	chr6	11906958	11908413
2_wt.q.05_peak_32067	chr4	105110074	105110525
2_wt.q.05_peak_35716	chr5	146232159	146233028
2_wt.q.05_peak_19368	chr17	3556993	3558529
2_wt.q.05_peak_10777	chr12	105784739	105785509
2_wt.q.05_peak_2454	chr1	152763859	152768664
2_wt.q.05_peak_39042	chr7	45717740	45718625
2_wt.q.05_peak_7386	chr11	69837817	69838915
2_wt.q.05_peak_23882	chr19	57452464	57453449
2_wt.q.05_peak_24773	chr2	35978389	35979695
2_wt.q.05_peak_318	chr1	24678440	24678738
2_wt.q.05_peak_41871	chr8	60631323	60634319
2_wt.q.05_peak_29112	chr3	88296302	88298071
2_wt.q.05_peak_19840	chr17	29031670	29034872
2_wt.q.05_peak_41884	chr8	60992271	60994255
2_wt.q.05_peak_9327	chr12	31498998	31500188
2_wt.q.05_peak_16793	chr15	76948220	76948739
2_wt.q.05_peak_7626	chr11	78497511	78498268
2_wt.q.05_peak_4918	chr10	80172974	80173893
2_wt.q.05_peak_39997	chr7	98655200	98657522
2_wt.q.05_peak_32685	chr4	134395589	134396773
2_wt.q.05_peak_4575	chr10	63243224	63243621
2_wt.q.05_peak_22790	chr19	4838968	4839614
2_wt.q.05_peak_45921	chrX	38634627	38635246
2_wt.q.05_peak_24483	chr2	25863107	25863368
2_wt.q.05_peak_12045	chr13	55444252	55444859
2_wt.q.05_peak_19760	chr17	26506945	26509664
2_wt.q.05_peak_16679	chr15	72808568	72810935
2_wt.q.05_peak_34701	chr5	100674508	100674851
2_wt.q.05_peak_1641	chr1	93478036	93479166
2_wt.q.05_peak_19814	chr17	28232299	28233284
2_wt.q.05_peak_33620	chr5	31048045	31048566
2_wt.q.05_peak_25355	chr2	65929145	65934818
2_wt.q.05_peak_38887	chr7	35585837	35586680
2_wt.q.05_peak_33736	chr5	34636259	34637204
2_wt.q.05_peak_21629	chr18	37020092	37021046
2_wt.q.05_peak_23655	chr19	46348188	46349654
2_wt.q.05_peak_7475	chr11	73198451	73199375
2_wt.q.05_peak_24019	chr2	5844737	5846040
2_wt.q.05_peak_2950	chr1	169968903	169969957
2_wt.q.05_peak_7254	chr11	65162761	65163417
2_wt.q.05_peak_11450	chr13	23697645	23698820
2_wt.q.05_peak_38559	chr7	16273128	16273986
2_wt.q.05_peak_38999	chr7	45062303	45063104
2_wt.q.05_peak_42260	chr8	79711103	79712315
2_wt.q.05_peak_17432	chr15	100227238	100227642
2_wt.q.05_peak_35108	chr5	121397349	121398900
2_wt.q.05_peak_40039	chr7	100159086	100160098
2_wt.q.05_peak_41111	chr8	14089665	14091104
2_wt.q.05_peak_42822	chr8	110217376	110218492
2_wt.q.05_peak_99	chr1	11413378	11416192
2_wt.q.05_peak_34534	chr5	89882749	89883218
2_wt.q.05_peak_35847	chr6	4086547	4087334
2_wt.q.05_peak_41247	chr8	18845632	18846798
2_wt.q.05_peak_32576	chr4	130663398	130665263
2_wt.q.05_peak_40129	chr7	102686773	102687598
2_wt.q.05_peak_25776	chr2	83811527	83813049
2_wt.q.05_peak_33509	chr5	24100053	24101953
2_wt.q.05_peak_43787	chr9	40268942	40270538
2_wt.q.05_peak_18399	chr16	37538460	37540381
2_wt.q.05_peak_38533	chr7	13054095	13055189
2_wt.q.05_peak_9838	chr12	65172653	65173358
2_wt.q.05_peak_42124	chr8	71396421	71397393
2_wt.q.05_peak_14311	chr14	61359706	61361161
2_wt.q.05_peak_21021	chr18	3336506	3336906
2_wt.q.05_peak_8694	chr11	116432269	116434738
2_wt.q.05_peak_8836	chr11	121386988	121388938
2_wt.q.05_peak_10194	chr12	80462828	80464486
2_wt.q.05_peak_37034	chr6	82652644	82653550
2_wt.q.05_peak_44997	chr9	94534215	94540880
2_wt.q.05_peak_45887	chrX	20616514	20618633
2_wt.q.05_peak_15552	chr15	12320709	12321308
2_wt.q.05_peak_10300	chr12	83687841	83689164
2_wt.q.05_peak_6549	chr11	30648539	30649290
2_wt.q.05_peak_1362	chr1	78488894	78489526
2_wt.q.05_peak_43875	chr9	42123443	42123889
2_wt.q.05_peak_1238	chr1	72306968	72307885
2_wt.q.05_peak_6064	chr11	3289698	3290789
2_wt.q.05_peak_12236	chr13	67420873	67421602
2_wt.q.05_peak_17366	chr15	98951689	98955638
2_wt.q.05_peak_46229	chrX	139684437	139685432
2_wt.q.05_peak_17002	chr15	82244465	82244747
2_wt.q.05_peak_32356	chr4	123410432	123413872
2_wt.q.05_peak_38753	chr7	27928876	27929800
2_wt.q.05_peak_41550	chr8	39005310	39006822
2_wt.q.05_peak_35270	chr5	124578659	124580037
2_wt.q.05_peak_44400	chr9	62122383	62123347
2_wt.q.05_peak_16774	chr15	76659458	76660522
2_wt.q.05_peak_19998	chr17	35666350	35666860
2_wt.q.05_peak_8545	chr11	108920124	108920823
2_wt.q.05_peak_16738	chr15	74672745	74674036
2_wt.q.05_peak_21681	chr18	38418595	38419214
2_wt.q.05_peak_45244	chr9	106280576	106281334
2_wt.q.05_peak_5808	chr10	117063976	117064270
2_wt.q.05_peak_5774	chr10	115361811	115363386
2_wt.q.05_peak_38481	chr7	4792438	4793150
2_wt.q.05_peak_19680	chr17	24550126	24550840
2_wt.q.05_peak_39549	chr7	79465402	79467702
2_wt.q.05_peak_32958	chr4	149426510	149427307
2_wt.q.05_peak_4464	chr10	58322979	58324741
2_wt.q.05_peak_7312	chr11	67922384	67922922
2_wt.q.05_peak_20315	chr17	56989684	56990816
2_wt.q.05_peak_10737	chr12	102742837	102744569
2_wt.q.05_peak_44217	chr9	55209047	55209332
2_wt.q.05_peak_32547	chr4	129640233	129642163
2_wt.q.05_peak_8814	chr11	120624241	120624995
2_wt.q.05_peak_36795	chr6	58830739	58835157
2_wt.q.05_peak_1500	chr1	86021064	86021953
2_wt.q.05_peak_38591	chr7	16923158	16923823
2_wt.q.05_peak_26208	chr2	104711010	104711844
2_wt.q.05_peak_19586	chr17	15395924	15396746
2_wt.q.05_peak_40058	chr7	100582684	100583116
2_wt.q.05_peak_40909	chr7	143548133	143549647
2_wt.q.05_peak_19190	chr16	91042967	91045218
2_wt.q.05_peak_33037	chr4	151989121	151989615
2_wt.q.05_peak_32792	chr4	138250103	138251334
2_wt.q.05_peak_22732	chr18	89769696	89770125
2_wt.q.05_peak_32230	chr4	116626561	116628386
2_wt.q.05_peak_8124	chr11	97884292	97884592
2_wt.q.05_peak_4551	chr10	62449219	62450352
2_wt.q.05_peak_6958	chr11	51584821	51585369
2_wt.q.05_peak_44683	chr9	72985505	72986305
2_wt.q.05_peak_29844	chr3	123506979	123509447
2_wt.q.05_peak_33814	chr5	38220070	38220739
2_wt.q.05_peak_21268	chr18	20896433	20896934
2_wt.q.05_peak_1031	chr1	59912097	59913351
2_wt.q.05_peak_23790	chr19	53527603	53529261
2_wt.q.05_peak_35076	chr5	120588336	120589306
2_wt.q.05_peak_5390	chr10	99260821	99263973
2_wt.q.05_peak_36780	chr6	57533259	57536309
2_wt.q.05_peak_36367	chr6	34910191	34911295
2_wt.q.05_peak_30000	chr3	132683495	132684074
2_wt.q.05_peak_17883	chr16	17404875	17407136
2_wt.q.05_peak_22794	chr19	4942842	4943167
2_wt.q.05_peak_34324	chr5	73490651	73491241
2_wt.q.05_peak_3395	chr1	190910165	190912022
2_wt.q.05_peak_6062	chr11	3266173	3267235
2_wt.q.05_peak_45816	chrX	8192078	8193774
2_wt.q.05_peak_27841	chr3	8922378	8924334
2_wt.q.05_peak_22892	chr19	7205545	7206677
2_wt.q.05_peak_18037	chr16	23107878	23109582
2_wt.q.05_peak_17859	chr16	16983694	16985037
2_wt.q.05_peak_42703	chr8	104533803	104534901
2_wt.q.05_peak_23400	chr19	34921775	34922249
2_wt.q.05_peak_29617	chr3	108721364	108722785
2_wt.q.05_peak_28713	chr3	69125569	69127755
2_wt.q.05_peak_44885	chr9	85748234	85750004
2_wt.q.05_peak_4906	chr10	79908369	79908899
2_wt.q.05_peak_8663	chr11	115563676	115564530
2_wt.q.05_peak_42087	chr8	70352794	70355115
2_wt.q.05_peak_40899	chr7	141902224	141903555
2_wt.q.05_peak_14411	chr14	64440017	64441278
2_wt.q.05_peak_30542	chr4	3936235	3939288
2_wt.q.05_peak_39539	chr7	79272404	79275602
2_wt.q.05_peak_40660	chr7	127470228	127472471
2_wt.q.05_peak_7178	chr11	60776746	60777883
2_wt.q.05_peak_15337	chr14	120910372	120910909
2_wt.q.05_peak_3874	chr10	19933370	19934505
2_wt.q.05_peak_37977	chr6	121184060	121184542
2_wt.q.05_peak_34996	chr5	115564281	115564604
2_wt.q.05_peak_7409	chr11	70668184	70669590
2_wt.q.05_peak_27314	chr2	154372499	154373128
2_wt.q.05_peak_21690	chr18	38992551	38992868
2_wt.q.05_peak_24551	chr2	29252898	29253443
2_wt.q.05_peak_8215	chr11	100397370	100398303
2_wt.q.05_peak_12989	chr13	100015049	100016195
2_wt.q.05_peak_25514	chr2	71872552	71874520
2_wt.q.05_peak_2838	chr1	165633335	165634733
2_wt.q.05_peak_14771	chr14	77156054	77156789
2_wt.q.05_peak_36792	chr6	57824021	57824429
2_wt.q.05_peak_29777	chr3	120885904	120887407
2_wt.q.05_peak_16744	chr15	74954650	74955642
2_wt.q.05_peak_4931	chr10	80399126	80400364
2_wt.q.05_peak_4387	chr10	52417379	52418496
2_wt.q.05_peak_2094	chr1	133025452	133025794
2_wt.q.05_peak_22512	chr18	74999810	75001575
2_wt.q.05_peak_40887	chr7	141437054	141437902
2_wt.q.05_peak_33018	chr4	150909424	150909879
2_wt.q.05_peak_44263	chr9	57130330	57131826
2_wt.q.05_peak_4548	chr10	62339208	62340920
2_wt.q.05_peak_45997	chrX	66652181	66653490
2_wt.q.05_peak_36766	chr6	56796486	56798292
2_wt.q.05_peak_5987	chr10	127288001	127292169
2_wt.q.05_peak_17006	chr15	82345790	82346942
2_wt.q.05_peak_69	chr1	9748106	9748414
2_wt.q.05_peak_25693	chr2	79454751	79457335
2_wt.q.05_peak_38928	chr7	39517492	39517967
2_wt.q.05_peak_3326	chr1	184844887	184846960
2_wt.q.05_peak_15758	chr15	27630068	27631132
2_wt.q.05_peak_6813	chr11	43747492	43748617
2_wt.q.05_peak_4872	chr10	77978149	77979068
2_wt.q.05_peak_23476	chr19	38263476	38266274
2_wt.q.05_peak_35825	chr5	150594537	150595042
2_wt.q.05_peak_39766	chr7	89979917	89981683
2_wt.q.05_peak_25098	chr2	52741015	52742878
2_wt.q.05_peak_4863	chr10	77581769	77582648
2_wt.q.05_peak_36672	chr6	51523834	51524367
2_wt.q.05_peak_11425	chr13	23430398	23433536
2_wt.q.05_peak_19649	chr17	23770359	23772116
2_wt.q.05_peak_23293	chr19	28009158	28012493
2_wt.q.05_peak_19724	chr17	25791856	25792349
2_wt.q.05_peak_36889	chr6	70843917	70844542
2_wt.q.05_peak_11894	chr13	47147689	47148816
2_wt.q.05_peak_36388	chr6	36387764	36388561
2_wt.q.05_peak_19606	chr17	17402677	17403564
2_wt.q.05_peak_9675	chr12	51692072	51692919
2_wt.q.05_peak_22305	chr18	67463711	67464710
2_wt.q.05_peak_39029	chr7	45509832	45510982
2_wt.q.05_peak_3412	chr1	191396745	191398252
2_wt.q.05_peak_35765	chr5	148398741	148400182
2_wt.q.05_peak_20145	chr17	46645381	46646465
2_wt.q.05_peak_3076	chr1	174501538	174503144
2_wt.q.05_peak_19995	chr17	35516636	35517470
2_wt.q.05_peak_33978	chr5	50058009	50058337
2_wt.q.05_peak_16006	chr15	38078086	38079585
2_wt.q.05_peak_8073	chr11	97188195	97189028
2_wt.q.05_peak_9608	chr12	49480171	49481457
2_wt.q.05_peak_27571	chr2	165286673	165289506
2_wt.q.05_peak_40410	chr7	118242465	118244297
2_wt.q.05_peak_42033	chr8	68793215	68794377
2_wt.q.05_peak_23878	chr19	57359569	57360942
2_wt.q.05_peak_42405	chr8	85431643	85433609
2_wt.q.05_peak_38227	chr6	136874936	136875801
2_wt.q.05_peak_2342	chr1	144002361	144005245
2_wt.q.05_peak_39038	chr7	45703917	45705930
2_wt.q.05_peak_30683	chr4	13750493	13751153
2_wt.q.05_peak_28108	chr3	30792658	30793530
2_wt.q.05_peak_40680	chr7	127912307	127912810
2_wt.q.05_peak_20351	chr17	62881554	62882428
2_wt.q.05_peak_25807	chr2	84733279	84735201
2_wt.q.05_peak_7344	chr11	69059248	69059951
2_wt.q.05_peak_44351	chr9	59577631	59578401
2_wt.q.05_peak_21653	chr18	37934894	37935409
2_wt.q.05_peak_39170	chr7	56018857	56019331
2_wt.q.05_peak_17150	chr15	90678700	90679328
2_wt.q.05_peak_30569	chr4	6190324	6191693
2_wt.q.05_peak_8225	chr11	100622403	100623388
2_wt.q.05_peak_23528	chr19	41932694	41934056
2_wt.q.05_peak_24829	chr2	39065016	39066192
2_wt.q.05_peak_34537	chr5	90223279	90224426
2_wt.q.05_peak_38654	chr7	24207841	24208168
2_wt.q.05_peak_12337	chr13	73937854	73938135
2_wt.q.05_peak_21313	chr18	23497084	23497748
2_wt.q.05_peak_4564	chr10	62920141	62921061
2_wt.q.05_peak_39553	chr7	79504516	79505262
2_wt.q.05_peak_6321	chr11	20331925	20333383
2_wt.q.05_peak_19531	chr17	12316042	12319671
2_wt.q.05_peak_29675	chr3	116593820	116594857
2_wt.q.05_peak_25950	chr2	92387859	92388766
2_wt.q.05_peak_28177	chr3	33799122	33800798
2_wt.q.05_peak_17228	chr15	93596021	93597422
2_wt.q.05_peak_34865	chr5	110230657	110231475
2_wt.q.05_peak_4463	chr10	58255092	58256274
2_wt.q.05_peak_12061	chr13	55622697	55623504
2_wt.q.05_peak_14064	chr14	45658238	45658897
2_wt.q.05_peak_44660	chr9	72531228	72531927
2_wt.q.05_peak_21511	chr18	34330710	34331299
2_wt.q.05_peak_43487	chr9	26734459	26735040
2_wt.q.05_peak_29127	chr3	88501285	88503748
2_wt.q.05_peak_36875	chr6	67265948	67269690
2_wt.q.05_peak_46407	chrX	168673342	168673735
2_wt.q.05_peak_33024	chr4	151044159	151046093
2_wt.q.05_peak_41356	chr8	26014853	26015850
2_wt.q.05_peak_15039	chr14	103069982	103071549
2_wt.q.05_peak_45676	chr9	120303126	120303726
2_wt.q.05_peak_12462	chr13	81709977	81712578
2_wt.q.05_peak_7272	chr11	66168011	66168824
2_wt.q.05_peak_16468	chr15	64312705	64313406
2_wt.q.05_peak_38480	chr7	4739498	4740103
2_wt.q.05_peak_4826	chr10	75921212	75921872
2_wt.q.05_peak_20318	chr17	57031688	57032141
2_wt.q.05_peak_12066	chr13	55727800	55728389
2_wt.q.05_peak_32863	chr4	140960721	140961183
2_wt.q.05_peak_3053	chr1	172297819	172298320
2_wt.q.05_peak_9721	chr12	54794721	54795176
2_wt.q.05_peak_13420	chr14	8214737	8216709
2_wt.q.05_peak_33118	chr4	155704631	155705205
2_wt.q.05_peak_5192	chr10	91170009	91171565
2_wt.q.05_peak_42566	chr8	94601052	94601786
2_wt.q.05_peak_7760	chr11	83291512	83292544
2_wt.q.05_peak_32626	chr4	132638303	132638999
2_wt.q.05_peak_7172	chr11	60416710	60417618
2_wt.q.05_peak_31118	chr4	44168305	44169486
2_wt.q.05_peak_8017	chr11	94320890	94323058
2_wt.q.05_peak_41537	chr8	36993281	36994500
2_wt.q.05_peak_19211	chr16	92057711	92058216
2_wt.q.05_peak_13455	chr14	11553222	11554976
2_wt.q.05_peak_44087	chr9	50603263	50604401
2_wt.q.05_peak_22982	chr19	10457827	10458247
2_wt.q.05_peak_28843	chr3	79627715	79628212
2_wt.q.05_peak_40080	chr7	100932014	100933132
2_wt.q.05_peak_31287	chr4	54945800	54950209
2_wt.q.05_peak_40180	chr7	109518340	109518958
2_wt.q.05_peak_10466	chr12	89812178	89812782
2_wt.q.05_peak_6839	chr11	46055833	46056648
2_wt.q.05_peak_16843	chr15	78117297	78119444
2_wt.q.05_peak_531	chr1	37368065	37369086
2_wt.q.05_peak_11608	chr13	36117398	36118771
2_wt.q.05_peak_17969	chr16	20716271	20718575
2_wt.q.05_peak_19233	chr16	93831727	93833324
2_wt.q.05_peak_294	chr1	24005054	24005636
2_wt.q.05_peak_35741	chr5	147075284	147078174
2_wt.q.05_peak_35283	chr5	125177897	125180415
2_wt.q.05_peak_14134	chr14	50923900	50925754
2_wt.q.05_peak_12707	chr13	92609537	92611544
2_wt.q.05_peak_41362	chr8	26157320	26158639
2_wt.q.05_peak_20903	chr17	88529661	88530362
2_wt.q.05_peak_37085	chr6	85333010	85334038
2_wt.q.05_peak_10110	chr12	75735839	75736958
2_wt.q.05_peak_32365	chr4	123616731	123617376
2_wt.q.05_peak_46160	chrX	104482792	104483814
2_wt.q.05_peak_8256	chr11	101315569	101316093
2_wt.q.05_peak_5135	chr10	90576019	90578709
2_wt.q.05_peak_35384	chr5	129895329	129896019
2_wt.q.05_peak_19298	chr16	95990472	95991271
2_wt.q.05_peak_3724	chr10	12921643	12923286
2_wt.q.05_peak_42736	chr8	105860163	105860925
2_wt.q.05_peak_27591	chr2	165883245	165884845
2_wt.q.05_peak_38997	chr7	45053565	45054192
2_wt.q.05_peak_3087	chr1	174921547	174922058
2_wt.q.05_peak_6394	chr11	23664730	23665628
2_wt.q.05_peak_4340	chr10	45066258	45068192
2_wt.q.05_peak_39261	chr7	63443313	63444297
2_wt.q.05_peak_8198	chr11	99230878	99231445
2_wt.q.05_peak_10120	chr12	76368313	76369415
2_wt.q.05_peak_11391	chr13	21734069	21734806
2_wt.q.05_peak_5907	chr10	122982473	122988468
2_wt.q.05_peak_13883	chr14	30352223	30352942
2_wt.q.05_peak_17502	chr15	102202835	102203540
2_wt.q.05_peak_12648	chr13	90088677	90090025
2_wt.q.05_peak_25330	chr2	65566457	65567881
2_wt.q.05_peak_45958	chrX	48513129	48514141
2_wt.q.05_peak_35714	chr5	146220766	146221668
2_wt.q.05_peak_45057	chr9	96729808	96733704
2_wt.q.05_peak_26567	chr2	121288491	121290234
2_wt.q.05_peak_39080	chr7	48958710	48959368
2_wt.q.05_peak_32675	chr4	134102592	134103044
2_wt.q.05_peak_15515	chr15	11905897	11907403
2_wt.q.05_peak_42072	chr8	69903147	69903812
2_wt.q.05_peak_26266	chr2	109673710	109675559
2_wt.q.05_peak_38230	chr6	137252328	137253033
2_wt.q.05_peak_12993	chr13	100492129	100492575
2_wt.q.05_peak_22513	chr18	75005172	75006331
2_wt.q.05_peak_11042	chr13	3892477	3893838
2_wt.q.05_peak_20140	chr17	46553017	46553355
2_wt.q.05_peak_35537	chr5	137287300	137287819
2_wt.q.05_peak_44824	chr9	81631386	81632084
2_wt.q.05_peak_10867	chr12	110888086	110890310
2_wt.q.05_peak_42042	chr8	69088058	69091322
2_wt.q.05_peak_36750	chr6	55683391	55684012
2_wt.q.05_peak_44407	chr9	62340074	62343212
2_wt.q.05_peak_45394	chr9	109832590	109833093
2_wt.q.05_peak_15246	chr14	118137640	118137940
2_wt.q.05_peak_46164	chrX	105119406	105120227
2_wt.q.05_peak_18224	chr16	32332697	32333675
2_wt.q.05_peak_38528	chr7	12977395	12978196
2_wt.q.05_peak_13080	chr13	103919081	103920380
2_wt.q.05_peak_35212	chr5	123748141	123750149
2_wt.q.05_peak_31854	chr4	94602325	94603475
2_wt.q.05_peak_43850	chr9	41579068	41585176
2_wt.q.05_peak_11525	chr13	29014729	29017310
2_wt.q.05_peak_29319	chr3	96240504	96241143
2_wt.q.05_peak_34864	chr5	110176091	110177157
2_wt.q.05_peak_32921	chr4	148040942	148042682
2_wt.q.05_peak_14594	chr14	70519265	70519682
2_wt.q.05_peak_18441	chr16	38522263	38523840
2_wt.q.05_peak_14413	chr14	64455047	64456382
2_wt.q.05_peak_22942	chr19	8797831	8799093
2_wt.q.05_peak_38501	chr7	6171032	6172957
2_wt.q.05_peak_42775	chr8	107030995	107031378
2_wt.q.05_peak_7924	chr11	88954627	88955695
2_wt.q.05_peak_26320	chr2	112367741	112368853
2_wt.q.05_peak_32268	chr4	119232316	119233422
2_wt.q.05_peak_14059	chr14	45530302	45530840
2_wt.q.05_peak_7215	chr11	62280578	62281384
2_wt.q.05_peak_17667	chr16	8636806	8638327
2_wt.q.05_peak_21053	chr18	5591161	5591702
2_wt.q.05_peak_1798	chr1	106758308	106761215
2_wt.q.05_peak_3911	chr10	21296034	21296565
2_wt.q.05_peak_3734	chr10	13553212	13553781
2_wt.q.05_peak_19180	chr16	90809792	90810481
2_wt.q.05_peak_10200	chr12	80790003	80792420
2_wt.q.05_peak_7069	chr11	55468305	55469605
2_wt.q.05_peak_42420	chr8	85701353	85701627
2_wt.q.05_peak_29320	chr3	96245057	96245424
2_wt.q.05_peak_42878	chr8	111933336	111934339
2_wt.q.05_peak_36363	chr6	34780088	34780514
2_wt.q.05_peak_27223	chr2	148732005	148733432
2_wt.q.05_peak_42750	chr8	106209692	106211443
2_wt.q.05_peak_29238	chr3	94582017	94583381
2_wt.q.05_peak_3631	chr10	7792276	7793385
2_wt.q.05_peak_39908	chr7	92741014	92742933
2_wt.q.05_peak_9371	chr12	32819579	32820099
2_wt.q.05_peak_35167	chr5	122820632	122821714
2_wt.q.05_peak_6708	chr11	40754414	40755944
2_wt.q.05_peak_21321	chr18	23752868	23754801
2_wt.q.05_peak_12991	chr13	100107571	100108208
2_wt.q.05_peak_19979	chr17	34959312	34960078
2_wt.q.05_peak_29684	chr3	116965909	116968928
2_wt.q.05_peak_32788	chr4	138217188	138217603
2_wt.q.05_peak_9053	chr12	12940277	12942552
2_wt.q.05_peak_27024	chr2	140394976	140395800
2_wt.q.05_peak_42804	chr8	109606687	109608979
2_wt.q.05_peak_3113	chr1	175880266	175880756
2_wt.q.05_peak_42629	chr8	99415927	99416915
2_wt.q.05_peak_37514	chr6	103511108	103511895
2_wt.q.05_peak_31394	chr4	65604509	65605382
2_wt.q.05_peak_31939	chr4	99828645	99830112
2_wt.q.05_peak_46032	chrX	73715730	73716507
2_wt.q.05_peak_42551	chr8	94213968	94215422
2_wt.q.05_peak_8082	chr11	97315911	97316640
2_wt.q.05_peak_35163	chr5	122779210	122780021
2_wt.q.05_peak_46053	chrX	75874820	75875480
2_wt.q.05_peak_38129	chr6	134791364	134791954
2_wt.q.05_peak_14144	chr14	51884906	51885347
2_wt.q.05_peak_4769	chr10	71347083	71348069
2_wt.q.05_peak_32142	chr4	109342550	109344605
2_wt.q.05_peak_8681	chr11	116030012	116030493
2_wt.q.05_peak_8254	chr11	101278024	101279344
2_wt.q.05_peak_3022	chr1	171294586	171295023
2_wt.q.05_peak_23315	chr19	28989774	28990712
2_wt.q.05_peak_35707	chr5	144965949	144966577
2_wt.q.05_peak_19449	chr17	8372073	8372789
2_wt.q.05_peak_43880	chr9	42209343	42210078
2_wt.q.05_peak_20311	chr17	56716600	56717928
2_wt.q.05_peak_38984	chr7	44857175	44858050
2_wt.q.05_peak_31076	chr4	41759699	41760315
2_wt.q.05_peak_19899	chr17	31564194	31564735
[truncated: 4,351 more rows]

## Sheet: MYT1L_PFC_Active_Enhancer
PeakID	Chr	Start	End
2_wt.q.05_peak_10526	chr12	95491662	95492234
2_wt.q.05_peak_21788	chr18	41905044	41905855
2_wt.q.05_peak_30254	chr3	144018959	144019870
2_wt.q.05_peak_26942	chr2	136419320	136419758
2_wt.q.05_peak_1748	chr1	104226134	104227764
2_wt.q.05_peak_33898	chr5	44387468	44388102
2_wt.q.05_peak_15153	chr14	108878178	108879017
2_wt.q.05_peak_22543	chr18	77193966	77195337
2_wt.q.05_peak_13641	chr14	20831260	20833725
2_wt.q.05_peak_20020	chr17	36001304	36002543
2_wt.q.05_peak_42437	chr8	86280028	86280552
2_wt.q.05_peak_19454	chr17	8515805	8516811
2_wt.q.05_peak_27073	chr2	142769419	142769940
2_wt.q.05_peak_75	chr1	9815491	9815882
2_wt.q.05_peak_42007	chr8	67877637	67878750
2_wt.q.05_peak_1273	chr1	74824530	74825895
2_wt.q.05_peak_43651	chr9	32215733	32217782
2_wt.q.05_peak_32149	chr4	110201061	110201608
2_wt.q.05_peak_39286	chr7	64160196	64161011
2_wt.q.05_peak_40967	chr8	6110436	6111860
2_wt.q.05_peak_26727	chr2	129912733	129913190
2_wt.q.05_peak_1050	chr1	60701712	60702234
2_wt.q.05_peak_36897	chr6	71428119	71428948
2_wt.q.05_peak_9517	chr12	41877550	41878067
2_wt.q.05_peak_22072	chr18	59291631	59292320
2_wt.q.05_peak_36712	chr6	54461195	54461907
2_wt.q.05_peak_37350	chr6	94271704	94272779
2_wt.q.05_peak_14948	chr14	93832153	93832957
2_wt.q.05_peak_36967	chr6	75491167	75491577
2_wt.q.05_peak_18174	chr16	31290196	31290923
2_wt.q.05_peak_12842	chr13	96405410	96406021
2_wt.q.05_peak_18449	chr16	38874330	38875213
2_wt.q.05_peak_45242	chr9	106211060	106212041
2_wt.q.05_peak_12848	chr13	96680038	96681681
2_wt.q.05_peak_12093	chr13	58090850	58091266
2_wt.q.05_peak_29693	chr3	117265522	117266404
2_wt.q.05_peak_19294	chr16	95802557	95803184
2_wt.q.05_peak_35015	chr5	116016378	116016949
2_wt.q.05_peak_25913	chr2	91682863	91683989
2_wt.q.05_peak_27088	chr2	143133447	143134064
2_wt.q.05_peak_15144	chr14	108744219	108745083
2_wt.q.05_peak_15417	chr14	124634779	124635610
2_wt.q.05_peak_33797	chr5	37177008	37177858
2_wt.q.05_peak_26316	chr2	112295595	112296388
2_wt.q.05_peak_22740	chr19	3479890	3480763
2_wt.q.05_peak_20304	chr17	56494060	56495031
2_wt.q.05_peak_4892	chr10	79597341	79597839
2_wt.q.05_peak_32285	chr4	119880994	119882124
2_wt.q.05_peak_18262	chr16	33414121	33414666
2_wt.q.05_peak_37524	chr6	103655701	103657305
2_wt.q.05_peak_31969	chr4	101620263	101621863
2_wt.q.05_peak_23720	chr19	48097698	48098460
2_wt.q.05_peak_32558	chr4	129717786	129718180
2_wt.q.05_peak_21806	chr18	42657762	42658635
2_wt.q.05_peak_43883	chr9	42321362	42322063
2_wt.q.05_peak_43407	chr9	23856073	23856835
2_wt.q.05_peak_33827	chr5	39062943	39063617
2_wt.q.05_peak_45747	chr9	122304555	122305053
2_wt.q.05_peak_44749	chr9	75676041	75677563
2_wt.q.05_peak_28783	chr3	75624208	75625351
2_wt.q.05_peak_1871	chr1	120136450	120137154
2_wt.q.05_peak_11139	chr13	10163143	10163976
2_wt.q.05_peak_3512	chr1	194267641	194268965
2_wt.q.05_peak_42666	chr8	102760552	102761624
2_wt.q.05_peak_16248	chr15	51470743	51471862
2_wt.q.05_peak_35040	chr5	117999438	118000170
2_wt.q.05_peak_5491	chr10	106938720	106939036
2_wt.q.05_peak_21301	chr18	23045538	23046671
2_wt.q.05_peak_28722	chr3	69438519	69440074
2_wt.q.05_peak_21154	chr18	12059494	12059958
2_wt.q.05_peak_21455	chr18	31826829	31827653
2_wt.q.05_peak_4536	chr10	60996103	60996382
2_wt.q.05_peak_18434	chr16	38189668	38190638
2_wt.q.05_peak_13219	chr13	110008514	110009029
2_wt.q.05_peak_15256	chr14	118883531	118884577
2_wt.q.05_peak_26050	chr2	97581013	97581299
2_wt.q.05_peak_5480	chr10	106760930	106761855
2_wt.q.05_peak_10409	chr12	87329879	87331012
2_wt.q.05_peak_34210	chr5	67701434	67702374
2_wt.q.05_peak_6882	chr11	48550909	48552726
2_wt.q.05_peak_14807	chr14	78368860	78369618
2_wt.q.05_peak_24861	chr2	42530013	42532148
2_wt.q.05_peak_21418	chr18	29326919	29327913
2_wt.q.05_peak_38401	chr6	148172071	148172593
2_wt.q.05_peak_14114	chr14	49045812	49046537
2_wt.q.05_peak_31293	chr4	55325981	55326571
2_wt.q.05_peak_8431	chr11	105795872	105796467
2_wt.q.05_peak_3392	chr1	189960208	189961130
2_wt.q.05_peak_43083	chr8	124547061	124547437
2_wt.q.05_peak_37686	chr6	111195105	111195773
2_wt.q.05_peak_21701	chr18	39164886	39165621
2_wt.q.05_peak_12625	chr13	86005177	86005679
2_wt.q.05_peak_13260	chr13	110881602	110883342
2_wt.q.05_peak_35620	chr5	142420048	142420941
2_wt.q.05_peak_149	chr1	14233632	14234791
2_wt.q.05_peak_30516	chr3	158886188	158886831
2_wt.q.05_peak_22245	chr18	65093300	65093781
2_wt.q.05_peak_44019	chr9	47738822	47740079
2_wt.q.05_peak_7071	chr11	56072038	56072673
2_wt.q.05_peak_2003	chr1	129421250	129422148
2_wt.q.05_peak_42867	chr8	111576150	111577106
2_wt.q.05_peak_7507	chr11	75117928	75119759
2_wt.q.05_peak_13376	chr13	118363085	118364090
2_wt.q.05_peak_34930	chr5	112780300	112782338
2_wt.q.05_peak_41887	chr8	61210491	61211362
2_wt.q.05_peak_23845	chr19	56696029	56696367
2_wt.q.05_peak_30356	chr3	152146926	152147994
2_wt.q.05_peak_45543	chr9	113081176	113081650
2_wt.q.05_peak_17712	chr16	9823450	9824605
2_wt.q.05_peak_43445	chr9	25205197	25206217
2_wt.q.05_peak_41294	chr8	23740705	23741528
2_wt.q.05_peak_33511	chr5	24111445	24111916
2_wt.q.05_peak_9823	chr12	64910710	64911131
2_wt.q.05_peak_6798	chr11	43096150	43096612
2_wt.q.05_peak_842	chr1	52294262	52295278
2_wt.q.05_peak_8433	chr11	105825974	105826284
2_wt.q.05_peak_40159	chr7	105621326	105621834
2_wt.q.05_peak_35647	chr5	143053315	143053808
2_wt.q.05_peak_21041	chr18	4617046	4618120
2_wt.q.05_peak_12305	chr13	69777797	69778850
2_wt.q.05_peak_23383	chr19	33239379	33240950
2_wt.q.05_peak_889	chr1	54059572	54061583
2_wt.q.05_peak_14751	chr14	76701224	76701898
2_wt.q.05_peak_40588	chr7	124907559	124907990
2_wt.q.05_peak_5321	chr10	98212660	98213565
2_wt.q.05_peak_41214	chr8	17324830	17325159
2_wt.q.05_peak_27096	chr2	143270700	143271335
2_wt.q.05_peak_32623	chr4	132542404	132543496
2_wt.q.05_peak_17285	chr15	95473277	95475017
2_wt.q.05_peak_12988	chr13	99966611	99967638
2_wt.q.05_peak_30240	chr3	143581858	143582336
2_wt.q.05_peak_4844	chr10	76511308	76511698
2_wt.q.05_peak_9197	chr12	25982566	25983508
2_wt.q.05_peak_31989	chr4	102353577	102354444
2_wt.q.05_peak_31084	chr4	42940861	42941939
2_wt.q.05_peak_17987	chr16	21523370	21525574
2_wt.q.05_peak_13725	chr14	23842371	23843576
2_wt.q.05_peak_13999	chr14	38785335	38785598
2_wt.q.05_peak_23384	chr19	33251729	33253242
2_wt.q.05_peak_29937	chr3	127369283	127370308
2_wt.q.05_peak_28954	chr3	82315485	82316522
2_wt.q.05_peak_18568	chr16	44525540	44526189
2_wt.q.05_peak_40208	chr7	110555001	110556260
2_wt.q.05_peak_31339	chr4	58477446	58478343
2_wt.q.05_peak_23835	chr19	56451385	56451696
2_wt.q.05_peak_28744	chr3	70421545	70423154
2_wt.q.05_peak_6623	chr11	32661959	32663075
2_wt.q.05_peak_28015	chr3	23132145	23132447
2_wt.q.05_peak_43589	chr9	29317526	29318435
2_wt.q.05_peak_25219	chr2	60863736	60864508
2_wt.q.05_peak_32299	chr4	120101182	120101658
2_wt.q.05_peak_11025	chr12	119957753	119958802
2_wt.q.05_peak_6443	chr11	25410109	25411201
2_wt.q.05_peak_16706	chr15	73535569	73536079
2_wt.q.05_peak_28327	chr3	45402364	45404080
2_wt.q.05_peak_4203	chr10	40098139	40098664
2_wt.q.05_peak_12393	chr13	76844583	76845664
2_wt.q.05_peak_14011	chr14	39106635	39106966
2_wt.q.05_peak_22084	chr18	59432721	59433974
2_wt.q.05_peak_23289	chr19	27996751	27997209
2_wt.q.05_peak_30898	chr4	28846461	28846772
2_wt.q.05_peak_3902	chr10	20733874	20734346
2_wt.q.05_peak_30608	chr4	8589085	8589696
2_wt.q.05_peak_42660	chr8	102593756	102594377
2_wt.q.05_peak_27909	chr3	16904725	16905358
2_wt.q.05_peak_21109	chr18	9390620	9391622
2_wt.q.05_peak_43737	chr9	37518829	37519448
2_wt.q.05_peak_32095	chr4	107124204	107124526
2_wt.q.05_peak_7774	chr11	83406351	83407094
2_wt.q.05_peak_6792	chr11	42806948	42807709
2_wt.q.05_peak_28131	chr3	31328067	31328812
2_wt.q.05_peak_7678	chr11	79466261	79467181
2_wt.q.05_peak_27207	chr2	148320762	148321620
2_wt.q.05_peak_4328	chr10	43322319	43322992
2_wt.q.05_peak_2690	chr1	159716573	159718207
2_wt.q.05_peak_32408	chr4	125396957	125397341
2_wt.q.05_peak_31782	chr4	87566863	87567392
2_wt.q.05_peak_44118	chr9	51660426	51661502
2_wt.q.05_peak_5586	chr10	108850307	108852018
2_wt.q.05_peak_27076	chr2	142812743	142813584
2_wt.q.05_peak_20809	chr17	84642164	84642686
2_wt.q.05_peak_20955	chr17	90568397	90570825
2_wt.q.05_peak_36935	chr6	72318405	72319241
2_wt.q.05_peak_37483	chr6	101494936	101495212
2_wt.q.05_peak_15894	chr15	34354187	34355449
2_wt.q.05_peak_34315	chr5	73359206	73359857
2_wt.q.05_peak_15679	chr15	24457525	24457858
2_wt.q.05_peak_33485	chr5	23517884	23518485
2_wt.q.05_peak_21774	chr18	41071206	41071837
2_wt.q.05_peak_26923	chr2	136085959	136086898
2_wt.q.05_peak_5569	chr10	108738327	108739165
2_wt.q.05_peak_15976	chr15	37564475	37565405
2_wt.q.05_peak_1006	chr1	58568248	58569260
2_wt.q.05_peak_14710	chr14	75747753	75748526
2_wt.q.05_peak_45284	chr9	107002848	107003918
2_wt.q.05_peak_41199	chr8	16954668	16955714
2_wt.q.05_peak_35986	chr6	16572822	16573862
2_wt.q.05_peak_25434	chr2	69084466	69085077
2_wt.q.05_peak_21983	chr18	53797081	53797668
2_wt.q.05_peak_10150	chr12	77860011	77860739
2_wt.q.05_peak_9609	chr12	49481749	49483071
2_wt.q.05_peak_38898	chr7	36060480	36061170
2_wt.q.05_peak_36051	chr6	18654123	18654992
2_wt.q.05_peak_12490	chr13	82424815	82425165
2_wt.q.05_peak_291	chr1	23953496	23953931
2_wt.q.05_peak_7281	chr11	67098000	67099133
2_wt.q.05_peak_945	chr1	56066313	56067035
2_wt.q.05_peak_28326	chr3	45400030	45401836
2_wt.q.05_peak_34740	chr5	103167108	103168103
2_wt.q.05_peak_35836	chr5	151110183	151111067
2_wt.q.05_peak_23735	chr19	49374231	49375429
2_wt.q.05_peak_17029	chr15	83989493	83990102
2_wt.q.05_peak_12067	chr13	56057819	56058262
2_wt.q.05_peak_10565	chr12	97740783	97741205
2_wt.q.05_peak_13115	chr13	105044003	105044273
2_wt.q.05_peak_42971	chr8	121624531	121624890
2_wt.q.05_peak_343	chr1	25268847	25270019
2_wt.q.05_peak_31336	chr4	58400748	58402595
2_wt.q.05_peak_4128	chr10	33557452	33558804
2_wt.q.05_peak_42310	chr8	83679558	83680512
2_wt.q.05_peak_44151	chr9	52730822	52731335
2_wt.q.05_peak_4800	chr10	74414894	74415456
2_wt.q.05_peak_15352	chr14	121168672	121169035
2_wt.q.05_peak_5584	chr10	108835928	108836379
2_wt.q.05_peak_27180	chr2	146280694	146281010
2_wt.q.05_peak_36968	chr6	76697133	76697400
2_wt.q.05_peak_42466	chr8	87512521	87513525
2_wt.q.05_peak_5057	chr10	85161143	85162227
2_wt.q.05_peak_39235	chr7	58866462	58867039
2_wt.q.05_peak_41972	chr8	66785362	66786810
2_wt.q.05_peak_19067	chr16	82385377	82385861
2_wt.q.05_peak_35328	chr5	127705716	127706034
2_wt.q.05_peak_41983	chr8	67437406	67440042
2_wt.q.05_peak_28175	chr3	33741770	33743224
2_wt.q.05_peak_23092	chr19	17694374	17695037
2_wt.q.05_peak_10286	chr12	82970535	82971669
2_wt.q.05_peak_10967	chr12	117026973	117027241
2_wt.q.05_peak_46195	chrX	132126194	132126646
2_wt.q.05_peak_24163	chr2	7548795	7549076
2_wt.q.05_peak_25062	chr2	50134722	50135194
2_wt.q.05_peak_23196	chr19	23162286	23162749
2_wt.q.05_peak_7283	chr11	67163514	67164569
2_wt.q.05_peak_25274	chr2	62547945	62549769
2_wt.q.05_peak_10463	chr12	89751056	89752060
2_wt.q.05_peak_273	chr1	23152097	23152755
2_wt.q.05_peak_18919	chr16	72429790	72430795
2_wt.q.05_peak_34255	chr5	71136720	71137482
2_wt.q.05_peak_20109	chr17	45400848	45401363
2_wt.q.05_peak_19612	chr17	17498871	17499510
2_wt.q.05_peak_42006	chr8	67870948	67872232
2_wt.q.05_peak_35165	chr5	122786000	122786774
2_wt.q.05_peak_42646	chr8	101767158	101768462
2_wt.q.05_peak_16232	chr15	48843078	48843882
2_wt.q.05_peak_13148	chr13	106734334	106734958
2_wt.q.05_peak_30393	chr3	152971665	152972165
2_wt.q.05_peak_37384	chr6	96347996	96348404
2_wt.q.05_peak_40645	chr7	127055059	127055376
2_wt.q.05_peak_30055	chr3	135914658	135915227
2_wt.q.05_peak_32120	chr4	108336695	108338696
2_wt.q.05_peak_375	chr1	27048157	27048887
2_wt.q.05_peak_42272	chr8	82616825	82617525
2_wt.q.05_peak_45245	chr9	106290616	106291193
2_wt.q.05_peak_7937	chr11	90255728	90256202
2_wt.q.05_peak_3710	chr10	11659891	11661696
2_wt.q.05_peak_44447	chr9	63632399	63633694
2_wt.q.05_peak_2750	chr1	161663630	161663925
2_wt.q.05_peak_25446	chr2	69773614	69774040
2_wt.q.05_peak_11893	chr13	47134669	47135753
2_wt.q.05_peak_6800	chr11	43190064	43190377
2_wt.q.05_peak_13515	chr14	13590316	13592525
2_wt.q.05_peak_44735	chr9	75430498	75431949
2_wt.q.05_peak_33149	chr5	4578469	4579360
2_wt.q.05_peak_41205	chr8	17097122	17097997
2_wt.q.05_peak_30276	chr3	144578716	144579489
2_wt.q.05_peak_36575	chr6	43644377	43646678
2_wt.q.05_peak_38390	chr6	146958516	146959258
2_wt.q.05_peak_15733	chr15	26730330	26730804
2_wt.q.05_peak_44126	chr9	51922519	51923363
2_wt.q.05_peak_18464	chr16	39445408	39446338
2_wt.q.05_peak_28831	chr3	79435924	79436929
2_wt.q.05_peak_5948	chr10	125839796	125840778
2_wt.q.05_peak_1937	chr1	126317402	126318327
2_wt.q.05_peak_6273	chr11	16344298	16345257
2_wt.q.05_peak_30863	chr4	26760494	26760766
2_wt.q.05_peak_25349	chr2	65877518	65877946
2_wt.q.05_peak_43423	chr9	24337195	24338344
2_wt.q.05_peak_37400	chr6	98240132	98241818
2_wt.q.05_peak_3933	chr10	21727020	21727899
2_wt.q.05_peak_7230	chr11	62636533	62637244
2_wt.q.05_peak_24170	chr2	7733635	7735801
2_wt.q.05_peak_1877	chr1	121435964	121436643
2_wt.q.05_peak_35799	chr5	149560972	149562057
2_wt.q.05_peak_16113	chr15	41675206	41676639
2_wt.q.05_peak_44606	chr9	70364683	70366159
2_wt.q.05_peak_44145	chr9	52407777	52408278
2_wt.q.05_peak_17459	chr15	100829016	100830278
2_wt.q.05_peak_35842	chr5	151396013	151396523
2_wt.q.05_peak_18630	chr16	49812948	49813618
2_wt.q.05_peak_28021	chr3	24540280	24540857
2_wt.q.05_peak_42296	chr8	83243618	83244637
2_wt.q.05_peak_37012	chr6	80188312	80188912
2_wt.q.05_peak_23413	chr19	36320967	36321623
2_wt.q.05_peak_46390	chrX	167146871	167147231
2_wt.q.05_peak_1969	chr1	128003872	128004471
2_wt.q.05_peak_35332	chr5	127956419	127956944
2_wt.q.05_peak_9570	chr12	45399369	45400210
2_wt.q.05_peak_39915	chr7	93383955	93384347
2_wt.q.05_peak_15903	chr15	34667792	34669766
2_wt.q.05_peak_20710	chr17	80235105	80236044
2_wt.q.05_peak_39697	chr7	84623933	84624610
2_wt.q.05_peak_4238	chr10	40814107	40814550
2_wt.q.05_peak_19079	chr16	83422622	83423747
2_wt.q.05_peak_45924	chrX	39189217	39189892
2_wt.q.05_peak_9074	chr12	13939299	13940404
2_wt.q.05_peak_28228	chr3	36737877	36738508
2_wt.q.05_peak_6552	chr11	30733026	30734135
2_wt.q.05_peak_41726	chr8	47783265	47784682
2_wt.q.05_peak_44637	chr9	71018049	71018477
2_wt.q.05_peak_23146	chr19	21476846	21478623
2_wt.q.05_peak_23049	chr19	14484656	14485454
2_wt.q.05_peak_16026	chr15	38931308	38932536
2_wt.q.05_peak_9789	chr12	59259940	59260993
2_wt.q.05_peak_15619	chr15	18764241	18764919
2_wt.q.05_peak_27087	chr2	143113782	143114769
2_wt.q.05_peak_15364	chr14	121566663	121567748
2_wt.q.05_peak_45011	chr9	94972260	94973328
2_wt.q.05_peak_44251	chr9	56712022	56712627
2_wt.q.05_peak_41976	chr8	66876728	66877553
2_wt.q.05_peak_27200	chr2	148206023	148206885
2_wt.q.05_peak_24367	chr2	19646552	19647115
2_wt.q.05_peak_28858	chr3	80032803	80033871
2_wt.q.05_peak_28331	chr3	45620586	45621252
2_wt.q.05_peak_22467	chr18	72301713	72302086
2_wt.q.05_peak_29902	chr3	127027994	127029884
2_wt.q.05_peak_25359	chr2	65962713	65963569
2_wt.q.05_peak_15845	chr15	31329576	31330949
2_wt.q.05_peak_607	chr1	39338766	39340575
2_wt.q.05_peak_881	chr1	53908868	53909757
2_wt.q.05_peak_20533	chr17	70473499	70474056
2_wt.q.05_peak_731	chr1	45473012	45473637
2_wt.q.05_peak_26718	chr2	129654490	129655542
2_wt.q.05_peak_26295	chr2	110896385	110897801
2_wt.q.05_peak_11690	chr13	41902939	41903763
2_wt.q.05_peak_33581	chr5	28241277	28241542
2_wt.q.05_peak_36142	chr6	27938717	27939297
2_wt.q.05_peak_5140	chr10	90607312	90608172
2_wt.q.05_peak_27763	chr2	180904262	180905344
2_wt.q.05_peak_18743	chr16	59393128	59393697
2_wt.q.05_peak_5784	chr10	116117462	116117760
2_wt.q.05_peak_6842	chr11	46134612	46135641
2_wt.q.05_peak_5580	chr10	108812119	108812837
2_wt.q.05_peak_28828	chr3	79313710	79314689
2_wt.q.05_peak_23877	chr19	57352575	57352878
2_wt.q.05_peak_4026	chr10	27804511	27805609
2_wt.q.05_peak_5405	chr10	99450997	99452182
2_wt.q.05_peak_11247	chr13	15777391	15778215
2_wt.q.05_peak_24609	chr2	30919765	30920715
2_wt.q.05_peak_33197	chr5	8095183	8095945
2_wt.q.05_peak_854	chr1	52597374	52598125
2_wt.q.05_peak_19058	chr16	81041168	81041552
2_wt.q.05_peak_40408	chr7	118175677	118176191
2_wt.q.05_peak_5670	chr10	110391259	110391527
2_wt.q.05_peak_12713	chr13	92656653	92657379
2_wt.q.05_peak_2649	chr1	158397258	158397566
2_wt.q.05_peak_46125	chrX	100517090	100517731
2_wt.q.05_peak_44188	chr9	53932632	53933670
2_wt.q.05_peak_36528	chr6	41055820	41056837
2_wt.q.05_peak_43070	chr8	124392674	124393183
2_wt.q.05_peak_25622	chr2	77183349	77184101
2_wt.q.05_peak_33802	chr5	37251986	37252685
2_wt.q.05_peak_753	chr1	46999131	46999877
2_wt.q.05_peak_12306	chr13	69784340	69784811
2_wt.q.05_peak_11352	chr13	20537781	20540295
2_wt.q.05_peak_23097	chr19	18020577	18020849
2_wt.q.05_peak_27844	chr3	8998760	8999063
2_wt.q.05_peak_36408	chr6	36842902	36845007
2_wt.q.05_peak_14656	chr14	73620615	73621547
2_wt.q.05_peak_11777	chr13	43530332	43531191
2_wt.q.05_peak_1134	chr1	64716743	64717708
2_wt.q.05_peak_12263	chr13	68793386	68794046
2_wt.q.05_peak_13577	chr14	18061733	18063295
2_wt.q.05_peak_36811	chr6	59010660	59011559
2_wt.q.05_peak_14001	chr14	38846347	38847907
2_wt.q.05_peak_25982	chr2	92954616	92954887
2_wt.q.05_peak_19295	chr16	95814457	95814836
2_wt.q.05_peak_28031	chr3	25426681	25427599
2_wt.q.05_peak_36851	chr6	65072715	65073018
2_wt.q.05_peak_991	chr1	57606304	57607275
2_wt.q.05_peak_8737	chr11	117751775	117752085
2_wt.q.05_peak_23460	chr19	37265411	37266264
2_wt.q.05_peak_42658	chr8	102487481	102489337
2_wt.q.05_peak_21299	chr18	22985026	22985661
2_wt.q.05_peak_19415	chr17	5519982	5520675
2_wt.q.05_peak_498	chr1	35995258	35995783
2_wt.q.05_peak_28313	chr3	42905837	42906654
2_wt.q.05_peak_32999	chr4	150508643	150510715
2_wt.q.05_peak_41490	chr8	35662252	35662880
2_wt.q.05_peak_38153	chr6	135385844	135387912
2_wt.q.05_peak_44481	chr9	65036810	65037499
2_wt.q.05_peak_3420	chr1	191591656	191593097
2_wt.q.05_peak_891	chr1	54106760	54107188
2_wt.q.05_peak_33358	chr5	20217293	20217632
2_wt.q.05_peak_35749	chr5	147506649	147508013
2_wt.q.05_peak_40228	chr7	111268420	111268689
2_wt.q.05_peak_33828	chr5	39214408	39214996
2_wt.q.05_peak_36653	chr6	50400018	50400614
2_wt.q.05_peak_45994	chrX	64940702	64941669
2_wt.q.05_peak_25876	chr2	90959602	90960875
2_wt.q.05_peak_5310	chr10	97767720	97768796
2_wt.q.05_peak_14973	chr14	98524262	98524662
2_wt.q.05_peak_41062	chr8	11421622	11422067
2_wt.q.05_peak_12322	chr13	70713942	70714876
2_wt.q.05_peak_34461	chr5	82698587	82699315
2_wt.q.05_peak_10956	chr12	116618606	116620064
2_wt.q.05_peak_5859	chr10	120155739	120156196
2_wt.q.05_peak_11300	chr13	18457010	18457317
2_wt.q.05_peak_39794	chr7	90841037	90842139
2_wt.q.05_peak_44024	chr9	47761584	47761890
2_wt.q.05_peak_41792	chr8	54863998	54864993
2_wt.q.05_peak_1200	chr1	67033666	67034299
2_wt.q.05_peak_37598	chr6	108130622	108131524
2_wt.q.05_peak_747	chr1	46936533	46938635
2_wt.q.05_peak_8010	chr11	94206498	94207545
2_wt.q.05_peak_34666	chr5	99354591	99355354
2_wt.q.05_peak_28945	chr3	82099351	82099689
2_wt.q.05_peak_1427	chr1	82737244	82738270
2_wt.q.05_peak_14817	chr14	78678122	78678433
2_wt.q.05_peak_45208	chr9	105275213	105275856
2_wt.q.05_peak_34125	chr5	63169804	63170626
2_wt.q.05_peak_30339	chr3	149223553	149224586
2_wt.q.05_peak_36783	chr6	57684015	57684849
2_wt.q.05_peak_16127	chr15	42429533	42430668
2_wt.q.05_peak_25322	chr2	65399911	65400442
2_wt.q.05_peak_4614	chr10	65948374	65949245
2_wt.q.05_peak_27022	chr2	140202112	140202670
2_wt.q.05_peak_9947	chr12	70325680	70326152
2_wt.q.05_peak_12320	chr13	70675112	70675758
2_wt.q.05_peak_36762	chr6	55944434	55945246
2_wt.q.05_peak_5144	chr10	90636987	90637702
2_wt.q.05_peak_29016	chr3	85024990	85025655
2_wt.q.05_peak_32172	chr4	111001341	111002331
2_wt.q.05_peak_5983	chr10	127225693	127226436
2_wt.q.05_peak_37262	chr6	91518628	91519215
2_wt.q.05_peak_5462	chr10	105228138	105229084
2_wt.q.05_peak_18374	chr16	36927036	36927646
2_wt.q.05_peak_29061	chr3	85629837	85631206
2_wt.q.05_peak_1162	chr1	66205403	66206039
2_wt.q.05_peak_9143	chr12	17241607	17242147
2_wt.q.05_peak_40378	chr7	117174656	117175768
2_wt.q.05_peak_29312	chr3	96152353	96153101
2_wt.q.05_peak_877	chr1	53823140	53824630
2_wt.q.05_peak_33355	chr5	20133459	20134134
2_wt.q.05_peak_40689	chr7	128452404	128453209
2_wt.q.05_peak_19110	chr16	85487501	85488093
2_wt.q.05_peak_16668	chr15	71681912	71682473
2_wt.q.05_peak_15508	chr15	11429667	11430519
2_wt.q.05_peak_23496	chr19	40629789	40630577
2_wt.q.05_peak_19599	chr17	16041569	16041944
2_wt.q.05_peak_42184	chr8	73626552	73627470
2_wt.q.05_peak_28941	chr3	82051483	82052058
2_wt.q.05_peak_10978	chr12	117236039	117237096
2_wt.q.05_peak_39130	chr7	50482143	50482460
2_wt.q.05_peak_2605	chr1	157248029	157249000
2_wt.q.05_peak_381	chr1	27478289	27479484
2_wt.q.05_peak_15307	chr14	120374202	120375312
2_wt.q.05_peak_9090	chr12	15681310	15682271
2_wt.q.05_peak_1457	chr1	83653331	83654627
2_wt.q.05_peak_37679	chr6	110817863	110818945
2_wt.q.05_peak_35858	chr6	4925491	4926874
2_wt.q.05_peak_22969	chr19	9966742	9967058
2_wt.q.05_peak_16383	chr15	58663733	58664368
2_wt.q.05_peak_14566	chr14	68973789	68974665
2_wt.q.05_peak_18883	chr16	68639950	68640248
2_wt.q.05_peak_11123	chr13	9450012	9451788
2_wt.q.05_peak_42344	chr8	84458844	84460276
2_wt.q.05_peak_23147	chr19	21479454	21480367
2_wt.q.05_peak_12082	chr13	57846309	57847146
2_wt.q.05_peak_12872	chr13	97397077	97397372
2_wt.q.05_peak_30587	chr4	6878679	6880014
2_wt.q.05_peak_1831	chr1	113372451	113373723
2_wt.q.05_peak_7308	chr11	67723078	67724194
2_wt.q.05_peak_16252	chr15	51598038	51598450
2_wt.q.05_peak_26885	chr2	134895764	134898156
2_wt.q.05_peak_9993	chr12	71693508	71694074
2_wt.q.05_peak_8598	chr11	111281174	111282630
2_wt.q.05_peak_7961	chr11	90863631	90864796
2_wt.q.05_peak_299	chr1	24107407	24108439
2_wt.q.05_peak_26289	chr2	110806540	110806820
2_wt.q.05_peak_22080	chr18	59358862	59359788
2_wt.q.05_peak_16735	chr15	74619154	74620281
2_wt.q.05_peak_22617	chr18	80899512	80900224
2_wt.q.05_peak_21217	chr18	15505155	15505793
2_wt.q.05_peak_17661	chr16	7419320	7420230
2_wt.q.05_peak_4012	chr10	27117637	27117950
2_wt.q.05_peak_21530	chr18	34849547	34850246
2_wt.q.05_peak_20980	chr17	90904421	90905258
2_wt.q.05_peak_36310	chr6	32442645	32444119
2_wt.q.05_peak_44970	chr9	92671976	92672854
2_wt.q.05_peak_9702	chr12	52818465	52819241
2_wt.q.05_peak_20527	chr17	70442641	70443780
2_wt.q.05_peak_39348	chr7	65639316	65640592
2_wt.q.05_peak_1809	chr1	107728420	107728887
2_wt.q.05_peak_9539	chr12	44324508	44326322
2_wt.q.05_peak_6173	chr11	6313441	6314531
2_wt.q.05_peak_39260	chr7	63344999	63346688
2_wt.q.05_peak_2232	chr1	137664318	137665464
2_wt.q.05_peak_33624	chr5	31079686	31080880
2_wt.q.05_peak_27565	chr2	164994897	164995245
2_wt.q.05_peak_29026	chr3	85188117	85189703
2_wt.q.05_peak_7130	chr11	59218193	59218946
2_wt.q.05_peak_34671	chr5	99459129	99459541
2_wt.q.05_peak_12435	chr13	78655980	78659034
2_wt.q.05_peak_4635	chr10	67196844	67197985
2_wt.q.05_peak_37755	chr6	113614939	113615637
2_wt.q.05_peak_16797	chr15	77069229	77069563
2_wt.q.05_peak_6484	chr11	28014247	28014882
2_wt.q.05_peak_45879	chrX	19152732	19153014
2_wt.q.05_peak_26441	chr2	117145342	117146730
2_wt.q.05_peak_45336	chr9	108128545	108129868
2_wt.q.05_peak_37176	chr6	88027043	88028085
2_wt.q.05_peak_35952	chr6	13746254	13747679
2_wt.q.05_peak_36215	chr6	29960944	29961843
2_wt.q.05_peak_36988	chr6	77457456	77458974
2_wt.q.05_peak_33862	chr5	42271005	42271283
2_wt.q.05_peak_27165	chr2	145683783	145684775
2_wt.q.05_peak_18819	chr16	65214336	65214828
2_wt.q.05_peak_24859	chr2	42526699	42528003
2_wt.q.05_peak_44176	chr9	53397971	53398292
2_wt.q.05_peak_25011	chr2	46365383	46366798
2_wt.q.05_peak_5535	chr10	108558297	108559541
2_wt.q.05_peak_36773	chr6	56907983	56908708
2_wt.q.05_peak_45534	chr9	112860528	112861625
2_wt.q.05_peak_29043	chr3	85378755	85379905
2_wt.q.05_peak_3332	chr1	184919673	184920729
2_wt.q.05_peak_17866	chr16	17031416	17032680
2_wt.q.05_peak_19462	chr17	8652812	8653388
2_wt.q.05_peak_6631	chr11	33627283	33627738
2_wt.q.05_peak_41413	chr8	31069507	31069807
2_wt.q.05_peak_11623	chr13	36531753	36533717
2_wt.q.05_peak_6335	chr11	21016617	21016968
2_wt.q.05_peak_13046	chr13	102533408	102533865
2_wt.q.05_peak_37956	chr6	120503581	120504687
2_wt.q.05_peak_9280	chr12	29695282	29696251
2_wt.q.05_peak_4250	chr10	40908425	40909500
2_wt.q.05_peak_26433	chr2	117017081	117019398
2_wt.q.05_peak_3394	chr1	190846330	190846790
2_wt.q.05_peak_8657	chr11	115481474	115482460
2_wt.q.05_peak_39761	chr7	89662510	89663693
2_wt.q.05_peak_20470	chr17	67458921	67459219
2_wt.q.05_peak_4480	chr10	58479475	58481466
2_wt.q.05_peak_1352	chr1	77567411	77568259
2_wt.q.05_peak_39018	chr7	45328851	45329234
2_wt.q.05_peak_1101	chr1	63933773	63935390
2_wt.q.05_peak_42955	chr8	119952416	119953603
2_wt.q.05_peak_7088	chr11	57043812	57044158
2_wt.q.05_peak_20981	chr17	90905619	90905890
2_wt.q.05_peak_36455	chr6	38263283	38264211
2_wt.q.05_peak_32670	chr4	133729090	133730438
2_wt.q.05_peak_40758	chr7	132501585	132502667
2_wt.q.05_peak_25790	chr2	84510751	84511997
2_wt.q.05_peak_1370	chr1	79336964	79337437
2_wt.q.05_peak_115	chr1	12009087	12009612
2_wt.q.05_peak_21739	chr18	39908727	39909343
2_wt.q.05_peak_24430	chr2	22038646	22039207
2_wt.q.05_peak_24012	chr2	5610240	5610862
2_wt.q.05_peak_16038	chr15	39401413	39402899
2_wt.q.05_peak_12627	chr13	88026735	88027309
2_wt.q.05_peak_21276	chr18	21202585	21203140
2_wt.q.05_peak_12261	chr13	68758359	68759584
2_wt.q.05_peak_33507	chr5	23911170	23912027
2_wt.q.05_peak_12802	chr13	94490623	94491298
2_wt.q.05_peak_5230	chr10	93227472	93228580
2_wt.q.05_peak_4241	chr10	40830555	40832393
2_wt.q.05_peak_13839	chr14	28413114	28413810
2_wt.q.05_peak_1681	chr1	97636989	97637810
2_wt.q.05_peak_1442	chr1	83353929	83354731
2_wt.q.05_peak_11415	chr13	22402918	22403588
2_wt.q.05_peak_18343	chr16	34999395	34999771
2_wt.q.05_peak_13996	chr14	38710682	38711440
2_wt.q.05_peak_36997	chr6	77862979	77864198
2_wt.q.05_peak_29006	chr3	84972952	84974064
2_wt.q.05_peak_6715	chr11	40889653	40890866
2_wt.q.05_peak_31149	chr4	46061141	46062107
2_wt.q.05_peak_5513	chr10	107992118	107993197
2_wt.q.05_peak_45830	chrX	12439512	12440243
2_wt.q.05_peak_3033	chr1	171775246	171776057
2_wt.q.05_peak_22996	chr19	10800657	10801116
2_wt.q.05_peak_8455	chr11	106177730	106178567
2_wt.q.05_peak_19183	chr16	90958298	90959725
2_wt.q.05_peak_12006	chr13	54559563	54561026
2_wt.q.05_peak_43158	chr8	128165135	128165501
2_wt.q.05_peak_35338	chr5	128204841	128205648
2_wt.q.05_peak_4063	chr10	29344154	29344645
2_wt.q.05_peak_17762	chr16	11460353	11462423
2_wt.q.05_peak_31459	chr4	69105013	69106012
2_wt.q.05_peak_42848	chr8	111201151	111201964
2_wt.q.05_peak_25103	chr2	52938741	52939000
2_wt.q.05_peak_43991	chr9	46082121	46082831
2_wt.q.05_peak_2660	chr1	158581739	158582471
2_wt.q.05_peak_18938	chr16	73784502	73784771
2_wt.q.05_peak_10367	chr12	85956033	85957390
2_wt.q.05_peak_25463	chr2	69994704	69995267
2_wt.q.05_peak_14406	chr14	64409147	64410167
2_wt.q.05_peak_25513	chr2	71867860	71868421
2_wt.q.05_peak_11179	chr13	12044447	12045055
2_wt.q.05_peak_3986	chr10	25742395	25742738
2_wt.q.05_peak_919	chr1	55399656	55400312
2_wt.q.05_peak_5399	chr10	99356743	99357031
2_wt.q.05_peak_5372	chr10	98996299	98996613
2_wt.q.05_peak_2994	chr1	170807027	170808390
2_wt.q.05_peak_39302	chr7	64631321	64632121
2_wt.q.05_peak_13063	chr13	103199434	103200637
2_wt.q.05_peak_12784	chr13	93607164	93608445
2_wt.q.05_peak_13250	chr13	110651131	110652322
2_wt.q.05_peak_25850	chr2	90613305	90615100
2_wt.q.05_peak_17429	chr15	100198967	100199581
2_wt.q.05_peak_528	chr1	37350897	37352104
2_wt.q.05_peak_12272	chr13	68913723	68914205
2_wt.q.05_peak_22309	chr18	67503490	67504682
2_wt.q.05_peak_13995	chr14	38546324	38547491
2_wt.q.05_peak_37642	chr6	108557096	108558031
2_wt.q.05_peak_30833	chr4	25012481	25013287
2_wt.q.05_peak_25469	chr2	70210649	70211171
2_wt.q.05_peak_3459	chr1	192421462	192422100
2_wt.q.05_peak_32051	chr4	104538355	104539095
2_wt.q.05_peak_9822	chr12	64393005	64393646
2_wt.q.05_peak_43460	chr9	25408353	25409365
2_wt.q.05_peak_38165	chr6	135823321	135824061
2_wt.q.05_peak_20255	chr17	54753013	54753581
2_wt.q.05_peak_44674	chr9	72758774	72759518
2_wt.q.05_peak_42047	chr8	69121413	69122803
2_wt.q.05_peak_4239	chr10	40826248	40826788
2_wt.q.05_peak_3968	chr10	24984865	24985539
2_wt.q.05_peak_39511	chr7	78027032	78027439
2_wt.q.05_peak_15449	chr15	6000988	6002453
2_wt.q.05_peak_26948	chr2	136658543	136659003
2_wt.q.05_peak_16278	chr15	53048576	53049265
2_wt.q.05_peak_29037	chr3	85314131	85314443
2_wt.q.05_peak_7655	chr11	78730846	78731127
2_wt.q.05_peak_7100	chr11	57313251	57314784
2_wt.q.05_peak_7142	chr11	59669248	59669849
2_wt.q.05_peak_30750	chr4	16699860	16700946
2_wt.q.05_peak_30202	chr3	141653416	141654012
2_wt.q.05_peak_46255	chrX	150981360	150982223
2_wt.q.05_peak_20192	chr17	49029949	49030504
2_wt.q.05_peak_2275	chr1	140294384	140296534
2_wt.q.05_peak_21262	chr18	20726901	20727196
2_wt.q.05_peak_12016	chr13	54752503	54752776
2_wt.q.05_peak_14486	chr14	66228124	66230307
2_wt.q.05_peak_21345	chr18	24733280	24734250
2_wt.q.05_peak_17658	chr16	7279367	7279975
2_wt.q.05_peak_23737	chr19	49681043	49681607
2_wt.q.05_peak_31600	chr4	80636126	80636858
2_wt.q.05_peak_5377	chr10	99016314	99016902
2_wt.q.05_peak_32815	chr4	138582647	138583041
2_wt.q.05_peak_7300	chr11	67637125	67637925
2_wt.q.05_peak_1462	chr1	83851011	83851759
2_wt.q.05_peak_27983	chr3	21045507	21046617
2_wt.q.05_peak_3056	chr1	172319269	172319778
2_wt.q.05_peak_16214	chr15	47990904	47991169
2_wt.q.05_peak_41623	chr8	42103700	42104546
2_wt.q.05_peak_24708	chr2	33444598	33445140
2_wt.q.05_peak_30027	chr3	134014350	134014781
2_wt.q.05_peak_37210	chr6	89160498	89161502
2_wt.q.05_peak_25538	chr2	72588536	72589312
2_wt.q.05_peak_4761	chr10	71249822	71250841
2_wt.q.05_peak_36056	chr6	18817060	18817724
2_wt.q.05_peak_29683	chr3	116940478	116941280
2_wt.q.05_peak_36782	chr6	57605062	57606362
2_wt.q.05_peak_18955	chr16	74869958	74870613
2_wt.q.05_peak_22730	chr18	89743332	89743719
2_wt.q.05_peak_24516	chr2	27901391	27901944
2_wt.q.05_peak_20758	chr17	81493121	81494293
2_wt.q.05_peak_12986	chr13	99829528	99831051
2_wt.q.05_peak_43297	chr9	16039796	16040670
2_wt.q.05_peak_28770	chr3	73395898	73397063
2_wt.q.05_peak_2134	chr1	134240977	134241291
2_wt.q.05_peak_21779	chr18	41192525	41193943
2_wt.q.05_peak_33219	chr5	9540761	9541497
2_wt.q.05_peak_44746	chr9	75658144	75658534
2_wt.q.05_peak_39972	chr7	97708699	97709262
2_wt.q.05_peak_21106	chr18	9305651	9306357
2_wt.q.05_peak_2278	chr1	140397517	140398209
2_wt.q.05_peak_34207	chr5	67348344	67349303
2_wt.q.05_peak_43757	chr9	37674652	37675417
2_wt.q.05_peak_10513	chr12	94644945	94645484
2_wt.q.05_peak_42688	chr8	104048331	104049730
2_wt.q.05_peak_8527	chr11	108312588	108313317
2_wt.q.05_peak_41308	chr8	24212370	24213519
2_wt.q.05_peak_758	chr1	47112251	47113903
2_wt.q.05_peak_45679	chr9	120360727	120362325
2_wt.q.05_peak_9642	chr12	50564994	50565279
2_wt.q.05_peak_32657	chr4	133378665	133379106
2_wt.q.05_peak_28315	chr3	43160284	43161519
2_wt.q.05_peak_36140	chr6	27788824	27789936
2_wt.q.05_peak_42045	chr8	69115736	69116142
2_wt.q.05_peak_38867	chr7	34308643	34309531
2_wt.q.05_peak_43911	chr9	43536791	43537280
2_wt.q.05_peak_6858	chr11	46313974	46315077
2_wt.q.05_peak_25519	chr2	71985302	71986304
2_wt.q.05_peak_34337	chr5	73875539	73876230
2_wt.q.05_peak_45490	chr9	112176892	112177381
2_wt.q.05_peak_40379	chr7	117259436	117260697
2_wt.q.05_peak_11980	chr13	53956336	53956753
2_wt.q.05_peak_20102	chr17	44842008	44843042
2_wt.q.05_peak_13584	chr14	18291993	18292583
2_wt.q.05_peak_37306	chr6	92569028	92569836
2_wt.q.05_peak_6874	chr11	47917178	47917653
2_wt.q.05_peak_43416	chr9	24211387	24212682
2_wt.q.05_peak_20750	chr17	80982190	80982695
2_wt.q.05_peak_43587	chr9	29296402	29296925
2_wt.q.05_peak_43003	chr8	122906227	122906830
2_wt.q.05_peak_35809	chr5	150167611	150167896
2_wt.q.05_peak_7316	chr11	68477861	68479252
2_wt.q.05_peak_46131	chrX	101309258	101309548
2_wt.q.05_peak_29905	chr3	127038314	127039397
2_wt.q.05_peak_35339	chr5	128211359	128211643
2_wt.q.05_peak_24564	chr2	29879953	29880448
2_wt.q.05_peak_6993	chr11	52536376	52537340
2_wt.q.05_peak_26623	chr2	124330845	124331539
2_wt.q.05_peak_22668	chr18	84914910	84915334
2_wt.q.05_peak_17017	chr15	83417340	83418347
2_wt.q.05_peak_41295	chr8	23745837	23746821
2_wt.q.05_peak_3031	chr1	171715352	171715904
2_wt.q.05_peak_5667	chr10	110342008	110343528
2_wt.q.05_peak_687	chr1	43153326	43154052
2_wt.q.05_peak_27204	chr2	148292548	148293685
2_wt.q.05_peak_22379	chr18	69138831	69139274
2_wt.q.05_peak_43738	chr9	37519788	37520486
2_wt.q.05_peak_30813	chr4	22923898	22924969
2_wt.q.05_peak_26906	chr2	135676517	135677550
2_wt.q.05_peak_31551	chr4	76810894	76811520
2_wt.q.05_peak_2618	chr1	157470439	157471461
2_wt.q.05_peak_42686	chr8	104027352	104027678
2_wt.q.05_peak_14415	chr14	64501459	64501980
2_wt.q.05_peak_35411	chr5	130957981	130958720
2_wt.q.05_peak_43744	chr9	37567534	37569504
2_wt.q.05_peak_4692	chr10	69576705	69577896
2_wt.q.05_peak_16194	chr15	45101922	45104110
2_wt.q.05_peak_31406	chr4	65975767	65977734
2_wt.q.05_peak_39228	chr7	58557052	58557827
2_wt.q.05_peak_17178	chr15	91440195	91440927
2_wt.q.05_peak_13015	chr13	101225289	101225859
2_wt.q.05_peak_40983	chr8	7994709	7995558
2_wt.q.05_peak_4499	chr10	59114170	59116254
2_wt.q.05_peak_6121	chr11	5041240	5041992
2_wt.q.05_peak_1044	chr1	60469166	60470248
2_wt.q.05_peak_44584	chr9	68866183	68867125
2_wt.q.05_peak_39574	chr7	80111850	80112291
2_wt.q.05_peak_30318	chr3	146710947	146711829
2_wt.q.05_peak_29054	chr3	85569850	85571775
2_wt.q.05_peak_10460	chr12	89701335	89701718
2_wt.q.05_peak_18627	chr16	49736267	49737305
2_wt.q.05_peak_1909	chr1	124035690	124036924
2_wt.q.05_peak_21191	chr18	12947968	12948332
2_wt.q.05_peak_37399	chr6	98212087	98212366
2_wt.q.05_peak_5081	chr10	87212165	87213359
2_wt.q.05_peak_27483	chr2	160717554	160718737
2_wt.q.05_peak_40714	chr7	130493374	130494498
2_wt.q.05_peak_26915	chr2	135978098	135978854
2_wt.q.05_peak_15127	chr14	105783091	105783669
2_wt.q.05_peak_11101	chr13	8784274	8785327
2_wt.q.05_peak_25081	chr2	52495300	52495671
2_wt.q.05_peak_26888	chr2	134965903	134966827
2_wt.q.05_peak_29048	chr3	85489609	85490655
2_wt.q.05_peak_36191	chr6	28996454	28997451
2_wt.q.05_peak_37316	chr6	92663219	92664293
2_wt.q.05_peak_29311	chr3	96118012	96118611
2_wt.q.05_peak_27884	chr3	13713782	13714825
2_wt.q.05_peak_16188	chr15	44923909	44924793
2_wt.q.05_peak_232	chr1	21679062	21679920
2_wt.q.05_peak_32478	chr4	127707491	127708742
2_wt.q.05_peak_19540	chr17	12844134	12844983
2_wt.q.05_peak_6533	chr11	29812838	29813988
2_wt.q.05_peak_37542	chr6	104916068	104917238
2_wt.q.05_peak_41758	chr8	54095993	54096780
2_wt.q.05_peak_8622	chr11	113334332	113335852
2_wt.q.05_peak_42685	chr8	104022656	104023725
2_wt.q.05_peak_39799	chr7	91045221	91046037
2_wt.q.05_peak_17778	chr16	12209556	12210244
2_wt.q.05_peak_2572	chr1	156623917	156625060
2_wt.q.05_peak_31752	chr4	87035103	87036294
2_wt.q.05_peak_26358	chr2	114232828	114233138
2_wt.q.05_peak_21868	chr18	45646256	45646744
2_wt.q.05_peak_42696	chr8	104410782	104412098
2_wt.q.05_peak_8614	chr11	112470531	112471023
2_wt.q.05_peak_33683	chr5	32992891	32993751
2_wt.q.05_peak_5933	chr10	123918703	123919122
2_wt.q.05_peak_10195	chr12	80468005	80468837
2_wt.q.05_peak_16269	chr15	52740391	52741558
2_wt.q.05_peak_6241	chr11	12811102	12812066
2_wt.q.05_peak_16405	chr15	59520660	59521677
2_wt.q.05_peak_25920	chr2	91844120	91844665
2_wt.q.05_peak_30799	chr4	21951684	21952836
2_wt.q.05_peak_41778	chr8	54594306	54595407
2_wt.q.05_peak_39329	chr7	65235795	65236266
2_wt.q.05_peak_29267	chr3	95269129	95270261
2_wt.q.05_peak_32063	chr4	105051342	105051885
2_wt.q.05_peak_13731	chr14	23961868	23963360
2_wt.q.05_peak_29023	chr3	85159818	85160223
2_wt.q.05_peak_34700	chr5	100643547	100644421
2_wt.q.05_peak_12474	chr13	81855820	81856639
2_wt.q.05_peak_16074	chr15	40388289	40389000
2_wt.q.05_peak_2668	chr1	159217524	159217985
2_wt.q.05_peak_34211	chr5	67771770	67772161
2_wt.q.05_peak_33537	chr5	25085084	25086082
2_wt.q.05_peak_15565	chr15	12795620	12796726
2_wt.q.05_peak_40263	chr7	112165266	112165761
2_wt.q.05_peak_13820	chr14	27892256	27893183
2_wt.q.05_peak_28334	chr3	45658288	45659601
2_wt.q.05_peak_4217	chr10	40448534	40448892
2_wt.q.05_peak_5438	chr10	100795483	100796032
2_wt.q.05_peak_10420	chr12	88738426	88739285
2_wt.q.05_peak_33961	chr5	49419380	49420289
2_wt.q.05_peak_43564	chr9	28500259	28500929
2_wt.q.05_peak_25737	chr2	80592513	80593175
2_wt.q.05_peak_13561	chr14	17512871	17514236
2_wt.q.05_peak_18396	chr16	37494730	37495164
2_wt.q.05_peak_31844	chr4	93886061	93887339
2_wt.q.05_peak_3100	chr1	175323108	175323404
2_wt.q.05_peak_35012	chr5	115953980	115955677
2_wt.q.05_peak_17696	chr16	9663111	9664462
2_wt.q.05_peak_16110	chr15	41641627	41643034
2_wt.q.05_peak_6962	chr11	51624891	51625553
2_wt.q.05_peak_1087	chr1	63478584	63479392
2_wt.q.05_peak_18986	chr16	76937936	76939205
2_wt.q.05_peak_12321	chr13	70676563	70677256
2_wt.q.05_peak_19769	chr17	26650115	26650975
2_wt.q.05_peak_3589	chr10	5490483	5491178
2_wt.q.05_peak_1546	chr1	87708667	87709613
2_wt.q.05_peak_39952	chr7	96838333	96839562
2_wt.q.05_peak_12269	chr13	68892967	68893371
2_wt.q.05_peak_13240	chr13	110445950	110446997
2_wt.q.05_peak_37069	chr6	84442578	84443168
2_wt.q.05_peak_14684	chr14	74412358	74413437
2_wt.q.05_peak_22315	chr18	67577378	67579118
2_wt.q.05_peak_2730	chr1	160620425	160621013
2_wt.q.05_peak_9112	chr12	16853344	16853873
2_wt.q.05_peak_29010	chr3	84981205	84983432
2_wt.q.05_peak_31535	chr4	76192094	76192525
2_wt.q.05_peak_12893	chr13	97607232	97607935
2_wt.q.05_peak_9242	chr12	28738912	28739437
2_wt.q.05_peak_13445	chr14	10166619	10167180
2_wt.q.05_peak_12120	chr13	58934467	58935365
2_wt.q.05_peak_24449	chr2	24087317	24088593
2_wt.q.05_peak_41039	chr8	10539348	10539661
2_wt.q.05_peak_20253	chr17	54668929	54670081
2_wt.q.05_peak_23233	chr19	24719962	24720485
2_wt.q.05_peak_38176	chr6	135898800	135901728
2_wt.q.05_peak_1803	chr1	107581103	107581957
2_wt.q.05_peak_6465	chr11	26164470	26165250
2_wt.q.05_peak_41846	chr8	57887248	57888043
2_wt.q.05_peak_43483	chr9	26634830	26635809
2_wt.q.05_peak_8839	chr11	121417553	121422207
2_wt.q.05_peak_9922	chr12	70076832	70077169
2_wt.q.05_peak_3745	chr10	13782260	13783330
2_wt.q.05_peak_22669	chr18	84945514	84947016
2_wt.q.05_peak_23395	chr19	34230720	34232234
2_wt.q.05_peak_4995	chr10	82639015	82639475
2_wt.q.05_peak_15574	chr15	13136261	13136637
2_wt.q.05_peak_2816	chr1	164926354	164927746
2_wt.q.05_peak_12315	chr13	70295077	70295742
2_wt.q.05_peak_2829	chr1	165119890	165120410
2_wt.q.05_peak_41839	chr8	57569160	57570493
2_wt.q.05_peak_26426	chr2	116913745	116915024
2_wt.q.05_peak_25280	chr2	62680887	62682187
2_wt.q.05_peak_12547	chr13	83615679	83616721
2_wt.q.05_peak_19080	chr16	83703868	83704638
2_wt.q.05_peak_635	chr1	40020761	40022203
2_wt.q.05_peak_39514	chr7	78305361	78306759
2_wt.q.05_peak_15509	chr15	11748415	11749642
2_wt.q.05_peak_35397	chr5	130283219	130283587
2_wt.q.05_peak_14977	chr14	99162852	99163615
2_wt.q.05_peak_20259	chr17	55213997	55214285
2_wt.q.05_peak_44463	chr9	64528350	64528722
2_wt.q.05_peak_6215	chr11	9203468	9204187
2_wt.q.05_peak_46343	chrX	162411793	162413676
2_wt.q.05_peak_21795	chr18	42211427	42212617
2_wt.q.05_peak_7888	chr11	87337416	87338563
2_wt.q.05_peak_594	chr1	39097372	39098521
2_wt.q.05_peak_29497	chr3	105281217	105282156
2_wt.q.05_peak_25792	chr2	84528576	84530115
2_wt.q.05_peak_9130	chr12	17084393	17085824
2_wt.q.05_peak_29397	chr3	98417327	98417866
2_wt.q.05_peak_8579	chr11	110330032	110330440
2_wt.q.05_peak_5027	chr10	84089066	84089935
2_wt.q.05_peak_27210	chr2	148334710	148335048
2_wt.q.05_peak_35764	chr5	148282643	148283358
2_wt.q.05_peak_29834	chr3	123149979	123150652
2_wt.q.05_peak_22209	chr18	63943949	63944753
2_wt.q.05_peak_44972	chr9	92704458	92705468
2_wt.q.05_peak_8195	chr11	99120853	99121535
2_wt.q.05_peak_42648	chr8	101781869	101782462
2_wt.q.05_peak_42697	chr8	104412458	104413361
2_wt.q.05_peak_30255	chr3	144022808	144024237
2_wt.q.05_peak_28531	chr3	57128383	57129118
2_wt.q.05_peak_30310	chr3	146598027	146600421
2_wt.q.05_peak_23816	chr19	54479061	54479504
2_wt.q.05_peak_3472	chr1	193003729	193004812
2_wt.q.05_peak_36647	chr6	50366745	50367214
2_wt.q.05_peak_399	chr1	29182475	29183500
2_wt.q.05_peak_12878	chr13	97459295	97459865
2_wt.q.05_peak_41174	chr8	16247198	16247862
2_wt.q.05_peak_15922	chr15	35862041	35863034
2_wt.q.05_peak_41000	chr8	9096831	9097400
2_wt.q.05_peak_767	chr1	47485942	47486645
2_wt.q.05_peak_22873	chr19	6524433	6525105
2_wt.q.05_peak_44724	chr9	75247432	75248401
2_wt.q.05_peak_10531	chr12	95639918	95640382
2_wt.q.05_peak_23959	chr2	3449573	3450425
2_wt.q.05_peak_36196	chr6	29117558	29118242
2_wt.q.05_peak_6586	chr11	31899787	31900453
2_wt.q.05_peak_27236	chr2	149872267	149874155
2_wt.q.05_peak_37636	chr6	108453963	108454890
2_wt.q.05_peak_17742	chr16	10620611	10621558
2_wt.q.05_peak_39828	chr7	91295688	91297485
2_wt.q.05_peak_31495	chr4	70745578	70746424
2_wt.q.05_peak_2636	chr1	158124694	158125306
2_wt.q.05_peak_23461	chr19	37275039	37275905
2_wt.q.05_peak_714	chr1	43876874	43877827
2_wt.q.05_peak_30258	chr3	144192145	144192913
2_wt.q.05_peak_746	chr1	46912381	46912884
2_wt.q.05_peak_11190	chr13	12165965	12166977
2_wt.q.05_peak_1524	chr1	86913258	86914606
2_wt.q.05_peak_3903	chr10	20750651	20751312
2_wt.q.05_peak_25907	chr2	91389645	91389978
2_wt.q.05_peak_1066	chr1	61695967	61696705
2_wt.q.05_peak_18814	chr16	65094613	65095151
2_wt.q.05_peak_12546	chr13	83609218	83610879
2_wt.q.05_peak_11808	chr13	45049184	45050082
2_wt.q.05_peak_23445	chr19	37059680	37060314
2_wt.q.05_peak_44541	chr9	66597347	66597952
2_wt.q.05_peak_30081	chr3	136766346	136766786
2_wt.q.05_peak_39836	chr7	91412350	91412675
2_wt.q.05_peak_12024	chr13	54798009	54798806
2_wt.q.05_peak_17693	chr16	9625908	9626563
2_wt.q.05_peak_4622	chr10	66853143	66853788
2_wt.q.05_peak_18551	chr16	44226639	44227356
2_wt.q.05_peak_37557	chr6	106268578	106269450
2_wt.q.05_peak_24706	chr2	33440701	33441017
2_wt.q.05_peak_40604	chr7	125999956	126000784
2_wt.q.05_peak_12544	chr13	83602280	83605042
2_wt.q.05_peak_25190	chr2	58941257	58941951
2_wt.q.05_peak_1034	chr1	59987432	59987779
2_wt.q.05_peak_13717	chr14	23758317	23759018
2_wt.q.05_peak_8755	chr11	118626157	118626647
2_wt.q.05_peak_14008	chr14	39034773	39035577
2_wt.q.05_peak_34429	chr5	80199157	80200358
2_wt.q.05_peak_36091	chr6	23707346	23708128
2_wt.q.05_peak_5411	chr10	99519407	99520211
2_wt.q.05_peak_16581	chr15	68754132	68755633
2_wt.q.05_peak_5964	chr10	126956888	126957747
2_wt.q.05_peak_25838	chr2	90504667	90505255
2_wt.q.05_peak_30244	chr3	143613637	143614916
2_wt.q.05_peak_39195	chr7	57296179	57297134
2_wt.q.05_peak_45989	chrX	61652709	61653044
2_wt.q.05_peak_40512	chr7	122356480	122357029
2_wt.q.05_peak_26491	chr2	119388057	119388627
2_wt.q.05_peak_24372	chr2	19762910	19763346
2_wt.q.05_peak_22697	chr18	86420722	86421850
2_wt.q.05_peak_43703	chr9	36906823	36907662
2_wt.q.05_peak_35517	chr5	136362328	136363366
2_wt.q.05_peak_3236	chr1	180140844	180141719
2_wt.q.05_peak_35888	chr6	7852762	7853987
2_wt.q.05_peak_23183	chr19	22973219	22973870
2_wt.q.05_peak_25846	chr2	90567841	90568820
2_wt.q.05_peak_13218	chr13	110002340	110003381
2_wt.q.05_peak_5198	chr10	91612147	91612592
2_wt.q.05_peak_43746	chr9	37575433	37576614
2_wt.q.05_peak_6527	chr11	29777583	29778819
2_wt.q.05_peak_24229	chr2	11346765	11348402
2_wt.q.05_peak_16340	chr15	55694632	55695110
2_wt.q.05_peak_38076	chr6	127661449	127662667
2_wt.q.05_peak_20957	chr17	90574225	90574526
2_wt.q.05_peak_30843	chr4	25691497	25692282
2_wt.q.05_peak_33389	chr5	20578719	20579426
2_wt.q.05_peak_1195	chr1	66807003	66807528
2_wt.q.05_peak_37404	chr6	98287774	98288830
2_wt.q.05_peak_11323	chr13	19150558	19151138
2_wt.q.05_peak_28169	chr3	33440063	33441150
2_wt.q.05_peak_4568	chr10	63000976	63001495
2_wt.q.05_peak_7077	chr11	56471667	56472033
2_wt.q.05_peak_15551	chr15	12245490	12247252
2_wt.q.05_peak_41830	chr8	56508885	56509221
2_wt.q.05_peak_17235	chr15	93845593	93847218
2_wt.q.05_peak_4475	chr10	58402155	58403490
2_wt.q.05_peak_708	chr1	43817982	43819187
2_wt.q.05_peak_11631	chr13	36892347	36893340
2_wt.q.05_peak_13049	chr13	102744622	102746267
2_wt.q.05_peak_1073	chr1	62790450	62790967
2_wt.q.05_peak_17460	chr15	100832199	100833383
2_wt.q.05_peak_45550	chr9	113211915	113213324
2_wt.q.05_peak_44848	chr9	83042678	83043294
2_wt.q.05_peak_38317	chr6	143420090	143420384
2_wt.q.05_peak_31688	chr4	83431925	83432492
2_wt.q.05_peak_31619	chr4	81563534	81566687
2_wt.q.05_peak_26777	chr2	131376647	131377795
2_wt.q.05_peak_26299	chr2	110927806	110929050
2_wt.q.05_peak_12656	chr13	90860856	90861511
2_wt.q.05_peak_27843	chr3	8995923	8996339
2_wt.q.05_peak_11621	chr13	36503774	36507353
2_wt.q.05_peak_1191	chr1	66552051	66552948
2_wt.q.05_peak_39513	chr7	78297340	78298301
2_wt.q.05_peak_36570	chr6	43296941	43297699
2_wt.q.05_peak_36857	chr6	65584694	65585555
2_wt.q.05_peak_32794	chr4	138271509	138272739
2_wt.q.05_peak_42028	chr8	68641660	68643214
2_wt.q.05_peak_31178	chr4	46829086	46829664
2_wt.q.05_peak_37868	chr6	117562943	117564617
2_wt.q.05_peak_2589	chr1	157168549	157170579
2_wt.q.05_peak_16456	chr15	64163362	64164369
2_wt.q.05_peak_9584	chr12	46111190	46111783
2_wt.q.05_peak_41984	chr8	67445687	67446650
2_wt.q.05_peak_33772	chr5	36601608	36602241
2_wt.q.05_peak_14246	chr14	57528878	57529717
2_wt.q.05_peak_35313	chr5	126254701	126255247
2_wt.q.05_peak_15328	chr14	120791899	120792847
2_wt.q.05_peak_258	chr1	22728137	22728733
2_wt.q.05_peak_16311	chr15	54466432	54467572
2_wt.q.05_peak_40333	chr7	113619067	113619958
2_wt.q.05_peak_21074	chr18	6738147	6739432
2_wt.q.05_peak_42214	chr8	76970348	76970727
2_wt.q.05_peak_240	chr1	21941497	21942277
2_wt.q.05_peak_16540	chr15	67221510	67222189
2_wt.q.05_peak_43171	chr8	128724279	128725064
2_wt.q.05_peak_8057	chr11	96621451	96621878
2_wt.q.05_peak_21245	chr18	17205315	17206512
2_wt.q.05_peak_11543	chr13	30384366	30384808
2_wt.q.05_peak_2528	chr1	155027310	155027857
2_wt.q.05_peak_37313	chr6	92609263	92611814
2_wt.q.05_peak_7317	chr11	68531047	68531349
2_wt.q.05_peak_3970	chr10	24989651	24990558
2_wt.q.05_peak_33165	chr5	5254201	5254975
2_wt.q.05_peak_12298	chr13	69713039	69713958
2_wt.q.05_peak_30342	chr3	149258644	149259208
2_wt.q.05_peak_38400	chr6	148097688	148097961
2_wt.q.05_peak_46185	chrX	115928779	115929092
2_wt.q.05_peak_41794	chr8	54876285	54878050
2_wt.q.05_peak_41888	chr8	61217328	61217685
2_wt.q.05_peak_43553	chr9	28281914	28282371
2_wt.q.05_peak_45721	chr9	121555391	121556241
2_wt.q.05_peak_25612	chr2	76124011	76125584
2_wt.q.05_peak_8950	chr12	6848113	6849209
2_wt.q.05_peak_32813	chr4	138551524	138552191
2_wt.q.05_peak_31762	chr4	87126063	87127568
2_wt.q.05_peak_43068	chr8	124389770	124390110
2_wt.q.05_peak_33072	chr4	153652631	153653342
2_wt.q.05_peak_5571	chr10	108743510	108745247
2_wt.q.05_peak_16731	chr15	74594240	74595181
2_wt.q.05_peak_41351	chr8	25798544	25799327
2_wt.q.05_peak_31733	chr4	85728143	85728846
2_wt.q.05_peak_24495	chr2	26411095	26411783
2_wt.q.05_peak_23975	chr2	4616791	4617630
2_wt.q.05_peak_43082	chr8	124532407	124533319
2_wt.q.05_peak_11853	chr13	46084841	46085198
2_wt.q.05_peak_30501	chr3	158355732	158356925
2_wt.q.05_peak_16108	chr15	41611771	41612599
2_wt.q.05_peak_26108	chr2	102256148	102257055
2_wt.q.05_peak_28694	chr3	68614937	68615417
2_wt.q.05_peak_10273	chr12	82664108	82665344
2_wt.q.05_peak_46258	chrX	151087282	151087847
2_wt.q.05_peak_29935	chr3	127322882	127323720
2_wt.q.05_peak_12270	chr13	68905675	68907410
2_wt.q.05_peak_44925	chr9	86794826	86796203
2_wt.q.05_peak_10996	chr12	117661373	117662343
2_wt.q.05_peak_7978	chr11	93127970	93129497
2_wt.q.05_peak_1062	chr1	61042644	61043456
2_wt.q.05_peak_5471	chr10	106408741	106409614
2_wt.q.05_peak_27280	chr2	152129590	152130280
2_wt.q.05_peak_12090	chr13	58068210	58068610
2_wt.q.05_peak_39116	chr7	49569257	49570146
2_wt.q.05_peak_16481	chr15	64562323	64563232
2_wt.q.05_peak_18654	chr16	52020578	52021862
2_wt.q.05_peak_38404	chr6	148255819	148256233
2_wt.q.05_peak_31563	chr4	77655553	77657021
2_wt.q.05_peak_31914	chr4	98076270	98076802
2_wt.q.05_peak_17819	chr16	13874989	13875629
2_wt.q.05_peak_2358	chr1	144916874	144917173
2_wt.q.05_peak_35932	chr6	12177947	12179012
2_wt.q.05_peak_39832	chr7	91382281	91382911
2_wt.q.05_peak_18462	chr16	39224179	39224517
2_wt.q.05_peak_45560	chr9	113394566	113394926
2_wt.q.05_peak_39656	chr7	83016029	83016657
2_wt.q.05_peak_27464	chr2	158643617	158644495
2_wt.q.05_peak_21209	chr18	15076212	15079113
2_wt.q.05_peak_29842	chr3	123498891	123499812
2_wt.q.05_peak_44835	chr9	82854480	82856981
2_wt.q.05_peak_46311	chrX	158851578	158853106
2_wt.q.05_peak_15287	chr14	120112969	120113660
2_wt.q.05_peak_45426	chr9	111158975	111159741
2_wt.q.05_peak_12091	chr13	58073212	58073747
2_wt.q.05_peak_32011	chr4	102887939	102889041
2_wt.q.05_peak_31442	chr4	68905880	68907173
2_wt.q.05_peak_21412	chr18	28714013	28714560
2_wt.q.05_peak_3098	chr1	175296698	175297059
2_wt.q.05_peak_23405	chr19	35537636	35538503
2_wt.q.05_peak_30624	chr4	9657011	9657861
2_wt.q.05_peak_11560	chr13	31926333	31927089
2_wt.q.05_peak_20238	chr17	52251069	52252275
2_wt.q.05_peak_20918	chr17	89409917	89410735
2_wt.q.05_peak_18985	chr16	76914138	76914849
2_wt.q.05_peak_26020	chr2	96401146	96402344
2_wt.q.05_peak_42187	chr8	73920887	73921964
2_wt.q.05_peak_20822	chr17	85949049	85949535
2_wt.q.05_peak_12882	chr13	97492522	97493829
2_wt.q.05_peak_6994	chr11	52648464	52649246
2_wt.q.05_peak_37511	chr6	102597647	102598551
2_wt.q.05_peak_22922	chr19	7531322	7532181
2_wt.q.05_peak_24454	chr2	24684883	24685691
2_wt.q.05_peak_31151	chr4	46081124	46081963
2_wt.q.05_peak_19613	chr17	17591318	17592193
2_wt.q.05_peak_10560	chr12	97515395	97516958
2_wt.q.05_peak_41874	chr8	60773105	60774099
2_wt.q.05_peak_30710	chr4	15032857	15033435
2_wt.q.05_peak_45318	chr9	107775777	107776697
2_wt.q.05_peak_25025	chr2	48624059	48624801
2_wt.q.05_peak_20087	chr17	44631516	44632194
2_wt.q.05_peak_4588	chr10	63946936	63948148
2_wt.q.05_peak_6259	chr11	15027490	15027847
2_wt.q.05_peak_21295	chr18	22875628	22876373
2_wt.q.05_peak_9004	chr12	11348053	11349971
2_wt.q.05_peak_5682	chr10	110477497	110478123
2_wt.q.05_peak_40153	chr7	105562165	105562683
2_wt.q.05_peak_29724	chr3	117841859	117842612
2_wt.q.05_peak_45548	chr9	113195130	113195799
2_wt.q.05_peak_42665	chr8	102753851	102754386
2_wt.q.05_peak_13824	chr14	27975170	27976546
2_wt.q.05_peak_14968	chr14	96553579	96554157
2_wt.q.05_peak_604	chr1	39311879	39312441
2_wt.q.05_peak_25698	chr2	79645892	79646754
2_wt.q.05_peak_41627	chr8	42886320	42886956
2_wt.q.05_peak_16647	chr15	70341224	70342173
2_wt.q.05_peak_31565	chr4	77674433	77674925
2_wt.q.05_peak_30	chr1	5176922	5177786
2_wt.q.05_peak_36143	chr6	27977181	27977840
2_wt.q.05_peak_12189	chr13	63046052	63046708
2_wt.q.05_peak_1977	chr1	128076968	128078722
2_wt.q.05_peak_7062	chr11	55194026	55194409
2_wt.q.05_peak_28070	chr3	27656898	27657378
2_wt.q.05_peak_4068	chr10	29424453	29425770
2_wt.q.05_peak_8395	chr11	104566011	104566690
2_wt.q.05_peak_27533	chr2	163674909	163675894
2_wt.q.05_peak_39119	chr7	49762512	49763243
2_wt.q.05_peak_27874	chr3	12635592	12635982
2_wt.q.05_peak_21047	chr18	4672096	4672991
2_wt.q.05_peak_45752	chr9	122420292	122422010
2_wt.q.05_peak_30243	chr3	143597216	143597957
2_wt.q.05_peak_19371	chr17	4378352	4379425
2_wt.q.05_peak_13220	chr13	110010701	110011337
2_wt.q.05_peak_38330	chr6	144074889	144077247
2_wt.q.05_peak_14939	chr14	93623907	93625223
2_wt.q.05_peak_24387	chr2	20293081	20293848
2_wt.q.05_peak_24214	chr2	8632019	8632487
2_wt.q.05_peak_12361	chr13	75402971	75403665
2_wt.q.05_peak_15511	chr15	11862218	11862636
2_wt.q.05_peak_18288	chr16	34239431	34243126
2_wt.q.05_peak_10368	chr12	85979980	85980459
2_wt.q.05_peak_28769	chr3	73355005	73355332
2_wt.q.05_peak_44027	chr9	48028806	48029527
2_wt.q.05_peak_3776	chr10	14115247	14116383
2_wt.q.05_peak_28304	chr3	42286054	42286571
2_wt.q.05_peak_43160	chr8	128187576	128188217
2_wt.q.05_peak_12771	chr13	93380989	93382043
2_wt.q.05_peak_17244	chr15	94011459	94012245
2_wt.q.05_peak_6667	chr11	36107704	36108341
2_wt.q.05_peak_7882	chr11	87283609	87284353
2_wt.q.05_peak_40028	chr7	99947159	99947977
2_wt.q.05_peak_8634	chr11	113926905	113928577
2_wt.q.05_peak_29273	chr3	95491484	95492193
2_wt.q.05_peak_14075	chr14	47264702	47265952
2_wt.q.05_peak_2691	chr1	159723644	159724373
2_wt.q.05_peak_9236	chr12	28684766	28685533
2_wt.q.05_peak_21012	chr17	94254322	94256245
2_wt.q.05_peak_46333	chrX	160905127	160905445
2_wt.q.05_peak_40374	chr7	117106436	117107334
2_wt.q.05_peak_36050	chr6	18651774	18652383
2_wt.q.05_peak_44938	chr9	87202180	87203081
2_wt.q.05_peak_45508	chr9	112223835	112225424
2_wt.q.05_peak_23797	chr19	53850065	53850817
2_wt.q.05_peak_6838	chr11	45975431	45976442
2_wt.q.05_peak_34102	chr5	62078625	62079693
2_wt.q.05_peak_39923	chr7	95761000	95761863
2_wt.q.05_peak_26039	chr2	97414182	97414962
2_wt.q.05_peak_4416	chr10	53414027	53414739
2_wt.q.05_peak_1075	chr1	62808333	62808878
2_wt.q.05_peak_42652	chr8	102000114	102001457
2_wt.q.05_peak_18067	chr16	25313847	25315207
2_wt.q.05_peak_9246	chr12	28787851	28788172
2_wt.q.05_peak_13833	chr14	28243032	28244186
2_wt.q.05_peak_9819	chr12	63653303	63653869
2_wt.q.05_peak_14052	chr14	45321521	45322221
2_wt.q.05_peak_11505	chr13	26169414	26169835
2_wt.q.05_peak_1308	chr1	75555825	75557062
2_wt.q.05_peak_25380	chr2	67486677	67487279
2_wt.q.05_peak_17458	chr15	100823403	100823959
2_wt.q.05_peak_44562	chr9	66988797	66989589
2_wt.q.05_peak_1039	chr1	60358566	60360282
2_wt.q.05_peak_21945	chr18	50769063	50769687
2_wt.q.05_peak_31254	chr4	52341012	52342325
2_wt.q.05_peak_24992	chr2	45408479	45409643
2_wt.q.05_peak_25686	chr2	79056240	79056899
2_wt.q.05_peak_6520	chr11	29744246	29744655
2_wt.q.05_peak_13537	chr14	15377539	15377911
2_wt.q.05_peak_43707	chr9	36941764	36942273
2_wt.q.05_peak_23798	chr19	53852273	53853118
2_wt.q.05_peak_11751	chr13	43188718	43189361
2_wt.q.05_peak_13689	chr14	21932262	21933361
2_wt.q.05_peak_1449	chr1	83509356	83510195
2_wt.q.05_peak_3690	chr10	10697244	10698323
2_wt.q.05_peak_2465	chr1	152982824	152983874
2_wt.q.05_peak_41041	chr8	10545758	10547361
2_wt.q.05_peak_2848	chr1	166243820	166244849
2_wt.q.05_peak_30702	chr4	14175306	14175958
2_wt.q.05_peak_30705	chr4	14395091	14396448
2_wt.q.05_peak_10674	chr12	100429527	100430164
2_wt.q.05_peak_26939	chr2	136414763	136415879
2_wt.q.05_peak_39882	chr7	92114819	92115852
2_wt.q.05_peak_6665	chr11	36001096	36001410
2_wt.q.05_peak_9576	chr12	45933893	45934250
2_wt.q.05_peak_17641	chr16	7031827	7032509
2_wt.q.05_peak_2281	chr1	140434751	140435352
2_wt.q.05_peak_25992	chr2	93753373	93753800
2_wt.q.05_peak_43441	chr9	25186156	25187144
2_wt.q.05_peak_1549	chr1	87793035	87793744
2_wt.q.05_peak_6404	chr11	24008801	24009639
2_wt.q.05_peak_3505	chr1	193751718	193752929
2_wt.q.05_peak_43412	chr9	24027422	24028367
2_wt.q.05_peak_19019	chr16	77704274	77704941
2_wt.q.05_peak_23213	chr19	23609068	23610046
2_wt.q.05_peak_32816	chr4	138659863	138660333
2_wt.q.05_peak_11026	chr12	119997859	119998833
2_wt.q.05_peak_44782	chr9	78124042	78124503
2_wt.q.05_peak_16247	chr15	51392259	51392948
2_wt.q.05_peak_16025	chr15	38919463	38920581
2_wt.q.05_peak_42281	chr8	82945729	82946395
2_wt.q.05_peak_22220	chr18	64535965	64536376
2_wt.q.05_peak_9586	chr12	46333186	46333861
2_wt.q.05_peak_39830	chr7	91369177	91370514
2_wt.q.05_peak_34894	chr5	111376033	111376693
2_wt.q.05_peak_19359	chr17	3471540	3472474
2_wt.q.05_peak_30773	chr4	19499114	19499655
2_wt.q.05_peak_24421	chr2	21619038	21620358
2_wt.q.05_peak_32012	chr4	102912682	102913068
2_wt.q.05_peak_32819	chr4	138722818	138724839
2_wt.q.05_peak_7480	chr11	74526401	74527845
2_wt.q.05_peak_25397	chr2	68287902	68288679
2_wt.q.05_peak_19271	chr16	94850156	94850802
2_wt.q.05_peak_30960	chr4	33686104	33686587
2_wt.q.05_peak_33266	chr5	14508885	14509165
2_wt.q.05_peak_5429	chr10	100281633	100283222
2_wt.q.05_peak_927	chr1	55558557	55559221
2_wt.q.05_peak_5272	chr10	94777430	94778370
2_wt.q.05_peak_17247	chr15	94160748	94161300
2_wt.q.05_peak_10555	chr12	97310629	97310992
2_wt.q.05_peak_26798	chr2	131775029	131775464
2_wt.q.05_peak_13720	chr14	23786143	23787273
2_wt.q.05_peak_16448	chr15	64012247	64012919
2_wt.q.05_peak_5280	chr10	95144085	95144645
2_wt.q.05_peak_37551	chr6	105981925	105982767
2_wt.q.05_peak_15550	chr15	12243740	12245003
2_wt.q.05_peak_31723	chr4	85338857	85339962
2_wt.q.05_peak_16056	chr15	39819085	39820110
2_wt.q.05_peak_34092	chr5	58082243	58082885
2_wt.q.05_peak_32831	chr4	138899036	138899823
2_wt.q.05_peak_14500	chr14	66306553	66307731
2_wt.q.05_peak_17598	chr16	5214060	5214731
2_wt.q.05_peak_36211	chr6	29883065	29883595
2_wt.q.05_peak_33016	chr4	150817087	150818018
2_wt.q.05_peak_34497	chr5	85918056	85919083
2_wt.q.05_peak_33397	chr5	20628782	20629530
2_wt.q.05_peak_41149	chr8	15206518	15207572
2_wt.q.05_peak_41237	chr8	18268088	18269018
2_wt.q.05_peak_11744	chr13	43036243	43037040
2_wt.q.05_peak_6481	chr11	26981990	26983337
2_wt.q.05_peak_5782	chr10	116107988	116109268
2_wt.q.05_peak_38263	chr6	139503159	139503661
2_wt.q.05_peak_2153	chr1	134909068	134910162
2_wt.q.05_peak_2947	chr1	169900630	169901338
2_wt.q.05_peak_44882	chr9	85410401	85411190
2_wt.q.05_peak_31869	chr4	95588597	95589366
2_wt.q.05_peak_43077	chr8	124462516	124463901
2_wt.q.05_peak_42592	chr8	95687969	95689130
2_wt.q.05_peak_20775	chr17	82554196	82554793
2_wt.q.05_peak_30226	chr3	143173769	143174508
2_wt.q.05_peak_10712	chr12	101893059	101893571
2_wt.q.05_peak_18671	chr16	52513820	52514175
2_wt.q.05_peak_33863	chr5	42271561	42272684
2_wt.q.05_peak_3858	chr10	18663750	18664046
2_wt.q.05_peak_34208	chr5	67643550	67644081
2_wt.q.05_peak_16922	chr15	80138523	80139224
2_wt.q.05_peak_6817	chr11	43967722	43968433
2_wt.q.05_peak_34649	chr5	98776719	98777321
2_wt.q.05_peak_44720	chr9	75219151	75220239
2_wt.q.05_peak_44127	chr9	51924064	51924962
2_wt.q.05_peak_46147	chrX	102416288	102417070
2_wt.q.05_peak_43823	chr9	40765077	40766501
2_wt.q.05_peak_13976	chr14	36524773	36526468
2_wt.q.05_peak_3865	chr10	19001975	19002255
2_wt.q.05_peak_22774	chr19	4481308	4482812
2_wt.q.05_peak_18612	chr16	47627740	47628486
2_wt.q.05_peak_26662	chr2	127034437	127036039
2_wt.q.05_peak_13556	chr14	16741178	16741729
2_wt.q.05_peak_44488	chr9	65404419	65404827
2_wt.q.05_peak_37214	chr6	89553651	89554117
2_wt.q.05_peak_6769	chr11	42497425	42497913
2_wt.q.05_peak_20595	chr17	71398382	71399284
2_wt.q.05_peak_44252	chr9	56712900	56713284
2_wt.q.05_peak_116	chr1	12010348	12010610
2_wt.q.05_peak_11147	chr13	10240119	10240412
2_wt.q.05_peak_17823	chr16	14082809	14083357
2_wt.q.05_peak_10492	chr12	92225854	92226232
2_wt.q.05_peak_18095	chr16	27682889	27684383
2_wt.q.05_peak_1204	chr1	67795425	67795921
2_wt.q.05_peak_39155	chr7	55189559	55190101
2_wt.q.05_peak_21705	chr18	39250358	39251490
2_wt.q.05_peak_31736	chr4	85920857	85921124
2_wt.q.05_peak_231	chr1	21676319	21677653
2_wt.q.05_peak_17303	chr15	95886757	95887847
2_wt.q.05_peak_19175	chr16	90610450	90610956
2_wt.q.05_peak_17035	chr15	84078206	84078921
2_wt.q.05_peak_7877	chr11	87238503	87239571
2_wt.q.05_peak_11645	chr13	37355703	37356360
2_wt.q.05_peak_45118	chr9	100695952	100696668
2_wt.q.05_peak_45198	chr9	104776383	104777224
2_wt.q.05_peak_1879	chr1	121547070	121547671
2_wt.q.05_peak_9579	chr12	46040041	46041203
2_wt.q.05_peak_13516	chr14	13593202	13593851
2_wt.q.05_peak_9667	chr12	51358042	51358830
2_wt.q.05_peak_1543	chr1	87605494	87606535
2_wt.q.05_peak_3351	chr1	185847235	185847666
2_wt.q.05_peak_16374	chr15	58343925	58344567
2_wt.q.05_peak_33222	chr5	9578622	9579594
2_wt.q.05_peak_40603	chr7	125984157	125984547
2_wt.q.05_peak_2802	chr1	164688929	164689917
2_wt.q.05_peak_6781	chr11	42574746	42575812
2_wt.q.05_peak_1160	chr1	66192630	66193785
2_wt.q.05_peak_30772	chr4	19441550	19442128
2_wt.q.05_peak_16905	chr15	79760814	79761534
2_wt.q.05_peak_20362	chr17	63209076	63211163
2_wt.q.05_peak_45577	chr9	113645325	113646346
2_wt.q.05_peak_1109	chr1	64079508	64081361
2_wt.q.05_peak_15414	chr14	124604825	124606683
2_wt.q.05_peak_39425	chr7	72590081	72593469
2_wt.q.05_peak_2125	chr1	133896541	133897450
2_wt.q.05_peak_30574	chr4	6375351	6377054
2_wt.q.05_peak_1527	chr1	86931452	86932030
2_wt.q.05_peak_21128	chr18	10404860	10405532
2_wt.q.05_peak_3617	chr10	7124899	7125481
2_wt.q.05_peak_42943	chr8	119020804	119021604
2_wt.q.05_peak_3802	chr10	15868037	15868657
2_wt.q.05_peak_33984	chr5	51782641	51784056
2_wt.q.05_peak_3996	chr10	26202493	26203165
2_wt.q.05_peak_1222	chr1	71357350	71357959
2_wt.q.05_peak_1392	chr1	80472380	80472764
2_wt.q.05_peak_14418	chr14	64528215	64528902
2_wt.q.05_peak_38389	chr6	146956473	146957644
2_wt.q.05_peak_26880	chr2	134846364	134847313
2_wt.q.05_peak_27978	chr3	20892627	20894216
2_wt.q.05_peak_31124	chr4	44269241	44269730
2_wt.q.05_peak_15569	chr15	12884969	12885800
2_wt.q.05_peak_29212	chr3	90587198	90587787
2_wt.q.05_peak_37287	chr6	92409580	92410283
2_wt.q.05_peak_40093	chr7	101414097	101415302
2_wt.q.05_peak_14870	chr14	86154551	86155202
2_wt.q.05_peak_14494	chr14	66263017	66263470
2_wt.q.05_peak_9585	chr12	46247272	46247744
2_wt.q.05_peak_30201	chr3	141618470	141618759
2_wt.q.05_peak_36351	chr6	33828525	33829187
2_wt.q.05_peak_16560	chr15	68428652	68429383
2_wt.q.05_peak_13676	chr14	21640571	21641868
2_wt.q.05_peak_14477	chr14	65867490	65867829
2_wt.q.05_peak_17256	chr15	94775591	94777110
2_wt.q.05_peak_6870	chr11	47705391	47706475
2_wt.q.05_peak_28724	chr3	69464801	69466566
2_wt.q.05_peak_37664	chr6	109232827	109234047
2_wt.q.05_peak_35065	chr5	118716431	118716747
2_wt.q.05_peak_1148	chr1	65538112	65539051
2_wt.q.05_peak_51	chr1	8921570	8922590
2_wt.q.05_peak_22624	chr18	82493569	82494326
2_wt.q.05_peak_14538	chr14	67085071	67086156
2_wt.q.05_peak_14451	chr14	65086157	65086825
2_wt.q.05_peak_27115	chr2	143678162	143678588
2_wt.q.05_peak_28301	chr3	42218429	42219108
2_wt.q.05_peak_23567	chr19	43957676	43958576
2_wt.q.05_peak_30712	chr4	15092340	15093657
2_wt.q.05_peak_37597	chr6	108072696	108075344
2_wt.q.05_peak_20926	chr17	89864783	89865437
2_wt.q.05_peak_28731	chr3	69559319	69560021
2_wt.q.05_peak_30568	chr4	6096552	6097193
2_wt.q.05_peak_28961	chr3	82369458	82371533
2_wt.q.05_peak_314	chr1	24661392	24662340
2_wt.q.05_peak_30836	chr4	25065646	25066371
2_wt.q.05_peak_20450	chr17	66349813	66350956
2_wt.q.05_peak_27091	chr2	143217660	143218887
2_wt.q.05_peak_15868	chr15	31977488	31978386
2_wt.q.05_peak_20049	chr17	41144595	41145018
2_wt.q.05_peak_45790	chr9	123695671	123696417
2_wt.q.05_peak_8438	chr11	105855047	105856303
2_wt.q.05_peak_5598	chr10	108988620	108989941
2_wt.q.05_peak_15420	chr15	3344623	3345674
2_wt.q.05_peak_45451	chr9	111446078	111446893
2_wt.q.05_peak_34449	chr5	81598867	81599139
2_wt.q.05_peak_14774	chr14	77214562	77215224
2_wt.q.05_peak_11669	chr13	40928416	40929048
2_wt.q.05_peak_41532	chr8	36914457	36915813
2_wt.q.05_peak_1089	chr1	63573590	63575132
2_wt.q.05_peak_26663	chr2	127039529	127040141
2_wt.q.05_peak_41989	chr8	67713660	67715116
2_wt.q.05_peak_1739	chr1	102138757	102139640
2_wt.q.05_peak_316	chr1	24673061	24674236
2_wt.q.05_peak_4482	chr10	58554544	58555182
2_wt.q.05_peak_38102	chr6	131402866	131403319
2_wt.q.05_peak_31133	chr4	45047431	45048028
2_wt.q.05_peak_14625	chr14	71972458	71973788
2_wt.q.05_peak_20995	chr17	92869207	92870142
2_wt.q.05_peak_2293	chr1	140872555	140873429
2_wt.q.05_peak_22178	chr18	62101341	62102551
2_wt.q.05_peak_38425	chr6	149063667	149063985
2_wt.q.05_peak_6401	chr11	23978721	23979145
2_wt.q.05_peak_14756	chr14	76777952	76779274
2_wt.q.05_peak_41825	chr8	56149840	56150790
2_wt.q.05_peak_37985	chr6	122682224	122683380
2_wt.q.05_peak_38173	chr6	135866275	135866791
2_wt.q.05_peak_35758	chr5	148130700	148131859
2_wt.q.05_peak_34541	chr5	90289452	90290758
2_wt.q.05_peak_28708	chr3	68905366	68906335
2_wt.q.05_peak_31321	chr4	57228897	57230683
2_wt.q.05_peak_2294	chr1	141075580	141075862
2_wt.q.05_peak_33487	chr5	23525274	23526340
2_wt.q.05_peak_28209	chr3	36202326	36203351
2_wt.q.05_peak_29059	chr3	85607734	85608500
2_wt.q.05_peak_6774	chr11	42535091	42536159
2_wt.q.05_peak_786	chr1	50948316	50949208
2_wt.q.05_peak_16570	chr15	68517728	68521969
2_wt.q.05_peak_6727	chr11	41655139	41655594
2_wt.q.05_peak_2181	chr1	135946506	135947041
2_wt.q.05_peak_26968	chr2	136790362	136791224
2_wt.q.05_peak_26672	chr2	127498978	127499474
2_wt.q.05_peak_40922	chr7	144251085	144251422
2_wt.q.05_peak_35188	chr5	123326540	123327358
2_wt.q.05_peak_22285	chr18	66216861	66218263
2_wt.q.05_peak_44259	chr9	57031190	57032736
2_wt.q.05_peak_16480	chr15	64557402	64558180
2_wt.q.05_peak_18412	chr16	37704821	37705545
2_wt.q.05_peak_30508	chr3	158400682	158401206
2_wt.q.05_peak_15674	chr15	23378183	23378950
2_wt.q.05_peak_29005	chr3	84971526	84972398
2_wt.q.05_peak_23130	chr19	20540861	20543459
2_wt.q.05_peak_43658	chr9	33168194	33168507
2_wt.q.05_peak_1968	chr1	127993494	127994084
2_wt.q.05_peak_26756	chr2	130737703	130738512
2_wt.q.05_peak_30191	chr3	140088236	140089685
2_wt.q.05_peak_7677	chr11	79460784	79461420
2_wt.q.05_peak_34639	chr5	98245855	98246357
2_wt.q.05_peak_41876	chr8	60867286	60867982
2_wt.q.05_peak_2946	chr1	169899116	169899516
2_wt.q.05_peak_3213	chr1	178486547	178486811
2_wt.q.05_peak_2341	chr1	143939564	143940082
2_wt.q.05_peak_3145	chr1	177031035	177031517
2_wt.q.05_peak_29358	chr3	97733567	97734726
2_wt.q.05_peak_11989	chr13	54257451	54258070
2_wt.q.05_peak_41628	chr8	42958245	42958942
2_wt.q.05_peak_16204	chr15	45350426	45351043
2_wt.q.05_peak_10977	chr12	117229294	117230227
2_wt.q.05_peak_3465	chr1	192497390	192498210
2_wt.q.05_peak_15036	chr14	102934715	102935783
2_wt.q.05_peak_28339	chr3	46334238	46335623
2_wt.q.05_peak_2813	chr1	164848479	164849405
2_wt.q.05_peak_44552	chr9	66878859	66879438
2_wt.q.05_peak_46068	chrX	83220102	83222117
2_wt.q.05_peak_26412	chr2	116181630	116182663
2_wt.q.05_peak_35640	chr5	142899140	142899987
2_wt.q.05_peak_4397	chr10	52823072	52823933
2_wt.q.05_peak_41493	chr8	35756432	35756873
2_wt.q.05_peak_23683	chr19	46998205	46998725
2_wt.q.05_peak_7242	chr11	63175596	63176931
2_wt.q.05_peak_39311	chr7	64751077	64752204
2_wt.q.05_peak_33775	chr5	36669183	36670454
2_wt.q.05_peak_15404	chr14	124263101	124263682
2_wt.q.05_peak_13521	chr14	14032698	14033250
2_wt.q.05_peak_12593	chr13	84664353	84664630
2_wt.q.05_peak_3155	chr1	177140585	177141277
2_wt.q.05_peak_30752	chr4	16852298	16853503
2_wt.q.05_peak_2344	chr1	144127681	144128147
2_wt.q.05_peak_18477	chr16	40768456	40769477
2_wt.q.05_peak_45923	chrX	38817222	38817729
2_wt.q.05_peak_27012	chr2	139649379	139650072
2_wt.q.05_peak_11169	chr13	11763249	11764545
2_wt.q.05_peak_13853	chr14	29669697	29670190
2_wt.q.05_peak_19316	chr16	96629833	96630972
2_wt.q.05_peak_36420	chr6	37096476	37097987
2_wt.q.05_peak_5216	chr10	93075319	93076368
2_wt.q.05_peak_11936	chr13	51425472	51425965
2_wt.q.05_peak_13268	chr13	111178589	111179675
2_wt.q.05_peak_17135	chr15	90030795	90032242
2_wt.q.05_peak_26562	chr2	121200653	121200922
2_wt.q.05_peak_9860	chr12	66620755	66621315
2_wt.q.05_peak_36639	chr6	50205120	50206039
2_wt.q.05_peak_3269	chr1	181328336	181328788
2_wt.q.05_peak_2147	chr1	134638271	134638606
2_wt.q.05_peak_6658	chr11	35902402	35903606
2_wt.q.05_peak_28170	chr3	33540656	33541554
2_wt.q.05_peak_225	chr1	21535270	21535792
2_wt.q.05_peak_2728	chr1	160587932	160589068
2_wt.q.05_peak_5095	chr10	88708588	88709506
2_wt.q.05_peak_42741	chr8	105931039	105931379
2_wt.q.05_peak_12635	chr13	89105539	89106217
2_wt.q.05_peak_16246	chr15	51391599	51391970
2_wt.q.05_peak_31357	chr4	59404030	59404803
2_wt.q.05_peak_16935	chr15	80634066	80634867
2_wt.q.05_peak_2222	chr1	137074610	137075241
2_wt.q.05_peak_20614	chr17	73210615	73211314
2_wt.q.05_peak_45584	chr9	113821738	113822893
2_wt.q.05_peak_14516	chr14	66558032	66559617
2_wt.q.05_peak_13186	chr13	109171531	109171879
2_wt.q.05_peak_12632	chr13	88675398	88676008
2_wt.q.05_peak_17435	chr15	100237326	100238129
2_wt.q.05_peak_26705	chr2	129322062	129322722
2_wt.q.05_peak_33229	chr5	9682281	9684705
2_wt.q.05_peak_39465	chr7	74877036	74877552
2_wt.q.05_peak_8430	chr11	105794960	105795526
2_wt.q.05_peak_22514	chr18	75034541	75035501
2_wt.q.05_peak_28448	chr3	54269057	54269838
2_wt.q.05_peak_46129	chrX	100797885	100798933
2_wt.q.05_peak_43434	chr9	25132542	25133291
2_wt.q.05_peak_42528	chr8	93569295	93570509
2_wt.q.05_peak_1743	chr1	103181151	103181449
2_wt.q.05_peak_30234	chr3	143291282	143292384
2_wt.q.05_peak_38331	chr6	144088472	144088868
2_wt.q.05_peak_28300	chr3	42129060	42130554
2_wt.q.05_peak_44890	chr9	86031022	86031695
2_wt.q.05_peak_14863	chr14	83803423	83804150
2_wt.q.05_peak_2491	chr1	153940444	153941445
2_wt.q.05_peak_37753	chr6	113611488	113613195
2_wt.q.05_peak_4423	chr10	53978571	53979030
2_wt.q.05_peak_37536	chr6	104470513	104471131
2_wt.q.05_peak_22494	chr18	74156935	74157858
2_wt.q.05_peak_27098	chr2	143370338	143371141
2_wt.q.05_peak_4236	chr10	40774199	40775617
2_wt.q.05_peak_6388	chr11	23361585	23362934
2_wt.q.05_peak_32013	chr4	102940567	102940895
2_wt.q.05_peak_31461	chr4	69116247	69116637
2_wt.q.05_peak_15639	chr15	20221851	20224150
2_wt.q.05_peak_21797	chr18	42232894	42233406
2_wt.q.05_peak_42270	chr8	81360055	81361455
2_wt.q.05_peak_16373	chr15	58326845	58327570
2_wt.q.05_peak_30242	chr3	143594242	143595521
2_wt.q.05_peak_32631	chr4	132809191	132810434
2_wt.q.05_peak_30763	chr4	18005664	18007004
2_wt.q.05_peak_43992	chr9	46083901	46084559
2_wt.q.05_peak_5551	chr10	108667690	108669908
2_wt.q.05_peak_33619	chr5	30993202	30994209
2_wt.q.05_peak_46104	chrX	95138231	95139141
2_wt.q.05_peak_18964	chr16	75285709	75286575
2_wt.q.05_peak_25147	chr2	55591013	55591717
2_wt.q.05_peak_22111	chr18	60632432	60633506
2_wt.q.05_peak_25797	chr2	84556736	84557897
2_wt.q.05_peak_33773	chr5	36620386	36621437
2_wt.q.05_peak_33416	chr5	20938364	20938826
2_wt.q.05_peak_18353	chr16	35431492	35432110
2_wt.q.05_peak_12694	chr13	92053221	92054403
2_wt.q.05_peak_10889	chr12	111562582	111562853
2_wt.q.05_peak_11935	chr13	51404841	51405236
2_wt.q.05_peak_21912	chr18	48037534	48037893
2_wt.q.05_peak_24027	chr2	6366632	6367638
2_wt.q.05_peak_20501	chr17	69982044	69982755
2_wt.q.05_peak_21039	chr18	4603894	4604695
2_wt.q.05_peak_34619	chr5	97554234	97555035
2_wt.q.05_peak_30181	chr3	139162422	139162802
2_wt.q.05_peak_15101	chr14	105291958	105292361
2_wt.q.05_peak_7843	chr11	86613691	86614109
2_wt.q.05_peak_7426	chr11	71651884	71652832
2_wt.q.05_peak_30092	chr3	136898132	136899861
2_wt.q.05_peak_25016	chr2	47750919	47751621
2_wt.q.05_peak_4425	chr10	54040287	54040884
2_wt.q.05_peak_16416	chr15	59728395	59729105
2_wt.q.05_peak_16409	chr15	59588067	59588361
2_wt.q.05_peak_45199	chr9	104777598	104777876
2_wt.q.05_peak_36413	chr6	36981464	36982003
2_wt.q.05_peak_17465	chr15	100887540	100888935
2_wt.q.05_peak_2401	chr1	149871174	149872390
2_wt.q.05_peak_23207	chr19	23520822	23521272
2_wt.q.05_peak_18027	chr16	22491608	22492504
2_wt.q.05_peak_30227	chr3	143241072	143241427
2_wt.q.05_peak_41747	chr8	50276323	50276589
2_wt.q.05_peak_36738	chr6	55415936	55416568
2_wt.q.05_peak_19267	chr16	94767482	94767916
2_wt.q.05_peak_36206	chr6	29751321	29752052
2_wt.q.05_peak_34911	chr5	112320614	112321713
2_wt.q.05_peak_41432	chr8	32663356	32663664
2_wt.q.05_peak_28173	chr3	33730180	33731114
2_wt.q.05_peak_11159	chr13	10711291	10711871
2_wt.q.05_peak_3335	chr1	184969289	184969877
2_wt.q.05_peak_43472	chr9	26060790	26061382
2_wt.q.05_peak_9959	chr12	70409037	70410554
2_wt.q.05_peak_31714	chr4	85272183	85273919
2_wt.q.05_peak_5644	chr10	109712946	109713404
2_wt.q.05_peak_44834	chr9	82853842	82854185
2_wt.q.05_peak_21532	chr18	34854777	34855720
2_wt.q.05_peak_37498	chr6	101992533	101993367
2_wt.q.05_peak_15597	chr15	16762951	16764005
2_wt.q.05_peak_20786	chr17	83517503	83518368
2_wt.q.05_peak_32258	chr4	118245751	118246498
2_wt.q.05_peak_16	chr1	3900286	3900959
2_wt.q.05_peak_44991	chr9	94302095	94303086
2_wt.q.05_peak_22964	chr19	9066187	9066859
2_wt.q.05_peak_27038	chr2	140774539	140775348
2_wt.q.05_peak_20741	chr17	80939395	80940786
2_wt.q.05_peak_26065	chr2	98286755	98287487
2_wt.q.05_peak_44101	chr9	50966642	50967467
2_wt.q.05_peak_32196	chr4	114635875	114637048
2_wt.q.05_peak_37669	chr6	109814897	109815371
2_wt.q.05_peak_1672	chr1	97554682	97555800
2_wt.q.05_peak_4282	chr10	41883827	41884492
2_wt.q.05_peak_32997	chr4	150495566	150496323
2_wt.q.05_peak_12216	chr13	64211959	64212680
2_wt.q.05_peak_3507	chr1	193930706	193931782
2_wt.q.05_peak_410	chr1	30633047	30633443
2_wt.q.05_peak_24391	chr2	20402941	20403837
2_wt.q.05_peak_18480	chr16	40972159	40972917
2_wt.q.05_peak_21923	chr18	49379945	49380746
2_wt.q.05_peak_22576	chr18	78441622	78442844
2_wt.q.05_peak_26465	chr2	117412071	117412726
2_wt.q.05_peak_35872	chr6	5991509	5992261
2_wt.q.05_peak_28410	chr3	52342530	52342988
2_wt.q.05_peak_23579	chr19	44229845	44230731
2_wt.q.05_peak_40439	chr7	120315480	120316994
2_wt.q.05_peak_22700	chr18	86432023	86433223
2_wt.q.05_peak_25176	chr2	58408639	58409438
2_wt.q.05_peak_33404	chr5	20671279	20671976
2_wt.q.05_peak_15654	chr15	21179437	21180343
2_wt.q.05_peak_15371	chr14	121617568	121618509
2_wt.q.05_peak_33923	chr5	45230095	45230630
2_wt.q.05_peak_31703	chr4	85050825	85051287
2_wt.q.05_peak_7014	chr11	53502495	53502925
2_wt.q.05_peak_44675	chr9	72834929	72836185
2_wt.q.05_peak_22598	chr18	79554261	79555075
2_wt.q.05_peak_9016	chr12	11802173	11802445
2_wt.q.05_peak_35362	chr5	129113396	129114332
2_wt.q.05_peak_23747	chr19	50419193	50419731
2_wt.q.05_peak_18768	chr16	62288762	62289078
2_wt.q.05_peak_7280	chr11	67060972	67061861
2_wt.q.05_peak_36126	chr6	25259995	25260546
2_wt.q.05_peak_39267	chr7	63637491	63637891
2_wt.q.05_peak_22185	chr18	62206154	62207006
2_wt.q.05_peak_16191	chr15	45016446	45019007
2_wt.q.05_peak_9556	chr12	44524528	44524895
2_wt.q.05_peak_13328	chr13	114101007	114102197
2_wt.q.05_peak_4361	chr10	47857386	47858581
2_wt.q.05_peak_2376	chr1	146719415	146719996
2_wt.q.05_peak_5149	chr10	90672369	90672890
2_wt.q.05_peak_19500	chr17	11155847	11158442
2_wt.q.05_peak_24355	chr2	18952649	18954336
2_wt.q.05_peak_26431	chr2	116963395	116964303
2_wt.q.05_peak_2285	chr1	140482709	140483208
2_wt.q.05_peak_6433	chr11	24826125	24826816
2_wt.q.05_peak_27547	chr2	164137444	164137792
2_wt.q.05_peak_33176	chr5	6344367	6345161
2_wt.q.05_peak_34184	chr5	66302827	66303710
2_wt.q.05_peak_11606	chr13	36084385	36085484
2_wt.q.05_peak_31329	chr4	57633344	57633748
2_wt.q.05_peak_28751	chr3	70959212	70959876
2_wt.q.05_peak_16842	chr15	78050231	78051229
2_wt.q.05_peak_30231	chr3	143283216	143284539
2_wt.q.05_peak_41270	chr8	22797402	22797982
2_wt.q.05_peak_24242	chr2	12103114	12103664
2_wt.q.05_peak_13017	chr13	101236955	101237462
2_wt.q.05_peak_45906	chrX	36749055	36749428
2_wt.q.05_peak_10306	chr12	83800581	83801378
2_wt.q.05_peak_38391	chr6	146959829	146960916
2_wt.q.05_peak_8550	chr11	108995541	108996418
2_wt.q.05_peak_29483	chr3	104295141	104296064
2_wt.q.05_peak_23833	chr19	56422723	56423925
2_wt.q.05_peak_45439	chr9	111381121	111381629
2_wt.q.05_peak_37662	chr6	108928405	108929700
2_wt.q.05_peak_27838	chr3	8851074	8851522
2_wt.q.05_peak_16799	chr15	77091561	77092110
2_wt.q.05_peak_22068	chr18	59207476	59209065
2_wt.q.05_peak_42219	chr8	77255967	77257206
2_wt.q.05_peak_16265	chr15	52565253	52566121
2_wt.q.05_peak_11261	chr13	16348425	16349423
2_wt.q.05_peak_36395	chr6	36608284	36609142
2_wt.q.05_peak_30550	chr4	5327114	5327991
2_wt.q.05_peak_16569	chr15	68495827	68496928
2_wt.q.05_peak_36309	chr6	32359549	32360114
2_wt.q.05_peak_24231	chr2	11423564	11424598
2_wt.q.05_peak_14125	chr14	49589942	49591003
2_wt.q.05_peak_253	chr1	22654613	22656698
2_wt.q.05_peak_29907	chr3	127055283	127056068
2_wt.q.05_peak_3807	chr10	16171525	16171848
2_wt.q.05_peak_6120	chr11	5035249	5035514
2_wt.q.05_peak_33263	chr5	14320394	14320750
2_wt.q.05_peak_34266	chr5	71647849	71648647
2_wt.q.05_peak_40109	chr7	101726802	101727185
2_wt.q.05_peak_32181	chr4	111402514	111403664
2_wt.q.05_peak_35114	chr5	121586262	121586777
2_wt.q.05_peak_2943	chr1	169883164	169883521
2_wt.q.05_peak_30077	chr3	136714344	136715182
2_wt.q.05_peak_34849	chr5	108581584	108582027
2_wt.q.05_peak_10716	chr12	101947874	101948553
2_wt.q.05_peak_19450	chr17	8478769	8479204
2_wt.q.05_peak_21406	chr18	27296552	27297440
2_wt.q.05_peak_7455	chr11	72712217	72713172
2_wt.q.05_peak_24182	chr2	7953650	7955582
2_wt.q.05_peak_44731	chr9	75323621	75324064
2_wt.q.05_peak_15191	chr14	112685208	112686852
2_wt.q.05_peak_39740	chr7	89192925	89193641
2_wt.q.05_peak_22616	chr18	80857548	80859039
2_wt.q.05_peak_26278	chr2	110037869	110038823
2_wt.q.05_peak_759	chr1	47192435	47193826
2_wt.q.05_peak_5623	chr10	109500368	109500841
2_wt.q.05_peak_1018	chr1	58985074	58985583
2_wt.q.05_peak_16611	chr15	68995002	68995642
2_wt.q.05_peak_25438	chr2	69175108	69175611
2_wt.q.05_peak_45870	chrX	18520164	18521942
2_wt.q.05_peak_37634	chr6	108434392	108437174
2_wt.q.05_peak_12527	chr13	83539539	83541231
2_wt.q.05_peak_10445	chr12	89358654	89359214
2_wt.q.05_peak_22968	chr19	9963524	9964565
2_wt.q.05_peak_21995	chr18	54221857	54222453
2_wt.q.05_peak_17984	chr16	21457577	21458136
2_wt.q.05_peak_20742	chr17	80941466	80942505
2_wt.q.05_peak_15057	chr14	103162384	103163743
2_wt.q.05_peak_9341	chr12	31729557	31731051
2_wt.q.05_peak_25045	chr2	49472713	49473307
2_wt.q.05_peak_33369	chr5	20302656	20304141
2_wt.q.05_peak_3170	chr1	177347004	177347966
2_wt.q.05_peak_45681	chr9	120403528	120404384
2_wt.q.05_peak_1729	chr1	99871233	99872003
2_wt.q.05_peak_26857	chr2	132860405	132861572
2_wt.q.05_peak_11134	chr13	9951258	9951820
2_wt.q.05_peak_35876	chr6	6487921	6488853
2_wt.q.05_peak_22196	chr18	62853937	62854723
2_wt.q.05_peak_4029	chr10	28067910	28068917
2_wt.q.05_peak_36313	chr6	32471470	32472395
2_wt.q.05_peak_28785	chr3	75670755	75671014
2_wt.q.05_peak_10102	chr12	75573008	75573615
2_wt.q.05_peak_2699	chr1	159872323	159873566
2_wt.q.05_peak_26499	chr2	119600870	119601825
2_wt.q.05_peak_30601	chr4	7597670	7598521
2_wt.q.05_peak_16151	chr15	43587338	43588589
2_wt.q.05_peak_6358	chr11	22124908	22125402
2_wt.q.05_peak_1526	chr1	86925489	86926189
2_wt.q.05_peak_36882	chr6	70116277	70117444
2_wt.q.05_peak_2360	chr1	145015332	145016190
2_wt.q.05_peak_45391	chr9	109022632	109023416
2_wt.q.05_peak_11098	chr13	8056312	8056651
2_wt.q.05_peak_35913	chr6	8900019	8900834
2_wt.q.05_peak_25059	chr2	50013213	50013966
2_wt.q.05_peak_44053	chr9	48800876	48801842
2_wt.q.05_peak_17276	chr15	95280240	95281568
2_wt.q.05_peak_16638	chr15	69695562	69696370
2_wt.q.05_peak_13423	chr14	8760334	8761112
2_wt.q.05_peak_26964	chr2	136781199	136782472
2_wt.q.05_peak_13732	chr14	23966243	23966884
2_wt.q.05_peak_34281	chr5	71916743	71917875
2_wt.q.05_peak_23229	chr19	24510551	24510845
2_wt.q.05_peak_6541	chr11	30150176	30151925
2_wt.q.05_peak_5077	chr10	86992424	86992914
2_wt.q.05_peak_29893	chr3	126920654	126920925
2_wt.q.05_peak_6744	chr11	42050809	42052267
2_wt.q.05_peak_28514	chr3	55740477	55741115
2_wt.q.05_peak_3545	chr1	195005180	195006322
2_wt.q.05_peak_28188	chr3	34231669	34231995
2_wt.q.05_peak_33426	chr5	21434100	21434555
2_wt.q.05_peak_13817	chr14	27861963	27862843
2_wt.q.05_peak_45221	chr9	105475969	105476792
2_wt.q.05_peak_22377	chr18	69118087	69118709
2_wt.q.05_peak_2362	chr1	145226555	145228451
2_wt.q.05_peak_7984	chr11	93489929	93490718
2_wt.q.05_peak_44990	chr9	94300819	94301816
2_wt.q.05_peak_11177	chr13	12013658	12015089
2_wt.q.05_peak_40219	chr7	110989081	110989712
2_wt.q.05_peak_16114	chr15	41677512	41678040
2_wt.q.05_peak_15082	chr14	103689577	103690691
2_wt.q.05_peak_3489	chr1	193350212	193350945
2_wt.q.05_peak_35404	chr5	130672320	130673195
2_wt.q.05_peak_36417	chr6	37037203	37037804
2_wt.q.05_peak_20855	chr17	86437625	86438649
2_wt.q.05_peak_18088	chr16	26775821	26776717
2_wt.q.05_peak_38209	chr6	136241301	136242254
2_wt.q.05_peak_26634	chr2	125480975	125481618
2_wt.q.05_peak_37358	chr6	94584167	94584870
2_wt.q.05_peak_23062	chr19	16007126	16007725
2_wt.q.05_peak_40270	chr7	112203977	112205000
2_wt.q.05_peak_28419	chr3	52705856	52706760
2_wt.q.05_peak_28431	chr3	53164721	53165178
2_wt.q.05_peak_15572	chr15	13030524	13031516
2_wt.q.05_peak_1804	chr1	107582665	107583453
2_wt.q.05_peak_37192	chr6	88711595	88712614
2_wt.q.05_peak_40074	chr7	100814602	100815007
2_wt.q.05_peak_36581	chr6	45039099	45039541
2_wt.q.05_peak_41763	chr8	54228712	54229601
2_wt.q.05_peak_5316	chr10	97939657	97941386
2_wt.q.05_peak_1673	chr1	97600080	97601140
2_wt.q.05_peak_22274	chr18	65694714	65695873
2_wt.q.05_peak_43184	chr9	4060627	4061779
2_wt.q.05_peak_12268	chr13	68889306	68890845
2_wt.q.05_peak_34523	chr5	89014504	89015990
2_wt.q.05_peak_32468	chr4	127517820	127518499
2_wt.q.05_peak_20417	chr17	65299750	65300047
2_wt.q.05_peak_36450	chr6	38198338	38198786
2_wt.q.05_peak_32041	chr4	104307538	104308278
2_wt.q.05_peak_21188	chr18	12913595	12914340
2_wt.q.05_peak_23709	chr19	47542936	47543382
2_wt.q.05_peak_2356	chr1	144883327	144883751
2_wt.q.05_peak_9840	chr12	65201581	65202254
2_wt.q.05_peak_44052	chr9	48795426	48795911
2_wt.q.05_peak_3739	chr10	13600670	13601463
2_wt.q.05_peak_41945	chr8	65420695	65421325
2_wt.q.05_peak_37965	chr6	120960373	120960737
2_wt.q.05_peak_7846	chr11	86664305	86665802
2_wt.q.05_peak_17603	chr16	5920571	5920940
2_wt.q.05_peak_36303	chr6	31574726	31575557
2_wt.q.05_peak_37045	chr6	83371589	83372178
2_wt.q.05_peak_16126	chr15	42375916	42377229
2_wt.q.05_peak_5340	chr10	98774775	98775897
2_wt.q.05_peak_43227	chr9	8927349	8928210
2_wt.q.05_peak_26184	chr2	104266459	104267497
2_wt.q.05_peak_39878	chr7	91955880	91956309
2_wt.q.05_peak_31598	chr4	80629793	80630300
2_wt.q.05_peak_25750	chr2	80910875	80911254
2_wt.q.05_peak_45725	chr9	121663810	121664245
2_wt.q.05_peak_5184	chr10	90964842	90966920
2_wt.q.05_peak_30438	chr3	155360352	155360899
2_wt.q.05_peak_32406	chr4	125191024	125192206
2_wt.q.05_peak_9174	chr12	24870456	24871699
2_wt.q.05_peak_44651	chr9	72196859	72197708
2_wt.q.05_peak_43585	chr9	29244845	29245576
2_wt.q.05_peak_15986	chr15	37680595	37682173
2_wt.q.05_peak_19312	chr16	96535508	96536002
2_wt.q.05_peak_9652	chr12	51058482	51059671
2_wt.q.05_peak_3663	chr10	9814182	9814445
2_wt.q.05_peak_33285	chr5	15914646	15915646
2_wt.q.05_peak_39598	chr7	80806111	80806571
2_wt.q.05_peak_26330	chr2	112474641	112475770
2_wt.q.05_peak_39752	chr7	89540986	89541597
2_wt.q.05_peak_34522	chr5	88964336	88964970
2_wt.q.05_peak_1125	chr1	64570094	64570902
2_wt.q.05_peak_18075	chr16	25856118	25856581
2_wt.q.05_peak_32498	chr4	128340256	128341355
2_wt.q.05_peak_26464	chr2	117389522	117390938
2_wt.q.05_peak_30622	chr4	9555937	9556583
2_wt.q.05_peak_1468	chr1	84386578	84386859
2_wt.q.05_peak_14629	chr14	72238049	72238585
2_wt.q.05_peak_41865	chr8	59475810	59476403
2_wt.q.05_peak_25591	chr2	74378363	74379014
2_wt.q.05_peak_17659	chr16	7282359	7283120
2_wt.q.05_peak_40958	chr8	4312636	4314377
2_wt.q.05_peak_6479	chr11	26966461	26968822
2_wt.q.05_peak_6770	chr11	42522210	42522656
2_wt.q.05_peak_19319	chr16	96740104	96740911
2_wt.q.05_peak_20055	chr17	42365391	42365963
2_wt.q.05_peak_20721	chr17	80621022	80621871
2_wt.q.05_peak_24999	chr2	45622408	45623970
2_wt.q.05_peak_35566	chr5	139111717	139112633
2_wt.q.05_peak_9374	chr12	32961169	32961652
2_wt.q.05_peak_28699	chr3	68676589	68677748
2_wt.q.05_peak_13033	chr13	101719084	101719522
2_wt.q.05_peak_30056	chr3	135970011	135973263
2_wt.q.05_peak_4574	chr10	63156560	63157671
2_wt.q.05_peak_33966	chr5	49497258	49498740
2_wt.q.05_peak_3956	chr10	23090555	23091052
2_wt.q.05_peak_40327	chr7	113394644	113395226
2_wt.q.05_peak_11174	chr13	11914372	11915167
2_wt.q.05_peak_2888	chr1	168008539	168008938
2_wt.q.05_peak_34731	chr5	103093411	103094867
2_wt.q.05_peak_1814	chr1	108389532	108390829
2_wt.q.05_peak_21764	chr18	40458394	40459660
2_wt.q.05_peak_28398	chr3	51941898	51942348
2_wt.q.05_peak_30499	chr3	158340477	158341624
2_wt.q.05_peak_8593	chr11	111100401	111101093
2_wt.q.05_peak_13084	chr13	103993063	103994513
2_wt.q.05_peak_1181	chr1	66418265	66419139
2_wt.q.05_peak_25967	chr2	92672384	92673149
2_wt.q.05_peak_27877	chr3	13247604	13247928
2_wt.q.05_peak_45697	chr9	120869495	120870053
2_wt.q.05_peak_28857	chr3	79996398	79997286
2_wt.q.05_peak_38212	chr6	136353509	136354117
2_wt.q.05_peak_15889	chr15	34265123	34265984
2_wt.q.05_peak_12721	chr13	92973515	92974692
2_wt.q.05_peak_4179	chr10	38572871	38573746
2_wt.q.05_peak_14003	chr14	38870449	38871280
2_wt.q.05_peak_20502	chr17	70004561	70005083
2_wt.q.05_peak_18510	chr16	42325295	42326451
2_wt.q.05_peak_20860	chr17	87038150	87038582
2_wt.q.05_peak_40737	chr7	131951385	131951865
2_wt.q.05_peak_38041	chr6	125225660	125225975
2_wt.q.05_peak_36224	chr6	30432602	30433525
2_wt.q.05_peak_31609	chr4	80917692	80919424
2_wt.q.05_peak_28590	chr3	61358501	61359227
2_wt.q.05_peak_25145	chr2	55534953	55535940
2_wt.q.05_peak_28863	chr3	80159462	80161125
2_wt.q.05_peak_26792	chr2	131695822	131696145
2_wt.q.05_peak_29938	chr3	127394951	127396329
2_wt.q.05_peak_2228	chr1	137584303	137584609
2_wt.q.05_peak_2123	chr1	133842129	133843208
2_wt.q.05_peak_15211	chr14	116096040	116096598
2_wt.q.05_peak_38174	chr6	135892111	135892879
2_wt.q.05_peak_2963	chr1	170297831	170298927
2_wt.q.05_peak_13068	chr13	103284452	103285560
2_wt.q.05_peak_5212	chr10	93053642	93053956
2_wt.q.05_peak_16272	chr15	52866960	52867582
2_wt.q.05_peak_29372	chr3	97849780	97850625
2_wt.q.05_peak_32824	chr4	138801023	138801773
2_wt.q.05_peak_13074	chr13	103369063	103369776
2_wt.q.05_peak_33274	chr5	14662226	14662990
2_wt.q.05_peak_16128	chr15	42495616	42495989
2_wt.q.05_peak_42642	chr8	101097618	101097981
2_wt.q.05_peak_18183	chr16	31598662	31599721
2_wt.q.05_peak_15112	chr14	105562638	105563612
2_wt.q.05_peak_38435	chr6	149495901	149496303
2_wt.q.05_peak_41721	chr8	47679964	47680763
2_wt.q.05_peak_19293	chr16	95777963	95778982
2_wt.q.05_peak_438	chr1	32625901	32626526
2_wt.q.05_peak_35683	chr5	144107248	144107812
2_wt.q.05_peak_13823	chr14	27901355	27901884
2_wt.q.05_peak_28042	chr3	26039450	26041001
2_wt.q.05_peak_43550	chr9	28218381	28218723
2_wt.q.05_peak_24639	chr2	32316155	32316630
2_wt.q.05_peak_34464	chr5	82727944	82730324
2_wt.q.05_peak_3638	chr10	8269592	8270170
2_wt.q.05_peak_34525	chr5	89088301	89088984
2_wt.q.05_peak_23952	chr2	3172201	3173339
2_wt.q.05_peak_9971	chr12	70799380	70799893
2_wt.q.05_peak_37529	chr6	103926756	103927764
2_wt.q.05_peak_46088	chrX	88226335	88227063
2_wt.q.05_peak_37719	chr6	113029334	113029814
2_wt.q.05_peak_41530	chr8	36879722	36880527
2_wt.q.05_peak_39875	chr7	91934740	91936065
2_wt.q.05_peak_31078	chr4	42886476	42887837
2_wt.q.05_peak_35237	chr5	124233137	124233707
2_wt.q.05_peak_4731	chr10	70395738	70396559
2_wt.q.05_peak_15489	chr15	10410601	10411428
2_wt.q.05_peak_28718	chr3	69341995	69342858
2_wt.q.05_peak_16528	chr15	66770951	66772738
2_wt.q.05_peak_42662	chr8	102645394	102646086
2_wt.q.05_peak_2315	chr1	142653136	142653882
2_wt.q.05_peak_45614	chr9	115023510	115024200
2_wt.q.05_peak_3468	chr1	192587188	192588210
2_wt.q.05_peak_10245	chr12	82265664	82266538
2_wt.q.05_peak_13271	chr13	111264306	111264731
2_wt.q.05_peak_14495	chr14	66264190	66264787
2_wt.q.05_peak_24376	chr2	19944864	19946008
2_wt.q.05_peak_769	chr1	47864145	47864417
2_wt.q.05_peak_10974	chr12	117213943	117215221
2_wt.q.05_peak_15539	chr15	12153401	12154825
2_wt.q.05_peak_15942	chr15	36739431	36740509
2_wt.q.05_peak_3713	chr10	11841081	11841667
2_wt.q.05_peak_3675	chr10	10093415	10094923
2_wt.q.05_peak_10646	chr12	100265673	100267071
2_wt.q.05_peak_42869	chr8	111626151	111626739
2_wt.q.05_peak_25900	chr2	91229799	91230346
2_wt.q.05_peak_35370	chr5	129520710	129521764
2_wt.q.05_peak_1408	chr1	81098797	81099073
2_wt.q.05_peak_38184	chr6	135961813	135962559
2_wt.q.05_peak_4018	chr10	27476856	27477322
2_wt.q.05_peak_33971	chr5	49554379	49555280
2_wt.q.05_peak_25783	chr2	84022627	84023891
2_wt.q.05_peak_21327	chr18	23851496	23851789
2_wt.q.05_peak_16492	chr15	65531835	65532706
2_wt.q.05_peak_10993	chr12	117583947	117584955
2_wt.q.05_peak_13712	chr14	23619828	23621574
2_wt.q.05_peak_41608	chr8	41562165	41562965
2_wt.q.05_peak_3801	chr10	15807247	15807838
2_wt.q.05_peak_5548	chr10	108659191	108660008
2_wt.q.05_peak_33186	chr5	7284159	7284803
2_wt.q.05_peak_30566	chr4	6037412	6037778
2_wt.q.05_peak_30491	chr3	158278394	158279046
2_wt.q.05_peak_2378	chr1	146792716	146793426
2_wt.q.05_peak_29656	chr3	115063391	115063861
2_wt.q.05_peak_21225	chr18	16257873	16258462
2_wt.q.05_peak_19417	chr17	5545000	5545785
2_wt.q.05_peak_6713	chr11	40865662	40866542
2_wt.q.05_peak_5721	chr10	111394188	111394836
2_wt.q.05_peak_25574	chr2	73692219	73693632
2_wt.q.05_peak_33203	chr5	8311158	8312867
2_wt.q.05_peak_20206	chr17	50309298	50310263
2_wt.q.05_peak_24121	chr2	7123162	7123835
2_wt.q.05_peak_22077	chr18	59330072	59330891
2_wt.q.05_peak_29017	chr3	85030081	85030561
2_wt.q.05_peak_2379	chr1	147412058	147412514
2_wt.q.05_peak_16085	chr15	40958361	40958710
2_wt.q.05_peak_13114	chr13	105037369	105038969
2_wt.q.05_peak_43300	chr9	16113276	16114646
2_wt.q.05_peak_44711	chr9	75160298	75161302
2_wt.q.05_peak_26082	chr2	101440958	101441589
2_wt.q.05_peak_5544	chr10	108635678	108636409
2_wt.q.05_peak_43644	chr9	32163050	32164852
2_wt.q.05_peak_36099	chr6	23966707	23967614
2_wt.q.05_peak_28658	chr3	67908480	67909545
2_wt.q.05_peak_29557	chr3	107686063	107686978
2_wt.q.05_peak_14381	chr14	64213908	64214781
2_wt.q.05_peak_25406	chr2	68411995	68413100
2_wt.q.05_peak_22552	chr18	77308404	77309627
2_wt.q.05_peak_9516	chr12	41621079	41621870
2_wt.q.05_peak_4674	chr10	68512664	68513212
2_wt.q.05_peak_15411	chr14	124474342	124474774
2_wt.q.05_peak_25947	chr2	92265832	92266797
[truncated: 8,444 more rows]

## Sheet: MYT1L_PFC_E14_Active_Enhancer
PeakID	Chr	Start	End
2_wt.q.05_peak_42205	chr8	75137457	75138014
2_wt.q.05_peak_20853	chr17	86420312	86421221
2_wt.q.05_peak_42052	chr8	69158047	69158859
2_wt.q.05_peak_41909	chr8	64344884	64345456
2_wt.q.05_peak_12910	chr13	97909781	97911757
2_wt.q.05_peak_14333	chr14	62637441	62638216
2_wt.q.05_peak_15123	chr14	105720689	105721979
2_wt.q.05_peak_5947	chr10	125742923	125743473
2_wt.q.05_peak_9619	chr12	49963897	49964545
2_wt.q.05_peak_27406	chr2	156672433	156673896
2_wt.q.05_peak_39453	chr7	73586623	73588214
2_wt.q.05_peak_24181	chr2	7944462	7945520
2_wt.q.05_peak_34414	chr5	77838292	77839047
2_wt.q.05_peak_12604	chr13	84805730	84806124
2_wt.q.05_peak_36349	chr6	33805858	33806246
2_wt.q.05_peak_35219	chr5	124018381	124020065
2_wt.q.05_peak_19322	chr16	96842730	96844101
2_wt.q.05_peak_43561	chr9	28446076	28447987
2_wt.q.05_peak_21189	chr18	12916954	12918227
2_wt.q.05_peak_14675	chr14	74113142	74114029
2_wt.q.05_peak_13040	chr13	101914631	101915970
2_wt.q.05_peak_7745	chr11	81511711	81512267
2_wt.q.05_peak_22089	chr18	59866027	59867930
2_wt.q.05_peak_14392	chr14	64300110	64300439
2_wt.q.05_peak_25980	chr2	92933206	92935351
2_wt.q.05_peak_37017	chr6	80865777	80866399
2_wt.q.05_peak_9765	chr12	58544816	58545357
2_wt.q.05_peak_28486	chr3	55398241	55399113
2_wt.q.05_peak_17182	chr15	91463350	91464432
2_wt.q.05_peak_39368	chr7	67243546	67244815
2_wt.q.05_peak_38252	chr6	138801334	138802568
2_wt.q.05_peak_36402	chr6	36782948	36783763
2_wt.q.05_peak_34017	chr5	53154624	53155295
2_wt.q.05_peak_28355	chr3	49642135	49642427
2_wt.q.05_peak_11722	chr13	42757115	42758574
2_wt.q.05_peak_46349	chrX	162554109	162555011
2_wt.q.05_peak_21376	chr18	25693833	25694918
2_wt.q.05_peak_28797	chr3	76680055	76681095
2_wt.q.05_peak_33899	chr5	44413799	44414534
2_wt.q.05_peak_8930	chr12	5355112	5355790
2_wt.q.05_peak_16019	chr15	38709161	38710244
2_wt.q.05_peak_31627	chr4	82092565	82093006
2_wt.q.05_peak_19572	chr17	14206406	14207488
2_wt.q.05_peak_21404	chr18	26955338	26955859
2_wt.q.05_peak_9443	chr12	36102937	36103751
2_wt.q.05_peak_28413	chr3	52573478	52574382
2_wt.q.05_peak_2448	chr1	152525347	152525901
2_wt.q.05_peak_2092	chr1	132915679	132916208
2_wt.q.05_peak_34629	chr5	97906703	97907336
2_wt.q.05_peak_11791	chr13	44282501	44283885
2_wt.q.05_peak_28627	chr3	65124871	65125547
2_wt.q.05_peak_20360	chr17	63146337	63146915
2_wt.q.05_peak_38112	chr6	134218343	134220689
2_wt.q.05_peak_44266	chr9	57433570	57433858
2_wt.q.05_peak_10371	chr12	86000339	86001943
2_wt.q.05_peak_46073	chrX	85084192	85084871
2_wt.q.05_peak_26143	chr2	102732505	102733332
2_wt.q.05_peak_4996	chr10	82661270	82663318
2_wt.q.05_peak_14396	chr14	64343785	64344498
2_wt.q.05_peak_18537	chr16	43932431	43933531
2_wt.q.05_peak_38156	chr6	135527553	135528597
2_wt.q.05_peak_14393	chr14	64300744	64301817
2_wt.q.05_peak_4686	chr10	69465288	69465644
2_wt.q.05_peak_21689	chr18	38937784	38938535
2_wt.q.05_peak_41399	chr8	28879963	28881090
2_wt.q.05_peak_11347	chr13	20452611	20453615
2_wt.q.05_peak_27307	chr2	153498344	153499286
2_wt.q.05_peak_31222	chr4	48661001	48661573
2_wt.q.05_peak_23906	chr19	58064101	58064834
2_wt.q.05_peak_42931	chr8	117422242	117423446
2_wt.q.05_peak_9767	chr12	58654596	58655351
2_wt.q.05_peak_30116	chr3	137481039	137482239
2_wt.q.05_peak_5132	chr10	90493258	90493680
2_wt.q.05_peak_7603	chr11	77902131	77902428
2_wt.q.05_peak_24013	chr2	5613783	5615412
2_wt.q.05_peak_1754	chr1	105067613	105068512
2_wt.q.05_peak_34216	chr5	67818928	67820270
2_wt.q.05_peak_10585	chr12	98535045	98536290
2_wt.q.05_peak_22259	chr18	65186923	65188945
2_wt.q.05_peak_24117	chr2	7089207	7089962
2_wt.q.05_peak_26103	chr2	102134613	102135425
2_wt.q.05_peak_46152	chrX	103556272	103556564
2_wt.q.05_peak_40382	chr7	117357181	117358310
2_wt.q.05_peak_2531	chr1	155050524	155052488
2_wt.q.05_peak_32296	chr4	120044699	120045923
2_wt.q.05_peak_38412	chr6	148553646	148554961
2_wt.q.05_peak_6597	chr11	32012232	32012665
2_wt.q.05_peak_2031	chr1	131293114	131294275
2_wt.q.05_peak_24931	chr2	44511874	44513380
2_wt.q.05_peak_18458	chr16	38946358	38946984
2_wt.q.05_peak_29432	chr3	101343928	101344745
2_wt.q.05_peak_304	chr1	24228997	24229908
2_wt.q.05_peak_40796	chr7	134189925	134190382
2_wt.q.05_peak_370	chr1	26282584	26283713
2_wt.q.05_peak_35373	chr5	129580270	129581124
2_wt.q.05_peak_22346	chr18	68052554	68053215
2_wt.q.05_peak_22506	chr18	74910879	74911585
2_wt.q.05_peak_4668	chr10	68165191	68166198
2_wt.q.05_peak_24918	chr2	44104338	44105032
2_wt.q.05_peak_20748	chr17	80958276	80958842
2_wt.q.05_peak_19092	chr16	84955043	84955890
2_wt.q.05_peak_21493	chr18	33443470	33443975
2_wt.q.05_peak_43495	chr9	27109058	27111309
2_wt.q.05_peak_33832	chr5	39416692	39417093
2_wt.q.05_peak_11585	chr13	34272770	34273190
2_wt.q.05_peak_1107	chr1	64066414	64067819
2_wt.q.05_peak_32911	chr4	145105089	145105911
2_wt.q.05_peak_25023	chr2	48423681	48423958
2_wt.q.05_peak_20527	chr17	70442641	70443780
2_wt.q.05_peak_1167	chr1	66279259	66279931
2_wt.q.05_peak_25934	chr2	92052240	92052883
2_wt.q.05_peak_9445	chr12	36150854	36151477
2_wt.q.05_peak_14290	chr14	60409845	60411133
2_wt.q.05_peak_8764	chr11	118897895	118898225
2_wt.q.05_peak_28259	chr3	39592122	39592860
2_wt.q.05_peak_11732	chr13	42821700	42822673
2_wt.q.05_peak_37009	chr6	80077884	80078685
2_wt.q.05_peak_32361	chr4	123535039	123535934
2_wt.q.05_peak_2518	chr1	154729841	154730326
2_wt.q.05_peak_18850	chr16	67124468	67125029
2_wt.q.05_peak_22272	chr18	65677538	65678054
2_wt.q.05_peak_816	chr1	51836777	51838763
2_wt.q.05_peak_7165	chr11	60248187	60249553
2_wt.q.05_peak_5030	chr10	84357473	84359365
2_wt.q.05_peak_5290	chr10	95544565	95545193
2_wt.q.05_peak_27511	chr2	161859094	161859391
2_wt.q.05_peak_17288	chr15	95487550	95488462
2_wt.q.05_peak_3657	chr10	9649837	9650449
2_wt.q.05_peak_2978	chr1	170506085	170506950
2_wt.q.05_peak_44014	chr9	47659396	47660273
2_wt.q.05_peak_1242	chr1	72457380	72458111
2_wt.q.05_peak_20565	chr17	70629377	70630862
2_wt.q.05_peak_13848	chr14	29519536	29520212
2_wt.q.05_peak_34209	chr5	67697843	67698361
2_wt.q.05_peak_27639	chr2	167299117	167300266
2_wt.q.05_peak_36164	chr6	28615205	28616610
2_wt.q.05_peak_21275	chr18	21193412	21193682
2_wt.q.05_peak_28862	chr3	80083863	80084837
2_wt.q.05_peak_31827	chr4	91233428	91234663
2_wt.q.05_peak_22347	chr18	68055499	68055762
2_wt.q.05_peak_12557	chr13	83654823	83661140
2_wt.q.05_peak_16451	chr15	64092534	64093302
2_wt.q.05_peak_629	chr1	39962955	39963458
2_wt.q.05_peak_31910	chr4	97941616	97942294
2_wt.q.05_peak_31476	chr4	70229810	70230697
2_wt.q.05_peak_7607	chr11	77951042	77951754
2_wt.q.05_peak_17030	chr15	83997638	83998824
2_wt.q.05_peak_40442	chr7	120647404	120648253
2_wt.q.05_peak_43530	chr9	27728714	27729058
2_wt.q.05_peak_10648	chr12	100291084	100292199
2_wt.q.05_peak_24608	chr2	30885722	30886440
2_wt.q.05_peak_22266	chr18	65565123	65566205
2_wt.q.05_peak_6447	chr11	25715863	25716221
2_wt.q.05_peak_14940	chr14	93675460	93676382
2_wt.q.05_peak_16705	chr15	73470197	73470670
2_wt.q.05_peak_37408	chr6	98384324	98385155
2_wt.q.05_peak_21817	chr18	42890000	42890616
2_wt.q.05_peak_2166	chr1	135380271	135381412
2_wt.q.05_peak_22237	chr18	65041403	65043132
2_wt.q.05_peak_12407	chr13	77295273	77295934
2_wt.q.05_peak_43700	chr9	36881032	36882072
2_wt.q.05_peak_41914	chr8	64643809	64644697
2_wt.q.05_peak_21368	chr18	25554554	25555217
2_wt.q.05_peak_22650	chr18	83656460	83657294
2_wt.q.05_peak_6659	chr11	35914472	35915465
2_wt.q.05_peak_22271	chr18	65674447	65675347
2_wt.q.05_peak_10522	chr12	95314872	95316038
2_wt.q.05_peak_8517	chr11	108150423	108151018
2_wt.q.05_peak_32777	chr4	138085086	138085628
2_wt.q.05_peak_27086	chr2	143099433	143100911
2_wt.q.05_peak_8623	chr11	113439842	113440413
2_wt.q.05_peak_33269	chr5	14526038	14526434
2_wt.q.05_peak_6419	chr11	24106632	24107805
2_wt.q.05_peak_29599	chr3	108356604	108359710
2_wt.q.05_peak_30161	chr3	138876581	138877521
2_wt.q.05_peak_9521	chr12	42137388	42138054
2_wt.q.05_peak_14419	chr14	64530915	64532381
2_wt.q.05_peak_24849	chr2	41669359	41669637
2_wt.q.05_peak_35589	chr5	139430309	139430785
2_wt.q.05_peak_33011	chr4	150583405	150584236
2_wt.q.05_peak_24538	chr2	28387150	28387923
2_wt.q.05_peak_14880	chr14	86730397	86730938
2_wt.q.05_peak_36235	chr6	30572141	30573351
2_wt.q.05_peak_9620	chr12	49973559	49974053
2_wt.q.05_peak_24853	chr2	41980237	41981312
2_wt.q.05_peak_3771	chr10	14084873	14085711
2_wt.q.05_peak_13102	chr13	104961995	104963606
2_wt.q.05_peak_44954	chr9	89850171	89850948
2_wt.q.05_peak_34286	chr5	71970324	71970831
2_wt.q.05_peak_5306	chr10	97716990	97719338
2_wt.q.05_peak_42034	chr8	68830531	68831183
2_wt.q.05_peak_15832	chr15	30718771	30719626
2_wt.q.05_peak_6069	chr11	3337072	3337733
2_wt.q.05_peak_6664	chr11	35990915	35992510
2_wt.q.05_peak_10264	chr12	82411915	82413284
2_wt.q.05_peak_43830	chr9	41011834	41012408
2_wt.q.05_peak_31957	chr4	101450149	101451002
2_wt.q.05_peak_3610	chr10	6936269	6937596
2_wt.q.05_peak_40288	chr7	112335606	112336864
2_wt.q.05_peak_39952	chr7	96838333	96839562
2_wt.q.05_peak_20514	chr17	70294010	70294548
2_wt.q.05_peak_34287	chr5	71972133	71973569
2_wt.q.05_peak_23249	chr19	26731491	26732180
2_wt.q.05_peak_43877	chr9	42182981	42184144
2_wt.q.05_peak_32292	chr4	120023028	120024446
2_wt.q.05_peak_23224	chr19	24326076	24326665
2_wt.q.05_peak_2434	chr1	151890141	151890456
2_wt.q.05_peak_19526	chr17	12211779	12212673
2_wt.q.05_peak_361	chr1	25697274	25697642
2_wt.q.05_peak_34345	chr5	74019036	74019322
2_wt.q.05_peak_13223	chr13	110116664	110117399
2_wt.q.05_peak_37025	chr6	81660031	81660403
2_wt.q.05_peak_43265	chr9	14058689	14059750
2_wt.q.05_peak_24910	chr2	44033132	44033712
2_wt.q.05_peak_36240	chr6	30747952	30748292
2_wt.q.05_peak_4000	chr10	26297016	26298151
2_wt.q.05_peak_7293	chr11	67588661	67588977
2_wt.q.05_peak_12897	chr13	97632937	97635267
2_wt.q.05_peak_4253	chr10	40918666	40919499
2_wt.q.05_peak_15536	chr15	12135036	12136574
2_wt.q.05_peak_39233	chr7	58843291	58844865
2_wt.q.05_peak_36916	chr6	71772076	71772850
2_wt.q.05_peak_27060	chr2	142334011	142335107
2_wt.q.05_peak_40752	chr7	132253446	132254007
2_wt.q.05_peak_15503	chr15	10840173	10841150
2_wt.q.05_peak_12486	chr13	82316112	82318867
2_wt.q.05_peak_6328	chr11	20647290	20648203
2_wt.q.05_peak_28594	chr3	61535640	61536428
2_wt.q.05_peak_13801	chr14	27661816	27662554
2_wt.q.05_peak_45131	chr9	101445989	101446796
2_wt.q.05_peak_17026	chr15	83847277	83848777
2_wt.q.05_peak_17283	chr15	95428920	95430467
2_wt.q.05_peak_40579	chr7	124681454	124682247
2_wt.q.05_peak_31618	chr4	81550736	81551416
2_wt.q.05_peak_16125	chr15	42309412	42310938
2_wt.q.05_peak_31831	chr4	91291143	91292530
2_wt.q.05_peak_789	chr1	50980220	50981903
2_wt.q.05_peak_24728	chr2	34545788	34546703
2_wt.q.05_peak_3407	chr1	191381830	191382155
2_wt.q.05_peak_13785	chr14	27268535	27269930
2_wt.q.05_peak_45288	chr9	107086927	107088097
2_wt.q.05_peak_25846	chr2	90567841	90568820
2_wt.q.05_peak_328	chr1	25081320	25082866
2_wt.q.05_peak_16167	chr15	44669733	44670424
2_wt.q.05_peak_2623	chr1	157512474	157514300
2_wt.q.05_peak_25142	chr2	55479078	55481111
2_wt.q.05_peak_1714	chr1	98189962	98191125
2_wt.q.05_peak_22431	chr18	69638514	69639325
2_wt.q.05_peak_19018	chr16	77661171	77662503
2_wt.q.05_peak_21836	chr18	43658979	43660583
2_wt.q.05_peak_13421	chr14	8502387	8503446
2_wt.q.05_peak_32861	chr4	140713809	140714700
2_wt.q.05_peak_10572	chr12	98106051	98106551
2_wt.q.05_peak_10307	chr12	83850111	83851394
2_wt.q.05_peak_25161	chr2	57900454	57900723
2_wt.q.05_peak_22013	chr18	54972572	54973014
2_wt.q.05_peak_19530	chr17	12277912	12278843
2_wt.q.05_peak_9655	chr12	51118090	51118863
2_wt.q.05_peak_30583	chr4	6791866	6793724
2_wt.q.05_peak_31884	chr4	96718400	96719732
2_wt.q.05_peak_37620	chr6	108309378	108310011
2_wt.q.05_peak_44277	chr9	57565767	57566588
2_wt.q.05_peak_40030	chr7	99955934	99958180
2_wt.q.05_peak_29565	chr3	107807398	107807797
2_wt.q.05_peak_24518	chr2	28066673	28068624
2_wt.q.05_peak_36383	chr6	35598059	35599556
2_wt.q.05_peak_651	chr1	42007798	42008199
2_wt.q.05_peak_8707	chr11	117101274	117102401
2_wt.q.05_peak_7271	chr11	65930491	65931327
2_wt.q.05_peak_1979	chr1	128081911	128082624
2_wt.q.05_peak_1045	chr1	60481115	60481995
2_wt.q.05_peak_25483	chr2	70886768	70887832
2_wt.q.05_peak_23184	chr19	22978901	22979593
2_wt.q.05_peak_31489	chr4	70521239	70522155
2_wt.q.05_peak_5133	chr10	90493957	90495251
2_wt.q.05_peak_2613	chr1	157417301	157417963
2_wt.q.05_peak_969	chr1	56939335	56939621
2_wt.q.05_peak_41397	chr8	28871110	28871403
2_wt.q.05_peak_18162	chr16	31189120	31189633
2_wt.q.05_peak_19001	chr16	77408951	77409736
2_wt.q.05_peak_35621	chr5	142433427	142434490
2_wt.q.05_peak_30020	chr3	133672753	133673292
2_wt.q.05_peak_39301	chr7	64588240	64589594
2_wt.q.05_peak_34362	chr5	74254398	74255752
2_wt.q.05_peak_26096	chr2	102052582	102053069
2_wt.q.05_peak_10377	chr12	86157941	86158676
2_wt.q.05_peak_11155	chr13	10653282	10654192
2_wt.q.05_peak_19352	chr17	3243744	3244174
2_wt.q.05_peak_21135	chr18	10738937	10740244
2_wt.q.05_peak_37114	chr6	86102789	86103461
2_wt.q.05_peak_25421	chr2	68895826	68897003
2_wt.q.05_peak_39680	chr7	84284755	84285325
2_wt.q.05_peak_32946	chr4	149277270	149278694
2_wt.q.05_peak_46153	chrX	103563542	103564362
2_wt.q.05_peak_40389	chr7	117490348	117490715
2_wt.q.05_peak_33938	chr5	46202131	46203060
2_wt.q.05_peak_19385	chr17	5058122	5058751
2_wt.q.05_peak_13496	chr14	12777559	12778819
2_wt.q.05_peak_40359	chr7	116181305	116181971
2_wt.q.05_peak_10583	chr12	98458242	98459267
2_wt.q.05_peak_28082	chr3	28466701	28467887
2_wt.q.05_peak_29686	chr3	117006888	117007737
2_wt.q.05_peak_27181	chr2	146289386	146290067
2_wt.q.05_peak_6110	chr11	4661160	4662654
2_wt.q.05_peak_9226	chr12	27977842	27979026
2_wt.q.05_peak_27159	chr2	145383105	145383646
2_wt.q.05_peak_27070	chr2	142731142	142732532
2_wt.q.05_peak_11474	chr13	24576403	24577159
2_wt.q.05_peak_24167	chr2	7617701	7620098
2_wt.q.05_peak_26621	chr2	124290958	124291802
2_wt.q.05_peak_10791	chr12	106185597	106186315
2_wt.q.05_peak_30958	chr4	33526296	33526841
2_wt.q.05_peak_8523	chr11	108221147	108222433
2_wt.q.05_peak_34289	chr5	71986552	71987694
2_wt.q.05_peak_12679	chr13	91564226	91565446
2_wt.q.05_peak_12711	chr13	92636907	92637508
2_wt.q.05_peak_6572	chr11	31694706	31695504
2_wt.q.05_peak_10344	chr12	85436193	85436969
2_wt.q.05_peak_24256	chr2	12778543	12779134
2_wt.q.05_peak_2638	chr1	158191585	158193330
2_wt.q.05_peak_23263	chr19	27260351	27261192
2_wt.q.05_peak_35638	chr5	142879642	142880670
2_wt.q.05_peak_37775	chr6	113990933	113992028
2_wt.q.05_peak_14720	chr14	75849175	75850853
2_wt.q.05_peak_14417	chr14	64524428	64524812
2_wt.q.05_peak_39951	chr7	96819300	96820069
2_wt.q.05_peak_12712	chr13	92638648	92640147
2_wt.q.05_peak_41504	chr8	36019859	36020227
2_wt.q.05_peak_5528	chr10	108260430	108261419
2_wt.q.05_peak_37807	chr6	115123469	115123735
2_wt.q.05_peak_10099	chr12	75478001	75478660
2_wt.q.05_peak_20219	chr17	50640757	50642032
2_wt.q.05_peak_39425	chr7	72590081	72593469
2_wt.q.05_peak_37707	chr6	112728630	112729307
2_wt.q.05_peak_1166	chr1	66277869	66278451
2_wt.q.05_peak_14867	chr14	84541649	84542048
2_wt.q.05_peak_40073	chr7	100812535	100813267
2_wt.q.05_peak_141	chr1	13573834	13574655
2_wt.q.05_peak_17470	chr15	100922716	100924415
2_wt.q.05_peak_42623	chr8	98861918	98862331
2_wt.q.05_peak_37470	chr6	101354419	101355728
2_wt.q.05_peak_14758	chr14	76792094	76792925
2_wt.q.05_peak_35234	chr5	124217603	124219968
2_wt.q.05_peak_13920	chr14	31857151	31858296
2_wt.q.05_peak_28874	chr3	80254929	80255937
2_wt.q.05_peak_33902	chr5	44536487	44538680
2_wt.q.05_peak_14337	chr14	62721294	62722130
2_wt.q.05_peak_17519	chr15	102546568	102547361
2_wt.q.05_peak_7048	chr11	54776699	54777616
2_wt.q.05_peak_10700	chr12	100762910	100763177
2_wt.q.05_peak_12314	chr13	70277185	70278240
2_wt.q.05_peak_10118	chr12	76307825	76308569
2_wt.q.05_peak_1011	chr1	58736865	58737550
2_wt.q.05_peak_39957	chr7	96985798	96986326
2_wt.q.05_peak_2473	chr1	153308092	153309332
2_wt.q.05_peak_31613	chr4	81180490	81181021
2_wt.q.05_peak_24255	chr2	12776845	12778183
2_wt.q.05_peak_24955	chr2	45017443	45019140
2_wt.q.05_peak_9659	chr12	51187882	51189051
2_wt.q.05_peak_30925	chr4	32289004	32289391
2_wt.q.05_peak_30299	chr3	146380796	146381409
2_wt.q.05_peak_19292	chr16	95769220	95770870
2_wt.q.05_peak_31537	chr4	76370112	76370657
2_wt.q.05_peak_16285	chr15	53257545	53258875
2_wt.q.05_peak_36717	chr6	54538956	54539319
2_wt.q.05_peak_23411	chr19	36213485	36214537
2_wt.q.05_peak_26971	chr2	136800961	136801413
2_wt.q.05_peak_33826	chr5	39052611	39053510
2_wt.q.05_peak_28473	chr3	55283813	55284307
2_wt.q.05_peak_8078	chr11	97302362	97302821
2_wt.q.05_peak_39932	chr7	96437942	96438532
2_wt.q.05_peak_30119	chr3	137512892	137513693
2_wt.q.05_peak_19270	chr16	94825390	94826071
2_wt.q.05_peak_35419	chr5	131814340	131814946
2_wt.q.05_peak_35092	chr5	121119699	121120246
2_wt.q.05_peak_303	chr1	24226500	24227531
2_wt.q.05_peak_28551	chr3	58091359	58092412
2_wt.q.05_peak_2973	chr1	170410774	170411464
2_wt.q.05_peak_25199	chr2	59258580	59259455
2_wt.q.05_peak_28368	chr3	50983471	50984539
2_wt.q.05_peak_27328	chr2	154537240	154539157
2_wt.q.05_peak_19257	chr16	94601326	94602031
2_wt.q.05_peak_21134	chr18	10737626	10738332
2_wt.q.05_peak_18930	chr16	72914020	72914899
2_wt.q.05_peak_18659	chr16	52134147	52135770
2_wt.q.05_peak_7717	chr11	80518421	80519063
2_wt.q.05_peak_8704	chr11	117029098	117031716
2_wt.q.05_peak_26616	chr2	123365158	123365703
2_wt.q.05_peak_497	chr1	35935233	35935759
2_wt.q.05_peak_28089	chr3	28555266	28555882
2_wt.q.05_peak_3573	chr10	5234639	5235658
2_wt.q.05_peak_11724	chr13	42760327	42761719
2_wt.q.05_peak_18286	chr16	34228912	34229615
2_wt.q.05_peak_21235	chr18	16681004	16683472
2_wt.q.05_peak_14379	chr14	64200831	64203087
2_wt.q.05_peak_35747	chr5	147463336	147463946
2_wt.q.05_peak_39541	chr7	79288112	79290042
2_wt.q.05_peak_9252	chr12	28974784	28975895
2_wt.q.05_peak_17852	chr16	16913139	16913962
2_wt.q.05_peak_9032	chr12	12220309	12221286
2_wt.q.05_peak_44290	chr9	57901687	57902200
2_wt.q.05_peak_21808	chr18	42690318	42691313
2_wt.q.05_peak_1086	chr1	63459601	63461098
2_wt.q.05_peak_27526	chr2	163244152	163244634
2_wt.q.05_peak_6617	chr11	32498546	32499292
2_wt.q.05_peak_36401	chr6	36776356	36778104
2_wt.q.05_peak_35160	chr5	122653931	122654273
2_wt.q.05_peak_17857	chr16	16931405	16931712
2_wt.q.05_peak_32776	chr4	138068044	138069958
2_wt.q.05_peak_43507	chr9	27286033	27287132
2_wt.q.05_peak_44866	chr9	83608012	83608658
2_wt.q.05_peak_37298	chr6	92467466	92468038
2_wt.q.05_peak_15279	chr14	119665741	119666263
2_wt.q.05_peak_43414	chr9	24186049	24186985
2_wt.q.05_peak_24558	chr2	29468082	29469211
2_wt.q.05_peak_23762	chr19	51059818	51060588
2_wt.q.05_peak_19083	chr16	84369037	84369626
2_wt.q.05_peak_2022	chr1	131115923	131117384
2_wt.q.05_peak_43240	chr9	9819847	9820555
2_wt.q.05_peak_1939	chr1	126470079	126470603
2_wt.q.05_peak_21993	chr18	54073692	54074386
2_wt.q.05_peak_6592	chr11	31942043	31942380
2_wt.q.05_peak_38782	chr7	28952707	28954175
2_wt.q.05_peak_10568	chr12	97836478	97836873
2_wt.q.05_peak_37845	chr6	115890619	115892068
2_wt.q.05_peak_44863	chr9	83596059	83596606
2_wt.q.05_peak_30582	chr4	6786301	6787631
2_wt.q.05_peak_45720	chr9	121506491	121507203
2_wt.q.05_peak_18539	chr16	43946047	43947009
2_wt.q.05_peak_42664	chr8	102725342	102725621
2_wt.q.05_peak_18190	chr16	31764111	31765740
2_wt.q.05_peak_11315	chr13	18956728	18957459
2_wt.q.05_peak_13947	chr14	33548326	33548976
2_wt.q.05_peak_41068	chr8	11629667	11630581
2_wt.q.05_peak_11879	chr13	46550162	46550880
2_wt.q.05_peak_24190	chr2	8061327	8062548
2_wt.q.05_peak_45183	chr9	104128090	104128579
2_wt.q.05_peak_21812	chr18	42792746	42793771
2_wt.q.05_peak_9378	chr12	33035450	33035745
2_wt.q.05_peak_2493	chr1	154149966	154150896
2_wt.q.05_peak_9708	chr12	53033103	53034297
2_wt.q.05_peak_12966	chr13	99366239	99367524
2_wt.q.05_peak_3842	chr10	18069777	18070870
2_wt.q.05_peak_36347	chr6	33763087	33763674
2_wt.q.05_peak_25314	chr2	63453269	63455090
2_wt.q.05_peak_30172	chr3	139030383	139031418
2_wt.q.05_peak_15702	chr15	25372775	25373478
2_wt.q.05_peak_34574	chr5	92933191	92933980
2_wt.q.05_peak_24040	chr2	6594239	6594573
2_wt.q.05_peak_8435	chr11	105835818	105836774
2_wt.q.05_peak_32332	chr4	122891273	122892297
2_wt.q.05_peak_19102	chr16	85110224	85110810
2_wt.q.05_peak_28604	chr3	62412573	62413054
2_wt.q.05_peak_25313	chr2	63452261	63453000
2_wt.q.05_peak_32053	chr4	104597243	104598209
2_wt.q.05_peak_3132	chr1	176932706	176934670
2_wt.q.05_peak_44992	chr9	94358457	94359038
2_wt.q.05_peak_44425	chr9	62554565	62555087
2_wt.q.05_peak_17596	chr16	5071374	5072484
2_wt.q.05_peak_11790	chr13	44232842	44233103
2_wt.q.05_peak_2277	chr1	140338404	140339905
2_wt.q.05_peak_46139	chrX	101993751	101994557
2_wt.q.05_peak_611	chr1	39446085	39446781
2_wt.q.05_peak_45128	chr9	101180103	101180693
2_wt.q.05_peak_29934	chr3	127293317	127294103
2_wt.q.05_peak_3460	chr1	192444383	192444871
2_wt.q.05_peak_32193	chr4	114475716	114476976
2_wt.q.05_peak_13748	chr14	24911367	24911805
2_wt.q.05_peak_34482	chr5	84324780	84325577
2_wt.q.05_peak_10387	chr12	86805617	86806390
2_wt.q.05_peak_27441	chr2	157529998	157530887
2_wt.q.05_peak_41368	chr8	26808123	26809057
2_wt.q.05_peak_1401	chr1	80853683	80855872
2_wt.q.05_peak_3695	chr10	10928500	10929495
2_wt.q.05_peak_23952	chr2	3172201	3173339
2_wt.q.05_peak_39841	chr7	91430462	91432766
2_wt.q.05_peak_1674	chr1	97614666	97615884
2_wt.q.05_peak_23076	chr19	16251018	16251650
2_wt.q.05_peak_11776	chr13	43524055	43526191
2_wt.q.05_peak_21293	chr18	22820703	22821476
2_wt.q.05_peak_14643	chr14	73226885	73227861
2_wt.q.05_peak_18783	chr16	63090976	63091525
2_wt.q.05_peak_24158	chr2	7438479	7439521
2_wt.q.05_peak_32988	chr4	150339160	150339861
2_wt.q.05_peak_29770	chr3	120570354	120571798
2_wt.q.05_peak_10613	chr12	99375936	99376391
2_wt.q.05_peak_8047	chr11	95494191	95494831
2_wt.q.05_peak_3785	chr10	14209898	14212557
2_wt.q.05_peak_28215	chr3	36479021	36479430
2_wt.q.05_peak_32047	chr4	104458275	104459346
2_wt.q.05_peak_32888	chr4	141857411	141858297
2_wt.q.05_peak_37336	chr6	93845022	93845668
2_wt.q.05_peak_26849	chr2	132754190	132754719
2_wt.q.05_peak_12430	chr13	78570896	78571395
2_wt.q.05_peak_24123	chr2	7144672	7146538
2_wt.q.05_peak_15827	chr15	30569588	30570525
2_wt.q.05_peak_3772	chr10	14086042	14086467
2_wt.q.05_peak_28873	chr3	80249959	80250636
2_wt.q.05_peak_12488	chr13	82393138	82393934
2_wt.q.05_peak_14368	chr14	64140363	64140836
2_wt.q.05_peak_332	chr1	25104622	25107033
2_wt.q.05_peak_33097	chr4	155283303	155284222
2_wt.q.05_peak_34689	chr5	100200752	100201536
2_wt.q.05_peak_31912	chr4	98031585	98032561
2_wt.q.05_peak_20366	chr17	63326495	63326821
2_wt.q.05_peak_7428	chr11	71773828	71774461
2_wt.q.05_peak_39895	chr7	92366718	92367630
2_wt.q.05_peak_41551	chr8	39019817	39020551
2_wt.q.05_peak_16703	chr15	73440597	73441547
2_wt.q.05_peak_33224	chr5	9661803	9662484
2_wt.q.05_peak_27064	chr2	142646542	142648855
2_wt.q.05_peak_17864	chr16	17024167	17024991
2_wt.q.05_peak_8911	chr12	5154943	5155687
2_wt.q.05_peak_29711	chr3	117625061	117625792
2_wt.q.05_peak_24975	chr2	45071190	45072518
2_wt.q.05_peak_7860	chr11	86839853	86841069
2_wt.q.05_peak_12636	chr13	89146088	89147178
2_wt.q.05_peak_25076	chr2	52176450	52177159
2_wt.q.05_peak_570	chr1	38429261	38429720
2_wt.q.05_peak_30126	chr3	137647266	137648305
2_wt.q.05_peak_5894	chr10	122716506	122718893
2_wt.q.05_peak_37934	chr6	119521796	119522462
2_wt.q.05_peak_45341	chr9	108153746	108154585
2_wt.q.05_peak_5655	chr10	109843835	109844837
2_wt.q.05_peak_29884	chr3	126384550	126385557
2_wt.q.05_peak_9380	chr12	33061695	33062055
2_wt.q.05_peak_26513	chr2	119811136	119812359
2_wt.q.05_peak_6575	chr11	31770864	31771276
2_wt.q.05_peak_6791	chr11	42774882	42775623
2_wt.q.05_peak_27323	chr2	154473607	154475356
2_wt.q.05_peak_17775	chr16	12114829	12115635
2_wt.q.05_peak_12973	chr13	99495728	99496287
2_wt.q.05_peak_13473	chr14	12296219	12296983
2_wt.q.05_peak_15955	chr15	36942999	36943843
2_wt.q.05_peak_31226	chr4	48725628	48726236
2_wt.q.05_peak_33220	chr5	9570867	9571959
2_wt.q.05_peak_4488	chr10	58833644	58834363
2_wt.q.05_peak_41805	chr8	54992030	54992498
2_wt.q.05_peak_33577	chr5	27873280	27874836
2_wt.q.05_peak_24090	chr2	6910804	6912860
2_wt.q.05_peak_15080	chr14	103662663	103664370
2_wt.q.05_peak_36467	chr6	38846956	38847816
2_wt.q.05_peak_32775	chr4	138063205	138065025
2_wt.q.05_peak_8906	chr12	5088218	5088658
2_wt.q.05_peak_43900	chr9	42964137	42965302
2_wt.q.05_peak_36483	chr6	39515096	39516052
2_wt.q.05_peak_19772	chr17	26693319	26694317
2_wt.q.05_peak_30159	chr3	138860750	138861164
2_wt.q.05_peak_8145	chr11	98261102	98261586
2_wt.q.05_peak_21433	chr18	30529900	30530190
2_wt.q.05_peak_6918	chr11	49933615	49934900
2_wt.q.05_peak_35966	chr6	14408587	14409060
2_wt.q.05_peak_22125	chr18	60779504	60781158
2_wt.q.05_peak_45619	chr9	115338646	115339014
2_wt.q.05_peak_1878	chr1	121478478	121479156
2_wt.q.05_peak_12134	chr13	59148267	59149237
2_wt.q.05_peak_25607	chr2	75930596	75931456
2_wt.q.05_peak_37082	chr6	85217953	85219241
2_wt.q.05_peak_15686	chr15	24968478	24969736
2_wt.q.05_peak_15840	chr15	31022100	31022768
2_wt.q.05_peak_40225	chr7	111157531	111158382
2_wt.q.05_peak_37187	chr6	88605061	88605804
2_wt.q.05_peak_42537	chr8	93941345	93942169
2_wt.q.05_peak_14400	chr14	64372667	64373742
2_wt.q.05_peak_43429	chr9	24516357	24517262
2_wt.q.05_peak_28037	chr3	25773490	25774453
2_wt.q.05_peak_14960	chr14	95876989	95877775
2_wt.q.05_peak_41955	chr8	65922368	65922931
2_wt.q.05_peak_43543	chr9	27964803	27965668
2_wt.q.05_peak_30534	chr3	159885479	159886003
2_wt.q.05_peak_34805	chr5	107413279	107415825
2_wt.q.05_peak_37538	chr6	104761085	104762024
2_wt.q.05_peak_14182	chr14	54729150	54729460
2_wt.q.05_peak_22291	chr18	66780087	66781713
2_wt.q.05_peak_2579	chr1	156864294	156864858
2_wt.q.05_peak_22428	chr18	69630538	69631015
2_wt.q.05_peak_27448	chr2	157807594	157807901
2_wt.q.05_peak_30804	chr4	22300678	22301606
2_wt.q.05_peak_34492	chr5	85336990	85338364
2_wt.q.05_peak_45398	chr9	109968282	109970164
2_wt.q.05_peak_18540	chr16	43948002	43948352
2_wt.q.05_peak_26745	chr2	130469098	130469749
2_wt.q.05_peak_27436	chr2	157048625	157049356
2_wt.q.05_peak_41129	chr8	14501827	14502638
2_wt.q.05_peak_9238	chr12	28699516	28701612
2_wt.q.05_peak_10665	chr12	100393451	100393801
2_wt.q.05_peak_4815	chr10	75700844	75701954
2_wt.q.05_peak_34084	chr5	57849828	57850226
2_wt.q.05_peak_10707	chr12	100988501	100989632
2_wt.q.05_peak_29384	chr3	97941386	97942349
2_wt.q.05_peak_45646	chr9	118992425	118992851
2_wt.q.05_peak_41895	chr8	61306407	61307361
2_wt.q.05_peak_34111	chr5	62684067	62684481
2_wt.q.05_peak_42460	chr8	86712936	86714901
2_wt.q.05_peak_13432	chr14	9646200	9646835
2_wt.q.05_peak_20496	chr17	69767894	69770563
2_wt.q.05_peak_21350	chr18	24838947	24839422
2_wt.q.05_peak_34917	chr5	112525209	112525478
2_wt.q.05_peak_6668	chr11	36121207	36121546
2_wt.q.05_peak_13919	chr14	31854526	31856816
2_wt.q.05_peak_14098	chr14	47659299	47659749
2_wt.q.05_peak_21805	chr18	42625669	42626608
2_wt.q.05_peak_2223	chr1	137331698	137333037
2_wt.q.05_peak_16522	chr15	66513141	66514165
2_wt.q.05_peak_41220	chr8	17465098	17466362
2_wt.q.05_peak_23889	chr19	57577233	57577893
2_wt.q.05_peak_28294	chr3	41693351	41693727
2_wt.q.05_peak_36475	chr6	39225517	39226506
2_wt.q.05_peak_3277	chr1	181466260	181466809
2_wt.q.05_peak_2539	chr1	155202287	155202969
2_wt.q.05_peak_1678	chr1	97628137	97628612
2_wt.q.05_peak_33965	chr5	49460271	49461258
2_wt.q.05_peak_16741	chr15	74900997	74903763
2_wt.q.05_peak_18658	chr16	52114141	52114583
2_wt.q.05_peak_20798	chr17	84272929	84273817
2_wt.q.05_peak_27326	chr2	154525200	154526017
2_wt.q.05_peak_702	chr1	43501456	43503255
2_wt.q.05_peak_41067	chr8	11627840	11628934
2_wt.q.05_peak_43493	chr9	27091253	27092065
2_wt.q.05_peak_2470	chr1	153179963	153181468
2_wt.q.05_peak_19334	chr16	97288162	97288753
2_wt.q.05_peak_5311	chr10	97801398	97802880
2_wt.q.05_peak_45552	chr9	113247649	113249682
2_wt.q.05_peak_1964	chr1	127954555	127955215
2_wt.q.05_peak_44236	chr9	56451626	56452383
2_wt.q.05_peak_18695	chr16	55550590	55551943
2_wt.q.05_peak_17868	chr16	17055454	17056112
2_wt.q.05_peak_3544	chr1	195003124	195004431
2_wt.q.05_peak_16527	chr15	66679956	66680975
2_wt.q.05_peak_31571	chr4	77984974	77985318
2_wt.q.05_peak_41654	chr8	45689225	45690212
2_wt.q.05_peak_23772	chr19	53165335	53166008
2_wt.q.05_peak_9249	chr12	28871812	28872217
2_wt.q.05_peak_42246	chr8	79081526	79081958
2_wt.q.05_peak_27932	chr3	17846942	17848835
2_wt.q.05_peak_22353	chr18	68129712	68130394
2_wt.q.05_peak_16509	chr15	66239516	66239919
2_wt.q.05_peak_22081	chr18	59381677	59382434
2_wt.q.05_peak_15783	chr15	27883553	27884913
2_wt.q.05_peak_27791	chr2	181537551	181538316
2_wt.q.05_peak_34393	chr5	76540082	76541026
2_wt.q.05_peak_3133	chr1	176935757	176936477
2_wt.q.05_peak_11953	chr13	51930755	51931041
2_wt.q.05_peak_27058	chr2	142253724	142254515
2_wt.q.05_peak_10233	chr12	82103380	82106838
2_wt.q.05_peak_32091	chr4	106963872	106964868
2_wt.q.05_peak_14388	chr14	64263650	64264742
2_wt.q.05_peak_22224	chr18	64791052	64791921
2_wt.q.05_peak_28253	chr3	38989039	38989378
2_wt.q.05_peak_31890	chr4	96980077	96980805
2_wt.q.05_peak_1350	chr1	77544029	77546324
2_wt.q.05_peak_23867	chr19	57211377	57211996
2_wt.q.05_peak_25197	chr2	59181155	59182163
2_wt.q.05_peak_32947	chr4	149280330	149280878
2_wt.q.05_peak_26071	chr2	100314324	100314825
2_wt.q.05_peak_21890	chr18	46488877	46489531
2_wt.q.05_peak_8929	chr12	5353020	5354400
2_wt.q.05_peak_43469	chr9	25570567	25571344
2_wt.q.05_peak_30158	chr3	138853232	138855832
2_wt.q.05_peak_31998	chr4	102533292	102533790
2_wt.q.05_peak_43094	chr8	125557943	125559080
2_wt.q.05_peak_3518	chr1	194613845	194614397
2_wt.q.05_peak_24886	chr2	43646692	43647729
2_wt.q.05_peak_31904	chr4	97893911	97894797
2_wt.q.05_peak_43332	chr9	20682672	20683396
2_wt.q.05_peak_22221	chr18	64750782	64751896
2_wt.q.05_peak_5665	chr10	110308846	110310008
2_wt.q.05_peak_1495	chr1	85933333	85934211
2_wt.q.05_peak_44085	chr9	50121066	50121439
2_wt.q.05_peak_39943	chr7	96651291	96652525
2_wt.q.05_peak_3467	chr1	192557320	192558184
2_wt.q.05_peak_1444	chr1	83389087	83390235
2_wt.q.05_peak_1241	chr1	72439061	72439725
2_wt.q.05_peak_27693	chr2	172282841	172283900
2_wt.q.05_peak_39282	chr7	64032775	64033846
2_wt.q.05_peak_2921	chr1	168991434	168991966
2_wt.q.05_peak_25749	chr2	80731580	80732004
2_wt.q.05_peak_9113	chr12	16855730	16856475
2_wt.q.05_peak_27258	chr2	151513744	151514655
2_wt.q.05_peak_33824	chr5	38871203	38871481
2_wt.q.05_peak_9086	chr12	15122976	15123292
2_wt.q.05_peak_38285	chr6	140477970	140479630
2_wt.q.05_peak_16258	chr15	51834357	51834866
2_wt.q.05_peak_36804	chr6	58932532	58934213
2_wt.q.05_peak_23075	chr19	16242696	16243843
2_wt.q.05_peak_25498	chr2	71303076	71303598
2_wt.q.05_peak_4707	chr10	69746180	69746870
2_wt.q.05_peak_11473	chr13	24521379	24522735
2_wt.q.05_peak_22133	chr18	60824298	60825360
2_wt.q.05_peak_13045	chr13	102344546	102344908
2_wt.q.05_peak_2967	chr1	170367179	170367692
2_wt.q.05_peak_3461	chr1	192447272	192449030
2_wt.q.05_peak_7879	chr11	87245676	87248177
2_wt.q.05_peak_35023	chr5	116525414	116527441
2_wt.q.05_peak_38596	chr7	16956694	16957823
2_wt.q.05_peak_42030	chr8	68686884	68687902
2_wt.q.05_peak_45524	chr9	112454614	112455657
2_wt.q.05_peak_3953	chr10	22701364	22702400
2_wt.q.05_peak_37197	chr6	88742107	88742454
2_wt.q.05_peak_41892	chr8	61258723	61260025
2_wt.q.05_peak_30265	chr3	144424889	144425583
2_wt.q.05_peak_34606	chr5	96457464	96457884
2_wt.q.05_peak_43979	chr9	45663192	45663814
2_wt.q.05_peak_3761	chr10	14048312	14050029
2_wt.q.05_peak_20707	chr17	80168237	80168808
2_wt.q.05_peak_20619	chr17	73559309	73561816
2_wt.q.05_peak_44302	chr9	58066492	58066834
2_wt.q.05_peak_30113	chr3	137415201	137416854
2_wt.q.05_peak_27491	chr2	160954783	160955634
2_wt.q.05_peak_2770	chr1	163281633	163282457
2_wt.q.05_peak_31872	chr4	95666636	95667343
2_wt.q.05_peak_8627	chr11	113611891	113612596
2_wt.q.05_peak_32271	chr4	119245576	119246151
2_wt.q.05_peak_37284	chr6	92344567	92345863
2_wt.q.05_peak_37611	chr6	108248569	108250683
2_wt.q.05_peak_42049	chr8	69134063	69134735
2_wt.q.05_peak_42608	chr8	96256007	96256846
2_wt.q.05_peak_4039	chr10	28436278	28436691
2_wt.q.05_peak_2246	chr1	137972503	137973444
2_wt.q.05_peak_42429	chr8	86158382	86159925
2_wt.q.05_peak_12827	chr13	95849537	95850219
2_wt.q.05_peak_41819	chr8	55048160	55048772
2_wt.q.05_peak_31709	chr4	85226495	85228132
2_wt.q.05_peak_16906	chr15	79763866	79765454
2_wt.q.05_peak_3272	chr1	181368616	181369910
2_wt.q.05_peak_32817	chr4	138691022	138691979
2_wt.q.05_peak_12732	chr13	93056672	93060135
2_wt.q.05_peak_37339	chr6	93893784	93894625
2_wt.q.05_peak_18219	chr16	32153937	32155323
2_wt.q.05_peak_39791	chr7	90693279	90693709
2_wt.q.05_peak_46309	chrX	158744567	158745042
2_wt.q.05_peak_9360	chr12	32017458	32018088
2_wt.q.05_peak_42903	chr8	114295310	114295576
2_wt.q.05_peak_39232	chr7	58821997	58822876
2_wt.q.05_peak_4403	chr10	52992266	52992948
2_wt.q.05_peak_21809	chr18	42708646	42709556
2_wt.q.05_peak_36165	chr6	28618288	28618883
2_wt.q.05_peak_26531	chr2	120413693	120416132
2_wt.q.05_peak_29723	chr3	117839780	117840564
2_wt.q.05_peak_31788	chr4	87865563	87867025
2_wt.q.05_peak_25880	chr2	90974534	90975992
2_wt.q.05_peak_18124	chr16	29216247	29217881
2_wt.q.05_peak_34357	chr5	74189415	74190393
2_wt.q.05_peak_9636	chr12	50281478	50282212
2_wt.q.05_peak_33920	chr5	45195699	45197083
2_wt.q.05_peak_20846	chr17	86366757	86367525
2_wt.q.05_peak_22351	chr18	68124061	68125259
2_wt.q.05_peak_9330	chr12	31532217	31533890
2_wt.q.05_peak_31712	chr4	85260534	85261897
2_wt.q.05_peak_5118	chr10	89995343	89996488
2_wt.q.05_peak_43261	chr9	13694132	13694577
2_wt.q.05_peak_34363	chr5	74259908	74261480
2_wt.q.05_peak_31830	chr4	91266052	91267203
2_wt.q.05_peak_16609	chr15	68976842	68978085
2_wt.q.05_peak_7086	chr11	57030285	57031418
2_wt.q.05_peak_6636	chr11	35011490	35012414
2_wt.q.05_peak_39095	chr7	49373386	49374655
2_wt.q.05_peak_15765	chr15	27751959	27752749
2_wt.q.05_peak_35365	chr5	129393894	129394875
2_wt.q.05_peak_35646	chr5	142967770	142969596
2_wt.q.05_peak_10265	chr12	82414885	82416658
2_wt.q.05_peak_17865	chr16	17029447	17031040
2_wt.q.05_peak_4394	chr10	52786882	52787705
2_wt.q.05_peak_4882	chr10	78325678	78326348
2_wt.q.05_peak_25184	chr2	58586024	58586956
2_wt.q.05_peak_23913	chr19	58829891	58830301
2_wt.q.05_peak_30955	chr4	33498150	33498597
2_wt.q.05_peak_32031	chr4	103881441	103882461
2_wt.q.05_peak_24539	chr2	28412837	28413404
2_wt.q.05_peak_29828	chr3	122814406	122815195
2_wt.q.05_peak_16485	chr15	64831652	64832235
2_wt.q.05_peak_13492	chr14	12578133	12578393
2_wt.q.05_peak_15041	chr14	103079417	103080021
2_wt.q.05_peak_24870	chr2	42783676	42784158
2_wt.q.05_peak_21767	chr18	40629471	40629885
2_wt.q.05_peak_43497	chr9	27123723	27124834
2_wt.q.05_peak_36278	chr6	31192931	31194122
2_wt.q.05_peak_38280	chr6	140447818	140448642
2_wt.q.05_peak_41233	chr8	17663443	17664890
2_wt.q.05_peak_11208	chr13	13573736	13574649
2_wt.q.05_peak_2227	chr1	137545638	137546438
2_wt.q.05_peak_11999	chr13	54312503	54313566
2_wt.q.05_peak_7193	chr11	61448877	61449153
2_wt.q.05_peak_24116	chr2	7087220	7087968
2_wt.q.05_peak_44459	chr9	64228459	64229583
2_wt.q.05_peak_3134	chr1	176939578	176940464
2_wt.q.05_peak_4714	chr10	69803078	69803663
2_wt.q.05_peak_43401	chr9	23497494	23498194
2_wt.q.05_peak_23070	chr19	16167111	16167745
2_wt.q.05_peak_4806	chr10	75118259	75118536
2_wt.q.05_peak_31716	chr4	85300368	85302078
2_wt.q.05_peak_1702	chr1	97961600	97962755
2_wt.q.05_peak_44186	chr9	53903437	53904120
2_wt.q.05_peak_4498	chr10	59094810	59095548
2_wt.q.05_peak_11070	chr13	6157108	6157827
2_wt.q.05_peak_37257	chr6	91359197	91359736
2_wt.q.05_peak_45082	chr9	98264592	98265195
2_wt.q.05_peak_5469	chr10	105926308	105927285
2_wt.q.05_peak_33182	chr5	7102386	7102739
2_wt.q.05_peak_8757	chr11	118759022	118759322
2_wt.q.05_peak_36976	chr6	77218535	77220097
2_wt.q.05_peak_31758	chr4	87062093	87063157
2_wt.q.05_peak_6660	chr11	35918878	35920896
2_wt.q.05_peak_31252	chr4	52331808	52332175
2_wt.q.05_peak_11459	chr13	24048750	24049451
2_wt.q.05_peak_42444	chr8	86389524	86391257
2_wt.q.05_peak_2658	chr1	158552985	158554177
2_wt.q.05_peak_22256	chr18	65150962	65151679
2_wt.q.05_peak_10262	chr12	82407344	82408885
2_wt.q.05_peak_39452	chr7	73584286	73585431
2_wt.q.05_peak_17525	chr15	102636115	102636538
2_wt.q.05_peak_10254	chr12	82368833	82370173
2_wt.q.05_peak_29449	chr3	102168930	102170050
2_wt.q.05_peak_14374	chr14	64171642	64172867
2_wt.q.05_peak_6132	chr11	5165503	5166096
2_wt.q.05_peak_35231	chr5	124173212	124174344
2_wt.q.05_peak_35044	chr5	118112641	118113138
2_wt.q.05_peak_12559	chr13	83662649	83664622
2_wt.q.05_peak_31924	chr4	98598640	98599078
2_wt.q.05_peak_1332	chr1	77027778	77028151
2_wt.q.05_peak_8928	chr12	5340442	5340746
2_wt.q.05_peak_16517	chr15	66475804	66477370
2_wt.q.05_peak_44081	chr9	49989446	49990650
2_wt.q.05_peak_9759	chr12	58429886	58430731
2_wt.q.05_peak_12520	chr13	83375882	83377060
2_wt.q.05_peak_8883	chr12	4373932	4374875
2_wt.q.05_peak_2447	chr1	152524043	152525059
2_wt.q.05_peak_39844	chr7	91442562	91443703
2_wt.q.05_peak_36803	chr6	58929802	58930591
2_wt.q.05_peak_38126	chr6	134647558	134649374
2_wt.q.05_peak_3793	chr10	14331909	14334002
2_wt.q.05_peak_10797	chr12	107093183	107093836
2_wt.q.05_peak_17171	chr15	91314297	91316009
2_wt.q.05_peak_6428	chr11	24161701	24162502
2_wt.q.05_peak_1429	chr1	82793585	82794021
2_wt.q.05_peak_35363	chr5	129136876	129139088
2_wt.q.05_peak_13409	chr14	7899631	7900777
2_wt.q.05_peak_12492	chr13	82507668	82509015
2_wt.q.05_peak_11531	chr13	29502929	29503902
2_wt.q.05_peak_27190	chr2	146502478	146503191
2_wt.q.05_peak_15819	chr15	30450271	30451363
2_wt.q.05_peak_26724	chr2	129820286	129820692
2_wt.q.05_peak_45573	chr9	113626363	113628038
2_wt.q.05_peak_36348	chr6	33802943	33805198
2_wt.q.05_peak_37289	chr6	92414776	92415753
2_wt.q.05_peak_32054	chr4	104644034	104644835
2_wt.q.05_peak_10075	chr12	74450048	74450729
2_wt.q.05_peak_34469	chr5	82898020	82899896
2_wt.q.05_peak_43306	chr9	16305532	16305920
2_wt.q.05_peak_32093	chr4	106996724	106997141
2_wt.q.05_peak_29685	chr3	116985040	116986627
2_wt.q.05_peak_25637	chr2	77589550	77589906
2_wt.q.05_peak_13753	chr14	25350554	25350884
2_wt.q.05_peak_18292	chr16	34252509	34253773
2_wt.q.05_peak_36177	chr6	28781283	28782124
2_wt.q.05_peak_43404	chr9	23580971	23582234
2_wt.q.05_peak_37046	chr6	83408063	83409145
2_wt.q.05_peak_31228	chr4	48924201	48925254
2_wt.q.05_peak_7072	chr11	56169374	56169880
2_wt.q.05_peak_18317	chr16	34441673	34442072
2_wt.q.05_peak_22392	chr18	69428576	69430226
2_wt.q.05_peak_41939	chr8	64925879	64926996
2_wt.q.05_peak_36072	chr6	21424347	21425080
2_wt.q.05_peak_10115	chr12	76280365	76281666
2_wt.q.05_peak_2713	chr1	160291991	160292803
2_wt.q.05_peak_39333	chr7	65356244	65357474
2_wt.q.05_peak_45166	chr9	103558183	103559040
2_wt.q.05_peak_38659	chr7	24429239	24430014
2_wt.q.05_peak_27999	chr3	21644399	21645734
2_wt.q.05_peak_15906	chr15	34685770	34686338
2_wt.q.05_peak_31645	chr4	82439682	82440871
2_wt.q.05_peak_9546	chr12	44380162	44381515
2_wt.q.05_peak_43130	chr8	126536850	126537795
2_wt.q.05_peak_39296	chr7	64566240	64567600
2_wt.q.05_peak_15815	chr15	30270774	30271738
2_wt.q.05_peak_36507	chr6	39918819	39919401
2_wt.q.05_peak_28953	chr3	82274768	82276065
2_wt.q.05_peak_19104	chr16	85137073	85138539
2_wt.q.05_peak_412	chr1	30755118	30756497
2_wt.q.05_peak_25257	chr2	62339118	62339560
2_wt.q.05_peak_32263	chr4	119098367	119099455
2_wt.q.05_peak_32555	chr4	129701758	129703391
2_wt.q.05_peak_1579	chr1	90284150	90284866
2_wt.q.05_peak_42168	chr8	73131929	73132857
2_wt.q.05_peak_11723	chr13	42758837	42759779
2_wt.q.05_peak_30404	chr3	153484488	153485180
2_wt.q.05_peak_26950	chr2	136668645	136671631
2_wt.q.05_peak_36249	chr6	31076982	31079011
2_wt.q.05_peak_36011	chr6	17760975	17761797
2_wt.q.05_peak_9550	chr12	44432880	44433308
2_wt.q.05_peak_25338	chr2	65689950	65691379
2_wt.q.05_peak_8946	chr12	6637500	6639434
2_wt.q.05_peak_8760	chr11	118792514	118793482
2_wt.q.05_peak_24107	chr2	7056082	7056470
2_wt.q.05_peak_8794	chr11	119990552	119991730
2_wt.q.05_peak_5836	chr10	118781513	118782121
2_wt.q.05_peak_28090	chr3	28558083	28558581
2_wt.q.05_peak_32978	chr4	149989733	149990066
2_wt.q.05_peak_2540	chr1	155205684	155205984
2_wt.q.05_peak_15687	chr15	24989742	24990609
2_wt.q.05_peak_20300	chr17	56371200	56371503
2_wt.q.05_peak_45488	chr9	112174268	112174958
2_wt.q.05_peak_8671	chr11	115673145	115674956
2_wt.q.05_peak_2017	chr1	131086067	131086689
2_wt.q.05_peak_32155	chr4	110249419	110250104
2_wt.q.05_peak_4587	chr10	63839229	63839567
2_wt.q.05_peak_6509	chr11	29428038	29429727
2_wt.q.05_peak_43	chr1	7104542	7105923
2_wt.q.05_peak_41796	chr8	54894306	54894840
2_wt.q.05_peak_20930	chr17	90080022	90080415
2_wt.q.05_peak_27940	chr3	18421689	18422424
2_wt.q.05_peak_7784	chr11	84012511	84013551
2_wt.q.05_peak_25606	chr2	75929522	75929814
2_wt.q.05_peak_24727	chr2	34531631	34532118
2_wt.q.05_peak_37390	chr6	97216299	97216898
2_wt.q.05_peak_39480	chr7	75240122	75241524
2_wt.q.05_peak_14405	chr14	64402307	64405939
2_wt.q.05_peak_35967	chr6	14409582	14410576
2_wt.q.05_peak_39944	chr7	96676838	96678916
2_wt.q.05_peak_28782	chr3	75583288	75585716
2_wt.q.05_peak_13412	chr14	8032301	8032707
2_wt.q.05_peak_44109	chr9	51304691	51305094
2_wt.q.05_peak_38737	chr7	27601219	27602796
2_wt.q.05_peak_30273	chr3	144541939	144542690
2_wt.q.05_peak_9255	chr12	29140938	29142437
2_wt.q.05_peak_22027	chr18	56047606	56049302
2_wt.q.05_peak_27404	chr2	156665169	156666362
2_wt.q.05_peak_21814	chr18	42861512	42862133
2_wt.q.05_peak_5227	chr10	93192364	93193441
2_wt.q.05_peak_19802	chr17	27642211	27643569
2_wt.q.05_peak_12617	chr13	85310691	85311388
2_wt.q.05_peak_16463	chr15	64269640	64270428
2_wt.q.05_peak_33247	chr5	13262744	13263758
2_wt.q.05_peak_44294	chr9	57932507	57933191
2_wt.q.05_peak_967	chr1	56924814	56925173
2_wt.q.05_peak_8912	chr12	5156861	5158560
2_wt.q.05_peak_2974	chr1	170411845	170412768
2_wt.q.05_peak_42622	chr8	98861265	98861636
2_wt.q.05_peak_22704	chr18	86600690	86602263
2_wt.q.05_peak_45465	chr9	112101844	112102964
2_wt.q.05_peak_32851	chr4	140070127	140070438
2_wt.q.05_peak_5053	chr10	84963410	84963898
2_wt.q.05_peak_8040	chr11	95391696	95393074
2_wt.q.05_peak_15989	chr15	37725441	37725823
2_wt.q.05_peak_41219	chr8	17461948	17463306
2_wt.q.05_peak_29604	chr3	108388789	108389259
2_wt.q.05_peak_2657	chr1	158548714	158549968
2_wt.q.05_peak_42933	chr8	117469926	117470939
2_wt.q.05_peak_45530	chr9	112734380	112735944
2_wt.q.05_peak_10116	chr12	76282075	76282572
2_wt.q.05_peak_28485	chr3	55397082	55397727
2_wt.q.05_peak_13651	chr14	21221713	21222705
2_wt.q.05_peak_39462	chr7	74324730	74325228
2_wt.q.05_peak_21309	chr18	23436089	23437022
2_wt.q.05_peak_35963	chr6	14185668	14186891
2_wt.q.05_peak_7305	chr11	67672006	67672528
2_wt.q.05_peak_25493	chr2	71245275	71246269
2_wt.q.05_peak_1701	chr1	97960392	97961238
2_wt.q.05_peak_33390	chr5	20582490	20583269
2_wt.q.05_peak_28664	chr3	68128860	68129941
2_wt.q.05_peak_19332	chr16	97285945	97286767
2_wt.q.05_peak_43420	chr9	24283188	24285342
2_wt.q.05_peak_45302	chr9	107249648	107251548
2_wt.q.05_peak_43810	chr9	40505708	40507094
2_wt.q.05_peak_31193	chr4	47281624	47282783
2_wt.q.05_peak_9294	chr12	29822088	29823269
2_wt.q.05_peak_45165	chr9	103549487	103550119
2_wt.q.05_peak_14876	chr14	86489503	86490295
2_wt.q.05_peak_28690	chr3	68602878	68603591
2_wt.q.05_peak_3523	chr1	194675384	194676605
2_wt.q.05_peak_21272	chr18	21157670	21159615
2_wt.q.05_peak_28510	chr3	55687418	55688577
2_wt.q.05_peak_21420	chr18	29632509	29633492
2_wt.q.05_peak_4473	chr10	58381919	58384191
2_wt.q.05_peak_43878	chr9	42187055	42188002
2_wt.q.05_peak_3500	chr1	193586411	193588125
2_wt.q.05_peak_15701	chr15	25368548	25370144
2_wt.q.05_peak_13644	chr14	20970187	20971120
2_wt.q.05_peak_26080	chr2	101295852	101297142
2_wt.q.05_peak_10666	chr12	100398146	100398964
2_wt.q.05_peak_33659	chr5	32346201	32346777
2_wt.q.05_peak_39299	chr7	64583117	64584895
2_wt.q.05_peak_14349	chr14	63130066	63130492
2_wt.q.05_peak_22436	chr18	69664664	69665305
2_wt.q.05_peak_36132	chr6	27348129	27348914
2_wt.q.05_peak_10571	chr12	98046725	98047416
2_wt.q.05_peak_18287	chr16	34236322	34238223
2_wt.q.05_peak_18788	chr16	63621945	63622277
2_wt.q.05_peak_8962	chr12	7328181	7329400
2_wt.q.05_peak_11620	chr13	36493372	36494380
2_wt.q.05_peak_5706	chr10	111189888	111190473
2_wt.q.05_peak_10263	chr12	82409625	82410190
2_wt.q.05_peak_16908	chr15	79770309	79771110
2_wt.q.05_peak_40589	chr7	124934613	124935398
2_wt.q.05_peak_15034	chr14	102884920	102885489
2_wt.q.05_peak_11191	chr13	12195170	12195991
2_wt.q.05_peak_2731	chr1	160628064	160629679
2_wt.q.05_peak_13484	chr14	12450940	12451266
2_wt.q.05_peak_39485	chr7	75266968	75268178
2_wt.q.05_peak_20979	chr17	90892588	90893038
2_wt.q.05_peak_12928	chr13	98728982	98730259
2_wt.q.05_peak_10652	chr12	100336228	100336876
2_wt.q.05_peak_37808	chr6	115124399	115125485
2_wt.q.05_peak_11501	chr13	25957785	25959104
2_wt.q.05_peak_40396	chr7	117699534	117700415
2_wt.q.05_peak_18264	chr16	33464545	33465198
2_wt.q.05_peak_11529	chr13	29273828	29274451
2_wt.q.05_peak_5415	chr10	99552692	99553962
2_wt.q.05_peak_35235	chr5	124220945	124222536
2_wt.q.05_peak_39484	chr7	75264465	75265705
2_wt.q.05_peak_22164	chr18	61609587	61610548
2_wt.q.05_peak_24935	chr2	44573517	44577734
2_wt.q.05_peak_24187	chr2	8026578	8028054
2_wt.q.05_peak_14642	chr14	73198924	73199544
2_wt.q.05_peak_25008	chr2	46282953	46283441
2_wt.q.05_peak_11500	chr13	25933094	25933646
2_wt.q.05_peak_3824	chr10	17565258	17565722
2_wt.q.05_peak_28436	chr3	53379567	53380315
2_wt.q.05_peak_13744	chr14	24578739	24579634
2_wt.q.05_peak_14183	chr14	54730021	54730346
2_wt.q.05_peak_31271	chr4	53511941	53512660
2_wt.q.05_peak_40989	chr8	8233092	8233710
2_wt.q.05_peak_31801	chr4	88159256	88159774
2_wt.q.05_peak_42850	chr8	111218101	111218879
2_wt.q.05_peak_29836	chr3	123298173	123299118
2_wt.q.05_peak_44070	chr9	49621654	49622219
2_wt.q.05_peak_1706	chr1	98002612	98003560
2_wt.q.05_peak_21547	chr18	35045688	35046966
2_wt.q.05_peak_1098	chr1	63898827	63899310
2_wt.q.05_peak_14905	chr14	88800722	88801433
2_wt.q.05_peak_43128	chr8	126524366	126525420
2_wt.q.05_peak_4405	chr10	53116197	53116705
2_wt.q.05_peak_21695	chr18	39083472	39083759
2_wt.q.05_peak_31278	chr4	53749376	53750926
2_wt.q.05_peak_23614	chr19	45432122	45432878
2_wt.q.05_peak_35494	chr5	135812909	135813643
2_wt.q.05_peak_22120	chr18	60756128	60757062
2_wt.q.05_peak_33559	chr5	25801927	25803096
2_wt.q.05_peak_2261	chr1	138995436	138996355
2_wt.q.05_peak_9699	chr12	52773632	52775113
2_wt.q.05_peak_28241	chr3	37816952	37817999
2_wt.q.05_peak_30067	chr3	136450439	136452185
2_wt.q.05_peak_24906	chr2	43988375	43989003
2_wt.q.05_peak_37108	chr6	86066158	86067819
2_wt.q.05_peak_31996	chr4	102439436	102440612
2_wt.q.05_peak_17025	chr15	83840821	83841442
2_wt.q.05_peak_39942	chr7	96574928	96575439
2_wt.q.05_peak_18801	chr16	64332780	64333335
2_wt.q.05_peak_3951	chr10	22697017	22697628
2_wt.q.05_peak_19499	chr17	11076593	11077584
2_wt.q.05_peak_30869	chr4	26933638	26934560
2_wt.q.05_peak_11763	chr13	43271685	43272547
2_wt.q.05_peak_8126	chr11	97971520	97972061
2_wt.q.05_peak_27447	chr2	157803910	157805263
2_wt.q.05_peak_12647	chr13	89882683	89883217
2_wt.q.05_peak_11735	chr13	42852007	42852768
2_wt.q.05_peak_30117	chr3	137482740	137483210
2_wt.q.05_peak_9750	chr12	57949679	57950057
2_wt.q.05_peak_5054	chr10	84964161	84964579
2_wt.q.05_peak_2519	chr1	154730603	154731023
2_wt.q.05_peak_20222	chr17	50762589	50764168
2_wt.q.05_peak_1693	chr1	97827814	97828582
2_wt.q.05_peak_28729	chr3	69494560	69495620
2_wt.q.05_peak_11971	chr13	52879605	52880503
2_wt.q.05_peak_26969	chr2	136795848	136796154
2_wt.q.05_peak_36428	chr6	37243930	37245006
2_wt.q.05_peak_26717	chr2	129627005	129628511
2_wt.q.05_peak_9031	chr12	12218792	12219298
2_wt.q.05_peak_5141	chr10	90617857	90618139
2_wt.q.05_peak_28633	chr3	65442388	65443198
2_wt.q.05_peak_25251	chr2	62306489	62308245
2_wt.q.05_peak_3606	chr10	6916206	6917572
2_wt.q.05_peak_3311	chr1	183182820	183183629
2_wt.q.05_peak_915	chr1	55158552	55158989
2_wt.q.05_peak_436	chr1	32463138	32464005
2_wt.q.05_peak_38622	chr7	19169862	19170190
2_wt.q.05_peak_18846	chr16	67095511	67096619
2_wt.q.05_peak_9284	chr12	29723375	29724227
2_wt.q.05_peak_1948	chr1	127439459	127440320
2_wt.q.05_peak_24208	chr2	8498074	8499145
2_wt.q.05_peak_2253	chr1	138596560	138597079
2_wt.q.05_peak_32317	chr4	121003841	121004560
2_wt.q.05_peak_16661	chr15	71541905	71542861
2_wt.q.05_peak_41560	chr8	39123913	39125312
2_wt.q.05_peak_6451	chr11	25848765	25850244
2_wt.q.05_peak_12869	chr13	97388945	97391214
2_wt.q.05_peak_40361	chr7	116191446	116191869
2_wt.q.05_peak_9275	chr12	29654964	29656006
2_wt.q.05_peak_37054	chr6	83541836	83543006
2_wt.q.05_peak_30599	chr4	7584303	7584746
2_wt.q.05_peak_42564	chr8	94574318	94575099
2_wt.q.05_peak_30154	chr3	138771193	138771662
2_wt.q.05_peak_3099	chr1	175300356	175300954
2_wt.q.05_peak_15962	chr15	37053352	37053942
2_wt.q.05_peak_11013	chr12	119207717	119208713
2_wt.q.05_peak_38806	chr7	29490246	29490645
2_wt.q.05_peak_9857	chr12	66157460	66157923
2_wt.q.05_peak_12733	chr13	93060621	93061337
2_wt.q.05_peak_27602	chr2	166271530	166271931
2_wt.q.05_peak_15831	chr15	30708552	30709446
2_wt.q.05_peak_14504	chr14	66319008	66320380
2_wt.q.05_peak_3513	chr1	194334679	194335501
2_wt.q.05_peak_1085	chr1	63457556	63458361
2_wt.q.05_peak_11533	chr13	29550076	29551260
2_wt.q.05_peak_6187	chr11	6568559	6569540
2_wt.q.05_peak_5231	chr10	93231501	93232869
2_wt.q.05_peak_21311	chr18	23444709	23445262
2_wt.q.05_peak_44932	chr9	86976478	86976751
2_wt.q.05_peak_10185	chr12	80366136	80367100
2_wt.q.05_peak_3128	chr1	176922264	176923428
2_wt.q.05_peak_18029	chr16	22545089	22545948
2_wt.q.05_peak_7861	chr11	86851576	86853080
2_wt.q.05_peak_33010	chr4	150581665	150582904
2_wt.q.05_peak_3524	chr1	194681916	194682501
2_wt.q.05_peak_36465	chr6	38786725	38787337
2_wt.q.05_peak_4058	chr10	29179691	29181417
2_wt.q.05_peak_24054	chr2	6741360	6741998
2_wt.q.05_peak_28487	chr3	55415059	55415856
2_wt.q.05_peak_27606	chr2	166667902	166668912
2_wt.q.05_peak_30709	chr4	15012443	15012702
2_wt.q.05_peak_12380	chr13	76194509	76195043
2_wt.q.05_peak_9220	chr12	26620806	26621251
2_wt.q.05_peak_24883	chr2	43322813	43324298
2_wt.q.05_peak_39292	chr7	64451443	64452473
2_wt.q.05_peak_19536	chr17	12718090	12718519
2_wt.q.05_peak_39111	chr7	49496455	49497679
2_wt.q.05_peak_8868	chr12	3887317	3888296
2_wt.q.05_peak_23240	chr19	26381728	26382855
2_wt.q.05_peak_43006	chr8	122928995	122929736
2_wt.q.05_peak_6628	chr11	32693525	32694791
2_wt.q.05_peak_39937	chr7	96506932	96507868
2_wt.q.05_peak_9209	chr12	26226048	26226851
2_wt.q.05_peak_30871	chr4	27117422	27118659
2_wt.q.05_peak_45592	chr9	113939258	113939957
2_wt.q.05_peak_42247	chr8	79140689	79141791
2_wt.q.05_peak_8957	chr12	7197415	7198434
2_wt.q.05_peak_11755	chr13	43228080	43228963
2_wt.q.05_peak_31192	chr4	47251630	47252209
2_wt.q.05_peak_33056	chr4	152405107	152406066
2_wt.q.05_peak_34027	chr5	53243038	53243352
2_wt.q.05_peak_41808	chr8	55001726	55004074
2_wt.q.05_peak_35420	chr5	131819148	131820084
2_wt.q.05_peak_18921	chr16	72500526	72501564
2_wt.q.05_peak_2106	chr1	133226175	133227741
2_wt.q.05_peak_26102	chr2	102126582	102127750
2_wt.q.05_peak_5035	chr10	84400204	84400498
2_wt.q.05_peak_8716	chr11	117127677	117128307
2_wt.q.05_peak_43318	chr9	17392354	17393780
2_wt.q.05_peak_42728	chr8	105623480	105625559
2_wt.q.05_peak_13606	chr14	19945615	19946400
2_wt.q.05_peak_8087	chr11	97370898	97371172
2_wt.q.05_peak_4506	chr10	59334362	59335690
2_wt.q.05_peak_19765	chr17	26575675	26576282
2_wt.q.05_peak_44551	chr9	66864135	66865090
2_wt.q.05_peak_29068	chr3	85667533	85668775
2_wt.q.05_peak_6590	chr11	31940621	31940983
2_wt.q.05_peak_9617	chr12	49945192	49946633
2_wt.q.05_peak_6456	chr11	25940648	25941504
2_wt.q.05_peak_25689	chr2	79307329	79307659
2_wt.q.05_peak_42448	chr8	86437174	86438741
2_wt.q.05_peak_2725	chr1	160548132	160548899
2_wt.q.05_peak_17595	chr16	5070178	5070615
2_wt.q.05_peak_11783	chr13	43587972	43588606
2_wt.q.05_peak_34016	chr5	53147021	53148123
2_wt.q.05_peak_45303	chr9	107259106	107260582
2_wt.q.05_peak_25595	chr2	74424368	74425621
2_wt.q.05_peak_7329	chr11	68745563	68746776
2_wt.q.05_peak_43753	chr9	37623972	37626330
2_wt.q.05_peak_4057	chr10	29175934	29178782
2_wt.q.05_peak_18952	chr16	74464270	74464953
2_wt.q.05_peak_3781	chr10	14179460	14180467
2_wt.q.05_peak_31140	chr4	45471449	45472159
2_wt.q.05_peak_2529	chr1	155038356	155039547
2_wt.q.05_peak_21521	chr18	34457209	34458376
2_wt.q.05_peak_39688	chr7	84402190	84402632
2_wt.q.05_peak_33225	chr5	9662757	9664425
2_wt.q.05_peak_42163	chr8	73007779	73008954
2_wt.q.05_peak_9641	chr12	50537385	50538935
2_wt.q.05_peak_9660	chr12	51191060	51192149
2_wt.q.05_peak_16571	chr15	68535299	68535968
2_wt.q.05_peak_21153	chr18	12026055	12026549
2_wt.q.05_peak_28692	chr3	68605574	68607360
2_wt.q.05_peak_28693	chr3	68607708	68610326
2_wt.q.05_peak_25129	chr2	55227379	55228021
2_wt.q.05_peak_22529	chr18	76259177	76260451
2_wt.q.05_peak_4695	chr10	69630653	69631646
2_wt.q.05_peak_469	chr1	34183161	34183794
2_wt.q.05_peak_41662	chr8	45750963	45752800
2_wt.q.05_peak_31667	chr4	82892553	82892870
2_wt.q.05_peak_35786	chr5	149380374	149380709
2_wt.q.05_peak_6591	chr11	31941249	31941559
2_wt.q.05_peak_13038	chr13	101905542	101906518
2_wt.q.05_peak_10242	chr12	82252065	82253109
2_wt.q.05_peak_11871	chr13	46433844	46435352
2_wt.q.05_peak_7933	chr11	90175864	90176154
2_wt.q.05_peak_30557	chr4	5701039	5701723
2_wt.q.05_peak_6605	chr11	32128571	32129143
2_wt.q.05_peak_15469	chr15	8030265	8031473
2_wt.q.05_peak_2511	chr1	154661051	154662219
2_wt.q.05_peak_36069	chr6	21325038	21325426
2_wt.q.05_peak_26970	chr2	136798677	136799630
2_wt.q.05_peak_25979	chr2	92924799	92925357
2_wt.q.05_peak_10177	chr12	80014353	80015159
2_wt.q.05_peak_23179	chr19	22929604	22931961
2_wt.q.05_peak_44439	chr9	63060772	63061088
2_wt.q.05_peak_26702	chr2	129231759	129232697
2_wt.q.05_peak_36491	chr6	39626512	39627301
2_wt.q.05_peak_39845	chr7	91444028	91445037
2_wt.q.05_peak_22544	chr18	77214800	77215962
2_wt.q.05_peak_32057	chr4	104723464	104723999
2_wt.q.05_peak_17097	chr15	86487119	86487551
2_wt.q.05_peak_41557	chr8	39092225	39094130
2_wt.q.05_peak_39668	chr7	83814338	83816208
2_wt.q.05_peak_30679	chr4	13715615	13717041
2_wt.q.05_peak_26829	chr2	132291895	132292465
2_wt.q.05_peak_10500	chr12	93415699	93416334
2_wt.q.05_peak_7770	chr11	83382285	83383414
2_wt.q.05_peak_39088	chr7	49267195	49268580
2_wt.q.05_peak_2981	chr1	170548291	170550256
2_wt.q.05_peak_39173	chr7	56055164	56056264
2_wt.q.05_peak_38414	chr6	148571350	148572285
2_wt.q.05_peak_41398	chr8	28871719	28872176
2_wt.q.05_peak_10292	chr12	83169746	83170483
2_wt.q.05_peak_24385	chr2	20249142	20250059
2_wt.q.05_peak_209	chr1	20905789	20906301
2_wt.q.05_peak_22344	chr18	68049517	68050376
2_wt.q.05_peak_28701	chr3	68686709	68687334
2_wt.q.05_peak_1012	chr1	58739270	58740846
2_wt.q.05_peak_23257	chr19	26987487	26988156
2_wt.q.05_peak_43624	chr9	31176212	31177213
2_wt.q.05_peak_34300	chr5	72698802	72699674
2_wt.q.05_peak_35503	chr5	135924943	135926180
2_wt.q.05_peak_13655	chr14	21342499	21343421
2_wt.q.05_peak_28996	chr3	84938007	84938836
2_wt.q.05_peak_13225	chr13	110141228	110141518
2_wt.q.05_peak_34051	chr5	54112949	54113885
2_wt.q.05_peak_16080	chr15	40839094	40839691
2_wt.q.05_peak_45167	chr9	103594779	103595293
2_wt.q.05_peak_21330	chr18	23885084	23885526
2_wt.q.05_peak_27488	chr2	160854506	160855357
2_wt.q.05_peak_1248	chr1	72593548	72594450
2_wt.q.05_peak_39266	chr7	63585985	63587318
2_wt.q.05_peak_2530	chr1	155040437	155041247
2_wt.q.05_peak_37463	chr6	101307836	101308192
2_wt.q.05_peak_15842	chr15	31091548	31092656
2_wt.q.05_peak_24933	chr2	44564876	44566374
2_wt.q.05_peak_9372	chr12	32926682	32927017
2_wt.q.05_peak_29593	chr3	108296105	108297112
2_wt.q.05_peak_12471	chr13	81828020	81829306
2_wt.q.05_peak_35422	chr5	131825439	131826228
2_wt.q.05_peak_2799	chr1	164590341	164590778
2_wt.q.05_peak_14378	chr14	64199320	64200384
2_wt.q.05_peak_12892	chr13	97566044	97566647
2_wt.q.05_peak_21195	chr18	14654780	14655829
2_wt.q.05_peak_30115	chr3	137479731	137480417
2_wt.q.05_peak_23488	chr19	40359716	40360277
2_wt.q.05_peak_17704	chr16	9752772	9753672
2_wt.q.05_peak_37147	chr6	86996658	86997206
2_wt.q.05_peak_2972	chr1	170408306	170409840
2_wt.q.05_peak_17706	chr16	9767662	9768677
2_wt.q.05_peak_23030	chr19	12475310	12476541
2_wt.q.05_peak_36256	chr6	31114006	31117740
2_wt.q.05_peak_3764	chr10	14059004	14059427
2_wt.q.05_peak_5536	chr10	108580919	108582093
2_wt.q.05_peak_9300	chr12	29883963	29885136
2_wt.q.05_peak_21565	chr18	35439927	35440240
2_wt.q.05_peak_39361	chr7	66867252	66868249
2_wt.q.05_peak_12381	chr13	76258331	76259593
2_wt.q.05_peak_34351	chr5	74051315	74052120
2_wt.q.05_peak_16462	chr15	64234152	64235033
2_wt.q.05_peak_4718	chr10	69858617	69860216
2_wt.q.05_peak_22116	chr18	60715286	60715811
2_wt.q.05_peak_439	chr1	32632683	32633969
2_wt.q.05_peak_24876	chr2	43004365	43004699
2_wt.q.05_peak_22872	chr19	6521945	6522880
2_wt.q.05_peak_15703	chr15	25376448	25379174
2_wt.q.05_peak_37509	chr6	102556065	102557617
2_wt.q.05_peak_2975	chr1	170440063	170441234
2_wt.q.05_peak_41643	chr8	45558280	45560297
2_wt.q.05_peak_39945	chr7	96707892	96708944
2_wt.q.05_peak_9735	chr12	55463451	55464578
2_wt.q.05_peak_39162	chr7	55849820	55850859
2_wt.q.05_peak_20560	chr17	70597861	70599339
2_wt.q.05_peak_237	chr1	21804581	21805417
2_wt.q.05_peak_36918	chr6	71803906	71805071
2_wt.q.05_peak_14394	chr14	64309306	64314101
2_wt.q.05_peak_26090	chr2	101983250	101984623
2_wt.q.05_peak_35258	chr5	124452344	124453172
2_wt.q.05_peak_36276	chr6	31189296	31191773
2_wt.q.05_peak_30962	chr4	33735280	33736517
2_wt.q.05_peak_24900	chr2	43948301	43950338
2_wt.q.05_peak_28476	chr3	55315204	55316721
2_wt.q.05_peak_22345	chr18	68051501	68051787
2_wt.q.05_peak_20873	chr17	87369035	87370088
2_wt.q.05_peak_31239	chr4	49914025	49915238
2_wt.q.05_peak_28084	chr3	28522874	28525073
2_wt.q.05_peak_37792	chr6	114889203	114889566
2_wt.q.05_peak_21813	chr18	42823149	42823601
2_wt.q.05_peak_2240	chr1	137921064	137923494
2_wt.q.05_peak_3070	chr1	173357065	173358409
2_wt.q.05_peak_38110	chr6	134171831	134172368
2_wt.q.05_peak_25053	chr2	49695126	49695915
2_wt.q.05_peak_45428	chr9	111182518	111183550
2_wt.q.05_peak_32818	chr4	138693320	138693880
2_wt.q.05_peak_37794	chr6	114892296	114892564
2_wt.q.05_peak_26387	chr2	115922241	115923193
2_wt.q.05_peak_24960	chr2	45032210	45033513
2_wt.q.05_peak_28349	chr3	48579058	48579991
2_wt.q.05_peak_3929	chr10	21605014	21606237
2_wt.q.05_peak_26160	chr2	103668521	103669295
2_wt.q.05_peak_27182	chr2	146290778	146291311
2_wt.q.05_peak_41810	chr8	55012170	55012567
2_wt.q.05_peak_5901	chr10	122806765	122808666
2_wt.q.05_peak_40801	chr7	134774075	134774588
2_wt.q.05_peak_6529	chr11	29788648	29789281
2_wt.q.05_peak_3762	chr10	14055126	14056010
2_wt.q.05_peak_17066	chr15	85461854	85463210
2_wt.q.05_peak_18209	chr16	31897816	31899916
2_wt.q.05_peak_11588	chr13	34313302	34313778
2_wt.q.05_peak_34458	chr5	82441027	82441393
2_wt.q.05_peak_12086	chr13	57937713	57938213
2_wt.q.05_peak_7865	chr11	86944252	86945365
2_wt.q.05_peak_1360	chr1	78371132	78372254
2_wt.q.05_peak_17524	chr15	102635341	102635842
2_wt.q.05_peak_37105	chr6	86059330	86060566
2_wt.q.05_peak_23241	chr19	26383524	26384470
2_wt.q.05_peak_43845	chr9	41448693	41449507
2_wt.q.05_peak_23996	chr2	5369250	5370359
2_wt.q.05_peak_37071	chr6	84465820	84466586
2_wt.q.05_peak_12478	chr13	81909758	81910747
2_wt.q.05_peak_3153	chr1	177125891	177127230
2_wt.q.05_peak_2687	chr1	159664246	159665444
2_wt.q.05_peak_38323	chr6	143853627	143854600
2_wt.q.05_peak_10524	chr12	95387733	95388862
2_wt.q.05_peak_34018	chr5	53155651	53156882
2_wt.q.05_peak_42757	chr8	106321195	106322577
2_wt.q.05_peak_19393	chr17	5202140	5202448
2_wt.q.05_peak_22393	chr18	69432758	69433442
2_wt.q.05_peak_36655	chr6	50413558	50414122
2_wt.q.05_peak_43502	chr9	27175120	27175623
2_wt.q.05_peak_2077	chr1	132623589	132624103
2_wt.q.05_peak_9358	chr12	31965820	31966626
2_wt.q.05_peak_1568	chr1	89092497	89093220
2_wt.q.05_peak_26076	chr2	101173051	101173350
2_wt.q.05_peak_16552	chr15	67950500	67951087
2_wt.q.05_peak_22229	chr18	64944105	64945576
2_wt.q.05_peak_41609	chr8	41713446	41714520
2_wt.q.05_peak_45359	chr9	108440705	108442109
2_wt.q.05_peak_40075	chr7	100816160	100816931
2_wt.q.05_peak_46387	chrX	166807958	166809261
2_wt.q.05_peak_13481	chr14	12436707	12438465
2_wt.q.05_peak_23132	chr19	20559593	20560178
2_wt.q.05_peak_7330	chr11	68747448	68748753
2_wt.q.05_peak_7787	chr11	84043344	84043665
2_wt.q.05_peak_2549	chr1	155306884	155307481
2_wt.q.05_peak_35172	chr5	122971044	122972512
2_wt.q.05_peak_25104	chr2	52942502	52942995
2_wt.q.05_peak_1463	chr1	84086720	84087448
2_wt.q.05_peak_40308	chr7	113246334	113247817
2_wt.q.05_peak_9127	chr12	17060852	17061713
2_wt.q.05_peak_5620	chr10	109360244	109360736
2_wt.q.05_peak_15351	chr14	121165436	121166136
2_wt.q.05_peak_39298	chr7	64576444	64577310
2_wt.q.05_peak_2651	chr1	158407951	158409010
2_wt.q.05_peak_22334	chr18	67984639	67985509
2_wt.q.05_peak_42079	chr8	70200501	70200937
2_wt.q.05_peak_31632	chr4	82297392	82299795
2_wt.q.05_peak_33086	chr4	155129799	155130088
2_wt.q.05_peak_10911	chr12	111829076	111830111
2_wt.q.05_peak_45546	chr9	113177156	113178143
2_wt.q.05_peak_17610	chr16	6042258	6043335
2_wt.q.05_peak_45822	chrX	10450444	10450816
2_wt.q.05_peak_36022	chr6	17923643	17924972
2_wt.q.05_peak_20246	chr17	53587131	53587955
2_wt.q.05_peak_39963	chr7	97386333	97386972
2_wt.q.05_peak_4024	chr10	27631031	27631638
2_wt.q.05_peak_39416	chr7	68905487	68906996
2_wt.q.05_peak_6674	chr11	36484898	36485461
2_wt.q.05_peak_8192	chr11	98954901	98955230
2_wt.q.05_peak_30784	chr4	20518074	20519095
2_wt.q.05_peak_19876	chr17	30469192	30470776
2_wt.q.05_peak_28900	chr3	80772940	80774323
2_wt.q.05_peak_963	chr1	56899415	56901300
2_wt.q.05_peak_9565	chr12	45012830	45013850
2_wt.q.05_peak_34050	chr5	54100661	54101708
2_wt.q.05_peak_15571	chr15	12907256	12908797
2_wt.q.05_peak_20405	chr17	64750983	64754614
2_wt.q.05_peak_25490	chr2	71019227	71020745
2_wt.q.05_peak_6602	chr11	32087149	32087851
2_wt.q.05_peak_32280	chr4	119761121	119762634
2_wt.q.05_peak_37609	chr6	108235604	108236919
2_wt.q.05_peak_43155	chr8	128003871	128004248
2_wt.q.05_peak_3783	chr10	14195337	14197392
2_wt.q.05_peak_24952	chr2	44999641	45001414
2_wt.q.05_peak_28982	chr3	84246067	84247762
2_wt.q.05_peak_5142	chr10	90627725	90628001
2_wt.q.05_peak_30785	chr4	20639899	20640689
2_wt.q.05_peak_17103	chr15	87668322	87668586
2_wt.q.05_peak_42488	chr8	90324498	90325274
2_wt.q.05_peak_18824	chr16	65406587	65407186
2_wt.q.05_peak_25105	chr2	52943591	52944417
2_wt.q.05_peak_22504	chr18	74890111	74890939
2_wt.q.05_peak_38611	chr7	18941852	18942493
2_wt.q.05_peak_30399	chr3	153395321	153396729
2_wt.q.05_peak_18255	chr16	33344120	33344943
2_wt.q.05_peak_20067	chr17	43032287	43033269
2_wt.q.05_peak_24697	chr2	33272598	33273763
2_wt.q.05_peak_41171	chr8	16115156	16116136
2_wt.q.05_peak_25130	chr2	55231170	55231509
2_wt.q.05_peak_20795	chr17	83782414	83783296
2_wt.q.05_peak_39840	chr7	91429557	91430124
2_wt.q.05_peak_8514	chr11	108145145	108146866
2_wt.q.05_peak_25177	chr2	58432061	58432889
2_wt.q.05_peak_2787	chr1	164394899	164396221
2_wt.q.05_peak_19168	chr16	90352483	90353277
2_wt.q.05_peak_30405	chr3	153492976	153493739
2_wt.q.05_peak_25999	chr2	94121918	94124181
2_wt.q.05_peak_11878	chr13	46523087	46524055
2_wt.q.05_peak_45301	chr9	107248288	107249212
2_wt.q.05_peak_42288	chr8	83011435	83012033
2_wt.q.05_peak_4608	chr10	65118049	65118935
2_wt.q.05_peak_25874	chr2	90955120	90957365
2_wt.q.05_peak_13922	chr14	32003248	32004026
2_wt.q.05_peak_13044	chr13	102342788	102344251
2_wt.q.05_peak_1367	chr1	78747031	78747544
2_wt.q.05_peak_35426	chr5	132028969	132030134
2_wt.q.05_peak_1333	chr1	77109771	77110641
2_wt.q.05_peak_36175	chr6	28753438	28754133
2_wt.q.05_peak_34019	chr5	53162352	53162822
2_wt.q.05_peak_19317	chr16	96632998	96635258
2_wt.q.05_peak_4762	chr10	71272614	71273403
2_wt.q.05_peak_25255	chr2	62334219	62334913
2_wt.q.05_peak_9346	chr12	31754181	31757030
2_wt.q.05_peak_2904	chr1	168375284	168375675
2_wt.q.05_peak_17776	chr16	12119032	12119617
2_wt.q.05_peak_23490	chr19	40371258	40372695
2_wt.q.05_peak_43400	chr9	23495145	23496676
2_wt.q.05_peak_4701	chr10	69690570	69691125
2_wt.q.05_peak_46372	chrX	166323226	166323705
2_wt.q.05_peak_34042	chr5	53947132	53947974
2_wt.q.05_peak_10728	chr12	102250404	102252583
2_wt.q.05_peak_12558	chr13	83662039	83662370
2_wt.q.05_peak_12556	chr13	83651746	83653819
2_wt.q.05_peak_41916	chr8	64654670	64656083
2_wt.q.05_peak_41533	chr8	36924591	36925604
2_wt.q.05_peak_19325	chr16	97001583	97003000
2_wt.q.05_peak_44722	chr9	75242894	75244010
2_wt.q.05_peak_8968	chr12	8357080	8357912
2_wt.q.05_peak_12723	chr13	92999377	93001685
2_wt.q.05_peak_819	chr1	51906328	51907439
2_wt.q.05_peak_27682	chr2	170739843	170740207
2_wt.q.05_peak_39949	chr7	96789940	96790881
2_wt.q.05_peak_37689	chr6	111371429	111373840
2_wt.q.05_peak_9085	chr12	14871335	14871866
2_wt.q.05_peak_6595	chr11	32008491	32009186
2_wt.q.05_peak_12508	chr13	82971423	82972087
2_wt.q.05_peak_15122	chr14	105717796	105719497
2_wt.q.05_peak_17088	chr15	86109901	86110160
2_wt.q.05_peak_27538	chr2	163718266	163719695
2_wt.q.05_peak_20197	chr17	49219637	49220002
2_wt.q.05_peak_12432	chr13	78577318	78578033
2_wt.q.05_peak_30957	chr4	33520593	33521517
2_wt.q.05_peak_31365	chr4	59868110	59868537
2_wt.q.05_peak_32474	chr4	127640566	127640879
2_wt.q.05_peak_23749	chr19	50520809	50521166
2_wt.q.05_peak_40613	chr7	126288014	126288696
2_wt.q.05_peak_19207	chr16	91906348	91907491
2_wt.q.05_peak_22308	chr18	67497898	67498656
2_wt.q.05_peak_42050	chr8	69148916	69149939
2_wt.q.05_peak_17614	chr16	6113357	6113887
2_wt.q.05_peak_40309	chr7	113249351	113250380
2_wt.q.05_peak_13111	chr13	105016678	105017040
2_wt.q.05_peak_24320	chr2	17559390	17560957
2_wt.q.05_peak_14792	chr14	77580203	77581816
2_wt.q.05_peak_25978	chr2	92920460	92921058
2_wt.q.05_peak_517	chr1	36920359	36921181
2_wt.q.05_peak_36656	chr6	50414699	50415053
2_wt.q.05_peak_26116	chr2	102316258	102317555
2_wt.q.05_peak_18269	chr16	33699914	33700290
2_wt.q.05_peak_36273	chr6	31175778	31178216
2_wt.q.05_peak_29745	chr3	118441591	118443097
2_wt.q.05_peak_32992	chr4	150396132	150397495
2_wt.q.05_peak_8272	chr11	101687150	101688677
2_wt.q.05_peak_39817	chr7	91207376	91209906
2_wt.q.05_peak_39632	chr7	81840812	81841381
2_wt.q.05_peak_20230	chr17	51789060	51790484
2_wt.q.05_peak_5791	chr10	116402119	116405831
2_wt.q.05_peak_24188	chr2	8028726	8030164
2_wt.q.05_peak_3832	chr10	17844500	17845511
2_wt.q.05_peak_10489	chr12	92151383	92152374
2_wt.q.05_peak_22534	chr18	77114235	77115324
2_wt.q.05_peak_22574	chr18	78350372	78351223
2_wt.q.05_peak_5944	chr10	125121704	125122596
2_wt.q.05_peak_28877	chr3	80334347	80335150
2_wt.q.05_peak_8763	chr11	118895784	118896767
2_wt.q.05_peak_6923	chr11	50049875	50050158
2_wt.q.05_peak_23734	chr19	49359499	49359982
2_wt.q.05_peak_36546	chr6	41775392	41777260
2_wt.q.05_peak_15192	chr14	113012560	113012820
2_wt.q.05_peak_29423	chr3	101047177	101048459
2_wt.q.05_peak_21133	chr18	10734724	10735875
2_wt.q.05_peak_27296	chr2	153045215	153045996
2_wt.q.05_peak_9567	chr12	45056136	45057024
2_wt.q.05_peak_41095	chr8	13605446	13606859
2_wt.q.05_peak_44110	chr9	51305383	51305723
2_wt.q.05_peak_36114	chr6	24648787	24649903
2_wt.q.05_peak_28883	chr3	80540252	80542273
2_wt.q.05_peak_31911	chr4	97949852	97951018
2_wt.q.05_peak_24902	chr2	43951622	43952075
2_wt.q.05_peak_45159	chr9	103146181	103147416
2_wt.q.05_peak_28689	chr3	68601624	68602046
2_wt.q.05_peak_44313	chr9	58441623	58442983
2_wt.q.05_peak_37260	chr6	91488332	91489590
2_wt.q.05_peak_9219	chr12	26577186	26578013
2_wt.q.05_peak_30121	chr3	137560434	137562466
2_wt.q.05_peak_9245	chr12	28775795	28776133
2_wt.q.05_peak_45455	chr9	111475141	111475841
2_wt.q.05_peak_18334	chr16	34563520	34564629
2_wt.q.05_peak_34083	chr5	57847721	57849132
2_wt.q.05_peak_41971	chr8	66779196	66780399
2_wt.q.05_peak_37338	chr6	93856061	93856914
2_wt.q.05_peak_21905	chr18	47318334	47318650
2_wt.q.05_peak_21821	chr18	42983101	42984396
2_wt.q.05_peak_38780	chr7	28943184	28943890
2_wt.q.05_peak_19428	chr17	6005596	6006801
2_wt.q.05_peak_19261	chr16	94651988	94652844
2_wt.q.05_peak_15611	chr15	18079403	18080218
2_wt.q.05_peak_3502	chr1	193670858	193671453
2_wt.q.05_peak_3069	chr1	173355034	173355921
2_wt.q.05_peak_12909	chr13	97900044	97900409
2_wt.q.05_peak_2656	chr1	158547058	158548410
2_wt.q.05_peak_5692	chr10	110939099	110939631
2_wt.q.05_peak_32102	chr4	107717958	107718739
2_wt.q.05_peak_16907	chr15	79766729	79767451
2_wt.q.05_peak_8046	chr11	95475967	95477022
2_wt.q.05_peak_44700	chr9	75085913	75086447
2_wt.q.05_peak_9661	chr12	51241062	51244002
2_wt.q.05_peak_29861	chr3	124075225	124076834
2_wt.q.05_peak_5234	chr10	93248360	93249851
2_wt.q.05_peak_34950	chr5	113716204	113717096
2_wt.q.05_peak_12070	chr13	56698185	56698956
2_wt.q.05_peak_5906	chr10	122930956	122931627
2_wt.q.05_peak_22040	chr18	57200504	57200925
2_wt.q.05_peak_38172	chr6	135859434	135860319
2_wt.q.05_peak_42915	chr8	116618279	116618887
2_wt.q.05_peak_29486	chr3	104383626	104384326
2_wt.q.05_peak_16403	chr15	59480190	59481637
2_wt.q.05_peak_16420	chr15	60310237	60310501
2_wt.q.05_peak_1158	chr1	66186438	66188071
2_wt.q.05_peak_13011	chr13	101214747	101215561
2_wt.q.05_peak_23733	chr19	48834330	48834754
2_wt.q.05_peak_34659	chr5	99214268	99214826
2_wt.q.05_peak_45184	chr9	104180113	104180824
2_wt.q.05_peak_27974	chr3	20821506	20823512
2_wt.q.05_peak_700	chr1	43487086	43487680
2_wt.q.05_peak_36115	chr6	24650598	24651847
2_wt.q.05_peak_40258	chr7	112123029	112124940
2_wt.q.05_peak_39930	chr7	96370233	96370598
2_wt.q.05_peak_31735	chr4	85841937	85842360
2_wt.q.05_peak_38327	chr6	143968315	143969815
2_wt.q.05_peak_9858	chr12	66556151	66557018
2_wt.q.05_peak_29524	chr3	106957036	106958755
2_wt.q.05_peak_20413	chr17	65170505	65171124
2_wt.q.05_peak_25528	chr2	72108061	72108979
2_wt.q.05_peak_14345	chr14	62879420	62880350
2_wt.q.05_peak_43192	chr9	4514218	4514555
2_wt.q.05_peak_28869	chr3	80204317	80206510
2_wt.q.05_peak_13491	chr14	12573988	12574996
2_wt.q.05_peak_848	chr1	52464816	52466018
2_wt.q.05_peak_1811	chr1	107914393	107914691
2_wt.q.05_peak_15355	chr14	121200340	121200861
2_wt.q.05_peak_45566	chr9	113507073	113510029
2_wt.q.05_peak_34727	chr5	103022670	103023254
2_wt.q.05_peak_17912	chr16	18143988	18144745
2_wt.q.05_peak_20757	chr17	81471380	81472283
2_wt.q.05_peak_9128	chr12	17069519	17070417
2_wt.q.05_peak_5034	chr10	84392959	84393675
2_wt.q.05_peak_44305	chr9	58174729	58176628
2_wt.q.05_peak_327	chr1	25079164	25080027
2_wt.q.05_peak_26192	chr2	104355869	104356872
2_wt.q.05_peak_757	chr1	47102671	47103556
2_wt.q.05_peak_1676	chr1	97623955	97624988
2_wt.q.05_peak_20779	chr17	82930551	82932298
2_wt.q.05_peak_5407	chr10	99476211	99476982
2_wt.q.05_peak_28092	chr3	28638611	28639610
2_wt.q.05_peak_4816	chr10	75743648	75744162
2_wt.q.05_peak_12725	chr13	93003531	93004751
2_wt.q.05_peak_2710	chr1	160278388	160279267
2_wt.q.05_peak_1598	chr1	91204039	91205236
2_wt.q.05_peak_8709	chr11	117103948	117104455
2_wt.q.05_peak_17913	chr16	18172976	18173994
2_wt.q.05_peak_11740	chr13	42995956	42996809
2_wt.q.05_peak_21317	chr18	23571792	23572604
2_wt.q.05_peak_21249	chr18	19549731	19551616
2_wt.q.05_peak_23270	chr19	27509880	27510816
2_wt.q.05_peak_5119	chr10	89996863	89997323
2_wt.q.05_peak_31631	chr4	82293964	82294873
2_wt.q.05_peak_44069	chr9	49618445	49619487
2_wt.q.05_peak_36171	chr6	28706184	28706490
2_wt.q.05_peak_11761	chr13	43263537	43264252
2_wt.q.05_peak_22438	chr18	69673962	69675444
2_wt.q.05_peak_43231	chr9	9100493	9100846
2_wt.q.05_peak_31721	chr4	85324716	85326850
2_wt.q.05_peak_44460	chr9	64231124	64233076
2_wt.q.05_peak_1174	chr1	66364881	66366007
2_wt.q.05_peak_972	chr1	56951480	56952329
2_wt.q.05_peak_8866	chr12	3871482	3871880
2_wt.q.05_peak_4393	chr10	52777842	52778572
2_wt.q.05_peak_33370	chr5	20329779	20330764
2_wt.q.05_peak_31640	chr4	82403745	82404231
2_wt.q.05_peak_22899	chr19	7291990	7293247
2_wt.q.05_peak_33098	chr4	155296201	155296551
2_wt.q.05_peak_3497	chr1	193449417	193449978
2_wt.q.05_peak_24156	chr2	7426272	7427317
2_wt.q.05_peak_16519	chr15	66485790	66486512
2_wt.q.05_peak_11877	chr13	46516975	46517651
2_wt.q.05_peak_4500	chr10	59133474	59133821
2_wt.q.05_peak_37806	chr6	115122147	115122784
2_wt.q.05_peak_5206	chr10	91887612	91888969
2_wt.q.05_peak_34605	chr5	96454720	96456419
2_wt.q.05_peak_15501	chr15	10750048	10751210
2_wt.q.05_peak_674	chr1	42773790	42774066
2_wt.q.05_peak_9643	chr12	50597865	50598697
2_wt.q.05_peak_12591	chr13	84631978	84633317
2_wt.q.05_peak_91	chr1	10596394	10596837
2_wt.q.05_peak_20851	chr17	86415945	86416697
2_wt.q.05_peak_18745	chr16	59547138	59548137
2_wt.q.05_peak_28872	chr3	80248173	80249204
2_wt.q.05_peak_12724	chr13	93002126	93002385
2_wt.q.05_peak_33223	chr5	9624267	9624552
2_wt.q.05_peak_9287	chr12	29755064	29756096
2_wt.q.05_peak_39110	chr7	49494146	49495371
2_wt.q.05_peak_16531	chr15	66824268	66825450
2_wt.q.05_peak_2175	chr1	135566855	135567504
2_wt.q.05_peak_3503	chr1	193673481	193673910
2_wt.q.05_peak_22462	chr18	71361738	71362216
2_wt.q.05_peak_39662	chr7	83380619	83382620
2_wt.q.05_peak_15625	chr15	18925346	18926519
2_wt.q.05_peak_10609	chr12	98960907	98961849
2_wt.q.05_peak_20837	chr17	86249883	86250685
2_wt.q.05_peak_9351	chr12	31826205	31827206
2_wt.q.05_peak_24246	chr2	12293736	12295489
2_wt.q.05_peak_5559	chr10	108696903	108697229
2_wt.q.05_peak_43518	chr9	27437633	27438162
2_wt.q.05_peak_37489	chr6	101550347	101551044
2_wt.q.05_peak_9250	chr12	28874573	28875803
2_wt.q.05_peak_28709	chr3	68940099	68940959
2_wt.q.05_peak_36971	chr6	76984663	76985346
2_wt.q.05_peak_16681	chr15	72851509	72851841
2_wt.q.05_peak_43415	chr9	24189585	24190430
2_wt.q.05_peak_16049	chr15	39770675	39770953
2_wt.q.05_peak_3188	chr1	177573097	177574831
2_wt.q.05_peak_33789	chr5	36944954	36945517
2_wt.q.05_peak_985	chr1	57388061	57389975
2_wt.q.05_peak_14641	chr14	73173964	73174920
2_wt.q.05_peak_25344	chr2	65826455	65827066
2_wt.q.05_peak_4440	chr10	56058765	56059391
2_wt.q.05_peak_27381	chr2	156233286	156234144
2_wt.q.05_peak_8481	chr11	106815271	106816361
2_wt.q.05_peak_14692	chr14	74659376	74659911
2_wt.q.05_peak_35166	chr5	122798821	122800100
2_wt.q.05_peak_30197	chr3	141251295	141252234
2_wt.q.05_peak_16671	chr15	71810038	71810652
2_wt.q.05_peak_17609	chr16	6036416	6038031
2_wt.q.05_peak_39309	chr7	64741075	64742290
2_wt.q.05_peak_12431	chr13	78575332	78576217
2_wt.q.05_peak_12828	chr13	95871567	95872268
2_wt.q.05_peak_24111	chr2	7067480	7068617
2_wt.q.05_peak_14826	chr14	78941442	78942524
2_wt.q.05_peak_41060	chr8	11414235	11415235
2_wt.q.05_peak_2624	chr1	157517127	157519494
2_wt.q.05_peak_21877	chr18	45995926	45997830
2_wt.q.05_peak_31901	chr4	97832105	97832862
2_wt.q.05_peak_41163	chr8	15949520	15949904
2_wt.q.05_peak_28488	chr3	55423940	55425522
2_wt.q.05_peak_14344	chr14	62850525	62851533
2_wt.q.05_peak_5928	chr10	123426937	123427612
2_wt.q.05_peak_8924	chr12	5273542	5274627
2_wt.q.05_peak_45522	chr9	112444474	112444806
2_wt.q.05_peak_16515	chr15	66314044	66314778
2_wt.q.05_peak_3765	chr10	14059921	14061000
2_wt.q.05_peak_39280	chr7	63924329	63926467
2_wt.q.05_peak_22653	chr18	83765220	83765512
2_wt.q.05_peak_22465	chr18	72198391	72198998
2_wt.q.05_peak_25151	chr2	55817693	55818086
2_wt.q.05_peak_10664	chr12	100392055	100393183
2_wt.q.05_peak_31722	chr4	85334391	85335418
2_wt.q.05_peak_11586	chr13	34289378	34290254
2_wt.q.05_peak_9711	chr12	53826098	53826791
2_wt.q.05_peak_9347	chr12	31773253	31774533
2_wt.q.05_peak_44643	chr9	72021468	72021968
2_wt.q.05_peak_44864	chr9	83597442	83598423
2_wt.q.05_peak_44771	chr9	77277830	77278664
2_wt.q.05_peak_44563	chr9	67035768	67037020
2_wt.q.05_peak_14377	chr14	64182029	64184365
2_wt.q.05_peak_36479	chr6	39319321	39319609
2_wt.q.05_peak_33276	chr5	14700605	14702200
2_wt.q.05_peak_28823	chr3	79248764	79250732
2_wt.q.05_peak_135	chr1	13196543	13197783
2_wt.q.05_peak_45821	chrX	10449690	10450096
2_wt.q.05_peak_704	chr1	43531037	43531908
2_wt.q.05_peak_7659	chr11	78792168	78793773
2_wt.q.05_peak_8273	chr11	101689060	101690736
2_wt.q.05_peak_17176	chr15	91376727	91377707
2_wt.q.05_peak_3120	chr1	176800408	176802052
2_wt.q.05_peak_23470	chr19	37991209	37992331
2_wt.q.05_peak_33414	chr5	20919481	20920525
2_wt.q.05_peak_10388	chr12	86807185	86807578
2_wt.q.05_peak_24064	chr2	6795242	6796190
2_wt.q.05_peak_25117	chr2	53714956	53715822
2_wt.q.05_peak_37610	chr6	108237386	108237749
2_wt.q.05_peak_3607	chr10	6926399	6926918
2_wt.q.05_peak_34288	chr5	71976483	71976915
2_wt.q.05_peak_34188	chr5	66412414	66413614
2_wt.q.05_peak_35992	chr6	17150757	17151965
2_wt.q.05_peak_6711	chr11	40782887	40785120
2_wt.q.05_peak_21405	chr18	26957155	26958265
2_wt.q.05_peak_21331	chr18	23886730	23887438
2_wt.q.05_peak_29066	chr3	85662048	85662841
2_wt.q.05_peak_28738	chr3	70223252	70223817
2_wt.q.05_peak_3525	chr1	194685719	194686688
2_wt.q.05_peak_25680	chr2	78885939	78886545
2_wt.q.05_peak_14761	chr14	76818840	76820119
2_wt.q.05_peak_36012	chr6	17763542	17765010
2_wt.q.05_peak_36397	chr6	36726004	36727089
2_wt.q.05_peak_19554	chr17	13676764	13677954
2_wt.q.05_peak_45785	chr9	123384049	123385408
2_wt.q.05_peak_24561	chr2	29647663	29648320
2_wt.q.05_peak_22437	chr18	69665692	69668473
2_wt.q.05_peak_22358	chr18	68194198	68194512
2_wt.q.05_peak_43870	chr9	42101347	42101935
2_wt.q.05_peak_6619	chr11	32517106	32518090
2_wt.q.05_peak_43153	chr8	127774392	127775093
2_wt.q.05_peak_19527	chr17	12221664	12222185
2_wt.q.05_peak_24908	chr2	44013034	44013976
2_wt.q.05_peak_4348	chr10	46045532	46046274
2_wt.q.05_peak_2524	chr1	154791360	154792555
2_wt.q.05_peak_19875	chr17	30467396	30468464
2_wt.q.05_peak_36959	chr6	73644807	73645514
2_wt.q.05_peak_5036	chr10	84401399	84402269
2_wt.q.05_peak_12646	chr13	89881307	89882080
2_wt.q.05_peak_9256	chr12	29143041	29143802
2_wt.q.05_peak_37154	chr6	87257346	87258206
2_wt.q.05_peak_30270	chr3	144478135	144478771
2_wt.q.05_peak_1194	chr1	66654766	66655833
2_wt.q.05_peak_22997	chr19	10809217	10810511
2_wt.q.05_peak_37766	chr6	113850035	113850593
2_wt.q.05_peak_27334	chr2	154583827	154584458
2_wt.q.05_peak_11245	chr13	15641458	15642205
2_wt.q.05_peak_12449	chr13	80709628	80710644
2_wt.q.05_peak_34217	chr5	67824134	67825235
2_wt.q.05_peak_12942	chr13	98907235	98909065
2_wt.q.05_peak_25196	chr2	59178159	59179639
2_wt.q.05_peak_39746	chr7	89499349	89500658
2_wt.q.05_peak_33297	chr5	16134085	16134730
2_wt.q.05_peak_28502	chr3	55522188	55522503
2_wt.q.05_peak_19400	chr17	5286979	5287873
2_wt.q.05_peak_39928	chr7	96230042	96230847
2_wt.q.05_peak_25532	chr2	72206384	72207064
2_wt.q.05_peak_30549	chr4	5206420	5206694
2_wt.q.05_peak_30387	chr3	152758124	152758440
2_wt.q.05_peak_15500	chr15	10747894	10748610
2_wt.q.05_peak_43701	chr9	36882970	36883709
2_wt.q.05_peak_25811	chr2	84831843	84832584
2_wt.q.05_peak_13288	chr13	112722080	112722370
2_wt.q.05_peak_569	chr1	38392900	38393741
2_wt.q.05_peak_5962	chr10	126935754	126936560
2_wt.q.05_peak_22004	chr18	54545371	54546169
2_wt.q.05_peak_34872	chr5	110562445	110563479
2_wt.q.05_peak_29247	chr3	95027193	95028166
2_wt.q.05_peak_29485	chr3	104349165	104349747
2_wt.q.05_peak_39950	chr7	96816939	96817394
2_wt.q.05_peak_31889	chr4	96968819	96969450
2_wt.q.05_peak_30147	chr3	138546309	138547517
2_wt.q.05_peak_11648	chr13	37388447	37389557
2_wt.q.05_peak_14990	chr14	99733924	99734307
2_wt.q.05_peak_20759	chr17	81502368	81503719
2_wt.q.05_peak_1161	chr1	66196321	66197323
2_wt.q.05_peak_37961	chr6	120858047	120858569
2_wt.q.05_peak_40342	chr7	114058464	114059153
2_wt.q.05_peak_28739	chr3	70224383	70224833
2_wt.q.05_peak_12590	chr13	84630511	84630797
2_wt.q.05_peak_34568	chr5	92368777	92369265
2_wt.q.05_peak_31753	chr4	87041242	87042261
2_wt.q.05_peak_36859	chr6	65644197	65644961
2_wt.q.05_peak_46154	chrX	103565318	103565871
2_wt.q.05_peak_11944	chr13	51617057	51617993
2_wt.q.05_peak_43232	chr9	9101963	9102707
2_wt.q.05_peak_5574	chr10	108762498	108764018
2_wt.q.05_peak_36516	chr6	40392744	40393808
2_wt.q.05_peak_4327	chr10	43279804	43280611
2_wt.q.05_peak_35777	chr5	148965064	148967279
2_wt.q.05_peak_38405	chr6	148259654	148260853
2_wt.q.05_peak_26514	chr2	119814742	119815546
2_wt.q.05_peak_26054	chr2	97608382	97609043
2_wt.q.05_peak_34204	chr5	66979785	66981222
2_wt.q.05_peak_34153	chr5	64365101	64367767
2_wt.q.05_peak_33153	chr5	4990590	4991849
2_wt.q.05_peak_34933	chr5	113035138	113035840
2_wt.q.05_peak_29564	chr3	107793682	107794012
2_wt.q.05_peak_7572	chr11	76911257	76912419
2_wt.q.05_peak_37083	chr6	85276069	85277002
2_wt.q.05_peak_37319	chr6	92727286	92727983
2_wt.q.05_peak_9308	chr12	30020680	30021143
2_wt.q.05_peak_24206	chr2	8470035	8471750
2_wt.q.05_peak_41488	chr8	35608125	35608610
2_wt.q.05_peak_6105	chr11	4497161	4497980
2_wt.q.05_peak_699	chr1	43469235	43469734
2_wt.q.05_peak_7171	chr11	60397082	60397756
2_wt.q.05_peak_21477	chr18	32955810	32956481
2_wt.q.05_peak_26810	chr2	131996016	131996434
2_wt.q.05_peak_8417	chr11	105507636	105509420
2_wt.q.05_peak_26101	chr2	102118799	102119482
2_wt.q.05_peak_36506	chr6	39903469	39904552
2_wt.q.05_peak_39590	chr7	80655104	80655946
2_wt.q.05_peak_24941	chr2	44705879	44706457
2_wt.q.05_peak_783	chr1	50940141	50941354
2_wt.q.05_peak_3149	chr1	177051739	177052573
2_wt.q.05_peak_38413	chr6	148555864	148556896
2_wt.q.05_peak_3172	chr1	177377982	177378529
2_wt.q.05_peak_27062	chr2	142400641	142401019
2_wt.q.05_peak_16003	chr15	38011930	38012973
2_wt.q.05_peak_13020	chr13	101450192	101451277
2_wt.q.05_peak_40390	chr7	117491501	117492346
2_wt.q.05_peak_36728	chr6	54811903	54812384
2_wt.q.05_peak_3499	chr1	193575813	193576572
2_wt.q.05_peak_5413	chr10	99532162	99533165
2_wt.q.05_peak_1137	chr1	64854807	64855258
2_wt.q.05_peak_4452	chr10	56980287	56980941
2_wt.q.05_peak_6031	chr10	128344005	128345730
2_wt.q.05_peak_2650	chr1	158405573	158406848
2_wt.q.05_peak_3667	chr10	9879396	9880773
2_wt.q.05_peak_24110	chr2	7063475	7064358
2_wt.q.05_peak_32010	chr4	102855508	102856500
2_wt.q.05_peak_28481	chr3	55351509	55352559
2_wt.q.05_peak_32651	chr4	133299302	133299851
2_wt.q.05_peak_18769	chr16	62407673	62408138
2_wt.q.05_peak_22314	chr18	67572709	67573734
2_wt.q.05_peak_31770	chr4	87210886	87211945
2_wt.q.05_peak_42048	chr8	69130918	69132150
2_wt.q.05_peak_9763	chr12	58513691	58514071
2_wt.q.05_peak_39622	chr7	81654162	81654596
2_wt.q.05_peak_28060	chr3	26847744	26848054
2_wt.q.05_peak_11760	chr13	43261831	43262655
2_wt.q.05_peak_16549	chr15	67898899	67899580
2_wt.q.05_peak_2474	chr1	153310125	153310712
2_wt.q.05_peak_20204	chr17	50068944	50070833
2_wt.q.05_peak_32049	chr4	104502757	104503730
2_wt.q.05_peak_15223	chr14	116979357	116980372
2_wt.q.05_peak_3784	chr10	14207183	14208873
2_wt.q.05_peak_43806	chr9	40403518	40405159
2_wt.q.05_peak_39934	chr7	96474047	96475473
2_wt.q.05_peak_34570	chr5	92489067	92489627
2_wt.q.05_peak_13547	chr14	16379394	16380346
2_wt.q.05_peak_36515	chr6	40347501	40347794
2_wt.q.05_peak_11677	chr13	41339467	41340246
2_wt.q.05_peak_42864	chr8	111569222	111570030
2_wt.q.05_peak_9864	chr12	67008653	67009755
2_wt.q.05_peak_10204	chr12	80811002	80811945
2_wt.q.05_peak_25095	chr2	52713360	52715902
2_wt.q.05_peak_41896	chr8	61309816	61310565
2_wt.q.05_peak_45537	chr9	113018672	113020235
2_wt.q.05_peak_7163	chr11	60232892	60233555
2_wt.q.05_peak_26934	chr2	136301193	136301922
2_wt.q.05_peak_44411	chr9	62438370	62439187
2_wt.q.05_peak_15090	chr14	105167568	105168431
2_wt.q.05_peak_36426	chr6	37225095	37225392
2_wt.q.05_peak_19862	chr17	30187815	30188795
2_wt.q.05_peak_30669	chr4	12799179	12800301
2_wt.q.05_peak_24666	chr2	32816580	32817536
2_wt.q.05_peak_33099	chr4	155304673	155305907
2_wt.q.05_peak_9133	chr12	17097560	17098936
2_wt.q.05_peak_2135	chr1	134273384	134274491
2_wt.q.05_peak_34049	chr5	54097765	54098856
2_wt.q.05_peak_6239	chr11	12741594	12742996
2_wt.q.05_peak_42720	chr8	105445704	105446559
2_wt.q.05_peak_13664	chr14	21521968	21525047
2_wt.q.05_peak_17625	chr16	6479618	6480771
2_wt.q.05_peak_37815	chr6	115168292	115170167
2_wt.q.05_peak_24641	chr2	32341457	32343549
2_wt.q.05_peak_36477	chr6	39317744	39318017
2_wt.q.05_peak_29549	chr3	107505184	107506592
2_wt.q.05_peak_22716	chr18	88876542	88877525
2_wt.q.05_peak_43531	chr9	27766170	27767621
2_wt.q.05_peak_30104	chr3	137056758	137058521
2_wt.q.05_peak_2076	chr1	132591375	132591770
2_wt.q.05_peak_24901	chr2	43950664	43951234
2_wt.q.05_peak_25116	chr2	53711186	53713201
2_wt.q.05_peak_18300	chr16	34269619	34272525
2_wt.q.05_peak_18208	chr16	31896581	31897553
2_wt.q.05_peak_24204	chr2	8379540	8381477
2_wt.q.05_peak_24118	chr2	7093213	7093863
2_wt.q.05_peak_30662	chr4	12334826	12335495
2_wt.q.05_peak_17096	chr15	86363845	86364346
2_wt.q.05_peak_24109	chr2	7060517	7061249
2_wt.q.05_peak_2040	chr1	131452640	131453070
2_wt.q.05_peak_37199	chr6	88784475	88785074
2_wt.q.05_peak_15973	chr15	37514976	37515554
2_wt.q.05_peak_38115	chr6	134449870	134451367
2_wt.q.05_peak_13319	chr13	113821904	113822901
2_wt.q.05_peak_2581	chr1	156920286	156921553
2_wt.q.05_peak_28978	chr3	84204333	84206563
2_wt.q.05_peak_11882	chr13	46634422	46635106
2_wt.q.05_peak_25020	chr2	48100599	48100867
2_wt.q.05_peak_37633	chr6	108426106	108427217
2_wt.q.05_peak_41561	chr8	39129060	39131270
2_wt.q.05_peak_39308	chr7	64727988	64728615
2_wt.q.05_peak_9063	chr12	13418558	13419335
2_wt.q.05_peak_1599	chr1	91206676	91207782
2_wt.q.05_peak_25748	chr2	80724189	80724575
2_wt.q.05_peak_36798	chr6	58855595	58856000
2_wt.q.05_peak_18538	chr16	43935316	43936579
2_wt.q.05_peak_17526	chr15	102656953	102658875
2_wt.q.05_peak_42659	chr8	102552975	102553905
2_wt.q.05_peak_1688	chr1	97761005	97761555
2_wt.q.05_peak_18063	chr16	25039565	25040232
2_wt.q.05_peak_41508	chr8	36150300	36151220
2_wt.q.05_peak_12972	chr13	99493969	99494359
2_wt.q.05_peak_32274	chr4	119461072	119461545
2_wt.q.05_peak_6002	chr10	127595526	127596470
2_wt.q.05_peak_43419	chr9	24282305	24282867
2_wt.q.05_peak_9625	chr12	50080570	50082539
2_wt.q.05_peak_15357	chr14	121245846	121246687
2_wt.q.05_peak_32802	chr4	138447643	138447966
2_wt.q.05_peak_36210	chr6	29814603	29815080
2_wt.q.05_peak_22447	chr18	70120338	70120754
2_wt.q.05_peak_11206	chr13	13546272	13546779
2_wt.q.05_peak_34967	chr5	115125120	115126142
2_wt.q.05_peak_39525	chr7	78596167	78598384
2_wt.q.05_peak_20559	chr17	70595115	70597201
2_wt.q.05_peak_5502	chr10	107339251	107340854
2_wt.q.05_peak_46342	chrX	161780276	161781110
2_wt.q.05_peak_11461	chr13	24081529	24082308
2_wt.q.05_peak_19210	chr16	91962262	91962597
2_wt.q.05_peak_13809	chr14	27778639	27779644
2_wt.q.05_peak_26848	chr2	132751327	132751666
2_wt.q.05_peak_32286	chr4	119901251	119903312
2_wt.q.05_peak_20303	chr17	56445261	56445973
2_wt.q.05_peak_925	chr1	55499540	55500640
2_wt.q.05_peak_16959	chr15	81128242	81128802
2_wt.q.05_peak_41658	chr8	45714495	45716062
2_wt.q.05_peak_32279	chr4	119759070	119760487
2_wt.q.05_peak_26886	chr2	134914939	134916469
2_wt.q.05_peak_22127	chr18	60782627	60783607
2_wt.q.05_peak_46350	chrX	162555726	162556746
2_wt.q.05_peak_36074	chr6	21471423	21472231
2_wt.q.05_peak_29747	chr3	118445617	118446629
2_wt.q.05_peak_13667	chr14	21553154	21554205
2_wt.q.05_peak_32556	chr4	129706539	129707244
2_wt.q.05_peak_14399	chr14	64367916	64368938
2_wt.q.05_peak_34916	chr5	112499415	112500213
2_wt.q.05_peak_19563	chr17	13853679	13854751
2_wt.q.05_peak_40766	chr7	132762868	132765180
2_wt.q.05_peak_22522	chr18	75462102	75462448
2_wt.q.05_peak_29039	chr3	85338720	85339699
2_wt.q.05_peak_10787	chr12	106039973	106040439
2_wt.q.05_peak_10261	chr12	82397735	82398144
2_wt.q.05_peak_28822	chr3	79239143	79239832
2_wt.q.05_peak_29774	chr3	120729715	120730178
2_wt.q.05_peak_17254	chr15	94652170	94652585
2_wt.q.05_peak_19353	chr17	3248682	3250577
2_wt.q.05_peak_337	chr1	25165418	25167193
2_wt.q.05_peak_28256	chr3	39209369	39209690
2_wt.q.05_peak_33252	chr5	13421204	13421749
2_wt.q.05_peak_10014	chr12	72374116	72374533
2_wt.q.05_peak_24806	chr2	38023208	38024121
2_wt.q.05_peak_22471	chr18	72948298	72949500
2_wt.q.05_peak_7058	chr11	55016454	55017756
2_wt.q.05_peak_36726	chr6	54759897	54760386
2_wt.q.05_peak_33748	chr5	35137406	35138632
2_wt.q.05_peak_13666	chr14	21550533	21551347
2_wt.q.05_peak_9051	chr12	12716413	12717042
2_wt.q.05_peak_12257	chr13	68707426	68707973
2_wt.q.05_peak_36478	chr6	39318294	39318817
2_wt.q.05_peak_22900	chr19	7298645	7299566
2_wt.q.05_peak_34913	chr5	112371576	112371984
2_wt.q.05_peak_1180	chr1	66395009	66395557
2_wt.q.05_peak_24284	chr2	14132255	14133366
2_wt.q.05_peak_21650	chr18	37851808	37852710
2_wt.q.05_peak_136	chr1	13299426	13300024
2_wt.q.05_peak_21347	chr18	24751053	24751865
2_wt.q.05_peak_43245	chr9	10229520	10230110
2_wt.q.05_peak_302	chr1	24222731	24223383
2_wt.q.05_peak_43629	chr9	31295526	31296613
2_wt.q.05_peak_32418	chr4	126118220	126119452
2_wt.q.05_peak_11593	chr13	34575625	34576117
2_wt.q.05_peak_362	chr1	25698239	25699713
2_wt.q.05_peak_22545	chr18	77217738	77218042
2_wt.q.05_peak_15700	chr15	25365555	25367120
2_wt.q.05_peak_4073	chr10	29823359	29823800
2_wt.q.05_peak_21708	chr18	39302876	39303866
2_wt.q.05_peak_14524	chr14	66833293	66833781
2_wt.q.05_peak_3782	chr10	14193495	14194379
2_wt.q.05_peak_36827	chr6	61119059	61119779
2_wt.q.05_peak_6112	chr11	4679025	4679666
2_wt.q.05_peak_37111	chr6	86086602	86088394
2_wt.q.05_peak_30880	chr4	28298625	28299644
2_wt.q.05_peak_16083	chr15	40945913	40947348
2_wt.q.05_peak_6431	chr11	24483907	24484224
[truncated: 651 more rows]

## Sheet: MYT1L_E14_Active_Enhancer
PeakID	Chr	Start	End
2_wt.q.05_peak_41277	chr8	22877133	22878637
2_wt.q.05_peak_5424	chr10	100050953	100051417
2_wt.q.05_peak_37717	chr6	113000760	113001025
2_wt.q.05_peak_33787	chr5	36893083	36893656
2_wt.q.05_peak_37919	chr6	118977695	118978299
2_wt.q.05_peak_40994	chr8	8622150	8622858
2_wt.q.05_peak_3174	chr1	177411456	177411780
2_wt.q.05_peak_34930	chr5	112780300	112782338
2_wt.q.05_peak_9663	chr12	51275754	51276328
2_wt.q.05_peak_30057	chr3	136007352	136008677
2_wt.q.05_peak_16854	chr15	78542236	78543725
2_wt.q.05_peak_46003	chrX	69008938	69009839
2_wt.q.05_peak_44390	chr9	61278011	61278706
2_wt.q.05_peak_12589	chr13	84624486	84624802
2_wt.q.05_peak_9610	chr12	49740210	49740700
2_wt.q.05_peak_14328	chr14	62388679	62390096
2_wt.q.05_peak_5241	chr10	93280734	93281201
2_wt.q.05_peak_16070	chr15	40166818	40167227
2_wt.q.05_peak_42498	chr8	90867992	90870933
2_wt.q.05_peak_6086	chr11	3853149	3853526
2_wt.q.05_peak_29778	chr3	120896808	120898982
2_wt.q.05_peak_35019	chr5	116442990	116444230
2_wt.q.05_peak_22019	chr18	55290640	55290998
2_wt.q.05_peak_13881	chr14	30348687	30349395
2_wt.q.05_peak_22243	chr18	65077314	65077635
2_wt.q.05_peak_32103	chr4	107766086	107766403
2_wt.q.05_peak_20233	chr17	51807333	51807803
2_wt.q.05_peak_9835	chr12	65066031	65068002
2_wt.q.05_peak_37092	chr6	85544500	85544821
2_wt.q.05_peak_41363	chr8	26244048	26244458
2_wt.q.05_peak_21152	chr18	11995916	11996645
2_wt.q.05_peak_33742	chr5	34989425	34990236
2_wt.q.05_peak_29781	chr3	121101565	121102554
2_wt.q.05_peak_14406	chr14	64409147	64410167
2_wt.q.05_peak_20875	chr17	87377870	87379114
2_wt.q.05_peak_28740	chr3	70307314	70308240
2_wt.q.05_peak_18071	chr16	25660742	25661132
2_wt.q.05_peak_22442	chr18	69820276	69820692
2_wt.q.05_peak_16596	chr15	68939157	68940190
2_wt.q.05_peak_34655	chr5	98997750	98998251
2_wt.q.05_peak_18652	chr16	51758513	51759547
2_wt.q.05_peak_26365	chr2	114542627	114543102
2_wt.q.05_peak_18653	chr16	51937392	51937692
2_wt.q.05_peak_30048	chr3	135469640	135470580
2_wt.q.05_peak_17277	chr15	95285152	95285976
2_wt.q.05_peak_16418	chr15	60089164	60089461
2_wt.q.05_peak_16600	chr15	68949189	68950155
2_wt.q.05_peak_13191	chr13	109278627	109279326
2_wt.q.05_peak_12630	chr13	88554493	88555089
2_wt.q.05_peak_19488	chr17	10304073	10304642
2_wt.q.05_peak_31499	chr4	71130584	71130971
2_wt.q.05_peak_39990	chr7	98236801	98237329
2_wt.q.05_peak_25007	chr2	46239887	46240365
2_wt.q.05_peak_16179	chr15	44823651	44824194
2_wt.q.05_peak_22517	chr18	75195104	75196025
2_wt.q.05_peak_10510	chr12	93993947	93994233
2_wt.q.05_peak_4414	chr10	53397736	53398587
2_wt.q.05_peak_29996	chr3	132007437	132007965
2_wt.q.05_peak_33786	chr5	36890576	36892774
2_wt.q.05_peak_4145	chr10	34316336	34317191
2_wt.q.05_peak_44334	chr9	59198545	59199008
2_wt.q.05_peak_18640	chr16	50309126	50310069
2_wt.q.05_peak_33320	chr5	18273889	18274756
2_wt.q.05_peak_3176	chr1	177427990	177429544
2_wt.q.05_peak_32571	chr4	130270367	130270877
2_wt.q.05_peak_522	chr1	37077559	37078158
2_wt.q.05_peak_41814	chr8	55018047	55018318
2_wt.q.05_peak_15956	chr15	36960175	36961107
2_wt.q.05_peak_43954	chr9	44856929	44857968
2_wt.q.05_peak_29858	chr3	123806308	123806637
2_wt.q.05_peak_26980	chr2	138033619	138034245
2_wt.q.05_peak_11114	chr13	9282717	9283688
2_wt.q.05_peak_16595	chr15	68936937	68937802
2_wt.q.05_peak_28034	chr3	25697023	25697402
2_wt.q.05_peak_18420	chr16	37974454	37975063
2_wt.q.05_peak_18042	chr16	23250049	23250804
2_wt.q.05_peak_12682	chr13	91636759	91637250
2_wt.q.05_peak_25288	chr2	62803728	62804206
2_wt.q.05_peak_12447	chr13	80611197	80614246
2_wt.q.05_peak_11898	chr13	47413060	47414269
2_wt.q.05_peak_28819	chr3	79159968	79162101
2_wt.q.05_peak_17166	chr15	91171516	91171815
2_wt.q.05_peak_29330	chr3	96576695	96577315
2_wt.q.05_peak_10760	chr12	104738036	104738452
2_wt.q.05_peak_24972	chr2	45061811	45063227
2_wt.q.05_peak_39064	chr7	46838496	46839122
2_wt.q.05_peak_35687	chr5	144163531	144164749
2_wt.q.05_peak_38335	chr6	144154895	144156447
2_wt.q.05_peak_11779	chr13	43541168	43542026
2_wt.q.05_peak_12672	chr13	91432534	91433153
2_wt.q.05_peak_44478	chr9	65015503	65016154
2_wt.q.05_peak_38554	chr7	16146210	16147011
2_wt.q.05_peak_43603	chr9	29802824	29803750
2_wt.q.05_peak_25061	chr2	50044736	50045595
2_wt.q.05_peak_25345	chr2	65832393	65833670
2_wt.q.05_peak_20899	chr17	88274155	88275429
2_wt.q.05_peak_30755	chr4	17634935	17636680
2_wt.q.05_peak_22018	chr18	55289852	55290371
2_wt.q.05_peak_8539	chr11	108756552	108758425
2_wt.q.05_peak_31779	chr4	87401874	87402478
2_wt.q.05_peak_40275	chr7	112232690	112235116
2_wt.q.05_peak_33589	chr5	29253755	29254298
2_wt.q.05_peak_41594	chr8	40614174	40614534
2_wt.q.05_peak_18098	chr16	28237906	28239239
2_wt.q.05_peak_14435	chr14	64834703	64835515
2_wt.q.05_peak_41593	chr8	40612586	40613524
2_wt.q.05_peak_39737	chr7	89140437	89141158
2_wt.q.05_peak_42138	chr8	71719829	71720244
2_wt.q.05_peak_24927	chr2	44340796	44341572
2_wt.q.05_peak_36772	chr6	56903872	56904334
2_wt.q.05_peak_15069	chr14	103471051	103471393
2_wt.q.05_peak_26214	chr2	105797520	105798490
2_wt.q.05_peak_24890	chr2	43782293	43783415
2_wt.q.05_peak_29605	chr3	108405683	108406501
2_wt.q.05_peak_8600	chr11	111522961	111523635
2_wt.q.05_peak_25228	chr2	61649860	61650401
2_wt.q.05_peak_31523	chr4	75212751	75213660
2_wt.q.05_peak_1177	chr1	66374744	66375023
2_wt.q.05_peak_11694	chr13	42102668	42103978
2_wt.q.05_peak_38316	chr6	143414273	143415939
2_wt.q.05_peak_19032	chr16	78321500	78322666
2_wt.q.05_peak_26199	chr2	104468744	104469538
2_wt.q.05_peak_24412	chr2	21036703	21037945
2_wt.q.05_peak_38131	chr6	134825945	134826817
2_wt.q.05_peak_16137	chr15	43003375	43003956
2_wt.q.05_peak_42801	chr8	109464593	109465434
2_wt.q.05_peak_4858	chr10	77315785	77316704
2_wt.q.05_peak_27335	chr2	154588529	154589849
2_wt.q.05_peak_1326	chr1	76491094	76491644
2_wt.q.05_peak_9646	chr12	50804539	50804985
2_wt.q.05_peak_36796	chr6	58835533	58836961
2_wt.q.05_peak_15017	chr14	101839329	101844106
2_wt.q.05_peak_21391	chr18	26261071	26262133
2_wt.q.05_peak_6940	chr11	50457108	50457965
2_wt.q.05_peak_36892	chr6	70871889	70872709
2_wt.q.05_peak_30806	chr4	22392700	22393282
2_wt.q.05_peak_19195	chr16	91533150	91533627
2_wt.q.05_peak_37773	chr6	113936103	113936814
2_wt.q.05_peak_44396	chr9	61714099	61714524
2_wt.q.05_peak_27777	chr2	181159532	181159952
2_wt.q.05_peak_8920	chr12	5246714	5247081
2_wt.q.05_peak_25229	chr2	61650706	61651619
2_wt.q.05_peak_28376	chr3	51228709	51229656
2_wt.q.05_peak_45170	chr9	103692085	103692833
2_wt.q.05_peak_18319	chr16	34468466	34471165
2_wt.q.05_peak_27652	chr2	167941844	167943375
2_wt.q.05_peak_33839	chr5	40136729	40137242
2_wt.q.05_peak_22146	chr18	60933399	60935030
2_wt.q.05_peak_35985	chr6	16487179	16487441
2_wt.q.05_peak_29782	chr3	121103296	121103690
2_wt.q.05_peak_45626	chr9	115977887	115978840
2_wt.q.05_peak_20232	chr17	51805785	51806946
2_wt.q.05_peak_4814	chr10	75684451	75684742
2_wt.q.05_peak_23154	chr19	21738508	21739215
2_wt.q.05_peak_41634	chr8	45022115	45022459
2_wt.q.05_peak_25350	chr2	65895790	65897704
2_wt.q.05_peak_20247	chr17	53678160	53678809
2_wt.q.05_peak_27745	chr2	180115610	180116000
2_wt.q.05_peak_23745	chr19	50374244	50375123
2_wt.q.05_peak_31792	chr4	87984347	87985397
2_wt.q.05_peak_3159	chr1	177188427	177189420
2_wt.q.05_peak_24273	chr2	13523781	13524523
2_wt.q.05_peak_33298	chr5	16155754	16156292
2_wt.q.05_peak_500	chr1	36095307	36096343
2_wt.q.05_peak_10289	chr12	83003054	83004385
2_wt.q.05_peak_32593	chr4	131324393	131325451
2_wt.q.05_peak_9403	chr12	34496090	34496524
2_wt.q.05_peak_20359	chr17	63113004	63113300
2_wt.q.05_peak_14882	chr14	86749248	86750910
2_wt.q.05_peak_39939	chr7	96523498	96524001
2_wt.q.05_peak_7681	chr11	79501220	79502996
2_wt.q.05_peak_13460	chr14	11630921	11631311
2_wt.q.05_peak_36484	chr6	39527168	39528023
2_wt.q.05_peak_4694	chr10	69593918	69594685
2_wt.q.05_peak_36444	chr6	38065303	38065931
2_wt.q.05_peak_684	chr1	43136992	43141347
2_wt.q.05_peak_24971	chr2	45060587	45061343
2_wt.q.05_peak_16055	chr15	39816332	39817531
2_wt.q.05_peak_34939	chr5	113195748	113196055
2_wt.q.05_peak_25208	chr2	59979577	59980133
2_wt.q.05_peak_2664	chr1	159163224	159163973
2_wt.q.05_peak_21228	chr18	16475367	16476035
2_wt.q.05_peak_34828	chr5	107961096	107961983
2_wt.q.05_peak_17306	chr15	95931224	95932534
2_wt.q.05_peak_20723	chr17	80709486	80710747
2_wt.q.05_peak_44527	chr9	66360453	66361223
2_wt.q.05_peak_42699	chr8	104435028	104436602
2_wt.q.05_peak_33784	chr5	36884643	36885325
2_wt.q.05_peak_7701	chr11	80304354	80305487
2_wt.q.05_peak_30786	chr4	20670225	20670630
2_wt.q.05_peak_25179	chr2	58476073	58477110
2_wt.q.05_peak_20617	chr17	73271589	73271977
2_wt.q.05_peak_8922	chr12	5267747	5268241
2_wt.q.05_peak_200	chr1	18181562	18181928
2_wt.q.05_peak_24904	chr2	43977304	43978926
2_wt.q.05_peak_15073	chr14	103552311	103552993
2_wt.q.05_peak_43955	chr9	44858436	44859281
2_wt.q.05_peak_29966	chr3	129590683	129590982
2_wt.q.05_peak_30292	chr3	145834174	145834679
2_wt.q.05_peak_13980	chr14	36918417	36919947
2_wt.q.05_peak_32333	chr4	122909305	122909595
2_wt.q.05_peak_10824	chr12	108432931	108433645
2_wt.q.05_peak_11612	chr13	36298281	36298713
2_wt.q.05_peak_45707	chr9	121384480	121385475
2_wt.q.05_peak_11557	chr13	31248919	31250032
2_wt.q.05_peak_38218	chr6	136553605	136556648
2_wt.q.05_peak_4513	chr10	59547518	59547894
2_wt.q.05_peak_22502	chr18	74714404	74715763
2_wt.q.05_peak_35899	chr6	8430384	8431051
2_wt.q.05_peak_31663	chr4	82619147	82620051
2_wt.q.05_peak_12834	chr13	95912160	95913059
2_wt.q.05_peak_22030	chr18	56332910	56333429
2_wt.q.05_peak_36797	chr6	58837679	58837942
2_wt.q.05_peak_27052	chr2	141844635	141845443
2_wt.q.05_peak_46415	chrY	90799418	90799723
2_wt.q.05_peak_14942	chr14	93713489	93714308
2_wt.q.05_peak_23868	chr19	57236929	57239959
2_wt.q.05_peak_25112	chr2	53204521	53205343
2_wt.q.05_peak_12609	chr13	85164399	85165186
2_wt.q.05_peak_14900	chr14	88465695	88466842
2_wt.q.05_peak_38315	chr6	143287473	143288940
2_wt.q.05_peak_35866	chr6	5739624	5742064
2_wt.q.05_peak_12885	chr13	97537567	97538115
2_wt.q.05_peak_44288	chr9	57861671	57862704
2_wt.q.05_peak_35025	chr5	117031904	117032188
2_wt.q.05_peak_38140	chr6	135092368	135093337
2_wt.q.05_peak_29681	chr3	116906152	116906683
2_wt.q.05_peak_27738	chr2	179762763	179763160
2_wt.q.05_peak_45096	chr9	99428875	99430372
2_wt.q.05_peak_44286	chr9	57830883	57832460
2_wt.q.05_peak_24911	chr2	44060763	44061224
2_wt.q.05_peak_2602	chr1	157230172	157233045
2_wt.q.05_peak_24576	chr2	30119736	30120068
2_wt.q.05_peak_31199	chr4	47693338	47693670
2_wt.q.05_peak_35893	chr6	8274691	8275217
2_wt.q.05_peak_20871	chr17	87331520	87332590
2_wt.q.05_peak_31982	chr4	102239590	102241166
2_wt.q.05_peak_15951	chr15	36779944	36781879
2_wt.q.05_peak_38200	chr6	136163041	136163311
2_wt.q.05_peak_38356	chr6	144961283	144962123
2_wt.q.05_peak_3360	chr1	186988489	186989122
2_wt.q.05_peak_1633	chr1	93071192	93071969
2_wt.q.05_peak_27494	chr2	161044732	161045340
2_wt.q.05_peak_34230	chr5	69009299	69010019
2_wt.q.05_peak_21998	chr18	54379580	54380217
2_wt.q.05_peak_14006	chr14	38992060	38993041
2_wt.q.05_peak_12906	chr13	97824218	97824940
2_wt.q.05_peak_23970	chr2	4436143	4437318
2_wt.q.05_peak_16089	chr15	41068456	41069108
2_wt.q.05_peak_31789	chr4	87928707	87929634
2_wt.q.05_peak_46418	chrY	90807834	90808495
2_wt.q.05_peak_5159	chr10	90722657	90724761
2_wt.q.05_peak_6204	chr11	7705691	7706103
2_wt.q.05_peak_19774	chr17	26709225	26710403
2_wt.q.05_peak_43687	chr9	35523870	35524275
2_wt.q.05_peak_34630	chr5	97953198	97953745
2_wt.q.05_peak_4460	chr10	57743677	57744504
2_wt.q.05_peak_3126	chr1	176877654	176879450
2_wt.q.05_peak_8179	chr11	98782171	98783460
2_wt.q.05_peak_7263	chr11	65744746	65746899
2_wt.q.05_peak_15385	chr14	122957556	122958067
2_wt.q.05_peak_2416	chr1	151095806	151096185
2_wt.q.05_peak_39146	chr7	54633966	54634544
2_wt.q.05_peak_4098	chr10	31504026	31504662
2_wt.q.05_peak_17489	chr15	101240923	101241676
2_wt.q.05_peak_14698	chr14	74882897	74883559
2_wt.q.05_peak_23259	chr19	27123484	27124191
2_wt.q.05_peak_11905	chr13	48593076	48595240
2_wt.q.05_peak_5329	chr10	98485508	98487075
2_wt.q.05_peak_10384	chr12	86699326	86700484
2_wt.q.05_peak_41436	chr8	32792779	32793214
2_wt.q.05_peak_34473	chr5	83778883	83779164
2_wt.q.05_peak_32207	chr4	115847171	115847980
2_wt.q.05_peak_41733	chr8	48312127	48313864
2_wt.q.05_peak_28750	chr3	70874054	70874582
2_wt.q.05_peak_33495	chr5	23604786	23606248
2_wt.q.05_peak_40032	chr7	99963312	99966297
2_wt.q.05_peak_34903	chr5	111864134	111864716
2_wt.q.05_peak_29783	chr3	121104110	121105366
2_wt.q.05_peak_14590	chr14	70460046	70460700
2_wt.q.05_peak_12833	chr13	95910604	95911874
2_wt.q.05_peak_5293	chr10	95616048	95616477
2_wt.q.05_peak_1064	chr1	61470955	61471620
2_wt.q.05_peak_6440	chr11	25314238	25315299
2_wt.q.05_peak_37437	chr6	99600112	99601429
2_wt.q.05_peak_3857	chr10	18660624	18661979
2_wt.q.05_peak_30054	chr3	135886557	135887094
2_wt.q.05_peak_18065	chr16	25255869	25256249
2_wt.q.05_peak_38546	chr7	16103583	16104149
2_wt.q.05_peak_44879	chr9	84109295	84112405
2_wt.q.05_peak_36666	chr6	50807841	50808214
2_wt.q.05_peak_14881	chr14	86748511	86748892
2_wt.q.05_peak_14739	chr14	76432234	76433052
2_wt.q.05_peak_33531	chr5	24985411	24986346
2_wt.q.05_peak_6980	chr11	52086205	52087013
2_wt.q.05_peak_34621	chr5	97641534	97642619
2_wt.q.05_peak_42197	chr8	74888793	74889358
2_wt.q.05_peak_17050	chr15	84957595	84958332
2_wt.q.05_peak_14332	chr14	62561749	62562674
2_wt.q.05_peak_31265	chr4	53437361	53438446
2_wt.q.05_peak_4185	chr10	39165765	39166200
2_wt.q.05_peak_810	chr1	51720149	51720653
2_wt.q.05_peak_39535	chr7	78798040	78798355
2_wt.q.05_peak_29808	chr3	122477255	122479047
2_wt.q.05_peak_45136	chr9	102038941	102039418
2_wt.q.05_peak_29811	chr3	122484094	122484508
2_wt.q.05_peak_4072	chr10	29538177	29539985
2_wt.q.05_peak_30052	chr3	135731537	135731988
2_wt.q.05_peak_41328	chr8	25190707	25192162
2_wt.q.05_peak_23741	chr19	50142116	50142404
2_wt.q.05_peak_18786	chr16	63118669	63119233
2_wt.q.05_peak_31582	chr4	78581469	78582120
2_wt.q.05_peak_16396	chr15	59054470	59055247
2_wt.q.05_peak_38201	chr6	136165482	136165948
2_wt.q.05_peak_21545	chr18	35021531	35021964
2_wt.q.05_peak_1855	chr1	118480822	118482405
2_wt.q.05_peak_25263	chr2	62457394	62458635
2_wt.q.05_peak_10820	chr12	108317360	108317986
2_wt.q.05_peak_10593	chr12	98720553	98721087
2_wt.q.05_peak_22424	chr18	69616767	69619053
2_wt.q.05_peak_44855	chr9	83317363	83317870
2_wt.q.05_peak_31828	chr4	91244316	91244709
2_wt.q.05_peak_10825	chr12	108436008	108437153
2_wt.q.05_peak_21961	chr18	51282143	51283263
2_wt.q.05_peak_30262	chr3	144319288	144320024
2_wt.q.05_peak_9815	chr12	61807099	61808146
2_wt.q.05_peak_22261	chr18	65191178	65191761
2_wt.q.05_peak_12886	chr13	97538461	97538962
2_wt.q.05_peak_8999	chr12	10866771	10867329
2_wt.q.05_peak_27051	chr2	141817835	141818524
2_wt.q.05_peak_4032	chr10	28113413	28114368
2_wt.q.05_peak_20523	chr17	70429921	70431091
2_wt.q.05_peak_1829	chr1	111834115	111834557
2_wt.q.05_peak_36521	chr6	40438099	40439072
2_wt.q.05_peak_5439	chr10	100865343	100865918
2_wt.q.05_peak_16177	chr15	44764264	44765021
2_wt.q.05_peak_43149	chr8	127535120	127536317
2_wt.q.05_peak_17086	chr15	86066874	86067703
2_wt.q.05_peak_40278	chr7	112240286	112242147
2_wt.q.05_peak_5267	chr10	94584551	94584899
2_wt.q.05_peak_28687	chr3	68592297	68594241
2_wt.q.05_peak_1068	chr1	62215872	62216721
2_wt.q.05_peak_2606	chr1	157256215	157256554
2_wt.q.05_peak_2578	chr1	156857092	156857656
2_wt.q.05_peak_23198	chr19	23187489	23187792
2_wt.q.05_peak_21362	chr18	25238970	25240232
2_wt.q.05_peak_36361	chr6	34638050	34639012
2_wt.q.05_peak_14367	chr14	64125811	64126446
2_wt.q.05_peak_22980	chr19	10397643	10398601
2_wt.q.05_peak_7755	chr11	82579611	82580238
2_wt.q.05_peak_24275	chr2	13548495	13549214
2_wt.q.05_peak_33525	chr5	24834058	24835047
2_wt.q.05_peak_13344	chr13	116110630	116111484
2_wt.q.05_peak_24892	chr2	43785656	43786509
2_wt.q.05_peak_38555	chr7	16148928	16150175
2_wt.q.05_peak_31529	chr4	75561941	75562794
2_wt.q.05_peak_24291	chr2	14740202	14741469
2_wt.q.05_peak_12413	chr13	78099962	78100439
2_wt.q.05_peak_1069	chr1	62562304	62562767
2_wt.q.05_peak_44333	chr9	59197782	59198084
2_wt.q.05_peak_37496	chr6	101937566	101938127
2_wt.q.05_peak_22057	chr18	58188540	58189310
2_wt.q.05_peak_11236	chr13	14517111	14518827
2_wt.q.05_peak_46417	chrY	90804500	90804922
2_wt.q.05_peak_3940	chr10	21923772	21924034
2_wt.q.05_peak_20881	chr17	87460295	87460629
2_wt.q.05_peak_9505	chr12	40842294	40843396
2_wt.q.05_peak_157	chr1	15482934	15483886
2_wt.q.05_peak_10250	chr12	82338815	82340864
2_wt.q.05_peak_29956	chr3	128519097	128519421
2_wt.q.05_peak_420	chr1	31064802	31065713
2_wt.q.05_peak_19351	chr17	3230048	3230577
2_wt.q.05_peak_29600	chr3	108379064	108380031
2_wt.q.05_peak_33175	chr5	6179383	6179825
2_wt.q.05_peak_15232	chr14	117425788	117426672
2_wt.q.05_peak_25877	chr2	90962337	90966470
2_wt.q.05_peak_18684	chr16	54943004	54944522
2_wt.q.05_peak_10761	chr12	104741947	104742631
2_wt.q.05_peak_15698	chr15	25278249	25278865
2_wt.q.05_peak_15785	chr15	27903007	27904423
2_wt.q.05_peak_28631	chr3	65322012	65322646
2_wt.q.05_peak_15580	chr15	13635382	13635739
2_wt.q.05_peak_1198	chr1	66895931	66896289
2_wt.q.05_peak_27655	chr2	168106595	168107332
2_wt.q.05_peak_19046	chr16	79651117	79652146
2_wt.q.05_peak_39687	chr7	84371977	84372448
2_wt.q.05_peak_3850	chr10	18526430	18528966
2_wt.q.05_peak_21252	chr18	19603759	19604324
2_wt.q.05_peak_12778	chr13	93452943	93453773
2_wt.q.05_peak_2709	chr1	160276612	160277040
2_wt.q.05_peak_2008	chr1	129634807	129635589
2_wt.q.05_peak_37677	chr6	110709678	110710158
2_wt.q.05_peak_4358	chr10	46826852	46827153
2_wt.q.05_peak_30336	chr3	148922201	148923448
2_wt.q.05_peak_43513	chr9	27306954	27307703
2_wt.q.05_peak_25152	chr2	56257445	56257943
2_wt.q.05_peak_45562	chr9	113432800	113434023
2_wt.q.05_peak_9618	chr12	49950906	49954204
2_wt.q.05_peak_32218	chr4	116175729	116176486
2_wt.q.05_peak_39922	chr7	95725701	95726381
2_wt.q.05_peak_18421	chr16	37987902	37988805
2_wt.q.05_peak_15194	chr14	113469330	113470654
2_wt.q.05_peak_5221	chr10	93123209	93124375
2_wt.q.05_peak_36754	chr6	55808414	55808847
2_wt.q.05_peak_23871	chr19	57274403	57276193
2_wt.q.05_peak_17532	chr15	102788426	102789747
2_wt.q.05_peak_31383	chr4	62698875	62699845
2_wt.q.05_peak_4470	chr10	58372704	58373439
2_wt.q.05_peak_22250	chr18	65124889	65125188
2_wt.q.05_peak_38238	chr6	137934993	137935772
2_wt.q.05_peak_22585	chr18	78931873	78932789
2_wt.q.05_peak_30674	chr4	13146616	13147936
2_wt.q.05_peak_7712	chr11	80487719	80489277
2_wt.q.05_peak_42294	chr8	83200507	83201184
2_wt.q.05_peak_6308	chr11	19982656	19983829
2_wt.q.05_peak_33302	chr5	16313911	16314761
2_wt.q.05_peak_19878	chr17	30497355	30498012
2_wt.q.05_peak_42893	chr8	112906945	112907230
2_wt.q.05_peak_43511	chr9	27303234	27303847
2_wt.q.05_peak_41142	chr8	14970567	14972647
2_wt.q.05_peak_24400	chr2	20898917	20899457
2_wt.q.05_peak_7868	chr11	86995294	86995968
2_wt.q.05_peak_12441	chr13	79182732	79183066
2_wt.q.05_peak_11506	chr13	26267806	26268135
2_wt.q.05_peak_36830	chr6	61296570	61297000
2_wt.q.05_peak_40256	chr7	112100440	112100951
2_wt.q.05_peak_4173	chr10	37907572	37908052
2_wt.q.05_peak_12716	chr13	92751229	92751858
2_wt.q.05_peak_1720	chr1	98924069	98925634
2_wt.q.05_peak_24891	chr2	43783817	43784614
2_wt.q.05_peak_3711	chr10	11739762	11740130
2_wt.q.05_peak_24970	chr2	45059355	45060318
2_wt.q.05_peak_30926	chr4	32303341	32303822
2_wt.q.05_peak_29651	chr3	114065010	114066049
2_wt.q.05_peak_39114	chr7	49555890	49559674
2_wt.q.05_peak_24290	chr2	14739071	14739936
2_wt.q.05_peak_14591	chr14	70460986	70462647
2_wt.q.05_peak_6333	chr11	20987506	20988890
2_wt.q.05_peak_19197	chr16	91579216	91580064
2_wt.q.05_peak_30630	chr4	10352094	10352440
2_wt.q.05_peak_15160	chr14	109708645	109709269
2_wt.q.05_peak_28440	chr3	53890581	53891572
2_wt.q.05_peak_15181	chr14	111821820	111822606
2_wt.q.05_peak_12445	chr13	80408619	80409414
2_wt.q.05_peak_42543	chr8	94066108	94066905
2_wt.q.05_peak_26399	chr2	116048398	116050326
2_wt.q.05_peak_36993	chr6	77724839	77725510
2_wt.q.05_peak_20869	chr17	87330056	87330624
2_wt.q.05_peak_11880	chr13	46571355	46572401
2_wt.q.05_peak_24494	chr2	26341602	26342136
2_wt.q.05_peak_32138	chr4	109122588	109123171
2_wt.q.05_peak_16602	chr15	68954551	68955098
2_wt.q.05_peak_601	chr1	39251482	39251820
2_wt.q.05_peak_22233	chr18	65023006	65027843
2_wt.q.05_peak_1941	chr1	127152855	127153298
2_wt.q.05_peak_30677	chr4	13586692	13587215
2_wt.q.05_peak_36801	chr6	58904491	58907333
2_wt.q.05_peak_18910	chr16	70880693	70881224
2_wt.q.05_peak_33065	chr4	153017853	153019157
2_wt.q.05_peak_12526	chr13	83521591	83538419
2_wt.q.05_peak_24044	chr2	6666502	6668124
2_wt.q.05_peak_41469	chr8	34679720	34680170
2_wt.q.05_peak_43512	chr9	27304344	27305408
2_wt.q.05_peak_22139	chr18	60901246	60901772
2_wt.q.05_peak_27933	chr3	17862255	17862910
2_wt.q.05_peak_527	chr1	37347313	37347913
2_wt.q.05_peak_16421	chr15	60630788	60631351
2_wt.q.05_peak_25051	chr2	49624963	49627083
2_wt.q.05_peak_24909	chr2	44028976	44030334
2_wt.q.05_peak_13665	chr14	21533228	21535212
2_wt.q.05_peak_13158	chr13	107207832	107208668
2_wt.q.05_peak_11860	chr13	46161757	46162153
2_wt.q.05_peak_9404	chr12	34497334	34498855
2_wt.q.05_peak_44363	chr9	59723461	59724770
2_wt.q.05_peak_22009	chr18	54847227	54847968
2_wt.q.05_peak_44878	chr9	84106969	84108260
2_wt.q.05_peak_16651	chr15	70727894	70728394
2_wt.q.05_peak_45708	chr9	121387626	121388433
2_wt.q.05_peak_43316	chr9	16931228	16931991
2_wt.q.05_peak_22149	chr18	60949258	60950661
2_wt.q.05_peak_19355	chr17	3347279	3347873
2_wt.q.05_peak_14709	chr14	75513120	75513515
2_wt.q.05_peak_34791	chr5	105868247	105868756
2_wt.q.05_peak_23239	chr19	26340129	26340696
2_wt.q.05_peak_17972	chr16	20746411	20747407
2_wt.q.05_peak_5617	chr10	109326415	109327890
2_wt.q.05_peak_34517	chr5	88929198	88930001
2_wt.q.05_peak_2607	chr1	157256821	157257178
2_wt.q.05_peak_44854	chr9	83316071	83316932
2_wt.q.05_peak_14730	chr14	76076419	76077368
2_wt.q.05_peak_15070	chr14	103471786	103473096
2_wt.q.05_peak_17274	chr15	95185394	95186311
2_wt.q.05_peak_30930	chr4	32432752	32433423
2_wt.q.05_peak_35785	chr5	149337546	149338327
2_wt.q.05_peak_38290	chr6	140519437	140519948
2_wt.q.05_peak_7546	chr11	75869327	75870581
2_wt.q.05_peak_10556	chr12	97326669	97327066
2_wt.q.05_peak_29437	chr3	101593160	101594880
2_wt.q.05_peak_9572	chr12	45467348	45468550
2_wt.q.05_peak_43166	chr8	128415833	128416409
2_wt.q.05_peak_496	chr1	35869726	35870158
2_wt.q.05_peak_15081	chr14	103679573	103680325
2_wt.q.05_peak_18185	chr16	31695281	31698881
2_wt.q.05_peak_22672	chr18	84998652	84999390
2_wt.q.05_peak_20870	chr17	87330932	87331216
2_wt.q.05_peak_24929	chr2	44410383	44411669
2_wt.q.05_peak_6939	chr11	50454440	50455281
2_wt.q.05_peak_19151	chr16	89897456	89898420
2_wt.q.05_peak_14459	chr14	65245432	65246277
2_wt.q.05_peak_27949	chr3	18705474	18706457
2_wt.q.05_peak_7561	chr11	76506709	76508515
2_wt.q.05_peak_4011	chr10	27103646	27104539
2_wt.q.05_peak_38128	chr6	134771792	134772236
2_wt.q.05_peak_5355	chr10	98942644	98944765
2_wt.q.05_peak_28611	chr3	63411065	63412148
2_wt.q.05_peak_25508	chr2	71598326	71598848
2_wt.q.05_peak_34493	chr5	85346276	85346765
2_wt.q.05_peak_13331	chr13	114137025	114140080
2_wt.q.05_peak_8748	chr11	118209790	118210830
2_wt.q.05_peak_43941	chr9	44457282	44457846
2_wt.q.05_peak_27871	chr3	10891981	10892345
2_wt.q.05_peak_11432	chr13	23490717	23491565
2_wt.q.05_peak_13291	chr13	112840356	112841349
2_wt.q.05_peak_31389	chr4	64142862	64143144
2_wt.q.05_peak_35305	chr5	125804427	125805757
2_wt.q.05_peak_30676	chr4	13286325	13287090
2_wt.q.05_peak_36753	chr6	55806331	55807634
2_wt.q.05_peak_29957	chr3	128519871	128521201
2_wt.q.05_peak_23552	chr19	43444144	43445607
2_wt.q.05_peak_19031	chr16	78319131	78319499
2_wt.q.05_peak_29581	chr3	108195847	108196762
2_wt.q.05_peak_41141	chr8	14967519	14968489
2_wt.q.05_peak_14941	chr14	93701538	93702170
2_wt.q.05_peak_4061	chr10	29213927	29214258
2_wt.q.05_peak_16534	chr15	66893156	66894615
2_wt.q.05_peak_32058	chr4	104893979	104894474
2_wt.q.05_peak_27853	chr3	9571770	9572465
2_wt.q.05_peak_39447	chr7	73546195	73548512
2_wt.q.05_peak_9953	chr12	70367479	70369667
2_wt.q.05_peak_18993	chr16	77076797	77078267
2_wt.q.05_peak_37895	chr6	118070127	118070464
2_wt.q.05_peak_6446	chr11	25646108	25646545
2_wt.q.05_peak_28506	chr3	55542571	55543599
2_wt.q.05_peak_38202	chr6	136166442	136167554
2_wt.q.05_peak_36755	chr6	55810601	55812531
2_wt.q.05_peak_35968	chr6	14720697	14721645
2_wt.q.05_peak_45706	chr9	121382314	121384040
2_wt.q.05_peak_20736	chr17	80844952	80845962
2_wt.q.05_peak_4367	chr10	49714955	49715236
2_wt.q.05_peak_5359	chr10	98958892	98961349
2_wt.q.05_peak_38237	chr6	137870753	137871665
2_wt.q.05_peak_19020	chr16	77788163	77788524
2_wt.q.05_peak_20751	chr17	81010977	81011617
2_wt.q.05_peak_1168	chr1	66292288	66293144
2_wt.q.05_peak_8954	chr12	7050838	7051246
2_wt.q.05_peak_34415	chr5	77888099	77888829
2_wt.q.05_peak_18507	chr16	42255756	42256084
2_wt.q.05_peak_35933	chr6	12248756	12249090
2_wt.q.05_peak_15035	chr14	102902652	102903410
2_wt.q.05_peak_24651	chr2	32447215	32448558
2_wt.q.05_peak_5366	chr10	98976629	98977870
2_wt.q.05_peak_6307	chr11	19981370	19982038
2_wt.q.05_peak_21294	chr18	22850415	22851096
2_wt.q.05_peak_15386	chr14	122958336	122958608
2_wt.q.05_peak_24719	chr2	33794795	33795191
2_wt.q.05_peak_41820	chr8	55102487	55102969
2_wt.q.05_peak_1348	chr1	77521732	77522498
2_wt.q.05_peak_12450	chr13	80827069	80827886
2_wt.q.05_peak_46006	chrX	69441690	69442058
2_wt.q.05_peak_3756	chr10	13973370	13974356
2_wt.q.05_peak_36752	chr6	55803488	55805965
2_wt.q.05_peak_15016	chr14	101837992	101838662
2_wt.q.05_peak_30995	chr4	36183498	36184125
2_wt.q.05_peak_38177	chr6	135904295	135904688
2_wt.q.05_peak_41761	chr8	54163405	54164057
2_wt.q.05_peak_2684	chr1	159614950	159615421
2_wt.q.05_peak_9842	chr12	65259488	65259890
2_wt.q.05_peak_14925	chr14	93083958	93085012
2_wt.q.05_peak_28394	chr3	51708479	51708963
2_wt.q.05_peak_30929	chr4	32414868	32415547
2_wt.q.05_peak_24252	chr2	12708494	12710417
2_wt.q.05_peak_23473	chr19	38187186	38187691
2_wt.q.05_peak_21634	chr18	37148824	37150278
2_wt.q.05_peak_1776	chr1	105946874	105947193
2_wt.q.05_peak_29535	chr3	107112859	107114018
2_wt.q.05_peak_323	chr1	25033636	25034349
2_wt.q.05_peak_20344	chr17	62656934	62657373
2_wt.q.05_peak_10480	chr12	91765240	91765554
2_wt.q.05_peak_15238	chr14	117895310	117896153
2_wt.q.05_peak_28377	chr3	51234162	51234682
2_wt.q.05_peak_45405	chr9	110206024	110207276
2_wt.q.05_peak_31913	chr4	98055001	98055562
2_wt.q.05_peak_6293	chr11	17655699	17656400
2_wt.q.05_peak_39736	chr7	89035034	89035620
2_wt.q.05_peak_31288	chr4	54966033	54966563
2_wt.q.05_peak_31790	chr4	87954769	87955584
2_wt.q.05_peak_30906	chr4	28913276	28914462
2_wt.q.05_peak_15579	chr15	13288211	13289338
2_wt.q.05_peak_28250	chr3	38906603	38906933
2_wt.q.05_peak_23072	chr19	16179319	16180398
2_wt.q.05_peak_31509	chr4	72469199	72469732
2_wt.q.05_peak_42035	chr8	68838438	68839609
2_wt.q.05_peak_5440	chr10	100867401	100868185
2_wt.q.05_peak_9861	chr12	66640326	66640596
2_wt.q.05_peak_35784	chr5	149334319	149336286
2_wt.q.05_peak_27870	chr3	10684903	10686082
2_wt.q.05_peak_15967	chr15	37438563	37439100
2_wt.q.05_peak_10203	chr12	80798563	80798835
2_wt.q.05_peak_29000	chr3	84962477	84964219
2_wt.q.05_peak_12311	chr13	70159374	70159702
2_wt.q.05_peak_37417	chr6	98999290	99000143
2_wt.q.05_peak_6682	chr11	37153903	37154769
2_wt.q.05_peak_35299	chr5	125675787	125676386
2_wt.q.05_peak_345	chr1	25435640	25435944
2_wt.q.05_peak_24137	chr2	7254578	7256913
2_wt.q.05_peak_23137	chr19	21135651	21136142
2_wt.q.05_peak_41601	chr8	41303559	41304154
2_wt.q.05_peak_20754	chr17	81319639	81320079
2_wt.q.05_peak_38289	chr6	140514340	140515495
2_wt.q.05_peak_40085	chr7	101191214	101191720
2_wt.q.05_peak_19482	chr17	9905934	9906655
2_wt.q.05_peak_24893	chr2	43786778	43787423
2_wt.q.05_peak_28721	chr3	69399621	69400161
2_wt.q.05_peak_25929	chr2	91956859	91957269
2_wt.q.05_peak_36681	chr6	51857871	51858267
2_wt.q.05_peak_10274	chr12	82670069	82670886
2_wt.q.05_peak_34126	chr5	63325591	63327218
2_wt.q.05_peak_44774	chr9	77469660	77470202
2_wt.q.05_peak_1664	chr1	95341893	95342968
2_wt.q.05_peak_15784	chr15	27901483	27901800
2_wt.q.05_peak_14386	chr14	64255956	64256452
2_wt.q.05_peak_44521	chr9	66305026	66306183
2_wt.q.05_peak_31581	chr4	78389459	78389914
2_wt.q.05_peak_38178	chr6	135906556	135909251
2_wt.q.05_peak_45035	chr9	95852713	95853391
2_wt.q.05_peak_22049	chr18	57777800	57778920
2_wt.q.05_peak_22029	chr18	56287856	56288551
2_wt.q.05_peak_33785	chr5	36885698	36885999
2_wt.q.05_peak_24193	chr2	8092178	8092913
2_wt.q.05_peak_15925	chr15	36016067	36016852
2_wt.q.05_peak_11306	chr13	18810267	18810681
2_wt.q.05_peak_5919	chr10	123155896	123156830
2_wt.q.05_peak_10981	chr12	117345134	117346135
2_wt.q.05_peak_23848	chr19	56709842	56711265
2_wt.q.05_peak_5931	chr10	123839666	123840529
2_wt.q.05_peak_1986	chr1	128140016	128145546
2_wt.q.05_peak_5744	chr10	112572336	112573377
2_wt.q.05_peak_30927	chr4	32304141	32305536
2_wt.q.05_peak_37772	chr6	113934746	113935829
2_wt.q.05_peak_15689	chr15	25019043	25020027
2_wt.q.05_peak_10012	chr12	72285145	72286409
2_wt.q.05_peak_10616	chr12	99407087	99407389
2_wt.q.05_peak_24554	chr2	29385008	29385826
2_wt.q.05_peak_4626	chr10	67076307	67076595
2_wt.q.05_peak_44374	chr9	60456579	60457228
2_wt.q.05_peak_44378	chr9	60647913	60650271

## Sheet: MYT1L_Poised_to_Active_Enhancer
PeakID	Chr	Start	End
2_wt.q.05_peak_30254	chr3	144018959	144019870
2_wt.q.05_peak_1748	chr1	104226134	104227764
2_wt.q.05_peak_42007	chr8	67877637	67878750
2_wt.q.05_peak_1273	chr1	74824530	74825895
2_wt.q.05_peak_43651	chr9	32215733	32217782
2_wt.q.05_peak_32149	chr4	110201061	110201608
2_wt.q.05_peak_39286	chr7	64160196	64161011
2_wt.q.05_peak_9517	chr12	41877550	41878067
2_wt.q.05_peak_36712	chr6	54461195	54461907
2_wt.q.05_peak_37350	chr6	94271704	94272779
2_wt.q.05_peak_18174	chr16	31290196	31290923
2_wt.q.05_peak_18449	chr16	38874330	38875213
2_wt.q.05_peak_12093	chr13	58090850	58091266
2_wt.q.05_peak_19294	chr16	95802557	95803184
2_wt.q.05_peak_15417	chr14	124634779	124635610
2_wt.q.05_peak_33797	chr5	37177008	37177858
2_wt.q.05_peak_32285	chr4	119880994	119882124
2_wt.q.05_peak_23720	chr19	48097698	48098460
2_wt.q.05_peak_28722	chr3	69438519	69440074
2_wt.q.05_peak_21455	chr18	31826829	31827653
2_wt.q.05_peak_13219	chr13	110008514	110009029
2_wt.q.05_peak_26050	chr2	97581013	97581299
2_wt.q.05_peak_5480	chr10	106760930	106761855
2_wt.q.05_peak_10409	chr12	87329879	87331012
2_wt.q.05_peak_3392	chr1	189960208	189961130
2_wt.q.05_peak_12625	chr13	86005177	86005679
2_wt.q.05_peak_13260	chr13	110881602	110883342
2_wt.q.05_peak_30516	chr3	158886188	158886831
2_wt.q.05_peak_22245	chr18	65093300	65093781
2_wt.q.05_peak_44019	chr9	47738822	47740079
2_wt.q.05_peak_41887	chr8	61210491	61211362
2_wt.q.05_peak_45543	chr9	113081176	113081650
2_wt.q.05_peak_40588	chr7	124907559	124907990
2_wt.q.05_peak_29937	chr3	127369283	127370308
2_wt.q.05_peak_43589	chr9	29317526	29318435
2_wt.q.05_peak_25219	chr2	60863736	60864508
2_wt.q.05_peak_28327	chr3	45402364	45404080
2_wt.q.05_peak_12393	chr13	76844583	76845664
2_wt.q.05_peak_22084	chr18	59432721	59433974
2_wt.q.05_peak_43737	chr9	37518829	37519448
2_wt.q.05_peak_4328	chr10	43322319	43322992
2_wt.q.05_peak_2690	chr1	159716573	159718207
2_wt.q.05_peak_32408	chr4	125396957	125397341
2_wt.q.05_peak_27076	chr2	142812743	142813584
2_wt.q.05_peak_1006	chr1	58568248	58569260
2_wt.q.05_peak_35986	chr6	16572822	16573862
2_wt.q.05_peak_36051	chr6	18654123	18654992
2_wt.q.05_peak_12490	chr13	82424815	82425165
2_wt.q.05_peak_291	chr1	23953496	23953931
2_wt.q.05_peak_28326	chr3	45400030	45401836
2_wt.q.05_peak_17029	chr15	83989493	83990102
2_wt.q.05_peak_13115	chr13	105044003	105044273
2_wt.q.05_peak_31336	chr4	58400748	58402595
2_wt.q.05_peak_15352	chr14	121168672	121169035
2_wt.q.05_peak_5057	chr10	85161143	85162227
2_wt.q.05_peak_28175	chr3	33741770	33743224
2_wt.q.05_peak_10967	chr12	117026973	117027241
2_wt.q.05_peak_23196	chr19	23162286	23162749
2_wt.q.05_peak_19612	chr17	17498871	17499510
2_wt.q.05_peak_44447	chr9	63632399	63633694
2_wt.q.05_peak_13515	chr14	13590316	13592525
2_wt.q.05_peak_38390	chr6	146958516	146959258
2_wt.q.05_peak_28831	chr3	79435924	79436929
2_wt.q.05_peak_5948	chr10	125839796	125840778
2_wt.q.05_peak_24170	chr2	7733635	7735801
2_wt.q.05_peak_35799	chr5	149560972	149562057
2_wt.q.05_peak_18630	chr16	49812948	49813618
2_wt.q.05_peak_46390	chrX	167146871	167147231
2_wt.q.05_peak_19079	chr16	83422622	83423747
2_wt.q.05_peak_44637	chr9	71018049	71018477
2_wt.q.05_peak_23146	chr19	21476846	21478623
2_wt.q.05_peak_23049	chr19	14484656	14485454
2_wt.q.05_peak_16026	chr15	38931308	38932536
2_wt.q.05_peak_9789	chr12	59259940	59260993
2_wt.q.05_peak_27087	chr2	143113782	143114769
2_wt.q.05_peak_15364	chr14	121566663	121567748
2_wt.q.05_peak_44251	chr9	56712022	56712627
2_wt.q.05_peak_15845	chr15	31329576	31330949
2_wt.q.05_peak_607	chr1	39338766	39340575
2_wt.q.05_peak_26718	chr2	129654490	129655542
2_wt.q.05_peak_5140	chr10	90607312	90608172
2_wt.q.05_peak_28828	chr3	79313710	79314689
2_wt.q.05_peak_5405	chr10	99450997	99452182
2_wt.q.05_peak_43070	chr8	124392674	124393183
2_wt.q.05_peak_33802	chr5	37251986	37252685
2_wt.q.05_peak_11352	chr13	20537781	20540295
2_wt.q.05_peak_23097	chr19	18020577	18020849
2_wt.q.05_peak_36408	chr6	36842902	36845007
2_wt.q.05_peak_13577	chr14	18061733	18063295
2_wt.q.05_peak_28313	chr3	42905837	42906654
2_wt.q.05_peak_44481	chr9	65036810	65037499
2_wt.q.05_peak_12322	chr13	70713942	70714876
2_wt.q.05_peak_11300	chr13	18457010	18457317
2_wt.q.05_peak_44024	chr9	47761584	47761890
2_wt.q.05_peak_41792	chr8	54863998	54864993
2_wt.q.05_peak_1200	chr1	67033666	67034299
2_wt.q.05_peak_34666	chr5	99354591	99355354
2_wt.q.05_peak_14817	chr14	78678122	78678433
2_wt.q.05_peak_45208	chr9	105275213	105275856
2_wt.q.05_peak_30339	chr3	149223553	149224586
2_wt.q.05_peak_16127	chr15	42429533	42430668
2_wt.q.05_peak_12320	chr13	70675112	70675758
2_wt.q.05_peak_29016	chr3	85024990	85025655
2_wt.q.05_peak_1162	chr1	66205403	66206039
2_wt.q.05_peak_877	chr1	53823140	53824630
2_wt.q.05_peak_19110	chr16	85487501	85488093
2_wt.q.05_peak_28941	chr3	82051483	82052058
2_wt.q.05_peak_2605	chr1	157248029	157249000
2_wt.q.05_peak_15307	chr14	120374202	120375312
2_wt.q.05_peak_22969	chr19	9966742	9967058
2_wt.q.05_peak_14566	chr14	68973789	68974665
2_wt.q.05_peak_11123	chr13	9450012	9451788
2_wt.q.05_peak_42344	chr8	84458844	84460276
2_wt.q.05_peak_23147	chr19	21479454	21480367
2_wt.q.05_peak_299	chr1	24107407	24108439
2_wt.q.05_peak_22080	chr18	59358862	59359788
2_wt.q.05_peak_17661	chr16	7419320	7420230
2_wt.q.05_peak_20980	chr17	90904421	90905258
2_wt.q.05_peak_9702	chr12	52818465	52819241
2_wt.q.05_peak_20527	chr17	70442641	70443780
2_wt.q.05_peak_39348	chr7	65639316	65640592
2_wt.q.05_peak_1809	chr1	107728420	107728887
2_wt.q.05_peak_2232	chr1	137664318	137665464
2_wt.q.05_peak_27565	chr2	164994897	164995245
2_wt.q.05_peak_29026	chr3	85188117	85189703
2_wt.q.05_peak_4635	chr10	67196844	67197985
2_wt.q.05_peak_26441	chr2	117145342	117146730
2_wt.q.05_peak_35952	chr6	13746254	13747679
2_wt.q.05_peak_33862	chr5	42271005	42271283
2_wt.q.05_peak_27165	chr2	145683783	145684775
2_wt.q.05_peak_18819	chr16	65214336	65214828
2_wt.q.05_peak_25011	chr2	46365383	46366798
2_wt.q.05_peak_5535	chr10	108558297	108559541
2_wt.q.05_peak_29043	chr3	85378755	85379905
2_wt.q.05_peak_19462	chr17	8652812	8653388
2_wt.q.05_peak_11623	chr13	36531753	36533717
2_wt.q.05_peak_6335	chr11	21016617	21016968
2_wt.q.05_peak_13046	chr13	102533408	102533865
2_wt.q.05_peak_26433	chr2	117017081	117019398
2_wt.q.05_peak_20981	chr17	90905619	90905890
2_wt.q.05_peak_1370	chr1	79336964	79337437
2_wt.q.05_peak_21739	chr18	39908727	39909343
2_wt.q.05_peak_24012	chr2	5610240	5610862
2_wt.q.05_peak_5230	chr10	93227472	93228580
2_wt.q.05_peak_1681	chr1	97636989	97637810
2_wt.q.05_peak_31149	chr4	46061141	46062107
2_wt.q.05_peak_35338	chr5	128204841	128205648
2_wt.q.05_peak_25103	chr2	52938741	52939000
2_wt.q.05_peak_43991	chr9	46082121	46082831
2_wt.q.05_peak_18938	chr16	73784502	73784771
2_wt.q.05_peak_919	chr1	55399656	55400312
2_wt.q.05_peak_39302	chr7	64631321	64632121
2_wt.q.05_peak_13063	chr13	103199434	103200637
2_wt.q.05_peak_13250	chr13	110651131	110652322
2_wt.q.05_peak_528	chr1	37350897	37352104
2_wt.q.05_peak_13995	chr14	38546324	38547491
2_wt.q.05_peak_30833	chr4	25012481	25013287
2_wt.q.05_peak_20255	chr17	54753013	54753581
2_wt.q.05_peak_39511	chr7	78027032	78027439
2_wt.q.05_peak_29037	chr3	85314131	85314443
2_wt.q.05_peak_20192	chr17	49029949	49030504
2_wt.q.05_peak_2275	chr1	140294384	140296534
2_wt.q.05_peak_12016	chr13	54752503	54752776
2_wt.q.05_peak_17658	chr16	7279367	7279975
2_wt.q.05_peak_23737	chr19	49681043	49681607
2_wt.q.05_peak_16214	chr15	47990904	47991169
2_wt.q.05_peak_30027	chr3	134014350	134014781
2_wt.q.05_peak_29683	chr3	116940478	116941280
2_wt.q.05_peak_24516	chr2	27901391	27901944
2_wt.q.05_peak_43297	chr9	16039796	16040670
2_wt.q.05_peak_21779	chr18	41192525	41193943
2_wt.q.05_peak_33219	chr5	9540761	9541497
2_wt.q.05_peak_43757	chr9	37674652	37675417
2_wt.q.05_peak_10513	chr12	94644945	94645484
2_wt.q.05_peak_9642	chr12	50564994	50565279
2_wt.q.05_peak_32657	chr4	133378665	133379106
2_wt.q.05_peak_6858	chr11	46313974	46315077
2_wt.q.05_peak_34337	chr5	73875539	73876230
2_wt.q.05_peak_40379	chr7	117259436	117260697
2_wt.q.05_peak_37306	chr6	92569028	92569836
2_wt.q.05_peak_43587	chr9	29296402	29296925
2_wt.q.05_peak_22668	chr18	84914910	84915334
2_wt.q.05_peak_17017	chr15	83417340	83418347
2_wt.q.05_peak_5667	chr10	110342008	110343528
2_wt.q.05_peak_43738	chr9	37519788	37520486
2_wt.q.05_peak_26906	chr2	135676517	135677550
2_wt.q.05_peak_43744	chr9	37567534	37569504
2_wt.q.05_peak_4692	chr10	69576705	69577896
2_wt.q.05_peak_31406	chr4	65975767	65977734
2_wt.q.05_peak_17178	chr15	91440195	91440927
2_wt.q.05_peak_44584	chr9	68866183	68867125
2_wt.q.05_peak_10460	chr12	89701335	89701718
2_wt.q.05_peak_25081	chr2	52495300	52495671
2_wt.q.05_peak_37316	chr6	92663219	92664293
2_wt.q.05_peak_8622	chr11	113334332	113335852
2_wt.q.05_peak_39799	chr7	91045221	91046037
2_wt.q.05_peak_16269	chr15	52740391	52741558
2_wt.q.05_peak_6241	chr11	12811102	12812066
2_wt.q.05_peak_41778	chr8	54594306	54595407
2_wt.q.05_peak_29023	chr3	85159818	85160223
2_wt.q.05_peak_34700	chr5	100643547	100644421
2_wt.q.05_peak_33537	chr5	25085084	25086082
2_wt.q.05_peak_28334	chr3	45658288	45659601
2_wt.q.05_peak_4217	chr10	40448534	40448892
2_wt.q.05_peak_5438	chr10	100795483	100796032
2_wt.q.05_peak_10420	chr12	88738426	88739285
2_wt.q.05_peak_25737	chr2	80592513	80593175
2_wt.q.05_peak_16110	chr15	41641627	41643034
2_wt.q.05_peak_12321	chr13	70676563	70677256
2_wt.q.05_peak_1546	chr1	87708667	87709613
2_wt.q.05_peak_37069	chr6	84442578	84443168
2_wt.q.05_peak_22315	chr18	67577378	67579118
2_wt.q.05_peak_31535	chr4	76192094	76192525
2_wt.q.05_peak_13445	chr14	10166619	10167180
2_wt.q.05_peak_12120	chr13	58934467	58935365
2_wt.q.05_peak_41039	chr8	10539348	10539661
2_wt.q.05_peak_22669	chr18	84945514	84947016
2_wt.q.05_peak_23395	chr19	34230720	34232234
2_wt.q.05_peak_15574	chr15	13136261	13136637
2_wt.q.05_peak_2829	chr1	165119890	165120410
2_wt.q.05_peak_41839	chr8	57569160	57570493
2_wt.q.05_peak_25280	chr2	62680887	62682187
2_wt.q.05_peak_29497	chr3	105281217	105282156
2_wt.q.05_peak_29397	chr3	98417327	98417866
2_wt.q.05_peak_8579	chr11	110330032	110330440
2_wt.q.05_peak_8195	chr11	99120853	99121535
2_wt.q.05_peak_42648	chr8	101781869	101782462
2_wt.q.05_peak_30310	chr3	146598027	146600421
2_wt.q.05_peak_399	chr1	29182475	29183500
2_wt.q.05_peak_15922	chr15	35862041	35863034
2_wt.q.05_peak_6586	chr11	31899787	31900453
2_wt.q.05_peak_30258	chr3	144192145	144192913
2_wt.q.05_peak_12546	chr13	83609218	83610879
2_wt.q.05_peak_11808	chr13	45049184	45050082
2_wt.q.05_peak_30081	chr3	136766346	136766786
2_wt.q.05_peak_4622	chr10	66853143	66853788
2_wt.q.05_peak_12544	chr13	83602280	83605042
2_wt.q.05_peak_25838	chr2	90504667	90505255
2_wt.q.05_peak_30244	chr3	143613637	143614916
2_wt.q.05_peak_43703	chr9	36906823	36907662
2_wt.q.05_peak_5198	chr10	91612147	91612592
2_wt.q.05_peak_43746	chr9	37575433	37576614
2_wt.q.05_peak_38076	chr6	127661449	127662667
2_wt.q.05_peak_33389	chr5	20578719	20579426
2_wt.q.05_peak_37404	chr6	98287774	98288830
2_wt.q.05_peak_13049	chr13	102744622	102746267
2_wt.q.05_peak_17460	chr15	100832199	100833383
2_wt.q.05_peak_44848	chr9	83042678	83043294
2_wt.q.05_peak_26299	chr2	110927806	110929050
2_wt.q.05_peak_27843	chr3	8995923	8996339
2_wt.q.05_peak_11621	chr13	36503774	36507353
2_wt.q.05_peak_36570	chr6	43296941	43297699
2_wt.q.05_peak_36857	chr6	65584694	65585555
2_wt.q.05_peak_31178	chr4	46829086	46829664
2_wt.q.05_peak_14246	chr14	57528878	57529717
2_wt.q.05_peak_42214	chr8	76970348	76970727
2_wt.q.05_peak_37313	chr6	92609263	92611814
2_wt.q.05_peak_3970	chr10	24989651	24990558
2_wt.q.05_peak_12298	chr13	69713039	69713958
2_wt.q.05_peak_30342	chr3	149258644	149259208
2_wt.q.05_peak_41888	chr8	61217328	61217685
2_wt.q.05_peak_45721	chr9	121555391	121556241
2_wt.q.05_peak_43068	chr8	124389770	124390110
2_wt.q.05_peak_5571	chr10	108743510	108745247
2_wt.q.05_peak_31733	chr4	85728143	85728846
2_wt.q.05_peak_26108	chr2	102256148	102257055
2_wt.q.05_peak_10273	chr12	82664108	82665344
2_wt.q.05_peak_12090	chr13	58068210	58068610
2_wt.q.05_peak_16481	chr15	64562323	64563232
2_wt.q.05_peak_39832	chr7	91382281	91382911
2_wt.q.05_peak_39656	chr7	83016029	83016657
2_wt.q.05_peak_44835	chr9	82854480	82856981
2_wt.q.05_peak_12091	chr13	58073212	58073747
2_wt.q.05_peak_31442	chr4	68905880	68907173
2_wt.q.05_peak_26020	chr2	96401146	96402344
2_wt.q.05_peak_20822	chr17	85949049	85949535
2_wt.q.05_peak_12882	chr13	97492522	97493829
2_wt.q.05_peak_19613	chr17	17591318	17592193
2_wt.q.05_peak_41874	chr8	60773105	60774099
2_wt.q.05_peak_25025	chr2	48624059	48624801
2_wt.q.05_peak_4588	chr10	63946936	63948148
2_wt.q.05_peak_21295	chr18	22875628	22876373
2_wt.q.05_peak_5682	chr10	110477497	110478123
2_wt.q.05_peak_42665	chr8	102753851	102754386
2_wt.q.05_peak_604	chr1	39311879	39312441
2_wt.q.05_peak_1977	chr1	128076968	128078722
2_wt.q.05_peak_28070	chr3	27656898	27657378
2_wt.q.05_peak_27533	chr2	163674909	163675894
2_wt.q.05_peak_39119	chr7	49762512	49763243
2_wt.q.05_peak_30243	chr3	143597216	143597957
2_wt.q.05_peak_19371	chr17	4378352	4379425
2_wt.q.05_peak_13220	chr13	110010701	110011337
2_wt.q.05_peak_38330	chr6	144074889	144077247
2_wt.q.05_peak_14939	chr14	93623907	93625223
2_wt.q.05_peak_10368	chr12	85979980	85980459
2_wt.q.05_peak_6667	chr11	36107704	36108341
2_wt.q.05_peak_7882	chr11	87283609	87284353
2_wt.q.05_peak_8634	chr11	113926905	113928577
2_wt.q.05_peak_36050	chr6	18651774	18652383
2_wt.q.05_peak_6838	chr11	45975431	45976442
2_wt.q.05_peak_39923	chr7	95761000	95761863
2_wt.q.05_peak_26039	chr2	97414182	97414962
2_wt.q.05_peak_4416	chr10	53414027	53414739
2_wt.q.05_peak_42652	chr8	102000114	102001457
2_wt.q.05_peak_18067	chr16	25313847	25315207
2_wt.q.05_peak_13833	chr14	28243032	28244186
2_wt.q.05_peak_25380	chr2	67486677	67487279
2_wt.q.05_peak_31254	chr4	52341012	52342325
2_wt.q.05_peak_6520	chr11	29744246	29744655
2_wt.q.05_peak_43707	chr9	36941764	36942273
2_wt.q.05_peak_9576	chr12	45933893	45934250
2_wt.q.05_peak_3505	chr1	193751718	193752929
2_wt.q.05_peak_16247	chr15	51392259	51392948
2_wt.q.05_peak_30773	chr4	19499114	19499655
2_wt.q.05_peak_7480	chr11	74526401	74527845
2_wt.q.05_peak_30960	chr4	33686104	33686587
2_wt.q.05_peak_927	chr1	55558557	55559221
2_wt.q.05_peak_10555	chr12	97310629	97310992
2_wt.q.05_peak_13720	chr14	23786143	23787273
2_wt.q.05_peak_16448	chr15	64012247	64012919
2_wt.q.05_peak_16056	chr15	39819085	39820110
2_wt.q.05_peak_34092	chr5	58082243	58082885
2_wt.q.05_peak_14500	chr14	66306553	66307731
2_wt.q.05_peak_41237	chr8	18268088	18269018
2_wt.q.05_peak_6481	chr11	26981990	26983337
2_wt.q.05_peak_5782	chr10	116107988	116109268
2_wt.q.05_peak_44882	chr9	85410401	85411190
2_wt.q.05_peak_42592	chr8	95687969	95689130
2_wt.q.05_peak_33863	chr5	42271561	42272684
2_wt.q.05_peak_34649	chr5	98776719	98777321
2_wt.q.05_peak_13556	chr14	16741178	16741729
2_wt.q.05_peak_44488	chr9	65404419	65404827
2_wt.q.05_peak_37214	chr6	89553651	89554117
2_wt.q.05_peak_44252	chr9	56712900	56713284
2_wt.q.05_peak_1204	chr1	67795425	67795921
2_wt.q.05_peak_39155	chr7	55189559	55190101
2_wt.q.05_peak_17303	chr15	95886757	95887847
2_wt.q.05_peak_17035	chr15	84078206	84078921
2_wt.q.05_peak_45198	chr9	104776383	104777224
2_wt.q.05_peak_13516	chr14	13593202	13593851
2_wt.q.05_peak_16374	chr15	58343925	58344567
2_wt.q.05_peak_40603	chr7	125984157	125984547
2_wt.q.05_peak_1160	chr1	66192630	66193785
2_wt.q.05_peak_45577	chr9	113645325	113646346
2_wt.q.05_peak_1109	chr1	64079508	64081361
2_wt.q.05_peak_30574	chr4	6375351	6377054
2_wt.q.05_peak_21128	chr18	10404860	10405532
2_wt.q.05_peak_42943	chr8	119020804	119021604
2_wt.q.05_peak_3802	chr10	15868037	15868657
2_wt.q.05_peak_38389	chr6	146956473	146957644
2_wt.q.05_peak_40093	chr7	101414097	101415302
2_wt.q.05_peak_14494	chr14	66263017	66263470
2_wt.q.05_peak_9585	chr12	46247272	46247744
2_wt.q.05_peak_30201	chr3	141618470	141618759
2_wt.q.05_peak_36351	chr6	33828525	33829187
2_wt.q.05_peak_17256	chr15	94775591	94777110
2_wt.q.05_peak_6870	chr11	47705391	47706475
2_wt.q.05_peak_35065	chr5	118716431	118716747
2_wt.q.05_peak_22624	chr18	82493569	82494326
2_wt.q.05_peak_14538	chr14	67085071	67086156
2_wt.q.05_peak_14451	chr14	65086157	65086825
2_wt.q.05_peak_27115	chr2	143678162	143678588
2_wt.q.05_peak_28301	chr3	42218429	42219108
2_wt.q.05_peak_20926	chr17	89864783	89865437
2_wt.q.05_peak_20450	chr17	66349813	66350956
2_wt.q.05_peak_27091	chr2	143217660	143218887
2_wt.q.05_peak_14774	chr14	77214562	77215224
2_wt.q.05_peak_1089	chr1	63573590	63575132
2_wt.q.05_peak_41989	chr8	67713660	67715116
2_wt.q.05_peak_14756	chr14	76777952	76779274
2_wt.q.05_peak_38173	chr6	135866275	135866791
2_wt.q.05_peak_35758	chr5	148130700	148131859
2_wt.q.05_peak_31321	chr4	57228897	57230683
2_wt.q.05_peak_786	chr1	50948316	50949208
2_wt.q.05_peak_26672	chr2	127498978	127499474
2_wt.q.05_peak_40922	chr7	144251085	144251422
2_wt.q.05_peak_35188	chr5	123326540	123327358
2_wt.q.05_peak_18412	chr16	37704821	37705545
2_wt.q.05_peak_15674	chr15	23378183	23378950
2_wt.q.05_peak_23130	chr19	20540861	20543459
2_wt.q.05_peak_41876	chr8	60867286	60867982
2_wt.q.05_peak_2341	chr1	143939564	143940082
2_wt.q.05_peak_3145	chr1	177031035	177031517
2_wt.q.05_peak_11989	chr13	54257451	54258070
2_wt.q.05_peak_10977	chr12	117229294	117230227
2_wt.q.05_peak_15036	chr14	102934715	102935783
2_wt.q.05_peak_13853	chr14	29669697	29670190
2_wt.q.05_peak_36420	chr6	37096476	37097987
2_wt.q.05_peak_2147	chr1	134638271	134638606
2_wt.q.05_peak_6658	chr11	35902402	35903606
2_wt.q.05_peak_225	chr1	21535270	21535792
2_wt.q.05_peak_2728	chr1	160587932	160589068
2_wt.q.05_peak_16246	chr15	51391599	51391970
2_wt.q.05_peak_43434	chr9	25132542	25133291
2_wt.q.05_peak_44890	chr9	86031022	86031695
2_wt.q.05_peak_4423	chr10	53978571	53979030
2_wt.q.05_peak_4236	chr10	40774199	40775617
2_wt.q.05_peak_42270	chr8	81360055	81361455
2_wt.q.05_peak_30242	chr3	143594242	143595521
2_wt.q.05_peak_43992	chr9	46083901	46084559
2_wt.q.05_peak_22111	chr18	60632432	60633506
2_wt.q.05_peak_18353	chr16	35431492	35432110
2_wt.q.05_peak_24027	chr2	6366632	6367638
2_wt.q.05_peak_34619	chr5	97554234	97555035
2_wt.q.05_peak_45199	chr9	104777598	104777876
2_wt.q.05_peak_36413	chr6	36981464	36982003
2_wt.q.05_peak_18027	chr16	22491608	22492504
2_wt.q.05_peak_41747	chr8	50276323	50276589
2_wt.q.05_peak_3335	chr1	184969289	184969877
2_wt.q.05_peak_31714	chr4	85272183	85273919
2_wt.q.05_peak_5644	chr10	109712946	109713404
2_wt.q.05_peak_44834	chr9	82853842	82854185
2_wt.q.05_peak_44991	chr9	94302095	94303086
2_wt.q.05_peak_22964	chr19	9066187	9066859
2_wt.q.05_peak_20741	chr17	80939395	80940786
2_wt.q.05_peak_44101	chr9	50966642	50967467
2_wt.q.05_peak_1672	chr1	97554682	97555800
2_wt.q.05_peak_4282	chr10	41883827	41884492
2_wt.q.05_peak_24391	chr2	20402941	20403837
2_wt.q.05_peak_18480	chr16	40972159	40972917
2_wt.q.05_peak_28410	chr3	52342530	52342988
2_wt.q.05_peak_23579	chr19	44229845	44230731
2_wt.q.05_peak_15654	chr15	21179437	21180343
2_wt.q.05_peak_15371	chr14	121617568	121618509
2_wt.q.05_peak_31703	chr4	85050825	85051287
2_wt.q.05_peak_44675	chr9	72834929	72836185
2_wt.q.05_peak_23747	chr19	50419193	50419731
2_wt.q.05_peak_22185	chr18	62206154	62207006
2_wt.q.05_peak_16191	chr15	45016446	45019007
2_wt.q.05_peak_9556	chr12	44524528	44524895
2_wt.q.05_peak_13328	chr13	114101007	114102197
2_wt.q.05_peak_5149	chr10	90672369	90672890
2_wt.q.05_peak_19500	chr17	11155847	11158442
2_wt.q.05_peak_30231	chr3	143283216	143284539
2_wt.q.05_peak_45906	chrX	36749055	36749428
2_wt.q.05_peak_38391	chr6	146959829	146960916
2_wt.q.05_peak_29483	chr3	104295141	104296064
2_wt.q.05_peak_23833	chr19	56422723	56423925
2_wt.q.05_peak_27838	chr3	8851074	8851522
2_wt.q.05_peak_16265	chr15	52565253	52566121
2_wt.q.05_peak_11261	chr13	16348425	16349423
2_wt.q.05_peak_36395	chr6	36608284	36609142
2_wt.q.05_peak_30550	chr4	5327114	5327991
2_wt.q.05_peak_3807	chr10	16171525	16171848
2_wt.q.05_peak_30077	chr3	136714344	136715182
2_wt.q.05_peak_21406	chr18	27296552	27297440
2_wt.q.05_peak_16611	chr15	68995002	68995642
2_wt.q.05_peak_37634	chr6	108434392	108437174
2_wt.q.05_peak_20742	chr17	80941466	80942505
2_wt.q.05_peak_33369	chr5	20302656	20304141
2_wt.q.05_peak_3170	chr1	177347004	177347966
2_wt.q.05_peak_26857	chr2	132860405	132861572
2_wt.q.05_peak_4029	chr10	28067910	28068917
2_wt.q.05_peak_10102	chr12	75573008	75573615
2_wt.q.05_peak_26499	chr2	119600870	119601825
2_wt.q.05_peak_11098	chr13	8056312	8056651
2_wt.q.05_peak_35913	chr6	8900019	8900834
2_wt.q.05_peak_26964	chr2	136781199	136782472
2_wt.q.05_peak_29893	chr3	126920654	126920925
2_wt.q.05_peak_28514	chr3	55740477	55741115
2_wt.q.05_peak_28188	chr3	34231669	34231995
2_wt.q.05_peak_33426	chr5	21434100	21434555
2_wt.q.05_peak_45221	chr9	105475969	105476792
2_wt.q.05_peak_44990	chr9	94300819	94301816
2_wt.q.05_peak_16114	chr15	41677512	41678040
2_wt.q.05_peak_36417	chr6	37037203	37037804
2_wt.q.05_peak_38209	chr6	136241301	136242254
2_wt.q.05_peak_28431	chr3	53164721	53165178
2_wt.q.05_peak_41763	chr8	54228712	54229601
2_wt.q.05_peak_23709	chr19	47542936	47543382
2_wt.q.05_peak_2356	chr1	144883327	144883751
2_wt.q.05_peak_44052	chr9	48795426	48795911
2_wt.q.05_peak_41945	chr8	65420695	65421325
2_wt.q.05_peak_5184	chr10	90964842	90966920
2_wt.q.05_peak_30438	chr3	155360352	155360899
2_wt.q.05_peak_32406	chr4	125191024	125192206
2_wt.q.05_peak_9174	chr12	24870456	24871699
2_wt.q.05_peak_44651	chr9	72196859	72197708
2_wt.q.05_peak_15986	chr15	37680595	37682173
2_wt.q.05_peak_9652	chr12	51058482	51059671
2_wt.q.05_peak_26464	chr2	117389522	117390938
2_wt.q.05_peak_1468	chr1	84386578	84386859
2_wt.q.05_peak_14629	chr14	72238049	72238585
2_wt.q.05_peak_17659	chr16	7282359	7283120
2_wt.q.05_peak_40958	chr8	4312636	4314377
2_wt.q.05_peak_19319	chr16	96740104	96740911
2_wt.q.05_peak_35566	chr5	139111717	139112633
2_wt.q.05_peak_9374	chr12	32961169	32961652
2_wt.q.05_peak_28699	chr3	68676589	68677748
2_wt.q.05_peak_13033	chr13	101719084	101719522
2_wt.q.05_peak_30056	chr3	135970011	135973263
2_wt.q.05_peak_3956	chr10	23090555	23091052
2_wt.q.05_peak_21764	chr18	40458394	40459660
2_wt.q.05_peak_25967	chr2	92672384	92673149
2_wt.q.05_peak_15889	chr15	34265123	34265984
2_wt.q.05_peak_12721	chr13	92973515	92974692
2_wt.q.05_peak_31609	chr4	80917692	80919424
2_wt.q.05_peak_28590	chr3	61358501	61359227
2_wt.q.05_peak_25145	chr2	55534953	55535940
2_wt.q.05_peak_2228	chr1	137584303	137584609
2_wt.q.05_peak_2123	chr1	133842129	133843208
2_wt.q.05_peak_42642	chr8	101097618	101097981
2_wt.q.05_peak_438	chr1	32625901	32626526
2_wt.q.05_peak_28042	chr3	26039450	26041001
2_wt.q.05_peak_43550	chr9	28218381	28218723
2_wt.q.05_peak_34525	chr5	89088301	89088984
2_wt.q.05_peak_39875	chr7	91934740	91936065
2_wt.q.05_peak_28718	chr3	69341995	69342858
2_wt.q.05_peak_14495	chr14	66264190	66264787
2_wt.q.05_peak_10974	chr12	117213943	117215221
2_wt.q.05_peak_15942	chr15	36739431	36740509
2_wt.q.05_peak_10646	chr12	100265673	100267071
2_wt.q.05_peak_1408	chr1	81098797	81099073
2_wt.q.05_peak_38184	chr6	135961813	135962559
2_wt.q.05_peak_21327	chr18	23851496	23851789
2_wt.q.05_peak_13712	chr14	23619828	23621574
2_wt.q.05_peak_41608	chr8	41562165	41562965
2_wt.q.05_peak_2378	chr1	146792716	146793426
2_wt.q.05_peak_2379	chr1	147412058	147412514
2_wt.q.05_peak_43644	chr9	32163050	32164852
2_wt.q.05_peak_29557	chr3	107686063	107686978
2_wt.q.05_peak_25406	chr2	68411995	68413100
2_wt.q.05_peak_22552	chr18	77308404	77309627
2_wt.q.05_peak_40601	chr7	125887530	125888652
2_wt.q.05_peak_10305	chr12	83785549	83786193
2_wt.q.05_peak_43505	chr9	27190618	27193453
2_wt.q.05_peak_4201	chr10	40069069	40070013
2_wt.q.05_peak_28324	chr3	45396746	45397631
2_wt.q.05_peak_5732	chr10	111884234	111884897
2_wt.q.05_peak_6835	chr11	45947286	45948101
2_wt.q.05_peak_28617	chr3	63941318	63942048
2_wt.q.05_peak_42640	chr8	100942855	100943610
2_wt.q.05_peak_45074	chr9	97974622	97975321
2_wt.q.05_peak_13562	chr14	17567827	17568791
2_wt.q.05_peak_27198	chr2	148160685	148163024
2_wt.q.05_peak_41044	chr8	10870186	10870976
2_wt.q.05_peak_4595	chr10	64048994	64050032
2_wt.q.05_peak_26240	chr2	107304318	107304768
2_wt.q.05_peak_21288	chr18	22417865	22419152
2_wt.q.05_peak_40734	chr7	131899245	131899798
2_wt.q.05_peak_18488	chr16	41276458	41276932
2_wt.q.05_peak_9969	chr12	70777851	70779318
2_wt.q.05_peak_5765	chr10	114871578	114871904
2_wt.q.05_peak_9205	chr12	26130537	26131631
2_wt.q.05_peak_45347	chr9	108205756	108206657
2_wt.q.05_peak_21080	chr18	6941378	6942512
2_wt.q.05_peak_16827	chr15	77366838	77367309
2_wt.q.05_peak_29641	chr3	110349324	110350161
2_wt.q.05_peak_10071	chr12	74303272	74303850
2_wt.q.05_peak_40528	chr7	122577143	122577550
2_wt.q.05_peak_5492	chr10	106958629	106959922
2_wt.q.05_peak_23125	chr19	20239091	20240657
2_wt.q.05_peak_11088	chr13	6626057	6626998
2_wt.q.05_peak_24864	chr2	42638269	42639482
2_wt.q.05_peak_45051	chr9	96689979	96690555
2_wt.q.05_peak_30182	chr3	139169453	139169859
2_wt.q.05_peak_30171	chr3	139003311	139003900
2_wt.q.05_peak_1435	chr1	83076406	83076728
2_wt.q.05_peak_13810	chr14	27797738	27799289
2_wt.q.05_peak_21312	chr18	23457038	23457876
2_wt.q.05_peak_23219	chr19	23866542	23868180
2_wt.q.05_peak_44906	chr9	86624346	86625103
2_wt.q.05_peak_42266	chr8	81068704	81069900
2_wt.q.05_peak_16274	chr15	52994299	52995130
2_wt.q.05_peak_21096	chr18	8327875	8328753
2_wt.q.05_peak_31390	chr4	64226411	64227360
2_wt.q.05_peak_7660	chr11	78804159	78804458
2_wt.q.05_peak_40026	chr7	99902460	99902926
2_wt.q.05_peak_2323	chr1	143503382	143504166
2_wt.q.05_peak_14985	chr14	99630841	99631746
2_wt.q.05_peak_31988	chr4	102351901	102352777
2_wt.q.05_peak_23516	chr19	41685596	41686027
2_wt.q.05_peak_20474	chr17	68264920	68266566
2_wt.q.05_peak_31189	chr4	47010283	47012097
2_wt.q.05_peak_4181	chr10	38908032	38908333
2_wt.q.05_peak_10047	chr12	74108135	74109111
2_wt.q.05_peak_27118	chr2	143685368	143686364
2_wt.q.05_peak_29867	chr3	124613124	124613913
2_wt.q.05_peak_20589	chr17	71129115	71130326
2_wt.q.05_peak_27811	chr3	5360777	5361139
2_wt.q.05_peak_44016	chr9	47717049	47718083
2_wt.q.05_peak_45623	chr9	115942317	115943800
2_wt.q.05_peak_11022	chr12	119463965	119464893
2_wt.q.05_peak_42220	chr8	77292347	77293374
2_wt.q.05_peak_39493	chr7	75294926	75295352
2_wt.q.05_peak_26120	chr2	102365141	102365819
2_wt.q.05_peak_33808	chr5	38063626	38064852
2_wt.q.05_peak_7792	chr11	84072376	84075251
2_wt.q.05_peak_18466	chr16	39675471	39676471
2_wt.q.05_peak_23361	chr19	32358779	32359329
2_wt.q.05_peak_45576	chr9	113632342	113633605
2_wt.q.05_peak_38161	chr6	135662324	135663367
2_wt.q.05_peak_27185	chr2	146355983	146357026
2_wt.q.05_peak_20761	chr17	81544842	81545589
2_wt.q.05_peak_1564	chr1	89050335	89050667
2_wt.q.05_peak_28966	chr3	82652179	82652663
2_wt.q.05_peak_33325	chr5	18338992	18339587
2_wt.q.05_peak_33360	chr5	20222275	20222656
2_wt.q.05_peak_11824	chr13	45614650	45615201
2_wt.q.05_peak_14359	chr14	63581334	63582027
2_wt.q.05_peak_11091	chr13	6633602	6634047
2_wt.q.05_peak_40517	chr7	122406406	122407045
2_wt.q.05_peak_30079	chr3	136732837	136734218
2_wt.q.05_peak_3096	chr1	175254641	175255293
2_wt.q.05_peak_12586	chr13	84399604	84399868
2_wt.q.05_peak_33874	chr5	43360193	43360724
2_wt.q.05_peak_15844	chr15	31328237	31328992
2_wt.q.05_peak_4317	chr10	43106638	43107488
2_wt.q.05_peak_37834	chr6	115493091	115493879
2_wt.q.05_peak_5633	chr10	109599484	109600390
2_wt.q.05_peak_11679	chr13	41446535	41447085
2_wt.q.05_peak_36188	chr6	28969227	28970386
2_wt.q.05_peak_20662	chr17	77888787	77889660
2_wt.q.05_peak_6460	chr11	26099544	26100379
2_wt.q.05_peak_14666	chr14	73759867	73760641
2_wt.q.05_peak_30845	chr4	25720290	25720751
2_wt.q.05_peak_9458	chr12	37889792	37890154
2_wt.q.05_peak_8351	chr11	103665834	103667141
2_wt.q.05_peak_1547	chr1	87732772	87734596
2_wt.q.05_peak_841	chr1	52280041	52281212
2_wt.q.05_peak_5562	chr10	108710005	108711477
2_wt.q.05_peak_1106	chr1	64055909	64056554
2_wt.q.05_peak_14874	chr14	86328853	86329307
2_wt.q.05_peak_39657	chr7	83061086	83061759
2_wt.q.05_peak_25738	chr2	80594299	80595287
2_wt.q.05_peak_21170	chr18	12812427	12812923
2_wt.q.05_peak_6296	chr11	19835063	19835871
2_wt.q.05_peak_14679	chr14	74252393	74253377
2_wt.q.05_peak_28338	chr3	46054650	46055364
2_wt.q.05_peak_39758	chr7	89628565	89629826
2_wt.q.05_peak_31181	chr4	46836855	46837882
2_wt.q.05_peak_9511	chr12	41394105	41394764
2_wt.q.05_peak_41620	chr8	41988852	41989707
2_wt.q.05_peak_25972	chr2	92697396	92697897
2_wt.q.05_peak_6334	chr11	21014417	21015044
2_wt.q.05_peak_35928	chr6	12073465	12074324
2_wt.q.05_peak_17210	chr15	92571169	92571647
2_wt.q.05_peak_26144	chr2	102742502	102743314
2_wt.q.05_peak_29024	chr3	85183965	85184689
2_wt.q.05_peak_29462	chr3	103600865	103601508
2_wt.q.05_peak_18766	chr16	62182614	62183517
2_wt.q.05_peak_42835	chr8	110938871	110939644
2_wt.q.05_peak_12958	chr13	99147437	99148416
2_wt.q.05_peak_42522	chr8	91558804	91559258
2_wt.q.05_peak_4680	chr10	68606673	68607498
2_wt.q.05_peak_19437	chr17	7152557	7153081
2_wt.q.05_peak_4886	chr10	78391005	78392505
2_wt.q.05_peak_6340	chr11	21101948	21102987
2_wt.q.05_peak_46296	chrX	157734480	157735454
2_wt.q.05_peak_34086	chr5	57868000	57868355
2_wt.q.05_peak_5539	chr10	108600515	108602616
2_wt.q.05_peak_5199	chr10	91613493	91614349
2_wt.q.05_peak_44464	chr9	64635918	64636604
2_wt.q.05_peak_28024	chr3	24787873	24789058
2_wt.q.05_peak_13723	chr14	23790876	23791779
2_wt.q.05_peak_12953	chr13	99063018	99063473
2_wt.q.05_peak_39694	chr7	84578583	84578894
2_wt.q.05_peak_43525	chr9	27557444	27558463
2_wt.q.05_peak_18501	chr16	41937548	41938572
2_wt.q.05_peak_3648	chr10	9203174	9204611
2_wt.q.05_peak_30439	chr3	155381667	155383225
2_wt.q.05_peak_18649	chr16	51052540	51053098
2_wt.q.05_peak_14927	chr14	93350844	93351604
2_wt.q.05_peak_11992	chr13	54269268	54270324
2_wt.q.05_peak_1470	chr1	84427547	84428272
2_wt.q.05_peak_41927	chr8	64805950	64807528
2_wt.q.05_peak_31672	chr4	83091019	83091621
2_wt.q.05_peak_24962	chr2	45039094	45039761
2_wt.q.05_peak_18153	chr16	30983681	30984265
2_wt.q.05_peak_19297	chr16	95847652	95848250
2_wt.q.05_peak_13196	chr13	109495389	109496081
2_wt.q.05_peak_29655	chr3	115027677	115029379
2_wt.q.05_peak_44974	chr9	92767288	92769065
2_wt.q.05_peak_17422	chr15	100109803	100110561
2_wt.q.05_peak_43281	chr9	14981433	14982215
2_wt.q.05_peak_7290	chr11	67482205	67482950
2_wt.q.05_peak_26175	chr2	104209243	104210078
2_wt.q.05_peak_5012	chr10	83060147	83061179
2_wt.q.05_peak_39102	chr7	49437669	49438291
2_wt.q.05_peak_6292	chr11	17306094	17306542
2_wt.q.05_peak_35859	chr6	4939933	4941301
2_wt.q.05_peak_19469	chr17	8858565	8859927
2_wt.q.05_peak_12396	chr13	76877654	76879136
2_wt.q.05_peak_1791	chr1	106607379	106608431
2_wt.q.05_peak_5131	chr10	90433062	90433333
2_wt.q.05_peak_13365	chr13	117659158	117660365
2_wt.q.05_peak_39265	chr7	63556377	63556838
2_wt.q.05_peak_12957	chr13	99145930	99146978
2_wt.q.05_peak_45342	chr9	108157163	108158158
2_wt.q.05_peak_30209	chr3	142030117	142030536
2_wt.q.05_peak_17243	chr15	94005278	94007189
2_wt.q.05_peak_45210	chr9	105309093	105310036
2_wt.q.05_peak_35896	chr6	8360740	8361476
2_wt.q.05_peak_37460	chr6	101289113	101289395
2_wt.q.05_peak_4148	chr10	34666732	34667763
2_wt.q.05_peak_38276	chr6	140152537	140153218
2_wt.q.05_peak_19213	chr16	92085218	92086339
2_wt.q.05_peak_20756	chr17	81427124	81427767
2_wt.q.05_peak_3652	chr10	9556906	9557755
2_wt.q.05_peak_13053	chr13	102877233	102877709
2_wt.q.05_peak_18688	chr16	55151543	55152335
2_wt.q.05_peak_24316	chr2	17363783	17364295
2_wt.q.05_peak_5570	chr10	108739977	108740346
2_wt.q.05_peak_3920	chr10	21465129	21466015
2_wt.q.05_peak_22184	chr18	62205195	62205554
2_wt.q.05_peak_38388	chr6	146955621	146956132
2_wt.q.05_peak_9528	chr12	43831870	43832786
2_wt.q.05_peak_44474	chr9	64926146	64927066
2_wt.q.05_peak_43872	chr9	42107639	42109948
2_wt.q.05_peak_22609	chr18	80316605	80317520
2_wt.q.05_peak_40067	chr7	100663265	100664663
2_wt.q.05_peak_28507	chr3	55571294	55572695
2_wt.q.05_peak_35864	chr6	5442473	5443606
2_wt.q.05_peak_27271	chr2	151635148	151635895
2_wt.q.05_peak_39819	chr7	91217822	91220138
2_wt.q.05_peak_13187	chr13	109175567	109175969
2_wt.q.05_peak_32499	chr4	128399354	128400480
2_wt.q.05_peak_34193	chr5	66610159	66610840
2_wt.q.05_peak_29555	chr3	107680734	107681442
2_wt.q.05_peak_30846	chr4	25721326	25723872
2_wt.q.05_peak_12489	chr13	82424038	82424543
2_wt.q.05_peak_30357	chr3	152158069	152158732
2_wt.q.05_peak_44725	chr9	75253155	75255397
2_wt.q.05_peak_43652	chr9	32219014	32219937
2_wt.q.05_peak_26453	chr2	117311106	117311550
2_wt.q.05_peak_9595	chr12	47975663	47976500
2_wt.q.05_peak_20976	chr17	90812873	90813265
2_wt.q.05_peak_34628	chr5	97901089	97901660
2_wt.q.05_peak_44770	chr9	77264932	77266332
2_wt.q.05_peak_15944	chr15	36742588	36743274
2_wt.q.05_peak_27068	chr2	142715065	142715446
2_wt.q.05_peak_8717	chr11	117135012	117136769
2_wt.q.05_peak_44847	chr9	83041389	83041775
2_wt.q.05_peak_2506	chr1	154532741	154533612
2_wt.q.05_peak_22695	chr18	86415118	86416649
2_wt.q.05_peak_28827	chr3	79312144	79313086
2_wt.q.05_peak_25419	chr2	68884337	68885401
2_wt.q.05_peak_13014	chr13	101220919	101222267
2_wt.q.05_peak_15796	chr15	28109596	28111277
2_wt.q.05_peak_9470	chr12	38600174	38601087
2_wt.q.05_peak_20269	chr17	55405386	55407650
2_wt.q.05_peak_16051	chr15	39775350	39776466
2_wt.q.05_peak_11354	chr13	20598758	20599263
2_wt.q.05_peak_3171	chr1	177348488	177348979
2_wt.q.05_peak_19061	chr16	81379886	81380667
2_wt.q.05_peak_16633	chr15	69273769	69274623
2_wt.q.05_peak_11004	chr12	118706410	118707200
2_wt.q.05_peak_4580	chr10	63351906	63352284
2_wt.q.05_peak_28325	chr3	45398169	45399563
2_wt.q.05_peak_11985	chr13	54144386	54145123
2_wt.q.05_peak_26984	chr2	138119976	138121159
2_wt.q.05_peak_5638	chr10	109664780	109665041
2_wt.q.05_peak_170	chr1	16257837	16258820
2_wt.q.05_peak_14746	chr14	76540197	76540749
2_wt.q.05_peak_41655	chr8	45699843	45701089
2_wt.q.05_peak_222	chr1	21499827	21500339
2_wt.q.05_peak_15218	chr14	116497663	116498559
2_wt.q.05_peak_31743	chr4	86275651	86276759
2_wt.q.05_peak_16245	chr15	51390650	51391157
2_wt.q.05_peak_5565	chr10	108724455	108725766
2_wt.q.05_peak_40240	chr7	111546613	111547332
2_wt.q.05_peak_4438	chr10	55416387	55417241
2_wt.q.05_peak_32569	chr4	130039623	130039904
2_wt.q.05_peak_2884	chr1	167945608	167946673
2_wt.q.05_peak_39909	chr7	92765844	92766687
2_wt.q.05_peak_15618	chr15	18748669	18748980
2_wt.q.05_peak_28076	chr3	27765723	27766334
2_wt.q.05_peak_19879	chr17	30507437	30508258
2_wt.q.05_peak_32807	chr4	138495099	138496228
2_wt.q.05_peak_30858	chr4	26276123	26276941
2_wt.q.05_peak_2068	chr1	132267976	132269010
2_wt.q.05_peak_10015	chr12	72387867	72388577
2_wt.q.05_peak_3537	chr1	194929680	194931026
2_wt.q.05_peak_41993	chr8	67758585	67759386
2_wt.q.05_peak_9296	chr12	29838166	29838932
2_wt.q.05_peak_12300	chr13	69717999	69718534
2_wt.q.05_peak_44370	chr9	59884222	59884926
2_wt.q.05_peak_18724	chr16	57389281	57390455
2_wt.q.05_peak_60	chr1	9577719	9578450
2_wt.q.05_peak_43439	chr9	25174852	25175797
2_wt.q.05_peak_1383	chr1	80033700	80034534
2_wt.q.05_peak_748	chr1	46963583	46965289
2_wt.q.05_peak_20395	chr17	64503489	64503940
2_wt.q.05_peak_43319	chr9	17395121	17396189
2_wt.q.05_peak_37628	chr6	108334586	108335785
2_wt.q.05_peak_359	chr1	25681763	25682930
2_wt.q.05_peak_29775	chr3	120786658	120787021
2_wt.q.05_peak_5393	chr10	99285280	99285678
2_wt.q.05_peak_20356	chr17	63025071	63026527
2_wt.q.05_peak_28914	chr3	80874222	80874676
2_wt.q.05_peak_13055	chr13	102946454	102946830
2_wt.q.05_peak_41176	chr8	16383825	16384144
2_wt.q.05_peak_16298	chr15	53748845	53749257
2_wt.q.05_peak_9752	chr12	58087075	58088766
2_wt.q.05_peak_9056	chr12	13144539	13145232
2_wt.q.05_peak_32383	chr4	124400803	124401201
2_wt.q.05_peak_45818	chrX	8222312	8223265
2_wt.q.05_peak_27312	chr2	153962706	153963137
2_wt.q.05_peak_44757	chr9	76023860	76024809
2_wt.q.05_peak_33237	chr5	9911641	9912522
2_wt.q.05_peak_36510	chr6	40176768	40177192
2_wt.q.05_peak_43546	chr9	28083555	28084463
2_wt.q.05_peak_39695	chr7	84579182	84579542
2_wt.q.05_peak_25278	chr2	62630111	62630614
2_wt.q.05_peak_36104	chr6	24408202	24409078
2_wt.q.05_peak_36642	chr6	50318436	50319384
2_wt.q.05_peak_9469	chr12	38597921	38598751
2_wt.q.05_peak_29467	chr3	103779329	103780868
2_wt.q.05_peak_41240	chr8	18412259	18412571
2_wt.q.05_peak_28598	chr3	61738788	61739405
2_wt.q.05_peak_35151	chr5	122529586	122530221
2_wt.q.05_peak_2885	chr1	167947154	167947723
2_wt.q.05_peak_41038	chr8	10538105	10538960
2_wt.q.05_peak_23099	chr19	18188053	18188810
2_wt.q.05_peak_25403	chr2	68361196	68362237
2_wt.q.05_peak_41004	chr8	9226733	9227843
2_wt.q.05_peak_11168	chr13	11757374	11758118
2_wt.q.05_peak_33921	chr5	45220348	45220735
2_wt.q.05_peak_23136	chr19	21119037	21119404
2_wt.q.05_peak_26466	chr2	117432117	117432787
2_wt.q.05_peak_35415	chr5	131268987	131269777
2_wt.q.05_peak_17975	chr16	21186813	21187926
2_wt.q.05_peak_23860	chr19	57138892	57139470
2_wt.q.05_peak_12383	chr13	76264581	76264867
2_wt.q.05_peak_14390	chr14	64275944	64276379
2_wt.q.05_peak_1713	chr1	98163463	98164070
2_wt.q.05_peak_21561	chr18	35298364	35299740
2_wt.q.05_peak_19396	chr17	5260771	5262361
2_wt.q.05_peak_26031	chr2	96853075	96854866
2_wt.q.05_peak_19287	chr16	95665748	95666402
2_wt.q.05_peak_33964	chr5	49452077	49453229
2_wt.q.05_peak_10612	chr12	99029673	99030197
2_wt.q.05_peak_2859	chr1	166304340	166305863
2_wt.q.05_peak_41657	chr8	45709109	45709830
2_wt.q.05_peak_40307	chr7	113216719	113217121
2_wt.q.05_peak_28928	chr3	81701461	81702764
2_wt.q.05_peak_17172	chr15	91326751	91327550
2_wt.q.05_peak_21169	chr18	12810652	12811986
2_wt.q.05_peak_30008	chr3	133164184	133165327
2_wt.q.05_peak_27083	chr2	143056116	143057570
2_wt.q.05_peak_43808	chr9	40449920	40450724
2_wt.q.05_peak_27910	chr3	16930597	16931263
2_wt.q.05_peak_24756	chr2	35506747	35507727
2_wt.q.05_peak_34641	chr5	98369351	98370095
2_wt.q.05_peak_26990	chr2	138551374	138552120
2_wt.q.05_peak_25162	chr2	57905186	57906186
2_wt.q.05_peak_17421	chr15	100107893	100108571
2_wt.q.05_peak_13555	chr14	16737591	16739106
2_wt.q.05_peak_10912	chr12	111900916	111901993
2_wt.q.05_peak_32179	chr4	111306463	111308418
2_wt.q.05_peak_10653	chr12	100341722	100342093
2_wt.q.05_peak_26949	chr2	136667065	136667353
2_wt.q.05_peak_30996	chr4	36262170	36263525
2_wt.q.05_peak_12522	chr13	83480052	83482067
2_wt.q.05_peak_27723	chr2	178219795	178220719
2_wt.q.05_peak_28102	chr3	29706748	29707504
2_wt.q.05_peak_15306	chr14	120372761	120373829
2_wt.q.05_peak_5678	chr10	110439392	110441651
2_wt.q.05_peak_30627	chr4	9693799	9694341
2_wt.q.05_peak_45209	chr9	105305989	105306565
2_wt.q.05_peak_18944	chr16	74258400	74259060
2_wt.q.05_peak_28528	chr3	56965888	56966517
2_wt.q.05_peak_16106	chr15	41596497	41598596
2_wt.q.05_peak_9314	chr12	30235601	30236710
2_wt.q.05_peak_6246	chr11	13336828	13338021
2_wt.q.05_peak_41213	chr8	17297213	17297971
2_wt.q.05_peak_10954	chr12	116598845	116600031
2_wt.q.05_peak_21402	chr18	26924821	26926085
2_wt.q.05_peak_18470	chr16	39871417	39871892
2_wt.q.05_peak_13482	chr14	12448902	12449181
2_wt.q.05_peak_9685	chr12	52353781	52354726
2_wt.q.05_peak_20810	chr17	84646882	84647354
2_wt.q.05_peak_11720	chr13	42744122	42745017
2_wt.q.05_peak_22312	chr18	67559928	67560837
2_wt.q.05_peak_41659	chr8	45730239	45731580
2_wt.q.05_peak_15576	chr15	13139405	13140102
2_wt.q.05_peak_23617	chr19	45459640	45461010
2_wt.q.05_peak_24504	chr2	27096529	27097408
2_wt.q.05_peak_28870	chr3	80206834	80208495
2_wt.q.05_peak_6282	chr11	17082785	17084415
2_wt.q.05_peak_19819	chr17	28616300	28616764
2_wt.q.05_peak_14721	chr14	75876268	75877392
2_wt.q.05_peak_29697	chr3	117329230	117329974
2_wt.q.05_peak_26361	chr2	114259432	114260781
2_wt.q.05_peak_43333	chr9	20696176	20696538
2_wt.q.05_peak_19611	chr17	17428716	17429330
2_wt.q.05_peak_37561	chr6	106381255	106382104
2_wt.q.05_peak_23753	chr19	50558550	50559626
2_wt.q.05_peak_46070	chrX	84435251	84435691
2_wt.q.05_peak_41166	chr8	16014192	16015087
2_wt.q.05_peak_13083	chr13	103986425	103987273
2_wt.q.05_peak_24766	chr2	35768007	35769585
2_wt.q.05_peak_35850	chr6	4396649	4398338
2_wt.q.05_peak_40514	chr7	122378634	122379777
2_wt.q.05_peak_37487	chr6	101532117	101532857
2_wt.q.05_peak_28051	chr3	26316945	26318030
2_wt.q.05_peak_3078	chr1	174513001	174514075
2_wt.q.05_peak_13943	chr14	33521127	33521603
2_wt.q.05_peak_46132	chrX	101313854	101314529
2_wt.q.05_peak_41312	chr8	24227971	24228625
2_wt.q.05_peak_1108	chr1	64073721	64074174
2_wt.q.05_peak_336	chr1	25163331	25164139
2_wt.q.05_peak_11970	chr13	52875382	52876082
2_wt.q.05_peak_32688	chr4	134444587	134446267
2_wt.q.05_peak_39594	chr7	80774059	80776581
2_wt.q.05_peak_12138	chr13	59238263	59239385
2_wt.q.05_peak_4216	chr10	40376132	40376867
2_wt.q.05_peak_46028	chrX	72788704	72789227
2_wt.q.05_peak_46056	chrX	77563628	77564194
2_wt.q.05_peak_20354	chr17	63011669	63012211
2_wt.q.05_peak_12334	chr13	73476839	73477652
2_wt.q.05_peak_16184	chr15	44868518	44870181
2_wt.q.05_peak_45575	chr9	113629607	113630074
2_wt.q.05_peak_30325	chr3	146901236	146902380
2_wt.q.05_peak_4050	chr10	28811724	28812420
2_wt.q.05_peak_6359	chr11	22159472	22160196
2_wt.q.05_peak_15943	chr15	36741133	36741941
2_wt.q.05_peak_33447	chr5	21982961	21983599
2_wt.q.05_peak_22941	chr19	8788813	8790055
2_wt.q.05_peak_30700	chr4	14075040	14076537
2_wt.q.05_peak_42487	chr8	90314566	90314998
2_wt.q.05_peak_26803	chr2	131863203	131864927
2_wt.q.05_peak_5853	chr10	119706118	119707403
2_wt.q.05_peak_12163	chr13	60487959	60488792
2_wt.q.05_peak_17093	chr15	86252467	86253802
2_wt.q.05_peak_1593	chr1	91062443	91062886
2_wt.q.05_peak_18316	chr16	34421980	34422449
2_wt.q.05_peak_14678	chr14	74204901	74205663
2_wt.q.05_peak_43568	chr9	28662457	28663817
2_wt.q.05_peak_34355	chr5	74099591	74100840
2_wt.q.05_peak_25192	chr2	59054597	59055010
2_wt.q.05_peak_21397	chr18	26814365	26815098
2_wt.q.05_peak_10127	chr12	76694609	76695557
2_wt.q.05_peak_41370	chr8	26816658	26817594
2_wt.q.05_peak_39960	chr7	97244929	97245977
2_wt.q.05_peak_41921	chr8	64685509	64686931
2_wt.q.05_peak_9175	chr12	24872149	24873295
2_wt.q.05_peak_5792	chr10	116420709	116421405
2_wt.q.05_peak_22628	chr18	82547540	82548189
2_wt.q.05_peak_44049	chr9	48776007	48776545
2_wt.q.05_peak_42859	chr8	111553611	111553914
2_wt.q.05_peak_8794	chr11	119990552	119991730
2_wt.q.05_peak_34222	chr5	67953938	67954604
2_wt.q.05_peak_19506	chr17	11271510	11272457
2_wt.q.05_peak_34041	chr5	53941265	53942885
2_wt.q.05_peak_8418	chr11	105549539	105550313
2_wt.q.05_peak_26878	chr2	134816813	134818626
2_wt.q.05_peak_45068	chr9	97524598	97525535
2_wt.q.05_peak_21102	chr18	9000060	9000781
2_wt.q.05_peak_39364	chr7	66989502	66990223
2_wt.q.05_peak_18404	chr16	37617699	37618537
2_wt.q.05_peak_21562	chr18	35300025	35300336
2_wt.q.05_peak_16325	chr15	54946921	54948040
2_wt.q.05_peak_9794	chr12	59521707	59522711
2_wt.q.05_peak_31549	chr4	76621496	76623350
2_wt.q.05_peak_24413	chr2	21053569	21055165
2_wt.q.05_peak_31530	chr4	75589763	75590388
2_wt.q.05_peak_27085	chr2	143093625	143095600
2_wt.q.05_peak_16673	chr15	72376992	72377832
2_wt.q.05_peak_33873	chr5	43358858	43359919
2_wt.q.05_peak_14542	chr14	67123214	67124024
2_wt.q.05_peak_41615	chr8	41919772	41920235
2_wt.q.05_peak_28851	chr3	79897399	79898094
2_wt.q.05_peak_16441	chr15	62953103	62953914
2_wt.q.05_peak_393	chr1	28806542	28807341
2_wt.q.05_peak_25206	chr2	59828513	59828941
2_wt.q.05_peak_30073	chr3	136691231	136692176
2_wt.q.05_peak_21149	chr18	11904726	11906569
2_wt.q.05_peak_10446	chr12	89375405	89377415
2_wt.q.05_peak_1563	chr1	89049310	89049950
2_wt.q.05_peak_19412	chr17	5506423	5506716
2_wt.q.05_peak_23999	chr2	5411238	5412567
2_wt.q.05_peak_30694	chr4	13873208	13873973
2_wt.q.05_peak_18330	chr16	34524361	34526220
2_wt.q.05_peak_9022	chr12	12064130	12064445
2_wt.q.05_peak_44025	chr9	47786949	47787543
2_wt.q.05_peak_6851	chr11	46298638	46300500
2_wt.q.05_peak_34735	chr5	103103699	103104599
2_wt.q.05_peak_31741	chr4	86234519	86235326
2_wt.q.05_peak_44805	chr9	79526426	79527144
2_wt.q.05_peak_36092	chr6	23739848	23740904
2_wt.q.05_peak_45723	chr9	121599998	121601556
2_wt.q.05_peak_42284	chr8	82967879	82968739
2_wt.q.05_peak_27259	chr2	151536410	151537354
2_wt.q.05_peak_11074	chr13	6191481	6191992
2_wt.q.05_peak_18017	chr16	22408363	22408666
2_wt.q.05_peak_5685	chr10	110563118	110564096
2_wt.q.05_peak_24705	chr2	33439051	33439742
2_wt.q.05_peak_26429	chr2	116922922	116924443
2_wt.q.05_peak_21483	chr18	33036696	33037180
2_wt.q.05_peak_23149	chr19	21513851	21514255
2_wt.q.05_peak_2803	chr1	164704735	164705388
2_wt.q.05_peak_24887	chr2	43690072	43692334
2_wt.q.05_peak_20469	chr17	67011580	67012492
2_wt.q.05_peak_19184	chr16	90997912	90999012
2_wt.q.05_peak_32836	chr4	139033715	139034129
2_wt.q.05_peak_15289	chr14	120136741	120137929
2_wt.q.05_peak_5015	chr10	83101233	83101927
2_wt.q.05_peak_12807	chr13	95034460	95035360
2_wt.q.05_peak_20217	chr17	50599099	50600057
2_wt.q.05_peak_5404	chr10	99450162	99450614
2_wt.q.05_peak_44636	chr9	71016109	71016718
2_wt.q.05_peak_32284	chr4	119880147	119880685
2_wt.q.05_peak_14539	chr14	67096710	67097376
2_wt.q.05_peak_13024	chr13	101490716	101491747
2_wt.q.05_peak_5517	chr10	108074834	108075701
2_wt.q.05_peak_30714	chr4	15111246	15112144
2_wt.q.05_peak_16434	chr15	62112084	62112613
2_wt.q.05_peak_10085	chr12	74825021	74825513
2_wt.q.05_peak_11897	chr13	47225355	47225709
2_wt.q.05_peak_12183	chr13	62940370	62941401
2_wt.q.05_peak_14843	chr14	80025699	80026528
2_wt.q.05_peak_36080	chr6	21591585	21592323
2_wt.q.05_peak_20273	chr17	55477324	55477997
2_wt.q.05_peak_28105	chr3	30736791	30737590
2_wt.q.05_peak_22071	chr18	59260785	59261562
2_wt.q.05_peak_45938	chrX	41564857	41566271
2_wt.q.05_peak_8350	chr11	103661365	103664127
2_wt.q.05_peak_1193	chr1	66649459	66650428
2_wt.q.05_peak_13364	chr13	117657428	117658185
2_wt.q.05_peak_23218	chr19	23806968	23807637
2_wt.q.05_peak_12690	chr13	91954988	91956033
2_wt.q.05_peak_2592	chr1	157178933	157179994
2_wt.q.05_peak_26023	chr2	96585731	96586517
2_wt.q.05_peak_26614	chr2	123072354	123073959
2_wt.q.05_peak_41735	chr8	48488086	48488523
2_wt.q.05_peak_38556	chr7	16155318	16156390
2_wt.q.05_peak_6303	chr11	19944479	19945388
2_wt.q.05_peak_35943	chr6	13597841	13599403
2_wt.q.05_peak_13004	chr13	100953995	100955724
2_wt.q.05_peak_6471	chr11	26599954	26601224
2_wt.q.05_peak_17926	chr16	18451530	18452763
2_wt.q.05_peak_17018	chr15	83434811	83435778
2_wt.q.05_peak_27856	chr3	9726965	9727885
2_wt.q.05_peak_29620	chr3	108781328	108782113
2_wt.q.05_peak_42074	chr8	70104532	70105046
2_wt.q.05_peak_27046	chr2	141230788	141231961
2_wt.q.05_peak_29708	chr3	117601919	117602911
2_wt.q.05_peak_25837	chr2	90488559	90489349
2_wt.q.05_peak_18842	chr16	67001617	67002778
2_wt.q.05_peak_24693	chr2	33094809	33095538
2_wt.q.05_peak_9566	chr12	45053000	45053491
2_wt.q.05_peak_171	chr1	16362446	16362850
2_wt.q.05_peak_5558	chr10	108693591	108695070
2_wt.q.05_peak_36377	chr6	35425900	35426824
2_wt.q.05_peak_19761	chr17	26512539	26513392
2_wt.q.05_peak_14873	chr14	86327493	86328287
2_wt.q.05_peak_25485	chr2	70913859	70914844
2_wt.q.05_peak_42088	chr8	70417829	70418694
2_wt.q.05_peak_23272	chr19	27554587	27555323
2_wt.q.05_peak_20996	chr17	93104026	93105098
2_wt.q.05_peak_14452	chr14	65089202	65089735
2_wt.q.05_peak_37559	chr6	106335019	106335617
2_wt.q.05_peak_106	chr1	11577722	11578891
2_wt.q.05_peak_2523	chr1	154788315	154789200
2_wt.q.05_peak_44207	chr9	54667961	54668459
2_wt.q.05_peak_33282	chr5	15831976	15833204
2_wt.q.05_peak_24990	chr2	45246225	45247114
2_wt.q.05_peak_16733	chr15	74597445	74598331
2_wt.q.05_peak_17174	chr15	91369986	91370778
2_wt.q.05_peak_37863	chr6	116901540	116902394
2_wt.q.05_peak_8609	chr11	112298662	112299325
2_wt.q.05_peak_28585	chr3	60615994	60616278
2_wt.q.05_peak_25390	chr2	67971001	67972221
2_wt.q.05_peak_10792	chr12	106302541	106303095
2_wt.q.05_peak_7664	chr11	79030454	79031102
2_wt.q.05_peak_36195	chr6	29099366	29102296
2_wt.q.05_peak_10697	chr12	100710220	100711702
2_wt.q.05_peak_22547	chr18	77219407	77220383
2_wt.q.05_peak_11299	chr13	18337914	18339104
2_wt.q.05_peak_12638	chr13	89286659	89287314
2_wt.q.05_peak_8970	chr12	8452919	8453817
2_wt.q.05_peak_14531	chr14	66931803	66932063
2_wt.q.05_peak_9441	chr12	36092100	36093584
2_wt.q.05_peak_21662	chr18	38096207	38097122
2_wt.q.05_peak_3948	chr10	22631380	22632137
2_wt.q.05_peak_26440	chr2	117139442	117140194
2_wt.q.05_peak_20618	chr17	73518029	73518598
2_wt.q.05_peak_31763	chr4	87151375	87152730
2_wt.q.05_peak_31622	chr4	82028568	82029138
2_wt.q.05_peak_5677	chr10	110430930	110431640
2_wt.q.05_peak_8948	chr12	6815001	6816725
2_wt.q.05_peak_24257	chr2	12798855	12800207
2_wt.q.05_peak_39479	chr7	75222977	75223524
2_wt.q.05_peak_39868	chr7	91784865	91786054
2_wt.q.05_peak_30419	chr3	154651166	154651875
2_wt.q.05_peak_4218	chr10	40449564	40450007
2_wt.q.05_peak_37344	chr6	94080814	94081178
2_wt.q.05_peak_7733	chr11	80886126	80887319
2_wt.q.05_peak_38139	chr6	135087710	135088181
2_wt.q.05_peak_1377	chr1	79710272	79711595
2_wt.q.05_peak_33218	chr5	9494200	9496054
2_wt.q.05_peak_24309	chr2	16544843	16545365
2_wt.q.05_peak_39312	chr7	64776611	64777283
2_wt.q.05_peak_13804	chr14	27713320	27713695
2_wt.q.05_peak_12825	chr13	95822836	95823822
2_wt.q.05_peak_11322	chr13	19106133	19106789
2_wt.q.05_peak_41813	chr8	55016890	55017279
2_wt.q.05_peak_30722	chr4	15434832	15435539
2_wt.q.05_peak_23135	chr19	20793009	20793291
2_wt.q.05_peak_31757	chr4	87055507	87056569
2_wt.q.05_peak_14932	chr14	93539890	93540195
2_wt.q.05_peak_30449	chr3	156690389	156690655
2_wt.q.05_peak_29692	chr3	117217840	117218515
2_wt.q.05_peak_4235	chr10	40762151	40763951
2_wt.q.05_peak_9949	chr12	70334648	70336229
2_wt.q.05_peak_31596	chr4	80517590	80517880
2_wt.q.05_peak_18323	chr16	34489567	34491710
2_wt.q.05_peak_39658	chr7	83089895	83090247
2_wt.q.05_peak_26024	chr2	96591530	96592981
2_wt.q.05_peak_27045	chr2	141228264	141229345
2_wt.q.05_peak_25137	chr2	55450330	55451609
2_wt.q.05_peak_44002	chr9	46703499	46704564
2_wt.q.05_peak_4432	chr10	54447940	54449225
2_wt.q.05_peak_23155	chr19	21764603	21765289
2_wt.q.05_peak_34626	chr5	97851758	97852437
2_wt.q.05_peak_6525	chr11	29765854	29767294
2_wt.q.05_peak_7688	chr11	79673131	79673425
2_wt.q.05_peak_37645	chr6	108592034	108593100
2_wt.q.05_peak_12869	chr13	97388945	97391214
2_wt.q.05_peak_554	chr1	37744658	37745337
2_wt.q.05_peak_27208	chr2	148325648	148325949
2_wt.q.05_peak_41465	chr8	34372108	34372930
2_wt.q.05_peak_9802	chr12	59822697	59823840
2_wt.q.05_peak_15094	chr14	105194263	105195471
2_wt.q.05_peak_36834	chr6	62198513	62199666
2_wt.q.05_peak_19614	chr17	17592482	17593693
2_wt.q.05_peak_40232	chr7	111301586	111302260
2_wt.q.05_peak_3556	chr10	3514301	3514822
2_wt.q.05_peak_9896	chr12	69812296	69813089
2_wt.q.05_peak_10469	chr12	89977365	89978036
2_wt.q.05_peak_37328	chr6	93661551	93661814
2_wt.q.05_peak_26067	chr2	98901782	98902105
2_wt.q.05_peak_9253	chr12	29082586	29084197
2_wt.q.05_peak_36320	chr6	32637683	32639199
2_wt.q.05_peak_20843	chr17	86344822	86346213
2_wt.q.05_peak_20166	chr17	47198970	47199537
2_wt.q.05_peak_35996	chr6	17418185	17419634
2_wt.q.05_peak_39788	chr7	90539221	90539484
2_wt.q.05_peak_31585	chr4	79051823	79053783
2_wt.q.05_peak_22244	chr18	65092543	65093024
2_wt.q.05_peak_28852	chr3	79929649	79930548
2_wt.q.05_peak_34947	chr5	113513805	113514256
2_wt.q.05_peak_12512	chr13	83110779	83112442
2_wt.q.05_peak_40981	chr8	7732323	7732924
2_wt.q.05_peak_28018	chr3	23592442	23592961
2_wt.q.05_peak_5921	chr10	123182642	123183190
2_wt.q.05_peak_45874	chrX	18873566	18874147
2_wt.q.05_peak_37021	chr6	81413515	81414331
2_wt.q.05_peak_16826	chr15	77363772	77364567
2_wt.q.05_peak_15146	chr14	108791123	108792036
2_wt.q.05_peak_27393	chr2	156581058	156581708
2_wt.q.05_peak_12810	chr13	95095604	95096142
2_wt.q.05_peak_41452	chr8	34054104	34054548
2_wt.q.05_peak_32909	chr4	145052672	145053226
2_wt.q.05_peak_33767	chr5	36573410	36574725
2_wt.q.05_peak_9543	chr12	44371273	44371797
2_wt.q.05_peak_16732	chr15	74596219	74596695
2_wt.q.05_peak_45722	chr9	121556820	121558108
2_wt.q.05_peak_21203	chr18	15023549	15024460
2_wt.q.05_peak_20797	chr17	84263351	84263794
2_wt.q.05_peak_16478	chr15	64435756	64436660
2_wt.q.05_peak_40526	chr7	122571972	122573640
2_wt.q.05_peak_45230	chr9	105720166	105721072
2_wt.q.05_peak_18309	chr16	34388973	34389811
2_wt.q.05_peak_15201	chr14	114547911	114548680
2_wt.q.05_peak_11064	chr13	5728095	5728783
2_wt.q.05_peak_15126	chr14	105779371	105780181
2_wt.q.05_peak_18994	chr16	77094973	77095932
2_wt.q.05_peak_4484	chr10	58797361	58798278
2_wt.q.05_peak_12395	chr13	76868446	76869330
2_wt.q.05_peak_23111	chr19	18969211	18969544
2_wt.q.05_peak_25960	chr2	92492121	92492750
2_wt.q.05_peak_5943	chr10	125108580	125109535
2_wt.q.05_peak_14607	chr14	70723773	70725117
2_wt.q.05_peak_23967	chr2	4226910	4227649
2_wt.q.05_peak_2857	chr1	166296830	166300438
2_wt.q.05_peak_19413	chr17	5507053	5507411
2_wt.q.05_peak_30249	chr3	143729570	143730271
2_wt.q.05_peak_20397	chr17	64578674	64579844
2_wt.q.05_peak_13261	chr13	110967835	110968703
2_wt.q.05_peak_18784	chr16	63104076	63105113
2_wt.q.05_peak_43318	chr9	17392354	17393780
2_wt.q.05_peak_19296	chr16	95823995	95824674
2_wt.q.05_peak_3249	chr1	180507280	180507971
2_wt.q.05_peak_43665	chr9	34411679	34412906
2_wt.q.05_peak_39264	chr7	63554240	63555008
2_wt.q.05_peak_20911	chr17	89277313	89277929
2_wt.q.05_peak_34609	chr5	96675284	96676485
2_wt.q.05_peak_43069	chr8	124391546	124392352
2_wt.q.05_peak_5150	chr10	90674098	90674813
2_wt.q.05_peak_21741	chr18	40032305	40032753
2_wt.q.05_peak_9557	chr12	44554639	44555101
2_wt.q.05_peak_25668	chr2	78387736	78388233
2_wt.q.05_peak_25106	chr2	52959843	52960534
2_wt.q.05_peak_38213	chr6	136363114	136364868
2_wt.q.05_peak_39494	chr7	75295778	75296263
2_wt.q.05_peak_16295	chr15	53688900	53689424
2_wt.q.05_peak_27082	chr2	143034560	143035795
2_wt.q.05_peak_12433	chr13	78587478	78587896
2_wt.q.05_peak_24836	chr2	39157577	39158369
2_wt.q.05_peak_26926	chr2	136113117	136113898
2_wt.q.05_peak_20557	chr17	70588643	70589804
2_wt.q.05_peak_37484	chr6	101501951	101502574
2_wt.q.05_peak_30425	chr3	154707803	154708847
2_wt.q.05_peak_12265	chr13	68815310	68817317
2_wt.q.05_peak_28549	chr3	57997997	57999646
2_wt.q.05_peak_814	chr1	51822110	51822611
2_wt.q.05_peak_13248	chr13	110643265	110643917
2_wt.q.05_peak_7966	chr11	91431887	91432636
2_wt.q.05_peak_8945	chr12	6579820	6580657
2_wt.q.05_peak_19078	chr16	83420630	83421497
2_wt.q.05_peak_35701	chr5	144913395	144915605
2_wt.q.05_peak_16061	chr15	39849105	39849779
2_wt.q.05_peak_22635	chr18	82717000	82717759
2_wt.q.05_peak_14872	chr14	86170816	86171644
2_wt.q.05_peak_26129	chr2	102632097	102633018
2_wt.q.05_peak_41616	chr8	41920737	41921704
2_wt.q.05_peak_5632	chr10	109598476	109599174
2_wt.q.05_peak_28504	chr3	55531240	55533075
2_wt.q.05_peak_10815	chr12	108007845	108009516
2_wt.q.05_peak_16550	chr15	67926959	67928115
2_wt.q.05_peak_36833	chr6	62196382	62197376
2_wt.q.05_peak_32748	chr4	136373700	136374093
2_wt.q.05_peak_2304	chr1	141966639	141967413
2_wt.q.05_peak_40751	chr7	132209139	132209716
2_wt.q.05_peak_20089	chr17	44637142	44638190
2_wt.q.05_peak_19903	chr17	31660840	31661274
2_wt.q.05_peak_34263	chr5	71606675	71609685
2_wt.q.05_peak_21435	chr18	30643512	30644472
2_wt.q.05_peak_20898	chr17	88262243	88263191
2_wt.q.05_peak_1396	chr1	80602793	80603560
2_wt.q.05_peak_6920	chr11	49942326	49943109
2_wt.q.05_peak_20394	chr17	64406831	64407669
2_wt.q.05_peak_14305	chr14	61091063	61092376
2_wt.q.05_peak_13944	chr14	33531153	33531750
2_wt.q.05_peak_37671	chr6	110136979	110137777
2_wt.q.05_peak_4408	chr10	53342606	53343164
2_wt.q.05_peak_4150	chr10	34911799	34912182
2_wt.q.05_peak_11647	chr13	37360057	37360540
2_wt.q.05_peak_14906	chr14	89065198	89065831
2_wt.q.05_peak_45257	chr9	106402866	106403148
2_wt.q.05_peak_22297	chr18	67164205	67165202
2_wt.q.05_peak_19023	chr16	77820615	77821694
2_wt.q.05_peak_18505	chr16	42079290	42080239
2_wt.q.05_peak_19501	chr17	11159248	11159783
2_wt.q.05_peak_4231	chr10	40732961	40734203
2_wt.q.05_peak_46374	chrX	166338568	166339930
2_wt.q.05_peak_19779	chr17	26893105	26893636
2_wt.q.05_peak_8024	chr11	94425364	94426186
2_wt.q.05_peak_27414	chr2	156740478	156742012
2_wt.q.05_peak_25146	chr2	55580081	55580738
2_wt.q.05_peak_25477	chr2	70815729	70816969
2_wt.q.05_peak_26462	chr2	117385569	117387821
2_wt.q.05_peak_41393	chr8	28698826	28699447
2_wt.q.05_peak_28075	chr3	27764785	27765255
2_wt.q.05_peak_31871	chr4	95648332	95649628
2_wt.q.05_peak_41920	chr8	64671534	64672563
2_wt.q.05_peak_24757	chr2	35508837	35509243
2_wt.q.05_peak_21319	chr18	23654018	23654921
2_wt.q.05_peak_20508	chr17	70072119	70072744
2_wt.q.05_peak_35834	chr5	151059767	151060465
2_wt.q.05_peak_17095	chr15	86279005	86279909
2_wt.q.05_peak_20215	chr17	50524470	50525310
2_wt.q.05_peak_15440	chr15	5002950	5004097
2_wt.q.05_peak_10546	chr12	95776275	95777400
2_wt.q.05_peak_6782	chr11	42579637	42581300
2_wt.q.05_peak_33988	chr5	52023368	52023830
2_wt.q.05_peak_10487	chr12	92072944	92074425
2_wt.q.05_peak_29398	chr3	98418907	98420311
2_wt.q.05_peak_21968	chr18	52402928	52403785
2_wt.q.05_peak_16699	chr15	73430411	73430748
2_wt.q.05_peak_27839	chr3	8851805	8852432
2_wt.q.05_peak_19861	chr17	30130652	30130949
2_wt.q.05_peak_23346	chr19	31114824	31115134
2_wt.q.05_peak_3669	chr10	9892825	9893386
2_wt.q.05_peak_16059	chr15	39829707	39831090
2_wt.q.05_peak_29088	chr3	87246939	87247405
2_wt.q.05_peak_41565	chr8	39315451	39316376
2_wt.q.05_peak_39154	chr7	55146016	55146685
2_wt.q.05_peak_11071	chr13	6166927	6167662
2_wt.q.05_peak_20505	chr17	70034506	70034995
2_wt.q.05_peak_6238	chr11	12532650	12533084
2_wt.q.05_peak_36256	chr6	31114006	31117740
2_wt.q.05_peak_23972	chr2	4499456	4500694
2_wt.q.05_peak_14626	chr14	72004038	72004619
2_wt.q.05_peak_30098	chr3	136967151	136967840
2_wt.q.05_peak_2087	chr1	132817047	132818136
2_wt.q.05_peak_28508	chr3	55664452	55665214
2_wt.q.05_peak_11773	chr13	43495195	43496320
2_wt.q.05_peak_39634	chr7	81875548	81875823
2_wt.q.05_peak_35737	chr5	147043050	147044971
2_wt.q.05_peak_10427	chr12	88924855	88925736
2_wt.q.05_peak_36594	chr6	46704816	46706558
2_wt.q.05_peak_18586	chr16	45690025	45690813
2_wt.q.05_peak_30720	chr4	15301666	15302310
2_wt.q.05_peak_35312	chr5	126068436	126068984
2_wt.q.05_peak_4233	chr10	40749669	40751683
2_wt.q.05_peak_4713	chr10	69792172	69793289
2_wt.q.05_peak_35347	chr5	128809622	128810123
2_wt.q.05_peak_3399	chr1	190971820	190972805
2_wt.q.05_peak_17471	chr15	100950944	100952381
2_wt.q.05_peak_11073	chr13	6188442	6189596
2_wt.q.05_peak_20811	chr17	84713095	84714517
2_wt.q.05_peak_41848	chr8	57892011	57893425
2_wt.q.05_peak_32195	chr4	114515564	114516304
2_wt.q.05_peak_28583	chr3	60572615	60573195
2_wt.q.05_peak_25163	chr2	57906454	57907286
2_wt.q.05_peak_9034	chr12	12225071	12226331
2_wt.q.05_peak_27629	chr2	167137182	167137506
2_wt.q.05_peak_13241	chr13	110540425	110541981
2_wt.q.05_peak_13538	chr14	15410858	15411245
2_wt.q.05_peak_16104	chr15	41518370	41518822
2_wt.q.05_peak_18923	chr16	72544677	72546038
2_wt.q.05_peak_790	chr1	51008156	51008701
2_wt.q.05_peak_6362	chr11	22353866	22355253
2_wt.q.05_peak_44907	chr9	86626649	86628414
2_wt.q.05_peak_9316	chr12	30246399	30247139
2_wt.q.05_peak_13150	chr13	106817184	106817915
2_wt.q.05_peak_948	chr1	56130855	56131539
2_wt.q.05_peak_5650	chr10	109798999	109799874
2_wt.q.05_peak_34094	chr5	58118085	58118575
2_wt.q.05_peak_27467	chr2	158687963	158688524
2_wt.q.05_peak_37213	chr6	89552521	89553304
2_wt.q.05_peak_31249	chr4	52264740	52265174
2_wt.q.05_peak_21706	chr18	39294714	39295331
2_wt.q.05_peak_29507	chr3	105695813	105696542
2_wt.q.05_peak_3388	chr1	189631701	189632948
2_wt.q.05_peak_35570	chr5	139136315	139136885
2_wt.q.05_peak_34275	chr5	71828122	71829821
2_wt.q.05_peak_1904	chr1	123901138	123901684
2_wt.q.05_peak_30692	chr4	13832669	13833944
2_wt.q.05_peak_30424	chr3	154700544	154701075
2_wt.q.05_peak_27732	chr2	178565287	178566115
2_wt.q.05_peak_28085	chr3	28526308	28527667
2_wt.q.05_peak_17321	chr15	97314895	97315457
2_wt.q.05_peak_38164	chr6	135799773	135800420
2_wt.q.05_peak_41992	chr8	67750691	67753373
2_wt.q.05_peak_29709	chr3	117606223	117607109
2_wt.q.05_peak_4341	chr10	45092596	45093072
2_wt.q.05_peak_10539	chr12	95735165	95735896
2_wt.q.05_peak_26073	chr2	101019694	101020232
2_wt.q.05_peak_36536	chr6	41553349	41554093
2_wt.q.05_peak_33145	chr5	4220962	4222718
2_wt.q.05_peak_9587	chr12	46416655	46417112
2_wt.q.05_peak_34480	chr5	84317326	84318396
2_wt.q.05_peak_13140	chr13	106406327	106407341
2_wt.q.05_peak_39087	chr7	49258266	49259571
2_wt.q.05_peak_24146	chr2	7335259	7335575
2_wt.q.05_peak_37523	chr6	103612895	103614183
2_wt.q.05_peak_2234	chr1	137788733	137789249
2_wt.q.05_peak_19327	chr16	97072890	97073160
2_wt.q.05_peak_29998	chr3	132102926	132103772
2_wt.q.05_peak_3555	chr10	3398305	3398691
2_wt.q.05_peak_18928	chr16	72717100	72717745
2_wt.q.05_peak_26460	chr2	117381051	117382588
2_wt.q.05_peak_24889	chr2	43763771	43765146
2_wt.q.05_peak_6574	chr11	31753765	31754762
2_wt.q.05_peak_21354	chr18	24959073	24959521
2_wt.q.05_peak_21381	chr18	25734844	25735691
2_wt.q.05_peak_14184	chr14	54733956	54734595
2_wt.q.05_peak_31184	chr4	46883643	46884294
2_wt.q.05_peak_18524	chr16	42745775	42746725
2_wt.q.05_peak_25294	chr2	62923495	62924261
2_wt.q.05_peak_24424	chr2	21727846	21728860
2_wt.q.05_peak_27279	chr2	152111545	152112550
2_wt.q.05_peak_9304	chr12	29933822	29934709
2_wt.q.05_peak_35294	chr5	125578030	125579323
2_wt.q.05_peak_24961	chr2	45035941	45038061
2_wt.q.05_peak_26173	chr2	104205965	104206381
2_wt.q.05_peak_15236	chr14	117813352	117813883
2_wt.q.05_peak_44573	chr9	67717253	67717769
2_wt.q.05_peak_29821	chr3	122573273	122575261
2_wt.q.05_peak_14398	chr14	64357814	64358911
2_wt.q.05_peak_26220	chr2	106517118	106517827
2_wt.q.05_peak_37302	chr6	92521468	92522185
2_wt.q.05_peak_21328	chr18	23862013	23863537
2_wt.q.05_peak_43557	chr9	28386987	28387441
2_wt.q.05_peak_15231	chr14	117409687	117410208
2_wt.q.05_peak_19874	chr17	30458403	30459407
2_wt.q.05_peak_37991	chr6	122768968	122770251
2_wt.q.05_peak_13902	chr14	31197793	31200081
2_wt.q.05_peak_7744	chr11	81492062	81493022
2_wt.q.05_peak_28702	chr3	68692801	68694552
2_wt.q.05_peak_37562	chr6	106408284	106409296
2_wt.q.05_peak_356	chr1	25623188	25623708
2_wt.q.05_peak_44883	chr9	85674200	85674765
2_wt.q.05_peak_11262	chr13	16349822	16350121
2_wt.q.05_peak_38048	chr6	126581846	126582225
2_wt.q.05_peak_28746	chr3	70457575	70458207
2_wt.q.05_peak_25401	chr2	68336312	68337454
2_wt.q.05_peak_17699	chr16	9689846	9690921
2_wt.q.05_peak_26439	chr2	117136487	117137172
2_wt.q.05_peak_9070	chr12	13809366	13809866
2_wt.q.05_peak_1906	chr1	123927883	123928146
2_wt.q.05_peak_31482	chr4	70463431	70463852
2_wt.q.05_peak_11146	chr13	10235021	10236779
2_wt.q.05_peak_21308	chr18	23426745	23427534
2_wt.q.05_peak_893	chr1	54117732	54119788
2_wt.q.05_peak_24759	chr2	35610355	35610768
2_wt.q.05_peak_41165	chr8	15994143	15995634
2_wt.q.05_peak_7663	chr11	78831199	78832939
2_wt.q.05_peak_18576	chr16	45104875	45105686
2_wt.q.05_peak_18901	chr16	70586190	70586706
2_wt.q.05_peak_12542	chr13	83585589	83589671
2_wt.q.05_peak_20833	chr17	86225476	86226312
2_wt.q.05_peak_10566	chr12	97750431	97750704
2_wt.q.05_peak_34054	chr5	54236865	54238332
2_wt.q.05_peak_30135	chr3	137952399	137952957
2_wt.q.05_peak_9076	chr12	14088950	14089527
2_wt.q.05_peak_33259	chr5	13667098	13668913
2_wt.q.05_peak_5257	chr10	94134383	94135498
2_wt.q.05_peak_30164	chr3	138888881	138889604
2_wt.q.05_peak_34364	chr5	74277360	74277883
2_wt.q.05_peak_42687	chr8	104028470	104028758
2_wt.q.05_peak_43713	chr9	36989597	36990484
2_wt.q.05_peak_35522	chr5	136487273	136488719
2_wt.q.05_peak_32849	chr4	140037861	140038236
2_wt.q.05_peak_42740	chr8	105924770	105925803
2_wt.q.05_peak_5479	chr10	106737827	106738149
2_wt.q.05_peak_23565	chr19	43926544	43928050
2_wt.q.05_peak_9707	chr12	53028767	53029420
2_wt.q.05_peak_32412	chr4	125814411	125814903
2_wt.q.05_peak_25265	chr2	62489131	62490023
2_wt.q.05_peak_10701	chr12	100771061	100771678
2_wt.q.05_peak_45647	chr9	119005611	119006457
2_wt.q.05_peak_18312	chr16	34402207	34402584
2_wt.q.05_peak_2992	chr1	170770185	170770908
2_wt.q.05_peak_15280	chr14	119798445	119798909
2_wt.q.05_peak_39715	chr7	87787549	87788351
2_wt.q.05_peak_26463	chr2	117388273	117388656
2_wt.q.05_peak_15983	chr15	37616895	37617427
2_wt.q.05_peak_41548	chr8	38926972	38928326
2_wt.q.05_peak_36606	chr6	47458319	47458722
2_wt.q.05_peak_36538	chr6	41560603	41561036
2_wt.q.05_peak_39896	chr7	92383758	92384475
2_wt.q.05_peak_11082	chr13	6471121	6472376
2_wt.q.05_peak_13470	chr14	12171724	12172718
2_wt.q.05_peak_18894	chr16	70091633	70093616
2_wt.q.05_peak_21659	chr18	38082892	38083179
2_wt.q.05_peak_22099	chr18	60576707	60578221
2_wt.q.05_peak_11161	chr13	11294388	11295200
2_wt.q.05_peak_41784	chr8	54736070	54736991
2_wt.q.05_peak_39303	chr7	64644451	64645612
2_wt.q.05_peak_13945	chr14	33532784	33533282
2_wt.q.05_peak_46105	chrX	95156753	95157420
2_wt.q.05_peak_11309	chr13	18857724	18859164
2_wt.q.05_peak_26645	chr2	125809378	125810270
2_wt.q.05_peak_33732	chr5	34582208	34582909
2_wt.q.05_peak_9346	chr12	31754181	31757030
2_wt.q.05_peak_33119	chr4	155708915	155709604
2_wt.q.05_peak_43767	chr9	37813872	37815549
2_wt.q.05_peak_30392	chr3	152906528	152907292
2_wt.q.05_peak_10059	chr12	74232639	74233049
2_wt.q.05_peak_42003	chr8	67853493	67853903
2_wt.q.05_peak_31143	chr4	45832138	45832540
2_wt.q.05_peak_7767	chr11	83354662	83356601
2_wt.q.05_peak_41260	chr8	22485838	22486254
2_wt.q.05_peak_1522	chr1	86834860	86835801
2_wt.q.05_peak_34212	chr5	67793852	67794754
2_wt.q.05_peak_37070	chr6	84444966	84445850
2_wt.q.05_peak_13663	chr14	21519291	21521082
2_wt.q.05_peak_33395	chr5	20614312	20615632
2_wt.q.05_peak_41574	chr8	39779832	39782600
2_wt.q.05_peak_14914	chr14	91889050	91890120
2_wt.q.05_peak_17805	chr16	13371705	13372553
2_wt.q.05_peak_4676	chr10	68558237	68558993
2_wt.q.05_peak_23632	chr19	45917450	45918488
2_wt.q.05_peak_15434	chr15	4315746	4316628
2_wt.q.05_peak_43402	chr9	23565685	23566413
2_wt.q.05_peak_15290	chr14	120140942	120141480
2_wt.q.05_peak_35423	chr5	131965349	131965989
2_wt.q.05_peak_30082	chr3	136769596	136770775
2_wt.q.05_peak_20551	chr17	70570650	70571808
2_wt.q.05_peak_14592	chr14	70473724	70474610
2_wt.q.05_peak_12822	chr13	95424839	95425338
2_wt.q.05_peak_18992	chr16	77034315	77034907
2_wt.q.05_peak_34240	chr5	70252098	70252839
2_wt.q.05_peak_28372	chr3	51195193	51196040
2_wt.q.05_peak_8104	chr11	97609975	97611573
2_wt.q.05_peak_39655	chr7	83015003	83015610
2_wt.q.05_peak_43486	chr9	26728854	26729117
2_wt.q.05_peak_15120	chr14	105667434	105667864
2_wt.q.05_peak_5905	chr10	122917628	122918718
2_wt.q.05_peak_27343	chr2	154972528	154973053
2_wt.q.05_peak_4359	chr10	47028716	47029409
2_wt.q.05_peak_15918	chr15	35724527	35724960
2_wt.q.05_peak_30087	chr3	136840623	136843159
2_wt.q.05_peak_13557	chr14	16846687	16847582
2_wt.q.05_peak_41520	chr8	36361456	36362294
2_wt.q.05_peak_20906	chr17	88769820	88770581
2_wt.q.05_peak_36102	chr6	24324596	24325438
2_wt.q.05_peak_29840	chr3	123425408	123426179
2_wt.q.05_peak_24112	chr2	7072064	7073114
2_wt.q.05_peak_38320	chr6	143664976	143665521
2_wt.q.05_peak_23531	chr19	42017254	42017975
2_wt.q.05_peak_4730	chr10	70373029	70373581
2_wt.q.05_peak_31391	chr4	64282289	64282952
2_wt.q.05_peak_30584	chr4	6839388	6840535
2_wt.q.05_peak_31445	chr4	68927351	68927736
2_wt.q.05_peak_6403	chr11	24005241	24006182
2_wt.q.05_peak_40466	chr7	121213522	121214193
2_wt.q.05_peak_30562	chr4	5941396	5942526
2_wt.q.05_peak_6678	chr11	36652846	36654064
2_wt.q.05_peak_13444	chr14	10046928	10048023
2_wt.q.05_peak_11268	chr13	16655573	16656795
2_wt.q.05_peak_30834	chr4	25015025	25015886
2_wt.q.05_peak_24813	chr2	38402731	38403339
2_wt.q.05_peak_7959	chr11	90807641	90808839
2_wt.q.05_peak_42614	chr8	97733284	97734045
2_wt.q.05_peak_45768	chr9	122628981	122629719
2_wt.q.05_peak_5138	chr10	90595055	90598479
2_wt.q.05_peak_36641	chr6	50314304	50315591
2_wt.q.05_peak_30284	chr3	144820493	144820837
2_wt.q.05_peak_43576	chr9	28855532	28856324
2_wt.q.05_peak_26013	chr2	95890755	95892777
2_wt.q.05_peak_22169	chr18	61676253	61676896
2_wt.q.05_peak_26170	chr2	104172654	104173934
2_wt.q.05_peak_10657	chr12	100361148	100362231
2_wt.q.05_peak_34734	chr5	103100862	103102451
2_wt.q.05_peak_15121	chr14	105668358	105669702
2_wt.q.05_peak_20272	chr17	55475753	55476441
2_wt.q.05_peak_20831	chr17	86184893	86185991
2_wt.q.05_peak_27059	chr2	142264291	142264904
2_wt.q.05_peak_46015	chrX	70899987	70900410
2_wt.q.05_peak_4749	chr10	70799109	70800542
2_wt.q.05_peak_14899	chr14	88346714	88348289
2_wt.q.05_peak_4433	chr10	54551719	54552450
2_wt.q.05_peak_3886	chr10	20181565	20182233
2_wt.q.05_peak_43611	chr9	30076317	30076665
2_wt.q.05_peak_16730	chr15	74577864	74578295
2_wt.q.05_peak_11966	chr13	52569520	52570838
2_wt.q.05_peak_39533	chr7	78731177	78731879
2_wt.q.05_peak_33156	chr5	5012625	5013259
2_wt.q.05_peak_20832	chr17	86214545	86215005
2_wt.q.05_peak_4876	chr10	78143995	78144300
2_wt.q.05_peak_29446	chr3	101793783	101794495
2_wt.q.05_peak_4743	chr10	70533559	70533939
2_wt.q.05_peak_2628	chr1	157654743	157655639
2_wt.q.05_peak_43042	chr8	123724630	123726034
2_wt.q.05_peak_30099	chr3	136981098	136981847
2_wt.q.05_peak_223	chr1	21500675	21501277
2_wt.q.05_peak_30456	chr3	156793153	156793429
2_wt.q.05_peak_26146	chr2	102942621	102943586
2_wt.q.05_peak_27816	chr3	7424376	7425187
2_wt.q.05_peak_4051	chr10	28843308	28844279
2_wt.q.05_peak_17187	chr15	91613597	91614413
2_wt.q.05_peak_10687	chr12	100527676	100528222
2_wt.q.05_peak_26174	chr2	104207828	104208546
2_wt.q.05_peak_394	chr1	28808126	28808593
2_wt.q.05_peak_31164	chr4	46711400	46711828
2_wt.q.05_peak_46328	chrX	160604104	160604780
2_wt.q.05_peak_45214	chr9	105388935	105389455
2_wt.q.05_peak_9029	chr12	12196578	12197826
2_wt.q.05_peak_40397	chr7	117709576	117710008
2_wt.q.05_peak_35407	chr5	130792708	130793267
2_wt.q.05_peak_10957	chr12	116622364	116623163
2_wt.q.05_peak_9748	chr12	57826020	57826521
2_wt.q.05_peak_15113	chr14	105599556	105600325
2_wt.q.05_peak_43711	chr9	36973017	36974256
2_wt.q.05_peak_30849	chr4	25741291	25742012
2_wt.q.05_peak_44040	chr9	48723318	48724184
2_wt.q.05_peak_12510	chr13	83064776	83065810
2_wt.q.05_peak_22621	chr18	82471929	82472794
2_wt.q.05_peak_24895	chr2	43903920	43904797
2_wt.q.05_peak_23124	chr19	20232977	20234133
2_wt.q.05_peak_19906	chr17	32022658	32023567
2_wt.q.05_peak_6785	chr11	42605940	42606657
2_wt.q.05_peak_26847	chr2	132741890	132742954
2_wt.q.05_peak_20083	chr17	44520966	44521234
2_wt.q.05_peak_7661	chr11	78804785	78806380
2_wt.q.05_peak_1892	chr1	122393894	122394268
2_wt.q.05_peak_46399	chrX	167812160	167812619
2_wt.q.05_peak_30788	chr4	21299670	21300631
2_wt.q.05_peak_30204	chr3	141818589	141820204
2_wt.q.05_peak_33875	chr5	43379550	43380159
2_wt.q.05_peak_43141	chr8	126839744	126840306
2_wt.q.05_peak_1032	chr1	59943914	59944664
2_wt.q.05_peak_40585	chr7	124788380	124788885
2_wt.q.05_peak_26903	chr2	135439710	135440007
2_wt.q.05_peak_7987	chr11	93565429	93566267
2_wt.q.05_peak_18080	chr16	26549509	26550035
2_wt.q.05_peak_14949	chr14	93871325	93871851
2_wt.q.05_peak_119	chr1	12367110	12368519
2_wt.q.05_peak_31292	chr4	55189681	55191020
2_wt.q.05_peak_27599	chr2	166107949	166108759
2_wt.q.05_peak_7795	chr11	84096641	84098099
2_wt.q.05_peak_13416	chr14	8134683	8135803
2_wt.q.05_peak_13567	chr14	17735034	17735299
2_wt.q.05_peak_22262	chr18	65245173	65245489
2_wt.q.05_peak_11079	chr13	6365239	6365860
2_wt.q.05_peak_36079	chr6	21590405	21591007
2_wt.q.05_peak_9033	chr12	12223185	12224153
2_wt.q.05_peak_43066	chr8	124385918	124387019
2_wt.q.05_peak_44336	chr9	59232252	59232704
2_wt.q.05_peak_21187	chr18	12909842	12911048
2_wt.q.05_peak_34500	chr5	85996352	85997127
2_wt.q.05_peak_787	chr1	50962534	50963104
2_wt.q.05_peak_740	chr1	46841441	46842439
2_wt.q.05_peak_42523	chr8	91563322	91563944
2_wt.q.05_peak_1870	chr1	120124939	120125486
2_wt.q.05_peak_26461	chr2	117383765	117384232
2_wt.q.05_peak_37479	chr6	101482629	101483152
2_wt.q.05_peak_29556	chr3	107683320	107684341
2_wt.q.05_peak_19483	chr17	10097660	10098377
2_wt.q.05_peak_23783	chr19	53364603	53365745
2_wt.q.05_peak_1580	chr1	90347278	90347655
2_wt.q.05_peak_19373	chr17	4464502	4466190
2_wt.q.05_peak_2226	chr1	137473512	137474449
2_wt.q.05_peak_15115	chr14	105624266	105625717
2_wt.q.05_peak_38166	chr6	135827107	135829317
2_wt.q.05_peak_11214	chr13	13703291	13704145
2_wt.q.05_peak_1801	chr1	106865620	106867000
2_wt.q.05_peak_16408	chr15	59530509	59531719
2_wt.q.05_peak_44074	chr9	49740197	49740930
2_wt.q.05_peak_18394	chr16	37461235	37461759
2_wt.q.05_peak_11792	chr13	44317615	44318249
2_wt.q.05_peak_22110	chr18	60630658	60631509
2_wt.q.05_peak_19873	chr17	30457175	30458098
2_wt.q.05_peak_5210	chr10	93036239	93037000
2_wt.q.05_peak_41958	chr8	66034138	66034622
2_wt.q.05_peak_17606	chr16	5991578	5992976
2_wt.q.05_peak_17212	chr15	92579989	92580796
2_wt.q.05_peak_7562	chr11	76529478	76531832
2_wt.q.05_peak_36508	chr6	39945917	39946746
2_wt.q.05_peak_15872	chr15	32432942	32433448
2_wt.q.05_peak_11726	chr13	42782425	42783159
2_wt.q.05_peak_40705	chr7	128731470	128732256
2_wt.q.05_peak_23969	chr2	4326741	4327404
2_wt.q.05_peak_16134	chr15	42814794	42816125
2_wt.q.05_peak_28133	chr3	32043349	32044790
2_wt.q.05_peak_39757	chr7	89590402	89591311
2_wt.q.05_peak_11828	chr13	45659749	45660254
2_wt.q.05_peak_41379	chr8	27372062	27372876
2_wt.q.05_peak_39320	chr7	65092902	65094220
2_wt.q.05_peak_25118	chr2	53728326	53729485
2_wt.q.05_peak_25266	chr2	62495275	62496004
2_wt.q.05_peak_9976	chr12	70875268	70877087
2_wt.q.05_peak_45017	chr9	95321984	95323573
2_wt.q.05_peak_20093	chr17	44685174	44686048
2_wt.q.05_peak_9568	chr12	45067832	45068527
2_wt.q.05_peak_40527	chr7	122574786	122576190
2_wt.q.05_peak_24293	chr2	14764159	14764534
2_wt.q.05_peak_5214	chr10	93069840	93070795
2_wt.q.05_peak_46346	chrX	162521075	162522470
2_wt.q.05_peak_26587	chr2	121775969	121776601
2_wt.q.05_peak_44402	chr9	62222001	62222805
2_wt.q.05_peak_31740	chr4	86233279	86233747
2_wt.q.05_peak_30239	chr3	143508587	143509627
2_wt.q.05_peak_9531	chr12	43918919	43919234
2_wt.q.05_peak_8088	chr11	97383487	97384299
2_wt.q.05_peak_5649	chr10	109757216	109757959
2_wt.q.05_peak_2338	chr1	143903787	143904452
2_wt.q.05_peak_22175	chr18	61852979	61853562
2_wt.q.05_peak_35909	chr6	8645114	8645951
2_wt.q.05_peak_14850	chr14	80264720	80265955
2_wt.q.05_peak_40467	chr7	121215615	121215892
2_wt.q.05_peak_16933	chr15	80614666	80615711
2_wt.q.05_peak_785	chr1	50946561	50947479
2_wt.q.05_peak_16563	chr15	68444860	68445713
2_wt.q.05_peak_19234	chr16	94208891	94209672
2_wt.q.05_peak_13691	chr14	22445177	22446224
2_wt.q.05_peak_21704	chr18	39229078	39230815
2_wt.q.05_peak_33051	chr4	152245507	152246689
2_wt.q.05_peak_41779	chr8	54596913	54597523
2_wt.q.05_peak_36878	chr6	67302145	67302849
2_wt.q.05_peak_28929	chr3	81760623	81761219
2_wt.q.05_peak_25101	chr2	52893937	52894199
2_wt.q.05_peak_29038	chr3	85315434	85315767
2_wt.q.05_peak_35703	chr5	144922745	144923914
2_wt.q.05_peak_43708	chr9	36944548	36945412
2_wt.q.05_peak_18484	chr16	41088423	41088772
2_wt.q.05_peak_25684	chr2	78926288	78928523
2_wt.q.05_peak_2837	chr1	165558685	165559234
2_wt.q.05_peak_1569	chr1	89163846	89164392
2_wt.q.05_peak_12588	chr13	84613418	84614007
2_wt.q.05_peak_11829	chr13	45661515	45662475
2_wt.q.05_peak_22280	chr18	66123730	66124229
2_wt.q.05_peak_30313	chr3	146620088	146623142
2_wt.q.05_peak_34824	chr5	107848243	107849138
2_wt.q.05_peak_40040	chr7	100214115	100216102
2_wt.q.05_peak_11528	chr13	29234313	29235149
2_wt.q.05_peak_43301	chr9	16201984	16202983
2_wt.q.05_peak_38605	chr7	17045534	17045988
2_wt.q.05_peak_29753	chr3	118465209	118465943
2_wt.q.05_peak_13790	chr14	27444823	27446213
2_wt.q.05_peak_21702	chr18	39187490	39188172
2_wt.q.05_peak_1386	chr1	80220328	80221044
2_wt.q.05_peak_18398	chr16	37531791	37532990
2_wt.q.05_peak_2367	chr1	146231430	146232851
2_wt.q.05_peak_1139	chr1	64918678	64919746
2_wt.q.05_peak_13587	chr14	18553920	18555364
2_wt.q.05_peak_34055	chr5	54239374	54241803
2_wt.q.05_peak_18922	chr16	72544100	72544409
2_wt.q.05_peak_34141	chr5	64022634	64023822
2_wt.q.05_peak_7729	chr11	80670051	80670566
2_wt.q.05_peak_12121	chr13	58935988	58937774
2_wt.q.05_peak_12545	chr13	83607319	83608932
2_wt.q.05_peak_34133	chr5	63623766	63624596
2_wt.q.05_peak_11355	chr13	20599985	20602045
2_wt.q.05_peak_3683	chr10	10251892	10254352
2_wt.q.05_peak_13868	chr14	30124623	30126284
2_wt.q.05_peak_20564	chr17	70621714	70623126
2_wt.q.05_peak_6311	chr11	20039109	20039470
2_wt.q.05_peak_17264	chr15	94967457	94969070
2_wt.q.05_peak_9199	chr12	26012695	26013291
2_wt.q.05_peak_26963	chr2	136780079	136780729
2_wt.q.05_peak_31186	chr4	46927539	46928641
2_wt.q.05_peak_37615	chr6	108277244	108277612
2_wt.q.05_peak_2403	chr1	149882681	149883041
2_wt.q.05_peak_27670	chr2	169599816	169600930
2_wt.q.05_peak_8974	chr12	8470490	8471547
2_wt.q.05_peak_46369	chrX	166214461	166215228
2_wt.q.05_peak_37830	chr6	115320887	115323132
2_wt.q.05_peak_43674	chr9	34713022	34713689
2_wt.q.05_peak_26782	chr2	131539658	131540207
2_wt.q.05_peak_26095	chr2	102032843	102033458
2_wt.q.05_peak_33184	chr5	7139517	7140251
2_wt.q.05_peak_41549	chr8	38928588	38929175
2_wt.q.05_peak_16700	chr15	73431087	73432074
2_wt.q.05_peak_10994	chr12	117636448	117637663
2_wt.q.05_peak_24811	chr2	38263242	38263746
2_wt.q.05_peak_15169	chr14	111484680	111487761
2_wt.q.05_peak_23054	chr19	15126225	15127249
2_wt.q.05_peak_10564	chr12	97732029	97732331
2_wt.q.05_peak_35911	chr6	8659142	8659438
2_wt.q.05_peak_19513	chr17	11619110	11620016
2_wt.q.05_peak_22923	chr19	8564169	8567293
2_wt.q.05_peak_11348	chr13	20466656	20467875
2_wt.q.05_peak_31538	chr4	76380312	76381143
2_wt.q.05_peak_27981	chr3	21024297	21027223
2_wt.q.05_peak_31129	chr4	44881130	44882152
2_wt.q.05_peak_3615	chr10	7076537	7076842
2_wt.q.05_peak_22024	chr18	55910163	55910436
2_wt.q.05_peak_28526	chr3	56962263	56963699
2_wt.q.05_peak_41858	chr8	58758530	58760170
2_wt.q.05_peak_15669	chr15	22978987	22980123
2_wt.q.05_peak_14103	chr14	48074237	48074727
2_wt.q.05_peak_28158	chr3	33305677	33306965
2_wt.q.05_peak_19152	chr16	89907935	89908194
2_wt.q.05_peak_17607	chr16	5997002	5997670
2_wt.q.05_peak_466	chr1	34023074	34023593
2_wt.q.05_peak_26850	chr2	132757474	132758589
2_wt.q.05_peak_40285	chr7	112316007	112317288
2_wt.q.05_peak_22042	chr18	57439046	57439329
2_wt.q.05_peak_35314	chr5	126333069	126333617
2_wt.q.05_peak_15180	chr14	111776272	111777040
2_wt.q.05_peak_8915	chr12	5186319	5186940
2_wt.q.05_peak_10875	chr12	111087896	111089179
2_wt.q.05_peak_16254	chr15	51644281	51644761
2_wt.q.05_peak_21909	chr18	47760483	47761272
2_wt.q.05_peak_10350	chr12	85570878	85571360
2_wt.q.05_peak_2755	chr1	162107967	162109134
2_wt.q.05_peak_26965	chr2	136783281	136784872
2_wt.q.05_peak_13452	chr14	11085078	11086103
2_wt.q.05_peak_30127	chr3	137709612	137710343
2_wt.q.05_peak_23721	chr19	48101168	48101804
2_wt.q.05_peak_30519	chr3	159016818	159018097
2_wt.q.05_peak_13471	chr14	12205898	12206371
2_wt.q.05_peak_2184	chr1	136055635	136056200
2_wt.q.05_peak_37471	chr6	101366894	101367860
2_wt.q.05_peak_13239	chr13	110444697	110444962
2_wt.q.05_peak_17688	chr16	9452773	9453516
2_wt.q.05_peak_31353	chr4	59380818	59382033
2_wt.q.05_peak_238	chr1	21922303	21923379
2_wt.q.05_peak_34262	chr5	71603468	71604684
2_wt.q.05_peak_6796	chr11	43092115	43093071
2_wt.q.05_peak_2337	chr1	143830602	143831450
2_wt.q.05_peak_24130	chr2	7223506	7224462
2_wt.q.05_peak_2039	chr1	131432204	131432679
2_wt.q.05_peak_38411	chr6	148543311	148543739
2_wt.q.05_peak_27468	chr2	158712501	158712821
2_wt.q.05_peak_13449	chr14	10630568	10631624
2_wt.q.05_peak_15847	chr15	31336999	31337693
2_wt.q.05_peak_9093	chr12	15760989	15762487
2_wt.q.05_peak_6530	chr11	29794551	29795969
2_wt.q.05_peak_11319	chr13	19026865	19027895
2_wt.q.05_peak_12139	chr13	59250940	59251425
2_wt.q.05_peak_36550	chr6	42237192	42237966
2_wt.q.05_peak_19493	chr17	10770015	10770303
2_wt.q.05_peak_18613	chr16	47791240	47792113
2_wt.q.05_peak_16505	chr15	66199470	66200630
2_wt.q.05_peak_36018	chr6	17875313	17876569
2_wt.q.05_peak_18236	chr16	32853936	32854614
2_wt.q.05_peak_34342	chr5	73970024	73971001
2_wt.q.05_peak_17326	chr15	97863199	97863937
2_wt.q.05_peak_16518	chr15	66479993	66480772
2_wt.q.05_peak_15370	chr14	121615599	121615972
2_wt.q.05_peak_21241	chr18	16821014	16822124
2_wt.q.05_peak_9092	chr12	15758650	15759741
2_wt.q.05_peak_605	chr1	39313811	39314649
2_wt.q.05_peak_24855	chr2	42284215	42284703
2_wt.q.05_peak_28864	chr3	80180216	80180775
2_wt.q.05_peak_15083	chr14	103751396	103751873
2_wt.q.05_peak_18636	chr16	49909740	49910002
2_wt.q.05_peak_34670	chr5	99387476	99388494
2_wt.q.05_peak_9575	chr12	45932325	45932886
2_wt.q.05_peak_2845	chr1	166183255	166183708
2_wt.q.05_peak_25107	chr2	52978700	52978999
2_wt.q.05_peak_19476	chr17	9292125	9292517
2_wt.q.05_peak_43600	chr9	29533110	29533957
2_wt.q.05_peak_25708	chr2	80046672	80047290
2_wt.q.05_peak_11730	chr13	42803888	42805146
2_wt.q.05_peak_6720	chr11	41202435	41202815
2_wt.q.05_peak_20965	chr17	90653301	90653899
2_wt.q.05_peak_42647	chr8	101778558	101780822
2_wt.q.05_peak_26606	chr2	122683287	122684222
2_wt.q.05_peak_40917	chr7	144205352	144207262
2_wt.q.05_peak_16551	chr15	67943162	67943493
2_wt.q.05_peak_37244	chr6	90945799	90946473
2_wt.q.05_peak_14496	chr14	66265256	66266723
2_wt.q.05_peak_22550	chr18	77232065	77232779
2_wt.q.05_peak_5067	chr10	86480497	86481212
2_wt.q.05_peak_39665	chr7	83744525	83744911
2_wt.q.05_peak_11969	chr13	52817917	52819087
2_wt.q.05_peak_35569	chr5	139135157	139135792
2_wt.q.05_peak_10542	chr12	95746630	95747473
2_wt.q.05_peak_42433	chr8	86203702	86204130
2_wt.q.05_peak_18026	chr16	22483447	22484816
2_wt.q.05_peak_38181	chr6	135915171	135916229
2_wt.q.05_peak_2305	chr1	141968011	141968844
2_wt.q.05_peak_26988	chr2	138405783	138406891
2_wt.q.05_peak_27421	chr2	156915194	156915621
2_wt.q.05_peak_39427	chr7	73326270	73326903
2_wt.q.05_peak_3678	chr10	10106946	10108059
2_wt.q.05_peak_27268	chr2	151621274	151621833
2_wt.q.05_peak_28192	chr3	34572273	34572733
2_wt.q.05_peak_33255	chr5	13499849	13500590
2_wt.q.05_peak_17608	chr16	6000027	6000805
2_wt.q.05_peak_42159	chr8	72588546	72590152
2_wt.q.05_peak_43241	chr9	9949361	9949794
2_wt.q.05_peak_44332	chr9	59182497	59183106
2_wt.q.05_peak_45555	chr9	113266305	113267618
2_wt.q.05_peak_23231	chr19	24677475	24678013
2_wt.q.05_peak_15582	chr15	13667509	13667817
2_wt.q.05_peak_33376	chr5	20461497	20463040
2_wt.q.05_peak_18155	chr16	31005917	31006423
2_wt.q.05_peak_26814	chr2	132107218	132108108
2_wt.q.05_peak_12165	chr13	60522585	60524143
2_wt.q.05_peak_44645	chr9	72083765	72084786
2_wt.q.05_peak_4641	chr10	67360334	67361318
2_wt.q.05_peak_2899	chr1	168268085	168268803
2_wt.q.05_peak_24272	chr2	13409530	13410372
2_wt.q.05_peak_39079	chr7	48894400	48894939
2_wt.q.05_peak_24160	chr2	7529304	7532650
2_wt.q.05_peak_41919	chr8	64665197	64666296
2_wt.q.05_peak_26833	chr2	132513275	132514790
2_wt.q.05_peak_45759	chr9	122592548	122593385
2_wt.q.05_peak_3308	chr1	183084627	183085088
2_wt.q.05_peak_17348	chr15	98689145	98690368
2_wt.q.05_peak_26800	chr2	131840746	131841451
2_wt.q.05_peak_40821	chr7	138620713	138621336
2_wt.q.05_peak_11833	chr13	45750562	45751456
2_wt.q.05_peak_6675	chr11	36486083	36486483
2_wt.q.05_peak_10606	chr12	98905442	98906055
2_wt.q.05_peak_7087	chr11	57039085	57039525
2_wt.q.05_peak_1295	chr1	75290163	75290760
2_wt.q.05_peak_8508	chr11	108054388	108054733
2_wt.q.05_peak_4617	chr10	66433214	66434412
2_wt.q.05_peak_12017	chr13	54755041	54755794
2_wt.q.05_peak_28987	chr3	84439873	84440349
2_wt.q.05_peak_5631	chr10	109561372	109562029
2_wt.q.05_peak_22508	chr18	74921374	74922237
2_wt.q.05_peak_21783	chr18	41355364	41355973
2_wt.q.05_peak_43647	chr9	32191913	32193291
2_wt.q.05_peak_14382	chr14	64219459	64220955
2_wt.q.05_peak_20451	chr17	66351883	66353000
2_wt.q.05_peak_40540	chr7	122728068	122728885
2_wt.q.05_peak_8953	chr12	7028337	7029234
2_wt.q.05_peak_32065	chr4	105098100	105099160
2_wt.q.05_peak_35916	chr6	9078231	9078758
2_wt.q.05_peak_17988	chr16	21606882	21607509
2_wt.q.05_peak_16648	chr15	70357441	70358949
2_wt.q.05_peak_3310	chr1	183151292	183152069
2_wt.q.05_peak_14755	chr14	76764132	76765601
2_wt.q.05_peak_18114	chr16	28632003	28632274
2_wt.q.05_peak_13050	chr13	102746805	102748580
2_wt.q.05_peak_33055	chr4	152349989	152351550
2_wt.q.05_peak_33313	chr5	17695571	17696324
2_wt.q.05_peak_3225	chr1	179939969	179941019
2_wt.q.05_peak_3718	chr10	12019225	12019730
2_wt.q.05_peak_41215	chr8	17358993	17359310
2_wt.q.05_peak_270	chr1	23097956	23098926
2_wt.q.05_peak_23096	chr19	17983154	17983462
2_wt.q.05_peak_37488	chr6	101534310	101534881
2_wt.q.05_peak_14763	chr14	76885601	76888022
2_wt.q.05_peak_33238	chr5	9912887	9913439
2_wt.q.05_peak_32019	chr4	103178750	103180018
2_wt.q.05_peak_12128	chr13	59073014	59075226
2_wt.q.05_peak_15907	chr15	34829299	34830915
2_wt.q.05_peak_33556	chr5	25773701	25775015
2_wt.q.05_peak_17655	chr16	7228883	7229640
2_wt.q.05_peak_5790	chr10	116371357	116371923
2_wt.q.05_peak_43115	chr8	126257727	126258187
2_wt.q.05_peak_42690	chr8	104126695	104127763
2_wt.q.05_peak_12961	chr13	99303604	99304305
2_wt.q.05_peak_1671	chr1	97552494	97553867
2_wt.q.05_peak_8352	chr11	103667515	103667902
2_wt.q.05_peak_8756	chr11	118739210	118740103
2_wt.q.05_peak_41527	chr8	36593622	36594378
2_wt.q.05_peak_13551	chr14	16599133	16599657
2_wt.q.05_peak_14637	chr14	72844661	72845034
2_wt.q.05_peak_45764	chr9	122609513	122611595
2_wt.q.05_peak_43796	chr9	40348656	40349040
2_wt.q.05_peak_11271	chr13	16671195	16671740
2_wt.q.05_peak_45185	chr9	104256169	104257032
2_wt.q.05_peak_40097	chr7	101481857	101483104
2_wt.q.05_peak_5352	chr10	98929129	98931732
2_wt.q.05_peak_15406	chr14	124298861	124300075
2_wt.q.05_peak_26959	chr2	136752197	136752825
2_wt.q.05_peak_34465	chr5	82733272	82734263
2_wt.q.05_peak_6633	chr11	34421223	34421839
2_wt.q.05_peak_4693	chr10	69578936	69580273
2_wt.q.05_peak_23933	chr19	60463860	60464455
2_wt.q.05_peak_25987	chr2	93084488	93085165
2_wt.q.05_peak_6771	chr11	42528142	42531106
2_wt.q.05_peak_11638	chr13	37158386	37159594
2_wt.q.05_peak_16634	chr15	69275241	69275990
2_wt.q.05_peak_34717	chr5	102109745	102110790
2_wt.q.05_peak_45787	chr9	123503332	123504491
2_wt.q.05_peak_32255	chr4	118085011	118085385
2_wt.q.05_peak_41809	chr8	55007291	55007859
2_wt.q.05_peak_20977	chr17	90817699	90818386
2_wt.q.05_peak_32318	chr4	121008312	121009792
2_wt.q.05_peak_33372	chr5	20362919	20363950
2_wt.q.05_peak_35727	chr5	146628397	146628936
2_wt.q.05_peak_34587	chr5	93137056	93137594
2_wt.q.05_peak_14071	chr14	46941518	46942087
2_wt.q.05_peak_29544	chr3	107424490	107425048
2_wt.q.05_peak_43043	chr8	123729375	123730230
2_wt.q.05_peak_6363	chr11	22499255	22500226
2_wt.q.05_peak_16568	chr15	68491780	68492299
2_wt.q.05_peak_2675	chr1	159386293	159386718
2_wt.q.05_peak_3932	chr10	21684100	21684806
2_wt.q.05_peak_28705	chr3	68760958	68761393
2_wt.q.05_peak_32853	chr4	140234007	140234934
2_wt.q.05_peak_37444	chr6	100206461	100207529
2_wt.q.05_peak_29970	chr3	129620935	129621882
2_wt.q.05_peak_14558	chr14	68223665	68224509
2_wt.q.05_peak_28805	chr3	79023447	79023841
2_wt.q.05_peak_9920	chr12	70057699	70058503
2_wt.q.05_peak_5386	chr10	99169146	99170453
2_wt.q.05_peak_23148	chr19	21509445	21510250
2_wt.q.05_peak_21370	chr18	25615670	25616670
2_wt.q.05_peak_31185	chr4	46885680	46886603
2_wt.q.05_peak_30829	chr4	24924520	24925395
2_wt.q.05_peak_33691	chr5	33029698	33030972
2_wt.q.05_peak_43422	chr9	24315475	24316371
2_wt.q.05_peak_37068	chr6	84429091	84429834
2_wt.q.05_peak_37627	chr6	108330339	108333311
2_wt.q.05_peak_2966	chr1	170356657	170357447
2_wt.q.05_peak_11836	chr13	45827387	45827956
2_wt.q.05_peak_843	chr1	52331322	52332167
2_wt.q.05_peak_20165	chr17	47177495	47178816
2_wt.q.05_peak_34082	chr5	57841393	57841784
2_wt.q.05_peak_31518	chr4	74587093	74587632
2_wt.q.05_peak_42834	chr8	110936296	110936786
2_wt.q.05_peak_40735	chr7	131909572	131910093
2_wt.q.05_peak_18860	chr16	67515257	67516521
2_wt.q.05_peak_29019	chr3	85133453	85134024
2_wt.q.05_peak_33861	chr5	42270426	42270703
2_wt.q.05_peak_33715	chr5	34241963	34242781
2_wt.q.05_peak_17304	chr15	95906452	95907864
2_wt.q.05_peak_4316	chr10	43093340	43093972
2_wt.q.05_peak_9495	chr12	40414547	40415764
2_wt.q.05_peak_34031	chr5	53365991	53367414
2_wt.q.05_peak_11318	chr13	19025037	19025829
2_wt.q.05_peak_13437	chr14	9787141	9787815
2_wt.q.05_peak_37153	chr6	87182992	87183656
2_wt.q.05_peak_36394	chr6	36605776	36606138
2_wt.q.05_peak_34221	chr5	67952992	67953526
2_wt.q.05_peak_28351	chr3	48845967	48846751
2_wt.q.05_peak_36702	chr6	54253598	54254053
2_wt.q.05_peak_29658	chr3	115604026	115604317
2_wt.q.05_peak_3112	chr1	175870112	175870920
2_wt.q.05_peak_17289	chr15	95491766	95492439
2_wt.q.05_peak_4110	chr10	32063326	32064486
2_wt.q.05_peak_12587	chr13	84612582	84613152
2_wt.q.05_peak_33803	chr5	37254315	37254721
2_wt.q.05_peak_5656	chr10	109863942	109864842
2_wt.q.05_peak_5597	chr10	108979031	108980506
2_wt.q.05_peak_36524	chr6	40607172	40608085
2_wt.q.05_peak_44454	chr9	63780222	63780870
2_wt.q.05_peak_7287	chr11	67228405	67230737
2_wt.q.05_peak_20074	chr17	43904143	43904686
2_wt.q.05_peak_43908	chr9	43149753	43150528
2_wt.q.05_peak_34474	chr5	83826432	83827127
2_wt.q.05_peak_18016	chr16	22406583	22407939
2_wt.q.05_peak_29396	chr3	98415593	98415923
2_wt.q.05_peak_43271	chr9	14288151	14289391
2_wt.q.05_peak_28950	chr3	82250125	82251458
2_wt.q.05_peak_45249	chr9	106318086	106318686
2_wt.q.05_peak_13499	chr14	12923345	12924321
2_wt.q.05_peak_28424	chr3	52975034	52975795
2_wt.q.05_peak_5464	chr10	105288214	105288855
2_wt.q.05_peak_5222	chr10	93144374	93145395
2_wt.q.05_peak_34557	chr5	91653430	91654861
2_wt.q.05_peak_13826	chr14	27983623	27985248
2_wt.q.05_peak_25956	chr2	92445911	92446705
[truncated: 594 more rows]

## Sheet: MYT1L_PFC_Poised_Enhancer
PeakID	Chr	Start	End
2_wt.q.05_peak_42725	chr8	105593698	105594234
2_wt.q.05_peak_4125	chr10	33019746	33020035
2_wt.q.05_peak_32177	chr4	111215220	111215801
2_wt.q.05_peak_36927	chr6	72048369	72049050
2_wt.q.05_peak_18614	chr16	47846646	47847450
2_wt.q.05_peak_13402	chr13	119784152	119784963
2_wt.q.05_peak_11143	chr13	10189713	10190066
2_wt.q.05_peak_39229	chr7	58563791	58564093
2_wt.q.05_peak_15136	chr14	107550270	107550977
2_wt.q.05_peak_31698	chr4	84919300	84920129
2_wt.q.05_peak_41053	chr8	11252884	11253989
2_wt.q.05_peak_45977	chrX	58117920	58118530
2_wt.q.05_peak_22726	chr18	89567063	89568543
2_wt.q.05_peak_12640	chr13	89414967	89415232
2_wt.q.05_peak_2916	chr1	168686740	168687564
2_wt.q.05_peak_12932	chr13	98809872	98810674
2_wt.q.05_peak_2380	chr1	147658198	147658847
2_wt.q.05_peak_17849	chr16	16855442	16855977
2_wt.q.05_peak_7971	chr11	92040047	92040746
2_wt.q.05_peak_3616	chr10	7117876	7118662
2_wt.q.05_peak_28825	chr3	79279239	79279839
2_wt.q.05_peak_25596	chr2	74463256	74464135
2_wt.q.05_peak_43659	chr9	33327441	33328249
2_wt.q.05_peak_30909	chr4	29307478	29307804
2_wt.q.05_peak_471	chr1	34273122	34274160
2_wt.q.05_peak_32003	chr4	102607752	102608465
2_wt.q.05_peak_44804	chr9	79520032	79521117
2_wt.q.05_peak_35931	chr6	12084422	12085201
2_wt.q.05_peak_8595	chr11	111175247	111175696
2_wt.q.05_peak_3174	chr1	177411456	177411780
2_wt.q.05_peak_15173	chr14	111649588	111650162
2_wt.q.05_peak_43815	chr9	40555133	40555830
2_wt.q.05_peak_6458	chr11	26013436	26014441
2_wt.q.05_peak_23383	chr19	33239379	33240950
2_wt.q.05_peak_35425	chr5	132028035	132028536
2_wt.q.05_peak_19403	chr17	5345464	5346134
2_wt.q.05_peak_26654	chr2	126682839	126683156
2_wt.q.05_peak_44136	chr9	52158820	52159429
2_wt.q.05_peak_41106	chr8	13882621	13883099
2_wt.q.05_peak_34096	chr5	59847328	59848146
2_wt.q.05_peak_12443	chr13	79980223	79980691
2_wt.q.05_peak_7890	chr11	87371583	87372125
2_wt.q.05_peak_281	chr1	23409428	23410410
2_wt.q.05_peak_31964	chr4	101516617	101517261
2_wt.q.05_peak_36307	chr6	31921586	31922010
2_wt.q.05_peak_8964	chr12	7444870	7445352
2_wt.q.05_peak_2283	chr1	140456095	140457733
2_wt.q.05_peak_33265	chr5	14415098	14415605
2_wt.q.05_peak_20921	chr17	89563892	89564255
2_wt.q.05_peak_25787	chr2	84462501	84462835
2_wt.q.05_peak_41898	chr8	61396061	61396690
2_wt.q.05_peak_2051	chr1	131820809	131821638
2_wt.q.05_peak_23100	chr19	18269475	18270135
2_wt.q.05_peak_23091	chr19	17678101	17679257
2_wt.q.05_peak_7973	chr11	93026215	93026577
2_wt.q.05_peak_3655	chr10	9602593	9603017
2_wt.q.05_peak_30097	chr3	136963199	136963664
2_wt.q.05_peak_30901	chr4	28871095	28871710
2_wt.q.05_peak_18582	chr16	45350959	45351248
2_wt.q.05_peak_46003	chrX	69008938	69009839
2_wt.q.05_peak_15066	chr14	103386916	103387420
2_wt.q.05_peak_13886	chr14	30383133	30383754
2_wt.q.05_peak_8594	chr11	111104428	111105260
2_wt.q.05_peak_44708	chr9	75124337	75124609
2_wt.q.05_peak_6907	chr11	49456658	49457266
2_wt.q.05_peak_31401	chr4	65772975	65773784
2_wt.q.05_peak_34604	chr5	96416502	96417304
2_wt.q.05_peak_38262	chr6	139364490	139365992
2_wt.q.05_peak_12589	chr13	84624486	84624802
2_wt.q.05_peak_40166	chr7	107496726	107497000
2_wt.q.05_peak_7081	chr11	56809224	56810806
2_wt.q.05_peak_13734	chr14	23992966	23993488
2_wt.q.05_peak_16039	chr15	39427484	39428099
2_wt.q.05_peak_14916	chr14	92311051	92312484
2_wt.q.05_peak_8606	chr11	112120865	112121862
2_wt.q.05_peak_41056	chr8	11371905	11372576
2_wt.q.05_peak_4172	chr10	37798981	37799267
2_wt.q.05_peak_39467	chr7	74970065	74970997
2_wt.q.05_peak_18383	chr16	37301294	37302757
2_wt.q.05_peak_6086	chr11	3853149	3853526
2_wt.q.05_peak_34251	chr5	71078597	71079073
2_wt.q.05_peak_12285	chr13	69294745	69295067
2_wt.q.05_peak_3239	chr1	180266536	180267531
2_wt.q.05_peak_37595	chr6	108057903	108058790
2_wt.q.05_peak_13142	chr13	106525755	106526305
2_wt.q.05_peak_3621	chr10	7581645	7582150
2_wt.q.05_peak_2642	chr1	158256124	158256684
2_wt.q.05_peak_15403	chr14	124179988	124180836
2_wt.q.05_peak_17897	chr16	17692250	17693196
2_wt.q.05_peak_36964	chr6	74206472	74207010
2_wt.q.05_peak_26861	chr2	133550353	133550665
2_wt.q.05_peak_4354	chr10	46487348	46487620
2_wt.q.05_peak_3093	chr1	175187983	175188652
2_wt.q.05_peak_5449	chr10	102622628	102623266
2_wt.q.05_peak_34243	chr5	70501144	70501907
2_wt.q.05_peak_9746	chr12	57145710	57146445
2_wt.q.05_peak_22595	chr18	79195312	79195644
2_wt.q.05_peak_37654	chr6	108738315	108739022
2_wt.q.05_peak_30011	chr3	133326910	133327372
2_wt.q.05_peak_19335	chr16	97297103	97297366
2_wt.q.05_peak_21850	chr18	44632444	44632863
2_wt.q.05_peak_30723	chr4	15550326	15550810
2_wt.q.05_peak_10341	chr12	85299065	85299510
2_wt.q.05_peak_2639	chr1	158243767	158244233
2_wt.q.05_peak_13348	chr13	116879692	116880162
2_wt.q.05_peak_16257	chr15	51811354	51811629
2_wt.q.05_peak_2441	chr1	152368997	152369312
2_wt.q.05_peak_12188	chr13	63023103	63023832
2_wt.q.05_peak_23187	chr19	23044376	23045350
2_wt.q.05_peak_30844	chr4	25698384	25699681
2_wt.q.05_peak_9836	chr12	65068393	65068857
2_wt.q.05_peak_10441	chr12	89325403	89326382
2_wt.q.05_peak_30334	chr3	148842765	148843175
2_wt.q.05_peak_40378	chr7	117174656	117175768
2_wt.q.05_peak_32510	chr4	128712583	128713714
2_wt.q.05_peak_15168	chr14	111397028	111397482
2_wt.q.05_peak_19092	chr16	84955043	84955890
2_wt.q.05_peak_22019	chr18	55290640	55290998
2_wt.q.05_peak_13082	chr13	103958609	103959556
2_wt.q.05_peak_19121	chr16	86535793	86536508
2_wt.q.05_peak_4169	chr10	37739436	37739710
2_wt.q.05_peak_33954	chr5	49099073	49100015
2_wt.q.05_peak_15335	chr14	120891002	120891480
2_wt.q.05_peak_34413	chr5	77826210	77826880
2_wt.q.05_peak_39463	chr7	74376416	74376704
2_wt.q.05_peak_27688	chr2	171946776	171947322
2_wt.q.05_peak_15087	chr14	105089265	105089926
2_wt.q.05_peak_4060	chr10	29198586	29198997
2_wt.q.05_peak_32103	chr4	107766086	107766403
2_wt.q.05_peak_3369	chr1	187785126	187785800
2_wt.q.05_peak_15217	chr14	116415454	116416162
2_wt.q.05_peak_29885	chr3	126397418	126398101
2_wt.q.05_peak_22599	chr18	79836622	79837165
2_wt.q.05_peak_35448	chr5	133708631	133709466
2_wt.q.05_peak_42267	chr8	81080024	81080329
2_wt.q.05_peak_13827	chr14	28000808	28001735
2_wt.q.05_peak_18789	chr16	63653468	63654229
2_wt.q.05_peak_1030	chr1	59804640	59805558
2_wt.q.05_peak_35829	chr5	150815600	150815985
2_wt.q.05_peak_882	chr1	53936361	53936855
2_wt.q.05_peak_3075	chr1	173450842	173451248
2_wt.q.05_peak_41497	chr8	35772919	35773859
2_wt.q.05_peak_15084	chr14	103865082	103865556
2_wt.q.05_peak_41024	chr8	10114388	10115762
2_wt.q.05_peak_9835	chr12	65066031	65068002
2_wt.q.05_peak_27819	chr3	7449344	7449739
2_wt.q.05_peak_40758	chr7	132501585	132502667
2_wt.q.05_peak_37426	chr6	99269644	99270616
2_wt.q.05_peak_16038	chr15	39401413	39402899
2_wt.q.05_peak_41363	chr8	26244048	26244458
2_wt.q.05_peak_37004	chr6	79619622	79620525
2_wt.q.05_peak_35926	chr6	11960773	11961327
2_wt.q.05_peak_25372	chr2	66350055	66351085
2_wt.q.05_peak_7970	chr11	91944597	91944886
2_wt.q.05_peak_38371	chr6	146124777	146125112
2_wt.q.05_peak_21152	chr18	11995916	11996645
2_wt.q.05_peak_43964	chr9	44911368	44911869
2_wt.q.05_peak_3366	chr1	187270279	187270786
2_wt.q.05_peak_10840	chr12	109598887	109599731
2_wt.q.05_peak_7255	chr11	65215164	65215907
2_wt.q.05_peak_37364	chr6	94848235	94849063
2_wt.q.05_peak_3909	chr10	21024847	21025317
2_wt.q.05_peak_41866	chr8	59499627	59500136
2_wt.q.05_peak_31421	chr4	68387006	68387624
2_wt.q.05_peak_28740	chr3	70307314	70308240
2_wt.q.05_peak_2778	chr1	164118111	164118430
2_wt.q.05_peak_4356	chr10	46663022	46663678
2_wt.q.05_peak_18071	chr16	25660742	25661132
2_wt.q.05_peak_4308	chr10	42816184	42817141
2_wt.q.05_peak_37673	chr6	110538325	110539533
2_wt.q.05_peak_2355	chr1	144765971	144766536
2_wt.q.05_peak_2768	chr1	163035723	163036099
2_wt.q.05_peak_20059	chr17	42586316	42586626
2_wt.q.05_peak_15676	chr15	23552796	23553621
2_wt.q.05_peak_2481	chr1	153641716	153642650
2_wt.q.05_peak_10281	chr12	82815632	82816453
2_wt.q.05_peak_13183	chr13	108775778	108776774
2_wt.q.05_peak_21979	chr18	53346559	53346979
2_wt.q.05_peak_13643	chr14	20940712	20940971
2_wt.q.05_peak_14468	chr14	65407642	65407989
2_wt.q.05_peak_9791	chr12	59343326	59344070
2_wt.q.05_peak_32933	chr4	148509390	148510293
2_wt.q.05_peak_30954	chr4	33467196	33468234
2_wt.q.05_peak_41085	chr8	12780887	12781967
2_wt.q.05_peak_31856	chr4	94642931	94643246
2_wt.q.05_peak_3916	chr10	21382798	21383091
2_wt.q.05_peak_34655	chr5	98997750	98998251
2_wt.q.05_peak_9010	chr12	11516788	11517184
2_wt.q.05_peak_14565	chr14	68946113	68946462
2_wt.q.05_peak_26365	chr2	114542627	114543102
2_wt.q.05_peak_36318	chr6	32603571	32604271
2_wt.q.05_peak_18581	chr16	45348034	45348455
2_wt.q.05_peak_35957	chr6	14018764	14019689
2_wt.q.05_peak_19090	chr16	84904652	84905308
2_wt.q.05_peak_12278	chr13	68964325	68964734
2_wt.q.05_peak_30701	chr4	14087873	14088620
2_wt.q.05_peak_9714	chr12	54223075	54223697
2_wt.q.05_peak_41943	chr8	65159172	65159492
2_wt.q.05_peak_9390	chr12	33403212	33403507
2_wt.q.05_peak_14920	chr14	92955332	92956079
2_wt.q.05_peak_13574	chr14	17989110	17989380
2_wt.q.05_peak_22457	chr18	70784156	70784904
2_wt.q.05_peak_12653	chr13	90325083	90325590
2_wt.q.05_peak_24856	chr2	42307643	42308350
2_wt.q.05_peak_16439	chr15	62755577	62756117
2_wt.q.05_peak_3674	chr10	9992883	9993224
2_wt.q.05_peak_45999	chrX	68245401	68246194
2_wt.q.05_peak_23013	chr19	11915648	11916196
2_wt.q.05_peak_1218	chr1	70923170	70924199
2_wt.q.05_peak_42218	chr8	77232225	77232820
2_wt.q.05_peak_15029	chr14	102210698	102211277
[truncated: 2,880 more rows]
