# Supplementary material for: MYT1L is required for suppressing earlier neuronal development programs in the adult mouse brain
Source: Genome Res. 2023 Apr;33(4):541–56. doi: 10.1101/gr.277413.122 (PMC10234307; doi:10.1101/gr.277413.122)
Supplement: Supplemental Material [file supp_gr.277413.122_Supplemental_Table_S3.xlsx]

## Sheet: E14_All_Active_Enhancer
Supplemental Table S3. Enhancer annotations
PeakID	Chr	Start	End
h3k4me1.q.05_peak_57377	chr19	53781010	53781816
h3k4me1.q.05_peak_55880	chr19	24259826	24260046
h3k4me1.q.05_peak_71369	chr3	103924214	103926230
h3k4me1.q.05_peak_80272	chr4	133170293	133171237
h3k4me1.q.05_peak_63439	chr2	114723183	114725595
h3k4me1.q.05_peak_65850	chr2	159039812	159040984
h3k4me1.q.05_peak_3866	chr1	91600526	91601693
h3k4me1.q.05_peak_95627	chr6	144469358	144470689
h3k4me1.q.05_peak_80186	chr4	131828813	131829334
h3k4me1.q.05_peak_52694	chr18	47282671	47283011
h3k4me1.q.05_peak_29186	chr13	54929883	54936980
h3k4me1.q.05_peak_113351	chr9	107484064	107487103
h3k4me1.q.05_peak_84419	chr5	66653983	66655001
h3k4me1.q.05_peak_6693	chr1	163255834	163256541
h3k4me1.q.05_peak_19323	chr11	94281498	94283345
h3k4me1.q.05_peak_83031	chr5	35146662	35148621
h3k4me1.q.05_peak_104862	chr8	69920460	69921043
h3k4me1.q.05_peak_73778	chr3	150610071	150612249
h3k4me1.q.05_peak_20483	chr11	112987181	112993159
h3k4me1.q.05_peak_84711	chr5	73167251	73169574
h3k4me1.q.05_peak_44674	chr16	57900446	57901957
h3k4me1.q.05_peak_90282	chr6	30920423	30922052
h3k4me1.q.05_peak_77950	chr4	91214887	91215708
h3k4me1.q.05_peak_36178	chr14	97958941	97965650
h3k4me1.q.05_peak_49487	chr17	69228714	69232555
h3k4me1.q.05_peak_84813	chr5	74405014	74406664
h3k4me1.q.05_peak_99316	chr7	96473307	96476282
h3k4me1.q.05_peak_17175	chr11	54056586	54061054
h3k4me1.q.05_peak_45652	chr16	81220805	81225317
h3k4me1.q.05_peak_44544	chr16	54245825	54247416
h3k4me1.q.05_peak_81142	chr4	148471142	148471479
h3k4me1.q.05_peak_95393	chr6	140665710	140668360
h3k4me1.q.05_peak_81233	chr4	149364874	149366468
h3k4me1.q.05_peak_115441	chrX	73870942	73873529
h3k4me1.q.05_peak_65919	chr2	160608791	160610675
h3k4me1.q.05_peak_55137	chr19	7126292	7131026
h3k4me1.q.05_peak_27977	chr13	34575422	34576396
h3k4me1.q.05_peak_26941	chr13	10086217	10086561
h3k4me1.q.05_peak_5917	chr1	150975381	150978485
h3k4me1.q.05_peak_53864	chr18	69380221	69380512
h3k4me1.q.05_peak_36380	chr14	101500334	101503210
h3k4me1.q.05_peak_42343	chr16	11668717	11669263
h3k4me1.q.05_peak_103509	chr8	36132019	36134809
h3k4me1.q.05_peak_89712	chr6	18372851	18373726
h3k4me1.q.05_peak_95037	chr6	134126973	134129068
h3k4me1.q.05_peak_44469	chr16	52186442	52187181
h3k4me1.q.05_peak_43481	chr16	34483533	34486701
h3k4me1.q.05_peak_30687	chr13	92636474	92637737
h3k4me1.q.05_peak_88720	chr5	144555945	144559338
h3k4me1.q.05_peak_47145	chr17	13546873	13547075
h3k4me1.q.05_peak_43316	chr16	31962783	31963116
h3k4me1.q.05_peak_104826	chr8	69155827	69163728
h3k4me1.q.05_peak_77755	chr4	87501865	87502791
h3k4me1.q.05_peak_59740	chr2	37943715	37946955
h3k4me1.q.05_peak_27015	chr13	13572651	13575505
h3k4me1.q.05_peak_52436	chr18	42976414	42976839
h3k4me1.q.05_peak_105319	chr8	80807417	80809590
h3k4me1.q.05_peak_25855	chr12	102678111	102681161
h3k4me1.q.05_peak_78285	chr4	98039832	98040169
h3k4me1.q.05_peak_87010	chr5	117668859	117670420
h3k4me1.q.05_peak_47713	chr17	28930128	28931181
h3k4me1.q.05_peak_79784	chr4	126248454	126250242
h3k4me1.q.05_peak_44095	chr16	44564147	44566369
h3k4me1.q.05_peak_6539	chr1	160277944	160281806
h3k4me1.q.05_peak_83155	chr5	36851432	36852708
h3k4me1.q.05_peak_99236	chr7	95733187	95735278
h3k4me1.q.05_peak_68271	chr3	32347186	32348856
h3k4me1.q.05_peak_62869	chr2	102219926	102220745
h3k4me1.q.05_peak_10134	chr10	39539616	39543845
h3k4me1.q.05_peak_14254	chr10	120025239	120027777
h3k4me1.q.05_peak_76240	chr4	53314454	53319233
h3k4me1.q.05_peak_5594	chr1	138243974	138246022
h3k4me1.q.05_peak_66223	chr2	165743903	165746881
h3k4me1.q.05_peak_78849	chr4	107084259	107085306
h3k4me1.q.05_peak_101025	chr7	130183609	130184967
h3k4me1.q.05_peak_71247	chr3	101577235	101578086
h3k4me1.q.05_peak_111740	chr9	72967979	72969285
h3k4me1.q.05_peak_3898	chr1	92135893	92137871
h3k4me1.q.05_peak_1105	chr1	36859972	36862369
h3k4me1.q.05_peak_111906	chr9	77525036	77530905
h3k4me1.q.05_peak_25644	chr12	99473110	99475153
h3k4me1.q.05_peak_57040	chr19	47188095	47189336
h3k4me1.q.05_peak_25361	chr12	93218701	93221588
h3k4me1.q.05_peak_38606	chr15	37844667	37846106
h3k4me1.q.05_peak_28116	chr13	37239782	37240985
h3k4me1.q.05_peak_13929	chr10	113939138	113940576
h3k4me1.q.05_peak_9032	chr10	13688070	13689895
h3k4me1.q.05_peak_21536	chr12	7328241	7329234
h3k4me1.q.05_peak_111738	chr9	72931070	72931768
h3k4me1.q.05_peak_54016	chr18	72103669	72109219
h3k4me1.q.05_peak_63324	chr2	112209943	112211089
h3k4me1.q.05_peak_24058	chr12	70429752	70432053
h3k4me1.q.05_peak_41077	chr15	88378934	88382128
h3k4me1.q.05_peak_105881	chr8	90575541	90578800
h3k4me1.q.05_peak_50280	chr17	84744804	84752424
h3k4me1.q.05_peak_97794	chr7	65779607	65782761
h3k4me1.q.05_peak_100586	chr7	120647451	120648553
h3k4me1.q.05_peak_1937	chr1	56732263	56733568
h3k4me1.q.05_peak_104324	chr8	55012101	55013830
h3k4me1.q.05_peak_35441	chr14	77504222	77507154
h3k4me1.q.05_peak_24896	chr12	84540659	84543101
h3k4me1.q.05_peak_83107	chr5	36174007	36176126
h3k4me1.q.05_peak_53719	chr18	66780576	66783928
h3k4me1.q.05_peak_45527	chr16	77787013	77790748
h3k4me1.q.05_peak_73970	chr3	154413855	154414333
h3k4me1.q.05_peak_11691	chr10	71473062	71474509
h3k4me1.q.05_peak_9487	chr10	23146500	23149469
h3k4me1.q.05_peak_7716	chr1	181147241	181148351
h3k4me1.q.05_peak_40978	chr15	86382485	86383661
h3k4me1.q.05_peak_30097	chr13	77547137	77549388
h3k4me1.q.05_peak_104665	chr8	64495544	64497169
h3k4me1.q.05_peak_78710	chr4	104715116	104720782
h3k4me1.q.05_peak_19044	chr11	88484446	88486375
h3k4me1.q.05_peak_113223	chr9	105342215	105343413
h3k4me1.q.05_peak_23972	chr12	69215297	69215860
h3k4me1.q.05_peak_87040	chr5	118044579	118045015
h3k4me1.q.05_peak_110155	chr9	47361560	47363924
h3k4me1.q.05_peak_49955	chr17	79543452	79545208
h3k4me1.q.05_peak_74057	chr3	156751770	156756303
h3k4me1.q.05_peak_3379	chr1	82202668	82204890
h3k4me1.q.05_peak_59769	chr2	38194283	38198773
h3k4me1.q.05_peak_68413	chr3	35104269	35106324
h3k4me1.q.05_peak_53115	chr18	56013900	56017605
h3k4me1.q.05_peak_21443	chr12	5252239	5256314
h3k4me1.q.05_peak_95712	chr6	145585104	145586286
h3k4me1.q.05_peak_51549	chr18	25337557	25338218
h3k4me1.q.05_peak_72953	chr3	136831945	136837313
h3k4me1.q.05_peak_52002	chr18	35038564	35038765
h3k4me1.q.05_peak_78691	chr4	104609971	104611183
h3k4me1.q.05_peak_33427	chr14	32222417	32222777
h3k4me1.q.05_peak_73575	chr3	147180130	147184686
h3k4me1.q.05_peak_107001	chr8	112921328	112923053
h3k4me1.q.05_peak_6028	chr1	152409445	152411853
h3k4me1.q.05_peak_55313	chr19	10695101	10697578
h3k4me1.q.05_peak_38182	chr15	30190372	30192957
h3k4me1.q.05_peak_15487	chr11	20320310	20323330
h3k4me1.q.05_peak_18612	chr11	81587789	81596260
h3k4me1.q.05_peak_107876	chr8	125658189	125659908
h3k4me1.q.05_peak_34640	chr14	64146013	64147259
h3k4me1.q.05_peak_111142	chr9	62510305	62511914
h3k4me1.q.05_peak_43281	chr16	31498414	31503850
h3k4me1.q.05_peak_87041	chr5	118056847	118058349
h3k4me1.q.05_peak_95012	chr6	129543931	129544365
h3k4me1.q.05_peak_87143	chr5	118943821	118947115
h3k4me1.q.05_peak_80017	chr4	129993982	129995866
h3k4me1.q.05_peak_32781	chr14	21136468	21139226
h3k4me1.q.05_peak_32860	chr14	21705993	21707986
h3k4me1.q.05_peak_67672	chr3	18161818	18165594
h3k4me1.q.05_peak_90950	chr6	46611238	46614433
h3k4me1.q.05_peak_6040	chr1	152559781	152562068
h3k4me1.q.05_peak_46348	chr16	94587309	94591514
h3k4me1.q.05_peak_6378	chr1	157511623	157514697
h3k4me1.q.05_peak_96491	chr7	29345159	29346881
h3k4me1.q.05_peak_72467	chr3	127293104	127296228
h3k4me1.q.05_peak_37238	chr14	122347795	122350652
h3k4me1.q.05_peak_113962	chr9	119834758	119836784
h3k4me1.q.05_peak_71917	chr3	116304752	116306212
h3k4me1.q.05_peak_91205	chr6	51051388	51054618
h3k4me1.q.05_peak_57984	chr2	4568308	4569748
h3k4me1.q.05_peak_39984	chr15	72041983	72043565
h3k4me1.q.05_peak_8128	chr1	188116528	188120360
h3k4me1.q.05_peak_110766	chr9	58012122	58014103
h3k4me1.q.05_peak_2411	chr1	64187697	64194244
h3k4me1.q.05_peak_102560	chr8	15148381	15150259
h3k4me1.q.05_peak_84372	chr5	66243998	66244677
h3k4me1.q.05_peak_51725	chr18	29266814	29268718
h3k4me1.q.05_peak_23567	chr12	54186729	54189056
h3k4me1.q.05_peak_109565	chr9	37782111	37783647
h3k4me1.q.05_peak_51891	chr18	33432326	33434408
h3k4me1.q.05_peak_92549	chr6	85286955	85288546
h3k4me1.q.05_peak_32084	chr13	116521184	116524803
h3k4me1.q.05_peak_999	chr1	34696060	34697282
h3k4me1.q.05_peak_99201	chr7	94856323	94857302
h3k4me1.q.05_peak_96096	chr7	16412781	16412985
h3k4me1.q.05_peak_88079	chr5	133717603	133719663
h3k4me1.q.05_peak_68154	chr3	29576336	29579415
h3k4me1.q.05_peak_32214	chr14	8208461	8210393
h3k4me1.q.05_peak_88471	chr5	140263467	140265521
h3k4me1.q.05_peak_48665	chr17	49898595	49900107
h3k4me1.q.05_peak_6651	chr1	162298208	162303211
h3k4me1.q.05_peak_58780	chr2	20954935	20957169
h3k4me1.q.05_peak_83011	chr5	34729219	34730329
h3k4me1.q.05_peak_29331	chr13	56827158	56829582
h3k4me1.q.05_peak_95147	chr6	135549283	135552726
h3k4me1.q.05_peak_80397	chr4	134937392	134938427
h3k4me1.q.05_peak_95529	chr6	143414377	143414905
h3k4me1.q.05_peak_40616	chr15	82144178	82144692
h3k4me1.q.05_peak_30739	chr13	93509846	93512064
h3k4me1.q.05_peak_13822	chr10	111549288	111550980
h3k4me1.q.05_peak_75461	chr4	34225264	34227638
h3k4me1.q.05_peak_95051	chr6	134248906	134249944
h3k4me1.q.05_peak_98332	chr7	75076835	75079236
h3k4me1.q.05_peak_108477	chr9	15731546	15733331
h3k4me1.q.05_peak_7082	chr1	169438798	169440312
h3k4me1.q.05_peak_62329	chr2	90863963	90864754
h3k4me1.q.05_peak_20704	chr11	114684648	114686269
h3k4me1.q.05_peak_15256	chr11	14030539	14032701
h3k4me1.q.05_peak_45452	chr16	77055477	77056866
h3k4me1.q.05_peak_97612	chr7	63169830	63171065
h3k4me1.q.05_peak_75692	chr4	41479378	41480295
h3k4me1.q.05_peak_44198	chr16	46388410	46391239
h3k4me1.q.05_peak_20984	chr11	117865130	117867202
h3k4me1.q.05_peak_83844	chr5	52009716	52011771
h3k4me1.q.05_peak_53369	chr18	60766628	60767606
h3k4me1.q.05_peak_13921	chr10	113592146	113593282
h3k4me1.q.05_peak_55507	chr19	16166624	16169546
h3k4me1.q.05_peak_97873	chr7	67243363	67245286
h3k4me1.q.05_peak_14164	chr10	118823065	118823851
h3k4me1.q.05_peak_6609	chr1	161575027	161577027
h3k4me1.q.05_peak_73403	chr3	144502179	144502545
h3k4me1.q.05_peak_34732	chr14	65244521	65246732
h3k4me1.q.05_peak_4955	chr1	128789357	128790497
h3k4me1.q.05_peak_94772	chr6	125480137	125482273
h3k4me1.q.05_peak_52470	chr18	43375647	43378170
h3k4me1.q.05_peak_64843	chr2	140897596	140899468
h3k4me1.q.05_peak_35252	chr14	75298064	75299467
h3k4me1.q.05_peak_37126	chr14	120506726	120508335
h3k4me1.q.05_peak_81885	chr5	5054173	5056568
h3k4me1.q.05_peak_50903	chr18	9146234	9148995
h3k4me1.q.05_peak_106457	chr8	102724821	102727485
h3k4me1.q.05_peak_94626	chr6	121327298	121330616
h3k4me1.q.05_peak_88119	chr5	134234330	134235599
h3k4me1.q.05_peak_49664	chr17	72503203	72506392
h3k4me1.q.05_peak_112622	chr9	95262882	95265066
h3k4me1.q.05_peak_91435	chr6	54034412	54034864
h3k4me1.q.05_peak_72489	chr3	127486702	127488628
h3k4me1.q.05_peak_83906	chr5	53206082	53207429
h3k4me1.q.05_peak_24236	chr12	72729138	72729867
h3k4me1.q.05_peak_40879	chr15	85540080	85540289
h3k4me1.q.05_peak_115558	chrX	84569331	84571566
h3k4me1.q.05_peak_92173	chr6	75541370	75543536
h3k4me1.q.05_peak_1978	chr1	57223703	57225907
h3k4me1.q.05_peak_76091	chr4	48723185	48724304
h3k4me1.q.05_peak_81141	chr4	148460096	148461632
h3k4me1.q.05_peak_76990	chr4	70518998	70523884
h3k4me1.q.05_peak_27276	chr13	20403608	20406240
h3k4me1.q.05_peak_10128	chr10	39500823	39508061
h3k4me1.q.05_peak_6905	chr1	167118190	167121146
h3k4me1.q.05_peak_105676	chr8	87783885	87787618
h3k4me1.q.05_peak_92141	chr6	73645247	73645647
h3k4me1.q.05_peak_82065	chr5	12497626	12499742
h3k4me1.q.05_peak_101184	chr7	132407505	132408676
h3k4me1.q.05_peak_93817	chr6	104988438	104992518
h3k4me1.q.05_peak_58250	chr2	8498697	8499863
h3k4me1.q.05_peak_39227	chr15	55157551	55158395
h3k4me1.q.05_peak_88358	chr5	138969577	138970721
h3k4me1.q.05_peak_792	chr1	28045431	28048241
h3k4me1.q.05_peak_110770	chr9	58040671	58050296
h3k4me1.q.05_peak_78750	chr4	105334035	105336597
h3k4me1.q.05_peak_14835	chr11	3382678	3383072
h3k4me1.q.05_peak_68463	chr3	36262641	36264968
h3k4me1.q.05_peak_95848	chr6	148421362	148422646
h3k4me1.q.05_peak_107407	chr8	119835431	119835955
h3k4me1.q.05_peak_76835	chr4	65838117	65840630
h3k4me1.q.05_peak_87050	chr5	118106227	118110481
h3k4me1.q.05_peak_60264	chr2	49609414	49610435
h3k4me1.q.05_peak_62820	chr2	101924685	101926798
h3k4me1.q.05_peak_60274	chr2	49645134	49646084
h3k4me1.q.05_peak_91384	chr6	53545122	53546753
h3k4me1.q.05_peak_102624	chr8	17585666	17586003
h3k4me1.q.05_peak_76323	chr4	54757258	54759571
h3k4me1.q.05_peak_5082	chr1	131491748	131493101
h3k4me1.q.05_peak_109236	chr9	31326078	31327369
h3k4me1.q.05_peak_74691	chr4	14105580	14107667
h3k4me1.q.05_peak_22771	chr12	36680867	36681759
h3k4me1.q.05_peak_52147	chr18	37800106	37801570
h3k4me1.q.05_peak_36142	chr14	97395333	97397696
h3k4me1.q.05_peak_10673	chr10	50841437	50845804
h3k4me1.q.05_peak_76592	chr4	59421408	59423653
h3k4me1.q.05_peak_116144	chrX	130819105	130821221
h3k4me1.q.05_peak_108476	chr9	15720201	15722391
h3k4me1.q.05_peak_46535	chr17	3335290	3340607
h3k4me1.q.05_peak_89876	chr6	22428298	22430184
h3k4me1.q.05_peak_88185	chr5	135460179	135461265
h3k4me1.q.05_peak_109456	chr9	35464557	35467918
h3k4me1.q.05_peak_83423	chr5	42456305	42457623
h3k4me1.q.05_peak_113643	chr9	113462188	113463559
h3k4me1.q.05_peak_44103	chr16	44643268	44645035
h3k4me1.q.05_peak_28948	chr13	51916338	51923215
h3k4me1.q.05_peak_9792	chr10	29538776	29540553
h3k4me1.q.05_peak_64617	chr2	136000651	136001855
h3k4me1.q.05_peak_16082	chr11	32732857	32734388
h3k4me1.q.05_peak_33456	chr14	32905607	32909609
h3k4me1.q.05_peak_98692	chr7	80888729	80890003
h3k4me1.q.05_peak_52413	chr18	42819817	42825824
h3k4me1.q.05_peak_103201	chr8	31821491	31822527
h3k4me1.q.05_peak_29143	chr13	54402027	54404994
h3k4me1.q.05_peak_11836	chr10	75116199	75119086
h3k4me1.q.05_peak_78518	chr4	102485615	102488029
h3k4me1.q.05_peak_73448	chr3	145498530	145499566
h3k4me1.q.05_peak_33591	chr14	35429667	35431250
h3k4me1.q.05_peak_91087	chr6	49206207	49207887
h3k4me1.q.05_peak_57943	chr2	4306351	4307904
h3k4me1.q.05_peak_35900	chr14	88570027	88570862
h3k4me1.q.05_peak_14986	chr11	5848367	5850074
h3k4me1.q.05_peak_72993	chr3	137479608	137480419
h3k4me1.q.05_peak_62586	chr2	93775900	93776966
h3k4me1.q.05_peak_69276	chr3	54957776	54960895
h3k4me1.q.05_peak_58805	chr2	21277515	21284334
h3k4me1.q.05_peak_99644	chr7	100488167	100489293
h3k4me1.q.05_peak_25617	chr12	99297864	99301040
h3k4me1.q.05_peak_35832	chr14	86926351	86928058
h3k4me1.q.05_peak_93323	chr6	98116251	98120034
h3k4me1.q.05_peak_105101	chr8	75134182	75136022
h3k4me1.q.05_peak_49928	chr17	78964287	78965021
h3k4me1.q.05_peak_77311	chr4	81321961	81322664
h3k4me1.q.05_peak_22477	chr12	31700852	31701950
h3k4me1.q.05_peak_54398	chr18	78487263	78496869
h3k4me1.q.05_peak_20129	chr11	107331183	107331552
h3k4me1.q.05_peak_7771	chr1	181989496	181990027
h3k4me1.q.05_peak_28139	chr13	37513748	37516073
h3k4me1.q.05_peak_22157	chr12	26487854	26489080
h3k4me1.q.05_peak_28303	chr13	41758554	41761282
h3k4me1.q.05_peak_15109	chr11	8679768	8682648
h3k4me1.q.05_peak_77732	chr4	87140580	87143069
h3k4me1.q.05_peak_105686	chr8	87859056	87862169
h3k4me1.q.05_peak_99281	chr7	96286094	96287547
h3k4me1.q.05_peak_5313	chr1	134103763	134104274
h3k4me1.q.05_peak_92598	chr6	86245375	86252093
h3k4me1.q.05_peak_72899	chr3	135728772	135731685
h3k4me1.q.05_peak_101318	chr7	134180890	134181723
h3k4me1.q.05_peak_41681	chr15	99040530	99042540
h3k4me1.q.05_peak_45509	chr16	77610301	77610543
h3k4me1.q.05_peak_92214	chr6	77184292	77186697
h3k4me1.q.05_peak_110662	chr9	56654453	56659160
h3k4me1.q.05_peak_44010	chr16	43307039	43311597
h3k4me1.q.05_peak_104038	chr8	48151616	48154554
h3k4me1.q.05_peak_113228	chr9	105363047	105364343
h3k4me1.q.05_peak_7932	chr1	184935322	184936169
h3k4me1.q.05_peak_4988	chr1	129634535	129636358
h3k4me1.q.05_peak_102059	chr8	7439096	7441743
h3k4me1.q.05_peak_67816	chr3	21644424	21645372
h3k4me1.q.05_peak_56020	chr19	26730189	26735495
h3k4me1.q.05_peak_99641	chr7	100402080	100403617
h3k4me1.q.05_peak_3565	chr1	86447577	86448473
h3k4me1.q.05_peak_97679	chr7	64295390	64297649
h3k4me1.q.05_peak_79953	chr4	129124041	129126389
h3k4me1.q.05_peak_99981	chr7	110739631	110741178
h3k4me1.q.05_peak_76353	chr4	55040245	55042566
h3k4me1.q.05_peak_92387	chr6	82419341	82421322
h3k4me1.q.05_peak_59278	chr2	30652003	30653796
h3k4me1.q.05_peak_55704	chr19	20977562	20978885
h3k4me1.q.05_peak_3848	chr1	91206190	91207299
h3k4me1.q.05_peak_60622	chr2	55468702	55470085
h3k4me1.q.05_peak_109029	chr9	28335910	28338383
h3k4me1.q.05_peak_41308	chr15	93009906	93012729
h3k4me1.q.05_peak_63251	chr2	109389174	109390477
h3k4me1.q.05_peak_77789	chr4	87844163	87846136
h3k4me1.q.05_peak_69289	chr3	55074283	55076947
h3k4me1.q.05_peak_67235	chr2	181758669	181760396
h3k4me1.q.05_peak_78433	chr4	100821119	100821481
h3k4me1.q.05_peak_78793	chr4	106232218	106233145
h3k4me1.q.05_peak_40394	chr15	78762334	78763113
h3k4me1.q.05_peak_54204	chr18	75461646	75465945
h3k4me1.q.05_peak_52033	chr18	35358579	35361599
h3k4me1.q.05_peak_22164	chr12	26556219	26558499
h3k4me1.q.05_peak_110761	chr9	57948789	57951708
h3k4me1.q.05_peak_18372	chr11	77847393	77849550
h3k4me1.q.05_peak_104787	chr8	68081126	68084616
h3k4me1.q.05_peak_109744	chr9	41925343	41926158
h3k4me1.q.05_peak_10808	chr10	53444265	53446010
h3k4me1.q.05_peak_45757	chr16	85117095	85118826
h3k4me1.q.05_peak_66413	chr2	167823482	167824822
h3k4me1.q.05_peak_38357	chr15	32352547	32354568
h3k4me1.q.05_peak_67147	chr2	180444817	180446513
h3k4me1.q.05_peak_96397	chr7	27794319	27795397
h3k4me1.q.05_peak_107337	chr8	118439903	118440658
h3k4me1.q.05_peak_91521	chr6	54872439	54873167
h3k4me1.q.05_peak_90511	chr6	34040496	34043818
h3k4me1.q.05_peak_24702	chr12	81140548	81141826
h3k4me1.q.05_peak_10225	chr10	40919272	40919886
h3k4me1.q.05_peak_75292	chr4	32185932	32189973
h3k4me1.q.05_peak_99392	chr7	96907860	96909041
h3k4me1.q.05_peak_79679	chr4	124978656	124979947
h3k4me1.q.05_peak_101382	chr7	135478446	135480475
h3k4me1.q.05_peak_48042	chr17	32816049	32817132
h3k4me1.q.05_peak_89517	chr6	14409536	14410778
h3k4me1.q.05_peak_107927	chr8	126523035	126523901
h3k4me1.q.05_peak_36950	chr14	117904937	117906966
h3k4me1.q.05_peak_27099	chr13	15644161	15644944
h3k4me1.q.05_peak_95491	chr6	142866014	142868429
h3k4me1.q.05_peak_96670	chr7	34938425	34941428
h3k4me1.q.05_peak_9079	chr10	14215757	14216266
h3k4me1.q.05_peak_7452	chr1	177049551	177057697
h3k4me1.q.05_peak_31247	chr13	101914280	101916206
h3k4me1.q.05_peak_26801	chr13	6156035	6160330
h3k4me1.q.05_peak_25495	chr12	97887995	97890368
h3k4me1.q.05_peak_19281	chr11	93821536	93824296
h3k4me1.q.05_peak_36878	chr14	117139054	117142455
h3k4me1.q.05_peak_53889	chr18	69481173	69483148
h3k4me1.q.05_peak_51892	chr18	33443179	33449732
h3k4me1.q.05_peak_88863	chr5	148289714	148290558
h3k4me1.q.05_peak_25560	chr12	98804144	98804919
h3k4me1.q.05_peak_57401	chr19	54034789	54035612
h3k4me1.q.05_peak_65557	chr2	154815984	154818743
h3k4me1.q.05_peak_25592	chr12	99167545	99168359
h3k4me1.q.05_peak_33037	chr14	24910856	24912639
h3k4me1.q.05_peak_94253	chr6	114329329	114330463
h3k4me1.q.05_peak_36106	chr14	95876063	95878495
h3k4me1.q.05_peak_34652	chr14	64255493	64258090
h3k4me1.q.05_peak_27813	chr13	29822570	29828221
h3k4me1.q.05_peak_52250	chr18	38962272	38963139
h3k4me1.q.05_peak_54421	chr18	78773363	78774789
h3k4me1.q.05_peak_19155	chr11	89977716	89979203
h3k4me1.q.05_peak_36048	chr14	93700789	93702724
h3k4me1.q.05_peak_28639	chr13	46334190	46335540
h3k4me1.q.05_peak_22186	chr12	26876894	26878802
h3k4me1.q.05_peak_59763	chr2	38161029	38163488
h3k4me1.q.05_peak_114594	chrX	17543930	17546183
h3k4me1.q.05_peak_10082	chr10	39208984	39210397
h3k4me1.q.05_peak_64524	chr2	134928142	134932534
h3k4me1.q.05_peak_91069	chr6	49018883	49023703
h3k4me1.q.05_peak_76092	chr4	48724683	48726818
h3k4me1.q.05_peak_76363	chr4	55158281	55159677
h3k4me1.q.05_peak_88788	chr5	146711655	146713609
h3k4me1.q.05_peak_87572	chr5	125657573	125660166
h3k4me1.q.05_peak_43480	chr16	34472950	34475248
h3k4me1.q.05_peak_50803	chr18	5964314	5965940
h3k4me1.q.05_peak_87658	chr5	127415543	127417840
h3k4me1.q.05_peak_41187	chr15	90972039	90974140
h3k4me1.q.05_peak_72215	chr3	121735841	121736917
h3k4me1.q.05_peak_20776	chr11	115733872	115734924
h3k4me1.q.05_peak_8346	chr1	192788839	192790594
h3k4me1.q.05_peak_98165	chr7	72737598	72739689
h3k4me1.q.05_peak_61105	chr2	63571713	63576983
h3k4me1.q.05_peak_4993	chr1	129672002	129674275
h3k4me1.q.05_peak_16510	chr11	38135955	38137787
h3k4me1.q.05_peak_40179	chr15	75549061	75550146
h3k4me1.q.05_peak_45902	chr16	88173182	88176041
h3k4me1.q.05_peak_78072	chr4	95345876	95349654
h3k4me1.q.05_peak_47220	chr17	15246862	15249371
h3k4me1.q.05_peak_26373	chr12	111203866	111204184
h3k4me1.q.05_peak_58954	chr2	26341600	26342427
h3k4me1.q.05_peak_41346	chr15	93580263	93580883
h3k4me1.q.05_peak_84965	chr5	76827037	76830706
h3k4me1.q.05_peak_31068	chr13	98729069	98729836
h3k4me1.q.05_peak_12143	chr10	80417895	80420444
h3k4me1.q.05_peak_115356	chrX	70328281	70331591
h3k4me1.q.05_peak_22494	chr12	31903612	31907449
h3k4me1.q.05_peak_54896	chr19	3343521	3345774
h3k4me1.q.05_peak_108329	chr9	13521845	13526985
h3k4me1.q.05_peak_110150	chr9	47306636	47308603
h3k4me1.q.05_peak_27009	chr13	13480630	13482652
h3k4me1.q.05_peak_43704	chr16	38129780	38133009
h3k4me1.q.05_peak_20545	chr11	113389493	113395044
h3k4me1.q.05_peak_27897	chr13	32017973	32021588
h3k4me1.q.05_peak_83017	chr5	34953847	34957812
h3k4me1.q.05_peak_28383	chr13	43230043	43231508
h3k4me1.q.05_peak_96606	chr7	34268404	34269533
h3k4me1.q.05_peak_64929	chr2	141997313	142000329
h3k4me1.q.05_peak_53853	chr18	69141795	69142918
h3k4me1.q.05_peak_68113	chr3	28599117	28599984
h3k4me1.q.05_peak_66573	chr2	169995519	170000117
h3k4me1.q.05_peak_30152	chr13	78798899	78804169
h3k4me1.q.05_peak_11590	chr10	69742088	69742507
h3k4me1.q.05_peak_1696	chr1	51966323	51970522
h3k4me1.q.05_peak_100702	chr7	123400247	123402090
h3k4me1.q.05_peak_106937	chr8	111760289	111761529
h3k4me1.q.05_peak_254	chr1	13312371	13315414
h3k4me1.q.05_peak_59216	chr2	29642333	29643847
h3k4me1.q.05_peak_25836	chr12	102591562	102592618
h3k4me1.q.05_peak_83986	chr5	54099653	54102784
h3k4me1.q.05_peak_12368	chr10	84059027	84062681
h3k4me1.q.05_peak_40769	chr15	84298581	84306196
h3k4me1.q.05_peak_40729	chr15	83828759	83829452
h3k4me1.q.05_peak_76028	chr4	47570701	47571212
h3k4me1.q.05_peak_508	chr1	20897977	20899926
h3k4me1.q.05_peak_39666	chr15	64092729	64093163
h3k4me1.q.05_peak_63110	chr2	105913478	105914507
h3k4me1.q.05_peak_44445	chr16	52022755	52024334
h3k4me1.q.05_peak_34623	chr14	63919411	63923361
h3k4me1.q.05_peak_25529	chr12	98447048	98447254
h3k4me1.q.05_peak_6935	chr1	167606443	167609021
h3k4me1.q.05_peak_44037	chr16	43545660	43550751
h3k4me1.q.05_peak_63561	chr2	116017630	116024687
h3k4me1.q.05_peak_109079	chr9	29103490	29105159
h3k4me1.q.05_peak_104246	chr8	53391050	53392394
h3k4me1.q.05_peak_13005	chr10	95116217	95119827
h3k4me1.q.05_peak_116161	chrX	131787081	131788773
h3k4me1.q.05_peak_60017	chr2	44104286	44105600
h3k4me1.q.05_peak_70773	chr3	89330042	89333882
h3k4me1.q.05_peak_6951	chr1	167760907	167762995
h3k4me1.q.05_peak_73561	chr3	147079618	147086850
h3k4me1.q.05_peak_48745	chr17	51093226	51094276
h3k4me1.q.05_peak_25053	chr12	86772710	86773301
h3k4me1.q.05_peak_59486	chr2	33343495	33347632
h3k4me1.q.05_peak_43896	chr16	41632863	41635215
h3k4me1.q.05_peak_91246	chr6	51693784	51697103
h3k4me1.q.05_peak_1098	chr1	36635535	36637548
h3k4me1.q.05_peak_38596	chr15	37726650	37726962
h3k4me1.q.05_peak_98565	chr7	79193262	79196452
h3k4me1.q.05_peak_111353	chr9	65561128	65562437
h3k4me1.q.05_peak_98678	chr7	80651976	80658447
h3k4me1.q.05_peak_4778	chr1	126453893	126455924
h3k4me1.q.05_peak_74327	chr4	7172591	7172898
h3k4me1.q.05_peak_2577	chr1	67365462	67367658
h3k4me1.q.05_peak_19299	chr11	94069857	94070838
h3k4me1.q.05_peak_110148	chr9	47286665	47287467
h3k4me1.q.05_peak_51810	chr18	31226070	31229106
h3k4me1.q.05_peak_19783	chr11	101394853	101395270
h3k4me1.q.05_peak_97821	chr7	66117862	66122191
h3k4me1.q.05_peak_108789	chr9	23452742	23454461
h3k4me1.q.05_peak_42574	chr16	18193910	18195668
h3k4me1.q.05_peak_60253	chr2	49496868	49497222
h3k4me1.q.05_peak_33111	chr14	25519055	25522807
h3k4me1.q.05_peak_19066	chr11	88594594	88595150
h3k4me1.q.05_peak_92103	chr6	72727451	72732634
h3k4me1.q.05_peak_51033	chr18	12673820	12676080
h3k4me1.q.05_peak_54815	chr18	86722402	86725602
h3k4me1.q.05_peak_18084	chr11	72103239	72105061
h3k4me1.q.05_peak_81038	chr4	142947464	142948097
h3k4me1.q.05_peak_72064	chr3	119318925	119320238
h3k4me1.q.05_peak_98418	chr7	76439962	76440455
h3k4me1.q.05_peak_29650	chr13	63778576	63780578
h3k4me1.q.05_peak_65416	chr2	152716211	152717127
h3k4me1.q.05_peak_84001	chr5	54330358	54331057
h3k4me1.q.05_peak_25245	chr12	91203352	91206806
h3k4me1.q.05_peak_46922	chr17	9873526	9875436
h3k4me1.q.05_peak_58968	chr2	26506504	26509302
h3k4me1.q.05_peak_42088	chr16	5571582	5574932
h3k4me1.q.05_peak_110869	chr9	59201928	59202391
h3k4me1.q.05_peak_85187	chr5	83958569	83960280
h3k4me1.q.05_peak_13338	chr10	101188432	101190313
h3k4me1.q.05_peak_24618	chr12	80013444	80015495
h3k4me1.q.05_peak_106093	chr8	93905998	93909685
h3k4me1.q.05_peak_11483	chr10	68083638	68085230
h3k4me1.q.05_peak_88575	chr5	141885658	141887117
h3k4me1.q.05_peak_104799	chr8	68361603	68363457
h3k4me1.q.05_peak_69379	chr3	56436458	56439631
h3k4me1.q.05_peak_103294	chr8	33115229	33116437
h3k4me1.q.05_peak_99290	chr7	96351150	96353540
h3k4me1.q.05_peak_84607	chr5	71009458	71013800
h3k4me1.q.05_peak_97062	chr7	45272410	45273616
h3k4me1.q.05_peak_1276	chr1	39566917	39569311
h3k4me1.q.05_peak_47956	chr17	31540608	31542327
h3k4me1.q.05_peak_73144	chr3	139795335	139797441
h3k4me1.q.05_peak_35879	chr14	87865030	87866854
h3k4me1.q.05_peak_42105	chr16	6042398	6042795
h3k4me1.q.05_peak_50464	chr17	87360758	87361903
h3k4me1.q.05_peak_59270	chr2	30613336	30615171
h3k4me1.q.05_peak_4454	chr1	115658440	115659298
h3k4me1.q.05_peak_104418	chr8	57753677	57755523
h3k4me1.q.05_peak_4544	chr1	119254047	119257562
h3k4me1.q.05_peak_85929	chr5	100196065	100201767
h3k4me1.q.05_peak_17839	chr11	68243996	68245266
h3k4me1.q.05_peak_72245	chr3	122198570	122202908
h3k4me1.q.05_peak_6495	chr1	159577616	159582672
h3k4me1.q.05_peak_58229	chr2	7640852	7641535
h3k4me1.q.05_peak_106857	chr8	110177038	110178756
h3k4me1.q.05_peak_99791	chr7	102388771	102390492
h3k4me1.q.05_peak_83072	chr5	35878476	35880544
h3k4me1.q.05_peak_108549	chr9	16474881	16476555
h3k4me1.q.05_peak_46087	chr16	91084408	91087169
h3k4me1.q.05_peak_45832	chr16	86684256	86684771
h3k4me1.q.05_peak_79384	chr4	119467669	119468357
h3k4me1.q.05_peak_106160	chr8	94944234	94945958
h3k4me1.q.05_peak_93669	chr6	101668532	101672630
h3k4me1.q.05_peak_24473	chr12	77798285	77800361
h3k4me1.q.05_peak_78429	chr4	100792722	100802520
h3k4me1.q.05_peak_75463	chr4	34240022	34242240
h3k4me1.q.05_peak_9063	chr10	14081105	14083452
h3k4me1.q.05_peak_50374	chr17	86234296	86235511
h3k4me1.q.05_peak_99391	chr7	96902273	96905739
h3k4me1.q.05_peak_3088	chr1	76716707	76719391
h3k4me1.q.05_peak_24203	chr12	72238281	72240778
h3k4me1.q.05_peak_107835	chr8	125384719	125387716
h3k4me1.q.05_peak_65104	chr2	145831970	145833711
h3k4me1.q.05_peak_26921	chr13	9785749	9787458
h3k4me1.q.05_peak_7230	chr1	172071244	172072585
h3k4me1.q.05_peak_24657	chr12	80566015	80568333
h3k4me1.q.05_peak_4109	chr1	97943478	97945027
h3k4me1.q.05_peak_50211	chr17	83937029	83940523
h3k4me1.q.05_peak_14258	chr10	120038394	120039521
h3k4me1.q.05_peak_93516	chr6	100142824	100150218
h3k4me1.q.05_peak_8472	chr1	194389739	194390972
h3k4me1.q.05_peak_21071	chr11	118757069	118757982
h3k4me1.q.05_peak_77187	chr4	76672534	76674641
h3k4me1.q.05_peak_107538	chr8	121296272	121297548
h3k4me1.q.05_peak_79808	chr4	126637027	126639946
h3k4me1.q.05_peak_72922	chr3	136294980	136295732
h3k4me1.q.05_peak_23816	chr12	60978754	60980073
h3k4me1.q.05_peak_114177	chr9	122634661	122636485
h3k4me1.q.05_peak_106136	chr8	94560743	94562110
h3k4me1.q.05_peak_77802	chr4	87933352	87934751
h3k4me1.q.05_peak_54048	chr18	72722793	72727612
h3k4me1.q.05_peak_18378	chr11	77874463	77877632
h3k4me1.q.05_peak_5270	chr1	133583681	133584290
h3k4me1.q.05_peak_72536	chr3	127866832	127870204
h3k4me1.q.05_peak_72475	chr3	127363309	127364365
h3k4me1.q.05_peak_85388	chr5	89709152	89712514
h3k4me1.q.05_peak_81615	chr4	154312670	154313979
h3k4me1.q.05_peak_20517	chr11	113212119	113213404
h3k4me1.q.05_peak_8987	chr10	13150281	13151851
h3k4me1.q.05_peak_45851	chr16	87317956	87320960
h3k4me1.q.05_peak_77783	chr4	87801679	87803372
h3k4me1.q.05_peak_107209	chr8	116052884	116055314
h3k4me1.q.05_peak_28378	chr13	43111848	43113325
h3k4me1.q.05_peak_36691	chr14	109667121	109669555
h3k4me1.q.05_peak_117033	chrY	90798593	90801344
h3k4me1.q.05_peak_22574	chr12	33061014	33062343
h3k4me1.q.05_peak_79822	chr4	126802085	126804628
h3k4me1.q.05_peak_3957	chr1	93063544	93064753
h3k4me1.q.05_peak_85791	chr5	98984389	98988676
h3k4me1.q.05_peak_50011	chr17	80646858	80647195
h3k4me1.q.05_peak_1231	chr1	38729670	38731254
h3k4me1.q.05_peak_46340	chr16	94471474	94474016
h3k4me1.q.05_peak_84890	chr5	75605432	75608713
h3k4me1.q.05_peak_36122	chr14	96608683	96610699
h3k4me1.q.05_peak_70162	chr3	79225174	79226758
h3k4me1.q.05_peak_25470	chr12	97359525	97363918
h3k4me1.q.05_peak_87463	chr5	124269324	124270715
h3k4me1.q.05_peak_48744	chr17	51048181	51049201
h3k4me1.q.05_peak_56820	chr19	43882784	43883745
h3k4me1.q.05_peak_20952	chr11	117592114	117593339
h3k4me1.q.05_peak_46760	chr17	6740921	6743173
h3k4me1.q.05_peak_106922	chr8	111571703	111573520
h3k4me1.q.05_peak_71200	chr3	101095443	101098496
h3k4me1.q.05_peak_66276	chr2	166270790	166272260
h3k4me1.q.05_peak_24077	chr12	70718578	70719570
h3k4me1.q.05_peak_72597	chr3	129391081	129393503
h3k4me1.q.05_peak_44232	chr16	47265394	47268898
h3k4me1.q.05_peak_60343	chr2	50173427	50175147
h3k4me1.q.05_peak_43791	chr16	39530295	39533222
h3k4me1.q.05_peak_53636	chr18	65124017	65125023
h3k4me1.q.05_peak_64833	chr2	140702961	140706406
h3k4me1.q.05_peak_93904	chr6	107556615	107558509
h3k4me1.q.05_peak_7991	chr1	186041871	186046637
h3k4me1.q.05_peak_1365	chr1	41426505	41432520
h3k4me1.q.05_peak_111611	chr9	70269011	70269940
h3k4me1.q.05_peak_105591	chr8	86087028	86088304
h3k4me1.q.05_peak_86011	chr5	101959277	101959882
h3k4me1.q.05_peak_101099	chr7	131336460	131338020
h3k4me1.q.05_peak_27802	chr13	29752793	29754525
h3k4me1.q.05_peak_4932	chr1	128577154	128579760
h3k4me1.q.05_peak_78982	chr4	109172411	109174723
h3k4me1.q.05_peak_68429	chr3	35330201	35336907
h3k4me1.q.05_peak_68715	chr3	40672267	40677456
h3k4me1.q.05_peak_98329	chr7	75018462	75019265
h3k4me1.q.05_peak_21516	chr12	6637016	6640157
h3k4me1.q.05_peak_59217	chr2	29646426	29648443
h3k4me1.q.05_peak_108960	chr9	27331248	27332013
h3k4me1.q.05_peak_53119	chr18	56047091	56050574
h3k4me1.q.05_peak_75962	chr4	46624250	46625744
h3k4me1.q.05_peak_43640	chr16	37477435	37479357
h3k4me1.q.05_peak_97162	chr7	46591824	46592171
h3k4me1.q.05_peak_82338	chr5	19778209	19781078
h3k4me1.q.05_peak_97610	chr7	63164465	63165189
h3k4me1.q.05_peak_91598	chr6	55900420	55902530
h3k4me1.q.05_peak_60852	chr2	59626484	59629494
h3k4me1.q.05_peak_25847	chr12	102637452	102638122
h3k4me1.q.05_peak_78452	chr4	100967031	100968674
h3k4me1.q.05_peak_44367	chr16	50584866	50587664
h3k4me1.q.05_peak_84990	chr5	77121110	77125591
h3k4me1.q.05_peak_92307	chr6	79333687	79336365
h3k4me1.q.05_peak_105659	chr8	87679084	87681560
h3k4me1.q.05_peak_51180	chr18	15173479	15176600
h3k4me1.q.05_peak_51868	chr18	33062178	33066325
h3k4me1.q.05_peak_105662	chr8	87684892	87692782
h3k4me1.q.05_peak_76967	chr4	70289101	70289587
h3k4me1.q.05_peak_74311	chr4	6912512	6915100
h3k4me1.q.05_peak_3234	chr1	78704973	78705717
h3k4me1.q.05_peak_100231	chr7	114892284	114893224
h3k4me1.q.05_peak_27799	chr13	29735410	29739400
h3k4me1.q.05_peak_27959	chr13	34246913	34251097
h3k4me1.q.05_peak_75007	chr4	24568204	24568788
h3k4me1.q.05_peak_33651	chr14	38130448	38131729
h3k4me1.q.05_peak_22581	chr12	33105396	33107569
h3k4me1.q.05_peak_27518	chr13	24628688	24630249
h3k4me1.q.05_peak_30921	chr13	96643586	96645338
h3k4me1.q.05_peak_95083	chr6	134714937	134715508
h3k4me1.q.05_peak_81325	chr4	150338814	150340121
h3k4me1.q.05_peak_49425	chr17	67773144	67774047
h3k4me1.q.05_peak_62870	chr2	102222800	102225179
h3k4me1.q.05_peak_90717	chr6	38802959	38803557
h3k4me1.q.05_peak_88145	chr5	134623130	134623430
h3k4me1.q.05_peak_2065	chr1	58739120	58740657
h3k4me1.q.05_peak_75761	chr4	43342031	43343362
h3k4me1.q.05_peak_57921	chr2	4098316	4102156
h3k4me1.q.05_peak_33683	chr14	39351502	39352371
h3k4me1.q.05_peak_1110	chr1	36890875	36891902
h3k4me1.q.05_peak_93149	chr6	94750118	94751198
h3k4me1.q.05_peak_54857	chr18	88876431	88877492
h3k4me1.q.05_peak_70007	chr3	72789720	72792044
h3k4me1.q.05_peak_95045	chr6	134200959	134201329
h3k4me1.q.05_peak_1310	chr1	39928302	39933487
h3k4me1.q.05_peak_89341	chr6	8275068	8275323
h3k4me1.q.05_peak_113707	chr9	114853128	114855597
h3k4me1.q.05_peak_11876	chr10	75660480	75663512
h3k4me1.q.05_peak_85563	chr5	92863812	92866291
h3k4me1.q.05_peak_78656	chr4	104414976	104416532
h3k4me1.q.05_peak_37556	chr15	10688556	10697954
h3k4me1.q.05_peak_9880	chr10	31812119	31813819
h3k4me1.q.05_peak_94583	chr6	120693503	120694812
h3k4me1.q.05_peak_67711	chr3	18905535	18906852
h3k4me1.q.05_peak_23109	chr12	44496876	44503852
h3k4me1.q.05_peak_82675	chr5	25609545	25610778
h3k4me1.q.05_peak_44402	chr16	51001964	51003433
h3k4me1.q.05_peak_61906	chr2	76531480	76533708
h3k4me1.q.05_peak_17630	chr11	63988794	63990563
h3k4me1.q.05_peak_101320	chr7	134187682	134191048
h3k4me1.q.05_peak_869	chr1	32396892	32398581
h3k4me1.q.05_peak_20942	chr11	117515459	117516933
h3k4me1.q.05_peak_57963	chr2	4454272	4456308
h3k4me1.q.05_peak_94131	chr6	112886282	112886842
h3k4me1.q.05_peak_87862	chr5	131679620	131681801
h3k4me1.q.05_peak_5670	chr1	139290633	139293162
h3k4me1.q.05_peak_67302	chr3	5753004	5758135
h3k4me1.q.05_peak_78222	chr4	97661189	97663793
h3k4me1.q.05_peak_32871	chr14	21842239	21843233
h3k4me1.q.05_peak_44306	chr16	49720270	49724340
h3k4me1.q.05_peak_104669	chr8	64582279	64584039
h3k4me1.q.05_peak_94796	chr6	126339816	126341344
h3k4me1.q.05_peak_10551	chr10	46056761	46059004
h3k4me1.q.05_peak_42926	chr16	25052805	25054857
h3k4me1.q.05_peak_69393	chr3	56697443	56699343
h3k4me1.q.05_peak_20664	chr11	114269831	114271474
h3k4me1.q.05_peak_29681	chr13	64358221	64358969
h3k4me1.q.05_peak_105211	chr8	78339981	78342959
h3k4me1.q.05_peak_78928	chr4	107983661	107986017
h3k4me1.q.05_peak_46688	chr17	5204606	5208145
h3k4me1.q.05_peak_4962	chr1	128859091	128860914
h3k4me1.q.05_peak_46163	chr16	91786282	91787062
h3k4me1.q.05_peak_85219	chr5	84325744	84327514
h3k4me1.q.05_peak_20097	chr11	106817338	106820697
h3k4me1.q.05_peak_13346	chr10	101349823	101350712
h3k4me1.q.05_peak_91433	chr6	53971056	53974648
h3k4me1.q.05_peak_102250	chr8	10627664	10630878
h3k4me1.q.05_peak_36601	chr14	105718360	105722511
h3k4me1.q.05_peak_94469	chr6	118754878	118755087
h3k4me1.q.05_peak_74258	chr4	5804450	5808498
h3k4me1.q.05_peak_76383	chr4	55463853	55464901
h3k4me1.q.05_peak_24655	chr12	80562078	80563412
h3k4me1.q.05_peak_25265	chr12	91414460	91418436
h3k4me1.q.05_peak_72866	chr3	135154993	135156487
h3k4me1.q.05_peak_16746	chr11	44401302	44403280
h3k4me1.q.05_peak_46948	chr17	10229900	10230157
h3k4me1.q.05_peak_7048	chr1	169051137	169052772
h3k4me1.q.05_peak_19962	chr11	103688685	103689240
h3k4me1.q.05_peak_31673	chr13	109580579	109582101
h3k4me1.q.05_peak_61883	chr2	76093596	76095484
h3k4me1.q.05_peak_74385	chr4	8705733	8707229
h3k4me1.q.05_peak_71478	chr3	105566378	105572753
h3k4me1.q.05_peak_53624	chr18	65042455	65044222
h3k4me1.q.05_peak_41753	chr15	99854907	99855646
h3k4me1.q.05_peak_1081	chr1	36522473	36525294
h3k4me1.q.05_peak_31366	chr13	104023336	104026018
h3k4me1.q.05_peak_107396	chr8	119784105	119787278
h3k4me1.q.05_peak_47634	chr17	27639267	27639605
h3k4me1.q.05_peak_87577	chr5	125691942	125693653
h3k4me1.q.05_peak_89190	chr6	5407513	5411120
h3k4me1.q.05_peak_18806	chr11	84939259	84940404
h3k4me1.q.05_peak_93195	chr6	95617821	95619358
h3k4me1.q.05_peak_63013	chr2	104351340	104352894
h3k4me1.q.05_peak_87806	chr5	131082049	131084229
h3k4me1.q.05_peak_7300	chr1	173327499	173330222
h3k4me1.q.05_peak_78450	chr4	100943674	100946593
h3k4me1.q.05_peak_10688	chr10	51174719	51177861
h3k4me1.q.05_peak_107837	chr8	125393902	125396293
h3k4me1.q.05_peak_38536	chr15	36941614	36945836
h3k4me1.q.05_peak_4782	chr1	126475731	126476694
h3k4me1.q.05_peak_71523	chr3	106250231	106252405
h3k4me1.q.05_peak_69714	chr3	65827337	65831409
h3k4me1.q.05_peak_53204	chr18	57284765	57285111
h3k4me1.q.05_peak_22399	chr12	29815712	29817631
h3k4me1.q.05_peak_2382	chr1	63898835	63900839
h3k4me1.q.05_peak_15082	chr11	8494940	8497412
h3k4me1.q.05_peak_71953	chr3	116891770	116892686
h3k4me1.q.05_peak_84644	chr5	71985881	71988551
h3k4me1.q.05_peak_37623	chr15	12227759	12228432
h3k4me1.q.05_peak_107735	chr8	124256085	124258874
h3k4me1.q.05_peak_82646	chr5	24985473	24986601
h3k4me1.q.05_peak_86545	chr5	111769849	111774484
h3k4me1.q.05_peak_78294	chr4	98115100	98115424
h3k4me1.q.05_peak_14981	chr11	5775247	5776473
h3k4me1.q.05_peak_27461	chr13	23946216	23946868
h3k4me1.q.05_peak_85560	chr5	92855820	92858726
h3k4me1.q.05_peak_97830	chr7	66230196	66231745
h3k4me1.q.05_peak_102709	chr8	22263100	22265533
h3k4me1.q.05_peak_10747	chr10	52717464	52720031
h3k4me1.q.05_peak_68041	chr3	27676709	27679077
h3k4me1.q.05_peak_104572	chr8	61384959	61391415
h3k4me1.q.05_peak_39165	chr15	53315341	53319223
h3k4me1.q.05_peak_45895	chr16	88060451	88061773
h3k4me1.q.05_peak_104463	chr8	58677289	58679182
h3k4me1.q.05_peak_45308	chr16	74092489	74094260
h3k4me1.q.05_peak_52395	chr18	42730496	42735091
h3k4me1.q.05_peak_88216	chr5	136015602	136017764
h3k4me1.q.05_peak_53500	chr18	62884952	62886874
h3k4me1.q.05_peak_63005	chr2	104250449	104253349
h3k4me1.q.05_peak_50284	chr17	84814811	84817005
h3k4me1.q.05_peak_108218	chr9	9581968	9585045
h3k4me1.q.05_peak_46538	chr17	3349417	3350684
h3k4me1.q.05_peak_54244	chr18	75891886	75893117
h3k4me1.q.05_peak_109771	chr9	42205917	42208368
h3k4me1.q.05_peak_12122	chr10	80270132	80271464
h3k4me1.q.05_peak_70172	chr3	79269848	79272455
h3k4me1.q.05_peak_83968	chr5	53946266	53948803
h3k4me1.q.05_peak_94414	chr6	117218598	117219567
h3k4me1.q.05_peak_73097	chr3	138787900	138793184
h3k4me1.q.05_peak_7437	chr1	176962320	176962683
h3k4me1.q.05_peak_44464	chr16	52145899	52148010
h3k4me1.q.05_peak_80277	chr4	133204356	133205210
h3k4me1.q.05_peak_18370	chr11	77832573	77833105
h3k4me1.q.05_peak_10702	chr10	51617185	51620397
h3k4me1.q.05_peak_112132	chr9	83568455	83569533
h3k4me1.q.05_peak_81938	chr5	6589802	6590619
h3k4me1.q.05_peak_62904	chr2	102598832	102600215
h3k4me1.q.05_peak_25753	chr12	100762429	100763653
h3k4me1.q.05_peak_44801	chr16	63010904	63012367
h3k4me1.q.05_peak_60705	chr2	57521173	57524827
h3k4me1.q.05_peak_20029	chr11	105333713	105334861
h3k4me1.q.05_peak_55347	chr19	12475099	12476421
h3k4me1.q.05_peak_105823	chr8	89872029	89873990
h3k4me1.q.05_peak_26554	chr12	113163065	113164420
h3k4me1.q.05_peak_84249	chr5	64313305	64315272
h3k4me1.q.05_peak_101843	chr7	143804924	143806143
h3k4me1.q.05_peak_101066	chr7	130593265	130594577
h3k4me1.q.05_peak_19316	chr11	94236012	94236511
h3k4me1.q.05_peak_53804	chr18	68194481	68198253
h3k4me1.q.05_peak_85202	chr5	84169817	84170473
h3k4me1.q.05_peak_55091	chr19	6517724	6519678
h3k4me1.q.05_peak_4585	chr1	119883468	119886711
h3k4me1.q.05_peak_110265	chr9	48673142	48679859
h3k4me1.q.05_peak_57910	chr2	3960198	3960917
h3k4me1.q.05_peak_66943	chr2	178326943	178328853
h3k4me1.q.05_peak_12887	chr10	93694850	93696855
h3k4me1.q.05_peak_53402	chr18	60977547	60978471
h3k4me1.q.05_peak_67268	chr3	4854736	4855887
h3k4me1.q.05_peak_19934	chr11	103234563	103235365
h3k4me1.q.05_peak_5340	chr1	134335331	134336339
h3k4me1.q.05_peak_1826	chr1	54790608	54792252
h3k4me1.q.05_peak_112495	chr9	92173861	92175538
h3k4me1.q.05_peak_50294	chr17	85072011	85073458
h3k4me1.q.05_peak_21063	chr11	118727778	118729912
h3k4me1.q.05_peak_99642	chr7	100430940	100431516
h3k4me1.q.05_peak_11411	chr10	67050990	67057435
h3k4me1.q.05_peak_55597	chr19	17818714	17819993
h3k4me1.q.05_peak_98160	chr7	72610664	72611535
h3k4me1.q.05_peak_36912	chr14	117571045	117573181
h3k4me1.q.05_peak_14881	chr11	4260039	4262844
h3k4me1.q.05_peak_10784	chr10	52992084	52992842
h3k4me1.q.05_peak_51515	chr18	24744756	24745642
h3k4me1.q.05_peak_6652	chr1	162312845	162313772
h3k4me1.q.05_peak_111205	chr9	63533733	63536105
h3k4me1.q.05_peak_39462	chr15	59412999	59416945
h3k4me1.q.05_peak_111991	chr9	79430282	79431559
h3k4me1.q.05_peak_98289	chr7	74321989	74326613
h3k4me1.q.05_peak_109337	chr9	34160564	34162528
h3k4me1.q.05_peak_51628	chr18	26227249	26228888
h3k4me1.q.05_peak_78974	chr4	109047222	109047898
h3k4me1.q.05_peak_9949	chr10	34396678	34397830
h3k4me1.q.05_peak_3465	chr1	83630955	83632910
h3k4me1.q.05_peak_109950	chr9	44187964	44189101
h3k4me1.q.05_peak_50083	chr17	81400296	81405615
h3k4me1.q.05_peak_52819	chr18	50550378	50553162
h3k4me1.q.05_peak_21408	chr12	4863413	4864368
h3k4me1.q.05_peak_6037	chr1	152532256	152532932
h3k4me1.q.05_peak_35451	chr14	77624682	77628229
h3k4me1.q.05_peak_7639	chr1	179590956	179592567
h3k4me1.q.05_peak_18392	chr11	77946359	77948805
h3k4me1.q.05_peak_105886	chr8	90654750	90659755
h3k4me1.q.05_peak_38311	chr15	31897681	31900674
h3k4me1.q.05_peak_29513	chr13	59940504	59944702
h3k4me1.q.05_peak_85966	chr5	100852035	100853123
h3k4me1.q.05_peak_98810	chr7	83230526	83231580
h3k4me1.q.05_peak_10995	chr10	58934936	58938803
h3k4me1.q.05_peak_78319	chr4	98580196	98580399
h3k4me1.q.05_peak_46317	chr16	94163783	94165601
h3k4me1.q.05_peak_27776	chr13	29486208	29487549
h3k4me1.q.05_peak_26100	chr12	106938557	106939992
h3k4me1.q.05_peak_23306	chr12	50803421	50805683
h3k4me1.q.05_peak_27580	chr13	25762362	25762726
h3k4me1.q.05_peak_83727	chr5	49460076	49461556
h3k4me1.q.05_peak_64222	chr2	129166388	129167400
h3k4me1.q.05_peak_79393	chr4	119669762	119671216
h3k4me1.q.05_peak_16714	chr11	43565274	43567455
h3k4me1.q.05_peak_36300	chr14	100102999	100105868
h3k4me1.q.05_peak_111809	chr9	75001374	75002451
h3k4me1.q.05_peak_88346	chr5	138778657	138779290
h3k4me1.q.05_peak_19037	chr11	88458528	88461731
h3k4me1.q.05_peak_98812	chr7	83237946	83238921
h3k4me1.q.05_peak_14971	chr11	5528591	5529761
h3k4me1.q.05_peak_31336	chr13	103247715	103249248
h3k4me1.q.05_peak_39464	chr15	59447776	59450012
h3k4me1.q.05_peak_18821	chr11	85621775	85622996
h3k4me1.q.05_peak_11572	chr10	69593721	69595415
h3k4me1.q.05_peak_17723	chr11	66023874	66025597
h3k4me1.q.05_peak_65693	chr2	157319779	157323646
h3k4me1.q.05_peak_36488	chr14	103586037	103590434
h3k4me1.q.05_peak_46801	chr17	7641875	7643269
h3k4me1.q.05_peak_36282	chr14	99866211	99867359
h3k4me1.q.05_peak_8264	chr1	190861385	190862277
h3k4me1.q.05_peak_88664	chr5	143058225	143058425
h3k4me1.q.05_peak_87969	chr5	132331445	132337643
h3k4me1.q.05_peak_47662	chr17	28012794	28013770
h3k4me1.q.05_peak_76985	chr4	70498907	70500276
h3k4me1.q.05_peak_43397	chr16	33583574	33585953
h3k4me1.q.05_peak_4933	chr1	128583194	128588160
h3k4me1.q.05_peak_113179	chr9	104234809	104235018
h3k4me1.q.05_peak_76040	chr4	47693170	47694162
h3k4me1.q.05_peak_6036	chr1	152521984	152522337
h3k4me1.q.05_peak_42992	chr16	26059667	26062013
h3k4me1.q.05_peak_63266	chr2	109742952	109744646
h3k4me1.q.05_peak_74524	chr4	11495044	11496114
h3k4me1.q.05_peak_107317	chr8	118262370	118264563
h3k4me1.q.05_peak_836	chr1	30700319	30701506
h3k4me1.q.05_peak_10786	chr10	52996021	52997844
h3k4me1.q.05_peak_87498	chr5	125014777	125015929
h3k4me1.q.05_peak_65688	chr2	157295385	157295716
h3k4me1.q.05_peak_17463	chr11	60246108	60246891
h3k4me1.q.05_peak_69238	chr3	53890382	53891475
h3k4me1.q.05_peak_77312	chr4	81327674	81328141
h3k4me1.q.05_peak_108786	chr9	23436229	23438087
h3k4me1.q.05_peak_39507	chr15	60088722	60090696
h3k4me1.q.05_peak_32721	chr14	20143926	20144446
h3k4me1.q.05_peak_100453	chr7	117658266	117658710
h3k4me1.q.05_peak_97378	chr7	51788854	51789442
h3k4me1.q.05_peak_69572	chr3	62086916	62088421
h3k4me1.q.05_peak_49646	chr17	72236893	72238454
h3k4me1.q.05_peak_56046	chr19	27064413	27068710
h3k4me1.q.05_peak_90606	chr6	36751777	36760039
h3k4me1.q.05_peak_106912	chr8	111467470	111473153
h3k4me1.q.05_peak_32935	chr14	22678922	22681505
h3k4me1.q.05_peak_57737	chr19	59051191	59055853
h3k4me1.q.05_peak_31032	chr13	98005102	98005296
h3k4me1.q.05_peak_4124	chr1	98053570	98057957
h3k4me1.q.05_peak_96875	chr7	37908684	37911989
h3k4me1.q.05_peak_2005	chr1	57673149	57674587
h3k4me1.q.05_peak_60152	chr2	46241893	46244278
h3k4me1.q.05_peak_33016	chr14	24738510	24739643
h3k4me1.q.05_peak_39279	chr15	56277327	56279364
h3k4me1.q.05_peak_60905	chr2	60143646	60146379
h3k4me1.q.05_peak_41306	chr15	92993388	92995419
h3k4me1.q.05_peak_74005	chr3	154946099	154946479
h3k4me1.q.05_peak_91544	chr6	55388176	55390400
h3k4me1.q.05_peak_114597	chrX	17558250	17559834
h3k4me1.q.05_peak_18309	chr11	76472177	76473543
h3k4me1.q.05_peak_81790	chr5	3394145	3397244
h3k4me1.q.05_peak_62961	chr2	103599084	103601426
h3k4me1.q.05_peak_84785	chr5	74171879	74177294
h3k4me1.q.05_peak_25632	chr12	99375578	99378076
h3k4me1.q.05_peak_91378	chr6	53448711	53453177
h3k4me1.q.05_peak_83481	chr5	44151338	44152175
h3k4me1.q.05_peak_58444	chr2	13329402	13329656
h3k4me1.q.05_peak_24770	chr12	82424525	82424883
h3k4me1.q.05_peak_63493	chr2	115458676	115461828
h3k4me1.q.05_peak_114120	chr9	121666102	121670544
h3k4me1.q.05_peak_105326	chr8	80839997	80840902
h3k4me1.q.05_peak_6256	chr1	155515479	155516669
h3k4me1.q.05_peak_17471	chr11	60285880	60288013
h3k4me1.q.05_peak_52409	chr18	42796575	42797460
h3k4me1.q.05_peak_38211	chr15	30569658	30570479
h3k4me1.q.05_peak_47121	chr17	12790095	12792852
h3k4me1.q.05_peak_97866	chr7	67087311	67088979
h3k4me1.q.05_peak_12383	chr10	84409410	84417580
h3k4me1.q.05_peak_34413	chr14	60681317	60684934
h3k4me1.q.05_peak_33090	chr14	25365254	25366396
h3k4me1.q.05_peak_102745	chr8	22882358	22882723
h3k4me1.q.05_peak_7514	chr1	177682930	177685290
h3k4me1.q.05_peak_98219	chr7	73411027	73413227
h3k4me1.q.05_peak_40310	chr15	77265936	77268460
h3k4me1.q.05_peak_25319	chr12	92108625	92110349
h3k4me1.q.05_peak_89100	chr6	4166977	4168319
h3k4me1.q.05_peak_44347	chr16	50210837	50212119
h3k4me1.q.05_peak_8257	chr1	190721842	190722764
h3k4me1.q.05_peak_19047	chr11	88501035	88503251
h3k4me1.q.05_peak_11602	chr10	69834094	69836582
h3k4me1.q.05_peak_26303	chr12	109745652	109747678
h3k4me1.q.05_peak_15264	chr11	14350024	14351577
h3k4me1.q.05_peak_111126	chr9	62435835	62436460
h3k4me1.q.05_peak_46803	chr17	7722675	7723962
h3k4me1.q.05_peak_10889	chr10	56492388	56493870
h3k4me1.q.05_peak_63457	chr2	114918113	114920298
h3k4me1.q.05_peak_7025	chr1	168472221	168477372
h3k4me1.q.05_peak_6894	chr1	167031612	167033546
h3k4me1.q.05_peak_104562	chr8	61330168	61331348
h3k4me1.q.05_peak_107274	chr8	117401778	117404158
h3k4me1.q.05_peak_1400	chr1	42151682	42153504
h3k4me1.q.05_peak_5539	chr1	137372713	137377627
h3k4me1.q.05_peak_15554	chr11	21104020	21105286
h3k4me1.q.05_peak_98429	chr7	76560043	76562751
h3k4me1.q.05_peak_3324	chr1	81041467	81044229
h3k4me1.q.05_peak_6688	chr1	163128738	163130817
h3k4me1.q.05_peak_111056	chr9	61583042	61584701
h3k4me1.q.05_peak_52675	chr18	47135515	47136959
h3k4me1.q.05_peak_77487	chr4	83205072	83210174
h3k4me1.q.05_peak_37773	chr15	17962942	17965291
h3k4me1.q.05_peak_90472	chr6	33728968	33730136
h3k4me1.q.05_peak_44992	chr16	67019057	67021314
h3k4me1.q.05_peak_11929	chr10	76778461	76779586
h3k4me1.q.05_peak_108323	chr9	13478785	13480949
h3k4me1.q.05_peak_21217	chr11	120216748	120217566
h3k4me1.q.05_peak_63513	chr2	115664703	115665246
h3k4me1.q.05_peak_65440	chr2	153003438	153004806
h3k4me1.q.05_peak_105250	chr8	79104778	79105572
h3k4me1.q.05_peak_61820	chr2	75384944	75386378
h3k4me1.q.05_peak_76621	chr4	59869058	59871055
h3k4me1.q.05_peak_14194	chr10	119054095	119057273
h3k4me1.q.05_peak_6169	chr1	154703380	154705984
h3k4me1.q.05_peak_99618	chr7	99964319	99967516
h3k4me1.q.05_peak_103017	chr8	27874882	27877441
h3k4me1.q.05_peak_62360	chr2	91283932	91286032
h3k4me1.q.05_peak_66036	chr2	162973320	162976894
h3k4me1.q.05_peak_32451	chr14	12383101	12384424
h3k4me1.q.05_peak_17102	chr11	52446713	52448630
h3k4me1.q.05_peak_113655	chr9	113651355	113651730
h3k4me1.q.05_peak_113631	chr9	113247714	113249332
h3k4me1.q.05_peak_10105	chr10	39397401	39398490
h3k4me1.q.05_peak_2336	chr1	63048026	63049270
h3k4me1.q.05_peak_91531	chr6	55082096	55083300
h3k4me1.q.05_peak_17752	chr11	66417635	66419838
h3k4me1.q.05_peak_37245	chr14	122383500	122386692
h3k4me1.q.05_peak_26240	chr12	108667645	108669508
h3k4me1.q.05_peak_17085	chr11	52085710	52087421
h3k4me1.q.05_peak_29807	chr13	70227099	70227798
h3k4me1.q.05_peak_27038	chr13	14487526	14488707
h3k4me1.q.05_peak_87093	chr5	118434657	118438825
h3k4me1.q.05_peak_109711	chr9	41591920	41592290
h3k4me1.q.05_peak_15797	chr11	25736486	25738051
h3k4me1.q.05_peak_80858	chr4	140644294	140644869
h3k4me1.q.05_peak_90962	chr6	46945271	46947461
h3k4me1.q.05_peak_59477	chr2	33253754	33254894
h3k4me1.q.05_peak_113407	chr9	107981951	107983665
h3k4me1.q.05_peak_20055	chr11	105758016	105761846
h3k4me1.q.05_peak_25473	chr12	97398381	97399637
h3k4me1.q.05_peak_97822	chr7	66127235	66129023
h3k4me1.q.05_peak_22270	chr12	28047447	28048449
h3k4me1.q.05_peak_89041	chr5	150891906	150896511
h3k4me1.q.05_peak_28766	chr13	48125673	48127479
h3k4me1.q.05_peak_82836	chr5	30748762	30752072
h3k4me1.q.05_peak_28995	chr13	52679580	52682645
h3k4me1.q.05_peak_15579	chr11	21863746	21866407
h3k4me1.q.05_peak_39005	chr15	50686200	50690659
h3k4me1.q.05_peak_98564	chr7	79189283	79192363
h3k4me1.q.05_peak_85571	chr5	92918129	92919768
h3k4me1.q.05_peak_53835	chr18	68764674	68765913
h3k4me1.q.05_peak_3881	chr1	91932919	91933791
h3k4me1.q.05_peak_88451	chr5	140073376	140074459
h3k4me1.q.05_peak_23948	chr12	68583557	68587512
h3k4me1.q.05_peak_66762	chr2	172337843	172338916
h3k4me1.q.05_peak_56776	chr19	42671985	42675095
h3k4me1.q.05_peak_62536	chr2	93290529	93292578
h3k4me1.q.05_peak_299	chr1	14198862	14199978
h3k4me1.q.05_peak_97957	chr7	68223395	68223923
h3k4me1.q.05_peak_112863	chr9	99325784	99327702
h3k4me1.q.05_peak_111708	chr9	72643726	72645342
h3k4me1.q.05_peak_27716	chr13	28838373	28841338
h3k4me1.q.05_peak_1179	chr1	38333835	38335278
h3k4me1.q.05_peak_55822	chr19	23506871	23508766
h3k4me1.q.05_peak_112937	chr9	100654050	100654825
h3k4me1.q.05_peak_101795	chr7	143059169	143059798
h3k4me1.q.05_peak_30036	chr13	76257718	76259505
h3k4me1.q.05_peak_58400	chr2	12383374	12385127
h3k4me1.q.05_peak_39562	chr15	61537608	61538868
h3k4me1.q.05_peak_35861	chr14	87470727	87472480
h3k4me1.q.05_peak_26417	chr12	111769267	111770111
h3k4me1.q.05_peak_29770	chr13	69760580	69762384
h3k4me1.q.05_peak_14547	chr10	125323889	125324996
h3k4me1.q.05_peak_69042	chr3	51543427	51545961
h3k4me1.q.05_peak_100054	chr7	112232103	112235592
h3k4me1.q.05_peak_28376	chr13	43070827	43072047
h3k4me1.q.05_peak_108931	chr9	27117880	27118534
h3k4me1.q.05_peak_9984	chr10	36728847	36730485
h3k4me1.q.05_peak_112568	chr9	94408031	94411836
h3k4me1.q.05_peak_111820	chr9	75400778	75402515
h3k4me1.q.05_peak_99337	chr7	96592367	96592824
h3k4me1.q.05_peak_72912	chr3	136006641	136009134
h3k4me1.q.05_peak_21601	chr12	8669335	8670682
h3k4me1.q.05_peak_40041	chr15	73161659	73162268
h3k4me1.q.05_peak_16140	chr11	33746618	33748282
h3k4me1.q.05_peak_33631	chr14	37238078	37239785
h3k4me1.q.05_peak_80183	chr4	131821112	131822136
h3k4me1.q.05_peak_90681	chr6	37895631	37896670
h3k4me1.q.05_peak_1496	chr1	43535219	43536328
h3k4me1.q.05_peak_75835	chr4	44917235	44919053
h3k4me1.q.05_peak_8833	chr10	9544202	9546916
h3k4me1.q.05_peak_7446	chr1	177014421	177017128
h3k4me1.q.05_peak_10039	chr10	37664189	37665008
h3k4me1.q.05_peak_33965	chr14	49458111	49459162
h3k4me1.q.05_peak_46034	chr16	90407351	90410533
h3k4me1.q.05_peak_23039	chr12	42136490	42139729
h3k4me1.q.05_peak_40557	chr15	81128629	81130681
h3k4me1.q.05_peak_93692	chr6	102183691	102187639
h3k4me1.q.05_peak_109590	chr9	40381503	40382881
h3k4me1.q.05_peak_58621	chr2	18232440	18234842
h3k4me1.q.05_peak_44107	chr16	44675573	44677865
h3k4me1.q.05_peak_50005	chr17	80471228	80472440
h3k4me1.q.05_peak_40782	chr15	84407752	84409542
h3k4me1.q.05_peak_88642	chr5	142857270	142858695
h3k4me1.q.05_peak_77264	chr4	79530263	79532835
h3k4me1.q.05_peak_38158	chr15	28917388	28920620
h3k4me1.q.05_peak_103399	chr8	34742981	34743806
h3k4me1.q.05_peak_43302	chr16	31702329	31703423
h3k4me1.q.05_peak_73482	chr3	145876510	145877531
h3k4me1.q.05_peak_103077	chr8	28870726	28873051
h3k4me1.q.05_peak_93316	chr6	98046044	98049851
h3k4me1.q.05_peak_93464	chr6	99862308	99865588
h3k4me1.q.05_peak_111150	chr9	62553874	62555626
h3k4me1.q.05_peak_84991	chr5	77136342	77138925
h3k4me1.q.05_peak_62834	chr2	102011217	102013124
h3k4me1.q.05_peak_11705	chr10	71752447	71756328
h3k4me1.q.05_peak_16512	chr11	38168640	38169315
h3k4me1.q.05_peak_35444	chr14	77574209	77574523
h3k4me1.q.05_peak_112032	chr9	80160768	80162195
h3k4me1.q.05_peak_75402	chr4	33413021	33414268
h3k4me1.q.05_peak_95059	chr6	134491814	134496806
h3k4me1.q.05_peak_10980	chr10	58833193	58834427
h3k4me1.q.05_peak_101029	chr7	130204980	130207998
h3k4me1.q.05_peak_25982	chr12	105551141	105552340
h3k4me1.q.05_peak_51255	chr18	16759093	16759470
h3k4me1.q.05_peak_103764	chr8	43879560	43880535
h3k4me1.q.05_peak_61028	chr2	62331232	62333467
h3k4me1.q.05_peak_6322	chr1	156917709	156919147
h3k4me1.q.05_peak_28349	chr13	42820081	42821545
h3k4me1.q.05_peak_85149	chr5	82287533	82289930
h3k4me1.q.05_peak_41341	chr15	93551572	93552600
h3k4me1.q.05_peak_5527	chr1	137200932	137202133
h3k4me1.q.05_peak_20394	chr11	111555320	111556158
h3k4me1.q.05_peak_107487	chr8	120470826	120473081
h3k4me1.q.05_peak_115803	chrX	99546522	99563546
h3k4me1.q.05_peak_53502	chr18	62891762	62892262
h3k4me1.q.05_peak_22858	chr12	38853707	38856774
h3k4me1.q.05_peak_60071	chr2	44803823	44804878
h3k4me1.q.05_peak_39765	chr15	66323276	66326243
h3k4me1.q.05_peak_95286	chr6	138006603	138009915
h3k4me1.q.05_peak_91401	chr6	53622512	53627016
h3k4me1.q.05_peak_69687	chr3	65440699	65444273
h3k4me1.q.05_peak_30195	chr13	80380739	80383231
h3k4me1.q.05_peak_4786	chr1	126541015	126541311
h3k4me1.q.05_peak_98374	chr7	75683443	75684032
h3k4me1.q.05_peak_11981	chr10	77610330	77611061
h3k4me1.q.05_peak_91402	chr6	53627831	53630358
h3k4me1.q.05_peak_18459	chr11	79035711	79037106
h3k4me1.q.05_peak_40263	chr15	76597929	76599002
h3k4me1.q.05_peak_28773	chr13	48170068	48173227
h3k4me1.q.05_peak_87328	chr5	122240649	122241585
h3k4me1.q.05_peak_30345	chr13	83761919	83764355
h3k4me1.q.05_peak_64416	chr2	132462357	132464126
h3k4me1.q.05_peak_76579	chr4	59282239	59283394
h3k4me1.q.05_peak_48375	chr17	45529536	45531149
h3k4me1.q.05_peak_97717	chr7	64687212	64689274
h3k4me1.q.05_peak_53077	chr18	55525514	55529797
h3k4me1.q.05_peak_11300	chr10	63937354	63942545
h3k4me1.q.05_peak_85275	chr5	85593898	85596113
h3k4me1.q.05_peak_13608	chr10	108524058	108525333
h3k4me1.q.05_peak_35378	chr14	76621883	76624217
h3k4me1.q.05_peak_70933	chr3	95002438	95003197
h3k4me1.q.05_peak_21451	chr12	5318910	5320391
h3k4me1.q.05_peak_85080	chr5	80440376	80442052
h3k4me1.q.05_peak_107331	chr8	118378959	118383442
h3k4me1.q.05_peak_98962	chr7	89497934	89501514
h3k4me1.q.05_peak_41012	chr15	87199853	87201758
h3k4me1.q.05_peak_82633	chr5	24834294	24835081
h3k4me1.q.05_peak_81864	chr5	4875741	4880102
h3k4me1.q.05_peak_45470	chr16	77315101	77316628
h3k4me1.q.05_peak_74842	chr4	20508466	20512076
h3k4me1.q.05_peak_106314	chr8	98308777	98311606
h3k4me1.q.05_peak_29420	chr13	58210455	58211044
h3k4me1.q.05_peak_9805	chr10	29823383	29826236
h3k4me1.q.05_peak_13773	chr10	110951971	110953628
h3k4me1.q.05_peak_32808	chr14	21382520	21385085
h3k4me1.q.05_peak_8448	chr1	194030277	194031905
h3k4me1.q.05_peak_44126	chr16	45097148	45099609
h3k4me1.q.05_peak_19042	chr11	88474208	88476616
h3k4me1.q.05_peak_18514	chr11	79908137	79909323
h3k4me1.q.05_peak_110443	chr9	51204387	51205891
h3k4me1.q.05_peak_85578	chr5	92960219	92961679
h3k4me1.q.05_peak_10932	chr10	57571439	57573375
h3k4me1.q.05_peak_76247	chr4	53396522	53399575
h3k4me1.q.05_peak_22194	chr12	26935939	26936238
h3k4me1.q.05_peak_87319	chr5	122085124	122087256
h3k4me1.q.05_peak_78664	chr4	104439264	104442043
h3k4me1.q.05_peak_46633	chr17	4864602	4866880
h3k4me1.q.05_peak_68035	chr3	27645677	27649494
h3k4me1.q.05_peak_73126	chr3	139029872	139032559
h3k4me1.q.05_peak_15470	chr11	20011059	20011994
h3k4me1.q.05_peak_21201	chr11	119987749	119990238
h3k4me1.q.05_peak_56172	chr19	28993962	28995382
h3k4me1.q.05_peak_97925	chr7	67972034	67975403
h3k4me1.q.05_peak_5220	chr1	133079235	133082245
h3k4me1.q.05_peak_12289	chr10	82892842	82895340
h3k4me1.q.05_peak_113551	chr9	111473309	111476530
h3k4me1.q.05_peak_77347	chr4	81924921	81927462
h3k4me1.q.05_peak_39427	chr15	59010234	59013466
h3k4me1.q.05_peak_61322	chr2	67815527	67816241
h3k4me1.q.05_peak_86770	chr5	113937870	113938095
h3k4me1.q.05_peak_19751	chr11	101022410	101024578
h3k4me1.q.05_peak_65488	chr2	153599857	153601833
h3k4me1.q.05_peak_63001	chr2	104175636	104177627
h3k4me1.q.05_peak_22159	chr12	26524289	26526229
h3k4me1.q.05_peak_68994	chr3	51082626	51084613
h3k4me1.q.05_peak_94913	chr6	127900907	127902216
h3k4me1.q.05_peak_102485	chr8	13648003	13650109
h3k4me1.q.05_peak_5338	chr1	134318056	134319669
h3k4me1.q.05_peak_105619	chr8	86732909	86737203
h3k4me1.q.05_peak_71485	chr3	105611406	105612988
h3k4me1.q.05_peak_39767	chr15	66353331	66354438
h3k4me1.q.05_peak_16414	chr11	36599351	36600304
h3k4me1.q.05_peak_16231	chr11	35223568	35225376
h3k4me1.q.05_peak_24402	chr12	76287167	76289110
h3k4me1.q.05_peak_33284	chr14	29441908	29443988
h3k4me1.q.05_peak_91947	chr6	67318218	67318426
h3k4me1.q.05_peak_4779	chr1	126456697	126458083
h3k4me1.q.05_peak_23585	chr12	54409604	54411219
h3k4me1.q.05_peak_114363	chrX	10723899	10725912
h3k4me1.q.05_peak_30582	chr13	90895594	90897237
h3k4me1.q.05_peak_27795	chr13	29628016	29630517
h3k4me1.q.05_peak_3072	chr1	76488465	76492534
h3k4me1.q.05_peak_43961	chr16	42614759	42616502
h3k4me1.q.05_peak_64219	chr2	129139036	129140690
h3k4me1.q.05_peak_53155	chr18	56722201	56724813
h3k4me1.q.05_peak_114398	chrX	11511882	11514320
h3k4me1.q.05_peak_49159	chr17	63715249	63717922
h3k4me1.q.05_peak_3241	chr1	78760509	78762222
h3k4me1.q.05_peak_13171	chr10	97237478	97238734
h3k4me1.q.05_peak_54051	chr18	72797161	72798348
h3k4me1.q.05_peak_89742	chr6	18656423	18658100
h3k4me1.q.05_peak_88099	chr5	133937171	133941642
h3k4me1.q.05_peak_77498	chr4	83265437	83266584
h3k4me1.q.05_peak_33112	chr14	25546570	25552003
h3k4me1.q.05_peak_4929	chr1	128559926	128563036
h3k4me1.q.05_peak_93682	chr6	101936070	101942127
h3k4me1.q.05_peak_9840	chr10	30774977	30776427
h3k4me1.q.05_peak_105279	chr8	79828400	79830459
h3k4me1.q.05_peak_40036	chr15	73139518	73141536
h3k4me1.q.05_peak_66007	chr2	162410641	162414396
h3k4me1.q.05_peak_5644	chr1	138982151	138984491
h3k4me1.q.05_peak_108567	chr9	16930887	16932449
h3k4me1.q.05_peak_109747	chr9	41942225	41944225
h3k4me1.q.05_peak_41086	chr15	88467201	88470662
h3k4me1.q.05_peak_78714	chr4	104768760	104771240
h3k4me1.q.05_peak_98826	chr7	83489688	83489935
h3k4me1.q.05_peak_84605	chr5	70992506	70997799
h3k4me1.q.05_peak_50877	chr18	8717630	8721766
h3k4me1.q.05_peak_74282	chr4	6389497	6391069
h3k4me1.q.05_peak_32865	chr14	21761571	21763097
h3k4me1.q.05_peak_20898	chr11	117127417	117128765
h3k4me1.q.05_peak_58880	chr2	25163121	25164134
h3k4me1.q.05_peak_103363	chr8	34319639	34321525
h3k4me1.q.05_peak_67083	chr2	179753696	179756231
h3k4me1.q.05_peak_23510	chr12	53629204	53633070
h3k4me1.q.05_peak_59943	chr2	42303520	42306711
h3k4me1.q.05_peak_83029	chr5	35140557	35144101
h3k4me1.q.05_peak_92107	chr6	72754431	72756264
h3k4me1.q.05_peak_6882	chr1	166907912	166909411
h3k4me1.q.05_peak_100452	chr7	117635360	117636550
h3k4me1.q.05_peak_44048	chr16	43629496	43631712
h3k4me1.q.05_peak_22230	chr12	27363097	27364827
h3k4me1.q.05_peak_93106	chr6	94214850	94216108
h3k4me1.q.05_peak_92890	chr6	91343291	91350322
h3k4me1.q.05_peak_31206	chr13	101305087	101306708
h3k4me1.q.05_peak_72339	chr3	123809805	123811845
h3k4me1.q.05_peak_61505	chr2	71193670	71195255
h3k4me1.q.05_peak_12922	chr10	94171475	94173602
h3k4me1.q.05_peak_86550	chr5	111842031	111845526
h3k4me1.q.05_peak_30306	chr13	83216191	83217697
h3k4me1.q.05_peak_106277	chr8	97232454	97234241
h3k4me1.q.05_peak_99947	chr7	109966414	109967176
h3k4me1.q.05_peak_46654	chr17	5066740	5068780
h3k4me1.q.05_peak_31069	chr13	98733179	98733602
h3k4me1.q.05_peak_33117	chr14	25593252	25594630
h3k4me1.q.05_peak_86692	chr5	113045420	113046596
h3k4me1.q.05_peak_77316	chr4	81414329	81417015
h3k4me1.q.05_peak_53137	chr18	56555883	56556468
h3k4me1.q.05_peak_114318	chrX	9246967	9250231
h3k4me1.q.05_peak_93286	chr6	97609581	97611169
h3k4me1.q.05_peak_110424	chr9	50968212	50970728
h3k4me1.q.05_peak_46869	chr17	8960187	8962435
h3k4me1.q.05_peak_9148	chr10	17199929	17204823
h3k4me1.q.05_peak_116926	chrX	166748202	166751385
h3k4me1.q.05_peak_92841	chr6	90745717	90747793
h3k4me1.q.05_peak_19818	chr11	101717784	101718914
h3k4me1.q.05_peak_91559	chr6	55481182	55485971
h3k4me1.q.05_peak_106094	chr8	93911439	93913133
h3k4me1.q.05_peak_6369	chr1	157416810	157418463
h3k4me1.q.05_peak_34661	chr14	64309925	64311373
h3k4me1.q.05_peak_91403	chr6	53636346	53645768
h3k4me1.q.05_peak_49424	chr17	67721184	67724736
h3k4me1.q.05_peak_85902	chr5	100029730	100030687
h3k4me1.q.05_peak_76757	chr4	64141285	64144543
h3k4me1.q.05_peak_48515	chr17	47867146	47867463
h3k4me1.q.05_peak_100226	chr7	114841561	114844167
h3k4me1.q.05_peak_56587	chr19	40359847	40362949
h3k4me1.q.05_peak_62005	chr2	78693731	78696245
h3k4me1.q.05_peak_73804	chr3	151565356	151566809
h3k4me1.q.05_peak_70646	chr3	87390844	87391177
h3k4me1.q.05_peak_14196	chr10	119098149	119099462
h3k4me1.q.05_peak_26153	chr12	107878909	107880042
h3k4me1.q.05_peak_78453	chr4	100973160	100975540
h3k4me1.q.05_peak_21654	chr12	10653885	10656016
h3k4me1.q.05_peak_70824	chr3	89723043	89723857
h3k4me1.q.05_peak_37392	chr15	5847084	5848569
h3k4me1.q.05_peak_65627	chr2	156355733	156356497
h3k4me1.q.05_peak_94285	chr6	114885940	114889592
h3k4me1.q.05_peak_58130	chr2	6607475	6611513
h3k4me1.q.05_peak_107955	chr8	126886874	126887507
h3k4me1.q.05_peak_38475	chr15	36064791	36067475
h3k4me1.q.05_peak_42985	chr16	25959453	25961070
h3k4me1.q.05_peak_13821	chr10	111546948	111548915
h3k4me1.q.05_peak_107500	chr8	120523300	120528406
h3k4me1.q.05_peak_98573	chr7	79284158	79285936
h3k4me1.q.05_peak_54902	chr19	3636794	3639331
h3k4me1.q.05_peak_29806	chr13	70214714	70218312
h3k4me1.q.05_peak_70860	chr3	90383715	90384422
h3k4me1.q.05_peak_25362	chr12	93281330	93282606
h3k4me1.q.05_peak_81321	chr4	150312200	150313105
h3k4me1.q.05_peak_39405	chr15	58650561	58651786
h3k4me1.q.05_peak_78471	chr4	101376277	101377628
h3k4me1.q.05_peak_87440	chr5	124042972	124047199
h3k4me1.q.05_peak_59120	chr2	28546152	28546540
h3k4me1.q.05_peak_113735	chr9	115379605	115381473
h3k4me1.q.05_peak_110174	chr9	47560255	47561497
h3k4me1.q.05_peak_21976	chr12	17238574	17239761
h3k4me1.q.05_peak_111035	chr9	61407592	61409614
h3k4me1.q.05_peak_23768	chr12	58802669	58804916
h3k4me1.q.05_peak_71930	chr3	116409083	116411550
h3k4me1.q.05_peak_305	chr1	14268142	14268978
h3k4me1.q.05_peak_113582	chr9	112130207	112131620
h3k4me1.q.05_peak_60548	chr2	53099891	53100753
h3k4me1.q.05_peak_89892	chr6	22692633	22693714
h3k4me1.q.05_peak_7239	chr1	172177385	172178222
h3k4me1.q.05_peak_79861	chr4	127907359	127907899
h3k4me1.q.05_peak_57658	chr19	58058998	58065279
h3k4me1.q.05_peak_52972	chr18	54580024	54581438
h3k4me1.q.05_peak_3697	chr1	89182572	89184692
h3k4me1.q.05_peak_104568	chr8	61355093	61356834
h3k4me1.q.05_peak_32817	chr14	21426790	21429081
h3k4me1.q.05_peak_49929	chr17	78993512	78994505
h3k4me1.q.05_peak_75314	chr4	32298729	32307573
h3k4me1.q.05_peak_80503	chr4	136698349	136705401
h3k4me1.q.05_peak_14912	chr11	4802893	4805512
h3k4me1.q.05_peak_18045	chr11	71762021	71765405
h3k4me1.q.05_peak_70006	chr3	72713477	72714736
h3k4me1.q.05_peak_78280	chr4	98020777	98021048
h3k4me1.q.05_peak_11993	chr10	77876505	77877810
h3k4me1.q.05_peak_94126	chr6	112868995	112869275
h3k4me1.q.05_peak_76262	chr4	53511411	53514890
h3k4me1.q.05_peak_67295	chr3	5413837	5416764
h3k4me1.q.05_peak_8563	chr10	3721538	3723634
h3k4me1.q.05_peak_84295	chr5	64860955	64863049
h3k4me1.q.05_peak_84348	chr5	65757293	65758501
h3k4me1.q.05_peak_101832	chr7	143594659	143595408
h3k4me1.q.05_peak_50764	chr18	5027943	5029070
h3k4me1.q.05_peak_89230	chr6	6080254	6081552
h3k4me1.q.05_peak_22170	chr12	26679105	26681806
h3k4me1.q.05_peak_8954	chr10	12595063	12596214
h3k4me1.q.05_peak_83862	chr5	52428373	52430540
h3k4me1.q.05_peak_45758	chr16	85120375	85121859
h3k4me1.q.05_peak_82554	chr5	23992050	23995869
h3k4me1.q.05_peak_81650	chr4	154577302	154589286
h3k4me1.q.05_peak_70068	chr3	76093267	76093997
h3k4me1.q.05_peak_89052	chr5	151056335	151056853
h3k4me1.q.05_peak_30242	chr13	81568977	81572228
h3k4me1.q.05_peak_100829	chr7	126066291	126068996
h3k4me1.q.05_peak_22506	chr12	31993195	31994276
h3k4me1.q.05_peak_84799	chr5	74259908	74261919
h3k4me1.q.05_peak_85359	chr5	89040630	89041716
h3k4me1.q.05_peak_49490	chr17	69289744	69290502
h3k4me1.q.05_peak_15492	chr11	20347132	20348593
h3k4me1.q.05_peak_7445	chr1	177007879	177011858
h3k4me1.q.05_peak_39393	chr15	58428745	58430511
h3k4me1.q.05_peak_65753	chr2	157780468	157781210
h3k4me1.q.05_peak_94163	chr6	113096430	113097291
h3k4me1.q.05_peak_46357	chr16	94647213	94648372
h3k4me1.q.05_peak_113437	chr9	108521673	108522587
h3k4me1.q.05_peak_63652	chr2	117427888	117431017
h3k4me1.q.05_peak_77787	chr4	87822755	87824025
h3k4me1.q.05_peak_42332	chr16	11384365	11385236
h3k4me1.q.05_peak_60580	chr2	53851422	53852825
h3k4me1.q.05_peak_10757	chr10	52777889	52780791
h3k4me1.q.05_peak_45602	chr16	79108631	79110542
h3k4me1.q.05_peak_110183	chr9	47603680	47606844
h3k4me1.q.05_peak_25364	chr12	93415630	93417442
h3k4me1.q.05_peak_2014	chr1	57846322	57848455
h3k4me1.q.05_peak_83617	chr5	46447636	46449630
h3k4me1.q.05_peak_112991	chr9	101710122	101711365
h3k4me1.q.05_peak_18264	chr11	76168588	76171511
h3k4me1.q.05_peak_83494	chr5	44426664	44429095
h3k4me1.q.05_peak_49458	chr17	68752624	68754124
h3k4me1.q.05_peak_77377	chr4	82335198	82348629
h3k4me1.q.05_peak_99291	chr7	96355446	96358485
h3k4me1.q.05_peak_53009	chr18	54937195	54937445
h3k4me1.q.05_peak_79383	chr4	119460342	119464855
h3k4me1.q.05_peak_74777	chr4	17634952	17637680
h3k4me1.q.05_peak_3847	chr1	91199910	91201872
h3k4me1.q.05_peak_99377	chr7	96825533	96827072
h3k4me1.q.05_peak_2083	chr1	59332039	59335440
h3k4me1.q.05_peak_38785	chr15	41067891	41073074
h3k4me1.q.05_peak_77954	chr4	91229109	91229525
h3k4me1.q.05_peak_89574	chr6	15729672	15731614
h3k4me1.q.05_peak_57012	chr19	46553352	46553836
h3k4me1.q.05_peak_82785	chr5	29584233	29584503
h3k4me1.q.05_peak_17267	chr11	56601146	56602187
h3k4me1.q.05_peak_113284	chr9	106337634	106340117
h3k4me1.q.05_peak_60009	chr2	44015941	44018427
h3k4me1.q.05_peak_62840	chr2	102035968	102041470
h3k4me1.q.05_peak_28649	chr13	46516843	46517851
h3k4me1.q.05_peak_117034	chrY	90802023	90804212
h3k4me1.q.05_peak_63563	chr2	116037402	116038967
h3k4me1.q.05_peak_79894	chr4	128419505	128423494
h3k4me1.q.05_peak_49377	chr17	67006881	67008138
h3k4me1.q.05_peak_77283	chr4	80828006	80829062
h3k4me1.q.05_peak_52877	chr18	52841315	52842924
h3k4me1.q.05_peak_65920	chr2	160618342	160622404
h3k4me1.q.05_peak_32844	chr14	21605989	21606407
h3k4me1.q.05_peak_27951	chr13	34192680	34194312
h3k4me1.q.05_peak_21314	chr12	3384739	3386561
h3k4me1.q.05_peak_77581	chr4	84522312	84525947
h3k4me1.q.05_peak_104815	chr8	68807780	68809234
h3k4me1.q.05_peak_35093	chr14	72041471	72043646
h3k4me1.q.05_peak_65750	chr2	157766414	157767627
h3k4me1.q.05_peak_103525	chr8	36269493	36271181
h3k4me1.q.05_peak_108358	chr9	13689447	13691189
h3k4me1.q.05_peak_83654	chr5	47772343	47774051
h3k4me1.q.05_peak_43584	chr16	35627611	35628475
h3k4me1.q.05_peak_64119	chr2	127136025	127138647
h3k4me1.q.05_peak_97558	chr7	60438460	60439473
h3k4me1.q.05_peak_111476	chr9	67572709	67574511
h3k4me1.q.05_peak_49350	chr17	66685870	66689324
h3k4me1.q.05_peak_22349	chr12	29348431	29349978
h3k4me1.q.05_peak_65772	chr2	157953788	157955669
h3k4me1.q.05_peak_35459	chr14	77670553	77674326
h3k4me1.q.05_peak_1474	chr1	43357907	43359178
h3k4me1.q.05_peak_76106	chr4	48991451	48993579
h3k4me1.q.05_peak_14838	chr11	3395839	3397883
h3k4me1.q.05_peak_109886	chr9	43480755	43483516
h3k4me1.q.05_peak_46619	chr17	4562820	4564215
h3k4me1.q.05_peak_97699	chr7	64550348	64551676
h3k4me1.q.05_peak_59201	chr2	29485177	29489995
h3k4me1.q.05_peak_44110	chr16	44695397	44696586
h3k4me1.q.05_peak_69365	chr3	56067605	56068847
h3k4me1.q.05_peak_113154	chr9	103691579	103694056
h3k4me1.q.05_peak_99426	chr7	97386329	97388514
h3k4me1.q.05_peak_54020	chr18	72152912	72154361
h3k4me1.q.05_peak_102342	chr8	11779149	11781057
h3k4me1.q.05_peak_100819	chr7	126011795	126013475
h3k4me1.q.05_peak_73084	chr3	138712118	138714704
h3k4me1.q.05_peak_41038	chr15	87667368	87668627
h3k4me1.q.05_peak_10404	chr10	43349446	43351230
h3k4me1.q.05_peak_79998	chr4	129791196	129791943
h3k4me1.q.05_peak_76064	chr4	48076624	48081078
h3k4me1.q.05_peak_66491	chr2	168625964	168627397
h3k4me1.q.05_peak_28679	chr13	46945720	46946983
h3k4me1.q.05_peak_44039	chr16	43556790	43557758
h3k4me1.q.05_peak_32699	chr14	19918964	19922316
h3k4me1.q.05_peak_41700	chr15	99333644	99334898
h3k4me1.q.05_peak_112107	chr9	83315665	83318035
h3k4me1.q.05_peak_45136	chr16	71390311	71392871
h3k4me1.q.05_peak_18446	chr11	78788827	78793767
h3k4me1.q.05_peak_69612	chr3	63530696	63533406
h3k4me1.q.05_peak_71397	chr3	104395832	104397756
h3k4me1.q.05_peak_109974	chr9	44565156	44566094
h3k4me1.q.05_peak_84447	chr5	66864828	66867314
h3k4me1.q.05_peak_83824	chr5	51757074	51759198
h3k4me1.q.05_peak_77412	chr4	82554161	82557366
h3k4me1.q.05_peak_90671	chr6	37430668	37432541
h3k4me1.q.05_peak_46059	chr16	90663177	90665521
h3k4me1.q.05_peak_91991	chr6	71080843	71082552
h3k4me1.q.05_peak_49692	chr17	72966097	72967501
h3k4me1.q.05_peak_99378	chr7	96830532	96836348
h3k4me1.q.05_peak_20784	chr11	115778870	115781295
h3k4me1.q.05_peak_68683	chr3	40101827	40103952
h3k4me1.q.05_peak_90658	chr6	37241266	37246856
h3k4me1.q.05_peak_62623	chr2	94342916	94343111
h3k4me1.q.05_peak_16317	chr11	35959627	35960006
h3k4me1.q.05_peak_13185	chr10	97491877	97493389
h3k4me1.q.05_peak_30790	chr13	94374597	94377127
h3k4me1.q.05_peak_107235	chr8	116619377	116622781
h3k4me1.q.05_peak_63725	chr2	118519155	118520939
h3k4me1.q.05_peak_33276	chr14	29203608	29205433
h3k4me1.q.05_peak_80786	chr4	140083979	140085152
h3k4me1.q.05_peak_106688	chr8	106984952	106986233
h3k4me1.q.05_peak_3506	chr1	84494787	84495651
h3k4me1.q.05_peak_98985	chr7	89766129	89770742
h3k4me1.q.05_peak_77486	chr4	83185740	83188078
h3k4me1.q.05_peak_51213	chr18	16025788	16030557
h3k4me1.q.05_peak_42469	chr16	16498428	16499433
h3k4me1.q.05_peak_65450	chr2	153139803	153140910
h3k4me1.q.05_peak_21476	chr12	5681213	5683202
h3k4me1.q.05_peak_21468	chr12	5442962	5444635
h3k4me1.q.05_peak_5112	chr1	132039892	132040856
h3k4me1.q.05_peak_35003	chr14	70316883	70317543
h3k4me1.q.05_peak_10550	chr10	46051105	46051759
h3k4me1.q.05_peak_38252	chr15	31022168	31022448
h3k4me1.q.05_peak_27655	chr13	28450684	28452225
h3k4me1.q.05_peak_6869	chr1	166749969	166751685
h3k4me1.q.05_peak_1511	chr1	43772783	43773153
h3k4me1.q.05_peak_64593	chr2	135759521	135760237
h3k4me1.q.05_peak_1210	chr1	38511476	38513218
h3k4me1.q.05_peak_36648	chr14	107750909	107751578
h3k4me1.q.05_peak_108933	chr9	27122479	27124694
h3k4me1.q.05_peak_93055	chr6	93855542	93858623
h3k4me1.q.05_peak_82631	chr5	24820764	24821295
h3k4me1.q.05_peak_82224	chr5	16224870	16226546
h3k4me1.q.05_peak_93251	chr6	97348973	97350725
h3k4me1.q.05_peak_22752	chr12	36132539	36133431
h3k4me1.q.05_peak_5689	chr1	140264604	140267463
h3k4me1.q.05_peak_54157	chr18	74894938	74897402
h3k4me1.q.05_peak_99549	chr7	98990324	98991044
h3k4me1.q.05_peak_24974	chr12	85858030	85860762
h3k4me1.q.05_peak_99315	chr7	96470346	96471247
h3k4me1.q.05_peak_5653	chr1	139048766	139050996
h3k4me1.q.05_peak_83667	chr5	48056507	48062687
h3k4me1.q.05_peak_98986	chr7	89773200	89774981
h3k4me1.q.05_peak_14723	chr10	127924862	127925839
h3k4me1.q.05_peak_99480	chr7	98149172	98150344
h3k4me1.q.05_peak_65152	chr2	146284651	146288750
h3k4me1.q.05_peak_8465	chr1	194310042	194311716
h3k4me1.q.05_peak_10994	chr10	58931313	58933317
h3k4me1.q.05_peak_61508	chr2	71242698	71246673
h3k4me1.q.05_peak_15096	chr11	8584248	8588069
h3k4me1.q.05_peak_31714	chr13	109992500	109993794
h3k4me1.q.05_peak_53246	chr18	57984594	57986312
h3k4me1.q.05_peak_103483	chr8	35958423	35963124
h3k4me1.q.05_peak_63548	chr2	115950199	115951188
h3k4me1.q.05_peak_36058	chr14	93825284	93828401
h3k4me1.q.05_peak_84715	chr5	73208691	73210824
h3k4me1.q.05_peak_66331	chr2	166686350	166688138
h3k4me1.q.05_peak_94927	chr6	128004148	128007979
h3k4me1.q.05_peak_22118	chr12	25864790	25864998
h3k4me1.q.05_peak_52992	chr18	54826694	54830431
h3k4me1.q.05_peak_54317	chr18	77114579	77116028
h3k4me1.q.05_peak_79388	chr4	119554922	119556173
h3k4me1.q.05_peak_69406	chr3	57294105	57295785
h3k4me1.q.05_peak_94286	chr6	114890134	114894840
h3k4me1.q.05_peak_73648	chr3	148837578	148842590
h3k4me1.q.05_peak_23340	chr12	51185253	51191876
h3k4me1.q.05_peak_78520	chr4	102494953	102497520
h3k4me1.q.05_peak_82251	chr5	16999159	17000269
h3k4me1.q.05_peak_5448	chr1	135669456	135671235
h3k4me1.q.05_peak_85077	chr5	80277838	80278281
h3k4me1.q.05_peak_93130	chr6	94575108	94579676
h3k4me1.q.05_peak_11405	chr10	66993773	66995667
h3k4me1.q.05_peak_5685	chr1	139458091	139461945
h3k4me1.q.05_peak_5070	chr1	131350709	131352614
h3k4me1.q.05_peak_107298	chr8	117988380	117989372
h3k4me1.q.05_peak_92287	chr6	78250058	78251438
h3k4me1.q.05_peak_19234	chr11	91461752	91465135
h3k4me1.q.05_peak_88834	chr5	147501042	147501781
h3k4me1.q.05_peak_36988	chr14	118361911	118364065
h3k4me1.q.05_peak_87284	chr5	121778409	121779313
h3k4me1.q.05_peak_71600	chr3	107806634	107809262
h3k4me1.q.05_peak_73093	chr3	138766174	138772172
h3k4me1.q.05_peak_17991	chr11	70595756	70597102
h3k4me1.q.05_peak_32822	chr14	21487793	21491174
h3k4me1.q.05_peak_29115	chr13	54265620	54267480
h3k4me1.q.05_peak_116127	chrX	130264755	130267644
h3k4me1.q.05_peak_39592	chr15	62282110	62287581
h3k4me1.q.05_peak_17332	chr11	57623739	57625336
h3k4me1.q.05_peak_72542	chr3	127958413	127960086
h3k4me1.q.05_peak_36032	chr14	93516111	93517425
h3k4me1.q.05_peak_63178	chr2	106787190	106800240
h3k4me1.q.05_peak_94699	chr6	124693595	124694845
h3k4me1.q.05_peak_92221	chr6	77217551	77222063
h3k4me1.q.05_peak_65690	chr2	157306555	157308900
h3k4me1.q.05_peak_73665	chr3	148932397	148933207
h3k4me1.q.05_peak_91542	chr6	55357208	55358152
h3k4me1.q.05_peak_76961	chr4	70229691	70230044
h3k4me1.q.05_peak_50354	chr17	85995257	85996302
h3k4me1.q.05_peak_26472	chr12	112375800	112379433
h3k4me1.q.05_peak_92688	chr6	88270717	88272098
h3k4me1.q.05_peak_67411	chr3	9189186	9190581
h3k4me1.q.05_peak_43225	chr16	30826063	30827859
h3k4me1.q.05_peak_97540	chr7	58821086	58823050
h3k4me1.q.05_peak_3513	chr1	84588781	84591635
h3k4me1.q.05_peak_106343	chr8	99344970	99346163
h3k4me1.q.05_peak_15117	chr11	8806945	8807284
h3k4me1.q.05_peak_81340	chr4	150447612	150450645
h3k4me1.q.05_peak_15099	chr11	8610041	8611587
h3k4me1.q.05_peak_51062	chr18	13396302	13400828
h3k4me1.q.05_peak_114024	chr9	120759495	120760364
h3k4me1.q.05_peak_38852	chr15	42652122	42654914
h3k4me1.q.05_peak_980	chr1	34388139	34390217
h3k4me1.q.05_peak_34248	chr14	57604723	57605509
h3k4me1.q.05_peak_55298	chr19	10433255	10434868
h3k4me1.q.05_peak_83301	chr5	38808440	38809737
h3k4me1.q.05_peak_37653	chr15	12605081	12605914
h3k4me1.q.05_peak_40824	chr15	84809255	84810240
h3k4me1.q.05_peak_34726	chr14	65135144	65137207
h3k4me1.q.05_peak_76754	chr4	64023963	64024412
h3k4me1.q.05_peak_11969	chr10	77367449	77368795
h3k4me1.q.05_peak_81713	chr4	155188494	155191294
h3k4me1.q.05_peak_50605	chr17	90059227	90062730
h3k4me1.q.05_peak_28331	chr13	42401548	42402334
h3k4me1.q.05_peak_24921	chr12	84910688	84913900
h3k4me1.q.05_peak_97719	chr7	64723468	64724991
h3k4me1.q.05_peak_109571	chr9	39557068	39558752
h3k4me1.q.05_peak_41763	chr15	100066261	100067244
h3k4me1.q.05_peak_77392	chr4	82459543	82462559
h3k4me1.q.05_peak_91601	chr6	55923706	55924699
h3k4me1.q.05_peak_34596	chr14	63408295	63410959
h3k4me1.q.05_peak_32026	chr13	115050264	115051452
h3k4me1.q.05_peak_68978	chr3	50922439	50925609
h3k4me1.q.05_peak_53764	chr18	67569329	67572367
h3k4me1.q.05_peak_92241	chr6	77357576	77358987
h3k4me1.q.05_peak_68773	chr3	41592502	41593247
h3k4me1.q.05_peak_6506	chr1	159685555	159688537
h3k4me1.q.05_peak_83626	chr5	46796610	46798085
h3k4me1.q.05_peak_103862	chr8	45692514	45693781
h3k4me1.q.05_peak_51668	chr18	27581377	27584857
h3k4me1.q.05_peak_8145	chr1	188455342	188459125
h3k4me1.q.05_peak_95369	chr6	140444282	140445530
h3k4me1.q.05_peak_73381	chr3	144376916	144381769
h3k4me1.q.05_peak_35147	chr14	73225583	73228183
h3k4me1.q.05_peak_85784	chr5	98938498	98938951
h3k4me1.q.05_peak_88937	chr5	149152477	149153155
h3k4me1.q.05_peak_11651	chr10	70636936	70642294
h3k4me1.q.05_peak_25100	chr12	87042331	87045523
h3k4me1.q.05_peak_53606	chr18	64930714	64934433
h3k4me1.q.05_peak_64225	chr2	129231395	129233660
h3k4me1.q.05_peak_64562	chr2	135380412	135382250
h3k4me1.q.05_peak_37720	chr15	13634279	13636925
h3k4me1.q.05_peak_10020	chr10	37376797	37380630
h3k4me1.q.05_peak_6330	chr1	156989121	156991577
h3k4me1.q.05_peak_46751	chr17	6118624	6119366
h3k4me1.q.05_peak_38345	chr15	32277851	32279642
h3k4me1.q.05_peak_109348	chr9	34421592	34423783
h3k4me1.q.05_peak_110320	chr9	49605522	49607748
h3k4me1.q.05_peak_103267	chr8	32637120	32640200
h3k4me1.q.05_peak_92247	chr6	77424706	77426288
h3k4me1.q.05_peak_102334	chr8	11642930	11643591
h3k4me1.q.05_peak_45009	chr16	67123662	67125680
h3k4me1.q.05_peak_14324	chr10	120800643	120803012
h3k4me1.q.05_peak_351	chr1	15615624	15617999
h3k4me1.q.05_peak_94267	chr6	114718756	114719943
h3k4me1.q.05_peak_52690	chr18	47249275	47251540
h3k4me1.q.05_peak_26029	chr12	106102462	106104098
h3k4me1.q.05_peak_48257	chr17	43076739	43078171
h3k4me1.q.05_peak_76914	chr4	68403798	68405067
h3k4me1.q.05_peak_45763	chr16	85138918	85140185
h3k4me1.q.05_peak_8597	chr10	4086578	4089146
h3k4me1.q.05_peak_21543	chr12	7520613	7522565
h3k4me1.q.05_peak_32978	chr14	24065202	24067060
h3k4me1.q.05_peak_11018	chr10	59334307	59335885
h3k4me1.q.05_peak_39885	chr15	68946362	68952084
h3k4me1.q.05_peak_68435	chr3	35402699	35407442
h3k4me1.q.05_peak_46653	chr17	5064313	5065987
h3k4me1.q.05_peak_57273	chr19	51059213	51060771
h3k4me1.q.05_peak_9348	chr10	20284862	20287584
h3k4me1.q.05_peak_87854	chr5	131628805	131632753
h3k4me1.q.05_peak_115571	chrX	85040486	85042706
h3k4me1.q.05_peak_24492	chr12	78095099	78100621
h3k4me1.q.05_peak_44459	chr16	52092804	52094560
h3k4me1.q.05_peak_101370	chr7	135125449	135127503
h3k4me1.q.05_peak_33526	chr14	34465628	34467915
h3k4me1.q.05_peak_53822	chr18	68550365	68551302
h3k4me1.q.05_peak_24913	chr12	84751014	84753770
h3k4me1.q.05_peak_20187	chr11	107949037	107952955
h3k4me1.q.05_peak_76954	chr4	70035805	70036492
h3k4me1.q.05_peak_24361	chr12	75520006	75521186
h3k4me1.q.05_peak_112972	chr9	101445635	101446367
h3k4me1.q.05_peak_77348	chr4	81936490	81938061
h3k4me1.q.05_peak_93533	chr6	100243515	100245225
h3k4me1.q.05_peak_69608	chr3	63412004	63414764
h3k4me1.q.05_peak_39871	chr15	68535003	68537415
h3k4me1.q.05_peak_100421	chr7	117450907	117453138
h3k4me1.q.05_peak_38558	chr15	37288562	37289290
h3k4me1.q.05_peak_54344	chr18	77524079	77525641
h3k4me1.q.05_peak_24614	chr12	79968636	79972028
h3k4me1.q.05_peak_109342	chr9	34331650	34336454
h3k4me1.q.05_peak_115926	chrX	103562850	103565872
h3k4me1.q.05_peak_83503	chr5	44536606	44540993
h3k4me1.q.05_peak_8378	chr1	193315740	193317397
h3k4me1.q.05_peak_43395	chr16	33560222	33561153
h3k4me1.q.05_peak_72668	chr3	130493937	130494960
h3k4me1.q.05_peak_28457	chr13	43990100	43992610
h3k4me1.q.05_peak_22124	chr12	25925516	25927357
h3k4me1.q.05_peak_40100	chr15	73885924	73887891
h3k4me1.q.05_peak_78811	chr4	106785184	106787596
h3k4me1.q.05_peak_1952	chr1	56925031	56930140
h3k4me1.q.05_peak_93066	chr6	93923237	93924824
h3k4me1.q.05_peak_38660	chr15	39017975	39019087
h3k4me1.q.05_peak_25747	chr12	100716764	100717874
h3k4me1.q.05_peak_13418	chr10	103831187	103833370
h3k4me1.q.05_peak_93956	chr6	108424377	108428098
h3k4me1.q.05_peak_63470	chr2	115119137	115121082
h3k4me1.q.05_peak_16924	chr11	48250517	48252037
h3k4me1.q.05_peak_93165	chr6	95086677	95088207
h3k4me1.q.05_peak_34431	chr14	60999656	60999981
h3k4me1.q.05_peak_114882	chrX	48168807	48172322
h3k4me1.q.05_peak_16355	chr11	36241621	36246326
h3k4me1.q.05_peak_86010	chr5	101932694	101934993
h3k4me1.q.05_peak_101297	chr7	133742578	133745498
h3k4me1.q.05_peak_4311	chr1	106582581	106585769
h3k4me1.q.05_peak_59407	chr2	32446992	32448889
h3k4me1.q.05_peak_7843	chr1	182963337	182966074
h3k4me1.q.05_peak_109680	chr9	41334463	41335680
h3k4me1.q.05_peak_77470	chr4	82957799	82958389
h3k4me1.q.05_peak_21106	chr11	118953907	118958978
h3k4me1.q.05_peak_87429	chr5	124002985	124003245
h3k4me1.q.05_peak_77956	chr4	91233770	91240367
h3k4me1.q.05_peak_113633	chr9	113268780	113271151
h3k4me1.q.05_peak_108794	chr9	23495471	23499008
h3k4me1.q.05_peak_17153	chr11	53494542	53497255
h3k4me1.q.05_peak_101437	chr7	136080946	136085701
h3k4me1.q.05_peak_101218	chr7	132779793	132782620
h3k4me1.q.05_peak_65712	chr2	157480389	157483575
h3k4me1.q.05_peak_64379	chr2	131992282	131994958
h3k4me1.q.05_peak_86420	chr5	110611233	110612131
h3k4me1.q.05_peak_34672	chr14	64377192	64380122
h3k4me1.q.05_peak_103961	chr8	47232473	47233847
h3k4me1.q.05_peak_59119	chr2	28545595	28545916
h3k4me1.q.05_peak_67809	chr3	21556777	21559807
h3k4me1.q.05_peak_30569	chr13	90641399	90647545
h3k4me1.q.05_peak_59805	chr2	38532981	38534217
h3k4me1.q.05_peak_77636	chr4	85301807	85303532
h3k4me1.q.05_peak_39782	chr15	66557819	66561019
h3k4me1.q.05_peak_45770	chr16	85199087	85200726
h3k4me1.q.05_peak_99503	chr7	98402040	98405246
h3k4me1.q.05_peak_3162	chr1	77520410	77523048
h3k4me1.q.05_peak_108232	chr9	9872067	9872991
h3k4me1.q.05_peak_109786	chr9	42438673	42440329
h3k4me1.q.05_peak_96713	chr7	35667643	35669257
h3k4me1.q.05_peak_117035	chrY	90804754	90808453
h3k4me1.q.05_peak_27597	chr13	26119129	26119745
h3k4me1.q.05_peak_28449	chr13	43930171	43932255
h3k4me1.q.05_peak_40208	chr15	75804839	75806032
h3k4me1.q.05_peak_80581	chr4	137484072	137490515
h3k4me1.q.05_peak_51238	chr18	16610201	16612293
h3k4me1.q.05_peak_61324	chr2	67822183	67822878
h3k4me1.q.05_peak_114058	chr9	121044138	121045883
h3k4me1.q.05_peak_114096	chr9	121434193	121434464
h3k4me1.q.05_peak_99790	chr7	102370037	102370425
h3k4me1.q.05_peak_69631	chr3	63834797	63836718
h3k4me1.q.05_peak_57897	chr2	3762509	3766976
h3k4me1.q.05_peak_57632	chr19	57580831	57581911
h3k4me1.q.05_peak_81065	chr4	144929515	144931168
h3k4me1.q.05_peak_29778	chr13	69932896	69935163
h3k4me1.q.05_peak_24585	chr12	79748810	79753022
h3k4me1.q.05_peak_13084	chr10	96148063	96149201
h3k4me1.q.05_peak_36852	chr14	116916308	116918322
h3k4me1.q.05_peak_13519	chr10	106680538	106682192
h3k4me1.q.05_peak_95411	chr6	140945769	140947642
h3k4me1.q.05_peak_56979	chr19	46215115	46215879
h3k4me1.q.05_peak_23918	chr12	67617513	67621212
h3k4me1.q.05_peak_86970	chr5	116888955	116890063
h3k4me1.q.05_peak_84792	chr5	74214025	74215822
h3k4me1.q.05_peak_103140	chr8	30641708	30644268
h3k4me1.q.05_peak_38614	chr15	38066216	38069013
h3k4me1.q.05_peak_73238	chr3	141893706	141900007
h3k4me1.q.05_peak_28756	chr13	48030527	48032113
h3k4me1.q.05_peak_76137	chr4	49278168	49279650
h3k4me1.q.05_peak_28544	chr13	44890238	44893143
h3k4me1.q.05_peak_44164	chr16	45899411	45900794
h3k4me1.q.05_peak_28645	chr13	46433489	46435280
h3k4me1.q.05_peak_95564	chr6	143958682	143959613
h3k4me1.q.05_peak_67952	chr3	26011003	26013644
h3k4me1.q.05_peak_91248	chr6	51730554	51733961
h3k4me1.q.05_peak_85642	chr5	96747082	96748349
h3k4me1.q.05_peak_5871	chr1	149670115	149672904
h3k4me1.q.05_peak_51542	chr18	25118568	25118821
h3k4me1.q.05_peak_82414	chr5	21135885	21137029
h3k4me1.q.05_peak_13030	chr10	95309571	95312409
h3k4me1.q.05_peak_11934	chr10	76881651	76884398
h3k4me1.q.05_peak_10768	chr10	52839624	52841844
h3k4me1.q.05_peak_110426	chr9	50974045	50975730
h3k4me1.q.05_peak_84251	chr5	64336353	64337702
h3k4me1.q.05_peak_32854	chr14	21673954	21674902
h3k4me1.q.05_peak_18937	chr11	87682675	87683925
h3k4me1.q.05_peak_87119	chr5	118638917	118640201
h3k4me1.q.05_peak_62717	chr2	97563798	97566249
h3k4me1.q.05_peak_73346	chr3	143981631	143986577
h3k4me1.q.05_peak_24830	chr12	83475313	83477003
h3k4me1.q.05_peak_72515	chr3	127727697	127730585
h3k4me1.q.05_peak_36863	chr14	116977967	116980225
h3k4me1.q.05_peak_98579	chr7	79321970	79324509
h3k4me1.q.05_peak_89463	chr6	12380645	12382321
h3k4me1.q.05_peak_41991	chr15	103626294	103628275
h3k4me1.q.05_peak_53166	chr18	56868835	56869691
h3k4me1.q.05_peak_37486	chr15	8655117	8656307
h3k4me1.q.05_peak_83281	chr5	38537502	38539177
h3k4me1.q.05_peak_80027	chr4	130054473	130057329
h3k4me1.q.05_peak_31356	chr13	103838156	103839195
h3k4me1.q.05_peak_44524	chr16	53439418	53440628
h3k4me1.q.05_peak_21434	chr12	5210347	5217511
h3k4me1.q.05_peak_109016	chr9	28148696	28153338
h3k4me1.q.05_peak_41809	chr15	100922901	100924611
h3k4me1.q.05_peak_115895	chrX	102115460	102115810
h3k4me1.q.05_peak_7482	chr1	177377242	177378850
h3k4me1.q.05_peak_20294	chr11	109431729	109432647
h3k4me1.q.05_peak_82392	chr5	20749399	20754167
h3k4me1.q.05_peak_102483	chr8	13640202	13641552
h3k4me1.q.05_peak_99358	chr7	96738922	96748149
h3k4me1.q.05_peak_13785	chr10	111129758	111130915
h3k4me1.q.05_peak_3937	chr1	92742091	92747387
h3k4me1.q.05_peak_30486	chr13	89393878	89396860
h3k4me1.q.05_peak_99804	chr7	104711344	104713155
h3k4me1.q.05_peak_87221	chr5	120490063	120491570
h3k4me1.q.05_peak_59724	chr2	37800021	37800610
h3k4me1.q.05_peak_40378	chr15	78668499	78670952
h3k4me1.q.05_peak_105243	chr8	79037125	79038368
h3k4me1.q.05_peak_15237	chr11	13039479	13041301
h3k4me1.q.05_peak_81536	chr4	152878457	152879916
h3k4me1.q.05_peak_48574	chr17	48773691	48777397
h3k4me1.q.05_peak_81336	chr4	150401689	150406139
h3k4me1.q.05_peak_88040	chr5	133106672	133107822
h3k4me1.q.05_peak_72154	chr3	120981802	120984794
h3k4me1.q.05_peak_32782	chr14	21140655	21148510
h3k4me1.q.05_peak_92136	chr6	73433217	73434789
h3k4me1.q.05_peak_18406	chr11	78151701	78154349
h3k4me1.q.05_peak_95050	chr6	134236228	134236555
h3k4me1.q.05_peak_25625	chr12	99351374	99353700
h3k4me1.q.05_peak_111873	chr9	76137529	76139366
h3k4me1.q.05_peak_34412	chr14	60676324	60677875
h3k4me1.q.05_peak_114097	chr9	121443578	121444815
h3k4me1.q.05_peak_78832	chr4	106946417	106951775
h3k4me1.q.05_peak_18382	chr11	77900705	77905402
h3k4me1.q.05_peak_47099	chr17	12276241	12278941
h3k4me1.q.05_peak_22181	chr12	26819908	26822874
h3k4me1.q.05_peak_76622	chr4	59876500	59877425
h3k4me1.q.05_peak_57073	chr19	47497001	47498373
h3k4me1.q.05_peak_255	chr1	13326676	13327393
h3k4me1.q.05_peak_40040	chr15	73155613	73159173
h3k4me1.q.05_peak_105304	chr8	80324765	80325846
h3k4me1.q.05_peak_59078	chr2	28111766	28112740
h3k4me1.q.05_peak_62376	chr2	91410634	91412137
h3k4me1.q.05_peak_6098	chr1	153280529	153282429
h3k4me1.q.05_peak_46791	chr17	7265095	7268280
h3k4me1.q.05_peak_95570	chr6	143992166	143995792
h3k4me1.q.05_peak_53010	chr18	54938979	54939336
h3k4me1.q.05_peak_48985	chr17	59848474	59849778
h3k4me1.q.05_peak_49504	chr17	69684830	69687427
h3k4me1.q.05_peak_52654	chr18	46723842	46725965
h3k4me1.q.05_peak_80724	chr4	139476130	139477710
h3k4me1.q.05_peak_10624	chr10	49423262	49423950
h3k4me1.q.05_peak_6083	chr1	153134013	153135190
h3k4me1.q.05_peak_79924	chr4	128839780	128841855
h3k4me1.q.05_peak_35750	chr14	85203642	85206723
h3k4me1.q.05_peak_74375	chr4	8604753	8606282
h3k4me1.q.05_peak_113039	chr9	102296362	102300057
h3k4me1.q.05_peak_40101	chr15	73897113	73898485
h3k4me1.q.05_peak_87480	chr5	124836861	124837517
h3k4me1.q.05_peak_71802	chr3	112951570	112953476
h3k4me1.q.05_peak_79775	chr4	126116200	126116550
h3k4me1.q.05_peak_3016	chr1	75797252	75799507
h3k4me1.q.05_peak_110313	chr9	49504458	49505016
h3k4me1.q.05_peak_82213	chr5	16130478	16137630
h3k4me1.q.05_peak_51248	chr18	16733382	16742838
h3k4me1.q.05_peak_78693	chr4	104642069	104646081
h3k4me1.q.05_peak_112182	chr9	84252282	84254453
h3k4me1.q.05_peak_33102	chr14	25467453	25472631
h3k4me1.q.05_peak_78114	chr4	95746762	95748678
h3k4me1.q.05_peak_72480	chr3	127400827	127401923
h3k4me1.q.05_peak_34510	chr14	62170223	62175775
h3k4me1.q.05_peak_720	chr1	25084482	25089793
h3k4me1.q.05_peak_25817	chr12	102419195	102420057
h3k4me1.q.05_peak_105234	chr8	78741719	78743074
h3k4me1.q.05_peak_38168	chr15	29199978	29200372
h3k4me1.q.05_peak_47151	chr17	13581475	13584950
h3k4me1.q.05_peak_54423	chr18	78791238	78793260
h3k4me1.q.05_peak_92318	chr6	80104756	80106226
h3k4me1.q.05_peak_104899	chr8	70407743	70409950
h3k4me1.q.05_peak_87112	chr5	118596009	118603237
h3k4me1.q.05_peak_87237	chr5	120653559	120654423
h3k4me1.q.05_peak_36867	chr14	117017453	117021043
h3k4me1.q.05_peak_27230	chr13	19601055	19603044
h3k4me1.q.05_peak_113324	chr9	107258533	107261433
h3k4me1.q.05_peak_11773	chr10	73490744	73492343
h3k4me1.q.05_peak_79990	chr4	129706396	129708196
h3k4me1.q.05_peak_12871	chr10	93373670	93375944
h3k4me1.q.05_peak_79777	chr4	126130741	126131959
h3k4me1.q.05_peak_54652	chr18	82946379	82949494
h3k4me1.q.05_peak_23341	chr12	51194236	51196770
h3k4me1.q.05_peak_50809	chr18	6109259	6110329
h3k4me1.q.05_peak_96387	chr7	27631507	27631941
h3k4me1.q.05_peak_114091	chr9	121387295	121388903
h3k4me1.q.05_peak_99436	chr7	97424807	97425933
h3k4me1.q.05_peak_76356	chr4	55075649	55079615
h3k4me1.q.05_peak_78262	chr4	97889662	97890191
h3k4me1.q.05_peak_7327	chr1	174522070	174523627
h3k4me1.q.05_peak_73956	chr3	154186509	154190087
h3k4me1.q.05_peak_59925	chr2	41674357	41677798
h3k4me1.q.05_peak_112565	chr9	94394949	94396204
h3k4me1.q.05_peak_46890	chr17	9428117	9429342
h3k4me1.q.05_peak_63832	chr2	120413505	120415914
h3k4me1.q.05_peak_68096	chr3	28457412	28458597
h3k4me1.q.05_peak_103873	chr8	45733537	45735180
h3k4me1.q.05_peak_75904	chr4	45687105	45691396
h3k4me1.q.05_peak_68761	chr3	41444206	41444612
h3k4me1.q.05_peak_9235	chr10	18480563	18481320
h3k4me1.q.05_peak_44135	chr16	45242637	45243205
h3k4me1.q.05_peak_25416	chr12	95387533	95389184
h3k4me1.q.05_peak_48168	chr17	35776450	35777822
h3k4me1.q.05_peak_78842	chr4	106991955	106997682
h3k4me1.q.05_peak_73017	chr3	137736689	137738231
h3k4me1.q.05_peak_34554	chr14	62599656	62600877
h3k4me1.q.05_peak_113487	chr9	110047210	110048574
h3k4me1.q.05_peak_60206	chr2	48585747	48587661
h3k4me1.q.05_peak_112594	chr9	94832693	94835545
h3k4me1.q.05_peak_49740	chr17	73790082	73791039
h3k4me1.q.05_peak_72387	chr3	125873682	125875303
h3k4me1.q.05_peak_111133	chr9	62482214	62485053
h3k4me1.q.05_peak_75237	chr4	31525001	31527628
h3k4me1.q.05_peak_55541	chr19	16505596	16507993
h3k4me1.q.05_peak_14840	chr11	3441395	3442997
h3k4me1.q.05_peak_60332	chr2	50103724	50105052
h3k4me1.q.05_peak_99866	chr7	107692617	107695446
h3k4me1.q.05_peak_66557	chr2	169750146	169753161
h3k4me1.q.05_peak_62289	chr2	85212845	85214617
h3k4me1.q.05_peak_42974	chr16	25791902	25793942
h3k4me1.q.05_peak_107852	chr8	125504034	125506870
h3k4me1.q.05_peak_106961	chr8	112138709	112139447
h3k4me1.q.05_peak_19406	chr11	95365941	95366880
h3k4me1.q.05_peak_76664	chr4	62652380	62653970
h3k4me1.q.05_peak_39379	chr15	58186519	58188361
h3k4me1.q.05_peak_28932	chr13	51816057	51818328
h3k4me1.q.05_peak_116180	chrX	133601037	133612023
h3k4me1.q.05_peak_4285	chr1	106221615	106222786
h3k4me1.q.05_peak_107851	chr8	125495336	125496192
h3k4me1.q.05_peak_6100	chr1	153306756	153309610
h3k4me1.q.05_peak_88646	chr5	142876859	142877859
h3k4me1.q.05_peak_93385	chr6	99186316	99194496
h3k4me1.q.05_peak_92088	chr6	72666584	72669135
h3k4me1.q.05_peak_107663	chr8	122943022	122943671
h3k4me1.q.05_peak_6389	chr1	157684043	157684487
h3k4me1.q.05_peak_23217	chr12	48221604	48224122
h3k4me1.q.05_peak_89677	chr6	17762233	17765455
h3k4me1.q.05_peak_268	chr1	13574183	13574796
h3k4me1.q.05_peak_57135	chr19	48300075	48302226
h3k4me1.q.05_peak_68553	chr3	38142027	38144031
h3k4me1.q.05_peak_43441	chr16	34204147	34205935
h3k4me1.q.05_peak_91609	chr6	56310034	56310823
h3k4me1.q.05_peak_94197	chr6	113586370	113587371
h3k4me1.q.05_peak_81853	chr5	4772750	4774533
h3k4me1.q.05_peak_50401	chr17	86415792	86416678
h3k4me1.q.05_peak_76802	chr4	65420027	65421749
h3k4me1.q.05_peak_79021	chr4	109897891	109899292
h3k4me1.q.05_peak_93093	chr6	94094864	94096688
h3k4me1.q.05_peak_2229	chr1	61825615	61826496
h3k4me1.q.05_peak_61345	chr2	68250399	68253497
h3k4me1.q.05_peak_110778	chr9	58099114	58102143
h3k4me1.q.05_peak_111329	chr9	65168692	65170216
h3k4me1.q.05_peak_64135	chr2	127502282	127505125
h3k4me1.q.05_peak_36907	chr14	117519085	117520646
h3k4me1.q.05_peak_93135	chr6	94626466	94633431
h3k4me1.q.05_peak_23247	chr12	49757467	49758185
h3k4me1.q.05_peak_6255	chr1	155502508	155506019
h3k4me1.q.05_peak_53463	chr18	61844722	61846593
h3k4me1.q.05_peak_34105	chr14	54728695	54730443
h3k4me1.q.05_peak_84277	chr5	64579024	64580973
h3k4me1.q.05_peak_5151	chr1	132529956	132531582
h3k4me1.q.05_peak_36410	chr14	102019143	102020851
h3k4me1.q.05_peak_111286	chr9	64503129	64508609
h3k4me1.q.05_peak_53498	chr18	62862117	62866305
h3k4me1.q.05_peak_77364	chr4	82225313	82226363
h3k4me1.q.05_peak_31726	chr13	110138405	110140789
h3k4me1.q.05_peak_67263	chr3	4784666	4785578
h3k4me1.q.05_peak_79320	chr4	118269887	118270471
h3k4me1.q.05_peak_71236	chr3	101448505	101450039
h3k4me1.q.05_peak_72569	chr3	128796115	128799041
h3k4me1.q.05_peak_109720	chr9	41740213	41741379
h3k4me1.q.05_peak_22655	chr12	34154953	34157069
h3k4me1.q.05_peak_39536	chr15	60845118	60847162
h3k4me1.q.05_peak_116400	chrX	142778449	142779081
h3k4me1.q.05_peak_109531	chr9	37247326	37250466
h3k4me1.q.05_peak_63240	chr2	108935616	108937391
h3k4me1.q.05_peak_53311	chr18	59381441	59383570
h3k4me1.q.05_peak_40518	chr15	80517666	80518686
h3k4me1.q.05_peak_99356	chr7	96717755	96721468
h3k4me1.q.05_peak_27600	chr13	26195032	26196573
h3k4me1.q.05_peak_115894	chrX	102080620	102083602
h3k4me1.q.05_peak_44352	chr16	50306698	50310981
h3k4me1.q.05_peak_93327	chr6	98220691	98221100
h3k4me1.q.05_peak_16412	chr11	36591657	36594648
h3k4me1.q.05_peak_21788	chr12	13009942	13012118
h3k4me1.q.05_peak_17289	chr11	57029950	57031297
h3k4me1.q.05_peak_6320	chr1	156863833	156864397
h3k4me1.q.05_peak_18921	chr11	87318404	87320565
h3k4me1.q.05_peak_24768	chr12	82412127	82413002
h3k4me1.q.05_peak_72811	chr3	133515784	133517924
h3k4me1.q.05_peak_11424	chr10	67114331	67117375
h3k4me1.q.05_peak_59695	chr2	36171415	36172424
h3k4me1.q.05_peak_52406	chr18	42779984	42782815
h3k4me1.q.05_peak_80993	chr4	142409254	142413756
h3k4me1.q.05_peak_9001	chr10	13303069	13306998
h3k4me1.q.05_peak_61968	chr2	77931560	77932236
h3k4me1.q.05_peak_60525	chr2	52943075	52947838
h3k4me1.q.05_peak_15390	chr11	18915665	18920184
h3k4me1.q.05_peak_88605	chr5	142433223	142434440
h3k4me1.q.05_peak_7576	chr1	178854807	178858270
h3k4me1.q.05_peak_100304	chr7	115749636	115755925
h3k4me1.q.05_peak_29277	chr13	56214331	56217271
h3k4me1.q.05_peak_37081	chr14	119789123	119790006
h3k4me1.q.05_peak_23819	chr12	61306981	61309292
h3k4me1.q.05_peak_10086	chr10	39256567	39257978
h3k4me1.q.05_peak_116933	chrX	166802976	166809160
h3k4me1.q.05_peak_60454	chr2	52176303	52177885
h3k4me1.q.05_peak_102927	chr8	26243653	26245400
h3k4me1.q.05_peak_12339	chr10	83604654	83605008
h3k4me1.q.05_peak_53874	chr18	69419939	69421228
h3k4me1.q.05_peak_84648	chr5	72147313	72150202
h3k4me1.q.05_peak_99118	chr7	92580472	92581489
h3k4me1.q.05_peak_97824	chr7	66137716	66142623
h3k4me1.q.05_peak_5096	chr1	131768273	131771931
h3k4me1.q.05_peak_101891	chr7	144684167	144685772
h3k4me1.q.05_peak_70041	chr3	75141547	75142694
h3k4me1.q.05_peak_11670	chr10	71051800	71053459
h3k4me1.q.05_peak_114394	chrX	11481463	11483237
[truncated: 24,091 more rows]

## Sheet: E14_All_Poised_Enhancer
PeakID	Chr	Start	End
h3k4me1.q.05_peak_29570	chr13	60608510	60609192
h3k4me1.q.05_peak_51149	chr18	14676866	14678109
h3k4me1.q.05_peak_16404	chr11	36550840	36551358
h3k4me1.q.05_peak_89211	chr6	5828791	5829942
h3k4me1.q.05_peak_72656	chr3	130309979	130311930
h3k4me1.q.05_peak_35336	chr14	76195475	76197148
h3k4me1.q.05_peak_28591	chr13	45609502	45610272
h3k4me1.q.05_peak_101757	chr7	142334905	142335216
h3k4me1.q.05_peak_94867	chr6	127493189	127493908
h3k4me1.q.05_peak_56732	chr19	42268345	42268557
h3k4me1.q.05_peak_31056	chr13	98476696	98477006
h3k4me1.q.05_peak_4407	chr1	110605803	110607478
h3k4me1.q.05_peak_11206	chr10	61614298	61615271
h3k4me1.q.05_peak_48269	chr17	43276758	43278475
h3k4me1.q.05_peak_25954	chr12	105003106	105003432
h3k4me1.q.05_peak_100224	chr7	114835741	114836112
h3k4me1.q.05_peak_82097	chr5	13318587	13320734
h3k4me1.q.05_peak_45673	chr16	81997982	81998180
h3k4me1.q.05_peak_75219	chr4	31337425	31338463
h3k4me1.q.05_peak_39027	chr15	50925793	50926686
h3k4me1.q.05_peak_30199	chr13	80519717	80520199
h3k4me1.q.05_peak_81211	chr4	149060373	149061623
h3k4me1.q.05_peak_6626	chr1	162019911	162022200
h3k4me1.q.05_peak_98958	chr7	89432730	89434529
h3k4me1.q.05_peak_109826	chr9	42870648	42871004
h3k4me1.q.05_peak_82345	chr5	19937870	19938442
h3k4me1.q.05_peak_80634	chr4	138000438	138000953
h3k4me1.q.05_peak_60359	chr2	50445643	50446815
h3k4me1.q.05_peak_35395	chr14	76778464	76778996
h3k4me1.q.05_peak_46106	chr16	91230859	91233770
h3k4me1.q.05_peak_99225	chr7	95479907	95480873
h3k4me1.q.05_peak_36145	chr14	97435420	97436479
h3k4me1.q.05_peak_65006	chr2	143306178	143306890
h3k4me1.q.05_peak_93284	chr6	97603509	97604115
h3k4me1.q.05_peak_39814	chr15	67019182	67019521
h3k4me1.q.05_peak_7967	chr1	185464557	185467339
h3k4me1.q.05_peak_42576	chr16	18197908	18199428
h3k4me1.q.05_peak_11394	chr10	66898259	66898781
h3k4me1.q.05_peak_104004	chr8	47737221	47737532
h3k4me1.q.05_peak_81895	chr5	5205271	5206152
h3k4me1.q.05_peak_52515	chr18	44501554	44502047
h3k4me1.q.05_peak_97445	chr7	54842035	54843126
h3k4me1.q.05_peak_88171	chr5	135191122	135192069
h3k4me1.q.05_peak_6941	chr1	167692817	167693108
h3k4me1.q.05_peak_59184	chr2	29402162	29404130
h3k4me1.q.05_peak_73683	chr3	149021354	149021995
h3k4me1.q.05_peak_71875	chr3	115760811	115761409
h3k4me1.q.05_peak_22835	chr12	38385292	38387536
h3k4me1.q.05_peak_49357	chr17	66755412	66755900
h3k4me1.q.05_peak_45016	chr16	67210895	67211678
h3k4me1.q.05_peak_45934	chr16	88657460	88658049
h3k4me1.q.05_peak_72699	chr3	130956136	130956703
h3k4me1.q.05_peak_14350	chr10	121059180	121063268
h3k4me1.q.05_peak_83858	chr5	52368570	52369914
h3k4me1.q.05_peak_98945	chr7	89214432	89214638
h3k4me1.q.05_peak_65846	chr2	158998125	158998406
h3k4me1.q.05_peak_79877	chr4	128227690	128228514
h3k4me1.q.05_peak_72318	chr3	123348479	123348688
h3k4me1.q.05_peak_61172	chr2	64823745	64824537
h3k4me1.q.05_peak_9578	chr10	24702256	24704022
h3k4me1.q.05_peak_110817	chr9	58467315	58468015
h3k4me1.q.05_peak_100710	chr7	123910141	123910693
h3k4me1.q.05_peak_54474	chr18	79092956	79093787
h3k4me1.q.05_peak_4992	chr1	129661751	129662031
h3k4me1.q.05_peak_53091	chr18	55683631	55685159
h3k4me1.q.05_peak_48622	chr17	49399748	49400255
h3k4me1.q.05_peak_23914	chr12	67467501	67468964
h3k4me1.q.05_peak_107069	chr8	114115182	114116800
h3k4me1.q.05_peak_25307	chr12	91892205	91894001
h3k4me1.q.05_peak_26069	chr12	106453593	106453799
h3k4me1.q.05_peak_20626	chr11	113969889	113973372
h3k4me1.q.05_peak_49117	chr17	63184739	63186384
h3k4me1.q.05_peak_49412	chr17	67557333	67557782
h3k4me1.q.05_peak_81698	chr4	155118250	155118616
h3k4me1.q.05_peak_17602	chr11	63463278	63464527
h3k4me1.q.05_peak_95337	chr6	139751035	139752012
h3k4me1.q.05_peak_15324	chr11	17358599	17361051
h3k4me1.q.05_peak_107526	chr8	121128612	121129362
h3k4me1.q.05_peak_72186	chr3	121370568	121372134
h3k4me1.q.05_peak_48765	chr17	51744000	51744305
h3k4me1.q.05_peak_16423	chr11	36657273	36660294
h3k4me1.q.05_peak_113338	chr9	107426789	107427041
h3k4me1.q.05_peak_4516	chr1	119001204	119002296
h3k4me1.q.05_peak_21559	chr12	7962216	7963412
h3k4me1.q.05_peak_36884	chr14	117228210	117229551
h3k4me1.q.05_peak_2465	chr1	64884742	64885787
h3k4me1.q.05_peak_14613	chr10	126379485	126379924
h3k4me1.q.05_peak_113563	chr9	111755500	111755699
h3k4me1.q.05_peak_42610	chr16	18561167	18561812
h3k4me1.q.05_peak_13430	chr10	104680881	104681682
h3k4me1.q.05_peak_105232	chr8	78696208	78697413
h3k4me1.q.05_peak_35918	chr14	89324397	89325993
h3k4me1.q.05_peak_82434	chr5	21439379	21439916
h3k4me1.q.05_peak_105325	chr8	80838333	80838533
h3k4me1.q.05_peak_27022	chr13	13656158	13656776
h3k4me1.q.05_peak_114357	chrX	10557703	10558727
h3k4me1.q.05_peak_90812	chr6	40152033	40152589
h3k4me1.q.05_peak_43026	chr16	26989350	26990500
h3k4me1.q.05_peak_61489	chr2	70988819	70990738
h3k4me1.q.05_peak_102656	chr8	18348684	18349149
h3k4me1.q.05_peak_79586	chr4	124075675	124076726
h3k4me1.q.05_peak_12811	chr10	92643718	92644561
h3k4me1.q.05_peak_2503	chr1	66181759	66182339
h3k4me1.q.05_peak_1481	chr1	43458650	43460306
h3k4me1.q.05_peak_41481	chr15	95424987	95425455
h3k4me1.q.05_peak_36991	chr14	118387646	118388612
h3k4me1.q.05_peak_99143	chr7	92978860	92979124
h3k4me1.q.05_peak_76225	chr4	53150472	53151210
h3k4me1.q.05_peak_100624	chr7	121398578	121398938
h3k4me1.q.05_peak_16111	chr11	33122894	33123318
h3k4me1.q.05_peak_108536	chr9	16356352	16357825
h3k4me1.q.05_peak_49191	chr17	64214504	64214802
h3k4me1.q.05_peak_80166	chr4	131538025	131538792
h3k4me1.q.05_peak_115712	chrX	96124736	96125443
h3k4me1.q.05_peak_78866	chr4	107249175	107250112
h3k4me1.q.05_peak_3044	chr1	76053238	76054135
h3k4me1.q.05_peak_38331	chr15	32156271	32157294
h3k4me1.q.05_peak_6313	chr1	156787380	156787876
h3k4me1.q.05_peak_36554	chr14	104901590	104903235
h3k4me1.q.05_peak_62512	chr2	93163093	93163991
h3k4me1.q.05_peak_43871	chr16	41066512	41066720
h3k4me1.q.05_peak_97992	chr7	68675477	68675829
h3k4me1.q.05_peak_15446	chr11	19701270	19702371
h3k4me1.q.05_peak_98390	chr7	75924250	75924632
h3k4me1.q.05_peak_64877	chr2	141372780	141373024
h3k4me1.q.05_peak_31757	chr13	110626788	110628849
h3k4me1.q.05_peak_107066	chr8	113995697	113996565
h3k4me1.q.05_peak_26800	chr13	6153559	6153955
h3k4me1.q.05_peak_114665	chrX	22961091	22961688
h3k4me1.q.05_peak_30798	chr13	94560254	94566234
h3k4me1.q.05_peak_43269	chr16	31388289	31388776
h3k4me1.q.05_peak_92881	chr6	91267919	91269129
h3k4me1.q.05_peak_40128	chr15	74203672	74205450
h3k4me1.q.05_peak_922	chr1	33676957	33677248
h3k4me1.q.05_peak_15974	chr11	31753857	31754753
h3k4me1.q.05_peak_5842	chr1	148699820	148700895
h3k4me1.q.05_peak_76530	chr4	58326961	58327331
h3k4me1.q.05_peak_110175	chr9	47561779	47562123
h3k4me1.q.05_peak_49261	chr17	65113729	65115051
h3k4me1.q.05_peak_74824	chr4	20125155	20125609
h3k4me1.q.05_peak_21089	chr11	118861777	118862513
h3k4me1.q.05_peak_30847	chr13	95417880	95418155
h3k4me1.q.05_peak_23062	chr12	43772631	43774456
h3k4me1.q.05_peak_37694	chr15	13193363	13193813
h3k4me1.q.05_peak_48295	chr17	43752211	43753245
h3k4me1.q.05_peak_75151	chr4	28884433	28885490
h3k4me1.q.05_peak_60701	chr2	57492946	57493710
h3k4me1.q.05_peak_56088	chr19	27978224	27978602
h3k4me1.q.05_peak_50182	chr17	83559261	83559692
h3k4me1.q.05_peak_44773	chr16	62490588	62491680
h3k4me1.q.05_peak_39365	chr15	58003764	58005853
h3k4me1.q.05_peak_106286	chr8	97388927	97390342
h3k4me1.q.05_peak_97193	chr7	47019927	47020185
h3k4me1.q.05_peak_64445	chr2	132922212	132922541
h3k4me1.q.05_peak_111535	chr9	68975836	68978950
h3k4me1.q.05_peak_21506	chr12	6445352	6445752
h3k4me1.q.05_peak_20451	chr11	112620419	112621562
h3k4me1.q.05_peak_108333	chr9	13538049	13539846
h3k4me1.q.05_peak_30229	chr13	81075539	81076056
h3k4me1.q.05_peak_49497	chr17	69421827	69422080
h3k4me1.q.05_peak_105174	chr8	77755552	77755960
h3k4me1.q.05_peak_25209	chr12	90217461	90217784
h3k4me1.q.05_peak_65412	chr2	152654427	152654757
h3k4me1.q.05_peak_26872	chr13	8829599	8831327
h3k4me1.q.05_peak_8476	chr1	194434868	194435705
h3k4me1.q.05_peak_97684	chr7	64354284	64354839
h3k4me1.q.05_peak_11597	chr10	69791681	69793262
h3k4me1.q.05_peak_24267	chr12	73370561	73371586
h3k4me1.q.05_peak_100533	chr7	118895332	118896493
h3k4me1.q.05_peak_46346	chr16	94581641	94581857
h3k4me1.q.05_peak_66655	chr2	170803714	170803929
h3k4me1.q.05_peak_25915	chr12	104650110	104651297
h3k4me1.q.05_peak_14677	chr10	127183789	127185032
h3k4me1.q.05_peak_93910	chr6	107641548	107642103
h3k4me1.q.05_peak_4785	chr1	126518399	126518760
h3k4me1.q.05_peak_55923	chr19	24873611	24874247
h3k4me1.q.05_peak_93598	chr6	100924957	100925397
h3k4me1.q.05_peak_108274	chr9	10811112	10812043
h3k4me1.q.05_peak_39225	chr15	55146681	55147674
h3k4me1.q.05_peak_37256	chr14	122435913	122436182
h3k4me1.q.05_peak_31747	chr13	110489965	110490799
h3k4me1.q.05_peak_88528	chr5	141137422	141138212
h3k4me1.q.05_peak_100739	chr7	124786701	124787180
h3k4me1.q.05_peak_87948	chr5	132236291	132237310
h3k4me1.q.05_peak_108328	chr9	13512809	13513258
h3k4me1.q.05_peak_3939	chr1	92752284	92752559
h3k4me1.q.05_peak_72476	chr3	127367758	127368417
h3k4me1.q.05_peak_8055	chr1	186880448	186880814
h3k4me1.q.05_peak_41006	chr15	86925284	86925603
h3k4me1.q.05_peak_65150	chr2	146273814	146274017
h3k4me1.q.05_peak_93509	chr6	100110999	100111524
h3k4me1.q.05_peak_115160	chrX	58234365	58234843
h3k4me1.q.05_peak_74747	chr4	15467930	15468660
h3k4me1.q.05_peak_59619	chr2	35215011	35215845
h3k4me1.q.05_peak_69528	chr3	60883730	60884650
h3k4me1.q.05_peak_15156	chr11	11029162	11029383
h3k4me1.q.05_peak_31394	chr13	104585056	104585411
h3k4me1.q.05_peak_2015	chr1	57852039	57854522
h3k4me1.q.05_peak_97896	chr7	67613308	67614763
h3k4me1.q.05_peak_51413	chr18	22481800	22482805
h3k4me1.q.05_peak_53632	chr18	65086479	65087125
h3k4me1.q.05_peak_109440	chr9	35304009	35304345
h3k4me1.q.05_peak_5196	chr1	132844023	132845036
h3k4me1.q.05_peak_64393	chr2	132159257	132159576
h3k4me1.q.05_peak_5782	chr1	144306491	144307295
h3k4me1.q.05_peak_39999	chr15	72666286	72666783
h3k4me1.q.05_peak_62966	chr2	103643373	103644846
h3k4me1.q.05_peak_83769	chr5	50738032	50739427
h3k4me1.q.05_peak_104145	chr8	49398154	49398725
h3k4me1.q.05_peak_68870	chr3	47865778	47865994
h3k4me1.q.05_peak_18679	chr11	82695424	82696307
h3k4me1.q.05_peak_7384	chr1	175996192	175997649
h3k4me1.q.05_peak_24911	chr12	84709873	84710445
h3k4me1.q.05_peak_13085	chr10	96153132	96154177
h3k4me1.q.05_peak_23490	chr12	53457566	53457775
h3k4me1.q.05_peak_17253	chr11	56020804	56021746
h3k4me1.q.05_peak_88739	chr5	144922721	144923317
h3k4me1.q.05_peak_6297	chr1	156470626	156470849
h3k4me1.q.05_peak_7530	chr1	178328376	178328720
h3k4me1.q.05_peak_15868	chr11	26992502	26992955
h3k4me1.q.05_peak_84571	chr5	69467495	69468527
h3k4me1.q.05_peak_57119	chr19	48046512	48046859
h3k4me1.q.05_peak_52536	chr18	44614444	44614953
h3k4me1.q.05_peak_21859	chr12	14923182	14926417
h3k4me1.q.05_peak_45642	chr16	80730114	80731333
h3k4me1.q.05_peak_48350	chr17	45058469	45059276
h3k4me1.q.05_peak_30873	chr13	95772883	95773657
h3k4me1.q.05_peak_26274	chr12	109409012	109410340
h3k4me1.q.05_peak_45975	chr16	89827772	89828137
h3k4me1.q.05_peak_31836	chr13	111990396	111991672
h3k4me1.q.05_peak_53732	chr18	67120055	67121962
h3k4me1.q.05_peak_99014	chr7	90144020	90144236
h3k4me1.q.05_peak_22664	chr12	34231829	34232272
h3k4me1.q.05_peak_74290	chr4	6678641	6679892
h3k4me1.q.05_peak_89363	chr6	8486511	8488000
h3k4me1.q.05_peak_78507	chr4	102351605	102352425
h3k4me1.q.05_peak_49666	chr17	72510784	72511112
h3k4me1.q.05_peak_385	chr1	16483622	16483957
h3k4me1.q.05_peak_64583	chr2	135689100	135690140
h3k4me1.q.05_peak_99413	chr7	97257607	97258322
h3k4me1.q.05_peak_67375	chr3	8708659	8709827
h3k4me1.q.05_peak_16601	chr11	40609069	40609688
h3k4me1.q.05_peak_36939	chr14	117792089	117792313
h3k4me1.q.05_peak_108074	chr8	128064128	128066723
h3k4me1.q.05_peak_98128	chr7	71560080	71560645
h3k4me1.q.05_peak_90315	chr6	31356589	31357816
h3k4me1.q.05_peak_88778	chr5	146608377	146609253
h3k4me1.q.05_peak_20727	chr11	115107187	115108310
h3k4me1.q.05_peak_37717	chr15	13585768	13586272
h3k4me1.q.05_peak_14438	chr10	122574951	122575883
h3k4me1.q.05_peak_86433	chr5	110874988	110875316
h3k4me1.q.05_peak_68694	chr3	40186871	40187487
h3k4me1.q.05_peak_86896	chr5	115849597	115849916
h3k4me1.q.05_peak_10031	chr10	37481978	37484605
h3k4me1.q.05_peak_76392	chr4	55561401	55563797
h3k4me1.q.05_peak_67444	chr3	9546695	9548531
h3k4me1.q.05_peak_84478	chr5	67096635	67097149
h3k4me1.q.05_peak_81558	chr4	153271224	153272389
h3k4me1.q.05_peak_110176	chr9	47564337	47564656
h3k4me1.q.05_peak_36065	chr14	93879643	93880694
h3k4me1.q.05_peak_14042	chr10	116382614	116383589
h3k4me1.q.05_peak_99849	chr7	107400432	107400767
h3k4me1.q.05_peak_34068	chr14	54187160	54187800
h3k4me1.q.05_peak_116474	chrX	144396303	144397398
h3k4me1.q.05_peak_87967	chr5	132325750	132326632
h3k4me1.q.05_peak_55437	chr19	15052246	15057171
h3k4me1.q.05_peak_78705	chr4	104696920	104697703
h3k4me1.q.05_peak_11287	chr10	63695034	63695929
h3k4me1.q.05_peak_41023	chr15	87550503	87552373
h3k4me1.q.05_peak_6677	chr1	162664957	162665929
h3k4me1.q.05_peak_102000	chr8	5011912	5012736
h3k4me1.q.05_peak_98793	chr7	82904593	82905908
h3k4me1.q.05_peak_114960	chrX	51398109	51398355
h3k4me1.q.05_peak_55582	chr19	17593859	17594228
h3k4me1.q.05_peak_25440	chr12	95744402	95744796
h3k4me1.q.05_peak_100827	chr7	126058541	126059729
h3k4me1.q.05_peak_5638	chr1	138874671	138874895
h3k4me1.q.05_peak_84266	chr5	64451876	64452371
h3k4me1.q.05_peak_59889	chr2	40822353	40822961
h3k4me1.q.05_peak_29781	chr13	69955640	69955891
h3k4me1.q.05_peak_76852	chr4	65991461	65992080
h3k4me1.q.05_peak_73060	chr3	138146800	138147109
h3k4me1.q.05_peak_69256	chr3	54375141	54375498
h3k4me1.q.05_peak_13676	chr10	109598573	109599004
h3k4me1.q.05_peak_65893	chr2	160334379	160335698
h3k4me1.q.05_peak_82690	chr5	25735630	25736813
h3k4me1.q.05_peak_68935	chr3	50139484	50140183
h3k4me1.q.05_peak_13216	chr10	98418430	98419255
h3k4me1.q.05_peak_97380	chr7	51793819	51794351
h3k4me1.q.05_peak_30327	chr13	83571842	83572870
h3k4me1.q.05_peak_11512	chr10	68353740	68354260
h3k4me1.q.05_peak_25449	chr12	95874161	95875342
h3k4me1.q.05_peak_40860	chr15	85295893	85296523
h3k4me1.q.05_peak_50875	chr18	8711129	8711719
h3k4me1.q.05_peak_73696	chr3	149169864	149170417
h3k4me1.q.05_peak_10694	chr10	51282272	51285861
h3k4me1.q.05_peak_77667	chr4	85831762	85831958
h3k4me1.q.05_peak_86208	chr5	105799754	105801038
h3k4me1.q.05_peak_26521	chr12	112794005	112794556
h3k4me1.q.05_peak_111989	chr9	79275601	79276036
h3k4me1.q.05_peak_55894	chr19	24360669	24363255
h3k4me1.q.05_peak_100771	chr7	125250563	125251697
h3k4me1.q.05_peak_41343	chr15	93566808	93567124
h3k4me1.q.05_peak_83421	chr5	42396421	42397418
h3k4me1.q.05_peak_89433	chr6	11593229	11595236
h3k4me1.q.05_peak_72077	chr3	119447365	119448205
h3k4me1.q.05_peak_27058	chr13	15440266	15441093
h3k4me1.q.05_peak_38145	chr15	28398386	28400023
h3k4me1.q.05_peak_64245	chr2	129682279	129682584
h3k4me1.q.05_peak_80842	chr4	140491493	140492314
h3k4me1.q.05_peak_87298	chr5	121918935	121920323
h3k4me1.q.05_peak_86548	chr5	111829604	111830551
h3k4me1.q.05_peak_70477	chr3	84403286	84403849
h3k4me1.q.05_peak_42110	chr16	6135020	6135355
h3k4me1.q.05_peak_74702	chr4	14543951	14544473
h3k4me1.q.05_peak_35190	chr14	73837786	73838131
h3k4me1.q.05_peak_39508	chr15	60225382	60225766
h3k4me1.q.05_peak_38957	chr15	47990871	47991458
h3k4me1.q.05_peak_61022	chr2	62285595	62285856
h3k4me1.q.05_peak_60371	chr2	50701098	50701701
h3k4me1.q.05_peak_74663	chr4	13790332	13790596
h3k4me1.q.05_peak_69163	chr3	52815614	52816089
h3k4me1.q.05_peak_22663	chr12	34219551	34221580
h3k4me1.q.05_peak_28220	chr13	40135380	40136397
h3k4me1.q.05_peak_40797	chr15	84519542	84520721
h3k4me1.q.05_peak_68655	chr3	39712787	39713332
h3k4me1.q.05_peak_71222	chr3	101354608	101355153
h3k4me1.q.05_peak_86586	chr5	112053002	112053454
h3k4me1.q.05_peak_30360	chr13	83978900	83980219
h3k4me1.q.05_peak_42025	chr16	4519049	4519654
h3k4me1.q.05_peak_62498	chr2	93082730	93083552
h3k4me1.q.05_peak_102851	chr8	25040162	25040673
h3k4me1.q.05_peak_95751	chr6	146270438	146270773
h3k4me1.q.05_peak_68392	chr3	34861266	34861878
h3k4me1.q.05_peak_7083	chr1	169455395	169455601
h3k4me1.q.05_peak_76476	chr4	57174719	57175649
h3k4me1.q.05_peak_84826	chr5	74716519	74716789
h3k4me1.q.05_peak_69018	chr3	51236745	51237107
h3k4me1.q.05_peak_49776	chr17	74873858	74874173
h3k4me1.q.05_peak_1884	chr1	55587721	55588631
h3k4me1.q.05_peak_79092	chr4	111670103	111672013
h3k4me1.q.05_peak_43700	chr16	38116916	38117300
h3k4me1.q.05_peak_108941	chr9	27185521	27186336
h3k4me1.q.05_peak_22669	chr12	34481532	34481976
h3k4me1.q.05_peak_68468	chr3	36406232	36406825
h3k4me1.q.05_peak_41052	chr15	87879028	87879718
h3k4me1.q.05_peak_16332	chr11	36058461	36059859
h3k4me1.q.05_peak_42869	chr16	24501941	24502430
h3k4me1.q.05_peak_32660	chr14	18324816	18325155
h3k4me1.q.05_peak_107477	chr8	120428305	120428539
h3k4me1.q.05_peak_86033	chr5	102366832	102367129
h3k4me1.q.05_peak_68184	chr3	30187839	30188688
h3k4me1.q.05_peak_619	chr1	23463822	23464470
h3k4me1.q.05_peak_72708	chr3	131072224	131073831
h3k4me1.q.05_peak_4671	chr1	122242936	122243894
h3k4me1.q.05_peak_49872	chr17	78221398	78221752
h3k4me1.q.05_peak_85477	chr5	91652113	91654585
h3k4me1.q.05_peak_1279	chr1	39598534	39599410
h3k4me1.q.05_peak_2098	chr1	59458562	59459565
h3k4me1.q.05_peak_62696	chr2	97430237	97430604
h3k4me1.q.05_peak_36415	chr14	102153561	102153998
h3k4me1.q.05_peak_36362	chr14	101304569	101305403
h3k4me1.q.05_peak_110085	chr9	46352189	46354190
h3k4me1.q.05_peak_44401	chr16	50941810	50942026
h3k4me1.q.05_peak_85814	chr5	99230342	99231485
h3k4me1.q.05_peak_60158	chr2	46394106	46394594
h3k4me1.q.05_peak_75235	chr4	31489080	31490076
h3k4me1.q.05_peak_105213	chr8	78353223	78354985
h3k4me1.q.05_peak_101838	chr7	143746023	143746968
h3k4me1.q.05_peak_61315	chr2	67671344	67672456
h3k4me1.q.05_peak_33855	chr14	47884984	47885581
h3k4me1.q.05_peak_74031	chr3	156231810	156232039
h3k4me1.q.05_peak_23013	chr12	41601080	41602298
h3k4me1.q.05_peak_74646	chr4	13689908	13690425
h3k4me1.q.05_peak_77037	chr4	72187903	72188843
h3k4me1.q.05_peak_80953	chr4	142060692	142061098
h3k4me1.q.05_peak_93269	chr6	97520799	97523872
h3k4me1.q.05_peak_35736	chr14	84687590	84687784
h3k4me1.q.05_peak_109929	chr9	43943168	43944603
h3k4me1.q.05_peak_78436	chr4	100836389	100837622
h3k4me1.q.05_peak_37220	chr14	122179346	122179765
h3k4me1.q.05_peak_50143	chr17	83136407	83136623
h3k4me1.q.05_peak_50954	chr18	11047965	11048747
h3k4me1.q.05_peak_88202	chr5	135851283	135851988
h3k4me1.q.05_peak_1889	chr1	55650717	55652394
h3k4me1.q.05_peak_42053	chr16	4785765	4786558
h3k4me1.q.05_peak_74572	chr4	12461118	12462392
h3k4me1.q.05_peak_80022	chr4	130035787	130037482
h3k4me1.q.05_peak_20019	chr11	104619241	104620241
h3k4me1.q.05_peak_60179	chr2	47991065	47992126
h3k4me1.q.05_peak_27107	chr13	15697952	15698201
h3k4me1.q.05_peak_27016	chr13	13576555	13577223
h3k4me1.q.05_peak_43147	chr16	29915153	29915730
h3k4me1.q.05_peak_44094	chr16	44562088	44563186
h3k4me1.q.05_peak_55412	chr19	14656153	14657677
h3k4me1.q.05_peak_55550	chr19	16825047	16826028
h3k4me1.q.05_peak_41817	chr15	101006582	101006808
h3k4me1.q.05_peak_61756	chr2	74297582	74298149
h3k4me1.q.05_peak_99076	chr7	91806391	91807206
h3k4me1.q.05_peak_87634	chr5	127086104	127087217
h3k4me1.q.05_peak_3699	chr1	89235240	89236357
h3k4me1.q.05_peak_26142	chr12	107723808	107724058
h3k4me1.q.05_peak_19897	chr11	102772633	102772856
h3k4me1.q.05_peak_71125	chr3	98416794	98417986
h3k4me1.q.05_peak_23115	chr12	44533278	44533485
h3k4me1.q.05_peak_1596	chr1	48342849	48343330
h3k4me1.q.05_peak_102076	chr8	7958830	7959154
h3k4me1.q.05_peak_33222	chr14	28088512	28088710
h3k4me1.q.05_peak_49755	chr17	74261872	74262230
h3k4me1.q.05_peak_39250	chr15	55492579	55493794
h3k4me1.q.05_peak_19092	chr11	88758205	88760085
h3k4me1.q.05_peak_105413	chr8	82972985	82973915
h3k4me1.q.05_peak_104652	chr8	64336030	64336676
h3k4me1.q.05_peak_60702	chr2	57494888	57496493
h3k4me1.q.05_peak_66730	chr2	171855832	171857351
h3k4me1.q.05_peak_111665	chr9	71953286	71953502
h3k4me1.q.05_peak_106804	chr8	108911322	108911677
h3k4me1.q.05_peak_23500	chr12	53559331	53559708
h3k4me1.q.05_peak_31967	chr13	114048075	114048864
h3k4me1.q.05_peak_15290	chr11	16525150	16525540
h3k4me1.q.05_peak_16439	chr11	36823334	36825277
h3k4me1.q.05_peak_75430	chr4	33716583	33717155
h3k4me1.q.05_peak_54846	chr18	88246276	88247501
h3k4me1.q.05_peak_78748	chr4	105291729	105292065
h3k4me1.q.05_peak_106138	chr8	94571723	94572076
h3k4me1.q.05_peak_66249	chr2	166024489	166025355
h3k4me1.q.05_peak_93703	chr6	102375437	102375739
h3k4me1.q.05_peak_38727	chr15	40066703	40067522
h3k4me1.q.05_peak_85041	chr5	78284376	78284570
h3k4me1.q.05_peak_89261	chr6	6544063	6544683
h3k4me1.q.05_peak_54916	chr19	3855121	3856684
h3k4me1.q.05_peak_89119	chr6	4528038	4529193
h3k4me1.q.05_peak_58941	chr2	26193661	26198755
h3k4me1.q.05_peak_100223	chr7	114834413	114834677
h3k4me1.q.05_peak_81702	chr4	155133387	155136447
h3k4me1.q.05_peak_104104	chr8	48700307	48700501
h3k4me1.q.05_peak_32006	chr13	114629443	114629748
h3k4me1.q.05_peak_77178	chr4	76452451	76452671
h3k4me1.q.05_peak_2673	chr1	70200195	70200755
h3k4me1.q.05_peak_21392	chr12	4507085	4508293
h3k4me1.q.05_peak_23457	chr12	53179902	53180343
h3k4me1.q.05_peak_115525	chrX	82548689	82549225
h3k4me1.q.05_peak_113153	chr9	103690809	103691236
h3k4me1.q.05_peak_35597	chr14	79839876	79840166
h3k4me1.q.05_peak_49164	chr17	63811536	63811742
h3k4me1.q.05_peak_23831	chr12	62217936	62218606
h3k4me1.q.05_peak_103305	chr8	33392041	33392270
h3k4me1.q.05_peak_45082	chr16	69991469	69995074
h3k4me1.q.05_peak_2312	chr1	62776341	62776772
h3k4me1.q.05_peak_116919	chrX	166620621	166623943
h3k4me1.q.05_peak_25156	chr12	89109705	89110318
h3k4me1.q.05_peak_16469	chr11	37186136	37186647
h3k4me1.q.05_peak_66671	chr2	170861176	170861444
h3k4me1.q.05_peak_80807	chr4	140215107	140215368
h3k4me1.q.05_peak_77538	chr4	83956798	83957006
h3k4me1.q.05_peak_42932	chr16	25139771	25140556
h3k4me1.q.05_peak_46442	chr16	96721008	96721731
h3k4me1.q.05_peak_73615	chr3	148031616	148034443
h3k4me1.q.05_peak_24864	chr12	84173075	84173360
h3k4me1.q.05_peak_4973	chr1	129304068	129304850
h3k4me1.q.05_peak_89901	chr6	22844972	22846109
h3k4me1.q.05_peak_90069	chr6	27979156	27981284
h3k4me1.q.05_peak_5712	chr1	141596947	141597938
h3k4me1.q.05_peak_40758	chr15	84217822	84219566
h3k4me1.q.05_peak_86533	chr5	111702848	111704642
h3k4me1.q.05_peak_60209	chr2	48608848	48609096
h3k4me1.q.05_peak_61750	chr2	74207059	74210999
h3k4me1.q.05_peak_86634	chr5	112533938	112534351
h3k4me1.q.05_peak_55828	chr19	23631943	23632778
h3k4me1.q.05_peak_91786	chr6	61976196	61978235
h3k4me1.q.05_peak_66900	chr2	174311159	174311661
h3k4me1.q.05_peak_59558	chr2	34216746	34219688
h3k4me1.q.05_peak_83615	chr5	46431609	46432215
h3k4me1.q.05_peak_70381	chr3	83026385	83028464
h3k4me1.q.05_peak_49227	chr17	64626797	64628049
h3k4me1.q.05_peak_27052	chr13	15282905	15283486
h3k4me1.q.05_peak_37853	chr15	21858412	21859277
h3k4me1.q.05_peak_25878	chr12	103232696	103233315
h3k4me1.q.05_peak_33088	chr14	25353953	25354887
h3k4me1.q.05_peak_17738	chr11	66188114	66188814
h3k4me1.q.05_peak_16651	chr11	42314583	42315407
h3k4me1.q.05_peak_36350	chr14	100792203	100792411
h3k4me1.q.05_peak_101266	chr7	133288068	133288836
h3k4me1.q.05_peak_25421	chr12	95500508	95501172
h3k4me1.q.05_peak_92001	chr6	71378345	71378746
h3k4me1.q.05_peak_49827	chr17	75836061	75836572
h3k4me1.q.05_peak_86517	chr5	111619810	111620320
h3k4me1.q.05_peak_108233	chr9	9882755	9883452
h3k4me1.q.05_peak_87326	chr5	122221965	122222528
h3k4me1.q.05_peak_19678	chr11	99147107	99149827
h3k4me1.q.05_peak_70349	chr3	82048624	82049656
h3k4me1.q.05_peak_5266	chr1	133470100	133470861
h3k4me1.q.05_peak_107171	chr8	115302029	115302954
h3k4me1.q.05_peak_7416	chr1	176754003	176754732
h3k4me1.q.05_peak_99629	chr7	100215091	100216197
h3k4me1.q.05_peak_56946	chr19	45673311	45674300
h3k4me1.q.05_peak_37960	chr15	25692495	25692961
h3k4me1.q.05_peak_12030	chr10	78578255	78578624
h3k4me1.q.05_peak_5005	chr1	129907457	129908093
h3k4me1.q.05_peak_69988	chr3	70957428	70957869
h3k4me1.q.05_peak_106683	chr8	106929315	106929927
h3k4me1.q.05_peak_6663	chr1	162453452	162454196
h3k4me1.q.05_peak_64670	chr2	136980442	136982278
h3k4me1.q.05_peak_64676	chr2	137091015	137091339
h3k4me1.q.05_peak_4854	chr1	127352235	127354027
h3k4me1.q.05_peak_96832	chr7	37528006	37528223
h3k4me1.q.05_peak_82387	chr5	20655010	20655506
h3k4me1.q.05_peak_93888	chr6	107380495	107381978
h3k4me1.q.05_peak_72240	chr3	122122114	122122352
h3k4me1.q.05_peak_21741	chr12	12647485	12648116
h3k4me1.q.05_peak_34024	chr14	51997069	51997268
h3k4me1.q.05_peak_23304	chr12	50720419	50722134
h3k4me1.q.05_peak_35733	chr14	84615630	84617021
h3k4me1.q.05_peak_92970	chr6	92816142	92818569
h3k4me1.q.05_peak_101836	chr7	143730231	143731348
h3k4me1.q.05_peak_45861	chr16	87511660	87512255
h3k4me1.q.05_peak_30774	chr13	94185043	94185507
h3k4me1.q.05_peak_30001	chr13	75162658	75164621
h3k4me1.q.05_peak_67409	chr3	9159159	9159634
h3k4me1.q.05_peak_28492	chr13	44353398	44354996
h3k4me1.q.05_peak_96636	chr7	34708774	34709805
h3k4me1.q.05_peak_34842	chr14	67229916	67230584
h3k4me1.q.05_peak_6877	chr1	166838639	166838897
h3k4me1.q.05_peak_54394	chr18	78471026	78471786
h3k4me1.q.05_peak_76797	chr4	65278069	65281098
h3k4me1.q.05_peak_77121	chr4	75753987	75754235
h3k4me1.q.05_peak_48021	chr17	32263668	32264436
h3k4me1.q.05_peak_102654	chr8	18316417	18316945
h3k4me1.q.05_peak_94952	chr6	128121627	128122301
h3k4me1.q.05_peak_67803	chr3	21496827	21497387
h3k4me1.q.05_peak_23279	chr12	50495887	50496668
h3k4me1.q.05_peak_25950	chr12	104960058	104960472
h3k4me1.q.05_peak_103427	chr8	35130348	35131405
h3k4me1.q.05_peak_78898	chr4	107753508	107753765
h3k4me1.q.05_peak_31548	chr13	107850767	107853125
h3k4me1.q.05_peak_63637	chr2	117218090	117218370
h3k4me1.q.05_peak_39564	chr15	61690107	61690902
h3k4me1.q.05_peak_31642	chr13	109315360	109315839
h3k4me1.q.05_peak_97397	chr7	51931229	51931644
h3k4me1.q.05_peak_51025	chr18	12435113	12436513
h3k4me1.q.05_peak_72812	chr3	133533901	133534978
h3k4me1.q.05_peak_26503	chr12	112596618	112596820
h3k4me1.q.05_peak_33262	chr14	29015632	29016394
h3k4me1.q.05_peak_90649	chr6	37170654	37172499
h3k4me1.q.05_peak_20605	chr11	113781003	113781314
h3k4me1.q.05_peak_69068	chr3	51795377	51799798
h3k4me1.q.05_peak_26864	chr13	8633718	8633924
h3k4me1.q.05_peak_99554	chr7	99041794	99042272
h3k4me1.q.05_peak_49370	chr17	66839270	66839927
h3k4me1.q.05_peak_66699	chr2	171314209	171314948
h3k4me1.q.05_peak_28415	chr13	43602263	43603780
h3k4me1.q.05_peak_43019	chr16	26595558	26597642
h3k4me1.q.05_peak_89113	chr6	4468825	4469116
h3k4me1.q.05_peak_8612	chr10	4338922	4339692
h3k4me1.q.05_peak_83718	chr5	49318286	49319152
h3k4me1.q.05_peak_73334	chr3	143614833	143615548
h3k4me1.q.05_peak_93923	chr6	107894768	107895311
h3k4me1.q.05_peak_64701	chr2	137538617	137538859
h3k4me1.q.05_peak_108462	chr9	15515562	15515997
h3k4me1.q.05_peak_64774	chr2	139301033	139301738
h3k4me1.q.05_peak_38577	chr15	37480191	37480485
h3k4me1.q.05_peak_93158	chr6	94811656	94812247
h3k4me1.q.05_peak_105068	chr8	73909996	73910496
h3k4me1.q.05_peak_96850	chr7	37685180	37686132
h3k4me1.q.05_peak_116366	chrX	142086846	142087681
h3k4me1.q.05_peak_58274	chr2	9604845	9605465
h3k4me1.q.05_peak_76432	chr4	56287701	56288925
h3k4me1.q.05_peak_83116	chr5	36279771	36280093
h3k4me1.q.05_peak_114143	chr9	122035467	122036603
h3k4me1.q.05_peak_71445	chr3	105058449	105058967
h3k4me1.q.05_peak_52391	chr18	42720737	42721175
h3k4me1.q.05_peak_63261	chr2	109650100	109650471
h3k4me1.q.05_peak_3452	chr1	83326766	83327224
h3k4me1.q.05_peak_39134	chr15	53135267	53137103
h3k4me1.q.05_peak_114049	chr9	120991176	120991491
h3k4me1.q.05_peak_62193	chr2	83731703	83732081
h3k4me1.q.05_peak_64735	chr2	138436270	138438629
h3k4me1.q.05_peak_90620	chr6	36842914	36845615
h3k4me1.q.05_peak_223	chr1	12805683	12808500
h3k4me1.q.05_peak_101114	chr7	131602049	131603606
h3k4me1.q.05_peak_26430	chr12	111945345	111945663
h3k4me1.q.05_peak_73957	chr3	154191998	154195223
h3k4me1.q.05_peak_58080	chr2	6164617	6165164
h3k4me1.q.05_peak_10000	chr10	37170331	37173022
h3k4me1.q.05_peak_54259	chr18	76037079	76037375
h3k4me1.q.05_peak_76691	chr4	63004051	63005426
h3k4me1.q.05_peak_39032	chr15	50991675	50992498
h3k4me1.q.05_peak_13658	chr10	109078672	109080745
h3k4me1.q.05_peak_114372	chrX	11082270	11082500
h3k4me1.q.05_peak_57067	chr19	47460495	47461017
h3k4me1.q.05_peak_65665	chr2	156870477	156870835
h3k4me1.q.05_peak_95283	chr6	137956379	137957822
h3k4me1.q.05_peak_108236	chr9	9945977	9946319
h3k4me1.q.05_peak_75941	chr4	46259263	46260128
h3k4me1.q.05_peak_78133	chr4	95915917	95916537
h3k4me1.q.05_peak_48816	chr17	54664460	54664711
h3k4me1.q.05_peak_80775	chr4	140004315	140005294
h3k4me1.q.05_peak_82423	chr5	21298295	21299873
h3k4me1.q.05_peak_34162	chr14	55497538	55497763
h3k4me1.q.05_peak_1259	chr1	39281453	39281658
h3k4me1.q.05_peak_9142	chr10	17077400	17077795
h3k4me1.q.05_peak_39687	chr15	64259475	64259798
h3k4me1.q.05_peak_107875	chr8	125644871	125645861
h3k4me1.q.05_peak_53497	chr18	62837535	62838858
h3k4me1.q.05_peak_99049	chr7	91126461	91127128
h3k4me1.q.05_peak_74060	chr3	156772036	156773023
h3k4me1.q.05_peak_74514	chr4	11195904	11196920
h3k4me1.q.05_peak_64956	chr2	142403017	142404863
h3k4me1.q.05_peak_69066	chr3	51778215	51779635
h3k4me1.q.05_peak_69819	chr3	68096185	68097670
h3k4me1.q.05_peak_114106	chr9	121505312	121505844
h3k4me1.q.05_peak_62495	chr2	93040545	93042734
h3k4me1.q.05_peak_94904	chr6	127773012	127773348
h3k4me1.q.05_peak_112451	chr9	91392601	91392837
h3k4me1.q.05_peak_90043	chr6	26828348	26828665
h3k4me1.q.05_peak_4068	chr1	96449520	96450187
h3k4me1.q.05_peak_45185	chr16	72527676	72530208
h3k4me1.q.05_peak_73729	chr3	149405010	149406948
h3k4me1.q.05_peak_13735	chr10	110415623	110416113
h3k4me1.q.05_peak_48581	chr17	48847500	48848473
h3k4me1.q.05_peak_97321	chr7	49908409	49908667
h3k4me1.q.05_peak_49188	chr17	64203183	64203964
h3k4me1.q.05_peak_97739	chr7	64922382	64923076
h3k4me1.q.05_peak_101259	chr7	133189441	133190771
h3k4me1.q.05_peak_98910	chr7	88127820	88128262
h3k4me1.q.05_peak_84822	chr5	74615655	74616327
h3k4me1.q.05_peak_47642	chr17	27712605	27713263
h3k4me1.q.05_peak_39084	chr15	51853913	51855602
h3k4me1.q.05_peak_15435	chr11	19463706	19464185
h3k4me1.q.05_peak_101473	chr7	136595419	136596188
h3k4me1.q.05_peak_17214	chr11	54792036	54792832
h3k4me1.q.05_peak_37712	chr15	13421479	13421752
h3k4me1.q.05_peak_98216	chr7	73385243	73385671
h3k4me1.q.05_peak_9391	chr10	21079356	21079565
h3k4me1.q.05_peak_23772	chr12	58872292	58872956
h3k4me1.q.05_peak_42375	chr16	12216688	12218369
h3k4me1.q.05_peak_20180	chr11	107876352	107876925
h3k4me1.q.05_peak_23923	chr12	67914401	67915041
h3k4me1.q.05_peak_109153	chr9	29919791	29920984
h3k4me1.q.05_peak_73711	chr3	149288257	149288507
h3k4me1.q.05_peak_113475	chr9	109862661	109863040
h3k4me1.q.05_peak_64193	chr2	128391729	128393469
h3k4me1.q.05_peak_92752	chr6	88936816	88943898
h3k4me1.q.05_peak_100882	chr7	126941529	126941884
h3k4me1.q.05_peak_14433	chr10	122418300	122419183
h3k4me1.q.05_peak_50402	chr17	86418205	86418572
h3k4me1.q.05_peak_116917	chrX	166559385	166559701
h3k4me1.q.05_peak_19486	chr11	96767208	96767655
h3k4me1.q.05_peak_7976	chr1	185638522	185638998
h3k4me1.q.05_peak_30823	chr13	94969979	94970522
h3k4me1.q.05_peak_45139	chr16	71520569	71521635
h3k4me1.q.05_peak_45780	chr16	85311455	85312408
h3k4me1.q.05_peak_53988	chr18	71766780	71767051
h3k4me1.q.05_peak_108954	chr9	27286505	27286831
h3k4me1.q.05_peak_85371	chr5	89158501	89159094
h3k4me1.q.05_peak_40475	chr15	79824949	79826247
h3k4me1.q.05_peak_109085	chr9	29169458	29170855
h3k4me1.q.05_peak_82485	chr5	22207959	22209345
h3k4me1.q.05_peak_77439	chr4	82765265	82766361
h3k4me1.q.05_peak_85895	chr5	99845425	99846633
h3k4me1.q.05_peak_7900	chr1	184076379	184077052
h3k4me1.q.05_peak_34353	chr14	59915868	59916546
h3k4me1.q.05_peak_36037	chr14	93555416	93555983
h3k4me1.q.05_peak_21372	chr12	4318998	4319620
h3k4me1.q.05_peak_89000	chr5	149843992	149844433
h3k4me1.q.05_peak_26309	chr12	109897427	109898815
h3k4me1.q.05_peak_65423	chr2	152764166	152765656
h3k4me1.q.05_peak_228	chr1	12851796	12852376
h3k4me1.q.05_peak_8804	chr10	9203246	9203784
h3k4me1.q.05_peak_10213	chr10	40762180	40763568
h3k4me1.q.05_peak_113067	chr9	102737266	102737778
h3k4me1.q.05_peak_18895	chr11	86958303	86958807
h3k4me1.q.05_peak_97743	chr7	64995872	64996454
h3k4me1.q.05_peak_88389	chr5	139398772	139398976
h3k4me1.q.05_peak_76036	chr4	47648730	47649947
h3k4me1.q.05_peak_89519	chr6	14599664	14603183
h3k4me1.q.05_peak_1215	chr1	38561898	38562776
h3k4me1.q.05_peak_61207	chr2	65274353	65277043
h3k4me1.q.05_peak_12969	chr10	94804337	94805215
h3k4me1.q.05_peak_8496	chr1	194631925	194632208
h3k4me1.q.05_peak_365	chr1	16100864	16101241
h3k4me1.q.05_peak_39490	chr15	59642792	59644834
h3k4me1.q.05_peak_36267	chr14	99385299	99385872
h3k4me1.q.05_peak_86152	chr5	104374002	104376115
h3k4me1.q.05_peak_70144	chr3	79141246	79142302
h3k4me1.q.05_peak_59838	chr2	38781769	38783610
h3k4me1.q.05_peak_42144	chr16	6883656	6884708
h3k4me1.q.05_peak_57129	chr19	48237684	48242086
h3k4me1.q.05_peak_69615	chr3	63570743	63571014
h3k4me1.q.05_peak_64778	chr2	139562031	139562479
h3k4me1.q.05_peak_11974	chr10	77464521	77465170
h3k4me1.q.05_peak_81856	chr5	4805173	4805421
h3k4me1.q.05_peak_105862	chr8	90352365	90354523
h3k4me1.q.05_peak_2574	chr1	67273265	67274217
h3k4me1.q.05_peak_26091	chr12	106843809	106844133
h3k4me1.q.05_peak_90096	chr6	28487848	28488437
h3k4me1.q.05_peak_106755	chr8	108387034	108388602
h3k4me1.q.05_peak_43954	chr16	42510835	42511792
h3k4me1.q.05_peak_72918	chr3	136186283	136186717
h3k4me1.q.05_peak_113193	chr9	104614135	104614924
h3k4me1.q.05_peak_70016	chr3	73370637	73371009
h3k4me1.q.05_peak_12912	chr10	94049081	94050093
h3k4me1.q.05_peak_87352	chr5	122909476	122909930
h3k4me1.q.05_peak_49413	chr17	67562917	67563807
h3k4me1.q.05_peak_88921	chr5	148897378	148898291
h3k4me1.q.05_peak_93217	chr6	96354117	96355096
h3k4me1.q.05_peak_64191	chr2	128388128	128389440
h3k4me1.q.05_peak_108829	chr9	24291639	24291864
h3k4me1.q.05_peak_54310	chr18	77043341	77043956
h3k4me1.q.05_peak_57996	chr2	4749262	4749825
h3k4me1.q.05_peak_34987	chr14	70044243	70045731
h3k4me1.q.05_peak_112054	chr9	80600354	80600655
h3k4me1.q.05_peak_6120	chr1	153730493	153731880
h3k4me1.q.05_peak_84066	chr5	57806567	57807991
h3k4me1.q.05_peak_25324	chr12	92198976	92199545
h3k4me1.q.05_peak_54924	chr19	4018742	4019014
h3k4me1.q.05_peak_34453	chr14	61188526	61188945
h3k4me1.q.05_peak_31494	chr13	107308725	107309964
h3k4me1.q.05_peak_12954	chr10	94549732	94550245
h3k4me1.q.05_peak_42129	chr16	6556104	6557186
h3k4me1.q.05_peak_67006	chr2	179080269	179080658
h3k4me1.q.05_peak_9800	chr10	29674025	29674862
h3k4me1.q.05_peak_99631	chr7	100283118	100284011
h3k4me1.q.05_peak_25232	chr12	90932157	90933052
h3k4me1.q.05_peak_71541	chr3	107045477	107045989
h3k4me1.q.05_peak_67330	chr3	7025316	7025957
h3k4me1.q.05_peak_37233	chr14	122296951	122298156
h3k4me1.q.05_peak_15734	chr11	24535093	24535985
h3k4me1.q.05_peak_69713	chr3	65796002	65796449
h3k4me1.q.05_peak_11802	chr10	74359822	74360431
h3k4me1.q.05_peak_30649	chr13	91756123	91756542
h3k4me1.q.05_peak_32582	chr14	15781135	15781419
h3k4me1.q.05_peak_5461	chr1	135793656	135794340
h3k4me1.q.05_peak_89810	chr6	21482249	21483903
h3k4me1.q.05_peak_24593	chr12	79821623	79822416
h3k4me1.q.05_peak_18762	chr11	84389121	84389405
h3k4me1.q.05_peak_116869	chrX	165758310	165758781
h3k4me1.q.05_peak_1869	chr1	55383433	55383643
h3k4me1.q.05_peak_21348	chr12	3843023	3844108
h3k4me1.q.05_peak_13778	chr10	111014216	111014739
h3k4me1.q.05_peak_16483	chr11	37473847	37474662
h3k4me1.q.05_peak_85163	chr5	82997480	82998705
h3k4me1.q.05_peak_100134	chr7	112918330	112919456
h3k4me1.q.05_peak_1538	chr1	44943152	44944618
h3k4me1.q.05_peak_8047	chr1	186765138	186765819
h3k4me1.q.05_peak_63284	chr2	110084250	110085073
h3k4me1.q.05_peak_31289	chr13	102767055	102767531
h3k4me1.q.05_peak_73821	chr3	152121887	152122647
h3k4me1.q.05_peak_31194	chr13	101061476	101063442
h3k4me1.q.05_peak_70623	chr3	86887620	86887843
h3k4me1.q.05_peak_73442	chr3	145331574	145331916
h3k4me1.q.05_peak_88189	chr5	135502666	135503328
h3k4me1.q.05_peak_68393	chr3	34868639	34869631
h3k4me1.q.05_peak_14610	chr10	126296018	126296763
h3k4me1.q.05_peak_13399	chr10	103245364	103245889
h3k4me1.q.05_peak_29923	chr13	72958267	72959964
h3k4me1.q.05_peak_49042	chr17	62412441	62412967
h3k4me1.q.05_peak_109409	chr9	34966958	34968190
h3k4me1.q.05_peak_95643	chr6	144639940	144640181
h3k4me1.q.05_peak_51308	chr18	19847893	19849610
h3k4me1.q.05_peak_94077	chr6	112049939	112051342
h3k4me1.q.05_peak_66360	chr2	167129414	167130640
h3k4me1.q.05_peak_23183	chr12	46416397	46418043
h3k4me1.q.05_peak_90289	chr6	31056703	31057697
h3k4me1.q.05_peak_54578	chr18	81588747	81589461
h3k4me1.q.05_peak_116621	chrX	157729960	157733450
h3k4me1.q.05_peak_5884	chr1	150320956	150321205
h3k4me1.q.05_peak_853	chr1	31452639	31452850
h3k4me1.q.05_peak_99421	chr7	97343170	97343863
h3k4me1.q.05_peak_25211	chr12	90239425	90239718
h3k4me1.q.05_peak_115502	chrX	77545807	77546610
h3k4me1.q.05_peak_20971	chr11	117685505	117686053
h3k4me1.q.05_peak_99597	chr7	99538936	99539353
h3k4me1.q.05_peak_92644	chr6	87299592	87300636
h3k4me1.q.05_peak_50931	chr18	10473415	10473709
h3k4me1.q.05_peak_102436	chr8	12777006	12777365
h3k4me1.q.05_peak_108894	chr9	26090880	26091319
h3k4me1.q.05_peak_12642	chr10	90093641	90094749
h3k4me1.q.05_peak_2800	chr1	72468399	72468613
h3k4me1.q.05_peak_20835	chr11	116572039	116572307
h3k4me1.q.05_peak_44693	chr16	58507299	58508846
h3k4me1.q.05_peak_70316	chr3	81408542	81409857
h3k4me1.q.05_peak_3396	chr1	82345560	82346010
h3k4me1.q.05_peak_74298	chr4	6813031	6813263
h3k4me1.q.05_peak_86028	chr5	102247765	102248137
h3k4me1.q.05_peak_112435	chr9	91140654	91141585
h3k4me1.q.05_peak_76260	chr4	53495959	53496155
h3k4me1.q.05_peak_33585	chr14	35249928	35251476
h3k4me1.q.05_peak_51920	chr18	33949914	33951143
h3k4me1.q.05_peak_38449	chr15	35332293	35332613
h3k4me1.q.05_peak_22691	chr12	34773878	34776483
h3k4me1.q.05_peak_44813	chr16	63138852	63139363
h3k4me1.q.05_peak_30213	chr13	80746139	80746979
h3k4me1.q.05_peak_8417	chr1	193675454	193675725
h3k4me1.q.05_peak_76682	chr4	62872607	62872876
h3k4me1.q.05_peak_62144	chr2	81834316	81834894
h3k4me1.q.05_peak_80653	chr4	138293168	138293943
h3k4me1.q.05_peak_18867	chr11	86395586	86397150
h3k4me1.q.05_peak_63099	chr2	105770056	105770264
h3k4me1.q.05_peak_13980	chr10	115162479	115163671
h3k4me1.q.05_peak_100661	chr7	122421052	122421320
h3k4me1.q.05_peak_61139	chr2	64042272	64043913
h3k4me1.q.05_peak_26696	chr12	118647260	118652934
h3k4me1.q.05_peak_116405	chrX	142959917	142962926
h3k4me1.q.05_peak_36845	chr14	116697440	116699462
h3k4me1.q.05_peak_100294	chr7	115671089	115671846
h3k4me1.q.05_peak_11627	chr10	70269090	70270131
h3k4me1.q.05_peak_41832	chr15	101145406	101146221
h3k4me1.q.05_peak_55774	chr19	22627651	22628069
h3k4me1.q.05_peak_88027	chr5	132707587	132708337
h3k4me1.q.05_peak_60114	chr2	45249921	45251003
h3k4me1.q.05_peak_43510	chr16	34768220	34769078
h3k4me1.q.05_peak_104635	chr8	63097668	63099382
h3k4me1.q.05_peak_55850	chr19	23899583	23901120
h3k4me1.q.05_peak_102824	chr8	24339720	24340100
h3k4me1.q.05_peak_89045	chr5	150935945	150937016
h3k4me1.q.05_peak_97134	chr7	46202628	46202944
h3k4me1.q.05_peak_61477	chr2	70642797	70644063
h3k4me1.q.05_peak_44682	chr16	58134037	58135160
h3k4me1.q.05_peak_44863	chr16	63803068	63803308
h3k4me1.q.05_peak_3266	chr1	79609033	79609489
h3k4me1.q.05_peak_55372	chr19	14289063	14291544
h3k4me1.q.05_peak_25914	chr12	104641963	104642611
h3k4me1.q.05_peak_897	chr1	33271099	33272140
h3k4me1.q.05_peak_13758	chr10	110716903	110717528
h3k4me1.q.05_peak_71263	chr3	101794468	101798930
h3k4me1.q.05_peak_100252	chr7	115220227	115220759
h3k4me1.q.05_peak_2010	chr1	57789786	57790986
h3k4me1.q.05_peak_37291	chr14	122900187	122904536
h3k4me1.q.05_peak_13835	chr10	111665399	111666747
h3k4me1.q.05_peak_275	chr1	13788585	13788917
h3k4me1.q.05_peak_8919	chr10	11870789	11871990
h3k4me1.q.05_peak_93168	chr6	95123291	95124554
h3k4me1.q.05_peak_50248	chr17	84264221	84264995
h3k4me1.q.05_peak_70289	chr3	81017433	81018057
h3k4me1.q.05_peak_100707	chr7	123847298	123848200
h3k4me1.q.05_peak_9582	chr10	24737010	24739435
h3k4me1.q.05_peak_43078	chr16	28876535	28877957
h3k4me1.q.05_peak_6824	chr1	165926953	165928079
h3k4me1.q.05_peak_10796	chr10	53334934	53336883
h3k4me1.q.05_peak_49980	chr17	79975011	79978109
h3k4me1.q.05_peak_42988	chr16	26029103	26030182
h3k4me1.q.05_peak_103472	chr8	35856363	35857720
h3k4me1.q.05_peak_9607	chr10	25283197	25283472
h3k4me1.q.05_peak_20638	chr11	114054355	114055553
h3k4me1.q.05_peak_64615	chr2	135976419	135976782
h3k4me1.q.05_peak_44196	chr16	46356679	46356893
h3k4me1.q.05_peak_59544	chr2	34015068	34017245
h3k4me1.q.05_peak_19746	chr11	100958723	100960072
h3k4me1.q.05_peak_65264	chr2	148264137	148264610
h3k4me1.q.05_peak_42533	chr16	17605280	17605522
h3k4me1.q.05_peak_104755	chr8	67727543	67727879
h3k4me1.q.05_peak_10893	chr10	56527045	56527442
h3k4me1.q.05_peak_47309	chr17	17594475	17594695
h3k4me1.q.05_peak_78970	chr4	108939563	108941505
h3k4me1.q.05_peak_103772	chr8	44155761	44156790
h3k4me1.q.05_peak_68572	chr3	38388796	38390100
h3k4me1.q.05_peak_32463	chr14	12449760	12450198
h3k4me1.q.05_peak_33922	chr14	48740291	48741799
h3k4me1.q.05_peak_98500	chr7	78263972	78265310
h3k4me1.q.05_peak_9433	chr10	21776184	21776656
h3k4me1.q.05_peak_72384	chr3	125716949	125718792
h3k4me1.q.05_peak_17505	chr11	60960461	60960691
h3k4me1.q.05_peak_89745	chr6	18682025	18682809
h3k4me1.q.05_peak_31695	chr13	109771674	109772586
h3k4me1.q.05_peak_52308	chr18	39912386	39913016
h3k4me1.q.05_peak_80693	chr4	138941491	138942423
h3k4me1.q.05_peak_115355	chrX	70314508	70315724
h3k4me1.q.05_peak_81530	chr4	152784778	152785244
h3k4me1.q.05_peak_61512	chr2	71295851	71296141
h3k4me1.q.05_peak_64460	chr2	133305748	133306596
h3k4me1.q.05_peak_32050	chr13	115673292	115674655
h3k4me1.q.05_peak_15756	chr11	24864579	24865981
h3k4me1.q.05_peak_67686	chr3	18441629	18442047
h3k4me1.q.05_peak_97632	chr7	63665691	63665959
h3k4me1.q.05_peak_61685	chr2	73276884	73277901
h3k4me1.q.05_peak_91524	chr6	54940056	54940717
h3k4me1.q.05_peak_86222	chr5	105976704	105976899
h3k4me1.q.05_peak_72301	chr3	123115963	123116504
h3k4me1.q.05_peak_107386	chr8	119491878	119492072
h3k4me1.q.05_peak_100495	chr7	118383976	118384367
h3k4me1.q.05_peak_52507	chr18	44299419	44299818
h3k4me1.q.05_peak_5477	chr1	136089417	136089717
h3k4me1.q.05_peak_56044	chr19	27028984	27029780
h3k4me1.q.05_peak_40755	chr15	84140147	84141535
h3k4me1.q.05_peak_91691	chr6	59350788	59352186
h3k4me1.q.05_peak_84802	chr5	74275620	74276378
h3k4me1.q.05_peak_60132	chr2	45629430	45630989
h3k4me1.q.05_peak_4112	chr1	97967498	97968267
h3k4me1.q.05_peak_86974	chr5	116911925	116913133
h3k4me1.q.05_peak_75774	chr4	43507911	43509648
h3k4me1.q.05_peak_100151	chr7	113156289	113157939
h3k4me1.q.05_peak_25695	chr12	100024039	100026767
h3k4me1.q.05_peak_52112	chr18	36374309	36375479
h3k4me1.q.05_peak_11744	chr10	72657644	72658787
h3k4me1.q.05_peak_24782	chr12	82726641	82726841
h3k4me1.q.05_peak_53225	chr18	57569403	57569748
h3k4me1.q.05_peak_3746	chr1	89680402	89680660
h3k4me1.q.05_peak_25889	chr12	103512843	103514407
h3k4me1.q.05_peak_7263	chr1	172358160	172358478
h3k4me1.q.05_peak_103534	chr8	36352684	36352930
h3k4me1.q.05_peak_113419	chr9	108204764	108205195
h3k4me1.q.05_peak_91845	chr6	64448830	64449280
h3k4me1.q.05_peak_93549	chr6	100366274	100366840
h3k4me1.q.05_peak_28014	chr13	35347966	35349199
h3k4me1.q.05_peak_88912	chr5	148793634	148793992
h3k4me1.q.05_peak_28843	chr13	49008244	49008688
h3k4me1.q.05_peak_70696	chr3	88255815	88256391
h3k4me1.q.05_peak_35343	chr14	76315184	76315408
h3k4me1.q.05_peak_92356	chr6	81673095	81673630
h3k4me1.q.05_peak_116258	chrX	136691263	136691695
h3k4me1.q.05_peak_110481	chr9	52337475	52337829
h3k4me1.q.05_peak_8781	chr10	8836295	8838010
h3k4me1.q.05_peak_5721	chr1	142389726	142390068
h3k4me1.q.05_peak_6068	chr1	153006111	153006313
h3k4me1.q.05_peak_43451	chr16	34300879	34301216
h3k4me1.q.05_peak_2160	chr1	60649047	60650097
h3k4me1.q.05_peak_63217	chr2	107506547	107508275
h3k4me1.q.05_peak_69412	chr3	57505428	57505716
h3k4me1.q.05_peak_57776	chr19	59649001	59650931
h3k4me1.q.05_peak_23372	chr12	51944958	51946546
h3k4me1.q.05_peak_116210	chrX	134170540	134171917
h3k4me1.q.05_peak_65157	chr2	146298371	146298623
h3k4me1.q.05_peak_57446	chr19	55455208	55458124
h3k4me1.q.05_peak_50526	chr17	88261687	88263252
h3k4me1.q.05_peak_4507	chr1	118923719	118924201
h3k4me1.q.05_peak_61034	chr2	62368365	62368762
h3k4me1.q.05_peak_73733	chr3	149443138	149443334
h3k4me1.q.05_peak_89944	chr6	23451598	23452084
h3k4me1.q.05_peak_23022	chr12	41716653	41717116
h3k4me1.q.05_peak_65888	chr2	160244408	160245508
h3k4me1.q.05_peak_10106	chr10	39403819	39404374
h3k4me1.q.05_peak_114265	chrX	7246343	7247022
h3k4me1.q.05_peak_26671	chr12	118110009	118110205
h3k4me1.q.05_peak_31607	chr13	108545716	108545956
h3k4me1.q.05_peak_1912	chr1	55910780	55911354
h3k4me1.q.05_peak_63881	chr2	121688546	121688969
h3k4me1.q.05_peak_93660	chr6	101449579	101450697
h3k4me1.q.05_peak_14396	chr10	121764945	121766146
h3k4me1.q.05_peak_14583	chr10	125916684	125917096
h3k4me1.q.05_peak_110656	chr9	56610652	56611147
h3k4me1.q.05_peak_107856	chr8	125516939	125517932
h3k4me1.q.05_peak_3766	chr1	89962192	89962946
h3k4me1.q.05_peak_33731	chr14	44834765	44835075
h3k4me1.q.05_peak_64756	chr2	138814026	138814743
h3k4me1.q.05_peak_77231	chr4	78088543	78089155
h3k4me1.q.05_peak_35161	chr14	73375621	73376271
h3k4me1.q.05_peak_108560	chr9	16583350	16583545
h3k4me1.q.05_peak_113262	chr9	106044099	106045005
h3k4me1.q.05_peak_57244	chr19	50394062	50394883
h3k4me1.q.05_peak_12848	chr10	93191027	93191462
h3k4me1.q.05_peak_32345	chr14	11009057	11009390
h3k4me1.q.05_peak_4166	chr1	100928384	100929021
h3k4me1.q.05_peak_5245	chr1	133312630	133313129
h3k4me1.q.05_peak_61346	chr2	68270390	68272527
h3k4me1.q.05_peak_11699	chr10	71683192	71684652
h3k4me1.q.05_peak_13937	chr10	114403794	114405892
h3k4me1.q.05_peak_49144	chr17	63403228	63406108
h3k4me1.q.05_peak_101927	chr7	145216802	145217120
h3k4me1.q.05_peak_63307	chr2	110485994	110487012
h3k4me1.q.05_peak_77008	chr4	71445805	71446182
h3k4me1.q.05_peak_5161	chr1	132574234	132574713
h3k4me1.q.05_peak_18659	chr11	82520633	82522105
h3k4me1.q.05_peak_71568	chr3	107443682	107444280
h3k4me1.q.05_peak_14046	chr10	116407668	116408238
h3k4me1.q.05_peak_4228	chr1	105255405	105256210
h3k4me1.q.05_peak_5837	chr1	148651974	148652346
h3k4me1.q.05_peak_106714	chr8	107490891	107491561
h3k4me1.q.05_peak_91350	chr6	53020284	53020560
h3k4me1.q.05_peak_106447	chr8	102626894	102627790
h3k4me1.q.05_peak_10646	chr10	49773716	49774145
h3k4me1.q.05_peak_114780	chrX	41614053	41614933
h3k4me1.q.05_peak_104453	chr8	58386552	58387651
h3k4me1.q.05_peak_68574	chr3	38433105	38434399
h3k4me1.q.05_peak_8340	chr1	192639707	192640930
h3k4me1.q.05_peak_28869	chr13	49316092	49317835
h3k4me1.q.05_peak_71880	chr3	115815585	115818268
h3k4me1.q.05_peak_47065	chr17	11876700	11876987
h3k4me1.q.05_peak_33553	chr14	34825402	34826920
h3k4me1.q.05_peak_106859	chr8	110189024	110189710
h3k4me1.q.05_peak_99146	chr7	93006267	93006729
h3k4me1.q.05_peak_66967	chr2	178670774	178671740
h3k4me1.q.05_peak_48597	chr17	49083734	49084607
h3k4me1.q.05_peak_85744	chr5	98151159	98151603
h3k4me1.q.05_peak_69306	chr3	55310290	55310520
h3k4me1.q.05_peak_22182	chr12	26832295	26832893
h3k4me1.q.05_peak_25258	chr12	91353541	91353773
h3k4me1.q.05_peak_102108	chr8	8362151	8362350
h3k4me1.q.05_peak_82970	chr5	33731201	33731597
h3k4me1.q.05_peak_14244	chr10	119885872	119886396
h3k4me1.q.05_peak_91286	chr6	52316241	52316818
h3k4me1.q.05_peak_55384	chr19	14424258	14427924
h3k4me1.q.05_peak_27291	chr13	20512090	20513311
h3k4me1.q.05_peak_20528	chr11	113290149	113290913
h3k4me1.q.05_peak_102963	chr8	26730214	26731267
h3k4me1.q.05_peak_110296	chr9	49117692	49119161
h3k4me1.q.05_peak_51218	chr18	16217073	16218036
h3k4me1.q.05_peak_84071	chr5	57848669	57849239
h3k4me1.q.05_peak_56706	chr19	41974066	41974457
h3k4me1.q.05_peak_80081	chr4	130878657	130878981
h3k4me1.q.05_peak_74108	chr3	157378206	157378548
h3k4me1.q.05_peak_41959	chr15	103229026	103229659
h3k4me1.q.05_peak_50923	chr18	10404699	10405482
h3k4me1.q.05_peak_13330	chr10	100877461	100878335
h3k4me1.q.05_peak_90808	chr6	40131725	40132054
h3k4me1.q.05_peak_29293	chr13	56350963	56351858
h3k4me1.q.05_peak_74870	chr4	21305944	21306358
h3k4me1.q.05_peak_30677	chr13	92566092	92567010
h3k4me1.q.05_peak_52306	chr18	39883246	39884524
h3k4me1.q.05_peak_30956	chr13	97333350	97333612
h3k4me1.q.05_peak_58116	chr2	6500985	6501181
h3k4me1.q.05_peak_108866	chr9	24955771	24957178
h3k4me1.q.05_peak_105135	chr8	77231662	77232777
h3k4me1.q.05_peak_7262	chr1	172356956	172357957
h3k4me1.q.05_peak_98308	chr7	74501230	74502081
h3k4me1.q.05_peak_23174	chr12	46194546	46195426
h3k4me1.q.05_peak_84367	chr5	66138345	66140075
h3k4me1.q.05_peak_31948	chr13	113911678	113912902
h3k4me1.q.05_peak_22213	chr12	27142911	27143816
h3k4me1.q.05_peak_58697	chr2	19488201	19488536
h3k4me1.q.05_peak_49422	chr17	67707554	67709105
h3k4me1.q.05_peak_54576	chr18	81573280	81574965
h3k4me1.q.05_peak_27975	chr13	34462689	34464036
h3k4me1.q.05_peak_6604	chr1	161383437	161384554
h3k4me1.q.05_peak_116607	chrX	157446690	157448478
h3k4me1.q.05_peak_58354	chr2	11033881	11035119
h3k4me1.q.05_peak_83603	chr5	46182065	46182911
h3k4me1.q.05_peak_44901	chr16	64334487	64334850
h3k4me1.q.05_peak_14582	chr10	125912061	125913063
h3k4me1.q.05_peak_2213	chr1	61417455	61419063
h3k4me1.q.05_peak_25850	chr12	102649022	102649891
h3k4me1.q.05_peak_54675	chr18	83331881	83334303
h3k4me1.q.05_peak_35788	chr14	86326271	86328608
h3k4me1.q.05_peak_42378	chr16	12699431	12700494
h3k4me1.q.05_peak_20650	chr11	114168053	114168699
h3k4me1.q.05_peak_63339	chr2	112533603	112535450
h3k4me1.q.05_peak_43428	chr16	33928774	33929416
h3k4me1.q.05_peak_70895	chr3	93596929	93597889
h3k4me1.q.05_peak_110365	chr9	50123353	50123775
h3k4me1.q.05_peak_115084	chrX	53220649	53220850
h3k4me1.q.05_peak_35525	chr14	78702254	78702658
h3k4me1.q.05_peak_13083	chr10	96138382	96139464
h3k4me1.q.05_peak_13109	chr10	96467365	96467885
h3k4me1.q.05_peak_115943	chrX	103804908	103805870
h3k4me1.q.05_peak_22507	chr12	31995062	31995429
h3k4me1.q.05_peak_7104	chr1	169931969	169932676
h3k4me1.q.05_peak_16489	chr11	37581854	37583643
h3k4me1.q.05_peak_43102	chr16	29547640	29548021
h3k4me1.q.05_peak_29346	chr13	57097251	57099042
h3k4me1.q.05_peak_71855	chr3	115587388	115587860
h3k4me1.q.05_peak_74748	chr4	15481250	15482031
h3k4me1.q.05_peak_24619	chr12	80018488	80018869
h3k4me1.q.05_peak_96938	chr7	40888530	40888951
h3k4me1.q.05_peak_37493	chr15	8715939	8717770
h3k4me1.q.05_peak_19841	chr11	102068433	102068815
h3k4me1.q.05_peak_89361	chr6	8466515	8468572
h3k4me1.q.05_peak_88265	chr5	136622659	136623036
h3k4me1.q.05_peak_12024	chr10	78395936	78396650
h3k4me1.q.05_peak_54825	chr18	87420639	87422080
h3k4me1.q.05_peak_45049	chr16	67870498	67872528
h3k4me1.q.05_peak_64389	chr2	132133706	132135343
h3k4me1.q.05_peak_85930	chr5	100203098	100203316
h3k4me1.q.05_peak_72147	chr3	120881950	120884787
h3k4me1.q.05_peak_9258	chr10	18777401	18777883
h3k4me1.q.05_peak_111081	chr9	61753517	61754485
h3k4me1.q.05_peak_19696	chr11	100295229	100295444
h3k4me1.q.05_peak_2232	chr1	61848224	61851548
h3k4me1.q.05_peak_86192	chr5	105679160	105679419
h3k4me1.q.05_peak_114926	chrX	49484946	49485313
h3k4me1.q.05_peak_84675	chr5	72653412	72653741
h3k4me1.q.05_peak_8739	chr10	8227831	8229012
h3k4me1.q.05_peak_19846	chr11	102096817	102097036
h3k4me1.q.05_peak_20452	chr11	112657008	112658236
h3k4me1.q.05_peak_105480	chr8	84070899	84071109
h3k4me1.q.05_peak_85702	chr5	97465180	97467723
h3k4me1.q.05_peak_37847	chr15	21366625	21367026
h3k4me1.q.05_peak_33588	chr14	35336335	35337333
h3k4me1.q.05_peak_103714	chr8	41578515	41578893
h3k4me1.q.05_peak_43824	chr16	40452744	40453327
h3k4me1.q.05_peak_48951	chr17	57928083	57929304
h3k4me1.q.05_peak_54294	chr18	76556075	76556977
h3k4me1.q.05_peak_103010	chr8	27679086	27679515
h3k4me1.q.05_peak_7750	chr1	181570845	181571482
h3k4me1.q.05_peak_76825	chr4	65711029	65711716
h3k4me1.q.05_peak_110532	chr9	53906378	53906920
h3k4me1.q.05_peak_58553	chr2	16531578	16532934
h3k4me1.q.05_peak_25630	chr12	99371565	99371931
h3k4me1.q.05_peak_45108	chr16	70562110	70562306
h3k4me1.q.05_peak_112332	chr9	87899551	87900159
h3k4me1.q.05_peak_79766	chr4	125975754	125976770
h3k4me1.q.05_peak_69257	chr3	54377699	54378014
h3k4me1.q.05_peak_93498	chr6	100030105	100030490
h3k4me1.q.05_peak_13223	chr10	98748437	98750525
h3k4me1.q.05_peak_86938	chr5	116453727	116454015
h3k4me1.q.05_peak_34145	chr14	55110627	55110821
h3k4me1.q.05_peak_27467	chr13	23998413	23999501
h3k4me1.q.05_peak_101870	chr7	144276622	144277244
h3k4me1.q.05_peak_37341	chr14	124222682	124225007
h3k4me1.q.05_peak_113254	chr9	105720429	105721544
h3k4me1.q.05_peak_10290	chr10	42043357	42043702
h3k4me1.q.05_peak_92934	chr6	92013378	92015102
h3k4me1.q.05_peak_90946	chr6	46406578	46407182
h3k4me1.q.05_peak_95001	chr6	129123184	129123399
h3k4me1.q.05_peak_107594	chr8	122194199	122195006
h3k4me1.q.05_peak_3672	chr1	88936861	88937123
h3k4me1.q.05_peak_75120	chr4	27895735	27895968
h3k4me1.q.05_peak_10842	chr10	54014074	54015050
h3k4me1.q.05_peak_54234	chr18	75705479	75706178
h3k4me1.q.05_peak_45656	chr16	81262155	81263679
h3k4me1.q.05_peak_93199	chr6	95674295	95675780
h3k4me1.q.05_peak_66970	chr2	178684254	178685242
h3k4me1.q.05_peak_111774	chr9	74225952	74226901
h3k4me1.q.05_peak_25256	chr12	91326370	91326962
h3k4me1.q.05_peak_51816	chr18	31441118	31441879
h3k4me1.q.05_peak_58238	chr2	8067582	8068296
h3k4me1.q.05_peak_84189	chr5	62893994	62894304
h3k4me1.q.05_peak_48614	chr17	49269345	49269541
h3k4me1.q.05_peak_68529	chr3	37767943	37770526
h3k4me1.q.05_peak_63000	chr2	104172946	104173153
h3k4me1.q.05_peak_81122	chr4	148326432	148328318
h3k4me1.q.05_peak_24374	chr12	75701294	75702143
h3k4me1.q.05_peak_54266	chr18	76089958	76090567
h3k4me1.q.05_peak_59129	chr2	28777530	28778429
h3k4me1.q.05_peak_49636	chr17	72087039	72087564
h3k4me1.q.05_peak_95502	chr6	143095180	143095758
h3k4me1.q.05_peak_104478	chr8	59317358	59318408
h3k4me1.q.05_peak_43794	chr16	39676128	39676342
h3k4me1.q.05_peak_104024	chr8	47994423	47995476
h3k4me1.q.05_peak_83096	chr5	36096652	36096899
h3k4me1.q.05_peak_65927	chr2	160735960	160736158
h3k4me1.q.05_peak_92697	chr6	88400484	88400905
h3k4me1.q.05_peak_30876	chr13	95788188	95789325
h3k4me1.q.05_peak_68313	chr3	33397256	33397837
h3k4me1.q.05_peak_104697	chr8	64807252	64807540
h3k4me1.q.05_peak_95816	chr6	147693652	147694641
h3k4me1.q.05_peak_104618	chr8	61969754	61970007
h3k4me1.q.05_peak_87130	chr5	118715196	118717210
h3k4me1.q.05_peak_91772	chr6	61543186	61544566
h3k4me1.q.05_peak_85942	chr5	100381485	100381815
h3k4me1.q.05_peak_86738	chr5	113516010	113517915
h3k4me1.q.05_peak_83767	chr5	50663626	50664157
h3k4me1.q.05_peak_75172	chr4	29211638	29211942
h3k4me1.q.05_peak_53355	chr18	60648427	60649552
h3k4me1.q.05_peak_14501	chr10	123594059	123594572
h3k4me1.q.05_peak_23103	chr12	44450653	44451044
h3k4me1.q.05_peak_68334	chr3	34234042	34234755
h3k4me1.q.05_peak_98799	chr7	83033001	83033221
h3k4me1.q.05_peak_92308	chr6	79387862	79388200
h3k4me1.q.05_peak_25759	chr12	100831229	100832328
h3k4me1.q.05_peak_114349	chrX	10453709	10454141
h3k4me1.q.05_peak_32373	chr14	11663948	11664714
h3k4me1.q.05_peak_55808	chr19	23162080	23163139
h3k4me1.q.05_peak_92738	chr6	88800798	88801155
h3k4me1.q.05_peak_85300	chr5	85996396	85997618
h3k4me1.q.05_peak_41009	chr15	87064637	87065942
h3k4me1.q.05_peak_92979	chr6	92921418	92922399
h3k4me1.q.05_peak_45500	chr16	77542251	77542593
h3k4me1.q.05_peak_53946	chr18	70205411	70205745
h3k4me1.q.05_peak_63940	chr2	123275622	123275959
h3k4me1.q.05_peak_40862	chr15	85314638	85315794
h3k4me1.q.05_peak_2578	chr1	67384007	67387608
h3k4me1.q.05_peak_710	chr1	24904877	24905712
h3k4me1.q.05_peak_80750	chr4	139817695	139819895
h3k4me1.q.05_peak_46596	chr17	4268622	4269473
h3k4me1.q.05_peak_83429	chr5	42575783	42576387
h3k4me1.q.05_peak_116442	chrX	143685880	143686503
h3k4me1.q.05_peak_95877	chr6	148917791	148918117
h3k4me1.q.05_peak_100284	chr7	115581784	115582103
h3k4me1.q.05_peak_82063	chr5	12473779	12475919
h3k4me1.q.05_peak_56317	chr19	32313561	32314669
h3k4me1.q.05_peak_76975	chr4	70377502	70377765
h3k4me1.q.05_peak_78533	chr4	102619372	102620018
h3k4me1.q.05_peak_104034	chr8	48126282	48126817
h3k4me1.q.05_peak_23319	chr12	50967867	50971620
h3k4me1.q.05_peak_28921	chr13	51729544	51731230
h3k4me1.q.05_peak_77545	chr4	84098802	84099477
h3k4me1.q.05_peak_19984	chr11	104084940	104085323
h3k4me1.q.05_peak_41321	chr15	93242806	93244018
h3k4me1.q.05_peak_25675	chr12	99756303	99758571
h3k4me1.q.05_peak_18640	chr11	82181211	82182000
h3k4me1.q.05_peak_102797	chr8	23553881	23554690
h3k4me1.q.05_peak_95703	chr6	145445207	145446648
h3k4me1.q.05_peak_98280	chr7	74172876	74174383
h3k4me1.q.05_peak_103361	chr8	34305868	34306314
h3k4me1.q.05_peak_83519	chr5	44653266	44655379
h3k4me1.q.05_peak_114559	chrX	14259458	14260510
h3k4me1.q.05_peak_101784	chr7	142792834	142793400
h3k4me1.q.05_peak_85926	chr5	100186752	100187066
h3k4me1.q.05_peak_116773	chrX	162115201	162116460
h3k4me1.q.05_peak_71345	chr3	103538687	103540119
h3k4me1.q.05_peak_51333	chr18	20721695	20722135
h3k4me1.q.05_peak_113679	chr9	114110367	114111019
h3k4me1.q.05_peak_310	chr1	14301091	14301657
h3k4me1.q.05_peak_44019	chr16	43434917	43436054
h3k4me1.q.05_peak_644	chr1	23911994	23913634
h3k4me1.q.05_peak_8881	chr10	10809456	10810510
h3k4me1.q.05_peak_54265	chr18	76087619	76087920
h3k4me1.q.05_peak_44370	chr16	50602088	50602744
h3k4me1.q.05_peak_53062	chr18	55383157	55383561
h3k4me1.q.05_peak_21666	chr12	10905488	10906501
h3k4me1.q.05_peak_106666	chr8	106619446	106619815
h3k4me1.q.05_peak_39013	chr15	50781351	50781635
h3k4me1.q.05_peak_68612	chr3	38918736	38919343
h3k4me1.q.05_peak_116987	chrX	169607560	169609473
h3k4me1.q.05_peak_78473	chr4	101404521	101405450
h3k4me1.q.05_peak_115626	chrX	92786196	92787626
h3k4me1.q.05_peak_12078	chr10	79936779	79937460
h3k4me1.q.05_peak_95552	chr6	143855233	143855642
h3k4me1.q.05_peak_66681	chr2	171134927	171135343
h3k4me1.q.05_peak_74761	chr4	16002724	16002978
h3k4me1.q.05_peak_13423	chr10	104529317	104529631
h3k4me1.q.05_peak_18626	chr11	81780715	81781344
h3k4me1.q.05_peak_4834	chr1	126992192	126993433
h3k4me1.q.05_peak_52727	chr18	47575287	47575606
h3k4me1.q.05_peak_59094	chr2	28290162	28291128
h3k4me1.q.05_peak_79855	chr4	127710309	127711537
h3k4me1.q.05_peak_35515	chr14	78556566	78556952
h3k4me1.q.05_peak_84519	chr5	67815511	67816322
h3k4me1.q.05_peak_103195	chr8	31720122	31721084
h3k4me1.q.05_peak_81043	chr4	143013091	143013355
h3k4me1.q.05_peak_18438	chr11	78690579	78692948
h3k4me1.q.05_peak_55681	chr19	20388085	20388364
h3k4me1.q.05_peak_23773	chr12	58873232	58873578
h3k4me1.q.05_peak_44691	chr16	58498947	58499675
h3k4me1.q.05_peak_51198	chr18	15543253	15544747
h3k4me1.q.05_peak_1337	chr1	40954049	40955348
h3k4me1.q.05_peak_29829	chr13	70675317	70675949
h3k4me1.q.05_peak_103633	chr8	39951075	39951480
h3k4me1.q.05_peak_95298	chr6	138325620	138325892
h3k4me1.q.05_peak_94264	chr6	114710835	114711193
h3k4me1.q.05_peak_89815	chr6	21591436	21592041
h3k4me1.q.05_peak_107129	chr8	114895813	114896734
h3k4me1.q.05_peak_22885	chr12	39656077	39656445
h3k4me1.q.05_peak_2364	chr1	63470223	63474604
h3k4me1.q.05_peak_5581	chr1	138023384	138024270
h3k4me1.q.05_peak_94582	chr6	120672201	120672764
h3k4me1.q.05_peak_20654	chr11	114191515	114193283
h3k4me1.q.05_peak_110067	chr9	46081979	46083857
h3k4me1.q.05_peak_57214	chr19	49879847	49881320
h3k4me1.q.05_peak_78131	chr4	95897320	95897882
h3k4me1.q.05_peak_20680	chr11	114433010	114434147
h3k4me1.q.05_peak_33180	chr14	27266475	27267024
h3k4me1.q.05_peak_56532	chr19	38150001	38150486
h3k4me1.q.05_peak_94873	chr6	127593753	127594154
h3k4me1.q.05_peak_2538	chr1	66558540	66558989
h3k4me1.q.05_peak_44757	chr16	61545700	61546380
h3k4me1.q.05_peak_90834	chr6	40634500	40635309
h3k4me1.q.05_peak_6393	chr1	157749197	157749901
h3k4me1.q.05_peak_58360	chr2	11210171	11210839
h3k4me1.q.05_peak_17676	chr11	64846368	64847386
h3k4me1.q.05_peak_53333	chr18	60100728	60101582
h3k4me1.q.05_peak_77959	chr4	91245348	91245643
h3k4me1.q.05_peak_50592	chr17	89519546	89519801
h3k4me1.q.05_peak_83117	chr5	36285392	36286050
h3k4me1.q.05_peak_86630	chr5	112513168	112513766
h3k4me1.q.05_peak_75557	chr4	35942914	35944216
h3k4me1.q.05_peak_50413	chr17	86781731	86782831
h3k4me1.q.05_peak_90347	chr6	31945419	31946501
h3k4me1.q.05_peak_24141	chr12	71598618	71599048
h3k4me1.q.05_peak_31400	chr13	104649315	104650517
h3k4me1.q.05_peak_87595	chr5	126008078	126008992
h3k4me1.q.05_peak_13324	chr10	100745445	100746594
h3k4me1.q.05_peak_36557	chr14	105010707	105011996
h3k4me1.q.05_peak_36006	chr14	93316793	93317494
h3k4me1.q.05_peak_32250	chr14	8933652	8934658
h3k4me1.q.05_peak_99690	chr7	101014026	101014301
h3k4me1.q.05_peak_6005	chr1	152047183	152047694
h3k4me1.q.05_peak_38959	chr15	48010058	48011795
h3k4me1.q.05_peak_17201	chr11	54597926	54598545
h3k4me1.q.05_peak_2163	chr1	60803673	60803875
h3k4me1.q.05_peak_116140	chrX	130549574	130549824
h3k4me1.q.05_peak_108947	chr9	27232480	27233452
h3k4me1.q.05_peak_77266	chr4	79595978	79596350
h3k4me1.q.05_peak_20569	chr11	113558022	113559531
h3k4me1.q.05_peak_6936	chr1	167638639	167639000
h3k4me1.q.05_peak_108076	chr8	128155988	128156680
h3k4me1.q.05_peak_105727	chr8	88423413	88423703
h3k4me1.q.05_peak_45112	chr16	70606776	70607230
h3k4me1.q.05_peak_15582	chr11	21989822	21990657
h3k4me1.q.05_peak_111200	chr9	63419742	63421284
h3k4me1.q.05_peak_103926	chr8	46622630	46623340
h3k4me1.q.05_peak_96015	chr7	6775959	6777991
h3k4me1.q.05_peak_14925	chr11	5059814	5060008
h3k4me1.q.05_peak_22282	chr12	28401554	28402404
h3k4me1.q.05_peak_49092	chr17	62977422	62977684
h3k4me1.q.05_peak_94300	chr6	115047612	115047999
h3k4me1.q.05_peak_87088	chr5	118388441	118388901
h3k4me1.q.05_peak_90736	chr6	39038820	39039893
h3k4me1.q.05_peak_93835	chr6	106077350	106078981
h3k4me1.q.05_peak_76468	chr4	57109154	57110103
h3k4me1.q.05_peak_33490	chr14	33669916	33670692
h3k4me1.q.05_peak_63218	chr2	107552811	107553219
h3k4me1.q.05_peak_1119	chr1	36985557	36986221
h3k4me1.q.05_peak_70080	chr3	76645483	76645812
h3k4me1.q.05_peak_92343	chr6	80917771	80917991
h3k4me1.q.05_peak_99231	chr7	95617425	95618657
h3k4me1.q.05_peak_15597	chr11	22197684	22201564
h3k4me1.q.05_peak_91938	chr6	67158730	67159252
h3k4me1.q.05_peak_73601	chr3	147816893	147817337
h3k4me1.q.05_peak_49455	chr17	68710499	68711308
h3k4me1.q.05_peak_2104	chr1	59508129	59508919
h3k4me1.q.05_peak_68022	chr3	27577363	27578399
h3k4me1.q.05_peak_90168	chr6	29023496	29024259
h3k4me1.q.05_peak_63083	chr2	105607361	105609403
h3k4me1.q.05_peak_18095	chr11	72159464	72159911
h3k4me1.q.05_peak_98015	chr7	69172416	69172630
h3k4me1.q.05_peak_29622	chr13	63324434	63324831
h3k4me1.q.05_peak_40765	chr15	84253779	84254638
h3k4me1.q.05_peak_80152	chr4	131430535	131431888
h3k4me1.q.05_peak_104286	chr8	54486679	54486967
h3k4me1.q.05_peak_40757	chr15	84216618	84217575
h3k4me1.q.05_peak_90941	chr6	46253040	46253555
h3k4me1.q.05_peak_56668	chr19	41650230	41650452
h3k4me1.q.05_peak_63500	chr2	115537546	115539304
h3k4me1.q.05_peak_98268	chr7	74001136	74001738
h3k4me1.q.05_peak_109814	chr9	42728515	42728921
h3k4me1.q.05_peak_36228	chr14	98705172	98705716
h3k4me1.q.05_peak_84083	chr5	58073443	58073790
h3k4me1.q.05_peak_51825	chr18	31755029	31755400
h3k4me1.q.05_peak_86094	chr5	103463708	103464119
h3k4me1.q.05_peak_63291	chr2	110210787	110211439
h3k4me1.q.05_peak_50863	chr18	8136411	8138638
h3k4me1.q.05_peak_83247	chr5	38062355	38062951
h3k4me1.q.05_peak_47737	chr17	29220504	29221152
h3k4me1.q.05_peak_31246	chr13	101910856	101911202
h3k4me1.q.05_peak_79836	chr4	127222884	127223347
h3k4me1.q.05_peak_74148	chr3	158548601	158549892
h3k4me1.q.05_peak_83692	chr5	48532030	48532357
h3k4me1.q.05_peak_89920	chr6	23243765	23245155
h3k4me1.q.05_peak_49327	chr17	66349913	66350617
h3k4me1.q.05_peak_77469	chr4	82950764	82951206
h3k4me1.q.05_peak_6345	chr1	157101054	157101805
h3k4me1.q.05_peak_76103	chr4	48944720	48945815
h3k4me1.q.05_peak_83338	chr5	39482514	39483211
h3k4me1.q.05_peak_38303	chr15	31659623	31659872
h3k4me1.q.05_peak_116214	chrX	134284943	134286247
h3k4me1.q.05_peak_41398	chr15	94451090	94452164
h3k4me1.q.05_peak_23953	chr12	68719098	68719814
h3k4me1.q.05_peak_112278	chr9	86668239	86669042
h3k4me1.q.05_peak_67692	chr3	18630716	18631045
h3k4me1.q.05_peak_115695	chrX	94793293	94795395
h3k4me1.q.05_peak_29553	chr13	60347806	60348205
h3k4me1.q.05_peak_54366	chr18	78084967	78085884
h3k4me1.q.05_peak_115756	chrX	99243156	99243475
h3k4me1.q.05_peak_21232	chr11	120308022	120308217
h3k4me1.q.05_peak_7213	chr1	171599525	171599743
h3k4me1.q.05_peak_62575	chr2	93587040	93587739
h3k4me1.q.05_peak_18850	chr11	86003403	86003966
h3k4me1.q.05_peak_9379	chr10	20841870	20844309
h3k4me1.q.05_peak_42065	chr16	5101273	5101504
h3k4me1.q.05_peak_67844	chr3	21952561	21953047
h3k4me1.q.05_peak_18722	chr11	83495170	83495889
h3k4me1.q.05_peak_96756	chr7	36526096	36526336
h3k4me1.q.05_peak_24495	chr12	78133017	78134609
h3k4me1.q.05_peak_111309	chr9	64924844	64925087
h3k4me1.q.05_peak_65210	chr2	146986290	146986865
h3k4me1.q.05_peak_9174	chr10	17575528	17576850
h3k4me1.q.05_peak_87741	chr5	129188914	129190042
h3k4me1.q.05_peak_112080	chr9	82788141	82788983
h3k4me1.q.05_peak_59839	chr2	38786144	38786910
h3k4me1.q.05_peak_107270	chr8	117370795	117371069
h3k4me1.q.05_peak_28473	chr13	44132061	44132394
h3k4me1.q.05_peak_7918	chr1	184726837	184728332
h3k4me1.q.05_peak_115361	chrX	70605863	70607886
h3k4me1.q.05_peak_56085	chr19	27917214	27917438
h3k4me1.q.05_peak_18301	chr11	76418524	76419193
h3k4me1.q.05_peak_42157	chr16	7044136	7045446
h3k4me1.q.05_peak_67904	chr3	24779018	24779516
h3k4me1.q.05_peak_22658	chr12	34168908	34169643
h3k4me1.q.05_peak_97194	chr7	47021163	47021419
h3k4me1.q.05_peak_80669	chr4	138487876	138489146
h3k4me1.q.05_peak_1018	chr1	35265093	35266070
h3k4me1.q.05_peak_39906	chr15	69161047	69161273
h3k4me1.q.05_peak_2237	chr1	61923568	61924131
h3k4me1.q.05_peak_25396	chr12	94596656	94596959
h3k4me1.q.05_peak_70148	chr3	79153241	79153969
h3k4me1.q.05_peak_107038	chr8	113720631	113722366
h3k4me1.q.05_peak_4052	chr1	95578139	95579574
h3k4me1.q.05_peak_34252	chr14	57621823	57622897
h3k4me1.q.05_peak_111303	chr9	64664246	64665523
h3k4me1.q.05_peak_76993	chr4	70740834	70743834
h3k4me1.q.05_peak_16079	chr11	32704061	32704746
h3k4me1.q.05_peak_115367	chrX	70980016	70980247
h3k4me1.q.05_peak_100389	chr7	117150424	117151294
h3k4me1.q.05_peak_35730	chr14	84549568	84550579
h3k4me1.q.05_peak_84539	chr5	68055711	68056038
h3k4me1.q.05_peak_42347	chr16	11775596	11776981
h3k4me1.q.05_peak_45272	chr16	73428290	73429630
h3k4me1.q.05_peak_37382	chr15	5148554	5149756
h3k4me1.q.05_peak_28205	chr13	39774007	39774681
h3k4me1.q.05_peak_12643	chr10	90142047	90142299
h3k4me1.q.05_peak_7828	chr1	182751592	182751793
h3k4me1.q.05_peak_87111	chr5	118588169	118592697
h3k4me1.q.05_peak_58104	chr2	6402572	6404223
h3k4me1.q.05_peak_82029	chr5	9665213	9665528
h3k4me1.q.05_peak_15385	chr11	18870075	18872065
h3k4me1.q.05_peak_95272	chr6	137823206	137824780
h3k4me1.q.05_peak_42102	chr16	5996671	5998596
h3k4me1.q.05_peak_14511	chr10	123811963	123813617
h3k4me1.q.05_peak_66090	chr2	163869674	163870931
h3k4me1.q.05_peak_74315	chr4	6935994	6936528
h3k4me1.q.05_peak_68838	chr3	45681131	45682434
h3k4me1.q.05_peak_98676	chr7	80646053	80646315
h3k4me1.q.05_peak_69846	chr3	68433595	68436114
h3k4me1.q.05_peak_18589	chr11	81416200	81416589
h3k4me1.q.05_peak_65985	chr2	161661729	161663094
h3k4me1.q.05_peak_26720	chr12	119232194	119232410
h3k4me1.q.05_peak_41047	chr15	87733139	87733482
h3k4me1.q.05_peak_111173	chr9	63138058	63138952
h3k4me1.q.05_peak_98449	chr7	77051918	77052347
h3k4me1.q.05_peak_620	chr1	23474331	23474554
h3k4me1.q.05_peak_38394	chr15	33360270	33360870
h3k4me1.q.05_peak_91427	chr6	53906724	53910372
h3k4me1.q.05_peak_62027	chr2	79026345	79027915
h3k4me1.q.05_peak_30853	chr13	95497158	95498578
h3k4me1.q.05_peak_84075	chr5	57868329	57868967
h3k4me1.q.05_peak_50583	chr17	89000040	89000321
h3k4me1.q.05_peak_3802	chr1	90346401	90346752
h3k4me1.q.05_peak_95861	chr6	148563938	148564637
h3k4me1.q.05_peak_1471	chr1	43316984	43317763
h3k4me1.q.05_peak_77696	chr4	86335487	86336318
h3k4me1.q.05_peak_69000	chr3	51111607	51113219
h3k4me1.q.05_peak_86312	chr5	107125877	107127023
h3k4me1.q.05_peak_53877	chr18	69431634	69431950
h3k4me1.q.05_peak_79666	chr4	124709912	124710937
h3k4me1.q.05_peak_95652	chr6	144710848	144712713
h3k4me1.q.05_peak_84354	chr5	65883476	65883902
h3k4me1.q.05_peak_54847	chr18	88510812	88511137
h3k4me1.q.05_peak_16673	chr11	42954162	42954848
h3k4me1.q.05_peak_58168	chr2	6853776	6854293
h3k4me1.q.05_peak_72142	chr3	120786138	120786342
h3k4me1.q.05_peak_9292	chr10	19400446	19402285
h3k4me1.q.05_peak_10294	chr10	42088888	42090328
h3k4me1.q.05_peak_97045	chr7	45150870	45151702
h3k4me1.q.05_peak_84380	chr5	66315707	66316525
h3k4me1.q.05_peak_47477	chr17	25476370	25476823
h3k4me1.q.05_peak_100401	chr7	117320135	117321185
h3k4me1.q.05_peak_28448	chr13	43906077	43909179
h3k4me1.q.05_peak_70926	chr3	94922328	94922609
h3k4me1.q.05_peak_46061	chr16	90692641	90693114
h3k4me1.q.05_peak_14436	chr10	122553381	122553715
h3k4me1.q.05_peak_4409	chr1	111019686	111021687
h3k4me1.q.05_peak_98031	chr7	69664361	69665384
h3k4me1.q.05_peak_32330	chr14	10683069	10683721
h3k4me1.q.05_peak_78966	chr4	108891146	108891394
h3k4me1.q.05_peak_88409	chr5	139555162	139555948
h3k4me1.q.05_peak_35702	chr14	81856904	81858316
h3k4me1.q.05_peak_21330	chr12	3732132	3733956
h3k4me1.q.05_peak_61268	chr2	66177202	66180978
h3k4me1.q.05_peak_35704	chr14	81869932	81871485
h3k4me1.q.05_peak_98827	chr7	83541404	83542368
h3k4me1.q.05_peak_90632	chr6	36947349	36948388
h3k4me1.q.05_peak_62615	chr2	94184169	94184627
h3k4me1.q.05_peak_32908	chr14	22297412	22297610
h3k4me1.q.05_peak_75163	chr4	29075223	29075540
h3k4me1.q.05_peak_60362	chr2	50539036	50539358
h3k4me1.q.05_peak_50756	chr18	4869358	4870227
h3k4me1.q.05_peak_109082	chr9	29118702	29119026
h3k4me1.q.05_peak_110896	chr9	59961328	59961813
h3k4me1.q.05_peak_116868	chrX	165677562	165677874
h3k4me1.q.05_peak_533	chr1	21406836	21407818
h3k4me1.q.05_peak_72849	chr3	134564439	134565130
h3k4me1.q.05_peak_37102	chr14	120119198	120120221
h3k4me1.q.05_peak_99069	chr7	91529435	91529826
h3k4me1.q.05_peak_103736	chr8	41947644	41948851
h3k4me1.q.05_peak_16921	chr11	48186444	48187456
h3k4me1.q.05_peak_39599	chr15	62422878	62423461
h3k4me1.q.05_peak_63659	chr2	117543211	117543639
h3k4me1.q.05_peak_86075	chr5	103340009	103340250
h3k4me1.q.05_peak_117008	chrX	169874074	169875465
h3k4me1.q.05_peak_4354	chr1	107728466	107728803
h3k4me1.q.05_peak_11820	chr10	75006877	75007676
h3k4me1.q.05_peak_49981	chr17	79979450	79980895
h3k4me1.q.05_peak_62919	chr2	102863771	102864446
h3k4me1.q.05_peak_40955	chr15	86242854	86243220
h3k4me1.q.05_peak_74843	chr4	20515274	20515679
h3k4me1.q.05_peak_9430	chr10	21745968	21746340
h3k4me1.q.05_peak_106594	chr8	105464091	105465038
h3k4me1.q.05_peak_25442	chr12	95761895	95762795
h3k4me1.q.05_peak_19302	chr11	94130700	94130923
h3k4me1.q.05_peak_74629	chr4	13450949	13452720
h3k4me1.q.05_peak_33785	chr14	46434125	46434968
h3k4me1.q.05_peak_54637	chr18	82837207	82838116
h3k4me1.q.05_peak_45074	chr16	69646146	69646553
h3k4me1.q.05_peak_58721	chr2	20400824	20401069
h3k4me1.q.05_peak_98848	chr7	84044262	84045377
h3k4me1.q.05_peak_111281	chr9	64457856	64458078
h3k4me1.q.05_peak_56548	chr19	38324297	38325421
h3k4me1.q.05_peak_90435	chr6	33173662	33174263
h3k4me1.q.05_peak_56184	chr19	29303026	29303356
h3k4me1.q.05_peak_67867	chr3	22741979	22742363
h3k4me1.q.05_peak_76423	chr4	56127349	56129742
h3k4me1.q.05_peak_20988	chr11	117888528	117891187
h3k4me1.q.05_peak_45141	chr16	71539110	71539641
h3k4me1.q.05_peak_45586	chr16	78725668	78726578
h3k4me1.q.05_peak_38949	chr15	47746961	47747340
h3k4me1.q.05_peak_37020	chr14	118657685	118658198
h3k4me1.q.05_peak_20425	chr11	112154369	112155950
h3k4me1.q.05_peak_24516	chr12	78927109	78927826
h3k4me1.q.05_peak_91347	chr6	52966448	52967043
h3k4me1.q.05_peak_98961	chr7	89477387	89479146
h3k4me1.q.05_peak_65303	chr2	150015938	150017193
h3k4me1.q.05_peak_94245	chr6	114272276	114273100
h3k4me1.q.05_peak_16643	chr11	41970389	41970606
h3k4me1.q.05_peak_76878	chr4	66475307	66475990
h3k4me1.q.05_peak_64816	chr2	140523117	140523725
h3k4me1.q.05_peak_20220	chr11	108294587	108295555
h3k4me1.q.05_peak_107127	chr8	114884270	114885919
h3k4me1.q.05_peak_27790	chr13	29578703	29579553
h3k4me1.q.05_peak_12872	chr10	93419225	93419647
h3k4me1.q.05_peak_26475	chr12	112395054	112396303
h3k4me1.q.05_peak_61352	chr2	68361141	68361433
h3k4me1.q.05_peak_51912	chr18	33888674	33892941
h3k4me1.q.05_peak_55947	chr19	25324794	25326493
h3k4me1.q.05_peak_81967	chr5	8223720	8224744
h3k4me1.q.05_peak_15161	chr11	11242520	11243234
h3k4me1.q.05_peak_100052	chr7	112213019	112214018
h3k4me1.q.05_peak_29907	chr13	72404392	72404605
h3k4me1.q.05_peak_16701	chr11	43344572	43345439
h3k4me1.q.05_peak_92301	chr6	78684803	78685130
h3k4me1.q.05_peak_846	chr1	31051874	31052189
h3k4me1.q.05_peak_107114	chr8	114730582	114732942
h3k4me1.q.05_peak_67966	chr3	26141382	26142088
h3k4me1.q.05_peak_29517	chr13	59966650	59966907
h3k4me1.q.05_peak_3164	chr1	77526078	77528903
h3k4me1.q.05_peak_89029	chr5	150634075	150635031
h3k4me1.q.05_peak_15451	chr11	19763478	19765312
h3k4me1.q.05_peak_62290	chr2	85223615	85224792
h3k4me1.q.05_peak_94461	chr6	118686481	118686846
h3k4me1.q.05_peak_27823	chr13	30084883	30085369
h3k4me1.q.05_peak_99083	chr7	92014194	92014702
h3k4me1.q.05_peak_103505	chr8	36110433	36110973
h3k4me1.q.05_peak_38010	chr15	26618770	26621174
h3k4me1.q.05_peak_42403	chr16	13607733	13609022
h3k4me1.q.05_peak_87580	chr5	125756553	125757496
h3k4me1.q.05_peak_20648	chr11	114152170	114154148
h3k4me1.q.05_peak_87317	chr5	122052425	122055113
h3k4me1.q.05_peak_45531	chr16	77819714	77819919
h3k4me1.q.05_peak_46565	chr17	3584354	3584566
h3k4me1.q.05_peak_87295	chr5	121902208	121905191
h3k4me1.q.05_peak_18252	chr11	75893737	75895496
h3k4me1.q.05_peak_13669	chr10	109450469	109450810
h3k4me1.q.05_peak_31258	chr13	102273458	102274026
h3k4me1.q.05_peak_66991	chr2	178888467	178888681
h3k4me1.q.05_peak_70350	chr3	82051570	82052080
h3k4me1.q.05_peak_61763	chr2	74408616	74410506
h3k4me1.q.05_peak_24310	chr12	74108204	74109116
h3k4me1.q.05_peak_76500	chr4	57659877	57661605
h3k4me1.q.05_peak_93814	chr6	104808264	104809980
h3k4me1.q.05_peak_56288	chr19	31530197	31531190
h3k4me1.q.05_peak_53081	chr18	55559190	55559546
h3k4me1.q.05_peak_52699	chr18	47306026	47314282
h3k4me1.q.05_peak_94741	chr6	125074080	125074453
h3k4me1.q.05_peak_56284	chr19	31392587	31393781
h3k4me1.q.05_peak_57850	chr19	60783789	60784295
h3k4me1.q.05_peak_74012	chr3	155355517	155355904
h3k4me1.q.05_peak_86703	chr5	113148227	113149702
h3k4me1.q.05_peak_10947	chr10	57841598	57842263
h3k4me1.q.05_peak_97465	chr7	55222379	55224260
h3k4me1.q.05_peak_58212	chr2	7272895	7273710
h3k4me1.q.05_peak_39791	chr15	66796574	66797411
h3k4me1.q.05_peak_101896	chr7	144797128	144797330
h3k4me1.q.05_peak_84862	chr5	75198398	75200448
h3k4me1.q.05_peak_9431	chr10	21746655	21747564
h3k4me1.q.05_peak_49374	chr17	66877569	66877793
h3k4me1.q.05_peak_38636	chr15	38451022	38451378
h3k4me1.q.05_peak_68270	chr3	32317609	32317917
h3k4me1.q.05_peak_104564	chr8	61332166	61332521
h3k4me1.q.05_peak_90448	chr6	33446439	33446825
h3k4me1.q.05_peak_7517	chr1	177768517	177768722
h3k4me1.q.05_peak_56006	chr19	26532014	26534988
h3k4me1.q.05_peak_91720	chr6	61064642	61065244
h3k4me1.q.05_peak_5596	chr1	138280960	138283691
h3k4me1.q.05_peak_37338	chr14	124163025	124164545
h3k4me1.q.05_peak_87679	chr5	127929846	127930245
h3k4me1.q.05_peak_33303	chr14	29702791	29703097
h3k4me1.q.05_peak_95614	chr6	144376646	144378562
h3k4me1.q.05_peak_12926	chr10	94230164	94231096
h3k4me1.q.05_peak_5940	chr1	151338981	151339336
h3k4me1.q.05_peak_67648	chr3	17770543	17771091
h3k4me1.q.05_peak_74990	chr4	24057350	24057990
h3k4me1.q.05_peak_7654	chr1	179964868	179965212
h3k4me1.q.05_peak_31362	chr13	103958765	103960412
h3k4me1.q.05_peak_25025	chr12	86363396	86365714
h3k4me1.q.05_peak_15774	chr11	25330355	25330940
h3k4me1.q.05_peak_27510	chr13	24548943	24549587
h3k4me1.q.05_peak_112616	chr9	95167478	95167943
h3k4me1.q.05_peak_2975	chr1	75474154	75474466
h3k4me1.q.05_peak_7909	chr1	184326194	184326566
h3k4me1.q.05_peak_41184	chr15	90827071	90828604
h3k4me1.q.05_peak_115994	chrX	106870928	106873328
h3k4me1.q.05_peak_102185	chr8	9220815	9221115
h3k4me1.q.05_peak_56518	chr19	37886577	37886918
h3k4me1.q.05_peak_50588	chr17	89297160	89298415
h3k4me1.q.05_peak_29626	chr13	63496186	63497669
h3k4me1.q.05_peak_17182	chr11	54106746	54108001
h3k4me1.q.05_peak_2705	chr1	71117305	71118117
h3k4me1.q.05_peak_109040	chr9	28465316	28465714
h3k4me1.q.05_peak_93563	chr6	100510125	100511048
h3k4me1.q.05_peak_7065	chr1	169187167	169188642
h3k4me1.q.05_peak_86525	chr5	111663138	111663872
h3k4me1.q.05_peak_103526	chr8	36280339	36281196
h3k4me1.q.05_peak_64813	chr2	140495083	140496111
h3k4me1.q.05_peak_9009	chr10	13339583	13341539
h3k4me1.q.05_peak_58775	chr2	20938029	20938398
h3k4me1.q.05_peak_28673	chr13	46871938	46872635
h3k4me1.q.05_peak_97244	chr7	49143906	49144973
h3k4me1.q.05_peak_49797	chr17	75081754	75083168
h3k4me1.q.05_peak_29433	chr13	58484899	58485364
h3k4me1.q.05_peak_116521	chrX	151707679	151709004
h3k4me1.q.05_peak_110934	chr9	60505110	60505474
h3k4me1.q.05_peak_39160	chr15	53296103	53297082
h3k4me1.q.05_peak_100352	chr7	116259365	116259681
h3k4me1.q.05_peak_8222	chr1	190080179	190080435
h3k4me1.q.05_peak_15471	chr11	20038486	20039449
h3k4me1.q.05_peak_92750	chr6	88927520	88930378
h3k4me1.q.05_peak_26809	chr13	6338424	6339012
h3k4me1.q.05_peak_114630	chrX	20415766	20415960
h3k4me1.q.05_peak_95296	chr6	138191265	138192555
h3k4me1.q.05_peak_63053	chr2	105264077	105264925
h3k4me1.q.05_peak_105946	chr8	91565217	91567959
h3k4me1.q.05_peak_23533	chr12	53841153	53844988
h3k4me1.q.05_peak_52214	chr18	38439968	38440991
h3k4me1.q.05_peak_63958	chr2	123817118	123817422
h3k4me1.q.05_peak_102255	chr8	10646379	10646854
h3k4me1.q.05_peak_29135	chr13	54375425	54376735
h3k4me1.q.05_peak_9763	chr10	28549633	28550982
h3k4me1.q.05_peak_79340	chr4	118902138	118902731
h3k4me1.q.05_peak_83921	chr5	53323112	53323913
h3k4me1.q.05_peak_24418	chr12	76615131	76615819
h3k4me1.q.05_peak_44671	chr16	57853941	57854148
h3k4me1.q.05_peak_103603	chr8	38533603	38534432
h3k4me1.q.05_peak_76935	chr4	69492774	69492986
h3k4me1.q.05_peak_102890	chr8	25525032	25525579
h3k4me1.q.05_peak_86218	chr5	105944033	105944665
h3k4me1.q.05_peak_84128	chr5	61108241	61108714
h3k4me1.q.05_peak_16591	chr11	40509988	40511467
h3k4me1.q.05_peak_39769	chr15	66373939	66374245
h3k4me1.q.05_peak_4420	chr1	112389623	112389883
h3k4me1.q.05_peak_87078	chr5	118316660	118316951
h3k4me1.q.05_peak_65666	chr2	156915388	156915871
h3k4me1.q.05_peak_99296	chr7	96381052	96381374
h3k4me1.q.05_peak_34342	chr14	59793729	59794427
h3k4me1.q.05_peak_99977	chr7	110641958	110643922
h3k4me1.q.05_peak_47542	chr17	26356400	26357552
h3k4me1.q.05_peak_80725	chr4	139500909	139501362
h3k4me1.q.05_peak_18678	chr11	82692354	82693176
h3k4me1.q.05_peak_104719	chr8	65956246	65957681
h3k4me1.q.05_peak_56355	chr19	32956082	32957654
h3k4me1.q.05_peak_41682	chr15	99042789	99043012
h3k4me1.q.05_peak_28935	chr13	51841210	51843772
h3k4me1.q.05_peak_6484	chr1	159415221	159417852
h3k4me1.q.05_peak_5339	chr1	134320387	134321324
h3k4me1.q.05_peak_53729	chr18	67033290	67033645
h3k4me1.q.05_peak_106371	chr8	100227990	100228325
h3k4me1.q.05_peak_98342	chr7	75239260	75239476
h3k4me1.q.05_peak_78397	chr4	100169327	100171948
h3k4me1.q.05_peak_10285	chr10	41994095	41995980
h3k4me1.q.05_peak_63321	chr2	112200333	112200531
h3k4me1.q.05_peak_53073	chr18	55494406	55495631
h3k4me1.q.05_peak_110178	chr9	47574055	47574277
h3k4me1.q.05_peak_101775	chr7	142568989	142569387
h3k4me1.q.05_peak_63519	chr2	115706571	115706889
h3k4me1.q.05_peak_46415	chr16	96325952	96326915
h3k4me1.q.05_peak_105088	chr8	74903299	74903501
h3k4me1.q.05_peak_46566	chr17	3598083	3598286
h3k4me1.q.05_peak_116448	chrX	143800690	143800986
h3k4me1.q.05_peak_21143	chr11	119362652	119363329
h3k4me1.q.05_peak_71516	chr3	105989504	105989908
h3k4me1.q.05_peak_108299	chr9	12945790	12945990
h3k4me1.q.05_peak_83119	chr5	36310594	36311040
h3k4me1.q.05_peak_57499	chr19	55923886	55924586
h3k4me1.q.05_peak_13023	chr10	95287694	95288041
h3k4me1.q.05_peak_16344	chr11	36136146	36138514
h3k4me1.q.05_peak_85179	chr5	83679389	83679797
h3k4me1.q.05_peak_96508	chr7	29469380	29470405
h3k4me1.q.05_peak_109811	chr9	42651878	42652161
h3k4me1.q.05_peak_69603	chr3	63223444	63224450
h3k4me1.q.05_peak_77153	chr4	76197975	76198196
h3k4me1.q.05_peak_18641	chr11	82189829	82190494
h3k4me1.q.05_peak_596	chr1	23007604	23008706
h3k4me1.q.05_peak_75259	chr4	31833794	31835632
h3k4me1.q.05_peak_70457	chr3	84244893	84245099
h3k4me1.q.05_peak_57203	chr19	49675888	49676403
h3k4me1.q.05_peak_91807	chr6	63416908	63418108
h3k4me1.q.05_peak_114451	chrX	11964387	11964858
h3k4me1.q.05_peak_22786	chr12	36853129	36853885
h3k4me1.q.05_peak_26266	chr12	109037934	109040001
h3k4me1.q.05_peak_56836	chr19	44310792	44311616
h3k4me1.q.05_peak_71143	chr3	99277866	99278377
h3k4me1.q.05_peak_105893	chr8	90769570	90770306
h3k4me1.q.05_peak_97637	chr7	63765066	63765696
h3k4me1.q.05_peak_95129	chr6	135323477	135323866
h3k4me1.q.05_peak_24007	chr12	69760795	69761365
h3k4me1.q.05_peak_63536	chr2	115876243	115876716
h3k4me1.q.05_peak_35930	chr14	90253270	90253546
h3k4me1.q.05_peak_52774	chr18	49546985	49547260
h3k4me1.q.05_peak_45455	chr16	77095531	77096303
h3k4me1.q.05_peak_55095	chr19	6611367	6611590
h3k4me1.q.05_peak_75486	chr4	34874127	34874396
h3k4me1.q.05_peak_104728	chr8	66404814	66405751
h3k4me1.q.05_peak_32044	chr13	115425638	115428856
h3k4me1.q.05_peak_56147	chr19	28640409	28641496
h3k4me1.q.05_peak_97566	chr7	61751600	61751879
h3k4me1.q.05_peak_89786	chr6	20641667	20642031
h3k4me1.q.05_peak_85155	chr5	82715577	82716079
h3k4me1.q.05_peak_39159	chr15	53288954	53289384
h3k4me1.q.05_peak_72957	chr3	136876670	136876957
h3k4me1.q.05_peak_42844	chr16	24268494	24269396
h3k4me1.q.05_peak_93815	chr6	104879039	104880099
h3k4me1.q.05_peak_29398	chr13	57890981	57891177
h3k4me1.q.05_peak_23278	chr12	50479251	50480288
h3k4me1.q.05_peak_94801	chr6	126384221	126385183
h3k4me1.q.05_peak_58643	chr2	18758037	18758522
h3k4me1.q.05_peak_35207	chr14	74531122	74531492
h3k4me1.q.05_peak_38431	chr15	34829503	34829812
h3k4me1.q.05_peak_4244	chr1	105437851	105438200
h3k4me1.q.05_peak_52823	chr18	50853067	50853332
h3k4me1.q.05_peak_75502	chr4	35089284	35090290
h3k4me1.q.05_peak_12442	chr10	85446650	85447328
h3k4me1.q.05_peak_22354	chr12	29371025	29371238
h3k4me1.q.05_peak_7068	chr1	169259581	169263067
h3k4me1.q.05_peak_2427	chr1	64318529	64319130
h3k4me1.q.05_peak_47268	chr17	16004845	16005612
h3k4me1.q.05_peak_85639	chr5	96702585	96703513
h3k4me1.q.05_peak_70112	chr3	78536332	78536535
h3k4me1.q.05_peak_75106	chr4	26965966	26966266
h3k4me1.q.05_peak_74454	chr4	9514366	9515664
h3k4me1.q.05_peak_88264	chr5	136619944	136620323
h3k4me1.q.05_peak_33587	chr14	35327607	35327992
h3k4me1.q.05_peak_77889	chr4	89567682	89569125
h3k4me1.q.05_peak_45499	chr16	77541584	77542020
h3k4me1.q.05_peak_116030	chrX	110317513	110319154
h3k4me1.q.05_peak_71503	chr3	105756414	105758123
h3k4me1.q.05_peak_79901	chr4	128483874	128484378
h3k4me1.q.05_peak_72785	chr3	132863796	132865423
h3k4me1.q.05_peak_34059	chr14	54058822	54061963
h3k4me1.q.05_peak_110726	chr9	57562882	57563707
h3k4me1.q.05_peak_9924	chr10	33723815	33724181
h3k4me1.q.05_peak_15111	chr11	8699349	8699930
h3k4me1.q.05_peak_88797	chr5	146819061	146819452
h3k4me1.q.05_peak_51698	chr18	28308313	28308995
h3k4me1.q.05_peak_60767	chr2	58540072	58540481
h3k4me1.q.05_peak_97625	chr7	63553762	63554935
h3k4me1.q.05_peak_11044	chr10	59628323	59629366
h3k4me1.q.05_peak_82209	chr5	16104665	16106991
h3k4me1.q.05_peak_92036	chr6	72163810	72164261
h3k4me1.q.05_peak_57093	chr19	47657626	47657989
h3k4me1.q.05_peak_4050	chr1	95448881	95449833
h3k4me1.q.05_peak_48884	chr17	56495925	56496467
h3k4me1.q.05_peak_40087	chr15	73727313	73727593
h3k4me1.q.05_peak_101093	chr7	130948655	130949684
h3k4me1.q.05_peak_45438	chr16	76819365	76820739
h3k4me1.q.05_peak_46466	chr16	96911908	96912884
h3k4me1.q.05_peak_2734	chr1	71722186	71724175
h3k4me1.q.05_peak_87312	chr5	122000259	122000649
h3k4me1.q.05_peak_38725	chr15	40005666	40006039
h3k4me1.q.05_peak_35671	chr14	80643383	80643788
h3k4me1.q.05_peak_101483	chr7	136707399	136708121
h3k4me1.q.05_peak_20703	chr11	114679858	114680900
h3k4me1.q.05_peak_8857	chr10	9892044	9894255
h3k4me1.q.05_peak_43862	chr16	40930938	40932837
h3k4me1.q.05_peak_57801	chr19	59920070	59920783
h3k4me1.q.05_peak_59977	chr2	43269958	43270153
h3k4me1.q.05_peak_65343	chr2	151536353	151537388
h3k4me1.q.05_peak_86882	chr5	115533404	115534956
h3k4me1.q.05_peak_101999	chr8	4918030	4918919
h3k4me1.q.05_peak_42240	chr16	9119054	9119455
h3k4me1.q.05_peak_84874	chr5	75406947	75408902
h3k4me1.q.05_peak_42269	chr16	10357821	10358655
h3k4me1.q.05_peak_39865	chr15	68396410	68396747
h3k4me1.q.05_peak_89233	chr6	6112190	6113545
h3k4me1.q.05_peak_87212	chr5	120371063	120371883
h3k4me1.q.05_peak_38005	chr15	26392844	26393469
h3k4me1.q.05_peak_102572	chr8	15992203	15993051
h3k4me1.q.05_peak_19426	chr11	95574613	95575874
h3k4me1.q.05_peak_114616	chrX	19315258	19315567
h3k4me1.q.05_peak_106775	chr8	108699711	108700328
h3k4me1.q.05_peak_93992	chr6	108965410	108966983
h3k4me1.q.05_peak_8543	chr10	3395370	3396899
h3k4me1.q.05_peak_11234	chr10	62173158	62175196
h3k4me1.q.05_peak_11147	chr10	60807350	60808287
h3k4me1.q.05_peak_91638	chr6	56799818	56800840
h3k4me1.q.05_peak_73961	chr3	154270002	154270201
h3k4me1.q.05_peak_45295	chr16	73975441	73976398
h3k4me1.q.05_peak_37441	chr15	7125044	7125356
h3k4me1.q.05_peak_18672	chr11	82646584	82647058
h3k4me1.q.05_peak_33589	chr14	35373893	35375467
h3k4me1.q.05_peak_52768	chr18	49305528	49306643
h3k4me1.q.05_peak_98368	chr7	75558335	75558553
h3k4me1.q.05_peak_28786	chr13	48316761	48317210
h3k4me1.q.05_peak_105057	chr8	73206760	73207258
h3k4me1.q.05_peak_89382	chr6	8791292	8792386
h3k4me1.q.05_peak_62001	chr2	78591164	78591543
h3k4me1.q.05_peak_49096	chr17	63017629	63018221
h3k4me1.q.05_peak_68756	chr3	41373401	41374278
h3k4me1.q.05_peak_61342	chr2	68196520	68196783
h3k4me1.q.05_peak_104997	chr8	71679664	71680384
h3k4me1.q.05_peak_11396	chr10	66904723	66905075
h3k4me1.q.05_peak_69757	chr3	66535572	66537857
h3k4me1.q.05_peak_35238	chr14	75206291	75206744
h3k4me1.q.05_peak_30578	chr13	90839310	90839566
h3k4me1.q.05_peak_47815	chr17	29928221	29929573
h3k4me1.q.05_peak_90787	chr6	39945703	39946430
h3k4me1.q.05_peak_83441	chr5	43107029	43108859
h3k4me1.q.05_peak_1207	chr1	38496485	38497590
h3k4me1.q.05_peak_68596	chr3	38754315	38755433
h3k4me1.q.05_peak_101561	chr7	138182800	138183046
h3k4me1.q.05_peak_49038	chr17	62297366	62299269
h3k4me1.q.05_peak_77836	chr4	88295649	88295863
h3k4me1.q.05_peak_113665	chr9	113802710	113802915
h3k4me1.q.05_peak_607	chr1	23214274	23216392
h3k4me1.q.05_peak_56354	chr19	32885340	32886598
h3k4me1.q.05_peak_9369	chr10	20632014	20633120
h3k4me1.q.05_peak_64014	chr2	124638224	124638436
h3k4me1.q.05_peak_104746	chr8	67206087	67206712
h3k4me1.q.05_peak_56275	chr19	31198120	31200582
h3k4me1.q.05_peak_113547	chr9	111367906	111368306
h3k4me1.q.05_peak_95662	chr6	144773306	144774924
h3k4me1.q.05_peak_103559	chr8	36590667	36591982
h3k4me1.q.05_peak_56081	chr19	27876558	27877446
h3k4me1.q.05_peak_23590	chr12	54533308	54535067
h3k4me1.q.05_peak_45322	chr16	74280577	74284125
h3k4me1.q.05_peak_32112	chr13	117289567	117289957
h3k4me1.q.05_peak_77731	chr4	87119587	87120185
h3k4me1.q.05_peak_80907	chr4	141273204	141273547
h3k4me1.q.05_peak_64270	chr2	130018607	130019174
h3k4me1.q.05_peak_72910	chr3	135990477	135991620
h3k4me1.q.05_peak_57519	chr19	56172417	56172923
h3k4me1.q.05_peak_89408	chr6	9133913	9134401
h3k4me1.q.05_peak_84187	chr5	62819974	62821076
h3k4me1.q.05_peak_37726	chr15	13986271	13987151
h3k4me1.q.05_peak_1500	chr1	43549656	43549921
h3k4me1.q.05_peak_91779	chr6	61768709	61769051
h3k4me1.q.05_peak_35956	chr14	91888935	91889650
h3k4me1.q.05_peak_3656	chr1	88649113	88649806
h3k4me1.q.05_peak_63028	chr2	104603607	104603821
h3k4me1.q.05_peak_61502	chr2	71168069	71169541
h3k4me1.q.05_peak_58674	chr2	19148468	19149310
h3k4me1.q.05_peak_27162	chr13	17799589	17799918
h3k4me1.q.05_peak_22828	chr12	38300709	38305023
h3k4me1.q.05_peak_32897	chr14	22155290	22156428
h3k4me1.q.05_peak_70679	chr3	88133250	88133613
h3k4me1.q.05_peak_27917	chr13	32463601	32464403
h3k4me1.q.05_peak_68819	chr3	43017104	43017455
h3k4me1.q.05_peak_25128	chr12	88440076	88440561
h3k4me1.q.05_peak_38735	chr15	40277245	40277720
h3k4me1.q.05_peak_27493	chr13	24222777	24223171
h3k4me1.q.05_peak_31662	chr13	109529715	109530499
h3k4me1.q.05_peak_46212	chr16	92412219	92413484
h3k4me1.q.05_peak_106759	chr8	108433100	108433946
h3k4me1.q.05_peak_112611	chr9	95088718	95090471
h3k4me1.q.05_peak_41812	chr15	100951603	100953442
h3k4me1.q.05_peak_37071	chr14	119520937	119521405
h3k4me1.q.05_peak_38691	chr15	39694665	39695085
h3k4me1.q.05_peak_87847	chr5	131580889	131582471
h3k4me1.q.05_peak_36692	chr14	109679045	109679416
h3k4me1.q.05_peak_71492	chr3	105653625	105654168
h3k4me1.q.05_peak_41477	chr15	95373353	95374315
h3k4me1.q.05_peak_56102	chr19	28211965	28212520
h3k4me1.q.05_peak_105450	chr8	83659953	83661778
h3k4me1.q.05_peak_107174	chr8	115348571	115349116
h3k4me1.q.05_peak_56857	chr19	44646259	44646665
h3k4me1.q.05_peak_60222	chr2	48730319	48731707
h3k4me1.q.05_peak_116089	chrX	127553790	127554624
h3k4me1.q.05_peak_19172	chr11	90215726	90216284
h3k4me1.q.05_peak_56131	chr19	28476045	28476440
h3k4me1.q.05_peak_68753	chr3	41318590	41319651
h3k4me1.q.05_peak_31558	chr13	107903266	107904547
h3k4me1.q.05_peak_13816	chr10	111526279	111527644
h3k4me1.q.05_peak_10027	chr10	37422758	37423343
h3k4me1.q.05_peak_69220	chr3	53682464	53682987
h3k4me1.q.05_peak_29822	chr13	70475229	70475817
h3k4me1.q.05_peak_111729	chr9	72833723	72834940
h3k4me1.q.05_peak_114181	chr9	122725311	122725800
h3k4me1.q.05_peak_53097	chr18	55768814	55769322
h3k4me1.q.05_peak_5746	chr1	143338223	143340002
h3k4me1.q.05_peak_98771	chr7	82479070	82480340
h3k4me1.q.05_peak_746	chr1	25621565	25621877
h3k4me1.q.05_peak_14492	chr10	123437359	123437987
h3k4me1.q.05_peak_56390	chr19	34597988	34598762
h3k4me1.q.05_peak_108949	chr9	27269388	27269828
h3k4me1.q.05_peak_50129	chr17	83050149	83051755
h3k4me1.q.05_peak_10968	chr10	58650780	58653287
h3k4me1.q.05_peak_12688	chr10	90971837	90973461
h3k4me1.q.05_peak_91183	chr6	50933512	50933965
h3k4me1.q.05_peak_20079	chr11	106364908	106365207
h3k4me1.q.05_peak_62037	chr2	79145463	79147166
h3k4me1.q.05_peak_4034	chr1	94747234	94747629
h3k4me1.q.05_peak_81614	chr4	154236277	154237978
h3k4me1.q.05_peak_6021	chr1	152286528	152287023
h3k4me1.q.05_peak_72789	chr3	132907224	132908169
h3k4me1.q.05_peak_10505	chr10	45083931	45085360
h3k4me1.q.05_peak_6963	chr1	167943113	167943355
h3k4me1.q.05_peak_42979	chr16	25871388	25872308
h3k4me1.q.05_peak_35404	chr14	76885100	76888356
h3k4me1.q.05_peak_2224	chr1	61647955	61649830
h3k4me1.q.05_peak_44374	chr16	50612925	50613517
h3k4me1.q.05_peak_16250	chr11	35350319	35351810
h3k4me1.q.05_peak_80625	chr4	137916734	137920929
h3k4me1.q.05_peak_27481	chr13	24122782	24124272
h3k4me1.q.05_peak_8349	chr1	192799239	192799800
h3k4me1.q.05_peak_36697	chr14	109958505	109958763
h3k4me1.q.05_peak_54875	chr18	89403836	89404552
h3k4me1.q.05_peak_51372	chr18	21320132	21321089
h3k4me1.q.05_peak_4288	chr1	106235506	106236207
h3k4me1.q.05_peak_3616	chr1	87253070	87254121
h3k4me1.q.05_peak_115007	chrX	52096754	52097334
h3k4me1.q.05_peak_89217	chr6	5929440	5931461
h3k4me1.q.05_peak_7132	chr1	170436103	170437661
h3k4me1.q.05_peak_21853	chr12	14729866	14731342
h3k4me1.q.05_peak_54861	chr18	88960427	88962233
h3k4me1.q.05_peak_88821	chr5	147154363	147156415
h3k4me1.q.05_peak_81865	chr5	4886564	4887158
h3k4me1.q.05_peak_16729	chr11	43807424	43808455
h3k4me1.q.05_peak_6942	chr1	167699880	167700240
h3k4me1.q.05_peak_20355	chr11	110439062	110439491
h3k4me1.q.05_peak_37888	chr15	24108832	24110643
h3k4me1.q.05_peak_71975	chr3	117440889	117441996
h3k4me1.q.05_peak_72598	chr3	129396688	129397747
h3k4me1.q.05_peak_40309	chr15	77257222	77259076
h3k4me1.q.05_peak_70703	chr3	88407334	88407665
h3k4me1.q.05_peak_9812	chr10	29917894	29918526
h3k4me1.q.05_peak_25275	chr12	91551061	91553026
h3k4me1.q.05_peak_23931	chr12	68216078	68218504
h3k4me1.q.05_peak_59008	chr2	27304619	27304986
h3k4me1.q.05_peak_64785	chr2	139707753	139708282
h3k4me1.q.05_peak_63169	chr2	106740594	106740793
h3k4me1.q.05_peak_35705	chr14	82002748	82003576
h3k4me1.q.05_peak_17718	chr11	65918840	65919397
h3k4me1.q.05_peak_76780	chr4	64923539	64924114
h3k4me1.q.05_peak_114499	chrX	12644414	12646548
h3k4me1.q.05_peak_39678	chr15	64187803	64188763
h3k4me1.q.05_peak_25938	chr12	104845231	104846118
h3k4me1.q.05_peak_109034	chr9	28422912	28423740
h3k4me1.q.05_peak_92282	chr6	78119101	78120333
h3k4me1.q.05_peak_36301	chr14	100107937	100108561
h3k4me1.q.05_peak_103213	chr8	31926802	31927856
h3k4me1.q.05_peak_35177	chr14	73483679	73484329
h3k4me1.q.05_peak_46192	chr16	92117458	92117801
h3k4me1.q.05_peak_91327	chr6	52828489	52830545
h3k4me1.q.05_peak_65195	chr2	146763336	146765656
h3k4me1.q.05_peak_35198	chr14	74269241	74269444
h3k4me1.q.05_peak_42289	chr16	10657616	10657976
h3k4me1.q.05_peak_12944	chr10	94426398	94427022
h3k4me1.q.05_peak_3472	chr1	83745428	83746772
h3k4me1.q.05_peak_51713	chr18	29056425	29056977
h3k4me1.q.05_peak_36087	chr14	95303126	95304714
h3k4me1.q.05_peak_39637	chr15	63520250	63520566
h3k4me1.q.05_peak_68606	chr3	38897261	38897775
h3k4me1.q.05_peak_37328	chr14	123841561	123841928
h3k4me1.q.05_peak_115818	chrX	99607795	99611169
h3k4me1.q.05_peak_88101	chr5	133982960	133984973
h3k4me1.q.05_peak_59870	chr2	39602422	39603070
h3k4me1.q.05_peak_36396	chr14	101776439	101777594
h3k4me1.q.05_peak_34185	chr14	55729966	55731206
h3k4me1.q.05_peak_73248	chr3	141973093	141973546
h3k4me1.q.05_peak_48226	chr17	40371990	40372305
h3k4me1.q.05_peak_26603	chr12	117148945	117149509
h3k4me1.q.05_peak_58210	chr2	7252782	7253241
h3k4me1.q.05_peak_78180	chr4	97132166	97133190
h3k4me1.q.05_peak_35199	chr14	74277708	74278665
h3k4me1.q.05_peak_74569	chr4	12387455	12388259
h3k4me1.q.05_peak_99983	chr7	110773278	110774695
h3k4me1.q.05_peak_102310	chr8	11278594	11278833
h3k4me1.q.05_peak_16825	chr11	45642739	45644410
h3k4me1.q.05_peak_44159	chr16	45798726	45801018
h3k4me1.q.05_peak_99001	chr7	90054759	90055584
h3k4me1.q.05_peak_105917	chr8	91170599	91172218
h3k4me1.q.05_peak_83588	chr5	46006182	46006994
h3k4me1.q.05_peak_92655	chr6	87586399	87588349
h3k4me1.q.05_peak_77107	chr4	75234444	75235576
h3k4me1.q.05_peak_5593	chr1	138214374	138215379
h3k4me1.q.05_peak_73383	chr3	144394577	144395246
h3k4me1.q.05_peak_27846	chr13	30831994	30832384
h3k4me1.q.05_peak_10308	chr10	42271337	42272166
h3k4me1.q.05_peak_82218	chr5	16187142	16187975
h3k4me1.q.05_peak_39198	chr15	54252518	54253802
h3k4me1.q.05_peak_76013	chr4	47340603	47343164
h3k4me1.q.05_peak_45743	chr16	85011559	85012156
h3k4me1.q.05_peak_15426	chr11	19272732	19272972
h3k4me1.q.05_peak_10028	chr10	37424197	37424691
h3k4me1.q.05_peak_56738	chr19	42325886	42326253
h3k4me1.q.05_peak_63294	chr2	110268941	110269586
h3k4me1.q.05_peak_91414	chr6	53713324	53714003
h3k4me1.q.05_peak_20687	chr11	114471931	114473310
h3k4me1.q.05_peak_68575	chr3	38440598	38441667
h3k4me1.q.05_peak_44860	chr16	63798121	63799061
h3k4me1.q.05_peak_108003	chr8	127229476	127230645
h3k4me1.q.05_peak_39866	chr15	68416906	68418241
h3k4me1.q.05_peak_330	chr1	14868480	14870800
h3k4me1.q.05_peak_106850	chr8	110033890	110034531
h3k4me1.q.05_peak_91692	chr6	59408573	59409977
h3k4me1.q.05_peak_111544	chr9	69114266	69116070
h3k4me1.q.05_peak_62307	chr2	90515114	90515453
h3k4me1.q.05_peak_27219	chr13	19024601	19024884
h3k4me1.q.05_peak_52979	chr18	54631696	54632566
h3k4me1.q.05_peak_86598	chr5	112119301	112119618
h3k4me1.q.05_peak_60790	chr2	58783180	58784430
[truncated: 64,645 more rows]

## Sheet: PFC_All_Active_Enhancer
PeakID	Chr	Start	End
wt_h3k4me1.q.05_peak_8737	chr1	164681336	164685937
wt_h3k4me1.q.05_peak_75527	chr2	106745892	106748315
wt_h3k4me1.q.05_peak_94273	chr4	120124942	120128837
wt_h3k4me1.q.05_peak_49868	chr15	81890723	81892632
wt_h3k4me1.q.05_peak_19223	chr11	20023213	20025075
wt_h3k4me1.q.05_peak_116014	chr7	80071373	80073368
wt_h3k4me1.q.05_peak_42968	chr14	70020690	70022941
wt_h3k4me1.q.05_peak_35672	chr13	55310616	55313340
wt_h3k4me1.q.05_peak_99925	chr5	64601154	64602401
wt_h3k4me1.q.05_peak_21772	chr11	60553679	60554464
wt_h3k4me1.q.05_peak_131522	chr9	94582268	94582865
wt_h3k4me1.q.05_peak_125469	chr8	117469767	117471238
wt_h3k4me1.q.05_peak_1858	chr1	39231333	39233058
wt_h3k4me1.q.05_peak_107575	chr6	50461327	50462633
wt_h3k4me1.q.05_peak_27310	chr12	28237576	28238606
wt_h3k4me1.q.05_peak_43210	chr14	74112421	74114335
wt_h3k4me1.q.05_peak_117721	chr7	114037170	114037678
wt_h3k4me1.q.05_peak_99503	chr5	53150367	53150910
wt_h3k4me1.q.05_peak_93277	chr4	102533218	102535741
wt_h3k4me1.q.05_peak_100444	chr5	73399801	73400776
wt_h3k4me1.q.05_peak_48618	chr15	66313902	66315381
wt_h3k4me1.q.05_peak_88148	chr3	155360126	155361292
wt_h3k4me1.q.05_peak_30390	chr12	83931559	83932938
wt_h3k4me1.q.05_peak_73311	chr2	67656601	67658151
wt_h3k4me1.q.05_peak_131727	chr9	97427664	97428888
wt_h3k4me1.q.05_peak_44321	chr14	102934592	102935885
wt_h3k4me1.q.05_peak_73469	chr2	69445677	69447037
wt_h3k4me1.q.05_peak_43025	chr14	70538265	70538998
wt_h3k4me1.q.05_peak_87005	chr3	136967079	136968104
wt_h3k4me1.q.05_peak_90737	chr4	49664343	49665534
wt_h3k4me1.q.05_peak_117888	chr7	117432568	117435143
wt_h3k4me1.q.05_peak_123916	chr8	88222261	88223342
wt_h3k4me1.q.05_peak_68811	chr19	47526595	47527947
wt_h3k4me1.q.05_peak_111956	chr6	122539349	122540381
wt_h3k4me1.q.05_peak_24541	chr11	102220413	102221669
wt_h3k4me1.q.05_peak_116827	chr7	96683807	96685679
wt_h3k4me1.q.05_peak_81946	chr3	41443637	41445005
wt_h3k4me1.q.05_peak_107086	chr6	39969756	39971732
wt_h3k4me1.q.05_peak_65712	chr18	77308442	77309570
wt_h3k4me1.q.05_peak_136228	chrX	166290679	166291935
wt_h3k4me1.q.05_peak_100172	chr5	67732108	67733071
wt_h3k4me1.q.05_peak_6076	chr1	123957509	123958102
wt_h3k4me1.q.05_peak_42954	chr14	69942952	69944821
wt_h3k4me1.q.05_peak_17113	chr10	109722230	109722630
wt_h3k4me1.q.05_peak_95564	chr4	138548045	138548862
wt_h3k4me1.q.05_peak_93758	chr4	108632759	108633043
wt_h3k4me1.q.05_peak_12895	chr10	39674044	39674972
wt_h3k4me1.q.05_peak_10557	chr1	191952203	191953931
wt_h3k4me1.q.05_peak_110637	chr6	104915658	104917958
wt_h3k4me1.q.05_peak_105542	chr6	14408416	14410813
wt_h3k4me1.q.05_peak_122765	chr8	68908099	68909059
wt_h3k4me1.q.05_peak_55340	chr16	74432051	74434240
wt_h3k4me1.q.05_peak_27710	chr12	32985896	32986923
wt_h3k4me1.q.05_peak_3301	chr1	63967859	63968680
wt_h3k4me1.q.05_peak_128643	chr9	44838327	44839054
wt_h3k4me1.q.05_peak_109816	chr6	92597984	92598729
wt_h3k4me1.q.05_peak_80149	chr2	180205172	180206515
wt_h3k4me1.q.05_peak_47976	chr15	55693918	55695791
wt_h3k4me1.q.05_peak_2522	chr1	52578054	52579358
wt_h3k4me1.q.05_peak_32174	chr12	111797192	111797848
wt_h3k4me1.q.05_peak_18067	chr10	123548087	123548868
wt_h3k4me1.q.05_peak_94717	chr4	127634866	127636311
wt_h3k4me1.q.05_peak_50185	chr15	85493461	85495715
wt_h3k4me1.q.05_peak_128792	chr9	46599509	46601354
wt_h3k4me1.q.05_peak_59998	chr17	74508250	74508873
wt_h3k4me1.q.05_peak_50996	chr15	97780335	97780694
wt_h3k4me1.q.05_peak_127196	chr9	25134134	25134447
wt_h3k4me1.q.05_peak_92937	chr4	97831231	97833151
wt_h3k4me1.q.05_peak_51964	chr16	9798013	9798652
wt_h3k4me1.q.05_peak_89078	chr4	15012069	15013596
wt_h3k4me1.q.05_peak_133919	chrX	15006591	15007491
wt_h3k4me1.q.05_peak_69682	chr2	5352378	5352986
wt_h3k4me1.q.05_peak_1310	chr1	32502700	32503347
wt_h3k4me1.q.05_peak_128060	chr9	36924855	36925642
wt_h3k4me1.q.05_peak_61123	chr18	4439886	4441204
wt_h3k4me1.q.05_peak_812	chr1	22274651	22275265
wt_h3k4me1.q.05_peak_103980	chr5	132649439	132650394
wt_h3k4me1.q.05_peak_45531	chr15	7956615	7957800
wt_h3k4me1.q.05_peak_24718	chr11	104217915	104218217
wt_h3k4me1.q.05_peak_116326	chr7	87716111	87717549
wt_h3k4me1.q.05_peak_72685	chr2	58497027	58498049
wt_h3k4me1.q.05_peak_71757	chr2	37945595	37946714
wt_h3k4me1.q.05_peak_49475	chr15	77931275	77932261
wt_h3k4me1.q.05_peak_94622	chr4	126123081	126124652
wt_h3k4me1.q.05_peak_26442	chr12	7227718	7229812
wt_h3k4me1.q.05_peak_40603	chr14	25850493	25853463
wt_h3k4me1.q.05_peak_125429	chr8	117314093	117315092
wt_h3k4me1.q.05_peak_15376	chr10	82634189	82634581
wt_h3k4me1.q.05_peak_77455	chr2	136667195	136667614
wt_h3k4me1.q.05_peak_67738	chr19	28799924	28801086
wt_h3k4me1.q.05_peak_44410	chr14	103764357	103764662
wt_h3k4me1.q.05_peak_34718	chr13	43193064	43193426
wt_h3k4me1.q.05_peak_98042	chr5	28366215	28367670
wt_h3k4me1.q.05_peak_60660	chr17	86366229	86367983
wt_h3k4me1.q.05_peak_36144	chr13	62940229	62941604
wt_h3k4me1.q.05_peak_47032	chr15	37568477	37571358
wt_h3k4me1.q.05_peak_136307	chrX	167598167	167598483
wt_h3k4me1.q.05_peak_11394	chr10	11660988	11661880
wt_h3k4me1.q.05_peak_115118	chr7	63583039	63585023
wt_h3k4me1.q.05_peak_100171	chr5	67725270	67728085
wt_h3k4me1.q.05_peak_66153	chr18	83765018	83768275
wt_h3k4me1.q.05_peak_132111	chr9	103429163	103429598
wt_h3k4me1.q.05_peak_6655	chr1	132510087	132510435
wt_h3k4me1.q.05_peak_49827	chr15	81272348	81273252
wt_h3k4me1.q.05_peak_59626	chr17	69205052	69206752
wt_h3k4me1.q.05_peak_125445	chr8	117369904	117370223
wt_h3k4me1.q.05_peak_120944	chr8	31068628	31070394
wt_h3k4me1.q.05_peak_30309	chr12	82970460	82972034
wt_h3k4me1.q.05_peak_76557	chr2	124270302	124272159
wt_h3k4me1.q.05_peak_6990	chr1	135703349	135704006
wt_h3k4me1.q.05_peak_96248	chr4	150606297	150607122
wt_h3k4me1.q.05_peak_109311	chr6	86874820	86875166
wt_h3k4me1.q.05_peak_108507	chr6	70880766	70881049
wt_h3k4me1.q.05_peak_6538	chr1	131349775	131352456
wt_h3k4me1.q.05_peak_14838	chr10	75016207	75018330
wt_h3k4me1.q.05_peak_68204	chr19	37254902	37255428
wt_h3k4me1.q.05_peak_2189	chr1	43773163	43773734
wt_h3k4me1.q.05_peak_133186	chr9	118989278	118993152
wt_h3k4me1.q.05_peak_67277	chr19	21785270	21785897
wt_h3k4me1.q.05_peak_23637	chr11	87978822	87979387
wt_h3k4me1.q.05_peak_4317	chr1	81178029	81181678
wt_h3k4me1.q.05_peak_82024	chr3	42907283	42908831
wt_h3k4me1.q.05_peak_85285	chr3	105545823	105547241
wt_h3k4me1.q.05_peak_59704	chr17	70436832	70439259
wt_h3k4me1.q.05_peak_11768	chr10	18481712	18483730
wt_h3k4me1.q.05_peak_42065	chr14	56288229	56288970
wt_h3k4me1.q.05_peak_103218	chr5	122652018	122654717
wt_h3k4me1.q.05_peak_119690	chr8	9568813	9570260
wt_h3k4me1.q.05_peak_26985	chr12	17163660	17164602
wt_h3k4me1.q.05_peak_42672	chr14	65085677	65092788
wt_h3k4me1.q.05_peak_38147	chr13	101728818	101729256
wt_h3k4me1.q.05_peak_46988	chr15	37040378	37041486
wt_h3k4me1.q.05_peak_119863	chr8	11421394	11423047
wt_h3k4me1.q.05_peak_38492	chr13	107051129	107052218
wt_h3k4me1.q.05_peak_64794	chr18	64927708	64928256
wt_h3k4me1.q.05_peak_63429	chr18	42743965	42745749
wt_h3k4me1.q.05_peak_22471	chr11	71779204	71782373
wt_h3k4me1.q.05_peak_20866	chr11	46913086	46913893
wt_h3k4me1.q.05_peak_16807	chr10	106818144	106819727
wt_h3k4me1.q.05_peak_61372	chr18	9629254	9630856
wt_h3k4me1.q.05_peak_132292	chr9	105684192	105685648
wt_h3k4me1.q.05_peak_129573	chr9	57866165	57867117
wt_h3k4me1.q.05_peak_30451	chr12	85132753	85133133
wt_h3k4me1.q.05_peak_10110	chr1	183149493	183152680
wt_h3k4me1.q.05_peak_89020	chr4	13863485	13864508
wt_h3k4me1.q.05_peak_42031	chr14	55372947	55373552
wt_h3k4me1.q.05_peak_23916	chr11	93569266	93572958
wt_h3k4me1.q.05_peak_2611	chr1	53978818	53979403
wt_h3k4me1.q.05_peak_94720	chr4	127659520	127660700
wt_h3k4me1.q.05_peak_104691	chr5	144935155	144937526
wt_h3k4me1.q.05_peak_35893	chr13	58064629	58067542
wt_h3k4me1.q.05_peak_17315	chr10	111393960	111394911
wt_h3k4me1.q.05_peak_49181	chr15	73976658	73978840
wt_h3k4me1.q.05_peak_127188	chr9	25074764	25076409
wt_h3k4me1.q.05_peak_80945	chr3	23137074	23139085
wt_h3k4me1.q.05_peak_63147	chr18	39164756	39165780
wt_h3k4me1.q.05_peak_48647	chr15	66586631	66587867
wt_h3k4me1.q.05_peak_49431	chr15	77216426	77221614
wt_h3k4me1.q.05_peak_121814	chr8	46862713	46863045
wt_h3k4me1.q.05_peak_15506	chr10	84409122	84418093
wt_h3k4me1.q.05_peak_17221	chr10	110420671	110421097
wt_h3k4me1.q.05_peak_71762	chr2	37984495	37986844
wt_h3k4me1.q.05_peak_8580	chr1	162107165	162110050
wt_h3k4me1.q.05_peak_36458	chr13	70736186	70737234
wt_h3k4me1.q.05_peak_136185	chrX	164417385	164417914
wt_h3k4me1.q.05_peak_12243	chr10	25641948	25644520
wt_h3k4me1.q.05_peak_22398	chr11	70682175	70682891
wt_h3k4me1.q.05_peak_4065	chr1	77402293	77403286
wt_h3k4me1.q.05_peak_69884	chr2	6909755	6911395
wt_h3k4me1.q.05_peak_17602	chr10	116956168	116958373
wt_h3k4me1.q.05_peak_97992	chr5	27531729	27532664
wt_h3k4me1.q.05_peak_15330	chr10	81145569	81146446
wt_h3k4me1.q.05_peak_62126	chr18	23854130	23854978
wt_h3k4me1.q.05_peak_14563	chr10	70165412	70166770
wt_h3k4me1.q.05_peak_79896	chr2	173730278	173730847
wt_h3k4me1.q.05_peak_50434	chr15	89106371	89107628
wt_h3k4me1.q.05_peak_96085	chr4	149264823	149265790
wt_h3k4me1.q.05_peak_14361	chr10	67962331	67962986
wt_h3k4me1.q.05_peak_89861	chr4	34528169	34529324
wt_h3k4me1.q.05_peak_97605	chr5	21685976	21688248
wt_h3k4me1.q.05_peak_53061	chr16	28840599	28841639
wt_h3k4me1.q.05_peak_32757	chr13	7993125	7995131
wt_h3k4me1.q.05_peak_121583	chr8	41858455	41859511
wt_h3k4me1.q.05_peak_106323	chr6	30907335	30908808
wt_h3k4me1.q.05_peak_85025	chr3	101859762	101860844
wt_h3k4me1.q.05_peak_66004	chr18	81152541	81153441
wt_h3k4me1.q.05_peak_87117	chr3	138625366	138627955
wt_h3k4me1.q.05_peak_33313	chr13	17887619	17888139
wt_h3k4me1.q.05_peak_29399	chr12	70374343	70374719
wt_h3k4me1.q.05_peak_122361	chr8	61372535	61373977
wt_h3k4me1.q.05_peak_87019	chr3	137209316	137209830
wt_h3k4me1.q.05_peak_30688	chr12	88775803	88776194
wt_h3k4me1.q.05_peak_83166	chr3	68367362	68369978
wt_h3k4me1.q.05_peak_25669	chr11	117133830	117134716
wt_h3k4me1.q.05_peak_26022	chr11	119991034	119991988
wt_h3k4me1.q.05_peak_84057	chr3	85184274	85190106
wt_h3k4me1.q.05_peak_134171	chrX	41312381	41312698
wt_h3k4me1.q.05_peak_90406	chr4	46081127	46081850
wt_h3k4me1.q.05_peak_97795	chr5	24483609	24487427
wt_h3k4me1.q.05_peak_107646	chr6	51732211	51732719
wt_h3k4me1.q.05_peak_121682	chr8	45533748	45536090
wt_h3k4me1.q.05_peak_88181	chr3	156577095	156577381
wt_h3k4me1.q.05_peak_90060	chr4	40502481	40503373
wt_h3k4me1.q.05_peak_74751	chr2	92819300	92820317
wt_h3k4me1.q.05_peak_129685	chr9	59096888	59098022
wt_h3k4me1.q.05_peak_109600	chr6	90711562	90713784
wt_h3k4me1.q.05_peak_88149	chr3	155381229	155383794
wt_h3k4me1.q.05_peak_44271	chr14	101864579	101865325
wt_h3k4me1.q.05_peak_128617	chr9	44493130	44493787
wt_h3k4me1.q.05_peak_130166	chr9	65972022	65973805
wt_h3k4me1.q.05_peak_109312	chr6	86878973	86880716
wt_h3k4me1.q.05_peak_23862	chr11	93039316	93041236
wt_h3k4me1.q.05_peak_39858	chr14	16738280	16742928
wt_h3k4me1.q.05_peak_123967	chr8	89396437	89397038
wt_h3k4me1.q.05_peak_77156	chr2	132753010	132754220
wt_h3k4me1.q.05_peak_109840	chr6	92728257	92728916
wt_h3k4me1.q.05_peak_50947	chr15	96681979	96682319
wt_h3k4me1.q.05_peak_112120	chr6	126584349	126587261
wt_h3k4me1.q.05_peak_130170	chr9	66037872	66041951
wt_h3k4me1.q.05_peak_19382	chr11	22124714	22125944
wt_h3k4me1.q.05_peak_82103	chr3	49609767	49610529
wt_h3k4me1.q.05_peak_27122	chr12	25027583	25027905
wt_h3k4me1.q.05_peak_85208	chr3	104617739	104618812
wt_h3k4me1.q.05_peak_80994	chr3	25426355	25427489
wt_h3k4me1.q.05_peak_39897	chr14	17721964	17723717
wt_h3k4me1.q.05_peak_66858	chr19	10804902	10806341
wt_h3k4me1.q.05_peak_178	chr1	8582600	8584360
wt_h3k4me1.q.05_peak_55289	chr16	73784045	73785124
wt_h3k4me1.q.05_peak_55527	chr16	77698224	77699033
wt_h3k4me1.q.05_peak_117137	chr7	100561422	100562705
wt_h3k4me1.q.05_peak_26314	chr12	5154768	5158185
wt_h3k4me1.q.05_peak_106396	chr6	31313714	31314786
wt_h3k4me1.q.05_peak_23781	chr11	90331837	90333094
wt_h3k4me1.q.05_peak_111330	chr6	114414093	114415066
wt_h3k4me1.q.05_peak_112839	chr6	139294977	139297947
wt_h3k4me1.q.05_peak_34669	chr13	42973318	42975113
wt_h3k4me1.q.05_peak_135475	chrX	134619720	134621030
wt_h3k4me1.q.05_peak_12374	chr10	27487834	27489117
wt_h3k4me1.q.05_peak_14173	chr10	64216221	64217211
wt_h3k4me1.q.05_peak_2665	chr1	54186674	54186935
wt_h3k4me1.q.05_peak_75843	chr2	113385362	113385709
wt_h3k4me1.q.05_peak_72267	chr2	49718198	49721898
wt_h3k4me1.q.05_peak_68691	chr19	46215508	46216594
wt_h3k4me1.q.05_peak_79733	chr2	170550178	170551174
wt_h3k4me1.q.05_peak_112917	chr6	140476634	140481534
wt_h3k4me1.q.05_peak_67430	chr19	23862553	23869241
wt_h3k4me1.q.05_peak_53659	chr16	35405148	35406159
wt_h3k4me1.q.05_peak_94940	chr4	130012978	130015076
wt_h3k4me1.q.05_peak_80695	chr3	17824022	17824347
wt_h3k4me1.q.05_peak_111982	chr6	122832605	122833503
wt_h3k4me1.q.05_peak_6544	chr1	131406534	131407732
wt_h3k4me1.q.05_peak_101887	chr5	104058823	104059423
wt_h3k4me1.q.05_peak_21110	chr11	51401385	51402108
wt_h3k4me1.q.05_peak_52905	chr16	25585716	25588904
wt_h3k4me1.q.05_peak_37047	chr13	84255510	84255848
wt_h3k4me1.q.05_peak_17535	chr10	116264403	116265378
wt_h3k4me1.q.05_peak_132343	chr9	106331252	106332484
wt_h3k4me1.q.05_peak_49881	chr15	82090540	82091864
wt_h3k4me1.q.05_peak_120632	chr8	23915976	23917161
wt_h3k4me1.q.05_peak_124858	chr8	106838727	106840751
wt_h3k4me1.q.05_peak_81231	chr3	28434787	28437714
wt_h3k4me1.q.05_peak_86210	chr3	122766388	122768561
wt_h3k4me1.q.05_peak_101713	chr5	101782794	101784143
wt_h3k4me1.q.05_peak_127418	chr9	27923798	27925305
wt_h3k4me1.q.05_peak_105358	chr6	8769867	8772514
wt_h3k4me1.q.05_peak_127968	chr9	34908087	34909983
wt_h3k4me1.q.05_peak_132911	chr9	113470956	113471811
wt_h3k4me1.q.05_peak_101910	chr5	104338702	104340243
wt_h3k4me1.q.05_peak_110251	chr6	99383086	99385245
wt_h3k4me1.q.05_peak_109804	chr6	92541476	92543505
wt_h3k4me1.q.05_peak_1872	chr1	39335940	39340555
wt_h3k4me1.q.05_peak_34493	chr13	41583518	41584224
wt_h3k4me1.q.05_peak_16577	chr10	100281469	100283374
wt_h3k4me1.q.05_peak_57922	chr17	30378029	30379247
wt_h3k4me1.q.05_peak_95207	chr4	133613885	133615680
wt_h3k4me1.q.05_peak_17114	chr10	109737390	109737811
wt_h3k4me1.q.05_peak_29412	chr12	70543120	70545630
wt_h3k4me1.q.05_peak_33679	chr13	24253030	24254383
wt_h3k4me1.q.05_peak_103326	chr5	124192250	124193592
wt_h3k4me1.q.05_peak_12089	chr10	23104453	23105562
wt_h3k4me1.q.05_peak_104084	chr5	135044535	135045013
wt_h3k4me1.q.05_peak_42529	chr14	63919579	63920614
wt_h3k4me1.q.05_peak_107208	chr6	41864063	41864614
wt_h3k4me1.q.05_peak_122203	chr8	57791627	57793602
wt_h3k4me1.q.05_peak_51856	chr16	8595440	8597153
wt_h3k4me1.q.05_peak_47315	chr15	41489368	41490658
wt_h3k4me1.q.05_peak_50803	chr15	94769911	94771009
wt_h3k4me1.q.05_peak_101535	chr5	99273446	99274824
wt_h3k4me1.q.05_peak_124567	chr8	102662836	102663486
wt_h3k4me1.q.05_peak_114805	chr7	51912619	51914444
wt_h3k4me1.q.05_peak_117892	chr7	117464392	117465328
wt_h3k4me1.q.05_peak_49701	chr15	80201328	80203438
wt_h3k4me1.q.05_peak_2354	chr1	50964568	50965660
wt_h3k4me1.q.05_peak_86866	chr3	135555959	135557242
wt_h3k4me1.q.05_peak_1187	chr1	28218231	28219003
wt_h3k4me1.q.05_peak_43163	chr14	73308694	73309146
wt_h3k4me1.q.05_peak_62778	chr18	34456383	34458737
wt_h3k4me1.q.05_peak_39337	chr14	8061054	8063640
wt_h3k4me1.q.05_peak_90458	chr4	46750333	46754376
wt_h3k4me1.q.05_peak_29536	chr12	71937672	71938898
wt_h3k4me1.q.05_peak_58456	chr17	46272942	46275257
wt_h3k4me1.q.05_peak_71034	chr2	28303251	28304354
wt_h3k4me1.q.05_peak_48662	chr15	66823917	66827123
wt_h3k4me1.q.05_peak_36067	chr13	59887601	59888345
wt_h3k4me1.q.05_peak_56336	chr16	94910620	94912022
wt_h3k4me1.q.05_peak_2377	chr1	51117578	51118832
wt_h3k4me1.q.05_peak_21191	chr11	52535463	52538404
wt_h3k4me1.q.05_peak_28758	chr12	53094680	53096068
wt_h3k4me1.q.05_peak_30673	chr12	88707654	88709544
wt_h3k4me1.q.05_peak_30328	chr12	83194648	83195532
wt_h3k4me1.q.05_peak_133140	chr9	118378975	118379756
wt_h3k4me1.q.05_peak_127018	chr9	21494068	21495417
wt_h3k4me1.q.05_peak_59512	chr17	67007332	67007910
wt_h3k4me1.q.05_peak_92381	chr4	85328500	85328869
wt_h3k4me1.q.05_peak_16929	chr10	108527968	108529050
wt_h3k4me1.q.05_peak_12388	chr10	27841012	27841782
wt_h3k4me1.q.05_peak_48731	chr15	67898728	67901821
wt_h3k4me1.q.05_peak_108082	chr6	57812853	57816058
wt_h3k4me1.q.05_peak_80933	chr3	22815296	22816378
wt_h3k4me1.q.05_peak_35193	chr13	48948704	48950460
wt_h3k4me1.q.05_peak_102763	chr5	116827432	116828653
wt_h3k4me1.q.05_peak_58508	chr17	46931747	46932845
wt_h3k4me1.q.05_peak_104420	chr5	140688472	140689173
wt_h3k4me1.q.05_peak_58335	chr17	44622783	44624328
wt_h3k4me1.q.05_peak_83409	chr3	75296308	75298359
wt_h3k4me1.q.05_peak_52281	chr16	14215112	14215613
wt_h3k4me1.q.05_peak_70936	chr2	27336315	27337348
wt_h3k4me1.q.05_peak_13051	chr10	41227140	41228285
wt_h3k4me1.q.05_peak_50168	chr15	85365750	85367703
wt_h3k4me1.q.05_peak_71539	chr2	34461671	34463070
wt_h3k4me1.q.05_peak_44360	chr14	103333056	103336901
wt_h3k4me1.q.05_peak_7451	chr1	144883018	144884237
wt_h3k4me1.q.05_peak_13186	chr10	43033719	43035496
wt_h3k4me1.q.05_peak_96484	chr4	153327339	153328819
wt_h3k4me1.q.05_peak_83935	chr3	83984389	83984853
wt_h3k4me1.q.05_peak_33300	chr13	17783755	17785332
wt_h3k4me1.q.05_peak_116631	chr7	92164480	92166073
wt_h3k4me1.q.05_peak_5433	chr1	100842686	100844046
wt_h3k4me1.q.05_peak_79767	chr2	170811134	170812009
wt_h3k4me1.q.05_peak_12193	chr10	25177778	25180398
wt_h3k4me1.q.05_peak_56976	chr17	9931748	9932289
wt_h3k4me1.q.05_peak_47043	chr15	37614565	37615548
wt_h3k4me1.q.05_peak_76209	chr2	118684246	118685560
wt_h3k4me1.q.05_peak_20784	chr11	45896274	45899140
wt_h3k4me1.q.05_peak_19038	chr11	14628290	14629213
wt_h3k4me1.q.05_peak_49435	chr15	77234743	77239365
wt_h3k4me1.q.05_peak_34600	chr13	42741939	42743008
wt_h3k4me1.q.05_peak_7161	chr1	137656660	137657969
wt_h3k4me1.q.05_peak_52257	chr16	13874727	13876130
wt_h3k4me1.q.05_peak_120171	chr8	14690538	14691025
wt_h3k4me1.q.05_peak_14503	chr10	69791568	69793422
wt_h3k4me1.q.05_peak_85634	chr3	109499572	109501205
wt_h3k4me1.q.05_peak_130210	chr9	66659267	66662767
wt_h3k4me1.q.05_peak_26151	chr12	3384269	3386531
wt_h3k4me1.q.05_peak_475	chr1	14233501	14234201
wt_h3k4me1.q.05_peak_30533	chr12	86085434	86087413
wt_h3k4me1.q.05_peak_7100	chr1	136612054	136614100
wt_h3k4me1.q.05_peak_55814	chr16	86189343	86189990
wt_h3k4me1.q.05_peak_84566	chr3	94856257	94856953
wt_h3k4me1.q.05_peak_126558	chr9	9040828	9042312
wt_h3k4me1.q.05_peak_5494	chr1	104807084	104808577
wt_h3k4me1.q.05_peak_62332	chr18	25718820	25729264
wt_h3k4me1.q.05_peak_85855	chr3	117247470	117248347
wt_h3k4me1.q.05_peak_2182	chr1	43698197	43699268
wt_h3k4me1.q.05_peak_66532	chr19	5136913	5137653
wt_h3k4me1.q.05_peak_11941	chr10	20818182	20820271
wt_h3k4me1.q.05_peak_111438	chr6	115277495	115278734
wt_h3k4me1.q.05_peak_3058	chr1	59943771	59946477
wt_h3k4me1.q.05_peak_114135	chr7	34963978	34964824
wt_h3k4me1.q.05_peak_93486	chr4	104537810	104539264
wt_h3k4me1.q.05_peak_73840	chr2	74557360	74558365
wt_h3k4me1.q.05_peak_29952	chr12	78244349	78244891
wt_h3k4me1.q.05_peak_81932	chr3	41154234	41156079
wt_h3k4me1.q.05_peak_103331	chr5	124214816	124216100
wt_h3k4me1.q.05_peak_35357	chr13	51731727	51732880
wt_h3k4me1.q.05_peak_27487	chr12	29855547	29856564
wt_h3k4me1.q.05_peak_62167	chr18	24402238	24403955
wt_h3k4me1.q.05_peak_125314	chr8	114923340	114924383
wt_h3k4me1.q.05_peak_58305	chr17	43997321	43997717
wt_h3k4me1.q.05_peak_89367	chr4	22367423	22368711
wt_h3k4me1.q.05_peak_68291	chr19	38844156	38845269
wt_h3k4me1.q.05_peak_73781	chr2	73631614	73632686
wt_h3k4me1.q.05_peak_95730	chr4	140277864	140278793
wt_h3k4me1.q.05_peak_127290	chr9	26632426	26635261
wt_h3k4me1.q.05_peak_115239	chr7	64778505	64778863
wt_h3k4me1.q.05_peak_54621	chr16	54590658	54593390
wt_h3k4me1.q.05_peak_113408	chr6	148237277	148237899
wt_h3k4me1.q.05_peak_29687	chr12	74232018	74233275
wt_h3k4me1.q.05_peak_6452	chr1	130098199	130098775
wt_h3k4me1.q.05_peak_55929	chr16	89906873	89910230
wt_h3k4me1.q.05_peak_52839	chr16	24490572	24491912
wt_h3k4me1.q.05_peak_116269	chr7	84332129	84333062
wt_h3k4me1.q.05_peak_8142	chr1	157162626	157163181
wt_h3k4me1.q.05_peak_52881	chr16	25016010	25018707
wt_h3k4me1.q.05_peak_12292	chr10	26202118	26203857
wt_h3k4me1.q.05_peak_62662	chr18	33055480	33057243
wt_h3k4me1.q.05_peak_106084	chr6	28217615	28218546
wt_h3k4me1.q.05_peak_11304	chr10	10101503	10102585
wt_h3k4me1.q.05_peak_82165	chr3	50914304	50915583
wt_h3k4me1.q.05_peak_47335	chr15	41611779	41613547
wt_h3k4me1.q.05_peak_100987	chr5	85612156	85613301
wt_h3k4me1.q.05_peak_80459	chr3	9522835	9524452
wt_h3k4me1.q.05_peak_103856	chr5	131181902	131183033
wt_h3k4me1.q.05_peak_28492	chr12	49963635	49965413
wt_h3k4me1.q.05_peak_21476	chr11	57036513	57039865
wt_h3k4me1.q.05_peak_66823	chr19	10424673	10426240
wt_h3k4me1.q.05_peak_114684	chr7	49414211	49414646
wt_h3k4me1.q.05_peak_110893	chr6	108699973	108701311
wt_h3k4me1.q.05_peak_21764	chr11	60396527	60397721
wt_h3k4me1.q.05_peak_132139	chr9	103594091	103595742
wt_h3k4me1.q.05_peak_40124	chr14	20780383	20781517
wt_h3k4me1.q.05_peak_30491	chr12	85611317	85612109
wt_h3k4me1.q.05_peak_67776	chr19	29312236	29312757
wt_h3k4me1.q.05_peak_97829	chr5	24889099	24890836
wt_h3k4me1.q.05_peak_132266	chr9	105377224	105378145
wt_h3k4me1.q.05_peak_69387	chr19	58523741	58526099
wt_h3k4me1.q.05_peak_46579	chr15	30874692	30875146
wt_h3k4me1.q.05_peak_135829	chrX	152946071	152947041
wt_h3k4me1.q.05_peak_51918	chr16	9457052	9457518
wt_h3k4me1.q.05_peak_109971	chr6	94581857	94583092
wt_h3k4me1.q.05_peak_42958	chr14	69969446	69970292
wt_h3k4me1.q.05_peak_114891	chr7	56083957	56085848
wt_h3k4me1.q.05_peak_66263	chr18	85403563	85404515
wt_h3k4me1.q.05_peak_56559	chr16	97812997	97814782
wt_h3k4me1.q.05_peak_45999	chr15	18993552	18995340
wt_h3k4me1.q.05_peak_17967	chr10	122711267	122712663
wt_h3k4me1.q.05_peak_97624	chr5	21933366	21934588
wt_h3k4me1.q.05_peak_474	chr1	14232180	14233068
wt_h3k4me1.q.05_peak_134496	chrX	61580019	61580873
wt_h3k4me1.q.05_peak_115763	chr7	75137003	75138685
wt_h3k4me1.q.05_peak_125983	chr8	123864038	123864723
wt_h3k4me1.q.05_peak_34076	chr13	33067451	33068910
wt_h3k4me1.q.05_peak_13491	chr10	52819289	52820434
wt_h3k4me1.q.05_peak_56556	chr16	97805190	97806582
wt_h3k4me1.q.05_peak_69902	chr2	7043517	7045314
wt_h3k4me1.q.05_peak_64862	chr18	65213480	65215077
wt_h3k4me1.q.05_peak_26972	chr12	17087498	17091722
wt_h3k4me1.q.05_peak_33224	chr13	15776096	15778500
wt_h3k4me1.q.05_peak_121457	chr8	39356910	39357636
wt_h3k4me1.q.05_peak_69199	chr19	56562257	56566497
wt_h3k4me1.q.05_peak_53002	chr16	28311556	28312558
wt_h3k4me1.q.05_peak_59766	chr17	70728647	70729095
wt_h3k4me1.q.05_peak_82638	chr3	56168727	56170801
wt_h3k4me1.q.05_peak_40225	chr14	21691365	21692476
wt_h3k4me1.q.05_peak_31720	chr12	106284669	106285493
wt_h3k4me1.q.05_peak_119927	chr8	12487142	12487446
wt_h3k4me1.q.05_peak_38903	chr13	111978694	111980095
wt_h3k4me1.q.05_peak_92360	chr4	85258186	85258966
wt_h3k4me1.q.05_peak_59177	chr17	62939078	62940936
wt_h3k4me1.q.05_peak_81251	chr3	28543619	28544396
wt_h3k4me1.q.05_peak_117534	chr7	111724696	111725009
wt_h3k4me1.q.05_peak_123522	chr8	83180680	83183613
wt_h3k4me1.q.05_peak_57609	chr17	26688012	26690349
wt_h3k4me1.q.05_peak_107232	chr6	42361811	42363177
wt_h3k4me1.q.05_peak_101539	chr5	99290887	99293214
wt_h3k4me1.q.05_peak_97747	chr5	24019659	24020986
wt_h3k4me1.q.05_peak_84090	chr3	85442226	85442928
wt_h3k4me1.q.05_peak_39446	chr14	9792938	9794356
wt_h3k4me1.q.05_peak_107593	chr6	50721392	50722455
wt_h3k4me1.q.05_peak_42271	chr14	60413536	60415059
wt_h3k4me1.q.05_peak_48553	chr15	65783234	65785194
wt_h3k4me1.q.05_peak_124593	chr8	102759422	102762205
wt_h3k4me1.q.05_peak_13773	chr10	58797244	58799030
wt_h3k4me1.q.05_peak_46164	chr15	25225167	25225549
wt_h3k4me1.q.05_peak_74570	chr2	91189389	91189722
wt_h3k4me1.q.05_peak_99275	chr5	49231975	49232522
wt_h3k4me1.q.05_peak_108144	chr6	59412452	59413366
wt_h3k4me1.q.05_peak_10	chr1	3292424	3293790
wt_h3k4me1.q.05_peak_121288	chr8	36143764	36144591
wt_h3k4me1.q.05_peak_114644	chr7	49272779	49276227
wt_h3k4me1.q.05_peak_124865	chr8	106916452	106916916
wt_h3k4me1.q.05_peak_120311	chr8	16686017	16687964
wt_h3k4me1.q.05_peak_126583	chr9	9547094	9549652
wt_h3k4me1.q.05_peak_61137	chr18	4602104	4605016
wt_h3k4me1.q.05_peak_70690	chr2	22764807	22765641
wt_h3k4me1.q.05_peak_57952	chr17	31027461	31029675
wt_h3k4me1.q.05_peak_87188	chr3	139047766	139051783
wt_h3k4me1.q.05_peak_51754	chr16	6954286	6956347
wt_h3k4me1.q.05_peak_4109	chr1	77548438	77548790
wt_h3k4me1.q.05_peak_89345	chr4	21971558	21973048
wt_h3k4me1.q.05_peak_24889	chr11	106177848	106178930
wt_h3k4me1.q.05_peak_55733	chr16	84989755	84991127
wt_h3k4me1.q.05_peak_94519	chr4	125020790	125021163
wt_h3k4me1.q.05_peak_79860	chr2	173229811	173230652
wt_h3k4me1.q.05_peak_110454	chr6	101359351	101361244
wt_h3k4me1.q.05_peak_8617	chr1	162434494	162435463
wt_h3k4me1.q.05_peak_42311	chr14	60988100	60988874
wt_h3k4me1.q.05_peak_75251	chr2	102724226	102725893
wt_h3k4me1.q.05_peak_61745	chr18	16560775	16562445
wt_h3k4me1.q.05_peak_95248	chr4	134431521	134432445
wt_h3k4me1.q.05_peak_63019	chr18	38049617	38050054
wt_h3k4me1.q.05_peak_103129	chr5	121821062	121823979
wt_h3k4me1.q.05_peak_102495	chr5	113397852	113398622
wt_h3k4me1.q.05_peak_71221	chr2	30796112	30797669
wt_h3k4me1.q.05_peak_132520	chr9	108170159	108172318
wt_h3k4me1.q.05_peak_60457	chr17	83542023	83542962
wt_h3k4me1.q.05_peak_105721	chr6	18441744	18449327
wt_h3k4me1.q.05_peak_105712	chr6	18409326	18410357
wt_h3k4me1.q.05_peak_30217	chr12	82222646	82223651
wt_h3k4me1.q.05_peak_71643	chr2	35815594	35817108
wt_h3k4me1.q.05_peak_125100	chr8	111217644	111219331
wt_h3k4me1.q.05_peak_63975	chr18	52563852	52564753
wt_h3k4me1.q.05_peak_70977	chr2	27876175	27876498
wt_h3k4me1.q.05_peak_30094	chr12	80745901	80746939
wt_h3k4me1.q.05_peak_3349	chr1	64295370	64295967
wt_h3k4me1.q.05_peak_12078	chr10	22718032	22723768
wt_h3k4me1.q.05_peak_34182	chr13	34766792	34768680
wt_h3k4me1.q.05_peak_4807	chr1	88929222	88929815
wt_h3k4me1.q.05_peak_12232	chr10	25520372	25520640
wt_h3k4me1.q.05_peak_44192	chr14	100226264	100227156
wt_h3k4me1.q.05_peak_77384	chr2	136086345	136086996
wt_h3k4me1.q.05_peak_12981	chr10	40687999	40688343
wt_h3k4me1.q.05_peak_80649	chr3	16532836	16534867
wt_h3k4me1.q.05_peak_42908	chr14	68406131	68406487
wt_h3k4me1.q.05_peak_35296	chr13	51136458	51137950
wt_h3k4me1.q.05_peak_66854	chr19	10780824	10781395
wt_h3k4me1.q.05_peak_79488	chr2	166818049	166818470
wt_h3k4me1.q.05_peak_83831	chr3	82042320	82044835
wt_h3k4me1.q.05_peak_95487	chr4	138011375	138012382
wt_h3k4me1.q.05_peak_96201	chr4	150338016	150339248
wt_h3k4me1.q.05_peak_23621	chr11	87613927	87616562
wt_h3k4me1.q.05_peak_766	chr1	21676206	21677435
wt_h3k4me1.q.05_peak_42588	chr14	64359645	64360625
wt_h3k4me1.q.05_peak_56110	chr16	92083741	92086330
wt_h3k4me1.q.05_peak_30508	chr12	85869358	85870125
wt_h3k4me1.q.05_peak_136067	chrX	160935948	160936957
wt_h3k4me1.q.05_peak_98009	chr5	27714192	27718531
wt_h3k4me1.q.05_peak_106179	chr6	28878015	28878488
wt_h3k4me1.q.05_peak_136246	chrX	166359431	166361935
wt_h3k4me1.q.05_peak_95510	chr4	138106981	138108146
wt_h3k4me1.q.05_peak_102853	chr5	118067184	118068282
wt_h3k4me1.q.05_peak_75360	chr2	104227439	104227806
wt_h3k4me1.q.05_peak_106334	chr6	31049116	31049733
wt_h3k4me1.q.05_peak_74986	chr2	97137024	97139268
wt_h3k4me1.q.05_peak_26800	chr12	13939835	13940106
wt_h3k4me1.q.05_peak_33592	chr13	22380304	22382010
wt_h3k4me1.q.05_peak_23137	chr11	80503241	80504155
wt_h3k4me1.q.05_peak_36139	chr13	60742891	60744249
wt_h3k4me1.q.05_peak_44355	chr14	103294002	103295067
wt_h3k4me1.q.05_peak_103763	chr5	129514583	129515018
wt_h3k4me1.q.05_peak_18695	chr11	6409768	6410705
wt_h3k4me1.q.05_peak_59644	chr17	69683093	69683478
wt_h3k4me1.q.05_peak_126945	chr9	20680066	20681086
wt_h3k4me1.q.05_peak_108138	chr6	59279755	59280743
wt_h3k4me1.q.05_peak_30394	chr12	83998084	83999043
wt_h3k4me1.q.05_peak_117553	chr7	111959408	111960716
wt_h3k4me1.q.05_peak_27686	chr12	32715760	32718457
wt_h3k4me1.q.05_peak_31260	chr12	100328726	100330806
wt_h3k4me1.q.05_peak_104643	chr5	144157175	144158298
wt_h3k4me1.q.05_peak_75924	chr2	114670838	114671631
wt_h3k4me1.q.05_peak_6392	chr1	128400418	128401056
wt_h3k4me1.q.05_peak_59982	chr17	74264128	74266120
wt_h3k4me1.q.05_peak_82857	chr3	60568135	60573651
wt_h3k4me1.q.05_peak_119969	chr8	12991542	12993772
wt_h3k4me1.q.05_peak_1197	chr1	28807697	28809606
wt_h3k4me1.q.05_peak_119759	chr8	10271402	10272707
wt_h3k4me1.q.05_peak_80332	chr3	7430364	7431968
wt_h3k4me1.q.05_peak_94752	chr4	128027774	128029634
wt_h3k4me1.q.05_peak_99777	chr5	62683222	62685459
wt_h3k4me1.q.05_peak_17815	chr10	120035256	120036182
wt_h3k4me1.q.05_peak_129354	chr9	54667830	54669164
wt_h3k4me1.q.05_peak_64508	chr18	60992749	60994114
wt_h3k4me1.q.05_peak_6602	chr1	132038919	132040035
wt_h3k4me1.q.05_peak_55619	chr16	81040746	81041926
wt_h3k4me1.q.05_peak_32195	chr12	111949896	111950284
wt_h3k4me1.q.05_peak_19164	chr11	18989116	18989543
wt_h3k4me1.q.05_peak_15881	chr10	90706459	90706894
wt_h3k4me1.q.05_peak_28129	chr12	40473886	40474250
wt_h3k4me1.q.05_peak_3540	chr1	66614455	66615715
wt_h3k4me1.q.05_peak_7996	chr1	155214291	155217779
wt_h3k4me1.q.05_peak_84072	chr3	85312654	85313218
wt_h3k4me1.q.05_peak_117124	chr7	100362063	100364225
wt_h3k4me1.q.05_peak_101963	chr5	105631745	105633169
wt_h3k4me1.q.05_peak_8663	chr1	163284683	163285833
wt_h3k4me1.q.05_peak_103566	chr5	126800150	126800746
wt_h3k4me1.q.05_peak_79453	chr2	166552469	166552823
wt_h3k4me1.q.05_peak_65491	chr18	74687921	74689672
wt_h3k4me1.q.05_peak_37871	chr13	98185940	98187098
wt_h3k4me1.q.05_peak_129931	chr9	62597750	62598438
wt_h3k4me1.q.05_peak_2843	chr1	56943400	56944080
wt_h3k4me1.q.05_peak_26298	chr12	5114442	5116239
wt_h3k4me1.q.05_peak_11262	chr10	9641171	9642977
wt_h3k4me1.q.05_peak_68781	chr19	47202514	47205476
wt_h3k4me1.q.05_peak_94027	chr4	116162212	116163366
wt_h3k4me1.q.05_peak_42004	chr14	55070889	55073219
wt_h3k4me1.q.05_peak_91808	chr4	73506817	73507118
wt_h3k4me1.q.05_peak_125401	chr8	116953281	116955442
wt_h3k4me1.q.05_peak_5998	chr1	121435241	121436880
wt_h3k4me1.q.05_peak_58054	chr17	32358227	32359068
wt_h3k4me1.q.05_peak_23173	chr11	80884280	80887684
wt_h3k4me1.q.05_peak_114006	chr7	29364269	29364664
wt_h3k4me1.q.05_peak_60983	chr17	90735106	90737663
wt_h3k4me1.q.05_peak_97968	chr5	27289882	27291990
wt_h3k4me1.q.05_peak_31099	chr12	98904215	98906142
wt_h3k4me1.q.05_peak_90664	chr4	48650155	48651713
wt_h3k4me1.q.05_peak_101222	chr5	91522349	91523843
wt_h3k4me1.q.05_peak_23234	chr11	81486010	81487112
wt_h3k4me1.q.05_peak_78441	chr2	152809771	152810350
wt_h3k4me1.q.05_peak_18455	chr11	3822507	3824437
wt_h3k4me1.q.05_peak_80837	chr3	21045557	21047059
wt_h3k4me1.q.05_peak_66065	chr18	82574557	82578190
wt_h3k4me1.q.05_peak_14956	chr10	76328422	76330397
wt_h3k4me1.q.05_peak_96869	chr5	6305721	6306034
wt_h3k4me1.q.05_peak_54672	chr16	56006008	56008958
wt_h3k4me1.q.05_peak_101294	chr5	92554463	92556004
wt_h3k4me1.q.05_peak_102142	chr5	108602317	108603302
wt_h3k4me1.q.05_peak_94449	chr4	123677367	123678099
wt_h3k4me1.q.05_peak_92511	chr4	87061417	87064242
wt_h3k4me1.q.05_peak_100905	chr5	82897925	82900070
wt_h3k4me1.q.05_peak_76881	chr2	129893177	129894003
wt_h3k4me1.q.05_peak_59299	chr17	64323150	64324987
wt_h3k4me1.q.05_peak_62718	chr18	33907330	33908542
wt_h3k4me1.q.05_peak_12367	chr10	27409705	27410960
wt_h3k4me1.q.05_peak_92615	chr4	88223295	88224003
wt_h3k4me1.q.05_peak_21822	chr11	61439875	61440147
wt_h3k4me1.q.05_peak_123884	chr8	87702123	87703400
wt_h3k4me1.q.05_peak_26050	chr11	120386953	120387705
wt_h3k4me1.q.05_peak_132076	chr9	102913929	102915565
wt_h3k4me1.q.05_peak_91970	chr4	77586322	77587276
wt_h3k4me1.q.05_peak_123432	chr8	81357739	81359187
wt_h3k4me1.q.05_peak_51936	chr16	9674148	9674748
wt_h3k4me1.q.05_peak_114389	chr7	44486817	44487491
wt_h3k4me1.q.05_peak_119114	chr7	139427799	139428439
wt_h3k4me1.q.05_peak_118370	chr7	124671384	124672445
wt_h3k4me1.q.05_peak_47608	chr15	48685556	48686117
wt_h3k4me1.q.05_peak_134093	chrX	36746649	36749828
wt_h3k4me1.q.05_peak_22213	chr11	67887557	67889843
wt_h3k4me1.q.05_peak_53216	chr16	31039837	31040155
wt_h3k4me1.q.05_peak_51391	chr15	102546586	102547835
wt_h3k4me1.q.05_peak_44438	chr14	104805220	104805526
wt_h3k4me1.q.05_peak_104571	chr5	143061368	143061716
wt_h3k4me1.q.05_peak_77857	chr2	143305528	143306470
wt_h3k4me1.q.05_peak_92684	chr4	90863298	90864429
wt_h3k4me1.q.05_peak_52279	chr16	14122663	14123366
wt_h3k4me1.q.05_peak_131537	chr9	94700357	94703423
wt_h3k4me1.q.05_peak_5208	chr1	93348514	93350280
wt_h3k4me1.q.05_peak_42198	chr14	59040663	59042285
wt_h3k4me1.q.05_peak_114306	chr7	40324882	40325833
wt_h3k4me1.q.05_peak_100119	chr5	66917158	66919578
wt_h3k4me1.q.05_peak_100893	chr5	82440641	82442435
wt_h3k4me1.q.05_peak_114624	chr7	49167108	49167500
wt_h3k4me1.q.05_peak_108820	chr6	77680873	77681518
wt_h3k4me1.q.05_peak_128877	chr9	47732742	47735237
wt_h3k4me1.q.05_peak_111443	chr6	115309052	115309618
wt_h3k4me1.q.05_peak_27594	chr12	31519950	31521776
wt_h3k4me1.q.05_peak_79965	chr2	178218158	178221237
wt_h3k4me1.q.05_peak_118194	chr7	122308646	122309701
wt_h3k4me1.q.05_peak_98444	chr5	35111321	35113620
wt_h3k4me1.q.05_peak_95553	chr4	138504046	138504505
wt_h3k4me1.q.05_peak_10556	chr1	191950177	191951231
wt_h3k4me1.q.05_peak_130627	chr9	73257968	73259098
wt_h3k4me1.q.05_peak_37865	chr13	98135552	98137835
wt_h3k4me1.q.05_peak_128761	chr9	46072916	46074394
wt_h3k4me1.q.05_peak_11457	chr10	12848329	12849494
wt_h3k4me1.q.05_peak_79387	chr2	166029218	166030267
wt_h3k4me1.q.05_peak_136015	chrX	159828859	159829711
wt_h3k4me1.q.05_peak_128795	chr9	46630068	46630746
wt_h3k4me1.q.05_peak_87551	chr3	144616966	144618035
wt_h3k4me1.q.05_peak_114629	chr7	49188335	49192391
wt_h3k4me1.q.05_peak_60634	chr17	86282266	86284449
wt_h3k4me1.q.05_peak_57507	chr17	25622643	25627169
wt_h3k4me1.q.05_peak_89581	chr4	28848607	28850756
wt_h3k4me1.q.05_peak_127489	chr9	28469024	28470408
wt_h3k4me1.q.05_peak_14435	chr10	69253861	69254766
wt_h3k4me1.q.05_peak_48761	chr15	68193720	68195441
wt_h3k4me1.q.05_peak_98629	chr5	36931925	36933003
wt_h3k4me1.q.05_peak_97629	chr5	21987270	21988008
wt_h3k4me1.q.05_peak_95974	chr4	145010970	145011803
wt_h3k4me1.q.05_peak_90857	chr4	53525404	53528499
wt_h3k4me1.q.05_peak_53888	chr16	38947563	38948001
wt_h3k4me1.q.05_peak_56615	chr17	3491331	3495162
wt_h3k4me1.q.05_peak_132360	chr9	106416417	106419306
wt_h3k4me1.q.05_peak_2566	chr1	53194791	53195450
wt_h3k4me1.q.05_peak_79968	chr2	178229212	178230842
wt_h3k4me1.q.05_peak_66410	chr19	3475561	3476085
wt_h3k4me1.q.05_peak_93314	chr4	102785265	102787485
wt_h3k4me1.q.05_peak_52718	chr16	22466425	22466852
wt_h3k4me1.q.05_peak_95320	chr4	135258652	135259087
wt_h3k4me1.q.05_peak_18520	chr11	4659684	4663279
wt_h3k4me1.q.05_peak_85106	chr3	103411854	103412840
wt_h3k4me1.q.05_peak_14594	chr10	70483296	70483940
wt_h3k4me1.q.05_peak_45143	chr14	121214420	121217387
wt_h3k4me1.q.05_peak_95258	chr4	134473690	134474597
wt_h3k4me1.q.05_peak_105397	chr6	10802756	10803981
wt_h3k4me1.q.05_peak_95050	chr4	131355210	131357369
wt_h3k4me1.q.05_peak_53988	chr16	40973650	40974214
wt_h3k4me1.q.05_peak_58778	chr17	50624542	50625436
wt_h3k4me1.q.05_peak_11905	chr10	20244389	20246474
wt_h3k4me1.q.05_peak_106032	chr6	27468081	27468510
wt_h3k4me1.q.05_peak_25610	chr11	116494758	116495290
wt_h3k4me1.q.05_peak_7156	chr1	137588101	137589372
wt_h3k4me1.q.05_peak_17823	chr10	120164874	120165629
wt_h3k4me1.q.05_peak_29788	chr12	75789325	75790184
wt_h3k4me1.q.05_peak_54003	chr16	41275709	41277561
wt_h3k4me1.q.05_peak_104274	chr5	139024042	139024538
wt_h3k4me1.q.05_peak_102387	chr5	112533117	112533579
wt_h3k4me1.q.05_peak_102924	chr5	118605309	118607239
wt_h3k4me1.q.05_peak_2838	chr1	56923913	56927388
wt_h3k4me1.q.05_peak_21834	chr11	61531746	61533224
wt_h3k4me1.q.05_peak_24050	chr11	95369415	95370494
wt_h3k4me1.q.05_peak_99982	chr5	65471203	65475187
wt_h3k4me1.q.05_peak_75659	chr2	109884477	109886119
wt_h3k4me1.q.05_peak_57038	chr17	11087652	11088164
wt_h3k4me1.q.05_peak_96099	chr4	149344363	149345056
wt_h3k4me1.q.05_peak_19940	chr11	31802429	31804200
wt_h3k4me1.q.05_peak_68164	chr19	37029367	37030005
wt_h3k4me1.q.05_peak_47621	chr15	48781370	48784042
wt_h3k4me1.q.05_peak_136056	chrX	160865767	160867671
wt_h3k4me1.q.05_peak_90476	chr4	46824372	46825005
wt_h3k4me1.q.05_peak_71527	chr2	34085316	34087367
wt_h3k4me1.q.05_peak_63789	chr18	47357788	47359719
wt_h3k4me1.q.05_peak_67272	chr19	21723945	21724504
wt_h3k4me1.q.05_peak_58510	chr17	46944093	46945304
wt_h3k4me1.q.05_peak_78904	chr2	158691466	158693172
wt_h3k4me1.q.05_peak_47769	chr15	52967857	52968291
wt_h3k4me1.q.05_peak_113909	chr7	27612702	27614806
wt_h3k4me1.q.05_peak_101430	chr5	97015641	97017647
wt_h3k4me1.q.05_peak_71885	chr2	41383128	41384231
wt_h3k4me1.q.05_peak_17770	chr10	119614405	119615564
wt_h3k4me1.q.05_peak_85214	chr3	104670015	104670387
wt_h3k4me1.q.05_peak_113780	chr7	24437551	24439468
wt_h3k4me1.q.05_peak_124864	chr8	106913113	106913988
wt_h3k4me1.q.05_peak_125071	chr8	110876259	110877014
wt_h3k4me1.q.05_peak_12988	chr10	40725591	40727657
wt_h3k4me1.q.05_peak_98898	chr5	42170250	42170517
wt_h3k4me1.q.05_peak_61557	chr18	12794698	12794950
wt_h3k4me1.q.05_peak_34580	chr13	42693573	42694231
wt_h3k4me1.q.05_peak_111025	chr6	111368693	111369553
wt_h3k4me1.q.05_peak_31741	chr12	106822036	106822449
wt_h3k4me1.q.05_peak_78189	chr2	148334259	148335507
wt_h3k4me1.q.05_peak_85387	chr3	107150939	107151344
wt_h3k4me1.q.05_peak_134109	chrX	36977812	36978528
wt_h3k4me1.q.05_peak_35699	chr13	55494468	55496450
wt_h3k4me1.q.05_peak_63643	chr18	45630271	45633108
wt_h3k4me1.q.05_peak_75316	chr2	103667871	103670969
wt_h3k4me1.q.05_peak_31057	chr12	98337527	98340302
wt_h3k4me1.q.05_peak_68538	chr19	43925013	43925560
wt_h3k4me1.q.05_peak_40859	chr14	29865704	29866211
wt_h3k4me1.q.05_peak_30253	chr12	82365804	82371008
wt_h3k4me1.q.05_peak_115449	chr7	67619623	67621090
wt_h3k4me1.q.05_peak_91925	chr4	76811447	76812808
wt_h3k4me1.q.05_peak_43447	chr14	76882385	76883811
wt_h3k4me1.q.05_peak_48678	chr15	66952456	66953506
wt_h3k4me1.q.05_peak_46681	chr15	31988138	31990334
wt_h3k4me1.q.05_peak_27501	chr12	29932679	29934824
wt_h3k4me1.q.05_peak_24554	chr11	102384706	102384958
wt_h3k4me1.q.05_peak_4383	chr1	82775183	82775989
wt_h3k4me1.q.05_peak_28863	chr12	55666360	55667448
wt_h3k4me1.q.05_peak_90276	chr4	44061814	44063218
wt_h3k4me1.q.05_peak_23284	chr11	81897179	81898430
wt_h3k4me1.q.05_peak_82200	chr3	51156750	51157439
wt_h3k4me1.q.05_peak_54729	chr16	57389345	57390968
wt_h3k4me1.q.05_peak_63523	chr18	43586723	43588015
wt_h3k4me1.q.05_peak_78912	chr2	158726718	158727003
wt_h3k4me1.q.05_peak_96637	chr4	155280799	155282823
wt_h3k4me1.q.05_peak_110392	chr6	100971688	100973166
wt_h3k4me1.q.05_peak_99396	chr5	51888448	51889539
wt_h3k4me1.q.05_peak_14464	chr10	69592303	69592635
wt_h3k4me1.q.05_peak_94345	chr4	120987052	120988472
wt_h3k4me1.q.05_peak_6342	chr1	127945249	127947367
wt_h3k4me1.q.05_peak_19051	chr11	15385905	15386966
wt_h3k4me1.q.05_peak_65640	chr18	76119837	76120351
wt_h3k4me1.q.05_peak_99965	chr5	65191469	65192965
wt_h3k4me1.q.05_peak_53517	chr16	34252368	34255076
wt_h3k4me1.q.05_peak_83872	chr3	82363665	82366321
wt_h3k4me1.q.05_peak_69989	chr2	7529628	7532217
wt_h3k4me1.q.05_peak_77790	chr2	142714712	142715982
wt_h3k4me1.q.05_peak_17058	chr10	108978013	108981055
wt_h3k4me1.q.05_peak_51185	chr15	100080641	100084098
wt_h3k4me1.q.05_peak_124685	chr8	104261566	104261919
wt_h3k4me1.q.05_peak_129658	chr9	58608383	58609451
wt_h3k4me1.q.05_peak_87695	chr3	146820692	146821396
wt_h3k4me1.q.05_peak_51424	chr15	102802006	102802919
wt_h3k4me1.q.05_peak_82254	chr3	51727447	51729863
wt_h3k4me1.q.05_peak_39171	chr13	117215786	117218274
wt_h3k4me1.q.05_peak_16464	chr10	98970843	98975046
wt_h3k4me1.q.05_peak_93382	chr4	103698795	103700468
wt_h3k4me1.q.05_peak_61565	chr18	12821827	12823267
wt_h3k4me1.q.05_peak_20356	chr11	36451299	36452654
wt_h3k4me1.q.05_peak_14291	chr10	67140391	67141508
wt_h3k4me1.q.05_peak_91704	chr4	70310989	70312813
wt_h3k4me1.q.05_peak_22811	chr11	76483145	76483621
wt_h3k4me1.q.05_peak_90018	chr4	39991081	39992752
wt_h3k4me1.q.05_peak_124619	chr8	103412638	103414270
wt_h3k4me1.q.05_peak_40671	chr14	27477524	27478559
wt_h3k4me1.q.05_peak_49921	chr15	82850487	82852917
wt_h3k4me1.q.05_peak_85723	chr3	115028905	115029888
wt_h3k4me1.q.05_peak_11553	chr10	13874315	13875458
wt_h3k4me1.q.05_peak_14642	chr10	70850495	70851742
wt_h3k4me1.q.05_peak_21750	chr11	60292573	60295297
wt_h3k4me1.q.05_peak_118667	chr7	130750359	130751091
wt_h3k4me1.q.05_peak_56882	chr17	8482739	8484125
wt_h3k4me1.q.05_peak_34762	chr13	43496032	43497243
wt_h3k4me1.q.05_peak_1766	chr1	38417436	38419115
wt_h3k4me1.q.05_peak_92065	chr4	80737806	80738069
wt_h3k4me1.q.05_peak_62868	chr18	35681692	35683412
wt_h3k4me1.q.05_peak_78385	chr2	151961656	151963313
wt_h3k4me1.q.05_peak_31707	chr12	106055525	106055881
wt_h3k4me1.q.05_peak_67401	chr19	23609249	23612078
wt_h3k4me1.q.05_peak_7186	chr1	137939693	137940994
wt_h3k4me1.q.05_peak_79989	chr2	178320533	178322544
wt_h3k4me1.q.05_peak_58689	chr17	49471247	49472111
wt_h3k4me1.q.05_peak_35738	chr13	56154681	56155685
wt_h3k4me1.q.05_peak_216	chr1	9615140	9617112
wt_h3k4me1.q.05_peak_57105	chr17	12134407	12134754
wt_h3k4me1.q.05_peak_35831	chr13	57617632	57620932
wt_h3k4me1.q.05_peak_116835	chr7	96745626	96746624
wt_h3k4me1.q.05_peak_74553	chr2	91014363	91016415
wt_h3k4me1.q.05_peak_66696	chr19	7297611	7299151
wt_h3k4me1.q.05_peak_43479	chr14	77256824	77257472
wt_h3k4me1.q.05_peak_65797	chr18	78444050	78444370
wt_h3k4me1.q.05_peak_117065	chr7	99585961	99587248
wt_h3k4me1.q.05_peak_101560	chr5	99458543	99460024
wt_h3k4me1.q.05_peak_133763	chrX	11654459	11655725
wt_h3k4me1.q.05_peak_7242	chr1	138902247	138902580
wt_h3k4me1.q.05_peak_4029	chr1	76483852	76484236
wt_h3k4me1.q.05_peak_64983	chr18	67125781	67127109
wt_h3k4me1.q.05_peak_96595	chr4	155028664	155031269
wt_h3k4me1.q.05_peak_85281	chr3	105524102	105524628
wt_h3k4me1.q.05_peak_22914	chr11	77851561	77852162
wt_h3k4me1.q.05_peak_39205	chr13	117738844	117739699
wt_h3k4me1.q.05_peak_10649	chr1	192651606	192652111
wt_h3k4me1.q.05_peak_74517	chr2	90633810	90635841
wt_h3k4me1.q.05_peak_103287	chr5	123954921	123956597
wt_h3k4me1.q.05_peak_24498	chr11	101756185	101757028
wt_h3k4me1.q.05_peak_49539	chr15	78633339	78637571
wt_h3k4me1.q.05_peak_3284	chr1	63819621	63821315
wt_h3k4me1.q.05_peak_121044	chr8	32795453	32796561
wt_h3k4me1.q.05_peak_84407	chr3	89660052	89661079
wt_h3k4me1.q.05_peak_14700	chr10	71663378	71664109
wt_h3k4me1.q.05_peak_116276	chr7	84362621	84363968
wt_h3k4me1.q.05_peak_81935	chr3	41194354	41195574
wt_h3k4me1.q.05_peak_129038	chr9	49737076	49738058
wt_h3k4me1.q.05_peak_9984	chr1	181445389	181448613
wt_h3k4me1.q.05_peak_113306	chr6	146446023	146447113
wt_h3k4me1.q.05_peak_124194	chr8	93850423	93857702
wt_h3k4me1.q.05_peak_99864	chr5	64057280	64057550
wt_h3k4me1.q.05_peak_53644	chr16	35215605	35216322
wt_h3k4me1.q.05_peak_1028	chr1	24999730	25001217
wt_h3k4me1.q.05_peak_50424	chr15	88887667	88888576
wt_h3k4me1.q.05_peak_132409	chr9	106957412	106959420
wt_h3k4me1.q.05_peak_76424	chr2	121685655	121686090
wt_h3k4me1.q.05_peak_45700	chr15	11978550	11978934
wt_h3k4me1.q.05_peak_95473	chr4	137896980	137899179
wt_h3k4me1.q.05_peak_101068	chr5	88945279	88947235
wt_h3k4me1.q.05_peak_69316	chr19	57571639	57573431
wt_h3k4me1.q.05_peak_135453	chrX	134108038	134108907
wt_h3k4me1.q.05_peak_34821	chr13	44247971	44249155
wt_h3k4me1.q.05_peak_32687	chr13	6188704	6190591
wt_h3k4me1.q.05_peak_99761	chr5	62088743	62089496
wt_h3k4me1.q.05_peak_62124	chr18	23849398	23849825
wt_h3k4me1.q.05_peak_134630	chrX	72011226	72012867
wt_h3k4me1.q.05_peak_85562	chr3	108575010	108576426
wt_h3k4me1.q.05_peak_89297	chr4	20526779	20527352
wt_h3k4me1.q.05_peak_40121	chr14	20772885	20773175
wt_h3k4me1.q.05_peak_91937	chr4	77041481	77042015
wt_h3k4me1.q.05_peak_70829	chr2	25917739	25920890
wt_h3k4me1.q.05_peak_127560	chr9	29074544	29075349
wt_h3k4me1.q.05_peak_109189	chr6	85286425	85286875
wt_h3k4me1.q.05_peak_51995	chr16	9938248	9938614
wt_h3k4me1.q.05_peak_48970	chr15	71705484	71707966
wt_h3k4me1.q.05_peak_21313	chr11	54312263	54313531
wt_h3k4me1.q.05_peak_115212	chr7	64626053	64626420
wt_h3k4me1.q.05_peak_103497	chr5	125649648	125650909
wt_h3k4me1.q.05_peak_109872	chr6	93523823	93525380
wt_h3k4me1.q.05_peak_46130	chr15	24716998	24718206
wt_h3k4me1.q.05_peak_86819	chr3	133964980	133966268
wt_h3k4me1.q.05_peak_107875	chr6	54811265	54813211
wt_h3k4me1.q.05_peak_64452	chr18	60731573	60733907
wt_h3k4me1.q.05_peak_49509	chr15	78182062	78182316
wt_h3k4me1.q.05_peak_110834	chr6	108273633	108275558
wt_h3k4me1.q.05_peak_38188	chr13	102572879	102573783
wt_h3k4me1.q.05_peak_82258	chr3	51778551	51779536
wt_h3k4me1.q.05_peak_75584	chr2	107613451	107615730
wt_h3k4me1.q.05_peak_66534	chr19	5149791	5152245
wt_h3k4me1.q.05_peak_46489	chr15	30293402	30295417
wt_h3k4me1.q.05_peak_87660	chr3	146567461	146569026
wt_h3k4me1.q.05_peak_97196	chr5	15957040	15958193
wt_h3k4me1.q.05_peak_110385	chr6	100928559	100931396
wt_h3k4me1.q.05_peak_77750	chr2	142038386	142039668
wt_h3k4me1.q.05_peak_84084	chr3	85390585	85392184
wt_h3k4me1.q.05_peak_68937	chr19	50558433	50560050
wt_h3k4me1.q.05_peak_8575	chr1	162074455	162075195
wt_h3k4me1.q.05_peak_52495	chr16	18219727	18220837
wt_h3k4me1.q.05_peak_37063	chr13	84564891	84566782
wt_h3k4me1.q.05_peak_108431	chr6	67101952	67103352
wt_h3k4me1.q.05_peak_22768	chr11	75864838	75867078
wt_h3k4me1.q.05_peak_128450	chr9	42673647	42674334
wt_h3k4me1.q.05_peak_113304	chr6	146403241	146405505
wt_h3k4me1.q.05_peak_83125	chr3	67923135	67923590
wt_h3k4me1.q.05_peak_97369	chr5	19815991	19817035
wt_h3k4me1.q.05_peak_43073	chr14	71028266	71028699
wt_h3k4me1.q.05_peak_51911	chr16	9280545	9281686
wt_h3k4me1.q.05_peak_121513	chr8	40597562	40599667
wt_h3k4me1.q.05_peak_20080	chr11	32781711	32782105
wt_h3k4me1.q.05_peak_1713	chr1	37726725	37729748
wt_h3k4me1.q.05_peak_21572	chr11	58024202	58025798
wt_h3k4me1.q.05_peak_61984	chr18	22407540	22408526
wt_h3k4me1.q.05_peak_115391	chr7	66868376	66869724
wt_h3k4me1.q.05_peak_46317	chr15	27523455	27526241
wt_h3k4me1.q.05_peak_8361	chr1	159546515	159546957
wt_h3k4me1.q.05_peak_118808	chr7	132762830	132766424
wt_h3k4me1.q.05_peak_31782	chr12	107904035	107904611
wt_h3k4me1.q.05_peak_14671	chr10	71263100	71266971
wt_h3k4me1.q.05_peak_53602	chr16	34686977	34687601
wt_h3k4me1.q.05_peak_9861	chr1	180015458	180016158
wt_h3k4me1.q.05_peak_54619	chr16	54497907	54498306
wt_h3k4me1.q.05_peak_43642	chr14	78924093	78925803
wt_h3k4me1.q.05_peak_92947	chr4	97885397	97886737
wt_h3k4me1.q.05_peak_100320	chr5	71888787	71889841
wt_h3k4me1.q.05_peak_75556	chr2	107031528	107032457
wt_h3k4me1.q.05_peak_35874	chr13	57889628	57891995
wt_h3k4me1.q.05_peak_32995	chr13	11663006	11663678
wt_h3k4me1.q.05_peak_48310	chr15	62074325	62075643
wt_h3k4me1.q.05_peak_88567	chr4	5787739	5789168
wt_h3k4me1.q.05_peak_9468	chr1	175211852	175212915
wt_h3k4me1.q.05_peak_115125	chr7	63676161	63678697
wt_h3k4me1.q.05_peak_6432	chr1	129324302	129325460
wt_h3k4me1.q.05_peak_12492	chr10	29344346	29345431
wt_h3k4me1.q.05_peak_112112	chr6	126553420	126554643
wt_h3k4me1.q.05_peak_65803	chr18	78458152	78459382
wt_h3k4me1.q.05_peak_26776	chr12	13537978	13539732
wt_h3k4me1.q.05_peak_26326	chr12	5185923	5192659
wt_h3k4me1.q.05_peak_82253	chr3	51721153	51722230
wt_h3k4me1.q.05_peak_49816	chr15	81177073	81177964
wt_h3k4me1.q.05_peak_30059	chr12	80365274	80367040
wt_h3k4me1.q.05_peak_123122	chr8	73637869	73639475
wt_h3k4me1.q.05_peak_114664	chr7	49337718	49338048
wt_h3k4me1.q.05_peak_92014	chr4	78113582	78115034
wt_h3k4me1.q.05_peak_70261	chr2	14640255	14641884
wt_h3k4me1.q.05_peak_77130	chr2	132511941	132512449
wt_h3k4me1.q.05_peak_6788	chr1	133744235	133745930
wt_h3k4me1.q.05_peak_40747	chr14	27983386	27985839
wt_h3k4me1.q.05_peak_6552	chr1	131451596	131453186
wt_h3k4me1.q.05_peak_40349	chr14	23687956	23689503
wt_h3k4me1.q.05_peak_132763	chr9	112102086	112102367
wt_h3k4me1.q.05_peak_97661	chr5	22829843	22830381
wt_h3k4me1.q.05_peak_67356	chr19	23091323	23092603
wt_h3k4me1.q.05_peak_99491	chr5	52908285	52908712
wt_h3k4me1.q.05_peak_6740	chr1	133178147	133179765
wt_h3k4me1.q.05_peak_122392	chr8	61826773	61827160
wt_h3k4me1.q.05_peak_13557	chr10	53348700	53349438
wt_h3k4me1.q.05_peak_84945	chr3	101116205	101116935
wt_h3k4me1.q.05_peak_49760	chr15	80752988	80753931
wt_h3k4me1.q.05_peak_99899	chr5	64335719	64339206
wt_h3k4me1.q.05_peak_88025	chr3	153440850	153442912
wt_h3k4me1.q.05_peak_19308	chr11	20849060	20850265
wt_h3k4me1.q.05_peak_74707	chr2	92489759	92493175
wt_h3k4me1.q.05_peak_53501	chr16	34204653	34207697
wt_h3k4me1.q.05_peak_69434	chr19	59314421	59314744
wt_h3k4me1.q.05_peak_5515	chr1	105083631	105085449
wt_h3k4me1.q.05_peak_87133	chr3	138766998	138772225
wt_h3k4me1.q.05_peak_65979	chr18	80802474	80803316
wt_h3k4me1.q.05_peak_64804	chr18	64970812	64972617
wt_h3k4me1.q.05_peak_31751	chr12	107047092	107047630
wt_h3k4me1.q.05_peak_32070	chr12	110862975	110866335
wt_h3k4me1.q.05_peak_71619	chr2	35671389	35679215
wt_h3k4me1.q.05_peak_16361	chr10	97209546	97211169
wt_h3k4me1.q.05_peak_131814	chr9	98264507	98265304
wt_h3k4me1.q.05_peak_29652	chr12	74008851	74009836
wt_h3k4me1.q.05_peak_19243	chr11	20213237	20214108
wt_h3k4me1.q.05_peak_46445	chr15	28721313	28721850
wt_h3k4me1.q.05_peak_98414	chr5	34598059	34598683
wt_h3k4me1.q.05_peak_15406	chr10	82999393	83000634
wt_h3k4me1.q.05_peak_90493	chr4	46879433	46882506
wt_h3k4me1.q.05_peak_91174	chr4	58439056	58439912
wt_h3k4me1.q.05_peak_82003	chr3	42382072	42382678
wt_h3k4me1.q.05_peak_5696	chr1	108389239	108391186
wt_h3k4me1.q.05_peak_80855	chr3	21524475	21525077
wt_h3k4me1.q.05_peak_120705	chr8	25150359	25151141
wt_h3k4me1.q.05_peak_4483	chr1	84214818	84216571
wt_h3k4me1.q.05_peak_114007	chr7	29367057	29369093
wt_h3k4me1.q.05_peak_84802	chr3	98088736	98090310
wt_h3k4me1.q.05_peak_104784	chr5	146956496	146957805
wt_h3k4me1.q.05_peak_115218	chr7	64651226	64653544
wt_h3k4me1.q.05_peak_24769	chr11	104557873	104559765
wt_h3k4me1.q.05_peak_40384	chr14	23838353	23839149
wt_h3k4me1.q.05_peak_132998	chr9	115023206	115025437
wt_h3k4me1.q.05_peak_56111	chr16	92098606	92100467
wt_h3k4me1.q.05_peak_30811	chr12	90159820	90160593
wt_h3k4me1.q.05_peak_129448	chr9	56451560	56452225
wt_h3k4me1.q.05_peak_114175	chr7	36060769	36062429
wt_h3k4me1.q.05_peak_90539	chr4	47074435	47075313
wt_h3k4me1.q.05_peak_32532	chr12	118376404	118377135
wt_h3k4me1.q.05_peak_10780	chr1	194089541	194090411
wt_h3k4me1.q.05_peak_40711	chr14	27818391	27819102
wt_h3k4me1.q.05_peak_31421	chr12	102416049	102417808
wt_h3k4me1.q.05_peak_49147	chr15	73632142	73633193
wt_h3k4me1.q.05_peak_10100	chr1	183042983	183044199
wt_h3k4me1.q.05_peak_29703	chr12	74362568	74363483
wt_h3k4me1.q.05_peak_101825	chr5	103182201	103185007
wt_h3k4me1.q.05_peak_40674	chr14	27606936	27608708
wt_h3k4me1.q.05_peak_23255	chr11	81647259	81647856
wt_h3k4me1.q.05_peak_94999	chr4	130776005	130776673
wt_h3k4me1.q.05_peak_27221	chr12	26369553	26371573
wt_h3k4me1.q.05_peak_121137	chr8	34371097	34373492
wt_h3k4me1.q.05_peak_102518	chr5	113590688	113595430
wt_h3k4me1.q.05_peak_73797	chr2	73694976	73698560
wt_h3k4me1.q.05_peak_34523	chr13	41945640	41946084
wt_h3k4me1.q.05_peak_135532	chrX	136715225	136715830
wt_h3k4me1.q.05_peak_68185	chr19	37131025	37132410
wt_h3k4me1.q.05_peak_31339	chr12	100965522	100966943
wt_h3k4me1.q.05_peak_71844	chr2	39132893	39133345
wt_h3k4me1.q.05_peak_113435	chr6	148420114	148422457
wt_h3k4me1.q.05_peak_30731	chr12	89097158	89098408
wt_h3k4me1.q.05_peak_63650	chr18	45657198	45658156
wt_h3k4me1.q.05_peak_114893	chr7	56101997	56102848
wt_h3k4me1.q.05_peak_20280	chr11	35861273	35866632
wt_h3k4me1.q.05_peak_48491	chr15	64560639	64561095
wt_h3k4me1.q.05_peak_56418	chr16	95994039	95995671
wt_h3k4me1.q.05_peak_108171	chr6	60765089	60766494
wt_h3k4me1.q.05_peak_134811	chrX	81607397	81607903
wt_h3k4me1.q.05_peak_8386	chr1	159670137	159671505
wt_h3k4me1.q.05_peak_59706	chr17	70441730	70443071
wt_h3k4me1.q.05_peak_84907	chr3	100751053	100751934
wt_h3k4me1.q.05_peak_81039	chr3	25895049	25896586
wt_h3k4me1.q.05_peak_10367	chr1	189045976	189046872
wt_h3k4me1.q.05_peak_4131	chr1	78231789	78232688
wt_h3k4me1.q.05_peak_34704	chr13	43089138	43089683
wt_h3k4me1.q.05_peak_93008	chr4	98622359	98623627
wt_h3k4me1.q.05_peak_7975	chr1	155058330	155060782
wt_h3k4me1.q.05_peak_59322	chr17	64626800	64631590
wt_h3k4me1.q.05_peak_35088	chr13	46907123	46908362
wt_h3k4me1.q.05_peak_17423	chr10	113985143	113986086
wt_h3k4me1.q.05_peak_83714	chr3	80610224	80610812
wt_h3k4me1.q.05_peak_73238	chr2	65998447	65998806
wt_h3k4me1.q.05_peak_27186	chr12	26072040	26072799
wt_h3k4me1.q.05_peak_18027	chr10	123084260	123085616
wt_h3k4me1.q.05_peak_92460	chr4	86399764	86401167
wt_h3k4me1.q.05_peak_32585	chr12	120014713	120016731
wt_h3k4me1.q.05_peak_78827	chr2	157775637	157777593
wt_h3k4me1.q.05_peak_102969	chr5	119388880	119390530
wt_h3k4me1.q.05_peak_62604	chr18	32338426	32340722
wt_h3k4me1.q.05_peak_35905	chr13	58202576	58203778
wt_h3k4me1.q.05_peak_86390	chr3	126925852	126926497
wt_h3k4me1.q.05_peak_32905	chr13	9950994	9952506
wt_h3k4me1.q.05_peak_49492	chr15	78061900	78064940
wt_h3k4me1.q.05_peak_127184	chr9	24908432	24909889
wt_h3k4me1.q.05_peak_26747	chr12	13159296	13160897
wt_h3k4me1.q.05_peak_63658	chr18	45713592	45714994
wt_h3k4me1.q.05_peak_24067	chr11	95493689	95494888
wt_h3k4me1.q.05_peak_117429	chr7	109968093	109968981
wt_h3k4me1.q.05_peak_130735	chr9	75333474	75334151
wt_h3k4me1.q.05_peak_84100	chr3	85534709	85536126
wt_h3k4me1.q.05_peak_69314	chr19	57567949	57568245
wt_h3k4me1.q.05_peak_94206	chr4	119589469	119591240
wt_h3k4me1.q.05_peak_124190	chr8	93823642	93825766
wt_h3k4me1.q.05_peak_77995	chr2	144654828	144656479
wt_h3k4me1.q.05_peak_91501	chr4	66230637	66231355
wt_h3k4me1.q.05_peak_103787	chr5	130043798	130044235
wt_h3k4me1.q.05_peak_77965	chr2	144293922	144295118
wt_h3k4me1.q.05_peak_83083	chr3	66082656	66084106
wt_h3k4me1.q.05_peak_45115	chr14	121105903	121107256
wt_h3k4me1.q.05_peak_48591	chr15	66160616	66162426
wt_h3k4me1.q.05_peak_9611	chr1	176939771	176940789
wt_h3k4me1.q.05_peak_68438	chr19	42226359	42227775
wt_h3k4me1.q.05_peak_102446	chr5	113007620	113008759
wt_h3k4me1.q.05_peak_23200	chr11	81054984	81056216
wt_h3k4me1.q.05_peak_56819	chr17	6808470	6809031
wt_h3k4me1.q.05_peak_23364	chr11	83394259	83395782
wt_h3k4me1.q.05_peak_78054	chr2	145531053	145531401
wt_h3k4me1.q.05_peak_33763	chr13	25361668	25363053
wt_h3k4me1.q.05_peak_26427	chr12	6847942	6849350
wt_h3k4me1.q.05_peak_15467	chr10	83642986	83644434
wt_h3k4me1.q.05_peak_85127	chr3	103612413	103613636
wt_h3k4me1.q.05_peak_129885	chr9	62275965	62277403
wt_h3k4me1.q.05_peak_34557	chr13	42402938	42404291
wt_h3k4me1.q.05_peak_48707	chr15	67220919	67222558
wt_h3k4me1.q.05_peak_9466	chr1	175209385	175210007
wt_h3k4me1.q.05_peak_80457	chr3	9513750	9514146
wt_h3k4me1.q.05_peak_27048	chr12	21226568	21227821
wt_h3k4me1.q.05_peak_962	chr1	24089766	24091090
wt_h3k4me1.q.05_peak_24414	chr11	100388319	100389031
wt_h3k4me1.q.05_peak_125285	chr8	114294246	114295882
wt_h3k4me1.q.05_peak_78642	chr2	156084935	156086012
wt_h3k4me1.q.05_peak_91765	chr4	71838854	71842414
wt_h3k4me1.q.05_peak_54436	chr16	49520575	49522888
wt_h3k4me1.q.05_peak_111620	chr6	117806517	117806815
wt_h3k4me1.q.05_peak_99800	chr5	62793419	62794398
wt_h3k4me1.q.05_peak_20208	chr11	35260638	35263446
wt_h3k4me1.q.05_peak_103909	chr5	131821420	131822110
wt_h3k4me1.q.05_peak_9614	chr1	176948739	176949769
wt_h3k4me1.q.05_peak_48685	chr15	66988359	66989389
wt_h3k4me1.q.05_peak_121613	chr8	43167453	43168536
wt_h3k4me1.q.05_peak_32572	chr12	119453774	119455457
wt_h3k4me1.q.05_peak_132867	chr9	113080707	113081478
wt_h3k4me1.q.05_peak_115461	chr7	67827504	67828930
wt_h3k4me1.q.05_peak_60230	chr17	80099541	80100179
wt_h3k4me1.q.05_peak_92354	chr4	85225867	85229406
wt_h3k4me1.q.05_peak_81361	chr3	31049502	31049894
wt_h3k4me1.q.05_peak_99904	chr5	64363866	64368914
wt_h3k4me1.q.05_peak_563	chr1	16255881	16259444
wt_h3k4me1.q.05_peak_21903	chr11	62624382	62625490
wt_h3k4me1.q.05_peak_73151	chr2	65399387	65400725
wt_h3k4me1.q.05_peak_132997	chr9	115018632	115020446
wt_h3k4me1.q.05_peak_52751	chr16	22775245	22776587
wt_h3k4me1.q.05_peak_111454	chr6	115479846	115480820
wt_h3k4me1.q.05_peak_97442	chr5	20275329	20276195
wt_h3k4me1.q.05_peak_52132	chr16	11853168	11853682
wt_h3k4me1.q.05_peak_79998	chr2	178497857	178499133
wt_h3k4me1.q.05_peak_106066	chr6	27977279	27978273
wt_h3k4me1.q.05_peak_114682	chr7	49398936	49400064
wt_h3k4me1.q.05_peak_88029	chr3	153472843	153473121
wt_h3k4me1.q.05_peak_62614	chr18	32389493	32392285
wt_h3k4me1.q.05_peak_131526	chr9	94610233	94611234
wt_h3k4me1.q.05_peak_127711	chr9	30234154	30235668
wt_h3k4me1.q.05_peak_84178	chr3	86831534	86833636
wt_h3k4me1.q.05_peak_59469	chr17	66396416	66398105
wt_h3k4me1.q.05_peak_72986	chr2	62525901	62526578
wt_h3k4me1.q.05_peak_76511	chr2	123323609	123324763
wt_h3k4me1.q.05_peak_99020	chr5	44202119	44204482
wt_h3k4me1.q.05_peak_12878	chr10	39536366	39536764
wt_h3k4me1.q.05_peak_17092	chr10	109527851	109528658
wt_h3k4me1.q.05_peak_63068	chr18	38383884	38385379
wt_h3k4me1.q.05_peak_93334	chr4	102868608	102869014
wt_h3k4me1.q.05_peak_49698	chr15	80190670	80191551
wt_h3k4me1.q.05_peak_55667	chr16	83022283	83023224
wt_h3k4me1.q.05_peak_90409	chr4	46088242	46089368
wt_h3k4me1.q.05_peak_52269	chr16	14031340	14032234
wt_h3k4me1.q.05_peak_14475	chr10	69636766	69638846
wt_h3k4me1.q.05_peak_35971	chr13	58983769	58984440
wt_h3k4me1.q.05_peak_53507	chr16	34223367	34225199
wt_h3k4me1.q.05_peak_116652	chr7	92282140	92285550
wt_h3k4me1.q.05_peak_130629	chr9	73272227	73275022
wt_h3k4me1.q.05_peak_8505	chr1	160628230	160630052
wt_h3k4me1.q.05_peak_10537	chr1	191638359	191640040
wt_h3k4me1.q.05_peak_23014	chr11	78793677	78793993
wt_h3k4me1.q.05_peak_58537	chr17	47218862	47220437
wt_h3k4me1.q.05_peak_47812	chr15	53256885	53260587
wt_h3k4me1.q.05_peak_104214	chr5	137036029	137037034
wt_h3k4me1.q.05_peak_317	chr1	11587846	11589220
wt_h3k4me1.q.05_peak_44962	chr14	120118880	120120068
wt_h3k4me1.q.05_peak_75918	chr2	114590510	114591562
wt_h3k4me1.q.05_peak_47511	chr15	44711462	44712204
wt_h3k4me1.q.05_peak_114582	chr7	47115438	47116091
wt_h3k4me1.q.05_peak_76737	chr2	127534873	127537927
wt_h3k4me1.q.05_peak_21256	chr11	53424874	53426093
wt_h3k4me1.q.05_peak_74753	chr2	92845024	92845852
wt_h3k4me1.q.05_peak_65370	chr18	72319876	72320816
wt_h3k4me1.q.05_peak_2903	chr1	57799220	57800014
wt_h3k4me1.q.05_peak_22097	chr11	66997494	66997835
wt_h3k4me1.q.05_peak_15117	chr10	78255339	78256103
wt_h3k4me1.q.05_peak_58913	chr17	55212964	55214903
wt_h3k4me1.q.05_peak_5729	chr1	111019804	111020812
wt_h3k4me1.q.05_peak_86306	chr3	124073313	124076927
wt_h3k4me1.q.05_peak_44498	chr14	105672205	105672953
wt_h3k4me1.q.05_peak_112006	chr6	124673300	124674113
wt_h3k4me1.q.05_peak_111595	chr6	117301792	117303166
wt_h3k4me1.q.05_peak_44966	chr14	120140945	120141560
wt_h3k4me1.q.05_peak_10688	chr1	193042358	193043230
wt_h3k4me1.q.05_peak_123144	chr8	74890778	74893124
wt_h3k4me1.q.05_peak_40808	chr14	28979631	28980388
wt_h3k4me1.q.05_peak_69125	chr19	55177576	55177915
wt_h3k4me1.q.05_peak_116190	chr7	83014982	83017575
wt_h3k4me1.q.05_peak_22184	chr11	67642632	67644973
wt_h3k4me1.q.05_peak_78976	chr2	160715159	160716783
wt_h3k4me1.q.05_peak_36730	chr13	76932551	76932808
wt_h3k4me1.q.05_peak_38379	chr13	104968798	104970463
wt_h3k4me1.q.05_peak_82544	chr3	55391708	55393470
wt_h3k4me1.q.05_peak_51889	chr16	8883500	8884080
wt_h3k4me1.q.05_peak_102972	chr5	119477883	119479528
wt_h3k4me1.q.05_peak_125782	chr8	121773772	121774770
wt_h3k4me1.q.05_peak_26507	chr12	8470322	8472921
wt_h3k4me1.q.05_peak_124786	chr8	105811270	105811829
wt_h3k4me1.q.05_peak_121556	chr8	41384349	41385368
wt_h3k4me1.q.05_peak_99009	chr5	44146879	44148666
wt_h3k4me1.q.05_peak_109058	chr6	83408289	83421139
wt_h3k4me1.q.05_peak_120240	chr8	15599921	15600800
wt_h3k4me1.q.05_peak_62330	chr18	25711655	25716768
wt_h3k4me1.q.05_peak_27161	chr12	25579231	25579751
wt_h3k4me1.q.05_peak_14324	chr10	67482222	67484171
wt_h3k4me1.q.05_peak_93961	chr4	114514961	114516650
wt_h3k4me1.q.05_peak_103338	chr5	124241069	124243512
wt_h3k4me1.q.05_peak_16995	chr10	108740315	108742247
wt_h3k4me1.q.05_peak_100423	chr5	73241668	73242482
wt_h3k4me1.q.05_peak_108439	chr6	67186796	67187262
wt_h3k4me1.q.05_peak_118197	chr7	122316206	122317394
wt_h3k4me1.q.05_peak_70075	chr2	10754868	10756107
wt_h3k4me1.q.05_peak_18238	chr10	127198644	127199227
wt_h3k4me1.q.05_peak_87258	chr3	141050919	141052350
wt_h3k4me1.q.05_peak_73028	chr2	62922274	62924487
wt_h3k4me1.q.05_peak_53493	chr16	34183201	34183677
wt_h3k4me1.q.05_peak_55493	chr16	77405243	77405820
wt_h3k4me1.q.05_peak_54301	chr16	45399933	45400990
wt_h3k4me1.q.05_peak_55336	chr16	74396591	74397180
wt_h3k4me1.q.05_peak_39310	chr14	7846585	7848914
wt_h3k4me1.q.05_peak_97507	chr5	20624800	20626105
wt_h3k4me1.q.05_peak_56411	chr16	95831363	95832870
wt_h3k4me1.q.05_peak_118797	chr7	132719841	132722025
wt_h3k4me1.q.05_peak_65580	chr18	75543275	75543567
wt_h3k4me1.q.05_peak_105318	chr6	8409547	8410125
wt_h3k4me1.q.05_peak_10409	chr1	189523037	189523520
wt_h3k4me1.q.05_peak_115153	chr7	63957433	63959363
wt_h3k4me1.q.05_peak_58918	chr17	55288645	55289627
wt_h3k4me1.q.05_peak_73188	chr2	65689162	65692657
wt_h3k4me1.q.05_peak_40198	chr14	21582575	21583806
wt_h3k4me1.q.05_peak_84098	chr3	85529603	85530706
wt_h3k4me1.q.05_peak_67118	chr19	17907798	17908243
wt_h3k4me1.q.05_peak_35334	chr13	51539744	51540590
wt_h3k4me1.q.05_peak_103995	chr5	133123658	133124972
wt_h3k4me1.q.05_peak_13733	chr10	58293673	58294733
wt_h3k4me1.q.05_peak_34892	chr13	45239026	45239813
wt_h3k4me1.q.05_peak_37817	chr13	97668818	97669625
wt_h3k4me1.q.05_peak_87508	chr3	144436178	144436665
wt_h3k4me1.q.05_peak_39568	chr14	11915330	11917934
wt_h3k4me1.q.05_peak_33776	chr13	25725322	25725723
wt_h3k4me1.q.05_peak_86181	chr3	122487164	122488689
wt_h3k4me1.q.05_peak_45839	chr15	12903902	12905300
wt_h3k4me1.q.05_peak_132906	chr9	113394260	113394740
wt_h3k4me1.q.05_peak_8207	chr1	157518110	157520359
wt_h3k4me1.q.05_peak_7163	chr1	137669299	137669844
wt_h3k4me1.q.05_peak_121233	chr8	35641975	35644618
wt_h3k4me1.q.05_peak_17576	chr10	116562403	116563302
wt_h3k4me1.q.05_peak_59719	chr17	70489699	70492680
wt_h3k4me1.q.05_peak_129892	chr9	62361087	62361447
wt_h3k4me1.q.05_peak_20250	chr11	35581798	35583272
wt_h3k4me1.q.05_peak_87431	chr3	143508571	143509761
wt_h3k4me1.q.05_peak_129073	chr9	50063805	50064110
wt_h3k4me1.q.05_peak_104860	chr5	148131065	148132238
wt_h3k4me1.q.05_peak_17242	chr10	110618900	110619632
wt_h3k4me1.q.05_peak_67209	chr19	20529792	20531215
wt_h3k4me1.q.05_peak_34134	chr13	34286763	34287929
wt_h3k4me1.q.05_peak_62897	chr18	35913436	35914206
wt_h3k4me1.q.05_peak_6139	chr1	124871130	124871720
wt_h3k4me1.q.05_peak_43533	chr14	77583730	77585643
wt_h3k4me1.q.05_peak_68889	chr19	48823017	48824408
wt_h3k4me1.q.05_peak_103643	chr5	128361718	128362443
wt_h3k4me1.q.05_peak_45181	chr14	121604156	121606183
wt_h3k4me1.q.05_peak_63	chr1	4392151	4393057
wt_h3k4me1.q.05_peak_82654	chr3	56362469	56363498
wt_h3k4me1.q.05_peak_22320	chr11	69265705	69266361
wt_h3k4me1.q.05_peak_112030	chr6	124817720	124818839
wt_h3k4me1.q.05_peak_70731	chr2	24087429	24088024
wt_h3k4me1.q.05_peak_61706	chr18	15493939	15494213
wt_h3k4me1.q.05_peak_105708	chr6	18383973	18387368
wt_h3k4me1.q.05_peak_88463	chr3	159884678	159887166
wt_h3k4me1.q.05_peak_34700	chr13	43066380	43068275
wt_h3k4me1.q.05_peak_9454	chr1	175120427	175121794
wt_h3k4me1.q.05_peak_42414	chr14	62621915	62623019
wt_h3k4me1.q.05_peak_99531	chr5	53278772	53279896
wt_h3k4me1.q.05_peak_53069	chr16	28885181	28886762
wt_h3k4me1.q.05_peak_41296	chr14	35552745	35555132
wt_h3k4me1.q.05_peak_95653	chr4	139245552	139247599
wt_h3k4me1.q.05_peak_88227	chr3	156798437	156799514
wt_h3k4me1.q.05_peak_1926	chr1	39917301	39917576
wt_h3k4me1.q.05_peak_136142	chrX	162589770	162591790
wt_h3k4me1.q.05_peak_85316	chr3	105752423	105753353
wt_h3k4me1.q.05_peak_87914	chr3	152418685	152418995
wt_h3k4me1.q.05_peak_127600	chr9	29315356	29320441
wt_h3k4me1.q.05_peak_113234	chr6	145308244	145310052
wt_h3k4me1.q.05_peak_133537	chr9	122659152	122660726
wt_h3k4me1.q.05_peak_105088	chr5	151174826	151175474
wt_h3k4me1.q.05_peak_132944	chr9	113825578	113828336
wt_h3k4me1.q.05_peak_44824	chr14	117922981	117924478
wt_h3k4me1.q.05_peak_72151	chr2	47822451	47823901
wt_h3k4me1.q.05_peak_36097	chr13	60487898	60489222
wt_h3k4me1.q.05_peak_49433	chr15	77229395	77230449
wt_h3k4me1.q.05_peak_48682	chr15	66961588	66962918
wt_h3k4me1.q.05_peak_77488	chr2	136808922	136809242
wt_h3k4me1.q.05_peak_109766	chr6	92393798	92402524
wt_h3k4me1.q.05_peak_106112	chr6	28552924	28556118
wt_h3k4me1.q.05_peak_44651	chr14	112028218	112030606
wt_h3k4me1.q.05_peak_28030	chr12	38597979	38598726
wt_h3k4me1.q.05_peak_87557	chr3	144694646	144696271
wt_h3k4me1.q.05_peak_111770	chr6	119335056	119335422
wt_h3k4me1.q.05_peak_123524	chr8	83194788	83196949
wt_h3k4me1.q.05_peak_90444	chr4	46667898	46669679
wt_h3k4me1.q.05_peak_75506	chr2	106511267	106513161
wt_h3k4me1.q.05_peak_79969	chr2	178235514	178236080
wt_h3k4me1.q.05_peak_118432	chr7	125952319	125952600
wt_h3k4me1.q.05_peak_8002	chr1	155251615	155253561
wt_h3k4me1.q.05_peak_127658	chr9	29794676	29795734
wt_h3k4me1.q.05_peak_40992	chr14	31410626	31411404
wt_h3k4me1.q.05_peak_46295	chr15	27308516	27309239
wt_h3k4me1.q.05_peak_48037	chr15	57819917	57821356
wt_h3k4me1.q.05_peak_41786	chr14	49045892	49046326
wt_h3k4me1.q.05_peak_127289	chr9	26625603	26626650
wt_h3k4me1.q.05_peak_68724	chr19	46645219	46645910
wt_h3k4me1.q.05_peak_98328	chr5	33362093	33363842
wt_h3k4me1.q.05_peak_110436	chr6	101309777	101311036
wt_h3k4me1.q.05_peak_70633	chr2	21378650	21380241
wt_h3k4me1.q.05_peak_56704	chr17	5210102	5213388
wt_h3k4me1.q.05_peak_47543	chr15	45016104	45019313
wt_h3k4me1.q.05_peak_133340	chr9	120883413	120885665
wt_h3k4me1.q.05_peak_46404	chr15	27951177	27956678
wt_h3k4me1.q.05_peak_131464	chr9	92930479	92931142
wt_h3k4me1.q.05_peak_59694	chr17	70361369	70364460
wt_h3k4me1.q.05_peak_1821	chr1	38846871	38849482
wt_h3k4me1.q.05_peak_40687	chr14	27669630	27670716
wt_h3k4me1.q.05_peak_77277	chr2	135087027	135088537
wt_h3k4me1.q.05_peak_73751	chr2	73346115	73347709
wt_h3k4me1.q.05_peak_1893	chr1	39554655	39558326
wt_h3k4me1.q.05_peak_29370	chr12	70271857	70272262
wt_h3k4me1.q.05_peak_47601	chr15	48567998	48569816
wt_h3k4me1.q.05_peak_79198	chr2	163696861	163697350
wt_h3k4me1.q.05_peak_27441	chr12	29628734	29630754
wt_h3k4me1.q.05_peak_115797	chr7	75286744	75287255
wt_h3k4me1.q.05_peak_1101	chr1	25642413	25643236
wt_h3k4me1.q.05_peak_130439	chr9	70290715	70291569
wt_h3k4me1.q.05_peak_14922	chr10	75851188	75851472
wt_h3k4me1.q.05_peak_83537	chr3	79112806	79113715
wt_h3k4me1.q.05_peak_45722	chr15	12110934	12112234
wt_h3k4me1.q.05_peak_87074	chr3	137977633	137977999
wt_h3k4me1.q.05_peak_72517	chr2	53604850	53606397
wt_h3k4me1.q.05_peak_47859	chr15	53728778	53729627
wt_h3k4me1.q.05_peak_95270	chr4	134585628	134586880
wt_h3k4me1.q.05_peak_76926	chr2	130495186	130497470
wt_h3k4me1.q.05_peak_88392	chr3	158368286	158370036
wt_h3k4me1.q.05_peak_40670	chr14	27444327	27445892
wt_h3k4me1.q.05_peak_124585	chr8	102729687	102730473
wt_h3k4me1.q.05_peak_16906	chr10	108256924	108257347
wt_h3k4me1.q.05_peak_95568	chr4	138561976	138563406
wt_h3k4me1.q.05_peak_71883	chr2	41280328	41281756
wt_h3k4me1.q.05_peak_37923	chr13	98894387	98898002
wt_h3k4me1.q.05_peak_85530	chr3	108304430	108309695
wt_h3k4me1.q.05_peak_13825	chr10	59093175	59095358
wt_h3k4me1.q.05_peak_89443	chr4	24792841	24794742
wt_h3k4me1.q.05_peak_35022	chr13	46364363	46364742
wt_h3k4me1.q.05_peak_34994	chr13	46038318	46039771
wt_h3k4me1.q.05_peak_50714	chr15	93544267	93544776
wt_h3k4me1.q.05_peak_110401	chr6	101172007	101173926
wt_h3k4me1.q.05_peak_125914	chr8	123027916	123029017
wt_h3k4me1.q.05_peak_62825	chr18	35293630	35294691
wt_h3k4me1.q.05_peak_12487	chr10	29216409	29218711
wt_h3k4me1.q.05_peak_5830	chr1	117247867	117248669
wt_h3k4me1.q.05_peak_101757	chr5	102123146	102123788
wt_h3k4me1.q.05_peak_34320	chr13	37157822	37159885
wt_h3k4me1.q.05_peak_120866	chr8	28719684	28721420
wt_h3k4me1.q.05_peak_117489	chr7	111301183	111302850
wt_h3k4me1.q.05_peak_40247	chr14	21842092	21842931
wt_h3k4me1.q.05_peak_12773	chr10	37691923	37692552
wt_h3k4me1.q.05_peak_108394	chr6	66900076	66900508
wt_h3k4me1.q.05_peak_84693	chr3	96759452	96760052
wt_h3k4me1.q.05_peak_83254	chr3	69361025	69363594
wt_h3k4me1.q.05_peak_78024	chr2	145232369	145235050
wt_h3k4me1.q.05_peak_51194	chr15	100107842	100110388
wt_h3k4me1.q.05_peak_43361	chr14	75983555	75985813
wt_h3k4me1.q.05_peak_105042	chr5	150298115	150299471
wt_h3k4me1.q.05_peak_35397	chr13	52099838	52100956
wt_h3k4me1.q.05_peak_132840	chr9	112733947	112735934
wt_h3k4me1.q.05_peak_118664	chr7	130719506	130720099
wt_h3k4me1.q.05_peak_130052	chr9	64220754	64222236
wt_h3k4me1.q.05_peak_19443	chr11	22844317	22848432
wt_h3k4me1.q.05_peak_129740	chr9	60167196	60167502
wt_h3k4me1.q.05_peak_63749	chr18	47094533	47095521
wt_h3k4me1.q.05_peak_69334	chr19	57857762	57858221
wt_h3k4me1.q.05_peak_85920	chr3	117839497	117840510
wt_h3k4me1.q.05_peak_17067	chr10	109090868	109091122
wt_h3k4me1.q.05_peak_102796	chr5	117443312	117444797
wt_h3k4me1.q.05_peak_24148	chr11	97159871	97161294
wt_h3k4me1.q.05_peak_34563	chr13	42592194	42594584
wt_h3k4me1.q.05_peak_105436	chr6	12072722	12074122
wt_h3k4me1.q.05_peak_47274	chr15	40922361	40922740
wt_h3k4me1.q.05_peak_22987	chr11	78644761	78646396
wt_h3k4me1.q.05_peak_106800	chr6	36815537	36816695
wt_h3k4me1.q.05_peak_46201	chr15	25684751	25685805
wt_h3k4me1.q.05_peak_95057	chr4	131405497	131406873
wt_h3k4me1.q.05_peak_126657	chr9	12597614	12598739
wt_h3k4me1.q.05_peak_93351	chr4	103146129	103146720
wt_h3k4me1.q.05_peak_43228	chr14	74452784	74453074
wt_h3k4me1.q.05_peak_30984	chr12	97048027	97048482
wt_h3k4me1.q.05_peak_16445	chr10	98804773	98805636
wt_h3k4me1.q.05_peak_50498	chr15	90149313	90149963
wt_h3k4me1.q.05_peak_112572	chr6	135891695	135893063
wt_h3k4me1.q.05_peak_94225	chr4	119860138	119862481
wt_h3k4me1.q.05_peak_40904	chr14	30271562	30276170
wt_h3k4me1.q.05_peak_40164	chr14	21313667	21315366
wt_h3k4me1.q.05_peak_23664	chr11	88235626	88236296
wt_h3k4me1.q.05_peak_6804	chr1	133863050	133863915
wt_h3k4me1.q.05_peak_91924	chr4	76786587	76787864
wt_h3k4me1.q.05_peak_128673	chr9	45381889	45382891
wt_h3k4me1.q.05_peak_92159	chr4	82390773	82393313
wt_h3k4me1.q.05_peak_54073	chr16	42015558	42015923
wt_h3k4me1.q.05_peak_67404	chr19	23645511	23646225
wt_h3k4me1.q.05_peak_32154	chr12	111694144	111696246
wt_h3k4me1.q.05_peak_26754	chr12	13208981	13210886
wt_h3k4me1.q.05_peak_54555	chr16	52019366	52022084
wt_h3k4me1.q.05_peak_42956	chr14	69948512	69950159
wt_h3k4me1.q.05_peak_134172	chrX	41325528	41326904
wt_h3k4me1.q.05_peak_65579	chr18	75537580	75538526
wt_h3k4me1.q.05_peak_38192	chr13	102625259	102625974
wt_h3k4me1.q.05_peak_25350	chr11	113135251	113135773
wt_h3k4me1.q.05_peak_116809	chr7	96565500	96567451
wt_h3k4me1.q.05_peak_108072	chr6	57744852	57745999
wt_h3k4me1.q.05_peak_116406	chr7	89540316	89542757
wt_h3k4me1.q.05_peak_103675	chr5	128809601	128812449
wt_h3k4me1.q.05_peak_126369	chr8	128168426	128169986
wt_h3k4me1.q.05_peak_23327	chr11	82664337	82664677
wt_h3k4me1.q.05_peak_83207	chr3	68682962	68685560
wt_h3k4me1.q.05_peak_116499	chr7	91161286	91162277
wt_h3k4me1.q.05_peak_64660	chr18	62531456	62532427
wt_h3k4me1.q.05_peak_121555	chr8	41379146	41380582
wt_h3k4me1.q.05_peak_27755	chr12	33224000	33226696
wt_h3k4me1.q.05_peak_65981	chr18	80807951	80809878
wt_h3k4me1.q.05_peak_93626	chr4	106785111	106790425
wt_h3k4me1.q.05_peak_103067	chr5	121157921	121158737
wt_h3k4me1.q.05_peak_96485	chr4	153356069	153357128
wt_h3k4me1.q.05_peak_44987	chr14	120305671	120308726
wt_h3k4me1.q.05_peak_17548	chr10	116402712	116406350
wt_h3k4me1.q.05_peak_76796	chr2	128916370	128917592
wt_h3k4me1.q.05_peak_124212	chr8	93911193	93913139
wt_h3k4me1.q.05_peak_70132	chr2	12170068	12170796
wt_h3k4me1.q.05_peak_120352	chr8	17016831	17020646
wt_h3k4me1.q.05_peak_56907	chr17	8647058	8648413
wt_h3k4me1.q.05_peak_132341	chr9	106326806	106329515
wt_h3k4me1.q.05_peak_128865	chr9	47650058	47650883
wt_h3k4me1.q.05_peak_110475	chr6	101518925	101520074
wt_h3k4me1.q.05_peak_53485	chr16	34165470	34166240
wt_h3k4me1.q.05_peak_96088	chr4	149282911	149283686
wt_h3k4me1.q.05_peak_110321	chr6	100127275	100128487
wt_h3k4me1.q.05_peak_6693	chr1	132714380	132720299
wt_h3k4me1.q.05_peak_42700	chr14	65544269	65545860
wt_h3k4me1.q.05_peak_30327	chr12	83177785	83179374
wt_h3k4me1.q.05_peak_90471	chr4	46811318	46811632
wt_h3k4me1.q.05_peak_50062	chr15	84208842	84210405
wt_h3k4me1.q.05_peak_132516	chr9	108156824	108159887
wt_h3k4me1.q.05_peak_95755	chr4	140469273	140470977
wt_h3k4me1.q.05_peak_123494	chr8	82964017	82966811
wt_h3k4me1.q.05_peak_10818	chr1	194674571	194677432
wt_h3k4me1.q.05_peak_31652	chr12	105472964	105474594
wt_h3k4me1.q.05_peak_134006	chrX	19219531	19220090
wt_h3k4me1.q.05_peak_43093	chr14	71728220	71728581
wt_h3k4me1.q.05_peak_103493	chr5	125633526	125633861
wt_h3k4me1.q.05_peak_7651	chr1	151998358	152001344
wt_h3k4me1.q.05_peak_18935	chr11	12291002	12292746
wt_h3k4me1.q.05_peak_62227	chr18	24877305	24878994
wt_h3k4me1.q.05_peak_38668	chr13	109388431	109389675
wt_h3k4me1.q.05_peak_59901	chr17	72996995	72997841
wt_h3k4me1.q.05_peak_27008	chr12	17423596	17424151
wt_h3k4me1.q.05_peak_79503	chr2	167009540	167011315
wt_h3k4me1.q.05_peak_24613	chr11	103042741	103043290
wt_h3k4me1.q.05_peak_23088	chr11	79652234	79654104
wt_h3k4me1.q.05_peak_69975	chr2	7358481	7360332
wt_h3k4me1.q.05_peak_62359	chr18	25896660	25898817
wt_h3k4me1.q.05_peak_129896	chr9	62415977	62416273
wt_h3k4me1.q.05_peak_34660	chr13	42942091	42944752
wt_h3k4me1.q.05_peak_76730	chr2	127503235	127505937
wt_h3k4me1.q.05_peak_196	chr1	9173629	9173949
wt_h3k4me1.q.05_peak_99276	chr5	49255466	49257543
wt_h3k4me1.q.05_peak_110593	chr6	103676085	103677494
wt_h3k4me1.q.05_peak_83009	chr3	65174189	65176412
wt_h3k4me1.q.05_peak_17431	chr10	114462633	114464549
wt_h3k4me1.q.05_peak_29424	chr12	70695410	70699696
wt_h3k4me1.q.05_peak_73602	chr2	71303292	71303589
wt_h3k4me1.q.05_peak_101748	chr5	102054419	102057705
wt_h3k4me1.q.05_peak_60289	chr17	80840687	80841543
wt_h3k4me1.q.05_peak_32681	chr13	6128874	6129247
wt_h3k4me1.q.05_peak_31323	chr12	100770655	100773609
wt_h3k4me1.q.05_peak_690	chr1	20759361	20760453
wt_h3k4me1.q.05_peak_21105	chr11	51335760	51338727
wt_h3k4me1.q.05_peak_45343	chr14	124613582	124616170
wt_h3k4me1.q.05_peak_31296	chr12	100485411	100486377
wt_h3k4me1.q.05_peak_25432	chr11	113882891	113885107
wt_h3k4me1.q.05_peak_63627	chr18	45579144	45579964
wt_h3k4me1.q.05_peak_61508	chr18	12200219	12200489
wt_h3k4me1.q.05_peak_49083	chr15	73191353	73193239
wt_h3k4me1.q.05_peak_78245	chr2	149544853	149546121
wt_h3k4me1.q.05_peak_124069	chr8	91329308	91332742
wt_h3k4me1.q.05_peak_81033	chr3	25828603	25829013
wt_h3k4me1.q.05_peak_100875	chr5	81781680	81782501
wt_h3k4me1.q.05_peak_115122	chr7	63637509	63638112
wt_h3k4me1.q.05_peak_20116	chr11	33782453	33782956
wt_h3k4me1.q.05_peak_109785	chr6	92459591	92466902
wt_h3k4me1.q.05_peak_96390	chr4	152226232	152228688
wt_h3k4me1.q.05_peak_67828	chr19	30111970	30112365
wt_h3k4me1.q.05_peak_86473	chr3	127293043	127296570
wt_h3k4me1.q.05_peak_1113	chr1	25696852	25700047
wt_h3k4me1.q.05_peak_101349	chr5	93148722	93153473
wt_h3k4me1.q.05_peak_36100	chr13	60519317	60520381
wt_h3k4me1.q.05_peak_98454	chr5	35147873	35148353
wt_h3k4me1.q.05_peak_124341	chr8	95425783	95430994
wt_h3k4me1.q.05_peak_76448	chr2	121916494	121917120
wt_h3k4me1.q.05_peak_52479	chr16	18152032	18152655
wt_h3k4me1.q.05_peak_115482	chr7	68039685	68040505
wt_h3k4me1.q.05_peak_127633	chr9	29561711	29563996
wt_h3k4me1.q.05_peak_101083	chr5	89055536	89057096
wt_h3k4me1.q.05_peak_80492	chr3	9794269	9796207
wt_h3k4me1.q.05_peak_74052	chr2	77897290	77898452
wt_h3k4me1.q.05_peak_31316	chr12	100639695	100640795
wt_h3k4me1.q.05_peak_15534	chr10	84895704	84898292
wt_h3k4me1.q.05_peak_34845	chr13	44746258	44749089
wt_h3k4me1.q.05_peak_94593	chr4	125686885	125688105
wt_h3k4me1.q.05_peak_89998	chr4	38848197	38848894
wt_h3k4me1.q.05_peak_66147	chr18	83660600	83662193
wt_h3k4me1.q.05_peak_83185	chr3	68528640	68530308
wt_h3k4me1.q.05_peak_16739	chr10	105836214	105836867
wt_h3k4me1.q.05_peak_112476	chr6	135227583	135230083
wt_h3k4me1.q.05_peak_10085	chr1	182907336	182908855
wt_h3k4me1.q.05_peak_79926	chr2	174342807	174345021
wt_h3k4me1.q.05_peak_50481	chr15	89623221	89623483
wt_h3k4me1.q.05_peak_56826	chr17	7151586	7153345
wt_h3k4me1.q.05_peak_128291	chr9	41063551	41064829
wt_h3k4me1.q.05_peak_40465	chr14	24577994	24580429
wt_h3k4me1.q.05_peak_126401	chr8	128679753	128680482
wt_h3k4me1.q.05_peak_31412	chr12	102249658	102252571
wt_h3k4me1.q.05_peak_26616	chr12	11364827	11365570
wt_h3k4me1.q.05_peak_5124	chr1	92384010	92384577
wt_h3k4me1.q.05_peak_95509	chr4	138104461	138105768
wt_h3k4me1.q.05_peak_72824	chr2	60082820	60084105
wt_h3k4me1.q.05_peak_39491	chr14	10977800	10979289
wt_h3k4me1.q.05_peak_116522	chr7	91300669	91301016
wt_h3k4me1.q.05_peak_70504	chr2	19752553	19753607
wt_h3k4me1.q.05_peak_70022	chr2	8498054	8499309
wt_h3k4me1.q.05_peak_134761	chrX	77477084	77478110
wt_h3k4me1.q.05_peak_55363	chr16	74905542	74907536
wt_h3k4me1.q.05_peak_94443	chr4	123634894	123635590
wt_h3k4me1.q.05_peak_21026	chr11	50084554	50087752
wt_h3k4me1.q.05_peak_24611	chr11	103041005	103041615
wt_h3k4me1.q.05_peak_131660	chr9	96611937	96612495
wt_h3k4me1.q.05_peak_17019	chr10	108850343	108854377
wt_h3k4me1.q.05_peak_127129	chr9	23579387	23581147
wt_h3k4me1.q.05_peak_118486	chr7	126746127	126746555
wt_h3k4me1.q.05_peak_83323	chr3	70097716	70098532
wt_h3k4me1.q.05_peak_113233	chr6	145306276	145307536
wt_h3k4me1.q.05_peak_59359	chr17	65170344	65171289
wt_h3k4me1.q.05_peak_81522	chr3	33350304	33352214
wt_h3k4me1.q.05_peak_73116	chr2	64887191	64887712
wt_h3k4me1.q.05_peak_120029	chr8	13664188	13665524
wt_h3k4me1.q.05_peak_6850	chr1	134240984	134242895
wt_h3k4me1.q.05_peak_80629	chr3	15089998	15090386
wt_h3k4me1.q.05_peak_130531	chr9	71896302	71898045
wt_h3k4me1.q.05_peak_81770	chr3	37804581	37806129
wt_h3k4me1.q.05_peak_59365	chr17	65299973	65300426
wt_h3k4me1.q.05_peak_114810	chr7	51981613	51983853
wt_h3k4me1.q.05_peak_51714	chr16	6647135	6647490
wt_h3k4me1.q.05_peak_73373	chr2	68320436	68321772
wt_h3k4me1.q.05_peak_48635	chr15	66488981	66490095
wt_h3k4me1.q.05_peak_64171	chr18	55638049	55641089
wt_h3k4me1.q.05_peak_86821	chr3	134014298	134016414
wt_h3k4me1.q.05_peak_92445	chr4	86233167	86234964
wt_h3k4me1.q.05_peak_103935	chr5	132135574	132136975
wt_h3k4me1.q.05_peak_72692	chr2	58530793	58531857
wt_h3k4me1.q.05_peak_78238	chr2	148879490	148880000
wt_h3k4me1.q.05_peak_78695	chr2	156562972	156564365
wt_h3k4me1.q.05_peak_115240	chr7	64779144	64782120
wt_h3k4me1.q.05_peak_55740	chr16	85020636	85021928
wt_h3k4me1.q.05_peak_103451	chr5	125325888	125326430
wt_h3k4me1.q.05_peak_25074	chr11	108257980	108260716
wt_h3k4me1.q.05_peak_106315	chr6	30716278	30717069
wt_h3k4me1.q.05_peak_54477	chr16	49919847	49920321
wt_h3k4me1.q.05_peak_28670	chr12	52474124	52474842
wt_h3k4me1.q.05_peak_108701	chr6	73644820	73647807
wt_h3k4me1.q.05_peak_46040	chr15	20712032	20712730
wt_h3k4me1.q.05_peak_40295	chr14	23424175	23425354
wt_h3k4me1.q.05_peak_61879	chr18	20696558	20696912
wt_h3k4me1.q.05_peak_117094	chr7	99956101	99958325
wt_h3k4me1.q.05_peak_8284	chr1	158422051	158423371
wt_h3k4me1.q.05_peak_23800	chr11	90520847	90522015
wt_h3k4me1.q.05_peak_61580	chr18	12871057	12872920
wt_h3k4me1.q.05_peak_95273	chr4	134600227	134602959
wt_h3k4me1.q.05_peak_45924	chr15	16797061	16798053
wt_h3k4me1.q.05_peak_39742	chr14	13915039	13916185
wt_h3k4me1.q.05_peak_72691	chr2	58530055	58530410
wt_h3k4me1.q.05_peak_50175	chr15	85404634	85405744
wt_h3k4me1.q.05_peak_136107	chrX	161925714	161926648
wt_h3k4me1.q.05_peak_83280	chr3	69501698	69502904
wt_h3k4me1.q.05_peak_92991	chr4	98452302	98453329
wt_h3k4me1.q.05_peak_120759	chr8	25806458	25806796
wt_h3k4me1.q.05_peak_84122	chr3	85733828	85735269
wt_h3k4me1.q.05_peak_69312	chr19	57546873	57547318
wt_h3k4me1.q.05_peak_86600	chr3	129639545	129642509
wt_h3k4me1.q.05_peak_37329	chr13	92041250	92042378
wt_h3k4me1.q.05_peak_77727	chr2	141586859	141588255
wt_h3k4me1.q.05_peak_64522	chr18	61138165	61139072
wt_h3k4me1.q.05_peak_31534	chr12	103357024	103359793
wt_h3k4me1.q.05_peak_99179	chr5	46201222	46203080
wt_h3k4me1.q.05_peak_125619	chr8	119952029	119953912
wt_h3k4me1.q.05_peak_31034	chr12	98052794	98053389
wt_h3k4me1.q.05_peak_105396	chr6	10782399	10783553
wt_h3k4me1.q.05_peak_73344	chr2	68034253	68036010
wt_h3k4me1.q.05_peak_48944	chr15	71541522	71543101
wt_h3k4me1.q.05_peak_88272	chr3	157154699	157156498
wt_h3k4me1.q.05_peak_95185	chr4	133297513	133300952
wt_h3k4me1.q.05_peak_54829	chr16	60006451	60007610
wt_h3k4me1.q.05_peak_71103	chr2	29438711	29440711
wt_h3k4me1.q.05_peak_10374	chr1	189116748	189117732
wt_h3k4me1.q.05_peak_92609	chr4	88155998	88160874
wt_h3k4me1.q.05_peak_36065	chr13	59833851	59834878
wt_h3k4me1.q.05_peak_43580	chr14	78232845	78233481
wt_h3k4me1.q.05_peak_28373	chr12	45010493	45014542
wt_h3k4me1.q.05_peak_22945	chr11	78152085	78153658
wt_h3k4me1.q.05_peak_29648	chr12	73984813	73986431
wt_h3k4me1.q.05_peak_21919	chr11	62997617	62998188
wt_h3k4me1.q.05_peak_32926	chr13	10170114	10170962
wt_h3k4me1.q.05_peak_22908	chr11	77824147	77826001
wt_h3k4me1.q.05_peak_133837	chrX	13046771	13047557
wt_h3k4me1.q.05_peak_69060	chr19	53751631	53752512
wt_h3k4me1.q.05_peak_126343	chr8	127674686	127677198
wt_h3k4me1.q.05_peak_119524	chr8	6010547	6011710
wt_h3k4me1.q.05_peak_123981	chr8	89871496	89874034
wt_h3k4me1.q.05_peak_60515	chr17	84270782	84271583
wt_h3k4me1.q.05_peak_91048	chr4	56879343	56879865
wt_h3k4me1.q.05_peak_54809	chr16	59566347	59570930
wt_h3k4me1.q.05_peak_62374	chr18	26115310	26115658
wt_h3k4me1.q.05_peak_13651	chr10	55043640	55044703
wt_h3k4me1.q.05_peak_40058	chr14	19952327	19954449
wt_h3k4me1.q.05_peak_25779	chr11	118157940	118159406
wt_h3k4me1.q.05_peak_107175	chr6	41089909	41091926
wt_h3k4me1.q.05_peak_105342	chr6	8658557	8660332
wt_h3k4me1.q.05_peak_46701	chr15	32277797	32279474
wt_h3k4me1.q.05_peak_66136	chr18	83399669	83401037
wt_h3k4me1.q.05_peak_106124	chr6	28618429	28619907
wt_h3k4me1.q.05_peak_47463	chr15	43773046	43773631
wt_h3k4me1.q.05_peak_127486	chr9	28452194	28453230
wt_h3k4me1.q.05_peak_14477	chr10	69647927	69648334
wt_h3k4me1.q.05_peak_4505	chr1	84419659	84419968
wt_h3k4me1.q.05_peak_64630	chr18	62168543	62170016
wt_h3k4me1.q.05_peak_16854	chr10	107419110	107419473
wt_h3k4me1.q.05_peak_72927	chr2	61986169	61988018
wt_h3k4me1.q.05_peak_118315	chr7	123287155	123288624
wt_h3k4me1.q.05_peak_85174	chr3	104203236	104203996
wt_h3k4me1.q.05_peak_86995	chr3	136911164	136912797
wt_h3k4me1.q.05_peak_64738	chr18	64166688	64167604
wt_h3k4me1.q.05_peak_68306	chr19	40358698	40362572
wt_h3k4me1.q.05_peak_118210	chr7	122367955	122368383
wt_h3k4me1.q.05_peak_20432	chr11	37810113	37810376
wt_h3k4me1.q.05_peak_128066	chr9	36949948	36951509
wt_h3k4me1.q.05_peak_70491	chr2	19540853	19541900
wt_h3k4me1.q.05_peak_15486	chr10	84088606	84089515
wt_h3k4me1.q.05_peak_80977	chr3	24850360	24851204
wt_h3k4me1.q.05_peak_95805	chr4	141175755	141177459
wt_h3k4me1.q.05_peak_118040	chr7	120035681	120036565
wt_h3k4me1.q.05_peak_35843	chr13	57688650	57689567
wt_h3k4me1.q.05_peak_89316	chr4	21247767	21248228
wt_h3k4me1.q.05_peak_59023	chr17	56536732	56537393
wt_h3k4me1.q.05_peak_16994	chr10	108737926	108739110
wt_h3k4me1.q.05_peak_46338	chr15	27591521	27593788
wt_h3k4me1.q.05_peak_27634	chr12	31890083	31891229
wt_h3k4me1.q.05_peak_58630	chr17	48886939	48888847
wt_h3k4me1.q.05_peak_45752	chr15	12243449	12247793
wt_h3k4me1.q.05_peak_109215	chr6	85479869	85483495
wt_h3k4me1.q.05_peak_82693	chr3	57343080	57345171
wt_h3k4me1.q.05_peak_43807	chr14	84540990	84542684
wt_h3k4me1.q.05_peak_25349	chr11	113132157	113134261
wt_h3k4me1.q.05_peak_86045	chr3	120092853	120093260
wt_h3k4me1.q.05_peak_35872	chr13	57868610	57873230
wt_h3k4me1.q.05_peak_76625	chr2	125402040	125403446
wt_h3k4me1.q.05_peak_76836	chr2	129408941	129409750
wt_h3k4me1.q.05_peak_77845	chr2	143216715	143218615
wt_h3k4me1.q.05_peak_42447	chr14	62892412	62893826
wt_h3k4me1.q.05_peak_102177	chr5	110507580	110508395
wt_h3k4me1.q.05_peak_89678	chr4	31999299	32001858
wt_h3k4me1.q.05_peak_81701	chr3	36537091	36539309
wt_h3k4me1.q.05_peak_34340	chr13	37392279	37393469
wt_h3k4me1.q.05_peak_53651	chr16	35248309	35249083
wt_h3k4me1.q.05_peak_47311	chr15	41484380	41485506
wt_h3k4me1.q.05_peak_127610	chr9	29376864	29379995
wt_h3k4me1.q.05_peak_41581	chr14	45549193	45551464
wt_h3k4me1.q.05_peak_49190	chr15	74049502	74050962
wt_h3k4me1.q.05_peak_130811	chr9	77175108	77176330
wt_h3k4me1.q.05_peak_29447	chr12	70881315	70882509
wt_h3k4me1.q.05_peak_117330	chr7	105561682	105562942
wt_h3k4me1.q.05_peak_15353	chr10	81411568	81412810
wt_h3k4me1.q.05_peak_84088	chr3	85433140	85434027
wt_h3k4me1.q.05_peak_132435	chr9	107256910	107257176
wt_h3k4me1.q.05_peak_26391	chr12	5757077	5758391
wt_h3k4me1.q.05_peak_52722	chr16	22494360	22495749
wt_h3k4me1.q.05_peak_71465	chr2	33317652	33319540
wt_h3k4me1.q.05_peak_18662	chr11	6075453	6076337
wt_h3k4me1.q.05_peak_109179	chr6	85205930	85207273
wt_h3k4me1.q.05_peak_50485	chr15	89733278	89734313
wt_h3k4me1.q.05_peak_119076	chr7	139126574	139127342
wt_h3k4me1.q.05_peak_10745	chr1	193582843	193584848
wt_h3k4me1.q.05_peak_61660	chr18	14996316	14998597
wt_h3k4me1.q.05_peak_104664	chr5	144623035	144624810
wt_h3k4me1.q.05_peak_37111	chr13	85443615	85444600
wt_h3k4me1.q.05_peak_64752	chr18	64468205	64468644
wt_h3k4me1.q.05_peak_32927	chr13	10172315	10173986
wt_h3k4me1.q.05_peak_15777	chr10	89333587	89334967
wt_h3k4me1.q.05_peak_37434	chr13	93211453	93212564
wt_h3k4me1.q.05_peak_81265	chr3	28612202	28614688
wt_h3k4me1.q.05_peak_33500	chr13	20480159	20482629
wt_h3k4me1.q.05_peak_115208	chr7	64585400	64586785
wt_h3k4me1.q.05_peak_50737	chr15	93689715	93691594
wt_h3k4me1.q.05_peak_107181	chr6	41129333	41130655
wt_h3k4me1.q.05_peak_33129	chr13	13576018	13577436
wt_h3k4me1.q.05_peak_76148	chr2	117416729	117418786
wt_h3k4me1.q.05_peak_58340	chr17	44650015	44652074
wt_h3k4me1.q.05_peak_103416	chr5	125133224	125135656
wt_h3k4me1.q.05_peak_97215	chr5	16086791	16088254
wt_h3k4me1.q.05_peak_104396	chr5	140264484	140265181
wt_h3k4me1.q.05_peak_125757	chr8	121635908	121637524
wt_h3k4me1.q.05_peak_133444	chr9	121808259	121809142
wt_h3k4me1.q.05_peak_62482	chr18	29949300	29952485
wt_h3k4me1.q.05_peak_108917	chr6	80704457	80706807
wt_h3k4me1.q.05_peak_12459	chr10	28692068	28692966
wt_h3k4me1.q.05_peak_30130	chr12	81229004	81229637
wt_h3k4me1.q.05_peak_20956	chr11	49208559	49209918
wt_h3k4me1.q.05_peak_97414	chr5	20109026	20110748
wt_h3k4me1.q.05_peak_87415	chr3	143287171	143287494
wt_h3k4me1.q.05_peak_51189	chr15	100091244	100093309
wt_h3k4me1.q.05_peak_92612	chr4	88195884	88197307
wt_h3k4me1.q.05_peak_71536	chr2	34445562	34446552
wt_h3k4me1.q.05_peak_19796	chr11	29773783	29774310
wt_h3k4me1.q.05_peak_128300	chr9	41136572	41137742
wt_h3k4me1.q.05_peak_101808	chr5	103093380	103094693
wt_h3k4me1.q.05_peak_60552	chr17	84747196	84748471
wt_h3k4me1.q.05_peak_14821	chr10	74952623	74954448
wt_h3k4me1.q.05_peak_117323	chr7	105501910	105502457
wt_h3k4me1.q.05_peak_7345	chr1	141999687	142000388
wt_h3k4me1.q.05_peak_35824	chr13	57564631	57565337
wt_h3k4me1.q.05_peak_55223	chr16	72501335	72501814
wt_h3k4me1.q.05_peak_119002	chr7	137674471	137676256
wt_h3k4me1.q.05_peak_116521	chr7	91298112	91298621
wt_h3k4me1.q.05_peak_45764	chr15	12360941	12363552
wt_h3k4me1.q.05_peak_110496	chr6	101994152	101995287
wt_h3k4me1.q.05_peak_115300	chr7	65413239	65415445
wt_h3k4me1.q.05_peak_91850	chr4	75970245	75970994
wt_h3k4me1.q.05_peak_97447	chr5	20296070	20297890
wt_h3k4me1.q.05_peak_109834	chr6	92699258	92700626
wt_h3k4me1.q.05_peak_92996	chr4	98540484	98544798
wt_h3k4me1.q.05_peak_90097	chr4	41028879	41029453
wt_h3k4me1.q.05_peak_89215	chr4	17982153	17986291
wt_h3k4me1.q.05_peak_132597	chr9	109813328	109814139
wt_h3k4me1.q.05_peak_106787	chr6	36771912	36772174
wt_h3k4me1.q.05_peak_37567	chr13	94505837	94508270
wt_h3k4me1.q.05_peak_47652	chr15	50735798	50736949
wt_h3k4me1.q.05_peak_102146	chr5	108645228	108646088
wt_h3k4me1.q.05_peak_7304	chr1	140428764	140430132
wt_h3k4me1.q.05_peak_30722	chr12	89023414	89024520
wt_h3k4me1.q.05_peak_61185	chr18	5319739	5320070
wt_h3k4me1.q.05_peak_14715	chr10	72353588	72354616
wt_h3k4me1.q.05_peak_20187	chr11	35147224	35147992
wt_h3k4me1.q.05_peak_115211	chr7	64620146	64620548
wt_h3k4me1.q.05_peak_71442	chr2	33185523	33187741
wt_h3k4me1.q.05_peak_1644	chr1	37287205	37289029
wt_h3k4me1.q.05_peak_16806	chr10	106815245	106815994
wt_h3k4me1.q.05_peak_33461	chr13	20206233	20206630
wt_h3k4me1.q.05_peak_14731	chr10	72743718	72745305
wt_h3k4me1.q.05_peak_80504	chr3	9896214	9897041
wt_h3k4me1.q.05_peak_70177	chr2	12896528	12897574
wt_h3k4me1.q.05_peak_101824	chr5	103175945	103179133
wt_h3k4me1.q.05_peak_114321	chr7	40761996	40763657
wt_h3k4me1.q.05_peak_32497	chr12	117661127	117662930
wt_h3k4me1.q.05_peak_51628	chr16	5924632	5925355
wt_h3k4me1.q.05_peak_25861	chr11	118680154	118681458
wt_h3k4me1.q.05_peak_84834	chr3	99104130	99105043
wt_h3k4me1.q.05_peak_122666	chr8	67861693	67862812
wt_h3k4me1.q.05_peak_46538	chr15	30587188	30587936
wt_h3k4me1.q.05_peak_63437	chr18	42780065	42782512
wt_h3k4me1.q.05_peak_8918	chr1	167057229	167058408
wt_h3k4me1.q.05_peak_85202	chr3	104480680	104482863
wt_h3k4me1.q.05_peak_62154	chr18	24151974	24153123
wt_h3k4me1.q.05_peak_118417	chr7	125772835	125773726
wt_h3k4me1.q.05_peak_129567	chr9	57802100	57803647
wt_h3k4me1.q.05_peak_27737	chr12	33130238	33131059
wt_h3k4me1.q.05_peak_107549	chr6	50312605	50320605
wt_h3k4me1.q.05_peak_119771	chr8	10419053	10419592
wt_h3k4me1.q.05_peak_112104	chr6	126433308	126434344
wt_h3k4me1.q.05_peak_25238	chr11	111060604	111061334
wt_h3k4me1.q.05_peak_78063	chr2	145619338	145620538
wt_h3k4me1.q.05_peak_22156	chr11	67555695	67556393
wt_h3k4me1.q.05_peak_94813	chr4	128418223	128419269
wt_h3k4me1.q.05_peak_110052	chr6	95904113	95905349
wt_h3k4me1.q.05_peak_38994	chr13	113486287	113487283
wt_h3k4me1.q.05_peak_95175	chr4	133174316	133175107
wt_h3k4me1.q.05_peak_12711	chr10	34911619	34912699
wt_h3k4me1.q.05_peak_123363	chr8	79371914	79374137
wt_h3k4me1.q.05_peak_88560	chr4	5772321	5773863
wt_h3k4me1.q.05_peak_78315	chr2	150830860	150831154
wt_h3k4me1.q.05_peak_108493	chr6	70457074	70457813
wt_h3k4me1.q.05_peak_7893	chr1	154529464	154530168
wt_h3k4me1.q.05_peak_26716	chr12	12682932	12683310
wt_h3k4me1.q.05_peak_43276	chr14	74913187	74915962
wt_h3k4me1.q.05_peak_63679	chr18	46066225	46067741
wt_h3k4me1.q.05_peak_109889	chr6	93735940	93738036
wt_h3k4me1.q.05_peak_126964	chr9	20971732	20972775
wt_h3k4me1.q.05_peak_69671	chr2	5194626	5195093
wt_h3k4me1.q.05_peak_77154	chr2	132745950	132746519
wt_h3k4me1.q.05_peak_132799	chr9	112194129	112194592
wt_h3k4me1.q.05_peak_119080	chr7	139135340	139138258
wt_h3k4me1.q.05_peak_110056	chr6	96000509	96001816
wt_h3k4me1.q.05_peak_29361	chr12	70247687	70249643
wt_h3k4me1.q.05_peak_61140	chr18	4614063	4614935
wt_h3k4me1.q.05_peak_1826	chr1	38971869	38973916
wt_h3k4me1.q.05_peak_399	chr1	13218015	13218430
wt_h3k4me1.q.05_peak_102192	chr5	110596728	110599385
wt_h3k4me1.q.05_peak_2515	chr1	52505636	52506579
wt_h3k4me1.q.05_peak_27803	chr12	34051773	34053810
wt_h3k4me1.q.05_peak_96424	chr4	152423285	152423735
wt_h3k4me1.q.05_peak_17417	chr10	113914407	113914797
wt_h3k4me1.q.05_peak_117450	chr7	110555001	110556207
wt_h3k4me1.q.05_peak_128138	chr9	37540977	37541290
wt_h3k4me1.q.05_peak_24154	chr11	97222587	97223246
wt_h3k4me1.q.05_peak_63002	chr18	37832278	37833187
wt_h3k4me1.q.05_peak_133347	chr9	120957749	120958564
wt_h3k4me1.q.05_peak_132961	chr9	113980777	113981988
wt_h3k4me1.q.05_peak_30450	chr12	85126164	85127464
wt_h3k4me1.q.05_peak_129906	chr9	62480587	62481764
wt_h3k4me1.q.05_peak_62107	chr18	23760389	23760716
wt_h3k4me1.q.05_peak_79941	chr2	178128871	178129771
wt_h3k4me1.q.05_peak_68670	chr19	45915712	45919208
wt_h3k4me1.q.05_peak_26578	chr12	10399705	10401625
wt_h3k4me1.q.05_peak_35414	chr13	52301956	52302774
wt_h3k4me1.q.05_peak_13003	chr10	40843318	40845690
wt_h3k4me1.q.05_peak_87293	chr3	141592889	141594822
wt_h3k4me1.q.05_peak_128665	chr9	45172448	45173970
wt_h3k4me1.q.05_peak_14350	chr10	67886190	67886771
wt_h3k4me1.q.05_peak_77470	chr2	136751678	136756404
wt_h3k4me1.q.05_peak_27635	chr12	31892703	31893178
wt_h3k4me1.q.05_peak_57724	chr17	28013017	28013689
wt_h3k4me1.q.05_peak_133003	chr9	115050217	115051306
wt_h3k4me1.q.05_peak_95713	chr4	140188043	140193058
wt_h3k4me1.q.05_peak_27900	chr12	35391711	35393126
wt_h3k4me1.q.05_peak_31516	chr12	103132887	103134801
wt_h3k4me1.q.05_peak_31438	chr12	102601752	102602200
wt_h3k4me1.q.05_peak_71174	chr2	30457845	30458586
wt_h3k4me1.q.05_peak_111238	chr6	113860363	113862883
wt_h3k4me1.q.05_peak_136145	chrX	162620388	162620876
wt_h3k4me1.q.05_peak_24294	chr11	98368748	98370194
wt_h3k4me1.q.05_peak_81530	chr3	33395370	33400700
wt_h3k4me1.q.05_peak_120858	chr8	28633799	28635107
wt_h3k4me1.q.05_peak_63953	chr18	51714204	51715646
wt_h3k4me1.q.05_peak_133946	chrX	17167945	17168354
wt_h3k4me1.q.05_peak_32568	chr12	119356969	119358424
wt_h3k4me1.q.05_peak_117979	chr7	118438745	118439611
wt_h3k4me1.q.05_peak_111136	chr6	112932733	112933890
wt_h3k4me1.q.05_peak_85524	chr3	108290271	108291798
wt_h3k4me1.q.05_peak_15488	chr10	84171471	84171783
wt_h3k4me1.q.05_peak_97716	chr5	23563183	23565103
wt_h3k4me1.q.05_peak_62850	chr18	35502005	35502795
wt_h3k4me1.q.05_peak_81266	chr3	28637663	28639803
wt_h3k4me1.q.05_peak_14426	chr10	69106466	69107416
wt_h3k4me1.q.05_peak_40284	chr14	23335442	23336355
wt_h3k4me1.q.05_peak_126371	chr8	128187491	128188261
wt_h3k4me1.q.05_peak_113489	chr6	149451198	149451523
wt_h3k4me1.q.05_peak_91315	chr4	62761064	62761607
wt_h3k4me1.q.05_peak_37000	chr13	83613422	83614489
wt_h3k4me1.q.05_peak_31266	chr12	100350818	100351128
wt_h3k4me1.q.05_peak_25428	chr11	113797018	113799616
wt_h3k4me1.q.05_peak_105013	chr5	150047606	150049748
wt_h3k4me1.q.05_peak_33903	chr13	29610074	29611459
wt_h3k4me1.q.05_peak_116493	chr7	91131535	91132011
wt_h3k4me1.q.05_peak_94662	chr4	126803807	126804239
wt_h3k4me1.q.05_peak_109466	chr6	88772018	88776046
wt_h3k4me1.q.05_peak_63915	chr18	50889240	50889812
wt_h3k4me1.q.05_peak_11538	chr10	13775467	13777053
wt_h3k4me1.q.05_peak_57611	chr17	26699569	26703861
wt_h3k4me1.q.05_peak_110405	chr6	101186512	101187986
wt_h3k4me1.q.05_peak_50756	chr15	93931777	93933655
wt_h3k4me1.q.05_peak_121686	chr8	45586617	45587693
wt_h3k4me1.q.05_peak_131581	chr9	95121108	95121565
wt_h3k4me1.q.05_peak_75598	chr2	108030091	108035281
wt_h3k4me1.q.05_peak_133914	chrX	14836188	14837315
wt_h3k4me1.q.05_peak_108356	chr6	65584605	65586547
wt_h3k4me1.q.05_peak_27570	chr12	30905750	30907861
wt_h3k4me1.q.05_peak_33265	chr13	16644827	16647296
wt_h3k4me1.q.05_peak_45959	chr15	18743673	18745132
wt_h3k4me1.q.05_peak_99025	chr5	44215591	44216153
wt_h3k4me1.q.05_peak_44481	chr14	105559418	105560256
wt_h3k4me1.q.05_peak_65455	chr18	74036591	74037193
wt_h3k4me1.q.05_peak_5583	chr1	106071500	106072364
wt_h3k4me1.q.05_peak_57775	chr17	28716180	28717659
wt_h3k4me1.q.05_peak_11074	chr10	6926369	6927924
wt_h3k4me1.q.05_peak_103466	chr5	125519591	125521348
wt_h3k4me1.q.05_peak_45751	chr15	12234354	12235409
wt_h3k4me1.q.05_peak_30498	chr12	85628006	85631190
wt_h3k4me1.q.05_peak_5182	chr1	93036002	93036536
wt_h3k4me1.q.05_peak_86166	chr3	122372108	122373644
wt_h3k4me1.q.05_peak_115131	chr7	63768455	63769270
wt_h3k4me1.q.05_peak_91578	chr4	68535768	68536748
wt_h3k4me1.q.05_peak_97924	chr5	26292837	26293911
wt_h3k4me1.q.05_peak_14958	chr10	76332807	76333059
wt_h3k4me1.q.05_peak_56796	chr17	6005565	6007233
wt_h3k4me1.q.05_peak_76921	chr2	130472437	130473016
wt_h3k4me1.q.05_peak_26857	chr12	15804262	15805646
wt_h3k4me1.q.05_peak_91469	chr4	65836861	65840462
wt_h3k4me1.q.05_peak_22215	chr11	67896947	67897411
wt_h3k4me1.q.05_peak_107918	chr6	55391143	55392620
wt_h3k4me1.q.05_peak_131882	chr9	99441182	99441794
wt_h3k4me1.q.05_peak_132521	chr9	108172741	108173054
wt_h3k4me1.q.05_peak_126834	chr9	16026120	16026702
wt_h3k4me1.q.05_peak_120569	chr8	23108545	23109381
wt_h3k4me1.q.05_peak_70127	chr2	12049110	12050065
wt_h3k4me1.q.05_peak_10583	chr1	192268003	192273233
wt_h3k4me1.q.05_peak_133539	chr9	122673718	122674608
wt_h3k4me1.q.05_peak_37939	chr13	99062568	99064039
wt_h3k4me1.q.05_peak_92064	chr4	80736371	80737145
wt_h3k4me1.q.05_peak_59062	chr17	57082407	57084533
wt_h3k4me1.q.05_peak_126824	chr9	15943035	15945401
wt_h3k4me1.q.05_peak_40128	chr14	20805148	20805727
wt_h3k4me1.q.05_peak_122850	chr8	70202558	70205216
wt_h3k4me1.q.05_peak_26361	chr12	5321802	5323402
wt_h3k4me1.q.05_peak_69897	chr2	6988991	6990695
wt_h3k4me1.q.05_peak_83718	chr3	80661799	80662682
wt_h3k4me1.q.05_peak_10787	chr1	194230779	194232298
wt_h3k4me1.q.05_peak_103366	chr5	124495964	124497143
wt_h3k4me1.q.05_peak_128727	chr9	45656197	45658615
wt_h3k4me1.q.05_peak_27445	chr12	29639150	29640193
wt_h3k4me1.q.05_peak_132828	chr9	112444135	112445180
wt_h3k4me1.q.05_peak_58198	chr17	37538298	37538969
wt_h3k4me1.q.05_peak_4310	chr1	81097021	81100198
wt_h3k4me1.q.05_peak_119591	chr8	8487819	8490231
wt_h3k4me1.q.05_peak_126381	chr8	128335772	128336362
wt_h3k4me1.q.05_peak_132669	chr9	110678585	110679120
wt_h3k4me1.q.05_peak_6497	chr1	131110572	131111398
wt_h3k4me1.q.05_peak_109002	chr6	82648113	82649676
wt_h3k4me1.q.05_peak_7641	chr1	151951923	151953875
wt_h3k4me1.q.05_peak_24924	chr11	106679770	106680462
wt_h3k4me1.q.05_peak_116126	chr7	81652682	81655623
wt_h3k4me1.q.05_peak_99052	chr5	44536391	44540418
wt_h3k4me1.q.05_peak_123770	chr8	86158417	86158894
wt_h3k4me1.q.05_peak_59477	chr17	66425641	66427563
wt_h3k4me1.q.05_peak_54084	chr16	42101738	42103860
wt_h3k4me1.q.05_peak_9090	chr1	169756708	169757370
wt_h3k4me1.q.05_peak_78973	chr2	160667555	160668942
wt_h3k4me1.q.05_peak_65830	chr18	78805725	78806539
wt_h3k4me1.q.05_peak_19945	chr11	31830187	31831699
wt_h3k4me1.q.05_peak_131782	chr9	97882742	97884060
wt_h3k4me1.q.05_peak_46147	chr15	24968336	24969024
wt_h3k4me1.q.05_peak_129657	chr9	58604909	58606976
wt_h3k4me1.q.05_peak_50114	chr15	84768564	84770377
wt_h3k4me1.q.05_peak_101634	chr5	100186914	100188504
wt_h3k4me1.q.05_peak_60347	chr17	81491231	81492585
wt_h3k4me1.q.05_peak_80848	chr3	21477037	21477430
wt_h3k4me1.q.05_peak_57531	chr17	25911076	25914815
wt_h3k4me1.q.05_peak_35351	chr13	51681551	51682399
wt_h3k4me1.q.05_peak_23994	chr11	94404076	94409047
wt_h3k4me1.q.05_peak_71972	chr2	43321691	43323848
wt_h3k4me1.q.05_peak_63211	chr18	39653710	39654839
wt_h3k4me1.q.05_peak_36678	chr13	76263307	76264829
wt_h3k4me1.q.05_peak_67599	chr19	26757625	26759448
wt_h3k4me1.q.05_peak_58896	chr17	54368379	54368691
wt_h3k4me1.q.05_peak_15096	chr10	77984929	77985294
wt_h3k4me1.q.05_peak_50493	chr15	90061920	90062797
wt_h3k4me1.q.05_peak_115367	chr7	66247308	66248181
wt_h3k4me1.q.05_peak_62174	chr18	24541140	24542055
wt_h3k4me1.q.05_peak_29769	chr12	75540190	75543491
wt_h3k4me1.q.05_peak_110545	chr6	102947201	102947882
wt_h3k4me1.q.05_peak_13727	chr10	57822284	57823126
wt_h3k4me1.q.05_peak_21456	chr11	56793012	56794049
wt_h3k4me1.q.05_peak_26963	chr12	17040157	17040635
wt_h3k4me1.q.05_peak_40708	chr14	27799579	27801900
wt_h3k4me1.q.05_peak_51896	chr16	8994634	8995310
wt_h3k4me1.q.05_peak_31238	chr12	100242519	100242962
wt_h3k4me1.q.05_peak_27860	chr12	34836694	34837584
wt_h3k4me1.q.05_peak_19406	chr11	22369470	22370552
wt_h3k4me1.q.05_peak_98434	chr5	35003424	35004601
wt_h3k4me1.q.05_peak_80067	chr2	179585337	179587644
wt_h3k4me1.q.05_peak_16012	chr10	91886389	91889738
wt_h3k4me1.q.05_peak_82501	chr3	55155270	55155579
wt_h3k4me1.q.05_peak_82671	chr3	56730647	56731550
wt_h3k4me1.q.05_peak_110156	chr6	98211080	98212574
wt_h3k4me1.q.05_peak_60219	chr17	80026159	80027029
wt_h3k4me1.q.05_peak_32700	chr13	6331995	6332302
wt_h3k4me1.q.05_peak_38432	chr13	105721621	105723174
wt_h3k4me1.q.05_peak_91624	chr4	68885452	68889032
wt_h3k4me1.q.05_peak_9157	chr1	170406537	170412768
wt_h3k4me1.q.05_peak_99589	chr5	54040029	54040761
wt_h3k4me1.q.05_peak_9456	chr1	175128032	175129627
wt_h3k4me1.q.05_peak_33089	chr13	12203856	12205109
wt_h3k4me1.q.05_peak_20277	chr11	35838781	35839255
wt_h3k4me1.q.05_peak_64285	chr18	57822675	57823519
wt_h3k4me1.q.05_peak_98654	chr5	37100167	37102651
wt_h3k4me1.q.05_peak_808	chr1	22260224	22260893
wt_h3k4me1.q.05_peak_21601	chr11	58796146	58797727
wt_h3k4me1.q.05_peak_65301	chr18	70520400	70521619
wt_h3k4me1.q.05_peak_55139	chr16	69447118	69448021
wt_h3k4me1.q.05_peak_41177	chr14	34467551	34467993
wt_h3k4me1.q.05_peak_94125	chr4	118084196	118085325
wt_h3k4me1.q.05_peak_74994	chr2	97284848	97285479
wt_h3k4me1.q.05_peak_37989	chr13	99459211	99460150
wt_h3k4me1.q.05_peak_112158	chr6	126773411	126774446
wt_h3k4me1.q.05_peak_77768	chr2	142402552	142405836
wt_h3k4me1.q.05_peak_44519	chr14	106011242	106012646
wt_h3k4me1.q.05_peak_112801	chr6	138388235	138388654
wt_h3k4me1.q.05_peak_69909	chr2	7062516	7063037
wt_h3k4me1.q.05_peak_112618	chr6	136056144	136058671
wt_h3k4me1.q.05_peak_90508	chr4	46925574	46925976
wt_h3k4me1.q.05_peak_65806	chr18	78491601	78492106
wt_h3k4me1.q.05_peak_79199	chr2	163698291	163700020
wt_h3k4me1.q.05_peak_51971	chr16	9822963	9825076
wt_h3k4me1.q.05_peak_71525	chr2	34030703	34031385
wt_h3k4me1.q.05_peak_45002	chr14	120341910	120344222
wt_h3k4me1.q.05_peak_71217	chr2	30735457	30735790
wt_h3k4me1.q.05_peak_18034	chr10	123143434	123150832
wt_h3k4me1.q.05_peak_117473	chr7	110988058	110991170
wt_h3k4me1.q.05_peak_26612	chr12	11346681	11351605
wt_h3k4me1.q.05_peak_14459	chr10	69574084	69575859
wt_h3k4me1.q.05_peak_48217	chr15	59635423	59636072
wt_h3k4me1.q.05_peak_129452	chr9	56469500	56470877
wt_h3k4me1.q.05_peak_132068	chr9	102725569	102726979
wt_h3k4me1.q.05_peak_128414	chr9	42427763	42428867
wt_h3k4me1.q.05_peak_53542	chr16	34372624	34374761
wt_h3k4me1.q.05_peak_78478	chr2	153305042	153305837
wt_h3k4me1.q.05_peak_66619	chr19	6523312	6525738
wt_h3k4me1.q.05_peak_99316	chr5	49553982	49555521
wt_h3k4me1.q.05_peak_14599	chr10	70505591	70506893
wt_h3k4me1.q.05_peak_61775	chr18	16715224	16717152
wt_h3k4me1.q.05_peak_53598	chr16	34643433	34644907
wt_h3k4me1.q.05_peak_120261	chr8	16159087	16160275
wt_h3k4me1.q.05_peak_93191	chr4	101554666	101556085
wt_h3k4me1.q.05_peak_64686	chr18	63042846	63043475
wt_h3k4me1.q.05_peak_35113	chr13	47244784	47246202
wt_h3k4me1.q.05_peak_21804	chr11	61150490	61151536
wt_h3k4me1.q.05_peak_23087	chr11	79650040	79650803
wt_h3k4me1.q.05_peak_21437	chr11	56348061	56348838
wt_h3k4me1.q.05_peak_71633	chr2	35749315	35751122
wt_h3k4me1.q.05_peak_68189	chr19	37149813	37150758
[truncated: 44,892 more rows]

## Sheet: PFC_All_Poised_Enhancer
PeakID	Chr	Start	End
wt_h3k4me1.q.05_peak_14260	chr10	66994554	66995246
wt_h3k4me1.q.05_peak_72690	chr2	58523235	58525098
wt_h3k4me1.q.05_peak_99607	chr5	54180708	54181034
wt_h3k4me1.q.05_peak_5868	chr1	118825247	118827831
wt_h3k4me1.q.05_peak_73014	chr2	62819187	62819581
wt_h3k4me1.q.05_peak_81068	chr3	26148097	26149057
wt_h3k4me1.q.05_peak_56346	chr16	94972042	94973487
wt_h3k4me1.q.05_peak_78384	chr2	151956591	151957231
wt_h3k4me1.q.05_peak_84160	chr3	86650877	86651246
wt_h3k4me1.q.05_peak_36327	chr13	68926494	68926872
wt_h3k4me1.q.05_peak_1043	chr1	25098492	25098799
wt_h3k4me1.q.05_peak_132571	chr9	108798654	108798982
wt_h3k4me1.q.05_peak_96312	chr4	151538815	151539246
wt_h3k4me1.q.05_peak_102815	chr5	117607378	117608456
wt_h3k4me1.q.05_peak_133836	chrX	13036979	13037603
wt_h3k4me1.q.05_peak_135827	chrX	152724752	152725401
wt_h3k4me1.q.05_peak_22058	chr11	65809746	65810109
wt_h3k4me1.q.05_peak_54349	chr16	46304908	46305933
wt_h3k4me1.q.05_peak_57579	chr17	26469855	26470363
wt_h3k4me1.q.05_peak_113397	chr6	148063172	148065137
wt_h3k4me1.q.05_peak_122707	chr8	68372006	68372404
wt_h3k4me1.q.05_peak_25023	chr11	108028112	108028426
wt_h3k4me1.q.05_peak_44356	chr14	103297239	103297568
wt_h3k4me1.q.05_peak_91839	chr4	75517895	75518339
wt_h3k4me1.q.05_peak_38685	chr13	109533873	109534767
wt_h3k4me1.q.05_peak_92900	chr4	97380814	97381437
wt_h3k4me1.q.05_peak_88226	chr3	156795721	156796807
wt_h3k4me1.q.05_peak_89392	chr4	23186189	23186707
wt_h3k4me1.q.05_peak_46786	chr15	34106773	34107509
wt_h3k4me1.q.05_peak_108338	chr6	65138004	65138501
wt_h3k4me1.q.05_peak_38689	chr13	109548806	109549449
wt_h3k4me1.q.05_peak_73024	chr2	62903755	62904207
wt_h3k4me1.q.05_peak_121207	chr8	35180109	35180680
wt_h3k4me1.q.05_peak_17414	chr10	113341973	113342353
wt_h3k4me1.q.05_peak_64544	chr18	61356897	61357374
wt_h3k4me1.q.05_peak_86656	chr3	130362699	130363496
wt_h3k4me1.q.05_peak_62600	chr18	32271302	32271661
wt_h3k4me1.q.05_peak_19348	chr11	21195258	21196214
wt_h3k4me1.q.05_peak_124408	chr8	96161390	96161808
wt_h3k4me1.q.05_peak_83426	chr3	75571826	75572182
wt_h3k4me1.q.05_peak_76451	chr2	122032570	122033331
wt_h3k4me1.q.05_peak_36826	chr13	79980068	79980714
wt_h3k4me1.q.05_peak_12735	chr10	36751209	36751777
wt_h3k4me1.q.05_peak_38590	chr13	108110768	108111552
wt_h3k4me1.q.05_peak_45483	chr15	6791932	6792400
wt_h3k4me1.q.05_peak_44329	chr14	103012331	103012973
wt_h3k4me1.q.05_peak_20278	chr11	35855244	35855498
wt_h3k4me1.q.05_peak_2268	chr1	46808635	46808975
wt_h3k4me1.q.05_peak_53865	chr16	38692650	38692983
wt_h3k4me1.q.05_peak_6358	chr1	128046405	128046724
wt_h3k4me1.q.05_peak_58844	chr17	51799644	51800221
wt_h3k4me1.q.05_peak_45762	chr15	12352062	12352338
wt_h3k4me1.q.05_peak_18768	chr11	7145043	7145781
wt_h3k4me1.q.05_peak_13627	chr10	54130090	54130489
wt_h3k4me1.q.05_peak_52037	chr16	10565801	10567444
wt_h3k4me1.q.05_peak_61596	chr18	13027331	13027863
wt_h3k4me1.q.05_peak_65960	chr18	80682993	80683303
wt_h3k4me1.q.05_peak_33930	chr13	29937016	29937909
wt_h3k4me1.q.05_peak_27587	chr12	31294795	31295419
wt_h3k4me1.q.05_peak_19847	chr11	30236655	30238409
wt_h3k4me1.q.05_peak_26897	chr12	16388402	16389174
wt_h3k4me1.q.05_peak_32643	chr13	5433788	5434123
wt_h3k4me1.q.05_peak_103103	chr5	121443219	121443663
wt_h3k4me1.q.05_peak_21089	chr11	50919825	50920146
wt_h3k4me1.q.05_peak_86720	chr3	131690514	131691285
wt_h3k4me1.q.05_peak_73927	chr2	76447423	76448095
wt_h3k4me1.q.05_peak_92621	chr4	88307735	88309376
wt_h3k4me1.q.05_peak_82653	chr3	56357104	56357706
wt_h3k4me1.q.05_peak_102009	chr5	106116980	106117249
wt_h3k4me1.q.05_peak_120675	chr8	24503498	24504437
wt_h3k4me1.q.05_peak_38262	chr13	103247525	103247827
wt_h3k4me1.q.05_peak_102301	chr5	111720271	111720700
wt_h3k4me1.q.05_peak_22094	chr11	66803119	66803709
wt_h3k4me1.q.05_peak_126138	chr8	125341486	125342256
wt_h3k4me1.q.05_peak_66732	chr19	8640912	8642161
wt_h3k4me1.q.05_peak_34254	chr13	36263335	36263687
wt_h3k4me1.q.05_peak_41133	chr14	33485481	33485753
wt_h3k4me1.q.05_peak_93357	chr4	103263674	103265235
wt_h3k4me1.q.05_peak_34919	chr13	45571658	45572804
wt_h3k4me1.q.05_peak_62391	chr18	26710868	26711186
wt_h3k4me1.q.05_peak_54635	chr16	55039226	55040121
wt_h3k4me1.q.05_peak_30900	chr12	93030417	93030684
wt_h3k4me1.q.05_peak_110230	chr6	99204447	99205220
wt_h3k4me1.q.05_peak_61199	chr18	5680359	5680728
wt_h3k4me1.q.05_peak_82865	chr3	60599986	60601064
wt_h3k4me1.q.05_peak_4395	chr1	82899606	82900453
wt_h3k4me1.q.05_peak_62090	chr18	23550257	23551401
wt_h3k4me1.q.05_peak_70421	chr2	18234089	18234874
wt_h3k4me1.q.05_peak_42679	chr14	65200606	65202349
wt_h3k4me1.q.05_peak_103562	chr5	126764882	126765217
wt_h3k4me1.q.05_peak_64677	chr18	62863110	62863586
wt_h3k4me1.q.05_peak_40755	chr14	28059778	28061489
wt_h3k4me1.q.05_peak_29732	chr12	75037698	75038986
wt_h3k4me1.q.05_peak_93600	chr4	106447096	106447676
wt_h3k4me1.q.05_peak_61566	chr18	12824069	12824429
wt_h3k4me1.q.05_peak_100603	chr5	75387793	75389882
wt_h3k4me1.q.05_peak_114109	chr7	34606439	34606826
wt_h3k4me1.q.05_peak_83725	chr3	80713708	80714588
wt_h3k4me1.q.05_peak_45154	chr14	121314749	121315185
wt_h3k4me1.q.05_peak_5896	chr1	119299627	119300502
wt_h3k4me1.q.05_peak_87315	chr3	141787244	141787568
wt_h3k4me1.q.05_peak_83355	chr3	71104123	71105479
wt_h3k4me1.q.05_peak_127761	chr9	31243667	31245480
wt_h3k4me1.q.05_peak_133928	chrX	16644862	16645183
wt_h3k4me1.q.05_peak_119309	chr7	143144522	143145061
wt_h3k4me1.q.05_peak_40498	chr14	24902969	24903891
wt_h3k4me1.q.05_peak_10564	chr1	192078427	192078824
wt_h3k4me1.q.05_peak_90933	chr4	54956296	54956680
wt_h3k4me1.q.05_peak_2749	chr1	55632866	55633570
wt_h3k4me1.q.05_peak_80626	chr3	15003489	15003807
wt_h3k4me1.q.05_peak_5741	chr1	112389630	112390140
wt_h3k4me1.q.05_peak_24073	chr11	95557463	95558419
wt_h3k4me1.q.05_peak_5844	chr1	118428348	118430428
wt_h3k4me1.q.05_peak_131118	chr9	83646469	83647175
wt_h3k4me1.q.05_peak_29917	chr12	77673187	77673795
wt_h3k4me1.q.05_peak_981	chr1	24364532	24365036
wt_h3k4me1.q.05_peak_134448	chrX	58977184	58977472
wt_h3k4me1.q.05_peak_44286	chr14	102064874	102065301
wt_h3k4me1.q.05_peak_4257	chr1	80293936	80294255
wt_h3k4me1.q.05_peak_83793	chr3	81215370	81216204
wt_h3k4me1.q.05_peak_94202	chr4	119560702	119560973
wt_h3k4me1.q.05_peak_23465	chr11	85227268	85227548
wt_h3k4me1.q.05_peak_34753	chr13	43461093	43461602
wt_h3k4me1.q.05_peak_38599	chr13	108191116	108191450
wt_h3k4me1.q.05_peak_71890	chr2	41498932	41499232
wt_h3k4me1.q.05_peak_90921	chr4	54652286	54653359
wt_h3k4me1.q.05_peak_52407	chr16	17359195	17359788
wt_h3k4me1.q.05_peak_116954	chr7	98499831	98500156
wt_h3k4me1.q.05_peak_29268	chr12	69290200	69290903
wt_h3k4me1.q.05_peak_6162	chr1	125724031	125725139
wt_h3k4me1.q.05_peak_114712	chr7	49553123	49554021
wt_h3k4me1.q.05_peak_69245	chr19	57061793	57062780
wt_h3k4me1.q.05_peak_73226	chr2	65948701	65949016
wt_h3k4me1.q.05_peak_45830	chr15	12841832	12842432
wt_h3k4me1.q.05_peak_40784	chr14	28355446	28356430
wt_h3k4me1.q.05_peak_60252	chr17	80460790	80461129
wt_h3k4me1.q.05_peak_18338	chr10	128393887	128395560
wt_h3k4me1.q.05_peak_115318	chr7	65572375	65573287
wt_h3k4me1.q.05_peak_20628	chr11	42857458	42858338
wt_h3k4me1.q.05_peak_62147	chr18	24086767	24087662
wt_h3k4me1.q.05_peak_85289	chr3	105563935	105564455
wt_h3k4me1.q.05_peak_41425	chr14	38914136	38914782
wt_h3k4me1.q.05_peak_97100	chr5	13501071	13501362
wt_h3k4me1.q.05_peak_31776	chr12	107831827	107832742
wt_h3k4me1.q.05_peak_33172	chr13	14373290	14375037
wt_h3k4me1.q.05_peak_42504	chr14	63654010	63654279
wt_h3k4me1.q.05_peak_31724	chr12	106322579	106322931
wt_h3k4me1.q.05_peak_27985	chr12	37463315	37463821
wt_h3k4me1.q.05_peak_28796	chr12	53971151	53972141
wt_h3k4me1.q.05_peak_107254	chr6	42698761	42699054
wt_h3k4me1.q.05_peak_62863	chr18	35575072	35575481
wt_h3k4me1.q.05_peak_134223	chrX	42342977	42343881
wt_h3k4me1.q.05_peak_97063	chr5	12243387	12243716
wt_h3k4me1.q.05_peak_24137	chr11	96995008	96995386
wt_h3k4me1.q.05_peak_61016	chr17	90990131	90991115
wt_h3k4me1.q.05_peak_51764	chr16	7021688	7022068
wt_h3k4me1.q.05_peak_60	chr1	4139172	4139510
wt_h3k4me1.q.05_peak_127781	chr9	31730791	31731074
wt_h3k4me1.q.05_peak_124322	chr8	95084230	95085181
wt_h3k4me1.q.05_peak_50223	chr15	86005767	86006098
wt_h3k4me1.q.05_peak_90915	chr4	54524389	54524894
wt_h3k4me1.q.05_peak_36976	chr13	83394302	83394664
wt_h3k4me1.q.05_peak_100589	chr5	75028021	75028603
wt_h3k4me1.q.05_peak_109416	chr6	88140073	88140528
wt_h3k4me1.q.05_peak_118404	chr7	125556220	125557047
wt_h3k4me1.q.05_peak_78407	chr2	152240470	152241216
wt_h3k4me1.q.05_peak_26233	chr12	4118544	4119032
wt_h3k4me1.q.05_peak_24183	chr11	97458055	97458432
wt_h3k4me1.q.05_peak_43813	chr14	84908388	84908905
wt_h3k4me1.q.05_peak_121295	chr8	36175694	36176601
wt_h3k4me1.q.05_peak_120287	chr8	16422844	16423320
wt_h3k4me1.q.05_peak_80148	chr2	180202494	180203131
wt_h3k4me1.q.05_peak_61306	chr18	7889875	7890642
wt_h3k4me1.q.05_peak_39107	chr13	115087217	115087877
wt_h3k4me1.q.05_peak_66967	chr19	14956275	14956747
wt_h3k4me1.q.05_peak_118138	chr7	121475309	121475672
wt_h3k4me1.q.05_peak_19066	chr11	16352001	16352419
wt_h3k4me1.q.05_peak_13674	chr10	56197576	56198649
wt_h3k4me1.q.05_peak_10953	chr10	4664451	4665912
wt_h3k4me1.q.05_peak_68838	chr19	48025385	48025761
wt_h3k4me1.q.05_peak_418	chr1	13329591	13329877
wt_h3k4me1.q.05_peak_79553	chr2	167488654	167489152
wt_h3k4me1.q.05_peak_37191	chr13	89921437	89922377
wt_h3k4me1.q.05_peak_68787	chr19	47260126	47261902
wt_h3k4me1.q.05_peak_73620	chr2	71634565	71635167
wt_h3k4me1.q.05_peak_103465	chr5	125515139	125515482
wt_h3k4me1.q.05_peak_19662	chr11	26482107	26482360
wt_h3k4me1.q.05_peak_134202	chrX	41578556	41578864
wt_h3k4me1.q.05_peak_100933	chr5	84215306	84216434
wt_h3k4me1.q.05_peak_92761	chr4	94144867	94145578
wt_h3k4me1.q.05_peak_133225	chr9	119559312	119562582
wt_h3k4me1.q.05_peak_41181	chr14	34484860	34485566
wt_h3k4me1.q.05_peak_109976	chr6	94597335	94597681
wt_h3k4me1.q.05_peak_111450	chr6	115390424	115390829
wt_h3k4me1.q.05_peak_121056	chr8	32924436	32924752
wt_h3k4me1.q.05_peak_29592	chr12	72794231	72795193
wt_h3k4me1.q.05_peak_20577	chr11	42412521	42413060
wt_h3k4me1.q.05_peak_106737	chr6	35705602	35706397
wt_h3k4me1.q.05_peak_67434	chr19	23885369	23886450
wt_h3k4me1.q.05_peak_110087	chr6	96588514	96588795
wt_h3k4me1.q.05_peak_82836	chr3	60469627	60470274
wt_h3k4me1.q.05_peak_69558	chr2	3917558	3919079
wt_h3k4me1.q.05_peak_5039	chr1	91759825	91760790
wt_h3k4me1.q.05_peak_69395	chr19	58788962	58789641
wt_h3k4me1.q.05_peak_52339	chr16	16554092	16554890
wt_h3k4me1.q.05_peak_13479	chr10	52718096	52718479
wt_h3k4me1.q.05_peak_5941	chr1	120038538	120038800
wt_h3k4me1.q.05_peak_27354	chr12	28808008	28808339
wt_h3k4me1.q.05_peak_28158	chr12	40665598	40665991
wt_h3k4me1.q.05_peak_99629	chr5	54752919	54753241
wt_h3k4me1.q.05_peak_63786	chr18	47348753	47349166
wt_h3k4me1.q.05_peak_67962	chr19	32665211	32666043
wt_h3k4me1.q.05_peak_98706	chr5	38070097	38070412
wt_h3k4me1.q.05_peak_5526	chr1	105178365	105178639
wt_h3k4me1.q.05_peak_51348	chr15	101995998	101996681
wt_h3k4me1.q.05_peak_85286	chr3	105547717	105547972
wt_h3k4me1.q.05_peak_44855	chr14	118607707	118608230
wt_h3k4me1.q.05_peak_28250	chr12	43463435	43464161
wt_h3k4me1.q.05_peak_87401	chr3	143121323	143122286
wt_h3k4me1.q.05_peak_108415	chr6	66982067	66982468
wt_h3k4me1.q.05_peak_15395	chr10	82814036	82814472
wt_h3k4me1.q.05_peak_50117	chr15	84811325	84811616
wt_h3k4me1.q.05_peak_118996	chr7	137478534	137479147
wt_h3k4me1.q.05_peak_87603	chr3	145742887	145743353
wt_h3k4me1.q.05_peak_5417	chr1	99879903	99880474
wt_h3k4me1.q.05_peak_64402	chr18	59964325	59964658
wt_h3k4me1.q.05_peak_77336	chr2	135737485	135737901
wt_h3k4me1.q.05_peak_88797	chr4	9434127	9434862
wt_h3k4me1.q.05_peak_106191	chr6	28984801	28985103
wt_h3k4me1.q.05_peak_105486	chr6	13379843	13380150
wt_h3k4me1.q.05_peak_95094	chr4	131805109	131805996
wt_h3k4me1.q.05_peak_17386	chr10	112373186	112373846
wt_h3k4me1.q.05_peak_133975	chrX	18400253	18400593
wt_h3k4me1.q.05_peak_72631	chr2	57407456	57407928
wt_h3k4me1.q.05_peak_126411	chr8	128727427	128727767
wt_h3k4me1.q.05_peak_132790	chr9	112167352	112168380
wt_h3k4me1.q.05_peak_919	chr1	23410289	23410729
wt_h3k4me1.q.05_peak_76342	chr2	120542623	120543453
wt_h3k4me1.q.05_peak_91170	chr4	58320724	58321161
wt_h3k4me1.q.05_peak_134549	chrX	69030216	69030476
wt_h3k4me1.q.05_peak_77876	chr2	143558231	143558573
wt_h3k4me1.q.05_peak_28522	chr12	50478856	50479861
wt_h3k4me1.q.05_peak_3159	chr1	61320467	61322563
wt_h3k4me1.q.05_peak_90722	chr4	49575421	49576400
wt_h3k4me1.q.05_peak_85614	chr3	109176709	109177759
wt_h3k4me1.q.05_peak_44080	chr14	97866340	97866686
wt_h3k4me1.q.05_peak_114668	chr7	49346257	49348263
wt_h3k4me1.q.05_peak_103055	chr5	121082472	121083752
wt_h3k4me1.q.05_peak_77064	chr2	131857700	131858309
wt_h3k4me1.q.05_peak_41683	chr14	47403185	47403485
wt_h3k4me1.q.05_peak_92204	chr4	82582863	82583577
wt_h3k4me1.q.05_peak_66034	chr18	82301836	82302112
wt_h3k4me1.q.05_peak_65868	chr18	79016493	79017382
wt_h3k4me1.q.05_peak_10254	chr1	186347425	186347853
wt_h3k4me1.q.05_peak_23514	chr11	86416732	86417533
wt_h3k4me1.q.05_peak_130846	chr9	77584513	77585214
wt_h3k4me1.q.05_peak_91936	chr4	77038757	77039341
wt_h3k4me1.q.05_peak_65860	chr18	78992013	78993196
wt_h3k4me1.q.05_peak_84165	chr3	86785321	86785876
wt_h3k4me1.q.05_peak_52050	chr16	10794113	10794555
wt_h3k4me1.q.05_peak_14559	chr10	70148119	70148646
wt_h3k4me1.q.05_peak_77397	chr2	136149783	136150394
wt_h3k4me1.q.05_peak_33050	chr13	12038545	12039004
wt_h3k4me1.q.05_peak_101173	chr5	90354962	90357059
wt_h3k4me1.q.05_peak_18836	chr11	8716536	8717103
wt_h3k4me1.q.05_peak_106054	chr6	27904307	27904857
wt_h3k4me1.q.05_peak_105508	chr6	13664766	13665151
wt_h3k4me1.q.05_peak_122444	chr8	64534523	64534855
wt_h3k4me1.q.05_peak_33367	chr13	18824333	18825591
wt_h3k4me1.q.05_peak_31949	chr12	109554231	109554760
wt_h3k4me1.q.05_peak_39428	chr14	9555822	9556688
wt_h3k4me1.q.05_peak_10455	chr1	190570712	190571293
wt_h3k4me1.q.05_peak_93950	chr4	114437760	114438293
wt_h3k4me1.q.05_peak_12046	chr10	21949666	21949962
wt_h3k4me1.q.05_peak_12426	chr10	28281063	28281899
wt_h3k4me1.q.05_peak_26912	chr12	16605383	16605793
wt_h3k4me1.q.05_peak_20732	chr11	44348916	44349234
wt_h3k4me1.q.05_peak_129549	chr9	57568248	57568668
wt_h3k4me1.q.05_peak_39907	chr14	17786848	17787243
wt_h3k4me1.q.05_peak_28218	chr12	41509969	41511354
wt_h3k4me1.q.05_peak_78018	chr2	145158821	145159464
wt_h3k4me1.q.05_peak_123614	chr8	84423847	84425161
wt_h3k4me1.q.05_peak_16158	chr10	94294915	94295751
wt_h3k4me1.q.05_peak_109015	chr6	82956771	82957285
wt_h3k4me1.q.05_peak_70158	chr2	12523363	12524279
wt_h3k4me1.q.05_peak_24587	chr11	102787624	102788502
wt_h3k4me1.q.05_peak_27736	chr12	33129132	33129786
wt_h3k4me1.q.05_peak_68104	chr19	36227233	36228267
wt_h3k4me1.q.05_peak_12516	chr10	30003241	30003794
wt_h3k4me1.q.05_peak_87386	chr3	142855594	142857220
wt_h3k4me1.q.05_peak_112464	chr6	135162614	135163387
wt_h3k4me1.q.05_peak_89842	chr4	33941540	33941841
wt_h3k4me1.q.05_peak_95765	chr4	140620645	140621436
wt_h3k4me1.q.05_peak_80009	chr2	178591000	178591553
wt_h3k4me1.q.05_peak_81278	chr3	29106145	29106581
wt_h3k4me1.q.05_peak_92842	chr4	95751918	95753154
wt_h3k4me1.q.05_peak_7044	chr1	136115886	136116314
wt_h3k4me1.q.05_peak_20023	chr11	32462958	32464122
wt_h3k4me1.q.05_peak_93587	chr4	106257278	106258348
wt_h3k4me1.q.05_peak_121560	chr8	41457644	41458002
wt_h3k4me1.q.05_peak_108354	chr6	65565277	65565949
wt_h3k4me1.q.05_peak_74629	chr2	91779415	91779716
wt_h3k4me1.q.05_peak_86016	chr3	119492441	119493311
wt_h3k4me1.q.05_peak_69503	chr19	60962793	60963084
wt_h3k4me1.q.05_peak_54970	chr16	65064964	65065420
wt_h3k4me1.q.05_peak_62684	chr18	33352142	33353150
wt_h3k4me1.q.05_peak_14107	chr10	63256246	63256519
wt_h3k4me1.q.05_peak_98609	chr5	36720639	36721398
wt_h3k4me1.q.05_peak_118072	chr7	120686516	120687338
wt_h3k4me1.q.05_peak_3645	chr1	70795342	70795804
wt_h3k4me1.q.05_peak_34001	chr13	31248795	31250272
wt_h3k4me1.q.05_peak_120403	chr8	17368856	17369699
wt_h3k4me1.q.05_peak_114146	chr7	35091195	35092411
wt_h3k4me1.q.05_peak_23332	chr11	82692056	82692782
wt_h3k4me1.q.05_peak_122601	chr8	66781815	66782127
wt_h3k4me1.q.05_peak_26795	chr12	13835285	13835660
wt_h3k4me1.q.05_peak_33644	chr13	23940155	23941029
wt_h3k4me1.q.05_peak_17166	chr10	110102133	110102573
wt_h3k4me1.q.05_peak_39681	chr14	12800918	12802148
wt_h3k4me1.q.05_peak_96450	chr4	152603981	152604451
wt_h3k4me1.q.05_peak_127407	chr9	27837989	27838880
wt_h3k4me1.q.05_peak_103483	chr5	125590588	125591099
wt_h3k4me1.q.05_peak_71225	chr2	30850982	30851383
wt_h3k4me1.q.05_peak_991	chr1	24532423	24532802
wt_h3k4me1.q.05_peak_10411	chr1	189525296	189526262
wt_h3k4me1.q.05_peak_126445	chr9	4432808	4433680
wt_h3k4me1.q.05_peak_4137	chr1	78378301	78379132
wt_h3k4me1.q.05_peak_20421	chr11	37434583	37435736
wt_h3k4me1.q.05_peak_108255	chr6	62799246	62800567
wt_h3k4me1.q.05_peak_50855	chr15	95320004	95320461
wt_h3k4me1.q.05_peak_87708	chr3	146914640	146914968
wt_h3k4me1.q.05_peak_55643	chr16	81352684	81353293
wt_h3k4me1.q.05_peak_60882	chr17	89871005	89871554
wt_h3k4me1.q.05_peak_10419	chr1	189619072	189619619
wt_h3k4me1.q.05_peak_38348	chr13	104562771	104563305
wt_h3k4me1.q.05_peak_92246	chr4	83167078	83167664
wt_h3k4me1.q.05_peak_105200	chr6	5972880	5973594
wt_h3k4me1.q.05_peak_24697	chr11	104025184	104026075
wt_h3k4me1.q.05_peak_79885	chr2	173366794	173367114
wt_h3k4me1.q.05_peak_97239	chr5	16231133	16232010
wt_h3k4me1.q.05_peak_52852	chr16	24644576	24645547
wt_h3k4me1.q.05_peak_13892	chr10	59859172	59859916
wt_h3k4me1.q.05_peak_67935	chr19	32320851	32322848
wt_h3k4me1.q.05_peak_121843	chr8	47228616	47229477
wt_h3k4me1.q.05_peak_37393	chr13	92758602	92759499
wt_h3k4me1.q.05_peak_108733	chr6	76620617	76621223
wt_h3k4me1.q.05_peak_44259	chr14	101721169	101721714
wt_h3k4me1.q.05_peak_133133	chr9	118108320	118109441
wt_h3k4me1.q.05_peak_69355	chr19	58068352	58068925
wt_h3k4me1.q.05_peak_67161	chr19	19009619	19010301
wt_h3k4me1.q.05_peak_27259	chr12	26963711	26964267
wt_h3k4me1.q.05_peak_14527	chr10	69926499	69926842
wt_h3k4me1.q.05_peak_72772	chr2	59384217	59384883
wt_h3k4me1.q.05_peak_5569	chr1	105974852	105975800
wt_h3k4me1.q.05_peak_41810	chr14	49448461	49448799
wt_h3k4me1.q.05_peak_124728	chr8	105186910	105187272
wt_h3k4me1.q.05_peak_36552	chr13	73509187	73509821
wt_h3k4me1.q.05_peak_64926	chr18	65865684	65866840
wt_h3k4me1.q.05_peak_89361	chr4	22187647	22188618
wt_h3k4me1.q.05_peak_79099	chr2	162567669	162571954
wt_h3k4me1.q.05_peak_110821	chr6	108222423	108223016
wt_h3k4me1.q.05_peak_83937	chr3	83987428	83989223
wt_h3k4me1.q.05_peak_78399	chr2	152138046	152138447
wt_h3k4me1.q.05_peak_4903	chr1	89860299	89860755
wt_h3k4me1.q.05_peak_42960	chr14	69973629	69973907
wt_h3k4me1.q.05_peak_67861	chr19	31147399	31148196
wt_h3k4me1.q.05_peak_104400	chr5	140442883	140443256
wt_h3k4me1.q.05_peak_117175	chr7	100860518	100860771
wt_h3k4me1.q.05_peak_27148	chr12	25376110	25377035
wt_h3k4me1.q.05_peak_118448	chr7	126057292	126057623
wt_h3k4me1.q.05_peak_131999	chr9	101867748	101868423
wt_h3k4me1.q.05_peak_63248	chr18	40142237	40142955
wt_h3k4me1.q.05_peak_107473	chr6	48876108	48876472
wt_h3k4me1.q.05_peak_99409	chr5	52020949	52022520
wt_h3k4me1.q.05_peak_13328	chr10	45784785	45785313
wt_h3k4me1.q.05_peak_87081	chr3	138058129	138058465
wt_h3k4me1.q.05_peak_16550	chr10	99610335	99610851
wt_h3k4me1.q.05_peak_60848	chr17	88816216	88816556
wt_h3k4me1.q.05_peak_62331	chr18	25717230	25717865
wt_h3k4me1.q.05_peak_124178	chr8	93653866	93655019
wt_h3k4me1.q.05_peak_71843	chr2	39130924	39131198
wt_h3k4me1.q.05_peak_127192	chr9	25120240	25121122
wt_h3k4me1.q.05_peak_30249	chr12	82355060	82356559
wt_h3k4me1.q.05_peak_98867	chr5	41602139	41602655
wt_h3k4me1.q.05_peak_23888	chr11	93324768	93325747
wt_h3k4me1.q.05_peak_125025	chr8	110197447	110197758
wt_h3k4me1.q.05_peak_134867	chrX	85323580	85324158
wt_h3k4me1.q.05_peak_118791	chr7	132672404	132673169
wt_h3k4me1.q.05_peak_13532	chr10	53160806	53161254
wt_h3k4me1.q.05_peak_86742	chr3	132462896	132463172
wt_h3k4me1.q.05_peak_48228	chr15	59780570	59781164
wt_h3k4me1.q.05_peak_6605	chr1	132046134	132047173
wt_h3k4me1.q.05_peak_56815	chr17	6433814	6434089
wt_h3k4me1.q.05_peak_37880	chr13	98310204	98310968
wt_h3k4me1.q.05_peak_33850	chr13	28875669	28876074
wt_h3k4me1.q.05_peak_125600	chr8	119785711	119786542
wt_h3k4me1.q.05_peak_107703	chr6	52861442	52862133
wt_h3k4me1.q.05_peak_69850	chr2	6764371	6765246
wt_h3k4me1.q.05_peak_85067	chr3	102715294	102715590
wt_h3k4me1.q.05_peak_15093	chr10	77927359	77927982
wt_h3k4me1.q.05_peak_76879	chr2	129880997	129881734
wt_h3k4me1.q.05_peak_54583	chr16	52336640	52336998
wt_h3k4me1.q.05_peak_85129	chr3	103639630	103640046
wt_h3k4me1.q.05_peak_6030	chr1	122062379	122062869
wt_h3k4me1.q.05_peak_5859	chr1	118589160	118590100
wt_h3k4me1.q.05_peak_29599	chr12	73162637	73163069
wt_h3k4me1.q.05_peak_44092	chr14	98514352	98514633
wt_h3k4me1.q.05_peak_135579	chrX	139774713	139775076
wt_h3k4me1.q.05_peak_54882	chr16	62499263	62499658
wt_h3k4me1.q.05_peak_125484	chr8	117951425	117951969
wt_h3k4me1.q.05_peak_36051	chr13	59646515	59647091
wt_h3k4me1.q.05_peak_1740	chr1	38237696	38238890
wt_h3k4me1.q.05_peak_494	chr1	14997725	14998679
wt_h3k4me1.q.05_peak_100288	chr5	71593858	71594183
wt_h3k4me1.q.05_peak_72805	chr2	59765386	59765679
wt_h3k4me1.q.05_peak_51509	chr16	4325044	4325414
wt_h3k4me1.q.05_peak_114251	chr7	37661181	37661733
wt_h3k4me1.q.05_peak_55175	chr16	70724597	70725742
wt_h3k4me1.q.05_peak_51794	chr16	7149300	7149800
wt_h3k4me1.q.05_peak_50118	chr15	84812535	84813728
wt_h3k4me1.q.05_peak_3565	chr1	67049356	67049986
wt_h3k4me1.q.05_peak_82268	chr3	51883152	51883660
wt_h3k4me1.q.05_peak_52446	chr16	17718179	17718437
wt_h3k4me1.q.05_peak_70357	chr2	17215599	17215973
wt_h3k4me1.q.05_peak_117158	chr7	100767150	100768210
wt_h3k4me1.q.05_peak_80352	chr3	8251484	8251827
wt_h3k4me1.q.05_peak_42674	chr14	65111312	65112007
wt_h3k4me1.q.05_peak_91607	chr4	68838156	68839012
wt_h3k4me1.q.05_peak_1922	chr1	39905755	39906282
wt_h3k4me1.q.05_peak_33674	chr13	24231246	24234016
wt_h3k4me1.q.05_peak_103463	chr5	125499406	125500056
wt_h3k4me1.q.05_peak_74516	chr2	90632099	90633284
wt_h3k4me1.q.05_peak_46015	chr15	19686832	19687944
wt_h3k4me1.q.05_peak_60721	chr17	86970984	86971988
wt_h3k4me1.q.05_peak_45731	chr15	12130272	12130715
wt_h3k4me1.q.05_peak_55839	chr16	87250842	87251131
wt_h3k4me1.q.05_peak_9479	chr1	175292900	175293233
wt_h3k4me1.q.05_peak_98905	chr5	42268755	42269193
wt_h3k4me1.q.05_peak_106919	chr6	38203343	38203628
wt_h3k4me1.q.05_peak_118609	chr7	129291444	129291899
wt_h3k4me1.q.05_peak_89554	chr4	28001686	28002609
wt_h3k4me1.q.05_peak_85609	chr3	109104634	109104964
wt_h3k4me1.q.05_peak_67593	chr19	26733600	26734002
wt_h3k4me1.q.05_peak_28596	chr12	51379865	51380289
wt_h3k4me1.q.05_peak_17464	chr10	115069446	115070226
wt_h3k4me1.q.05_peak_131494	chr9	94182328	94182595
wt_h3k4me1.q.05_peak_85601	chr3	108975032	108975759
wt_h3k4me1.q.05_peak_124929	chr8	108239715	108240333
wt_h3k4me1.q.05_peak_104865	chr5	148160208	148160672
wt_h3k4me1.q.05_peak_83945	chr3	84077576	84077995
wt_h3k4me1.q.05_peak_96762	chr5	4434361	4434677
wt_h3k4me1.q.05_peak_79112	chr2	162697431	162698148
wt_h3k4me1.q.05_peak_66042	chr18	82480383	82481306
wt_h3k4me1.q.05_peak_62446	chr18	28874585	28875422
wt_h3k4me1.q.05_peak_37841	chr13	97895987	97896632
wt_h3k4me1.q.05_peak_106117	chr6	28576784	28577398
wt_h3k4me1.q.05_peak_27298	chr12	27838251	27839265
wt_h3k4me1.q.05_peak_88146	chr3	155322649	155323703
wt_h3k4me1.q.05_peak_102328	chr5	112080702	112081387
wt_h3k4me1.q.05_peak_130188	chr9	66307839	66308185
wt_h3k4me1.q.05_peak_78286	chr2	149932992	149934421
wt_h3k4me1.q.05_peak_26958	chr12	17025819	17026539
wt_h3k4me1.q.05_peak_41439	chr14	39078879	39079167
wt_h3k4me1.q.05_peak_105845	chr6	21600785	21601875
wt_h3k4me1.q.05_peak_45528	chr15	7895530	7896012
wt_h3k4me1.q.05_peak_84804	chr3	98095855	98096190
wt_h3k4me1.q.05_peak_61033	chr17	91069944	91070376
wt_h3k4me1.q.05_peak_43592	chr14	78491345	78492637
wt_h3k4me1.q.05_peak_43586	chr14	78291408	78292303
wt_h3k4me1.q.05_peak_42815	chr14	66871881	66872249
wt_h3k4me1.q.05_peak_30845	chr12	91604708	91605052
wt_h3k4me1.q.05_peak_68836	chr19	48002100	48002572
wt_h3k4me1.q.05_peak_76160	chr2	117904668	117905635
wt_h3k4me1.q.05_peak_114342	chr7	43309284	43309953
wt_h3k4me1.q.05_peak_105434	chr6	12058890	12059183
wt_h3k4me1.q.05_peak_70256	chr2	14543295	14543859
wt_h3k4me1.q.05_peak_33006	chr13	11801430	11802223
wt_h3k4me1.q.05_peak_131933	chr9	100622674	100623038
wt_h3k4me1.q.05_peak_48718	chr15	67571323	67572386
wt_h3k4me1.q.05_peak_64781	chr18	64829240	64829809
wt_h3k4me1.q.05_peak_80531	chr3	10425064	10425547
wt_h3k4me1.q.05_peak_39782	chr14	14903030	14903947
wt_h3k4me1.q.05_peak_96766	chr5	4530286	4530974
wt_h3k4me1.q.05_peak_70297	chr2	15059063	15059622
wt_h3k4me1.q.05_peak_17586	chr10	116756105	116756574
wt_h3k4me1.q.05_peak_43538	chr14	77622965	77623244
wt_h3k4me1.q.05_peak_88950	chr4	12534413	12534937
wt_h3k4me1.q.05_peak_21320	chr11	54330768	54331325
wt_h3k4me1.q.05_peak_62541	chr18	31093581	31093875
wt_h3k4me1.q.05_peak_9174	chr1	170492501	170493354
wt_h3k4me1.q.05_peak_103964	chr5	132437716	132437983
wt_h3k4me1.q.05_peak_44462	chr14	105287015	105287854
wt_h3k4me1.q.05_peak_17794	chr10	119803979	119805604
wt_h3k4me1.q.05_peak_105992	chr6	25137876	25138315
wt_h3k4me1.q.05_peak_24921	chr11	106669657	106670188
wt_h3k4me1.q.05_peak_134296	chrX	48348516	48349131
wt_h3k4me1.q.05_peak_75339	chr2	104035159	104036289
wt_h3k4me1.q.05_peak_107591	chr6	50685212	50685811
wt_h3k4me1.q.05_peak_59607	chr17	68971907	68972317
wt_h3k4me1.q.05_peak_40391	chr14	23855109	23856230
wt_h3k4me1.q.05_peak_19604	chr11	25573709	25574241
wt_h3k4me1.q.05_peak_25396	chr11	113519458	113521193
wt_h3k4me1.q.05_peak_81125	chr3	27481465	27482071
wt_h3k4me1.q.05_peak_120928	chr8	30732491	30733784
wt_h3k4me1.q.05_peak_124785	chr8	105799214	105799733
wt_h3k4me1.q.05_peak_17926	chr10	121886616	121887442
wt_h3k4me1.q.05_peak_20583	chr11	42438444	42439301
wt_h3k4me1.q.05_peak_61222	chr18	6161846	6162559
wt_h3k4me1.q.05_peak_65172	chr18	69064564	69065182
wt_h3k4me1.q.05_peak_50892	chr15	95794900	95795364
wt_h3k4me1.q.05_peak_62048	chr18	23200912	23201659
wt_h3k4me1.q.05_peak_36254	chr13	66928887	66929444
wt_h3k4me1.q.05_peak_33806	chr13	26656953	26658672
wt_h3k4me1.q.05_peak_1019	chr1	24742415	24742771
wt_h3k4me1.q.05_peak_96977	chr5	9169606	9170131
wt_h3k4me1.q.05_peak_20036	chr11	32512155	32512554
wt_h3k4me1.q.05_peak_98055	chr5	28520851	28521842
wt_h3k4me1.q.05_peak_84361	chr3	89238981	89239670
wt_h3k4me1.q.05_peak_75424	chr2	104488103	104488611
wt_h3k4me1.q.05_peak_18518	chr11	4613723	4614108
wt_h3k4me1.q.05_peak_68807	chr19	47499085	47500248
wt_h3k4me1.q.05_peak_54264	chr16	44703272	44703848
wt_h3k4me1.q.05_peak_76597	chr2	124684447	124684998
wt_h3k4me1.q.05_peak_36627	chr13	75338576	75338997
wt_h3k4me1.q.05_peak_125366	chr8	116373161	116373490
wt_h3k4me1.q.05_peak_68834	chr19	47939092	47940152
wt_h3k4me1.q.05_peak_127493	chr9	28493940	28494732
wt_h3k4me1.q.05_peak_133450	chr9	121890581	121891306
wt_h3k4me1.q.05_peak_36869	chr13	81491543	81492583
wt_h3k4me1.q.05_peak_18859	chr11	9317541	9318034
wt_h3k4me1.q.05_peak_93040	chr4	99110639	99110944
wt_h3k4me1.q.05_peak_51228	chr15	100478349	100479197
wt_h3k4me1.q.05_peak_50089	chr15	84432128	84432775
wt_h3k4me1.q.05_peak_75755	chr2	112312620	112313078
wt_h3k4me1.q.05_peak_99846	chr5	63739780	63740905
wt_h3k4me1.q.05_peak_128359	chr9	41989805	41991093
wt_h3k4me1.q.05_peak_113387	chr6	147506141	147507387
wt_h3k4me1.q.05_peak_99185	chr5	46291423	46292506
wt_h3k4me1.q.05_peak_113782	chr7	24442072	24442539
wt_h3k4me1.q.05_peak_74726	chr2	92651315	92651653
wt_h3k4me1.q.05_peak_45684	chr15	11713040	11713600
wt_h3k4me1.q.05_peak_5994	chr1	121394879	121395449
wt_h3k4me1.q.05_peak_108400	chr6	66927367	66927980
wt_h3k4me1.q.05_peak_99731	chr5	58706373	58706929
wt_h3k4me1.q.05_peak_4061	chr1	77370957	77371290
wt_h3k4me1.q.05_peak_31614	chr12	105013297	105013657
wt_h3k4me1.q.05_peak_29602	chr12	73201562	73201988
wt_h3k4me1.q.05_peak_70651	chr2	21530757	21531525
wt_h3k4me1.q.05_peak_23780	chr11	90324903	90325217
wt_h3k4me1.q.05_peak_101338	chr5	93109116	93109713
wt_h3k4me1.q.05_peak_86652	chr3	130330675	130331118
wt_h3k4me1.q.05_peak_103903	chr5	131796683	131797185
wt_h3k4me1.q.05_peak_64411	chr18	60142465	60143657
wt_h3k4me1.q.05_peak_112101	chr6	126340189	126340762
wt_h3k4me1.q.05_peak_125369	chr8	116435456	116435958
wt_h3k4me1.q.05_peak_80450	chr3	9469232	9470433
wt_h3k4me1.q.05_peak_108290	chr6	63832791	63833314
wt_h3k4me1.q.05_peak_9680	chr1	177461930	177462499
wt_h3k4me1.q.05_peak_58493	chr17	46807680	46807974
wt_h3k4me1.q.05_peak_54523	chr16	50752076	50752682
wt_h3k4me1.q.05_peak_67741	chr19	28844041	28844547
wt_h3k4me1.q.05_peak_116051	chr7	80500835	80501328
wt_h3k4me1.q.05_peak_59120	chr17	61606853	61607502
wt_h3k4me1.q.05_peak_118999	chr7	137617075	137617465
wt_h3k4me1.q.05_peak_10393	chr1	189282461	189282759
wt_h3k4me1.q.05_peak_133151	chr9	118544897	118545309
wt_h3k4me1.q.05_peak_1967	chr1	40270371	40271096
wt_h3k4me1.q.05_peak_47301	chr15	41430085	41430960
wt_h3k4me1.q.05_peak_79854	chr2	173087446	173088221
wt_h3k4me1.q.05_peak_60742	chr17	87168964	87170991
wt_h3k4me1.q.05_peak_119052	chr7	138866167	138866625
wt_h3k4me1.q.05_peak_96315	chr4	151576274	151577561
wt_h3k4me1.q.05_peak_6020	chr1	121783151	121783463
wt_h3k4me1.q.05_peak_97235	chr5	16222103	16222502
wt_h3k4me1.q.05_peak_102561	chr5	114074304	114075165
wt_h3k4me1.q.05_peak_38023	chr13	99724060	99724492
wt_h3k4me1.q.05_peak_40561	chr14	25547388	25547862
wt_h3k4me1.q.05_peak_94179	chr4	119155113	119155445
wt_h3k4me1.q.05_peak_48928	chr15	71161770	71162677
wt_h3k4me1.q.05_peak_59645	chr17	69685574	69686821
wt_h3k4me1.q.05_peak_79979	chr2	178274051	178274483
wt_h3k4me1.q.05_peak_56286	chr16	94621630	94622769
wt_h3k4me1.q.05_peak_45919	chr15	16759428	16760569
wt_h3k4me1.q.05_peak_135016	chrX	95922729	95923183
wt_h3k4me1.q.05_peak_75599	chr2	108038459	108038811
wt_h3k4me1.q.05_peak_86280	chr3	123669248	123670736
wt_h3k4me1.q.05_peak_64626	chr18	62142800	62143386
wt_h3k4me1.q.05_peak_33947	chr13	30269823	30270254
wt_h3k4me1.q.05_peak_86970	chr3	136809432	136810278
wt_h3k4me1.q.05_peak_33263	chr13	16591980	16592752
wt_h3k4me1.q.05_peak_43114	chr14	72214370	72214705
wt_h3k4me1.q.05_peak_43963	chr14	93074485	93075202
wt_h3k4me1.q.05_peak_99427	chr5	52141879	52142440
wt_h3k4me1.q.05_peak_48364	chr15	63527081	63527544
wt_h3k4me1.q.05_peak_8071	chr1	156470372	156471163
wt_h3k4me1.q.05_peak_17584	chr10	116716921	116717604
wt_h3k4me1.q.05_peak_75314	chr2	103642297	103643507
wt_h3k4me1.q.05_peak_6249	chr1	127209644	127210085
wt_h3k4me1.q.05_peak_76991	chr2	131271431	131271775
wt_h3k4me1.q.05_peak_97679	chr5	23226573	23227205
wt_h3k4me1.q.05_peak_11433	chr10	12522108	12522397
wt_h3k4me1.q.05_peak_67270	chr19	21690296	21690963
wt_h3k4me1.q.05_peak_119597	chr8	8574957	8575494
wt_h3k4me1.q.05_peak_28982	chr12	58969449	58970147
wt_h3k4me1.q.05_peak_28190	chr12	41053799	41054462
wt_h3k4me1.q.05_peak_90549	chr4	47185660	47186015
wt_h3k4me1.q.05_peak_105417	chr6	11726946	11727914
wt_h3k4me1.q.05_peak_52488	chr16	18191503	18192196
wt_h3k4me1.q.05_peak_98911	chr5	42392920	42393332
wt_h3k4me1.q.05_peak_62435	chr18	28164729	28165247
wt_h3k4me1.q.05_peak_90572	chr4	47404294	47404556
wt_h3k4me1.q.05_peak_88051	chr3	153657521	153658506
wt_h3k4me1.q.05_peak_80712	chr3	18218827	18219806
wt_h3k4me1.q.05_peak_125540	chr8	118718058	118718930
wt_h3k4me1.q.05_peak_73446	chr2	69054422	69055001
wt_h3k4me1.q.05_peak_120969	chr8	31843233	31844083
wt_h3k4me1.q.05_peak_13717	chr10	57685844	57686444
wt_h3k4me1.q.05_peak_47344	chr15	41650695	41651918
wt_h3k4me1.q.05_peak_75528	chr2	106750068	106750360
wt_h3k4me1.q.05_peak_131414	chr9	91205914	91206350
wt_h3k4me1.q.05_peak_57695	chr17	27725708	27726400
wt_h3k4me1.q.05_peak_103054	chr5	121069196	121069522
wt_h3k4me1.q.05_peak_117772	chr7	114892859	114893213
wt_h3k4me1.q.05_peak_80950	chr3	23216453	23216992
wt_h3k4me1.q.05_peak_83950	chr3	84169694	84170049
wt_h3k4me1.q.05_peak_21017	chr11	50045309	50045609
wt_h3k4me1.q.05_peak_73485	chr2	69830135	69830521
wt_h3k4me1.q.05_peak_104915	chr5	148923248	148924349
wt_h3k4me1.q.05_peak_130547	chr9	72124805	72125326
wt_h3k4me1.q.05_peak_58445	chr17	46084150	46084758
wt_h3k4me1.q.05_peak_37290	chr13	91610403	91610968
wt_h3k4me1.q.05_peak_18870	chr11	9570347	9570958
wt_h3k4me1.q.05_peak_66189	chr18	84275281	84276274
wt_h3k4me1.q.05_peak_5795	chr1	115914914	115915969
wt_h3k4me1.q.05_peak_75503	chr2	106499253	106499648
wt_h3k4me1.q.05_peak_60615	chr17	86204181	86204532
wt_h3k4me1.q.05_peak_80640	chr3	16212036	16212468
wt_h3k4me1.q.05_peak_132748	chr9	111867654	111868788
wt_h3k4me1.q.05_peak_33719	chr13	24787193	24787806
wt_h3k4me1.q.05_peak_51871	chr16	8729232	8730876
wt_h3k4me1.q.05_peak_66441	chr19	3870120	3871793
wt_h3k4me1.q.05_peak_119595	chr8	8539042	8539326
wt_h3k4me1.q.05_peak_91121	chr4	57606222	57607711
wt_h3k4me1.q.05_peak_74316	chr2	83622426	83624241
wt_h3k4me1.q.05_peak_101749	chr5	102060223	102061272
wt_h3k4me1.q.05_peak_49270	chr15	74681950	74682622
wt_h3k4me1.q.05_peak_86228	chr3	122948846	122949237
wt_h3k4me1.q.05_peak_125892	chr8	122941514	122942224
wt_h3k4me1.q.05_peak_6714	chr1	132901378	132901942
wt_h3k4me1.q.05_peak_119694	chr8	9607214	9607483
wt_h3k4me1.q.05_peak_61276	chr18	7132089	7132595
wt_h3k4me1.q.05_peak_86660	chr3	130445956	130446495
wt_h3k4me1.q.05_peak_36361	chr13	69414595	69415395
wt_h3k4me1.q.05_peak_89065	chr4	14775588	14776469
wt_h3k4me1.q.05_peak_98322	chr5	33343008	33343774
wt_h3k4me1.q.05_peak_133921	chrX	15698644	15698991
wt_h3k4me1.q.05_peak_117173	chr7	100856305	100856742
wt_h3k4me1.q.05_peak_110210	chr6	99052088	99052474
wt_h3k4me1.q.05_peak_89632	chr4	31176329	31176718
wt_h3k4me1.q.05_peak_6146	chr1	125381010	125381358
wt_h3k4me1.q.05_peak_119030	chr7	138523271	138523558
wt_h3k4me1.q.05_peak_121873	chr8	47481841	47483227
wt_h3k4me1.q.05_peak_28243	chr12	42880245	42880499
wt_h3k4me1.q.05_peak_18305	chr10	127903058	127903467
wt_h3k4me1.q.05_peak_106370	chr6	31181367	31183252
wt_h3k4me1.q.05_peak_10081	chr1	182858818	182859493
wt_h3k4me1.q.05_peak_4500	chr1	84402812	84403229
wt_h3k4me1.q.05_peak_132359	chr9	106415677	106415929
wt_h3k4me1.q.05_peak_123422	chr8	80962102	80962559
wt_h3k4me1.q.05_peak_111572	chr6	117105007	117105935
wt_h3k4me1.q.05_peak_27824	chr12	34451259	34453182
wt_h3k4me1.q.05_peak_70089	chr2	11034301	11034632
wt_h3k4me1.q.05_peak_42101	chr14	57407098	57407966
wt_h3k4me1.q.05_peak_21158	chr11	52102778	52105283
wt_h3k4me1.q.05_peak_113593	chr7	6810140	6811369
wt_h3k4me1.q.05_peak_99159	chr5	45706679	45707205
wt_h3k4me1.q.05_peak_17864	chr10	121206403	121206706
wt_h3k4me1.q.05_peak_47873	chr15	53878502	53878858
wt_h3k4me1.q.05_peak_6252	chr1	127215124	127216383
wt_h3k4me1.q.05_peak_23884	chr11	93224623	93225172
wt_h3k4me1.q.05_peak_81066	chr3	26145404	26146026
wt_h3k4me1.q.05_peak_105618	chr6	17199781	17200763
wt_h3k4me1.q.05_peak_86938	chr3	136698795	136699172
wt_h3k4me1.q.05_peak_74271	chr2	81610185	81610542
wt_h3k4me1.q.05_peak_59606	chr17	68932994	68933291
wt_h3k4me1.q.05_peak_103835	chr5	130820302	130820761
wt_h3k4me1.q.05_peak_91512	chr4	66314629	66315052
wt_h3k4me1.q.05_peak_100456	chr5	73521218	73521474
wt_h3k4me1.q.05_peak_74524	chr2	90818434	90819179
wt_h3k4me1.q.05_peak_20535	chr11	41959932	41960967
wt_h3k4me1.q.05_peak_131797	chr9	98001137	98001532
wt_h3k4me1.q.05_peak_18123	chr10	125484608	125484939
wt_h3k4me1.q.05_peak_36134	chr13	60723973	60724807
wt_h3k4me1.q.05_peak_29547	chr12	72118769	72119418
wt_h3k4me1.q.05_peak_11449	chr10	12744258	12744559
wt_h3k4me1.q.05_peak_92334	chr4	84942024	84942710
wt_h3k4me1.q.05_peak_90566	chr4	47316471	47316781
wt_h3k4me1.q.05_peak_45895	chr15	14254540	14254848
wt_h3k4me1.q.05_peak_93366	chr4	103508205	103508751
wt_h3k4me1.q.05_peak_121361	chr8	36890646	36890989
wt_h3k4me1.q.05_peak_66159	chr18	83936355	83936614
wt_h3k4me1.q.05_peak_63357	chr18	41881300	41881958
wt_h3k4me1.q.05_peak_71910	chr2	42025693	42026705
wt_h3k4me1.q.05_peak_88519	chr4	4986586	4987180
wt_h3k4me1.q.05_peak_101835	chr5	103250170	103250612
wt_h3k4me1.q.05_peak_101231	chr5	91678840	91679197
wt_h3k4me1.q.05_peak_876	chr1	22781913	22783162
wt_h3k4me1.q.05_peak_132580	chr9	108942670	108942931
wt_h3k4me1.q.05_peak_24646	chr11	103371830	103372891
wt_h3k4me1.q.05_peak_35647	chr13	54967712	54968168
wt_h3k4me1.q.05_peak_45403	chr15	4381220	4381527
wt_h3k4me1.q.05_peak_52659	chr16	21627771	21628386
wt_h3k4me1.q.05_peak_123185	chr8	76474838	76475095
wt_h3k4me1.q.05_peak_134813	chrX	82178724	82179223
wt_h3k4me1.q.05_peak_121161	chr8	34614019	34614370
wt_h3k4me1.q.05_peak_104489	chr5	141994013	141994761
wt_h3k4me1.q.05_peak_89071	chr4	14842651	14843064
wt_h3k4me1.q.05_peak_110524	chr6	102470374	102471188
wt_h3k4me1.q.05_peak_46129	chr15	24701187	24702374
wt_h3k4me1.q.05_peak_42330	chr14	61142393	61144011
wt_h3k4me1.q.05_peak_13337	chr10	45888559	45889852
wt_h3k4me1.q.05_peak_42433	chr14	62827977	62828449
wt_h3k4me1.q.05_peak_55758	chr16	85096754	85097350
wt_h3k4me1.q.05_peak_60155	chr17	79165234	79166438
wt_h3k4me1.q.05_peak_4180	chr1	78821911	78822484
wt_h3k4me1.q.05_peak_101741	chr5	102000295	102001847
wt_h3k4me1.q.05_peak_56920	chr17	8811115	8812907
wt_h3k4me1.q.05_peak_36481	chr13	71112257	71112518
wt_h3k4me1.q.05_peak_5563	chr1	105883995	105884462
wt_h3k4me1.q.05_peak_495	chr1	15056676	15056960
wt_h3k4me1.q.05_peak_17251	chr10	110927365	110927690
wt_h3k4me1.q.05_peak_110009	chr6	94874197	94874486
wt_h3k4me1.q.05_peak_31132	chr12	99223613	99223870
wt_h3k4me1.q.05_peak_57431	chr17	24555819	24556622
wt_h3k4me1.q.05_peak_7952	chr1	154855805	154856126
wt_h3k4me1.q.05_peak_66782	chr19	9946486	9946974
wt_h3k4me1.q.05_peak_14119	chr10	63476118	63477189
wt_h3k4me1.q.05_peak_40278	chr14	23237480	23237753
wt_h3k4me1.q.05_peak_6949	chr1	135501357	135501652
wt_h3k4me1.q.05_peak_70904	chr2	27084524	27085821
wt_h3k4me1.q.05_peak_124443	chr8	97973322	97974356
wt_h3k4me1.q.05_peak_132048	chr9	102468798	102469068
wt_h3k4me1.q.05_peak_123099	chr8	73309750	73311151
wt_h3k4me1.q.05_peak_32840	chr13	9392037	9392342
wt_h3k4me1.q.05_peak_32987	chr13	11599501	11599992
wt_h3k4me1.q.05_peak_53861	chr16	38579377	38579827
wt_h3k4me1.q.05_peak_50909	chr15	95941798	95942146
wt_h3k4me1.q.05_peak_133373	chr9	121329007	121329364
wt_h3k4me1.q.05_peak_119001	chr7	137651136	137651422
wt_h3k4me1.q.05_peak_84167	chr3	86788694	86789045
wt_h3k4me1.q.05_peak_75818	chr2	113176365	113177019
wt_h3k4me1.q.05_peak_99533	chr5	53304716	53305409
wt_h3k4me1.q.05_peak_17895	chr10	121423067	121424795
wt_h3k4me1.q.05_peak_128564	chr9	43944068	43944457
wt_h3k4me1.q.05_peak_122057	chr8	54577104	54577692
wt_h3k4me1.q.05_peak_32520	chr12	117786453	117786980
wt_h3k4me1.q.05_peak_74312	chr2	83337039	83337397
wt_h3k4me1.q.05_peak_45519	chr15	7563673	7564114
wt_h3k4me1.q.05_peak_131295	chr9	87055022	87056116
wt_h3k4me1.q.05_peak_39794	chr14	15171598	15172195
wt_h3k4me1.q.05_peak_24983	chr11	107583924	107585701
wt_h3k4me1.q.05_peak_32103	chr12	111329874	111332933
wt_h3k4me1.q.05_peak_50472	chr15	89527940	89528254
wt_h3k4me1.q.05_peak_79152	chr2	163236421	163236695
wt_h3k4me1.q.05_peak_29905	chr12	77491909	77492493
wt_h3k4me1.q.05_peak_133724	chrX	10556861	10558073
wt_h3k4me1.q.05_peak_90971	chr4	55356924	55359020
wt_h3k4me1.q.05_peak_134532	chrX	67336179	67336540
wt_h3k4me1.q.05_peak_79756	chr2	170760036	170760854
wt_h3k4me1.q.05_peak_70268	chr2	14735518	14736450
wt_h3k4me1.q.05_peak_111859	chr6	120841803	120842247
wt_h3k4me1.q.05_peak_135544	chrX	137068680	137069131
wt_h3k4me1.q.05_peak_20769	chr11	45543994	45544269
wt_h3k4me1.q.05_peak_108490	chr6	70372092	70372442
wt_h3k4me1.q.05_peak_33777	chr13	25729149	25730171
wt_h3k4me1.q.05_peak_129508	chr9	56828131	56828432
wt_h3k4me1.q.05_peak_112371	chr6	134184484	134184838
wt_h3k4me1.q.05_peak_65663	chr18	76665979	76666273
wt_h3k4me1.q.05_peak_40030	chr14	19735250	19735810
wt_h3k4me1.q.05_peak_9690	chr1	177569669	177570062
wt_h3k4me1.q.05_peak_410	chr1	13294786	13297073
wt_h3k4me1.q.05_peak_127701	chr9	30082099	30082371
wt_h3k4me1.q.05_peak_123273	chr8	77681730	77683395
wt_h3k4me1.q.05_peak_104978	chr5	149554683	149555326
wt_h3k4me1.q.05_peak_20673	chr11	43495307	43495746
wt_h3k4me1.q.05_peak_114218	chr7	36966272	36966579
wt_h3k4me1.q.05_peak_115812	chr7	75515664	75516358
wt_h3k4me1.q.05_peak_46935	chr15	36635062	36635424
wt_h3k4me1.q.05_peak_13502	chr10	52877309	52878384
wt_h3k4me1.q.05_peak_106633	chr6	34113637	34114069
wt_h3k4me1.q.05_peak_48329	chr15	62257786	62258526
wt_h3k4me1.q.05_peak_98064	chr5	29004962	29005270
wt_h3k4me1.q.05_peak_74274	chr2	81824447	81825446
wt_h3k4me1.q.05_peak_43737	chr14	80135760	80136261
wt_h3k4me1.q.05_peak_87637	chr3	146318439	146319423
wt_h3k4me1.q.05_peak_84748	chr3	97697689	97698077
wt_h3k4me1.q.05_peak_103215	chr5	122637293	122637712
wt_h3k4me1.q.05_peak_39539	chr14	11756874	11757454
wt_h3k4me1.q.05_peak_16023	chr10	92510486	92512442
wt_h3k4me1.q.05_peak_5427	chr1	100193617	100194202
wt_h3k4me1.q.05_peak_116082	chr7	80841066	80841728
wt_h3k4me1.q.05_peak_83691	chr3	80332819	80333169
wt_h3k4me1.q.05_peak_77423	chr2	136344495	136344814
wt_h3k4me1.q.05_peak_95993	chr4	145149580	145150798
wt_h3k4me1.q.05_peak_6165	chr1	125795871	125796486
wt_h3k4me1.q.05_peak_134232	chrX	42805784	42806225
wt_h3k4me1.q.05_peak_7879	chr1	154418576	154419020
wt_h3k4me1.q.05_peak_81082	chr3	26337510	26338463
wt_h3k4me1.q.05_peak_35130	chr13	47811550	47811891
wt_h3k4me1.q.05_peak_2163	chr1	43497308	43498624
wt_h3k4me1.q.05_peak_55816	chr16	86220565	86221089
wt_h3k4me1.q.05_peak_95711	chr4	140182146	140182408
wt_h3k4me1.q.05_peak_39379	chr14	8459784	8460622
wt_h3k4me1.q.05_peak_14304	chr10	67204487	67205570
wt_h3k4me1.q.05_peak_122696	chr8	68187569	68188722
wt_h3k4me1.q.05_peak_68878	chr19	48601759	48602338
wt_h3k4me1.q.05_peak_17511	chr10	115879502	115879891
wt_h3k4me1.q.05_peak_93225	chr4	102104499	102104814
wt_h3k4me1.q.05_peak_32710	chr13	6449301	6449901
wt_h3k4me1.q.05_peak_111424	chr6	115199752	115200273
wt_h3k4me1.q.05_peak_83755	chr3	80840829	80841441
wt_h3k4me1.q.05_peak_70181	chr2	12978839	12979124
wt_h3k4me1.q.05_peak_26899	chr12	16425059	16427074
wt_h3k4me1.q.05_peak_70588	chr2	20909383	20910283
wt_h3k4me1.q.05_peak_57012	chr17	10328626	10329135
wt_h3k4me1.q.05_peak_19818	chr11	29986806	29987560
wt_h3k4me1.q.05_peak_68114	chr19	36322330	36323760
wt_h3k4me1.q.05_peak_70192	chr2	13089491	13090655
wt_h3k4me1.q.05_peak_105636	chr6	17490410	17491181
wt_h3k4me1.q.05_peak_93965	chr4	114578236	114578553
wt_h3k4me1.q.05_peak_6284	chr1	127344561	127345246
wt_h3k4me1.q.05_peak_21870	chr11	62012541	62012886
wt_h3k4me1.q.05_peak_14751	chr10	73313407	73314276
wt_h3k4me1.q.05_peak_102533	chr5	113851458	113852627
wt_h3k4me1.q.05_peak_121606	chr8	42423637	42424391
wt_h3k4me1.q.05_peak_45530	chr15	7935689	7935971
wt_h3k4me1.q.05_peak_50591	chr15	91560342	91560850
wt_h3k4me1.q.05_peak_86876	chr3	135675491	135675892
wt_h3k4me1.q.05_peak_6016	chr1	121701468	121702517
wt_h3k4me1.q.05_peak_5989	chr1	121320352	121322507
wt_h3k4me1.q.05_peak_34642	chr13	42887271	42887873
wt_h3k4me1.q.05_peak_123368	chr8	79387195	79388820
wt_h3k4me1.q.05_peak_61389	chr18	10102932	10103736
wt_h3k4me1.q.05_peak_98201	chr5	31256117	31256457
wt_h3k4me1.q.05_peak_57436	chr17	24621546	24622296
wt_h3k4me1.q.05_peak_20214	chr11	35286426	35287375
wt_h3k4me1.q.05_peak_35890	chr13	58033619	58034871
wt_h3k4me1.q.05_peak_69567	chr2	4024731	4025022
wt_h3k4me1.q.05_peak_113268	chr6	145833164	145833638
wt_h3k4me1.q.05_peak_96555	chr4	154252495	154253248
wt_h3k4me1.q.05_peak_14363	chr10	67995630	67996118
wt_h3k4me1.q.05_peak_106724	chr6	35518964	35519342
wt_h3k4me1.q.05_peak_32663	chr13	5765648	5765916
wt_h3k4me1.q.05_peak_94431	chr4	123578117	123578454
wt_h3k4me1.q.05_peak_98685	chr5	37365823	37366590
wt_h3k4me1.q.05_peak_12832	chr10	39343655	39343965
wt_h3k4me1.q.05_peak_127288	chr9	26623721	26624155
wt_h3k4me1.q.05_peak_12874	chr10	39516691	39517281
wt_h3k4me1.q.05_peak_85161	chr3	103984236	103984541
wt_h3k4me1.q.05_peak_123369	chr8	79392047	79395371
wt_h3k4me1.q.05_peak_63346	chr18	41545235	41545532
wt_h3k4me1.q.05_peak_50679	chr15	92997722	92998195
wt_h3k4me1.q.05_peak_61407	chr18	10341807	10342154
wt_h3k4me1.q.05_peak_65655	chr18	76289166	76289706
wt_h3k4me1.q.05_peak_136093	chrX	161721091	161722045
wt_h3k4me1.q.05_peak_48221	chr15	59680264	59681139
wt_h3k4me1.q.05_peak_2859	chr1	57205192	57205762
wt_h3k4me1.q.05_peak_123866	chr8	87426634	87426934
wt_h3k4me1.q.05_peak_45193	chr14	121690241	121690858
wt_h3k4me1.q.05_peak_20766	chr11	45462461	45462881
wt_h3k4me1.q.05_peak_107257	chr6	42741864	42743078
wt_h3k4me1.q.05_peak_39604	chr14	12390680	12391151
wt_h3k4me1.q.05_peak_78571	chr2	154595883	154596173
wt_h3k4me1.q.05_peak_31437	chr12	102600653	102601464
wt_h3k4me1.q.05_peak_19998	chr11	32232882	32233368
wt_h3k4me1.q.05_peak_82547	chr3	55409743	55410111
wt_h3k4me1.q.05_peak_33132	chr13	13607700	13608617
wt_h3k4me1.q.05_peak_27743	chr12	33159056	33160335
wt_h3k4me1.q.05_peak_60027	chr17	75026999	75028070
wt_h3k4me1.q.05_peak_50159	chr15	85279976	85280267
wt_h3k4me1.q.05_peak_122943	chr8	71281203	71283190
wt_h3k4me1.q.05_peak_59331	chr17	64720778	64721205
wt_h3k4me1.q.05_peak_88088	chr3	154254254	154254991
wt_h3k4me1.q.05_peak_33285	chr13	17494020	17496351
wt_h3k4me1.q.05_peak_37397	chr13	92803800	92804113
wt_h3k4me1.q.05_peak_19600	chr11	25391285	25392325
wt_h3k4me1.q.05_peak_75442	chr2	104781190	104781520
wt_h3k4me1.q.05_peak_109934	chr6	94140885	94142811
wt_h3k4me1.q.05_peak_54756	chr16	58080265	58080755
wt_h3k4me1.q.05_peak_41722	chr14	47995440	47995779
wt_h3k4me1.q.05_peak_126228	chr8	126222117	126222896
wt_h3k4me1.q.05_peak_40337	chr14	23636267	23637391
wt_h3k4me1.q.05_peak_54755	chr16	58027429	58027966
wt_h3k4me1.q.05_peak_17978	chr10	122749104	122749673
wt_h3k4me1.q.05_peak_64354	chr18	59253376	59254007
wt_h3k4me1.q.05_peak_103577	chr5	127129458	127130117
wt_h3k4me1.q.05_peak_128777	chr9	46213688	46216173
wt_h3k4me1.q.05_peak_6147	chr1	125395651	125395953
wt_h3k4me1.q.05_peak_113115	chr6	143862379	143864168
wt_h3k4me1.q.05_peak_8077	chr1	156571469	156571791
wt_h3k4me1.q.05_peak_62651	chr18	32974884	32975465
wt_h3k4me1.q.05_peak_98821	chr5	39736873	39737248
wt_h3k4me1.q.05_peak_77661	chr2	140491282	140491656
wt_h3k4me1.q.05_peak_47323	chr15	41537510	41537936
wt_h3k4me1.q.05_peak_6332	chr1	127838720	127839196
wt_h3k4me1.q.05_peak_86287	chr3	123708477	123709297
wt_h3k4me1.q.05_peak_130594	chr9	72707648	72707982
wt_h3k4me1.q.05_peak_131154	chr9	84252862	84253770
wt_h3k4me1.q.05_peak_118554	chr7	127755020	127757317
wt_h3k4me1.q.05_peak_100364	chr5	72548679	72549720
wt_h3k4me1.q.05_peak_119297	chr7	142869538	142870264
wt_h3k4me1.q.05_peak_55382	chr16	75231887	75234133
wt_h3k4me1.q.05_peak_65569	chr18	75478544	75479025
wt_h3k4me1.q.05_peak_86908	chr3	136186474	136187037
wt_h3k4me1.q.05_peak_12478	chr10	29159583	29162096
wt_h3k4me1.q.05_peak_96230	chr4	150527930	150528906
wt_h3k4me1.q.05_peak_30385	chr12	83915582	83916120
wt_h3k4me1.q.05_peak_81751	chr3	37546709	37547199
wt_h3k4me1.q.05_peak_26085	chr11	121143937	121144712
wt_h3k4me1.q.05_peak_49247	chr15	74570386	74571708
wt_h3k4me1.q.05_peak_123285	chr8	78030048	78030899
wt_h3k4me1.q.05_peak_47798	chr15	53181048	53182226
wt_h3k4me1.q.05_peak_25488	chr11	114563102	114563728
wt_h3k4me1.q.05_peak_75453	chr2	105261593	105261960
wt_h3k4me1.q.05_peak_32859	chr13	9485231	9486359
wt_h3k4me1.q.05_peak_27640	chr12	31946613	31946888
wt_h3k4me1.q.05_peak_43593	chr14	78519983	78520730
wt_h3k4me1.q.05_peak_119588	chr8	8441651	8442653
wt_h3k4me1.q.05_peak_55458	chr16	76825271	76825630
wt_h3k4me1.q.05_peak_86259	chr3	123460742	123461713
wt_h3k4me1.q.05_peak_44249	chr14	101516492	101517126
wt_h3k4me1.q.05_peak_5851	chr1	118487515	118488464
wt_h3k4me1.q.05_peak_77503	chr2	137002973	137003909
wt_h3k4me1.q.05_peak_121146	chr8	34465529	34466196
wt_h3k4me1.q.05_peak_116384	chr7	89249485	89250668
wt_h3k4me1.q.05_peak_78376	chr2	151762917	151763231
wt_h3k4me1.q.05_peak_71840	chr2	39068810	39069255
wt_h3k4me1.q.05_peak_87347	chr3	142117316	142118139
wt_h3k4me1.q.05_peak_61703	chr18	15465511	15466122
wt_h3k4me1.q.05_peak_21676	chr11	59702809	59703122
wt_h3k4me1.q.05_peak_14781	chr10	73968459	73968747
wt_h3k4me1.q.05_peak_132201	chr9	104463072	104463459
wt_h3k4me1.q.05_peak_28449	chr12	46869883	46870251
wt_h3k4me1.q.05_peak_21176	chr11	52401629	52402200
wt_h3k4me1.q.05_peak_40834	chr14	29557523	29558096
wt_h3k4me1.q.05_peak_93494	chr4	104568602	104568930
wt_h3k4me1.q.05_peak_115431	chr7	67454789	67455337
wt_h3k4me1.q.05_peak_109110	chr6	84153248	84153568
wt_h3k4me1.q.05_peak_2200	chr1	43858614	43859298
wt_h3k4me1.q.05_peak_97537	chr5	20877315	20878477
wt_h3k4me1.q.05_peak_114800	chr7	51840106	51840865
wt_h3k4me1.q.05_peak_33062	chr13	12067039	12067295
wt_h3k4me1.q.05_peak_22516	chr11	72196270	72196931
wt_h3k4me1.q.05_peak_20401	chr11	37083119	37083487
wt_h3k4me1.q.05_peak_31213	chr12	100002990	100003566
wt_h3k4me1.q.05_peak_73296	chr2	67578639	67580008
wt_h3k4me1.q.05_peak_22570	chr11	72928034	72929197
wt_h3k4me1.q.05_peak_72019	chr2	44143147	44143721
wt_h3k4me1.q.05_peak_121982	chr8	49159222	49159698
wt_h3k4me1.q.05_peak_24953	chr11	107217311	107217814
wt_h3k4me1.q.05_peak_83715	chr3	80619760	80620025
wt_h3k4me1.q.05_peak_103956	chr5	132374805	132375740
wt_h3k4me1.q.05_peak_87350	chr3	142151295	142152367
wt_h3k4me1.q.05_peak_42156	chr14	57967340	57967699
wt_h3k4me1.q.05_peak_83508	chr3	78614233	78614716
wt_h3k4me1.q.05_peak_90980	chr4	55409671	55410109
wt_h3k4me1.q.05_peak_108689	chr6	73256542	73257250
wt_h3k4me1.q.05_peak_100788	chr5	81029994	81030675
wt_h3k4me1.q.05_peak_135941	chrX	158031010	158031657
wt_h3k4me1.q.05_peak_112643	chr6	136140435	136140948
wt_h3k4me1.q.05_peak_106729	chr6	35528903	35531240
wt_h3k4me1.q.05_peak_105915	chr6	23410634	23411881
wt_h3k4me1.q.05_peak_75911	chr2	114333496	114333840
wt_h3k4me1.q.05_peak_44078	chr14	97588491	97588859
wt_h3k4me1.q.05_peak_15597	chr10	86145486	86146569
wt_h3k4me1.q.05_peak_94478	chr4	124302683	124303689
wt_h3k4me1.q.05_peak_92820	chr4	95385721	95386541
wt_h3k4me1.q.05_peak_52409	chr16	17381302	17381665
wt_h3k4me1.q.05_peak_66499	chr19	4789583	4790417
wt_h3k4me1.q.05_peak_119354	chr7	144097213	144097698
wt_h3k4me1.q.05_peak_23753	chr11	89977996	89978846
wt_h3k4me1.q.05_peak_67232	chr19	21226785	21228218
wt_h3k4me1.q.05_peak_90233	chr4	43410837	43411167
wt_h3k4me1.q.05_peak_28426	chr12	46419194	46419825
wt_h3k4me1.q.05_peak_108539	chr6	71549652	71550360
wt_h3k4me1.q.05_peak_117940	chr7	117859632	117860227
wt_h3k4me1.q.05_peak_127003	chr9	21397262	21397666
wt_h3k4me1.q.05_peak_60366	chr17	81586200	81586609
wt_h3k4me1.q.05_peak_122345	chr8	61275428	61276538
wt_h3k4me1.q.05_peak_136203	chrX	165188304	165188567
wt_h3k4me1.q.05_peak_40115	chr14	20720035	20720348
wt_h3k4me1.q.05_peak_95470	chr4	137874276	137877459
wt_h3k4me1.q.05_peak_14818	chr10	74917402	74917755
wt_h3k4me1.q.05_peak_82899	chr3	61400792	61401223
wt_h3k4me1.q.05_peak_104681	chr5	144892450	144892730
wt_h3k4me1.q.05_peak_111850	chr6	120739549	120740379
wt_h3k4me1.q.05_peak_81000	chr3	25482992	25483682
wt_h3k4me1.q.05_peak_19693	chr11	27721197	27722053
wt_h3k4me1.q.05_peak_13187	chr10	43035762	43036015
wt_h3k4me1.q.05_peak_50754	chr15	93916689	93917971
wt_h3k4me1.q.05_peak_16308	chr10	95904520	95905550
wt_h3k4me1.q.05_peak_15474	chr10	83776867	83777384
wt_h3k4me1.q.05_peak_107552	chr6	50334695	50336370
wt_h3k4me1.q.05_peak_129104	chr9	50741881	50742304
wt_h3k4me1.q.05_peak_123010	chr8	72537778	72538208
wt_h3k4me1.q.05_peak_39513	chr14	11563271	11563787
wt_h3k4me1.q.05_peak_87965	chr3	152877033	152877497
wt_h3k4me1.q.05_peak_32106	chr12	111350450	111350759
wt_h3k4me1.q.05_peak_123209	chr8	77085360	77087202
wt_h3k4me1.q.05_peak_73988	chr2	77464072	77464787
wt_h3k4me1.q.05_peak_87055	chr3	137762416	137762795
wt_h3k4me1.q.05_peak_73786	chr2	73648110	73648409
wt_h3k4me1.q.05_peak_57040	chr17	11107793	11108788
wt_h3k4me1.q.05_peak_117589	chr7	112253378	112253856
wt_h3k4me1.q.05_peak_97959	chr5	27254744	27255382
wt_h3k4me1.q.05_peak_26866	chr12	15977961	15978856
wt_h3k4me1.q.05_peak_110567	chr6	103517142	103518023
wt_h3k4me1.q.05_peak_67199	chr19	20385898	20386561
wt_h3k4me1.q.05_peak_103488	chr5	125618550	125619108
wt_h3k4me1.q.05_peak_136205	chrX	165308146	165308554
wt_h3k4me1.q.05_peak_61753	chr18	16627170	16627523
wt_h3k4me1.q.05_peak_118899	chr7	134439111	134439432
wt_h3k4me1.q.05_peak_3141	chr1	61052335	61052764
wt_h3k4me1.q.05_peak_97412	chr5	20102821	20103263
wt_h3k4me1.q.05_peak_82831	chr3	60291883	60292507
wt_h3k4me1.q.05_peak_114444	chr7	45299276	45299849
wt_h3k4me1.q.05_peak_62938	chr18	36202101	36203089
wt_h3k4me1.q.05_peak_133330	chr9	120826859	120827817
wt_h3k4me1.q.05_peak_124029	chr8	90730838	90731125
wt_h3k4me1.q.05_peak_61333	chr18	8665073	8665924
wt_h3k4me1.q.05_peak_95884	chr4	142222297	142222878
wt_h3k4me1.q.05_peak_74953	chr2	96380834	96381392
wt_h3k4me1.q.05_peak_110043	chr6	95504771	95505029
wt_h3k4me1.q.05_peak_68827	chr19	47725327	47726053
wt_h3k4me1.q.05_peak_113249	chr6	145433367	145433902
wt_h3k4me1.q.05_peak_49108	chr15	73369291	73369751
wt_h3k4me1.q.05_peak_107179	chr6	41113139	41113563
wt_h3k4me1.q.05_peak_40396	chr14	23865958	23866430
wt_h3k4me1.q.05_peak_60952	chr17	90545918	90546880
wt_h3k4me1.q.05_peak_25786	chr11	118193879	118194733
wt_h3k4me1.q.05_peak_74923	chr2	95483607	95483924
wt_h3k4me1.q.05_peak_124878	chr8	106991410	106991776
wt_h3k4me1.q.05_peak_107536	chr6	50159690	50160006
wt_h3k4me1.q.05_peak_100576	chr5	74804114	74805141
wt_h3k4me1.q.05_peak_13059	chr10	41385610	41386150
wt_h3k4me1.q.05_peak_61050	chr17	91446884	91447433
wt_h3k4me1.q.05_peak_122996	chr8	72391862	72392730
wt_h3k4me1.q.05_peak_83848	chr3	82121941	82122521
wt_h3k4me1.q.05_peak_85525	chr3	108293013	108293381
wt_h3k4me1.q.05_peak_23304	chr11	82254723	82255397
wt_h3k4me1.q.05_peak_79703	chr2	169888650	169889015
wt_h3k4me1.q.05_peak_68382	chr19	41502308	41502813
wt_h3k4me1.q.05_peak_61229	chr18	6406915	6407927
wt_h3k4me1.q.05_peak_47855	chr15	53678590	53678976
wt_h3k4me1.q.05_peak_88874	chr4	11489371	11490048
wt_h3k4me1.q.05_peak_32231	chr12	112376289	112377287
wt_h3k4me1.q.05_peak_80568	chr3	13242323	13242952
wt_h3k4me1.q.05_peak_33540	chr13	20988466	20988923
wt_h3k4me1.q.05_peak_71808	chr2	38579535	38579899
wt_h3k4me1.q.05_peak_88522	chr4	5126081	5126433
wt_h3k4me1.q.05_peak_99763	chr5	62320458	62321307
wt_h3k4me1.q.05_peak_13239	chr10	43655562	43656072
wt_h3k4me1.q.05_peak_125383	chr8	116652765	116653073
wt_h3k4me1.q.05_peak_27999	chr12	37908271	37908713
wt_h3k4me1.q.05_peak_90330	chr4	45057616	45058402
wt_h3k4me1.q.05_peak_54655	chr16	55663960	55664319
wt_h3k4me1.q.05_peak_134524	chrX	66660874	66661694
wt_h3k4me1.q.05_peak_97287	chr5	17844018	17844369
wt_h3k4me1.q.05_peak_131021	chr9	81313051	81314019
wt_h3k4me1.q.05_peak_114949	chr7	57299080	57299537
wt_h3k4me1.q.05_peak_71623	chr2	35699499	35700084
wt_h3k4me1.q.05_peak_513	chr1	15538818	15539883
wt_h3k4me1.q.05_peak_53236	chr16	31190298	31191353
wt_h3k4me1.q.05_peak_52945	chr16	26592339	26593042
wt_h3k4me1.q.05_peak_273	chr1	10327887	10328202
wt_h3k4me1.q.05_peak_129468	chr9	56652180	56652434
wt_h3k4me1.q.05_peak_14096	chr10	63142654	63143115
wt_h3k4me1.q.05_peak_21484	chr11	57077180	57077472
wt_h3k4me1.q.05_peak_108659	chr6	72755526	72755911
wt_h3k4me1.q.05_peak_54097	chr16	42296591	42297454
wt_h3k4me1.q.05_peak_134089	chrX	36601621	36602956
wt_h3k4me1.q.05_peak_116336	chr7	87835507	87835773
wt_h3k4me1.q.05_peak_99572	chr5	53933220	53933889
wt_h3k4me1.q.05_peak_106998	chr6	39060614	39061577
wt_h3k4me1.q.05_peak_123894	chr8	87884521	87884820
wt_h3k4me1.q.05_peak_12748	chr10	36982323	36983415
wt_h3k4me1.q.05_peak_113378	chr6	147273876	147274397
wt_h3k4me1.q.05_peak_27846	chr12	34641858	34642518
wt_h3k4me1.q.05_peak_7818	chr1	153674869	153675134
wt_h3k4me1.q.05_peak_48390	chr15	64029383	64029673
wt_h3k4me1.q.05_peak_134494	chrX	61510400	61510708
wt_h3k4me1.q.05_peak_70712	chr2	23026702	23027157
wt_h3k4me1.q.05_peak_123618	chr8	84435830	84436321
wt_h3k4me1.q.05_peak_136181	chrX	164359420	164359820
wt_h3k4me1.q.05_peak_19761	chr11	29389054	29390234
wt_h3k4me1.q.05_peak_24982	chr11	107577091	107578248
wt_h3k4me1.q.05_peak_16911	chr10	108284491	108284841
wt_h3k4me1.q.05_peak_84990	chr3	101579947	101580338
wt_h3k4me1.q.05_peak_40099	chr14	20519353	20520897
wt_h3k4me1.q.05_peak_43845	chr14	86364093	86364625
wt_h3k4me1.q.05_peak_55000	chr16	65629451	65629789
wt_h3k4me1.q.05_peak_83746	chr3	80778951	80779629
wt_h3k4me1.q.05_peak_16724	chr10	105563839	105565241
wt_h3k4me1.q.05_peak_66392	chr18	90109590	90110591
wt_h3k4me1.q.05_peak_114965	chr7	57493067	57493489
wt_h3k4me1.q.05_peak_69161	chr19	55575658	55577219
wt_h3k4me1.q.05_peak_30147	chr12	81615289	81615745
wt_h3k4me1.q.05_peak_108705	chr6	73715560	73716310
wt_h3k4me1.q.05_peak_109541	chr6	89560783	89561061
wt_h3k4me1.q.05_peak_16660	chr10	103805596	103805943
wt_h3k4me1.q.05_peak_122168	chr8	57435477	57436713
wt_h3k4me1.q.05_peak_86634	chr3	130128066	130129185
wt_h3k4me1.q.05_peak_15570	chr10	85473437	85474478
wt_h3k4me1.q.05_peak_89630	chr4	31076215	31076798
wt_h3k4me1.q.05_peak_115527	chr7	68717465	68718182
wt_h3k4me1.q.05_peak_11030	chr10	5846132	5846570
wt_h3k4me1.q.05_peak_92202	chr4	82555236	82555618
wt_h3k4me1.q.05_peak_120962	chr8	31428033	31428512
wt_h3k4me1.q.05_peak_86460	chr3	127235137	127236018
wt_h3k4me1.q.05_peak_89677	chr4	31988845	31989143
wt_h3k4me1.q.05_peak_86971	chr3	136810771	136811033
wt_h3k4me1.q.05_peak_91194	chr4	58890868	58891157
wt_h3k4me1.q.05_peak_100783	chr5	80953161	80953419
wt_h3k4me1.q.05_peak_84628	chr3	95793090	95793392
wt_h3k4me1.q.05_peak_19772	chr11	29638637	29639412
wt_h3k4me1.q.05_peak_56892	chr17	8545324	8546128
wt_h3k4me1.q.05_peak_49496	chr15	78083262	78084121
wt_h3k4me1.q.05_peak_89950	chr4	36223888	36224579
wt_h3k4me1.q.05_peak_26561	chr12	9622950	9623255
wt_h3k4me1.q.05_peak_76978	chr2	131054598	131055260
wt_h3k4me1.q.05_peak_68744	chr19	46837679	46838533
wt_h3k4me1.q.05_peak_50549	chr15	91041683	91042537
wt_h3k4me1.q.05_peak_102244	chr5	111220765	111221297
wt_h3k4me1.q.05_peak_62025	chr18	22979255	22979555
wt_h3k4me1.q.05_peak_71804	chr2	38529118	38530196
wt_h3k4me1.q.05_peak_24712	chr11	104150730	104151002
wt_h3k4me1.q.05_peak_18040	chr10	123190317	123191064
wt_h3k4me1.q.05_peak_40481	chr14	24799763	24800137
wt_h3k4me1.q.05_peak_13960	chr10	61010257	61010871
wt_h3k4me1.q.05_peak_126225	chr8	126208325	126208762
wt_h3k4me1.q.05_peak_134539	chrX	68245409	68246315
wt_h3k4me1.q.05_peak_16830	chr10	107173806	107174312
wt_h3k4me1.q.05_peak_84399	chr3	89603263	89603786
wt_h3k4me1.q.05_peak_51620	chr16	5786885	5787278
wt_h3k4me1.q.05_peak_100934	chr5	84229902	84230304
wt_h3k4me1.q.05_peak_66819	chr19	10411804	10413734
wt_h3k4me1.q.05_peak_27696	chr12	32884281	32884609
wt_h3k4me1.q.05_peak_68469	chr19	42423719	42424026
wt_h3k4me1.q.05_peak_62437	chr18	28441316	28441587
wt_h3k4me1.q.05_peak_61685	chr18	15115331	15116157
wt_h3k4me1.q.05_peak_6630	chr1	132222172	132223529
wt_h3k4me1.q.05_peak_100147	chr5	67321694	67321981
wt_h3k4me1.q.05_peak_86019	chr3	119503530	119503917
wt_h3k4me1.q.05_peak_48483	chr15	64496166	64496439
wt_h3k4me1.q.05_peak_112876	chr6	140050974	140051639
wt_h3k4me1.q.05_peak_31382	chr12	102009933	102010405
wt_h3k4me1.q.05_peak_61642	chr18	14657560	14657843
wt_h3k4me1.q.05_peak_25877	chr11	118747585	118747871
wt_h3k4me1.q.05_peak_17558	chr10	116448890	116449833
wt_h3k4me1.q.05_peak_107200	chr6	41646595	41647040
wt_h3k4me1.q.05_peak_80305	chr3	5355926	5356252
wt_h3k4me1.q.05_peak_20967	chr11	49324809	49325123
wt_h3k4me1.q.05_peak_37970	chr13	99332002	99332447
wt_h3k4me1.q.05_peak_20477	chr11	40683498	40683881
wt_h3k4me1.q.05_peak_68845	chr19	48111132	48112160
wt_h3k4me1.q.05_peak_88323	chr3	157927055	157927498
wt_h3k4me1.q.05_peak_115548	chr7	70624380	70626160
wt_h3k4me1.q.05_peak_56165	chr16	92955223	92956068
wt_h3k4me1.q.05_peak_132551	chr9	108545482	108546385
wt_h3k4me1.q.05_peak_52172	chr16	12389102	12389904
wt_h3k4me1.q.05_peak_95181	chr4	133236659	133236921
wt_h3k4me1.q.05_peak_73655	chr2	72003273	72004039
wt_h3k4me1.q.05_peak_47791	chr15	53146967	53147223
wt_h3k4me1.q.05_peak_75271	chr2	102863749	102864336
wt_h3k4me1.q.05_peak_10416	chr1	189576491	189576938
wt_h3k4me1.q.05_peak_47066	chr15	37769992	37770372
wt_h3k4me1.q.05_peak_55214	chr16	72355103	72355847
wt_h3k4me1.q.05_peak_119754	chr8	10231073	10231866
wt_h3k4me1.q.05_peak_55096	chr16	67431476	67431865
wt_h3k4me1.q.05_peak_133104	chr9	117144071	117144547
wt_h3k4me1.q.05_peak_115039	chr7	58764871	58765240
wt_h3k4me1.q.05_peak_14438	chr10	69337344	69338246
wt_h3k4me1.q.05_peak_102314	chr5	111850029	111850603
wt_h3k4me1.q.05_peak_71889	chr2	41498300	41498644
wt_h3k4me1.q.05_peak_40492	chr14	24868291	24869999
wt_h3k4me1.q.05_peak_101111	chr5	89701273	89703290
wt_h3k4me1.q.05_peak_50699	chr15	93404534	93404818
wt_h3k4me1.q.05_peak_100872	chr5	81717793	81718162
wt_h3k4me1.q.05_peak_20912	chr11	48050939	48051616
wt_h3k4me1.q.05_peak_122672	chr8	67901360	67902038
wt_h3k4me1.q.05_peak_40116	chr14	20730473	20731976
wt_h3k4me1.q.05_peak_47978	chr15	55734751	55735370
wt_h3k4me1.q.05_peak_23899	chr11	93463583	93464601
wt_h3k4me1.q.05_peak_45669	chr15	11132123	11132401
wt_h3k4me1.q.05_peak_90323	chr4	44983596	44983850
wt_h3k4me1.q.05_peak_97115	chr5	14087939	14088997
wt_h3k4me1.q.05_peak_14788	chr10	74112540	74112888
wt_h3k4me1.q.05_peak_70245	chr2	14130980	14131861
wt_h3k4me1.q.05_peak_76688	chr2	126607403	126607959
wt_h3k4me1.q.05_peak_32846	chr13	9414892	9418904
wt_h3k4me1.q.05_peak_65955	chr18	80567742	80568067
wt_h3k4me1.q.05_peak_80973	chr3	24609036	24609391
wt_h3k4me1.q.05_peak_78410	chr2	152278532	152278918
wt_h3k4me1.q.05_peak_95658	chr4	139267894	139268305
wt_h3k4me1.q.05_peak_13797	chr10	58903661	58903928
wt_h3k4me1.q.05_peak_19327	chr11	21051119	21052594
wt_h3k4me1.q.05_peak_2379	chr1	51125271	51126205
wt_h3k4me1.q.05_peak_36434	chr13	70363716	70364617
wt_h3k4me1.q.05_peak_689	chr1	20724588	20724844
wt_h3k4me1.q.05_peak_4142	chr1	78451315	78451699
wt_h3k4me1.q.05_peak_108309	chr6	64490463	64491508
wt_h3k4me1.q.05_peak_53011	chr16	28389083	28389758
wt_h3k4me1.q.05_peak_39417	chr14	9467923	9468301
wt_h3k4me1.q.05_peak_18471	chr11	3992237	3992806
wt_h3k4me1.q.05_peak_13527	chr10	53101497	53101800
wt_h3k4me1.q.05_peak_55393	chr16	75378815	75379069
wt_h3k4me1.q.05_peak_20460	chr11	39972600	39973354
wt_h3k4me1.q.05_peak_53048	chr16	28700378	28700985
wt_h3k4me1.q.05_peak_63563	chr18	44447663	44447916
wt_h3k4me1.q.05_peak_102956	chr5	118758723	118759021
wt_h3k4me1.q.05_peak_41188	chr14	34508688	34509088
wt_h3k4me1.q.05_peak_117043	chr7	99478533	99478832
wt_h3k4me1.q.05_peak_83767	chr3	80903639	80903972
wt_h3k4me1.q.05_peak_80953	chr3	23520110	23520511
wt_h3k4me1.q.05_peak_67686	chr19	27935523	27936072
wt_h3k4me1.q.05_peak_43489	chr14	77324206	77325190
wt_h3k4me1.q.05_peak_28635	chr12	51865061	51866498
wt_h3k4me1.q.05_peak_77078	chr2	131952867	131953276
wt_h3k4me1.q.05_peak_91995	chr4	77906207	77906936
wt_h3k4me1.q.05_peak_38378	chr13	104968068	104968469
wt_h3k4me1.q.05_peak_38788	chr13	110402049	110402373
wt_h3k4me1.q.05_peak_12226	chr10	25451890	25452452
wt_h3k4me1.q.05_peak_23325	chr11	82596414	82597177
wt_h3k4me1.q.05_peak_68470	chr19	42425696	42426071
wt_h3k4me1.q.05_peak_13390	chr10	49435633	49437544
wt_h3k4me1.q.05_peak_26093	chr11	121263434	121263851
wt_h3k4me1.q.05_peak_85876	chr3	117479680	117480599
wt_h3k4me1.q.05_peak_47402	chr15	42369952	42370768
wt_h3k4me1.q.05_peak_124945	chr8	108921564	108921970
wt_h3k4me1.q.05_peak_22989	chr11	78652092	78652357
wt_h3k4me1.q.05_peak_74252	chr2	80786261	80786921
wt_h3k4me1.q.05_peak_94987	chr4	130716043	130716466
wt_h3k4me1.q.05_peak_87494	chr3	144372751	144373445
wt_h3k4me1.q.05_peak_106085	chr6	28233324	28234359
wt_h3k4me1.q.05_peak_13354	chr10	46197750	46198099
wt_h3k4me1.q.05_peak_98909	chr5	42311106	42311702
wt_h3k4me1.q.05_peak_40412	chr14	23938660	23939342
wt_h3k4me1.q.05_peak_37539	chr13	94229327	94230083
wt_h3k4me1.q.05_peak_79839	chr2	172792543	172793263
wt_h3k4me1.q.05_peak_11888	chr10	20136506	20136828
wt_h3k4me1.q.05_peak_99406	chr5	51990418	51990959
wt_h3k4me1.q.05_peak_85098	chr3	103306415	103306960
wt_h3k4me1.q.05_peak_51055	chr15	98744746	98745630
wt_h3k4me1.q.05_peak_78611	chr2	155453545	155454187
wt_h3k4me1.q.05_peak_36929	chr13	82483688	82483971
wt_h3k4me1.q.05_peak_129749	chr9	60318488	60319257
wt_h3k4me1.q.05_peak_97209	chr5	16015874	16016539
wt_h3k4me1.q.05_peak_60984	chr17	90744796	90745215
wt_h3k4me1.q.05_peak_80678	chr3	17630276	17630859
wt_h3k4me1.q.05_peak_70727	chr2	23991993	23992295
wt_h3k4me1.q.05_peak_134905	chrX	87814196	87814781
wt_h3k4me1.q.05_peak_4144	chr1	78484097	78486163
wt_h3k4me1.q.05_peak_36914	chr13	82040044	82040587
wt_h3k4me1.q.05_peak_55477	chr16	77128458	77128795
wt_h3k4me1.q.05_peak_79625	chr2	168418859	168419275
wt_h3k4me1.q.05_peak_66076	chr18	82672389	82673171
wt_h3k4me1.q.05_peak_117986	chr7	118673274	118673802
wt_h3k4me1.q.05_peak_31478	chr12	102790645	102791669
wt_h3k4me1.q.05_peak_33686	chr13	24316843	24317165
wt_h3k4me1.q.05_peak_124629	chr8	103644220	103645418
wt_h3k4me1.q.05_peak_93149	chr4	101229409	101229714
wt_h3k4me1.q.05_peak_32404	chr12	116941880	116942603
wt_h3k4me1.q.05_peak_57518	chr17	25688125	25688402
wt_h3k4me1.q.05_peak_130417	chr9	70004533	70005457
wt_h3k4me1.q.05_peak_88839	chr4	10878015	10879202
wt_h3k4me1.q.05_peak_93125	chr4	100920918	100921224
wt_h3k4me1.q.05_peak_99842	chr5	63712705	63713420
wt_h3k4me1.q.05_peak_117412	chr7	109620544	109621125
wt_h3k4me1.q.05_peak_109468	chr6	88777291	88777941
wt_h3k4me1.q.05_peak_6232	chr1	126925213	126926277
wt_h3k4me1.q.05_peak_11884	chr10	20112052	20112709
wt_h3k4me1.q.05_peak_118761	chr7	132305595	132306296
wt_h3k4me1.q.05_peak_25357	chr11	113158785	113159105
wt_h3k4me1.q.05_peak_8229	chr1	158040118	158041295
wt_h3k4me1.q.05_peak_18032	chr10	123135891	123136439
wt_h3k4me1.q.05_peak_84815	chr3	98309382	98309699
wt_h3k4me1.q.05_peak_77293	chr2	135198143	135198915
wt_h3k4me1.q.05_peak_68070	chr19	34891163	34891701
wt_h3k4me1.q.05_peak_45442	chr15	5258991	5259423
wt_h3k4me1.q.05_peak_54440	chr16	49574966	49575707
wt_h3k4me1.q.05_peak_116421	chr7	89669302	89670027
wt_h3k4me1.q.05_peak_81332	chr3	30608133	30609276
wt_h3k4me1.q.05_peak_81753	chr3	37569278	37570228
wt_h3k4me1.q.05_peak_44514	chr14	105921112	105923239
wt_h3k4me1.q.05_peak_112369	chr6	134179614	134180486
wt_h3k4me1.q.05_peak_83070	chr3	65884330	65885483
wt_h3k4me1.q.05_peak_31030	chr12	98013976	98014705
wt_h3k4me1.q.05_peak_48488	chr15	64557234	64557605
wt_h3k4me1.q.05_peak_13807	chr10	58940821	58941664
wt_h3k4me1.q.05_peak_84586	chr3	95091715	95092195
wt_h3k4me1.q.05_peak_76378	chr2	121239501	121240163
wt_h3k4me1.q.05_peak_106071	chr6	28094267	28095443
wt_h3k4me1.q.05_peak_106478	chr6	32376900	32378015
wt_h3k4me1.q.05_peak_25190	chr11	109784999	109786192
wt_h3k4me1.q.05_peak_104876	chr5	148453434	148454698
wt_h3k4me1.q.05_peak_25872	chr11	118732608	118732956
wt_h3k4me1.q.05_peak_131003	chr9	80238905	80239460
wt_h3k4me1.q.05_peak_96830	chr5	5206130	5206471
wt_h3k4me1.q.05_peak_3275	chr1	63722073	63722326
wt_h3k4me1.q.05_peak_17742	chr10	119111600	119112425
wt_h3k4me1.q.05_peak_77787	chr2	142698584	142698915
wt_h3k4me1.q.05_peak_76608	chr2	124990995	124991690
wt_h3k4me1.q.05_peak_119900	chr8	11844606	11844916
wt_h3k4me1.q.05_peak_116427	chr7	89735679	89736306
wt_h3k4me1.q.05_peak_23928	chr11	93653400	93653930
wt_h3k4me1.q.05_peak_58875	chr17	52980581	52981603
wt_h3k4me1.q.05_peak_81308	chr3	29583082	29583453
wt_h3k4me1.q.05_peak_82424	chr3	53984562	53985077
wt_h3k4me1.q.05_peak_39309	chr14	7843273	7844351
wt_h3k4me1.q.05_peak_62276	chr18	25517317	25518146
wt_h3k4me1.q.05_peak_109131	chr6	84474918	84475300
wt_h3k4me1.q.05_peak_12617	chr10	32628750	32629575
wt_h3k4me1.q.05_peak_133017	chr9	115195131	115195557
wt_h3k4me1.q.05_peak_131726	chr9	97426939	97427207
wt_h3k4me1.q.05_peak_86543	chr3	128002508	128003740
wt_h3k4me1.q.05_peak_116145	chr7	81872655	81872914
wt_h3k4me1.q.05_peak_73837	chr2	74462792	74464517
wt_h3k4me1.q.05_peak_105048	chr5	150358504	150359180
wt_h3k4me1.q.05_peak_125363	chr8	116257688	116258593
wt_h3k4me1.q.05_peak_84365	chr3	89262544	89262861
wt_h3k4me1.q.05_peak_108249	chr6	62379658	62380218
wt_h3k4me1.q.05_peak_6133	chr1	124809299	124810142
wt_h3k4me1.q.05_peak_119841	chr8	11296991	11298013
wt_h3k4me1.q.05_peak_108990	chr6	82411801	82412236
wt_h3k4me1.q.05_peak_2049	chr1	42351704	42353254
wt_h3k4me1.q.05_peak_1256	chr1	30867223	30867584
wt_h3k4me1.q.05_peak_97112	chr5	14039241	14039948
wt_h3k4me1.q.05_peak_81054	chr3	26046512	26047180
wt_h3k4me1.q.05_peak_55285	chr16	73754529	73755008
wt_h3k4me1.q.05_peak_110382	chr6	100852769	100853561
wt_h3k4me1.q.05_peak_114848	chr7	55009192	55010289
wt_h3k4me1.q.05_peak_10474	chr1	190816275	190816714
wt_h3k4me1.q.05_peak_1519	chr1	35803159	35803447
wt_h3k4me1.q.05_peak_93279	chr4	102544970	102546094
wt_h3k4me1.q.05_peak_12780	chr10	37799039	37799798
wt_h3k4me1.q.05_peak_13670	chr10	56164068	56164532
wt_h3k4me1.q.05_peak_65088	chr18	68034778	68035114
wt_h3k4me1.q.05_peak_29236	chr12	67213710	67214075
wt_h3k4me1.q.05_peak_51260	chr15	100903391	100903989
wt_h3k4me1.q.05_peak_101267	chr5	92142108	92143489
wt_h3k4me1.q.05_peak_3354	chr1	64359396	64360640
wt_h3k4me1.q.05_peak_133719	chrX	10532983	10534323
wt_h3k4me1.q.05_peak_119679	chr8	9459308	9460953
wt_h3k4me1.q.05_peak_8839	chr1	165914220	165914710
wt_h3k4me1.q.05_peak_43885	chr14	87461296	87462329
wt_h3k4me1.q.05_peak_102999	chr5	120331833	120332091
wt_h3k4me1.q.05_peak_58806	chr17	51049309	51049584
wt_h3k4me1.q.05_peak_27023	chr12	17747478	17748177
wt_h3k4me1.q.05_peak_43555	chr14	77767958	77768309
wt_h3k4me1.q.05_peak_105136	chr6	4945070	4945817
wt_h3k4me1.q.05_peak_5758	chr1	113797883	113798872
wt_h3k4me1.q.05_peak_24725	chr11	104263389	104263759
wt_h3k4me1.q.05_peak_133054	chr9	115737719	115738655
wt_h3k4me1.q.05_peak_11642	chr10	15366846	15367167
wt_h3k4me1.q.05_peak_55911	chr16	89805786	89806408
wt_h3k4me1.q.05_peak_26813	chr12	14235123	14235763
wt_h3k4me1.q.05_peak_47824	chr15	53305999	53306816
wt_h3k4me1.q.05_peak_61070	chr17	93597981	93598727
wt_h3k4me1.q.05_peak_68533	chr19	43748423	43749082
wt_h3k4me1.q.05_peak_5827	chr1	116792010	116792377
wt_h3k4me1.q.05_peak_37506	chr13	93886483	93887821
wt_h3k4me1.q.05_peak_87607	chr3	145762412	145762772
wt_h3k4me1.q.05_peak_43416	chr14	76655194	76656102
wt_h3k4me1.q.05_peak_130690	chr9	75096786	75097480
wt_h3k4me1.q.05_peak_62546	chr18	31189535	31190968
wt_h3k4me1.q.05_peak_68947	chr19	50670958	50671285
wt_h3k4me1.q.05_peak_16060	chr10	93176960	93177975
wt_h3k4me1.q.05_peak_6182	chr1	126120273	126121310
wt_h3k4me1.q.05_peak_40503	chr14	24951219	24951695
wt_h3k4me1.q.05_peak_20263	chr11	35663590	35664046
wt_h3k4me1.q.05_peak_3788	chr1	73045953	73046365
wt_h3k4me1.q.05_peak_52638	chr16	21432299	21432869
wt_h3k4me1.q.05_peak_42091	chr14	56918142	56919504
wt_h3k4me1.q.05_peak_89722	chr4	32386967	32389720
wt_h3k4me1.q.05_peak_5682	chr1	107764409	107765267
wt_h3k4me1.q.05_peak_21779	chr11	60842370	60842652
wt_h3k4me1.q.05_peak_81680	chr3	36449027	36449727
wt_h3k4me1.q.05_peak_47864	chr15	53760279	53760585
wt_h3k4me1.q.05_peak_100106	chr5	66810075	66810434
wt_h3k4me1.q.05_peak_4654	chr1	86823172	86823639
wt_h3k4me1.q.05_peak_92613	chr4	88200416	88200752
wt_h3k4me1.q.05_peak_78543	chr2	154410238	154410821
wt_h3k4me1.q.05_peak_120718	chr8	25304991	25305534
wt_h3k4me1.q.05_peak_88069	chr3	153937790	153938373
wt_h3k4me1.q.05_peak_89584	chr4	28861224	28863130
wt_h3k4me1.q.05_peak_16903	chr10	108238686	108239701
wt_h3k4me1.q.05_peak_9843	chr1	179853699	179854556
wt_h3k4me1.q.05_peak_30127	chr12	81208231	81209167
wt_h3k4me1.q.05_peak_91800	chr4	72800854	72801712
wt_h3k4me1.q.05_peak_35311	chr13	51357003	51357318
wt_h3k4me1.q.05_peak_40716	chr14	27831671	27833035
wt_h3k4me1.q.05_peak_62062	chr18	23420435	23421042
wt_h3k4me1.q.05_peak_80045	chr2	179307213	179307990
wt_h3k4me1.q.05_peak_5574	chr1	105999518	106000669
wt_h3k4me1.q.05_peak_57230	chr17	14479449	14479752
wt_h3k4me1.q.05_peak_119944	chr8	12800989	12803969
wt_h3k4me1.q.05_peak_18486	chr11	4157782	4158539
wt_h3k4me1.q.05_peak_110379	chr6	100842145	100842626
wt_h3k4me1.q.05_peak_123371	chr8	79449645	79450367
wt_h3k4me1.q.05_peak_128081	chr9	37012304	37012716
wt_h3k4me1.q.05_peak_93567	chr4	105479695	105480365
wt_h3k4me1.q.05_peak_91295	chr4	62633793	62634147
wt_h3k4me1.q.05_peak_36966	chr13	83120454	83120714
wt_h3k4me1.q.05_peak_55155	chr16	70119729	70120322
wt_h3k4me1.q.05_peak_33775	chr13	25723380	25723697
wt_h3k4me1.q.05_peak_113474	chr6	149092434	149092727
wt_h3k4me1.q.05_peak_33939	chr13	30067528	30067963
wt_h3k4me1.q.05_peak_60058	chr17	75543371	75544137
wt_h3k4me1.q.05_peak_50543	chr15	91013002	91013409
wt_h3k4me1.q.05_peak_42348	chr14	61362987	61363408
wt_h3k4me1.q.05_peak_41326	chr14	36896150	36896609
wt_h3k4me1.q.05_peak_81584	chr3	34470672	34471155
wt_h3k4me1.q.05_peak_91860	chr4	76057470	76058002
wt_h3k4me1.q.05_peak_87580	chr3	145348092	145348572
wt_h3k4me1.q.05_peak_130982	chr9	80076707	80077526
wt_h3k4me1.q.05_peak_128312	chr9	41287146	41287416
wt_h3k4me1.q.05_peak_38007	chr13	99542941	99543389
wt_h3k4me1.q.05_peak_100053	chr5	66417339	66418794
wt_h3k4me1.q.05_peak_18304	chr10	127828807	127829223
wt_h3k4me1.q.05_peak_99448	chr5	52316587	52317366
wt_h3k4me1.q.05_peak_17587	chr10	116770282	116772167
wt_h3k4me1.q.05_peak_24091	chr11	95833097	95834339
wt_h3k4me1.q.05_peak_31777	chr12	107844715	107845422
wt_h3k4me1.q.05_peak_52993	chr16	28165789	28166267
wt_h3k4me1.q.05_peak_95321	chr4	135266657	135267812
wt_h3k4me1.q.05_peak_18056	chr10	123419543	123419894
wt_h3k4me1.q.05_peak_64051	chr18	53976106	53976667
wt_h3k4me1.q.05_peak_10236	chr1	185836491	185837304
wt_h3k4me1.q.05_peak_45703	chr15	11986447	11990621
wt_h3k4me1.q.05_peak_103220	chr5	122741355	122742068
wt_h3k4me1.q.05_peak_126633	chr9	10771564	10771867
wt_h3k4me1.q.05_peak_2989	chr1	58958697	58959258
wt_h3k4me1.q.05_peak_94535	chr4	125232412	125232778
wt_h3k4me1.q.05_peak_68868	chr19	48343860	48344828
wt_h3k4me1.q.05_peak_131849	chr9	99038593	99038995
wt_h3k4me1.q.05_peak_73030	chr2	62940725	62941338
wt_h3k4me1.q.05_peak_99485	chr5	52799557	52801166
wt_h3k4me1.q.05_peak_70327	chr2	16395030	16395335
wt_h3k4me1.q.05_peak_4322	chr1	81254057	81255484
wt_h3k4me1.q.05_peak_37934	chr13	99037685	99038929
wt_h3k4me1.q.05_peak_81260	chr3	28587180	28588370
wt_h3k4me1.q.05_peak_14191	chr10	64735413	64735828
wt_h3k4me1.q.05_peak_84552	chr3	94499748	94500199
wt_h3k4me1.q.05_peak_5691	chr1	108046964	108047826
wt_h3k4me1.q.05_peak_91617	chr4	68870901	68871180
wt_h3k4me1.q.05_peak_125283	chr8	114259862	114260343
wt_h3k4me1.q.05_peak_96983	chr5	9269158	9270057
wt_h3k4me1.q.05_peak_86567	chr3	129071931	129072358
wt_h3k4me1.q.05_peak_34613	chr13	42777971	42778338
wt_h3k4me1.q.05_peak_120221	chr8	15328642	15328912
wt_h3k4me1.q.05_peak_107878	chr6	54830468	54831355
wt_h3k4me1.q.05_peak_101763	chr5	102328335	102329002
wt_h3k4me1.q.05_peak_92802	chr4	95023802	95024196
wt_h3k4me1.q.05_peak_120527	chr8	22614720	22615095
wt_h3k4me1.q.05_peak_74128	chr2	79226092	79226344
wt_h3k4me1.q.05_peak_81006	chr3	25567095	25568000
wt_h3k4me1.q.05_peak_86696	chr3	131471191	131471594
wt_h3k4me1.q.05_peak_17924	chr10	121873162	121873781
wt_h3k4me1.q.05_peak_74825	chr2	93740987	93741673
wt_h3k4me1.q.05_peak_13459	chr10	52274427	52275685
wt_h3k4me1.q.05_peak_96414	chr4	152361071	152361365
wt_h3k4me1.q.05_peak_135914	chrX	157861237	157861505
wt_h3k4me1.q.05_peak_110624	chr6	104553570	104554102
wt_h3k4me1.q.05_peak_120203	chr8	15016782	15017422
wt_h3k4me1.q.05_peak_131648	chr9	96412809	96413206
wt_h3k4me1.q.05_peak_2171	chr1	43543683	43544791
wt_h3k4me1.q.05_peak_90141	chr4	41550306	41550778
wt_h3k4me1.q.05_peak_5803	chr1	116040916	116041966
wt_h3k4me1.q.05_peak_85938	chr3	118063428	118064640
wt_h3k4me1.q.05_peak_119785	chr8	10568509	10568914
wt_h3k4me1.q.05_peak_25153	chr11	109270614	109271109
wt_h3k4me1.q.05_peak_53612	chr16	34997974	34998455
wt_h3k4me1.q.05_peak_7628	chr1	151824723	151825953
wt_h3k4me1.q.05_peak_50407	chr15	88702531	88703187
wt_h3k4me1.q.05_peak_91237	chr4	59676366	59676741
wt_h3k4me1.q.05_peak_118164	chr7	121711904	121712236
wt_h3k4me1.q.05_peak_123575	chr8	83920843	83921718
wt_h3k4me1.q.05_peak_92455	chr4	86353355	86353977
wt_h3k4me1.q.05_peak_131654	chr9	96501139	96501440
wt_h3k4me1.q.05_peak_54723	chr16	57266845	57268972
wt_h3k4me1.q.05_peak_109	chr1	5285658	5285925
wt_h3k4me1.q.05_peak_118407	chr7	125690897	125691172
wt_h3k4me1.q.05_peak_28107	chr12	40303906	40304305
wt_h3k4me1.q.05_peak_135939	chrX	158026210	158026804
wt_h3k4me1.q.05_peak_32672	chr13	5937298	5937820
wt_h3k4me1.q.05_peak_68514	chr19	43471490	43472540
wt_h3k4me1.q.05_peak_107996	chr6	56422853	56423239
wt_h3k4me1.q.05_peak_93924	chr4	111597020	111598592
wt_h3k4me1.q.05_peak_8241	chr1	158243462	158244562
wt_h3k4me1.q.05_peak_9373	chr1	172961932	172962300
wt_h3k4me1.q.05_peak_47116	chr15	38538321	38539559
wt_h3k4me1.q.05_peak_38509	chr13	107308971	107309470
wt_h3k4me1.q.05_peak_32528	chr12	118283556	118284569
wt_h3k4me1.q.05_peak_56042	chr16	91264371	91264709
wt_h3k4me1.q.05_peak_55415	chr16	76215403	76216574
wt_h3k4me1.q.05_peak_73131	chr2	65071997	65073362
wt_h3k4me1.q.05_peak_58940	chr17	55485510	55486921
wt_h3k4me1.q.05_peak_136095	chrX	161725795	161726670
wt_h3k4me1.q.05_peak_119644	chr8	9232900	9233982
wt_h3k4me1.q.05_peak_112726	chr6	137273517	137274006
wt_h3k4me1.q.05_peak_41266	chr14	35137786	35138513
wt_h3k4me1.q.05_peak_74104	chr2	78891286	78891606
wt_h3k4me1.q.05_peak_132241	chr9	104938189	104938671
wt_h3k4me1.q.05_peak_45807	chr15	12708210	12708598
wt_h3k4me1.q.05_peak_47822	chr15	53303024	53304004
wt_h3k4me1.q.05_peak_37046	chr13	84251542	84252469
wt_h3k4me1.q.05_peak_25920	chr11	118921719	118922095
wt_h3k4me1.q.05_peak_52391	chr16	17251344	17251837
wt_h3k4me1.q.05_peak_133623	chrX	5765709	5766062
wt_h3k4me1.q.05_peak_104163	chr5	136263208	136263486
wt_h3k4me1.q.05_peak_35761	chr13	56591316	56591598
wt_h3k4me1.q.05_peak_30788	chr12	89821628	89822368
wt_h3k4me1.q.05_peak_112818	chr6	138611901	138612295
wt_h3k4me1.q.05_peak_5752	chr1	113384810	113385294
wt_h3k4me1.q.05_peak_22848	chr11	76913964	76914556
wt_h3k4me1.q.05_peak_131183	chr9	85721134	85721582
wt_h3k4me1.q.05_peak_11859	chr10	19889726	19890714
wt_h3k4me1.q.05_peak_28285	chr12	44272842	44273343
wt_h3k4me1.q.05_peak_134843	chrX	84364849	84365394
wt_h3k4me1.q.05_peak_108736	chr6	76754301	76755459
wt_h3k4me1.q.05_peak_25540	chr11	115426218	115427365
wt_h3k4me1.q.05_peak_26385	chr12	5637411	5637889
wt_h3k4me1.q.05_peak_103361	chr5	124455175	124456148
wt_h3k4me1.q.05_peak_131827	chr9	98374688	98375934
wt_h3k4me1.q.05_peak_9212	chr1	170751373	170752344
wt_h3k4me1.q.05_peak_58379	chr17	45264837	45266189
wt_h3k4me1.q.05_peak_75887	chr2	113953619	113954301
wt_h3k4me1.q.05_peak_132106	chr9	103398500	103398918
wt_h3k4me1.q.05_peak_121917	chr8	48214745	48215936
wt_h3k4me1.q.05_peak_99057	chr5	44589899	44590274
wt_h3k4me1.q.05_peak_60193	chr17	79737890	79738276
wt_h3k4me1.q.05_peak_73875	chr2	75517169	75517671
wt_h3k4me1.q.05_peak_27151	chr12	25467544	25469578
wt_h3k4me1.q.05_peak_89046	chr4	14084154	14084763
wt_h3k4me1.q.05_peak_635	chr1	17717459	17719064
wt_h3k4me1.q.05_peak_25183	chr11	109667195	109667667
wt_h3k4me1.q.05_peak_13924	chr10	60193884	60194370
wt_h3k4me1.q.05_peak_41624	chr14	46461558	46463581
wt_h3k4me1.q.05_peak_21159	chr11	52105696	52106210
wt_h3k4me1.q.05_peak_35838	chr13	57651422	57653219
wt_h3k4me1.q.05_peak_134789	chrX	77608789	77609294
wt_h3k4me1.q.05_peak_134892	chrX	87347808	87349126
wt_h3k4me1.q.05_peak_81088	chr3	26638891	26639841
wt_h3k4me1.q.05_peak_57263	chr17	15204482	15205149
wt_h3k4me1.q.05_peak_7785	chr1	153277879	153278845
wt_h3k4me1.q.05_peak_118355	chr7	124242463	124242964
wt_h3k4me1.q.05_peak_10109	chr1	183138495	183139015
wt_h3k4me1.q.05_peak_98097	chr5	29792510	29793266
wt_h3k4me1.q.05_peak_66931	chr19	14314303	14314678
wt_h3k4me1.q.05_peak_18545	chr11	5000744	5001615
wt_h3k4me1.q.05_peak_47939	chr15	55040132	55040952
wt_h3k4me1.q.05_peak_31632	chr12	105340605	105341820
wt_h3k4me1.q.05_peak_89069	chr4	14819929	14820778
wt_h3k4me1.q.05_peak_20879	chr11	47315469	47315754
wt_h3k4me1.q.05_peak_132746	chr9	111772354	111773287
wt_h3k4me1.q.05_peak_65024	chr18	67542549	67542940
wt_h3k4me1.q.05_peak_95406	chr4	136919321	136919869
wt_h3k4me1.q.05_peak_29002	chr12	59238382	59239156
wt_h3k4me1.q.05_peak_1673	chr1	37515687	37516060
wt_h3k4me1.q.05_peak_23406	chr11	84126678	84127078
wt_h3k4me1.q.05_peak_25144	chr11	109083820	109085178
wt_h3k4me1.q.05_peak_120447	chr8	17713807	17714599
wt_h3k4me1.q.05_peak_129071	chr9	50024611	50025981
wt_h3k4me1.q.05_peak_131707	chr9	96986812	96987183
wt_h3k4me1.q.05_peak_78298	chr2	150578114	150578884
wt_h3k4me1.q.05_peak_32850	chr13	9447023	9447408
wt_h3k4me1.q.05_peak_111027	chr6	111400867	111401314
wt_h3k4me1.q.05_peak_108608	chr6	72240154	72240514
wt_h3k4me1.q.05_peak_77724	chr2	141556249	141557027
wt_h3k4me1.q.05_peak_74590	chr2	91386818	91387574
wt_h3k4me1.q.05_peak_28462	chr12	48439619	48440168
wt_h3k4me1.q.05_peak_70085	chr2	10986230	10986730
wt_h3k4me1.q.05_peak_70276	chr2	14806464	14807420
wt_h3k4me1.q.05_peak_24085	chr11	95736768	95737147
wt_h3k4me1.q.05_peak_90601	chr4	47870055	47870403
wt_h3k4me1.q.05_peak_76233	chr2	118909724	118910333
wt_h3k4me1.q.05_peak_3151	chr1	61179451	61181895
wt_h3k4me1.q.05_peak_26784	chr12	13609279	13609589
wt_h3k4me1.q.05_peak_90583	chr4	47592827	47594063
wt_h3k4me1.q.05_peak_13803	chr10	58928133	58928629
wt_h3k4me1.q.05_peak_11834	chr10	19153228	19153623
wt_h3k4me1.q.05_peak_43120	chr14	72259027	72259820
wt_h3k4me1.q.05_peak_38173	chr13	102036132	102036675
wt_h3k4me1.q.05_peak_88186	chr3	156595358	156596447
wt_h3k4me1.q.05_peak_458	chr1	14099743	14100054
wt_h3k4me1.q.05_peak_2174	chr1	43555501	43555857
wt_h3k4me1.q.05_peak_36242	chr13	64438621	64438882
wt_h3k4me1.q.05_peak_5740	chr1	112337465	112337878
wt_h3k4me1.q.05_peak_117258	chr7	101821363	101821681
wt_h3k4me1.q.05_peak_91015	chr4	56266013	56266280
wt_h3k4me1.q.05_peak_4211	chr1	79697412	79697987
wt_h3k4me1.q.05_peak_116094	chr7	81003965	81004660
wt_h3k4me1.q.05_peak_133892	chrX	13757561	13758670
wt_h3k4me1.q.05_peak_117395	chr7	109255448	109256092
wt_h3k4me1.q.05_peak_125637	chr8	120131038	120132008
wt_h3k4me1.q.05_peak_75942	chr2	114971969	114972329
wt_h3k4me1.q.05_peak_22954	chr11	78268086	78268431
wt_h3k4me1.q.05_peak_39932	chr14	17951819	17952216
wt_h3k4me1.q.05_peak_115633	chr7	73447247	73448627
wt_h3k4me1.q.05_peak_46607	chr15	31127507	31128297
wt_h3k4me1.q.05_peak_44523	chr14	106172398	106173252
wt_h3k4me1.q.05_peak_49802	chr15	81096279	81098798
wt_h3k4me1.q.05_peak_130154	chr9	65800014	65800460
wt_h3k4me1.q.05_peak_71516	chr2	33869966	33870271
wt_h3k4me1.q.05_peak_72720	chr2	58848112	58848935
wt_h3k4me1.q.05_peak_24842	chr11	105666491	105667397
wt_h3k4me1.q.05_peak_86795	chr3	133524374	133524906
wt_h3k4me1.q.05_peak_5354	chr1	97987792	97988662
wt_h3k4me1.q.05_peak_131738	chr9	97514284	97515204
wt_h3k4me1.q.05_peak_2752	chr1	55671224	55671566
wt_h3k4me1.q.05_peak_36766	chr13	77816049	77816838
wt_h3k4me1.q.05_peak_45607	chr15	10000675	10001261
wt_h3k4me1.q.05_peak_67206	chr19	20507184	20508028
wt_h3k4me1.q.05_peak_56143	chr16	92453687	92455534
wt_h3k4me1.q.05_peak_117625	chr7	112696966	112697874
wt_h3k4me1.q.05_peak_62416	chr18	27582597	27582969
wt_h3k4me1.q.05_peak_83222	chr3	68848390	68849203
wt_h3k4me1.q.05_peak_79725	chr2	170446100	170446439
wt_h3k4me1.q.05_peak_86709	chr3	131623273	131625279
wt_h3k4me1.q.05_peak_54422	chr16	49197873	49198623
wt_h3k4me1.q.05_peak_51743	chr16	6894236	6894609
wt_h3k4me1.q.05_peak_82539	chr3	55368204	55368950
wt_h3k4me1.q.05_peak_12627	chr10	32793216	32793539
wt_h3k4me1.q.05_peak_71714	chr2	37591351	37592441
wt_h3k4me1.q.05_peak_29066	chr12	61564275	61564861
wt_h3k4me1.q.05_peak_102465	chr5	113126833	113127272
wt_h3k4me1.q.05_peak_81877	chr3	39962809	39963726
wt_h3k4me1.q.05_peak_79326	chr2	165309497	165309925
wt_h3k4me1.q.05_peak_100851	chr5	81543950	81544568
wt_h3k4me1.q.05_peak_67663	chr19	27585562	27585846
wt_h3k4me1.q.05_peak_115728	chr7	74472001	74472887
wt_h3k4me1.q.05_peak_77674	chr2	140648661	140649018
wt_h3k4me1.q.05_peak_48908	chr15	70163302	70163706
wt_h3k4me1.q.05_peak_17963	chr10	122691080	122691926
wt_h3k4me1.q.05_peak_61916	chr18	21171156	21172839
wt_h3k4me1.q.05_peak_3447	chr1	65452024	65452597
wt_h3k4me1.q.05_peak_75258	chr2	102744897	102745759
wt_h3k4me1.q.05_peak_72479	chr2	52956977	52957378
wt_h3k4me1.q.05_peak_10235	chr1	185784955	185785305
wt_h3k4me1.q.05_peak_13331	chr10	45800291	45800665
wt_h3k4me1.q.05_peak_1368	chr1	33746829	33747392
wt_h3k4me1.q.05_peak_54161	chr16	43484360	43484612
wt_h3k4me1.q.05_peak_50671	chr15	92754385	92754980
wt_h3k4me1.q.05_peak_83768	chr3	80904530	80905644
wt_h3k4me1.q.05_peak_86011	chr3	119381223	119381548
wt_h3k4me1.q.05_peak_17968	chr10	122714035	122714508
wt_h3k4me1.q.05_peak_31425	chr12	102460032	102460497
wt_h3k4me1.q.05_peak_34869	chr13	44895281	44895875
wt_h3k4me1.q.05_peak_55537	chr16	77851798	77852521
wt_h3k4me1.q.05_peak_30103	chr12	80807802	80808432
wt_h3k4me1.q.05_peak_94148	chr4	118347922	118348288
wt_h3k4me1.q.05_peak_40786	chr14	28381587	28383231
wt_h3k4me1.q.05_peak_97446	chr5	20294366	20295197
wt_h3k4me1.q.05_peak_56426	chr16	96091428	96091983
wt_h3k4me1.q.05_peak_98333	chr5	33632026	33633032
wt_h3k4me1.q.05_peak_92523	chr4	87113496	87113794
wt_h3k4me1.q.05_peak_108787	chr6	77383644	77384059
wt_h3k4me1.q.05_peak_59106	chr17	59143244	59144156
wt_h3k4me1.q.05_peak_41008	chr14	31617415	31618273
wt_h3k4me1.q.05_peak_53435	chr16	33537551	33538223
wt_h3k4me1.q.05_peak_108160	chr6	60708767	60709163
wt_h3k4me1.q.05_peak_118167	chr7	121836803	121837117
wt_h3k4me1.q.05_peak_99101	chr5	44838406	44838787
wt_h3k4me1.q.05_peak_108647	chr6	72647548	72648237
wt_h3k4me1.q.05_peak_45317	chr14	124224071	124224355
wt_h3k4me1.q.05_peak_41776	chr14	48565071	48565354
wt_h3k4me1.q.05_peak_10834	chr1	194719596	194720190
wt_h3k4me1.q.05_peak_26825	chr12	14807927	14808541
wt_h3k4me1.q.05_peak_123324	chr8	78961121	78961801
wt_h3k4me1.q.05_peak_80105	chr2	179899530	179899782
wt_h3k4me1.q.05_peak_99708	chr5	57963565	57964908
wt_h3k4me1.q.05_peak_43371	chr14	76113792	76114144
wt_h3k4me1.q.05_peak_72886	chr2	61270757	61273785
wt_h3k4me1.q.05_peak_108478	chr6	69942746	69943519
wt_h3k4me1.q.05_peak_37197	chr13	90078452	90078994
wt_h3k4me1.q.05_peak_112179	chr6	127170692	127171385
wt_h3k4me1.q.05_peak_9535	chr1	175719755	175720328
wt_h3k4me1.q.05_peak_16058	chr10	93174442	93174823
wt_h3k4me1.q.05_peak_34584	chr13	42705527	42705868
wt_h3k4me1.q.05_peak_86	chr1	4934752	4935081
wt_h3k4me1.q.05_peak_79888	chr2	173443350	173444136
wt_h3k4me1.q.05_peak_79996	chr2	178454583	178455631
wt_h3k4me1.q.05_peak_110365	chr6	100581017	100582033
wt_h3k4me1.q.05_peak_112834	chr6	139249116	139249373
wt_h3k4me1.q.05_peak_42511	chr14	63735797	63736056
wt_h3k4me1.q.05_peak_110219	chr6	99136758	99137675
wt_h3k4me1.q.05_peak_52994	chr16	28186896	28187562
wt_h3k4me1.q.05_peak_76968	chr2	130926825	130927417
wt_h3k4me1.q.05_peak_6479	chr1	130995645	130995999
wt_h3k4me1.q.05_peak_130877	chr9	77969690	77971550
wt_h3k4me1.q.05_peak_125819	chr8	122037072	122037996
wt_h3k4me1.q.05_peak_27385	chr12	29061970	29063283
wt_h3k4me1.q.05_peak_132506	chr9	108123863	108124185
wt_h3k4me1.q.05_peak_91761	chr4	71539158	71539779
wt_h3k4me1.q.05_peak_81620	chr3	35146485	35146990
wt_h3k4me1.q.05_peak_42730	chr14	66199265	66200448
wt_h3k4me1.q.05_peak_102034	chr5	106773313	106774136
wt_h3k4me1.q.05_peak_61606	chr18	13350471	13350928
wt_h3k4me1.q.05_peak_12216	chr10	25378791	25379071
wt_h3k4me1.q.05_peak_108174	chr6	60787122	60790257
wt_h3k4me1.q.05_peak_40342	chr14	23664837	23665102
wt_h3k4me1.q.05_peak_21656	chr11	59437889	59438183
wt_h3k4me1.q.05_peak_41172	chr14	34444441	34445510
wt_h3k4me1.q.05_peak_68720	chr19	46563328	46563789
wt_h3k4me1.q.05_peak_12542	chr10	30733877	30734248
wt_h3k4me1.q.05_peak_27428	chr12	29551634	29552589
wt_h3k4me1.q.05_peak_43812	chr14	84744582	84745030
wt_h3k4me1.q.05_peak_75621	chr2	108821316	108821577
wt_h3k4me1.q.05_peak_20428	chr11	37773184	37773486
wt_h3k4me1.q.05_peak_28026	chr12	38555563	38556389
wt_h3k4me1.q.05_peak_88050	chr3	153652949	153654051
wt_h3k4me1.q.05_peak_122257	chr8	59031746	59032001
wt_h3k4me1.q.05_peak_75971	chr2	115671694	115672117
wt_h3k4me1.q.05_peak_79672	chr2	169126385	169126709
wt_h3k4me1.q.05_peak_24303	chr11	98464735	98465344
wt_h3k4me1.q.05_peak_77173	chr2	132927206	132927923
wt_h3k4me1.q.05_peak_94184	chr4	119241199	119242616
wt_h3k4me1.q.05_peak_128230	chr9	40452707	40452966
wt_h3k4me1.q.05_peak_16710	chr10	105469124	105469826
wt_h3k4me1.q.05_peak_134974	chrX	94793149	94793674
wt_h3k4me1.q.05_peak_48999	chr15	72199896	72200567
wt_h3k4me1.q.05_peak_37623	chr13	95213390	95213843
wt_h3k4me1.q.05_peak_102944	chr5	118699865	118702551
wt_h3k4me1.q.05_peak_77612	chr2	139376449	139377408
wt_h3k4me1.q.05_peak_46434	chr15	28279485	28279986
wt_h3k4me1.q.05_peak_121532	chr8	41023909	41024883
wt_h3k4me1.q.05_peak_32848	chr13	9429897	9431447
wt_h3k4me1.q.05_peak_108293	chr6	63946346	63947393
wt_h3k4me1.q.05_peak_99011	chr5	44158239	44159105
wt_h3k4me1.q.05_peak_26882	chr12	16185802	16186183
wt_h3k4me1.q.05_peak_40918	chr14	30336462	30336885
wt_h3k4me1.q.05_peak_61205	chr18	5817053	5817380
wt_h3k4me1.q.05_peak_92505	chr4	87045991	87046330
wt_h3k4me1.q.05_peak_80993	chr3	25405914	25406168
wt_h3k4me1.q.05_peak_765	chr1	21658417	21658791
wt_h3k4me1.q.05_peak_110697	chr6	106349855	106350503
wt_h3k4me1.q.05_peak_104164	chr5	136284858	136286177
wt_h3k4me1.q.05_peak_127062	chr9	22018966	22019327
wt_h3k4me1.q.05_peak_46264	chr15	26389566	26390268
wt_h3k4me1.q.05_peak_120454	chr8	18287752	18288241
wt_h3k4me1.q.05_peak_76561	chr2	124332746	124333528
wt_h3k4me1.q.05_peak_71792	chr2	38387796	38388103
wt_h3k4me1.q.05_peak_86046	chr3	120175785	120176105
wt_h3k4me1.q.05_peak_5715	chr1	110067406	110068690
wt_h3k4me1.q.05_peak_104506	chr5	142410615	142411362
wt_h3k4me1.q.05_peak_65737	chr18	77554105	77554472
wt_h3k4me1.q.05_peak_16609	chr10	101516710	101517065
wt_h3k4me1.q.05_peak_126697	chr9	13709431	13709980
wt_h3k4me1.q.05_peak_126015	chr8	124203849	124204131
wt_h3k4me1.q.05_peak_128471	chr9	42865099	42866228
wt_h3k4me1.q.05_peak_75639	chr2	109480412	109481151
wt_h3k4me1.q.05_peak_122070	chr8	54777093	54777855
wt_h3k4me1.q.05_peak_100575	chr5	74802029	74802961
wt_h3k4me1.q.05_peak_36562	chr13	73712507	73712820
wt_h3k4me1.q.05_peak_34639	chr13	42879383	42880666
wt_h3k4me1.q.05_peak_13620	chr10	54051840	54052188
wt_h3k4me1.q.05_peak_16729	chr10	105598350	105599186
wt_h3k4me1.q.05_peak_74962	chr2	96539569	96540141
wt_h3k4me1.q.05_peak_115926	chr7	78708910	78709504
wt_h3k4me1.q.05_peak_106456	chr6	32251485	32252484
wt_h3k4me1.q.05_peak_69766	chr2	6267726	6268417
wt_h3k4me1.q.05_peak_45253	chr14	122761761	122763038
wt_h3k4me1.q.05_peak_75894	chr2	114077790	114079871
wt_h3k4me1.q.05_peak_12682	chr10	34194565	34195160
wt_h3k4me1.q.05_peak_98564	chr5	36388636	36390432
wt_h3k4me1.q.05_peak_68385	chr19	41519039	41519373
wt_h3k4me1.q.05_peak_52173	chr16	12435052	12435825
wt_h3k4me1.q.05_peak_126621	chr9	10529373	10529781
wt_h3k4me1.q.05_peak_41486	chr14	39459824	39460436
wt_h3k4me1.q.05_peak_110944	chr6	109455710	109455979
wt_h3k4me1.q.05_peak_98736	chr5	38351003	38351429
wt_h3k4me1.q.05_peak_124093	chr8	91528837	91529096
wt_h3k4me1.q.05_peak_100422	chr5	73234979	73235334
wt_h3k4me1.q.05_peak_18313	chr10	128043160	128043420
wt_h3k4me1.q.05_peak_44385	chr14	103589609	103590119
wt_h3k4me1.q.05_peak_109798	chr6	92526053	92526357
wt_h3k4me1.q.05_peak_26807	chr12	14114856	14115490
wt_h3k4me1.q.05_peak_21805	chr11	61155741	61156426
wt_h3k4me1.q.05_peak_102585	chr5	114612526	114613369
wt_h3k4me1.q.05_peak_52646	chr16	21532830	21533695
wt_h3k4me1.q.05_peak_15692	chr10	87501021	87502663
wt_h3k4me1.q.05_peak_79716	chr2	170247787	170248200
wt_h3k4me1.q.05_peak_127383	chr9	27552454	27553068
wt_h3k4me1.q.05_peak_128498	chr9	43090391	43090997
wt_h3k4me1.q.05_peak_69391	chr19	58596335	58596593
wt_h3k4me1.q.05_peak_61590	chr18	12946520	12947157
wt_h3k4me1.q.05_peak_26346	chr12	5265508	5265951
wt_h3k4me1.q.05_peak_57161	chr17	12869750	12872894
wt_h3k4me1.q.05_peak_1326	chr1	32985527	32986123
wt_h3k4me1.q.05_peak_108770	chr6	77240234	77241028
wt_h3k4me1.q.05_peak_97921	chr5	25846580	25846868
wt_h3k4me1.q.05_peak_30114	chr12	80853389	80853981
wt_h3k4me1.q.05_peak_320	chr1	11638522	11638889
wt_h3k4me1.q.05_peak_45820	chr15	12793849	12794639
wt_h3k4me1.q.05_peak_109848	chr6	92924358	92924833
wt_h3k4me1.q.05_peak_37324	chr13	91996283	91997186
wt_h3k4me1.q.05_peak_15634	chr10	86513779	86514203
wt_h3k4me1.q.05_peak_28207	chr12	41457164	41457633
wt_h3k4me1.q.05_peak_18164	chr10	126436798	126437097
wt_h3k4me1.q.05_peak_17595	chr10	116848674	116849724
wt_h3k4me1.q.05_peak_43388	chr14	76464807	76466226
wt_h3k4me1.q.05_peak_120669	chr8	24404795	24405231
wt_h3k4me1.q.05_peak_9013	chr1	168272887	168273273
wt_h3k4me1.q.05_peak_69901	chr2	7019431	7020175
wt_h3k4me1.q.05_peak_118931	chr7	135184491	135185263
wt_h3k4me1.q.05_peak_90313	chr4	44843214	44844023
wt_h3k4me1.q.05_peak_62595	chr18	32216858	32217837
wt_h3k4me1.q.05_peak_6115	chr1	124584528	124585056
wt_h3k4me1.q.05_peak_76181	chr2	118353981	118355085
wt_h3k4me1.q.05_peak_125888	chr8	122926198	122926617
wt_h3k4me1.q.05_peak_102005	chr5	106061984	106062262
wt_h3k4me1.q.05_peak_8421	chr1	159842642	159843156
wt_h3k4me1.q.05_peak_103693	chr5	128869269	128869670
wt_h3k4me1.q.05_peak_68480	chr19	42570816	42571448
wt_h3k4me1.q.05_peak_81865	chr3	39769246	39769597
wt_h3k4me1.q.05_peak_122356	chr8	61321557	61322112
wt_h3k4me1.q.05_peak_70638	chr2	21417877	21418750
wt_h3k4me1.q.05_peak_25108	chr11	108751909	108752509
wt_h3k4me1.q.05_peak_6211	chr1	126479936	126480360
wt_h3k4me1.q.05_peak_107193	chr6	41576703	41576984
wt_h3k4me1.q.05_peak_52336	chr16	16547478	16547855
wt_h3k4me1.q.05_peak_133234	chr9	119655923	119656267
wt_h3k4me1.q.05_peak_55405	chr16	75762065	75762585
wt_h3k4me1.q.05_peak_105043	chr5	150301108	150301695
wt_h3k4me1.q.05_peak_82787	chr3	59016882	59017466
wt_h3k4me1.q.05_peak_23463	chr11	85199012	85199561
wt_h3k4me1.q.05_peak_91397	chr4	64142451	64143921
wt_h3k4me1.q.05_peak_39473	chr14	10487409	10487939
wt_h3k4me1.q.05_peak_6956	chr1	135518585	135519510
wt_h3k4me1.q.05_peak_59857	chr17	72158198	72158648
wt_h3k4me1.q.05_peak_99790	chr5	62742276	62744616
wt_h3k4me1.q.05_peak_63918	chr18	51112496	51112853
wt_h3k4me1.q.05_peak_102914	chr5	118566686	118568680
wt_h3k4me1.q.05_peak_122051	chr8	54524116	54524379
wt_h3k4me1.q.05_peak_79736	chr2	170585537	170586977
wt_h3k4me1.q.05_peak_4461	chr1	83685454	83685843
wt_h3k4me1.q.05_peak_52828	chr16	24368355	24368723
wt_h3k4me1.q.05_peak_56839	chr17	7212615	7212874
wt_h3k4me1.q.05_peak_4917	chr1	90210025	90210282
wt_h3k4me1.q.05_peak_1157	chr1	26463411	26463807
wt_h3k4me1.q.05_peak_87721	chr3	147211286	147211930
wt_h3k4me1.q.05_peak_132274	chr9	105436596	105437558
wt_h3k4me1.q.05_peak_38838	chr13	110943066	110943624
wt_h3k4me1.q.05_peak_89007	chr4	13789539	13790880
wt_h3k4me1.q.05_peak_45	chr1	3586846	3587724
wt_h3k4me1.q.05_peak_82991	chr3	64828212	64829006
wt_h3k4me1.q.05_peak_78965	chr2	160619851	160622128
wt_h3k4me1.q.05_peak_53078	chr16	29040673	29041805
wt_h3k4me1.q.05_peak_61228	chr18	6281728	6282176
wt_h3k4me1.q.05_peak_7266	chr1	139192417	139193210
wt_h3k4me1.q.05_peak_9815	chr1	179549379	179550142
wt_h3k4me1.q.05_peak_35116	chr13	47309321	47310222
wt_h3k4me1.q.05_peak_85395	chr3	107175870	107176166
wt_h3k4me1.q.05_peak_67669	chr19	27771016	27771298
wt_h3k4me1.q.05_peak_31588	chr12	104695913	104696209
wt_h3k4me1.q.05_peak_10710	chr1	193252374	193252913
wt_h3k4me1.q.05_peak_44907	chr14	119153927	119154263
wt_h3k4me1.q.05_peak_35292	chr13	51124400	51127489
wt_h3k4me1.q.05_peak_67152	chr19	18902935	18903282
wt_h3k4me1.q.05_peak_1536	chr1	36006799	36007383
wt_h3k4me1.q.05_peak_105343	chr6	8665100	8666148
wt_h3k4me1.q.05_peak_79298	chr2	165106657	165107192
wt_h3k4me1.q.05_peak_24119	chr11	96761787	96762453
wt_h3k4me1.q.05_peak_92022	chr4	78167536	78168725
wt_h3k4me1.q.05_peak_135861	chrX	155617159	155617515
wt_h3k4me1.q.05_peak_38742	chr13	109933590	109933850
wt_h3k4me1.q.05_peak_126470	chr9	5159632	5159960
wt_h3k4me1.q.05_peak_97361	chr5	19609879	19610638
wt_h3k4me1.q.05_peak_25311	chr11	112672498	112673014
wt_h3k4me1.q.05_peak_41307	chr14	36313181	36313941
wt_h3k4me1.q.05_peak_124010	chr8	90468768	90469608
wt_h3k4me1.q.05_peak_100062	chr5	66486241	66487061
wt_h3k4me1.q.05_peak_85585	chr3	108805443	108806044
wt_h3k4me1.q.05_peak_104794	chr5	147049170	147049478
wt_h3k4me1.q.05_peak_56168	chr16	93101413	93102741
wt_h3k4me1.q.05_peak_50289	chr15	86677252	86677833
wt_h3k4me1.q.05_peak_62008	chr18	22763236	22763530
wt_h3k4me1.q.05_peak_109625	chr6	90819426	90819874
wt_h3k4me1.q.05_peak_33967	chr13	30682004	30682802
wt_h3k4me1.q.05_peak_125328	chr8	115213935	115214758
wt_h3k4me1.q.05_peak_126686	chr9	13598023	13598412
wt_h3k4me1.q.05_peak_115745	chr7	74734982	74735317
wt_h3k4me1.q.05_peak_91987	chr4	77779836	77780235
wt_h3k4me1.q.05_peak_41052	chr14	32175435	32175750
wt_h3k4me1.q.05_peak_55644	chr16	81361979	81362295
wt_h3k4me1.q.05_peak_71871	chr2	40516413	40516688
wt_h3k4me1.q.05_peak_8102	chr1	156754841	156755141
wt_h3k4me1.q.05_peak_110028	chr6	95313190	95313598
wt_h3k4me1.q.05_peak_13441	chr10	51074433	51074716
wt_h3k4me1.q.05_peak_38153	chr13	101746041	101746938
wt_h3k4me1.q.05_peak_27568	chr12	30865929	30866640
wt_h3k4me1.q.05_peak_122036	chr8	54259261	54259571
wt_h3k4me1.q.05_peak_60915	chr17	90288191	90288554
wt_h3k4me1.q.05_peak_15157	chr10	78749335	78749681
wt_h3k4me1.q.05_peak_10504	chr1	191295774	191297009
wt_h3k4me1.q.05_peak_27381	chr12	28941093	28941514
wt_h3k4me1.q.05_peak_124026	chr8	90688840	90689331
wt_h3k4me1.q.05_peak_76729	chr2	127500432	127501616
wt_h3k4me1.q.05_peak_107370	chr6	46989102	46989492
wt_h3k4me1.q.05_peak_33032	chr13	11964368	11964641
wt_h3k4me1.q.05_peak_39514	chr14	11577394	11577851
wt_h3k4me1.q.05_peak_67629	chr19	27211033	27211357
wt_h3k4me1.q.05_peak_80698	chr3	17866518	17867112
wt_h3k4me1.q.05_peak_47270	chr15	40840180	40840465
wt_h3k4me1.q.05_peak_34213	chr13	35610977	35611436
wt_h3k4me1.q.05_peak_27222	chr12	26374400	26374690
wt_h3k4me1.q.05_peak_4875	chr1	89604532	89604947
wt_h3k4me1.q.05_peak_116176	chr7	82688846	82689440
wt_h3k4me1.q.05_peak_14442	chr10	69439427	69439913
wt_h3k4me1.q.05_peak_20887	chr11	47482557	47483218
wt_h3k4me1.q.05_peak_105223	chr6	6414726	6415657
wt_h3k4me1.q.05_peak_109153	chr6	84805723	84806299
wt_h3k4me1.q.05_peak_33279	chr13	17038351	17038613
wt_h3k4me1.q.05_peak_85730	chr3	115095189	115096334
wt_h3k4me1.q.05_peak_108908	chr6	80505837	80506840
wt_h3k4me1.q.05_peak_39840	chr14	16441837	16442621
wt_h3k4me1.q.05_peak_53910	chr16	39103586	39103983
wt_h3k4me1.q.05_peak_94339	chr4	120885702	120886097
wt_h3k4me1.q.05_peak_50360	chr15	87704698	87705415
wt_h3k4me1.q.05_peak_16829	chr10	107172299	107172789
wt_h3k4me1.q.05_peak_83443	chr3	75669584	75669966
wt_h3k4me1.q.05_peak_27801	chr12	33967753	33968260
wt_h3k4me1.q.05_peak_75294	chr2	103138359	103139607
wt_h3k4me1.q.05_peak_42506	chr14	63688247	63688662
wt_h3k4me1.q.05_peak_65168	chr18	68929381	68929883
wt_h3k4me1.q.05_peak_105822	chr6	21431239	21431621
wt_h3k4me1.q.05_peak_110343	chr6	100279305	100280437
wt_h3k4me1.q.05_peak_134900	chrX	87676758	87677056
wt_h3k4me1.q.05_peak_93998	chr4	115869652	115870146
wt_h3k4me1.q.05_peak_85365	chr3	107032889	107033520
wt_h3k4me1.q.05_peak_29942	chr12	78091681	78092413
wt_h3k4me1.q.05_peak_37547	chr13	94270260	94270678
wt_h3k4me1.q.05_peak_47173	chr15	39402228	39402497
wt_h3k4me1.q.05_peak_108631	chr6	72473308	72474357
wt_h3k4me1.q.05_peak_91576	chr4	68456565	68456925
wt_h3k4me1.q.05_peak_81659	chr3	36168575	36169258
wt_h3k4me1.q.05_peak_68269	chr19	38433965	38434297
wt_h3k4me1.q.05_peak_20329	chr11	36194278	36194542
wt_h3k4me1.q.05_peak_1306	chr1	32460583	32461453
wt_h3k4me1.q.05_peak_65633	chr18	76024223	76024643
wt_h3k4me1.q.05_peak_12269	chr10	25962912	25963392
wt_h3k4me1.q.05_peak_64388	chr18	59718925	59719341
wt_h3k4me1.q.05_peak_130403	chr9	69517371	69518332
wt_h3k4me1.q.05_peak_121363	chr8	36911166	36911485
wt_h3k4me1.q.05_peak_46722	chr15	32505805	32506481
wt_h3k4me1.q.05_peak_35815	chr13	57521153	57521716
wt_h3k4me1.q.05_peak_111565	chr6	116980713	116981454
wt_h3k4me1.q.05_peak_76217	chr2	118731464	118731811
wt_h3k4me1.q.05_peak_55154	chr16	70103615	70104238
wt_h3k4me1.q.05_peak_111822	chr6	120191691	120192152
wt_h3k4me1.q.05_peak_9895	chr1	180445310	180446056
wt_h3k4me1.q.05_peak_108215	chr6	61485504	61486168
wt_h3k4me1.q.05_peak_108898	chr6	80295415	80295997
wt_h3k4me1.q.05_peak_68601	chr19	45044401	45044859
wt_h3k4me1.q.05_peak_46697	chr15	32257387	32258592
wt_h3k4me1.q.05_peak_82366	chr3	53080596	53081305
wt_h3k4me1.q.05_peak_24980	chr11	107573377	107574209
wt_h3k4me1.q.05_peak_127804	chr9	32051433	32052078
wt_h3k4me1.q.05_peak_80104	chr2	179877389	179877922
wt_h3k4me1.q.05_peak_114262	chr7	37809653	37809955
wt_h3k4me1.q.05_peak_133158	chr9	118677553	118678066
wt_h3k4me1.q.05_peak_80547	chr3	11029459	11030459
wt_h3k4me1.q.05_peak_80765	chr3	19348543	19349774
wt_h3k4me1.q.05_peak_77	chr1	4869208	4869996
wt_h3k4me1.q.05_peak_62627	chr18	32546148	32546773
wt_h3k4me1.q.05_peak_22255	chr11	68533945	68534554
wt_h3k4me1.q.05_peak_100965	chr5	84634164	84634423
wt_h3k4me1.q.05_peak_4337	chr1	81863905	81865531
wt_h3k4me1.q.05_peak_83636	chr3	79858066	79858406
wt_h3k4me1.q.05_peak_135265	chrX	104237370	104238334
wt_h3k4me1.q.05_peak_65912	chr18	80138888	80139384
wt_h3k4me1.q.05_peak_135708	chrX	144162944	144163614
wt_h3k4me1.q.05_peak_59112	chr17	59280131	59280574
wt_h3k4me1.q.05_peak_61130	chr18	4559881	4560215
wt_h3k4me1.q.05_peak_46732	chr15	32611344	32611766
wt_h3k4me1.q.05_peak_42482	chr14	63442688	63443413
wt_h3k4me1.q.05_peak_76692	chr2	126681576	126683697
wt_h3k4me1.q.05_peak_57187	chr17	13717597	13717940
wt_h3k4me1.q.05_peak_1116	chr1	25716870	25717589
wt_h3k4me1.q.05_peak_124555	chr8	102571824	102572225
wt_h3k4me1.q.05_peak_32786	chr13	8749333	8749705
wt_h3k4me1.q.05_peak_51731	chr16	6785382	6786498
[truncated: 65,858 more rows]
