# Supplementary material for: MYT1L is required for suppressing earlier neuronal development programs in the adult mouse brain
Source: Genome Res. 2023 Apr;33(4):541–56. doi: 10.1101/gr.277413.122 (PMC10234307; doi:10.1101/gr.277413.122)
Supplement: Supplemental Material [file supp_gr.277413.122_Supplemental_Table_S4.xlsx]

## Sheet: PFC_Promoter_dDEG
Supplemental Table S4. Gene Ontology analysis on MYT1L Targets
Go description	Counts		Corrected p-value	Genes
cellular process	56/90 62.2%	6.4565e-07	DYRK3 MAST3 USP33 AP2A1 MED16 NAT14 HK1 SERP2 MC4R KCNT2 RNPEP RSPO2 HIST1H1E KAT7 FADS1 PRKCG EPHA7 RPS6KL1 SLC30A3 IMP3 FBXO2 PGAM1 DYRK1B MED26 GTPBP3 PEX7 FDX1 GARS ALPK1 MPND ISCU ZFP771 EXOC2 TOMM40 LAMA2 ADIPOR1 ABLIM2 U2AF2 CCDC85B PCBD2 VARS2 CCT4 JUN URGCP GCH1 NEK6 AZIN2 GGH MCOLN1 GRIN1 PPP5C EIF5 SLC25A39 GIPC1 DHCR7 PI4KB
cellular metabolic process	41/90 45.5%	1.6545e-06	DYRK3 MAST3 USP33 ADIPOR1 MED16 NAT14 HK1 MC4R U2AF2 CCDC85B RNPEP KAT7 PCBD2 VARS2 FADS1 CCT4 PRKCG EPHA7 JUN RPS6KL1 GCH1 IMP3 FBXO2 NEK6 PGAM1 DYRK1B AZIN2 GGH MED26 GTPBP3 PEX7 PPP5C EIF5 SLC25A39 FDX1 GARS PI4KB ALPK1 MPND ISCU ZFP771
metabolic process	43/90 47.7%	2.5551e-05	DYRK3 MAST3 USP33 CYP46A1 ADIPOR1 MED16 NAT14 HK1 MC4R U2AF2 CCDC85B RNPEP KAT7 PCBD2 VARS2 FADS1 CCT4 PRKCG EPHA7 JUN RPS6KL1 GCH1 IMP3 FBXO2 NEK6 PGAM1 DYRK1B AZIN2 GGH MED26 GTPBP3 PEX7 PPP5C EIF5 SLC25A39 FDX1 GARS DHCR7 PI4KB ALPK1 MPND ISCU ZFP771
primary metabolic process	37/90 41.1%	0.00031551	DYRK3 MAST3 USP33 CYP46A1 ADIPOR1 MED16 NAT14 HK1 U2AF2 CCDC85B RNPEP KAT7 VARS2 FADS1 CCT4 PRKCG EPHA7 JUN RPS6KL1 IMP3 FBXO2 NEK6 PGAM1 DYRK1B AZIN2 GGH MED26 GTPBP3 PEX7 PPP5C EIF5 GARS DHCR7 PI4KB ALPK1 MPND ZFP771
cellular protein metabolic process	17/90 18.8%	0.0022332	PRKCG EPHA7 DYRK3 RPS6KL1 MAST3 FBXO2 NEK6 USP33 DYRK1B HK1 PPP5C EIF5 GARS ALPK1 VARS2 MPND CCT4
oxoacid metabolic process	9/90 10.0%	0.0032127	PEX7 GCH1 RNPEP AZIN2 GGH GARS ADIPOR1 VARS2 FADS1
carboxylic acid metabolic process	9/90 10.0%	0.0032127	PEX7 GCH1 RNPEP AZIN2 GGH GARS ADIPOR1 VARS2 FADS1
organic acid metabolic process	9/90 10.0%	0.0032127	PEX7 GCH1 RNPEP AZIN2 GGH GARS ADIPOR1 VARS2 FADS1
cellular macromolecule metabolic process	27/90 30.0%	0.0032127	DYRK3 MAST3 USP33 MED16 NAT14 HK1 U2AF2 CCDC85B KAT7 VARS2 CCT4 PRKCG EPHA7 JUN RPS6KL1 IMP3 FBXO2 NEK6 DYRK1B MED26 GTPBP3 PPP5C EIF5 GARS ALPK1 MPND ZFP771
cellular ketone metabolic process	9/90 10.0%	0.0034328	PEX7 GCH1 RNPEP AZIN2 GGH GARS ADIPOR1 VARS2 FADS1
protein metabolic process	18/90 20.0%	0.0065427	PRKCG EPHA7 DYRK3 RPS6KL1 MAST3 FBXO2 NEK6 USP33 DYRK1B HK1 PPP5C EIF5 RNPEP GARS ALPK1 VARS2 MPND CCT4
macromolecule metabolic process	28/90 31.1%	0.007435	DYRK3 MAST3 USP33 MED16 NAT14 HK1 U2AF2 CCDC85B RNPEP KAT7 VARS2 CCT4 PRKCG EPHA7 JUN RPS6KL1 IMP3 FBXO2 NEK6 DYRK1B MED26 GTPBP3 PPP5C EIF5 GARS ALPK1 MPND ZFP771
tetrahydrobiopterin biosynthetic process	2/90 2.2%	0.0080755	GCH1 PCBD2
protein amino acid phosphorylation	9/90 10.0%	0.0080755	PRKCG EPHA7 DYRK3 RPS6KL1 MAST3 NEK6 DYRK1B ALPK1 HK1
phosphorylation	10/90 11.1%	0.0080755	PRKCG EPHA7 DYRK3 RPS6KL1 MAST3 NEK6 DYRK1B PI4KB ALPK1 HK1
phosphorus metabolic process	11/90 12.2%	0.0090827	PRKCG EPHA7 PPP5C DYRK3 RPS6KL1 MAST3 NEK6 DYRK1B PI4KB ALPK1 HK1
phosphate metabolic process	11/90 12.2%	0.0090827	PRKCG EPHA7 PPP5C DYRK3 RPS6KL1 MAST3 NEK6 DYRK1B PI4KB ALPK1 HK1
transport	18/90 20.0%	0.009493	SYT3 LRSAM1 TOMM40 SLC30A3 USP33 AP2A1 MCOLN1 GRIN1 SERP2 MC4R PEX7 SLC25A39 KCNT2 GIPC1 FDX1 GARS FADS1 EXOC2
response to morphine	2/90 2.2%	0.009493	PPP5C GRIN1
tetrahydrobiopterin metabolic process	2/90 2.2%	0.009493	GCH1 PCBD2
chemosensory behavior	2/90 2.2%	0.009493	PRKCG GRIN1
response to isoquinoline alkaloid	2/90 2.2%	0.009493	PPP5C GRIN1
small molecule metabolic process	13/90 14.4%	0.009493	GCH1 PGAM1 AZIN2 GGH CYP46A1 ADIPOR1 HK1 PEX7 RNPEP GARS DHCR7 VARS2 FADS1
post-translational protein modification	11/90 12.2%	0.009493	PRKCG EPHA7 PPP5C DYRK3 RPS6KL1 MAST3 FBXO2 NEK6 DYRK1B ALPK1 HK1
establishment of localization	18/90 20.0%	0.009493	SYT3 LRSAM1 TOMM40 SLC30A3 USP33 AP2A1 MCOLN1 GRIN1 SERP2 MC4R PEX7 SLC25A39 KCNT2 GIPC1 FDX1 GARS FADS1 EXOC2
regulation of neuron apoptosis	4/90 4.4%	0.012901	EPHA7 JUN AKT1S1 GRIN1
macromolecule modification	12/90 13.3%	0.014782	PRKCG EPHA7 PPP5C DYRK3 RPS6KL1 MAST3 FBXO2 NEK6 DYRK1B ALPK1 GTPBP3 HK1
establishment of localization in cell	8/90 8.8%	0.016745	MC4R PEX7 TOMM40 GIPC1 AP2A1 GARS MCOLN1 EXOC2
response to zinc ion	2/90 2.2%	0.017623	SLC30A3 GGH
heterocycle biosynthetic process	3/90 3.3%	0.017706	SLC25A39 GCH1 PCBD2
pteridine and derivative biosynthetic process	2/90 2.2%	0.026069	GCH1 PCBD2
cellular localization	8/90 8.8%	0.026608	MC4R PEX7 TOMM40 GIPC1 AP2A1 GARS MCOLN1 EXOC2
protein modification process	11/90 12.2%	0.028959	PRKCG EPHA7 PPP5C DYRK3 RPS6KL1 MAST3 FBXO2 NEK6 DYRK1B ALPK1 HK1
generation of precursor metabolites and energy	5/90 5.5%	0.028959	MC4R PGAM1 FDX1 FADS1 HK1
localization	18/90 20.0%	0.028959	SYT3 LRSAM1 TOMM40 SLC30A3 USP33 AP2A1 MCOLN1 GRIN1 SERP2 MC4R PEX7 SLC25A39 KCNT2 GIPC1 FDX1 GARS FADS1 EXOC2
aromatic compound biosynthetic process	2/90 2.2%	0.028959	GCH1 PCBD2
lipid modification	3/90 3.3%	0.029323	PEX7 PI4KB ADIPOR1
regulation of metabolic process	19/90 21.1%	0.032658	JUN NDFIP1 IMP3 FBXO2 MED16 NAT14 MED26 GRIN1 MC4R EIF5 ABLIM2 CCDC85B GIPC1 AKT1S1 TERF2IP KAT7 DHCR7 SCAND1 ZFP771
positive regulation of biological process	14/90 15.5%	0.036057	EPHA7 JUN NDFIP1 LAMA2 ADIPOR1 GRIN1 MC4R EIF5 ABLIM2 GIPC1 RSPO2 RELL2 SCAND1 EXOC2
regulation of macromolecule metabolic process	17/90 18.8%	0.038185	JUN NDFIP1 IMP3 FBXO2 MED16 NAT14 MED26 GRIN1 EIF5 ABLIM2 CCDC85B GIPC1 AKT1S1 TERF2IP KAT7 SCAND1 ZFP771
protein heterooligomerization	3/90 3.3%	0.039057	PPP5C GCH1 PCBD2
biosynthetic process	18/90 20.0%	0.04054	JUN GCH1 AZIN2 MED16 NAT14 MED26 EIF5 SLC25A39 CCDC85B RNPEP KAT7 GARS DHCR7 PCBD2 VARS2 FADS1 ISCU ZFP771
regulation of protein metabolic process	6/90 6.6%	0.041456	JUN NDFIP1 EIF5 IMP3 FBXO2 GIPC1
pteridine and derivative metabolic process	2/90 2.2%	0.042951	GCH1 PCBD2
monocarboxylic acid metabolic process	5/90 5.5%	0.042951	PEX7 GCH1 RNPEP ADIPOR1 FADS1
cellular amino acid metabolic process	4/90 4.4%	0.045099	AZIN2 GGH GARS VARS2
ncRNA metabolic process	4/90 4.4%	0.045099	IMP3 GARS VARS2 GTPBP3
regulation of primary metabolic process	17/90 18.8%	0.045099	JUN NDFIP1 IMP3 FBXO2 MED16 NAT14 MED26 GRIN1 EIF5 ABLIM2 CCDC85B GIPC1 TERF2IP KAT7 DHCR7 SCAND1 ZFP771
cofactor biosynthetic process	3/90 3.3%	0.045099	SLC25A39 GCH1 ISCU
cellular component organization	14/90 15.5%	0.045099	EPHA7 JUN TOMM40 GCH1 NEK6 USP33 AP2A1 GRIN1 PEX7 PPP5C ABLIM2 HIST1H1E KAT7 PCBD2
RNA metabolic process	7/90 7.7%	0.045099	JUN IMP3 U2AF2 GARS VARS2 MED16 GTPBP3
detoxification of zinc ion	1/90 1.1%	0.045099	SLC30A3
regulation of anion channel activity	1/90 1.1%	0.045099	HK1
leading edge cell differentiation	1/90 1.1%	0.045099	JUN
valyl-tRNA aminoacylation	1/90 1.1%	0.045099	VARS2
pons maturation	1/90 1.1%	0.045099	GRIN1
dihydrobiopterin metabolic process	1/90 1.1%	0.045099	GCH1
regulation of gene expression	15/90 16.6%	0.049365	JUN IMP3 MED16 NAT14 MED26 GRIN1 EIF5 ABLIM2 CCDC85B GIPC1 AKT1S1 TERF2IP KAT7 SCAND1 ZFP771
fatty acid metabolic process	4/90 4.4%	0.049365	PEX7 RNPEP ADIPOR1 FADS1
cellular biosynthetic process	17/90 18.8%	0.049365	JUN GCH1 AZIN2 MED16 NAT14 MED26 EIF5 SLC25A39 CCDC85B RNPEP KAT7 GARS PCBD2 VARS2 FADS1 ISCU ZFP771

## Sheet: PFC_Promoter_uDEG
Go description	Counts	Corrected p-value	Genes
regulation of cellular metabolic process	29/74 39.1%	5.9088e-09	HDAC4 BTG2 CTNND2 TSHZ1 BHLHE41 FOXK2 NLK PHF21A SPRED2 MBIP RUNX1T1 PAIP1 TBC1D8B MED1 SRRM4 CREBBP BCL11B MGA SOX11 MITF FOS BAZ1B NR4A1 PER3 NR4A3 AGO3 DDIT3 TAOK1 CDK5R1
regulation of metabolic process	29/74 39.1%	1.4418e-08	HDAC4 BTG2 CTNND2 TSHZ1 BHLHE41 FOXK2 NLK PHF21A SPRED2 MBIP RUNX1T1 PAIP1 TBC1D8B MED1 SRRM4 CREBBP BCL11B MGA SOX11 MITF FOS BAZ1B NR4A1 PER3 NR4A3 AGO3 DDIT3 TAOK1 CDK5R1
regulation of RNA metabolic process	19/74 25.6%	3.1689e-08	HDAC4 MED1 SRRM4 CREBBP BCL11B TSHZ1 MGA BHLHE41 FOXK2 SOX11 MITF FOS BAZ1B PHF21A NR4A1 PER3 NR4A3 DDIT3 RUNX1T1
transcription	21/74 28.3%	3.5202e-08	HDAC4 MED1 BTG2 CREBBP BCL11B CTNND2 TSHZ1 MGA BHLHE41 FOXK2 SOX11 MITF FOS BAZ1B NLK PHF21A NR4A1 PER3 NR4A3 DDIT3 RUNX1T1
regulation of primary metabolic process	26/74 35.1%	7.7035e-08	HDAC4 BTG2 CTNND2 TSHZ1 BHLHE41 FOXK2 NLK PHF21A MBIP RUNX1T1 PAIP1 TBC1D8B MED1 SRRM4 CREBBP BCL11B MGA SOX11 MITF FOS BAZ1B NR4A1 PER3 NR4A3 AGO3 DDIT3
regulation of gene expression	24/74 32.4%	7.7035e-08	HDAC4 MED1 BTG2 SRRM4 CREBBP BCL11B CTNND2 TSHZ1 MGA BHLHE41 FOXK2 SOX11 MITF FOS BAZ1B NLK PHF21A NR4A1 PER3 NR4A3 AGO3 DDIT3 RUNX1T1 PAIP1
regulation of transcription, DNA-dependent	18/74 24.3%	8.292e-08	HDAC4 MED1 CREBBP BCL11B TSHZ1 MGA BHLHE41 FOXK2 SOX11 MITF FOS BAZ1B PHF21A NR4A1 PER3 NR4A3 DDIT3 RUNX1T1
regulation of macromolecule metabolic process	25/74 33.7%	1.261e-07	HDAC4 BTG2 CTNND2 TSHZ1 BHLHE41 FOXK2 NLK PHF21A MBIP RUNX1T1 PAIP1 MED1 SRRM4 CREBBP BCL11B MGA SOX11 MITF FOS BAZ1B NR4A1 PER3 NR4A3 AGO3 DDIT3
cellular macromolecule metabolic process	31/74 41.8%	1.261e-07	HDAC4 BTG2 BTG1 FKBP14 LRRK2 CTNND2 TSHZ1 BHLHE41 FOXK2 NLK PHF21A MBIP RUNX1T1 PAIP1 MED1 SRRM4 CREBBP CDKL5 BCL11B MGA SOX11 MITF FOS BAZ1B CIT NR4A1 PER3 NR4A3 DDIT3 TAOK1 CDK5R1
regulation of macromolecule biosynthetic process	23/74 31.0%	1.5519e-07	HDAC4 MED1 BTG2 CREBBP BCL11B CTNND2 TSHZ1 MGA BHLHE41 FOXK2 SOX11 MITF FOS BAZ1B NLK PHF21A NR4A1 PER3 NR4A3 AGO3 DDIT3 RUNX1T1 PAIP1
regulation of nucleobase, nucleoside, nucleotide and nucleic acid metabolic process	23/74 31.0%	2.2982e-07	HDAC4 TBC1D8B MED1 BTG2 SRRM4 CREBBP BCL11B CTNND2 TSHZ1 MGA BHLHE41 FOXK2 SOX11 MITF FOS BAZ1B NLK PHF21A NR4A1 PER3 NR4A3 DDIT3 RUNX1T1
cellular metabolic process	36/74 48.6%	2.2982e-07	HDAC4 BTG2 BTG1 FKBP14 LRRK2 CTNND2 TSHZ1 PTPRO BHLHE41 FOXK2 NLK PITPNC1 PHF21A MBIP RUNX1T1 PAIP1 MED1 SRRM4 CREBBP CDKL5 BCL11B MGA SOX11 MITF ELOVL6 FOS BAZ1B PRKAB1 CIT NR4A1 PER3 NR4A3 DDIT3 TAOK1 CHST2 CDK5R1
regulation of nitrogen compound metabolic process	23/74 31.0%	2.5147e-07	HDAC4 TBC1D8B MED1 BTG2 SRRM4 CREBBP BCL11B CTNND2 TSHZ1 MGA BHLHE41 FOXK2 SOX11 MITF FOS BAZ1B NLK PHF21A NR4A1 PER3 NR4A3 DDIT3 RUNX1T1
regulation of cellular biosynthetic process	23/74 31.0%	2.9049e-07	HDAC4 MED1 BTG2 CREBBP BCL11B CTNND2 TSHZ1 MGA BHLHE41 FOXK2 SOX11 MITF FOS BAZ1B NLK PHF21A NR4A1 PER3 NR4A3 AGO3 DDIT3 RUNX1T1 PAIP1
regulation of biosynthetic process	23/74 31.0%	3.0976e-07	HDAC4 MED1 BTG2 CREBBP BCL11B CTNND2 TSHZ1 MGA BHLHE41 FOXK2 SOX11 MITF FOS BAZ1B NLK PHF21A NR4A1 PER3 NR4A3 AGO3 DDIT3 RUNX1T1 PAIP1
macromolecule metabolic process	32/74 43.2%	3.0976e-07	HDAC4 BTG2 BTG1 FKBP14 LRRK2 CTNND2 TSHZ1 BHLHE41 FOXK2 NLK PHF21A DDI2 MBIP RUNX1T1 PAIP1 MED1 SRRM4 CREBBP CDKL5 BCL11B MGA SOX11 MITF FOS BAZ1B CIT NR4A1 PER3 NR4A3 DDIT3 TAOK1 CDK5R1
nucleic acid metabolic process	23/74 31.0%	3.3005e-07	HDAC4 MED1 BTG2 SRRM4 CREBBP BCL11B CTNND2 TSHZ1 MGA BHLHE41 FOXK2 SOX11 MITF FOS BAZ1B NLK PHF21A NR4A1 PER3 NR4A3 DDIT3 RUNX1T1 PAIP1
primary metabolic process	36/74 48.6%	4.5538e-07	HDAC4 BTG2 BTG1 FKBP14 LRRK2 CTNND2 TSHZ1 BHLHE41 FOXK2 NLK PITPNC1 PHF21A DDI2 MBIP RUNX1T1 PAIP1 MED1 SRRM4 CREBBP CDKL5 BCL11B MGA SOX11 MITF ELOVL6 FOS BAZ1B PRKAB1 CIT NR4A1 PER3 NR4A3 DDIT3 TAOK1 CHST2 CDK5R1
regulation of transcription	21/74 28.3%	5.0893e-07	HDAC4 MED1 BTG2 CREBBP BCL11B CTNND2 TSHZ1 MGA BHLHE41 FOXK2 SOX11 MITF FOS BAZ1B NLK PHF21A NR4A1 PER3 NR4A3 DDIT3 RUNX1T1
positive regulation of cellular metabolic process	14/74 18.9%	9.0449e-07	HDAC4 MED1 CREBBP BCL11B SOX11 MITF FOS BAZ1B NR4A1 NR4A3 DDIT3 TAOK1 MBIP CDK5R1
gene expression	22/74 29.7%	1.0417e-06	HDAC4 MED1 BTG2 SRRM4 CREBBP BCL11B CTNND2 TSHZ1 MGA BHLHE41 FOXK2 SOX11 MITF FOS BAZ1B NLK PHF21A NR4A1 PER3 NR4A3 DDIT3 RUNX1T1
cellular macromolecule biosynthetic process	21/74 28.3%	1.2084e-06	HDAC4 MED1 BTG2 CREBBP BCL11B CTNND2 TSHZ1 MGA BHLHE41 FOXK2 SOX11 MITF FOS BAZ1B NLK PHF21A NR4A1 PER3 NR4A3 DDIT3 RUNX1T1
macromolecule biosynthetic process	21/74 28.3%	1.2543e-06	HDAC4 MED1 BTG2 CREBBP BCL11B CTNND2 TSHZ1 MGA BHLHE41 FOXK2 SOX11 MITF FOS BAZ1B NLK PHF21A NR4A1 PER3 NR4A3 DDIT3 RUNX1T1
positive regulation of metabolic process	14/74 18.9%	1.9158e-06	HDAC4 MED1 CREBBP BCL11B SOX11 MITF FOS BAZ1B NR4A1 NR4A3 DDIT3 TAOK1 MBIP CDK5R1
cellular biosynthetic process	23/74 31.0%	3.5644e-06	HDAC4 MED1 BTG2 CREBBP BCL11B CTNND2 TSHZ1 MGA BHLHE41 FOXK2 SOX11 MITF ELOVL6 FOS BAZ1B NLK PRKAB1 PHF21A NR4A1 PER3 NR4A3 DDIT3 RUNX1T1
regulation of transcription from RNA polymerase II promoter	12/74 16.2%	3.5644e-06	HDAC4 MED1 NR4A1 CREBBP PER3 NR4A3 BCL11B BHLHE41 SOX11 MITF FOS PHF21A
nucleobase, nucleoside, nucleotide and nucleic acid metabolic process	23/74 31.0%	3.947e-06	HDAC4 MED1 BTG2 SRRM4 CREBBP BCL11B CTNND2 TSHZ1 MGA BHLHE41 FOXK2 SOX11 MITF FOS BAZ1B NLK PHF21A NR4A1 PER3 NR4A3 DDIT3 RUNX1T1 PAIP1
metabolic process	37/74 50.0%	4.1697e-06	HDAC4 BTG2 BTG1 FKBP14 LRRK2 CTNND2 TSHZ1 PTPRO BHLHE41 FOXK2 NLK PITPNC1 PHF21A DDI2 MBIP RUNX1T1 PAIP1 MED1 SRRM4 CREBBP CDKL5 BCL11B MGA SOX11 MITF ELOVL6 FOS BAZ1B PRKAB1 CIT NR4A1 PER3 NR4A3 DDIT3 TAOK1 CHST2 CDK5R1
biosynthetic process	23/74 31.0%	5.705e-06	HDAC4 MED1 BTG2 CREBBP BCL11B CTNND2 TSHZ1 MGA BHLHE41 FOXK2 SOX11 MITF ELOVL6 FOS BAZ1B NLK PRKAB1 PHF21A NR4A1 PER3 NR4A3 DDIT3 RUNX1T1
positive regulation of transcription	11/74 14.8%	6.8555e-06	HDAC4 MED1 NR4A1 CREBBP NR4A3 BCL11B DDIT3 SOX11 MITF FOS BAZ1B
positive regulation of transcription, DNA-dependent	10/74 13.5%	7.7974e-06	HDAC4 MED1 NR4A1 CREBBP NR4A3 BCL11B SOX11 MITF FOS BAZ1B
positive regulation of RNA metabolic process	10/74 13.5%	8.0039e-06	HDAC4 MED1 NR4A1 CREBBP NR4A3 BCL11B SOX11 MITF FOS BAZ1B
regulation of cellular process	36/74 48.6%	8.3473e-06	HDAC4 BTG2 BTG1 LRRK2 CTNND2 TSHZ1 BHLHE41 FOXK2 NLK PHF21A SPRED2 MBIP RUNX1T1 PAIP1 TBC1D8B MED1 LINGO1 SRRM4 CREBBP BCL11B KCNB1 MGA PPP2R5A SOX11 MITF FOS BAZ1B CIT NR4A1 PER3 NR4A3 AGO3 DDIT3 TAOK1 MAD2L1 CDK5R1
negative regulation of biological process	17/74 22.9%	1.0901e-05	HDAC4 LINGO1 BTG2 CREBBP BTG1 BCL11B BHLHE41 MITF NLK PHF21A CIT PER3 AGO3 DDIT3 MBIP RUNX1T1 MAD2L1
positive regulation of gene expression	11/74 14.8%	1.0901e-05	HDAC4 MED1 NR4A1 CREBBP NR4A3 BCL11B DDIT3 SOX11 MITF FOS BAZ1B
negative regulation of cellular process	16/74 21.6%	1.1089e-05	HDAC4 LINGO1 BTG2 CREBBP BTG1 BCL11B BHLHE41 MITF NLK PHF21A CIT PER3 DDIT3 MBIP RUNX1T1 MAD2L1
cellular nitrogen compound metabolic process	23/74 31.0%	1.2038e-05	HDAC4 MED1 BTG2 SRRM4 CREBBP BCL11B CTNND2 TSHZ1 MGA BHLHE41 FOXK2 SOX11 MITF FOS BAZ1B NLK PHF21A NR4A1 PER3 NR4A3 DDIT3 RUNX1T1 PAIP1
biological regulation	38/74 51.3%	1.2038e-05	HDAC4 BTG2 BTG1 LRRK2 CTNND2 TSHZ1 BHLHE41 FOXK2 NLK PHF21A SPRED2 MBIP RUNX1T1 PAIP1 TBC1D8B MED1 LINGO1 SRRM4 CREBBP BCL11B KCNB1 MGA PPP2R5A SOX11 MITF FOS BAZ1B PRKAB1 CIT NR4A1 PER3 NR4A3 AGO3 DDIT3 TAOK1 DCX MAD2L1 CDK5R1
positive regulation of nucleobase, nucleoside, nucleotide and nucleic acid metabolic process	11/74 14.8%	1.2723e-05	HDAC4 MED1 NR4A1 CREBBP NR4A3 BCL11B DDIT3 SOX11 MITF FOS BAZ1B
positive regulation of nitrogen compound metabolic process	11/74 14.8%	1.6979e-05	HDAC4 MED1 NR4A1 CREBBP NR4A3 BCL11B DDIT3 SOX11 MITF FOS BAZ1B
positive regulation of macromolecule biosynthetic process	11/74 14.8%	1.7057e-05	HDAC4 MED1 NR4A1 CREBBP NR4A3 BCL11B DDIT3 SOX11 MITF FOS BAZ1B
positive regulation of macromolecule metabolic process	12/74 16.2%	1.7305e-05	HDAC4 MED1 NR4A1 CREBBP NR4A3 BCL11B DDIT3 MBIP SOX11 MITF FOS BAZ1B
nitrogen compound metabolic process	23/74 31.0%	1.7305e-05	HDAC4 MED1 BTG2 SRRM4 CREBBP BCL11B CTNND2 TSHZ1 MGA BHLHE41 FOXK2 SOX11 MITF FOS BAZ1B NLK PHF21A NR4A1 PER3 NR4A3 DDIT3 RUNX1T1 PAIP1
cellular process	43/74 58.1%	1.7305e-05	HDAC4 BTG2 BTG1 FKBP14 LRRK2 CTNND2 TSHZ1 PTPRO BHLHE41 FOXK2 NLK PITPNC1 PHF21A MBIP HMGN3 RAB11FIP3 RUNX1T1 PAIP1 MED1 LINGO1 SRRM4 CREBBP CDKL5 BCL11B MGA SOX11 MITF ELOVL6 FOS BAZ1B PRKAB1 CIT NR4A1 BIN3 PER3 NR4A3 AGO3 DDIT3 TAOK1 DCX CHST2 MAD2L1 CDK5R1
positive regulation of transcription from RNA polymerase II promoter	9/74 12.1%	1.7911e-05	HDAC4 MED1 NR4A1 CREBBP NR4A3 BCL11B SOX11 MITF FOS
regulation of biological process	36/74 48.6%	2.1329e-05	HDAC4 BTG2 BTG1 LRRK2 CTNND2 TSHZ1 BHLHE41 FOXK2 NLK PHF21A SPRED2 MBIP RUNX1T1 PAIP1 TBC1D8B MED1 LINGO1 SRRM4 CREBBP BCL11B KCNB1 MGA PPP2R5A SOX11 MITF FOS BAZ1B CIT NR4A1 PER3 NR4A3 AGO3 DDIT3 TAOK1 MAD2L1 CDK5R1
positive regulation of cellular biosynthetic process	11/74 14.8%	2.5838e-05	HDAC4 MED1 NR4A1 CREBBP NR4A3 BCL11B DDIT3 SOX11 MITF FOS BAZ1B
positive regulation of biosynthetic process	11/74 14.8%	2.9374e-05	HDAC4 MED1 NR4A1 CREBBP NR4A3 BCL11B DDIT3 SOX11 MITF FOS BAZ1B
regulation of molecular function	11/74 14.8%	0.00018408	TBC1D8B SPRED2 NR4A1 CREBBP BTG1 DDIT3 TAOK1 MBIP PRKAB1 RUNX1T1 CDK5R1
positive regulation of cellular process	15/74 20.2%	0.00019964	HDAC4 MED1 CREBBP BTG1 BCL11B SOX11 MITF FOS BAZ1B NR4A1 NR4A3 DDIT3 TAOK1 MBIP CDK5R1
positive regulation of biological process	16/74 21.6%	0.0002001	HDAC4 MED1 BTG2 CREBBP BTG1 BCL11B SOX11 MITF FOS BAZ1B NR4A1 NR4A3 DDIT3 TAOK1 MBIP CDK5R1
anatomical structure development	18/74 24.3%	0.0002815	HDAC4 MED1 LINGO1 BTG2 SRRM4 CREBBP BCL11B CTNND2 TSHZ1 SOX11 MITF FOS BAZ1B CIT NR4A3 DCX MBIP CDK5R1
developmental process	20/74 27.0%	0.0002912	HDAC4 MED1 LINGO1 BTG2 SRRM4 CREBBP BCL11B CTNND2 TSHZ1 SOX11 MITF FOS BAZ1B CIT SPRED2 NR4A3 DCX MBIP RUNX1T1 CDK5R1
chromosome organization	7/74 9.4%	0.00047509	HDAC4 CREBBP BAZ1B HMGN3 PHF21A CIT MAD2L1
nervous system development	11/74 14.8%	0.00055595	MED1 LINGO1 BTG2 SRRM4 BCL11B DCX MBIP SOX11 FOS CIT CDK5R1
system development	16/74 21.6%	0.0011012	HDAC4 MED1 LINGO1 BTG2 SRRM4 BCL11B TSHZ1 SOX11 MITF FOS BAZ1B CIT NR4A3 DCX MBIP CDK5R1
mitotic sister chromatid segregation	2/74 2.7%	0.0011738	CIT MAD2L1
sister chromatid segregation	2/74 2.7%	0.0011738	CIT MAD2L1
multicellular organismal development	18/74 24.3%	0.0011769	HDAC4 MED1 LINGO1 BTG2 SRRM4 BCL11B CTNND2 TSHZ1 SOX11 MITF FOS BAZ1B CIT SPRED2 NR4A3 DCX MBIP CDK5R1
ER overload response	2/74 2.7%	0.0015859	DDIT3 MBIP
cell differentiation	13/74 17.5%	0.0038883	HDAC4 MED1 LINGO1 BTG2 SRRM4 CREBBP BCL11B SOX11 MITF CIT DCX RUNX1T1 CDK5R1
central nervous system development	6/74 8.1%	0.0039089	MED1 LINGO1 BCL11B DCX MBIP CDK5R1
chromatin modification	5/74 6.7%	0.0043537	HDAC4 CREBBP BAZ1B HMGN3 PHF21A
cellular developmental process	13/74 17.5%	0.0047081	HDAC4 MED1 LINGO1 BTG2 SRRM4 CREBBP BCL11B SOX11 MITF CIT DCX RUNX1T1 CDK5R1
cellular component organization	14/74 18.9%	0.0047081	HDAC4 LINGO1 CREBBP BCL11B KCNB1 BAZ1B PRKAB1 PHF21A CIT BIN3 DCX HMGN3 MAD2L1 CDK5R1
intracellular signaling pathway	9/74 12.1%	0.0047504	SPRED2 MED1 LINGO1 LRRK2 DDIT3 DCX MBIP NLK CIT
regulation of catalytic activity	8/74 10.8%	0.0066696	TBC1D8B SPRED2 NR4A1 BTG1 TAOK1 MBIP PRKAB1 CDK5R1
transcription from RNA polymerase II promoter	3/74 4.0%	0.0067675	MED1 DDIT3 FOS
sensory organ development	5/74 6.7%	0.0067675	MED1 NR4A3 BCL11B TSHZ1 MITF
neuron projection development	5/74 6.7%	0.0070096	LINGO1 BCL11B DCX CIT CDK5R1
endoplasmic reticulum unfolded protein response	2/74 2.7%	0.0083101	DDIT3 MBIP
cellular response to unfolded protein	2/74 2.7%	0.0083101	DDIT3 MBIP
regulation of developmental process	8/74 10.8%	0.0083101	HDAC4 MED1 LINGO1 CREBBP BTG1 MBIP MITF CIT
chromatin organization	5/74 6.7%	0.0084195	HDAC4 CREBBP BAZ1B HMGN3 PHF21A
macromolecule methylation	3/74 4.0%	0.008957	MED1 BTG2 BTG1
cytokinesis	2/74 2.7%	0.008957	BIN3 CIT
post-translational protein modification	9/74 12.1%	0.009574	BTG2 CREBBP BTG1 CDKL5 LRRK2 TAOK1 NLK CIT CDK5R1
neuron differentiation	6/74 8.1%	0.010534	LINGO1 BTG2 BCL11B DCX CIT CDK5R1
regulation of skeletal muscle fiber development	2/74 2.7%	0.010665	HDAC4 BTG1
regulation of apoptosis	7/74 9.4%	0.010994	MED1 NR4A1 BTG2 BCL11B DDIT3 MITF CDK5R1
macromolecule modification	10/74 13.5%	0.010994	MED1 BTG2 CREBBP BTG1 CDKL5 LRRK2 TAOK1 NLK CIT CDK5R1
regulation of DNA binding	3/74 4.0%	0.010994	CREBBP DDIT3 RUNX1T1
regulation of programmed cell death	7/74 9.4%	0.011544	MED1 NR4A1 BTG2 BCL11B DDIT3 MITF CDK5R1
negative regulation of gene expression	6/74 8.1%	0.012277	HDAC4 PER3 AGO3 BHLHE41 PHF21A RUNX1T1
regulation of cell death	7/74 9.4%	0.012624	MED1 NR4A1 BTG2 BCL11B DDIT3 MITF CDK5R1
central nervous system neuron differentiation	3/74 4.0%	0.013975	LINGO1 BCL11B DCX
response to endoplasmic reticulum stress	2/74 2.7%	0.013975	DDIT3 MBIP
response to protein stimulus	3/74 4.0%	0.014206	DDIT3 MBIP FOS
cell development	7/74 9.4%	0.015624	HDAC4 LINGO1 CREBBP BCL11B DCX CIT CDK5R1
regulation of skeletal muscle tissue development	2/74 2.7%	0.015856	HDAC4 BTG1
ER-nucleus signaling pathway	2/74 2.7%	0.016473	DDIT3 MBIP
neuron development	5/74 6.7%	0.016473	LINGO1 BCL11B DCX CIT CDK5R1
methylation	3/74 4.0%	0.016473	MED1 BTG2 BTG1
regulation of striated muscle cell differentiation	2/74 2.7%	0.016473	HDAC4 BTG1
regulation of binding	3/74 4.0%	0.016473	CREBBP DDIT3 RUNX1T1
negative regulation of cell differentiation	4/74 5.4%	0.016473	HDAC4 LINGO1 CREBBP CIT
negative regulation of CREB transcription factor activity	1/74 1.3%	0.016473	DDIT3
regulation of nuclease activity	1/74 1.3%	0.016473	MBIP
positive regulation of nuclease activity	1/74 1.3%	0.016473	MBIP
response to inactivity	1/74 1.3%	0.016473	HDAC4
response to muscle inactivity	1/74 1.3%	0.016473	HDAC4
response to muscle inactivity involved in regulation of muscle adaptation	1/74 1.3%	0.016473	HDAC4
response to denervation involved in regulation of muscle adaptation	1/74 1.3%	0.016473	HDAC4
vestibular reflex	1/74 1.3%	0.016473	NR4A3
regulation of cardiac muscle contraction by calcium ion signaling	1/74 1.3%	0.016473	HDAC4
negative regulation of glycolysis	1/74 1.3%	0.016473	HDAC4
mRNA transcription from RNA polymerase II promoter	1/74 1.3%	0.016473	DDIT3
positive regulation of mammary gland epithelial cell proliferation	1/74 1.3%	0.016473	MED1
activation of signaling protein activity involved in unfolded protein response	1/74 1.3%	0.016473	MBIP
barrier septum formation	1/74 1.3%	0.016473	BIN3
regulation of cell differentiation	6/74 8.1%	0.017364	HDAC4 LINGO1 CREBBP BTG1 MITF CIT
cellular response to protein stimulus	2/74 2.7%	0.018066	DDIT3 MBIP
cell projection organization	5/74 6.7%	0.018066	LINGO1 BCL11B DCX CIT CDK5R1
phosphorus metabolic process	8/74 10.8%	0.018728	CDKL5 LRRK2 TAOK1 PTPRO NLK PRKAB1 CIT CDK5R1
phosphate metabolic process	8/74 10.8%	0.018728	CDKL5 LRRK2 TAOK1 PTPRO NLK PRKAB1 CIT CDK5R1
transcription, DNA-dependent	3/74 4.0%	0.018749	MED1 DDIT3 FOS
anatomical structure morphogenesis	9/74 12.1%	0.01932	MED1 NR4A3 BCL11B CTNND2 TSHZ1 DCX MBIP BAZ1B CDK5R1
protein modification process	9/74 12.1%	0.019697	BTG2 CREBBP BTG1 CDKL5 LRRK2 TAOK1 NLK CIT CDK5R1
cellular protein metabolic process	11/74 14.8%	0.01999	BTG2 CREBBP BTG1 CDKL5 FKBP14 LRRK2 TAOK1 MBIP NLK CIT CDK5R1
RNA biosynthetic process	3/74 4.0%	0.01999	MED1 DDIT3 FOS
phosphorylation	7/74 9.4%	0.021229	CDKL5 LRRK2 TAOK1 NLK PRKAB1 CIT CDK5R1
central nervous system neuron development	2/74 2.7%	0.022302	LINGO1 DCX
regulation of muscle cell differentiation	2/74 2.7%	0.023347	HDAC4 BTG1
negative regulation of transcription from RNA polymerase II promoter	4/74 5.4%	0.026256	HDAC4 PER3 BHLHE41 PHF21A
negative regulation of macromolecule metabolic process	6/74 8.1%	0.02629	HDAC4 PER3 AGO3 BHLHE41 PHF21A RUNX1T1
negative regulation of transcription	5/74 6.7%	0.026429	HDAC4 PER3 BHLHE41 PHF21A RUNX1T1
cell cycle	6/74 8.1%	0.026429	BIN3 DDIT3 RAB11FIP3 CIT MAD2L1 CDK5R1
hindbrain structural organization	1/74 1.3%	0.026429	MBIP
mRNA transcription	1/74 1.3%	0.026429	DDIT3
cerebellum structural organization	1/74 1.3%	0.026429	MBIP
serine phosphorylation of STAT3 protein	1/74 1.3%	0.026429	NLK
response to stimulus involved in regulation of muscle adaptation	1/74 1.3%	0.026429	HDAC4
soft palate development	1/74 1.3%	0.026429	TSHZ1
cytokinetic process	1/74 1.3%	0.026429	BIN3
fatty acid elongation	1/74 1.3%	0.026429	ELOVL6
neuron cell-cell adhesion	1/74 1.3%	0.026429	CDK5R1
cellular response to stress	5/74 6.7%	0.026429	MED1 BTG2 DDIT3 MBIP BAZ1B
negative regulation of developmental process	4/74 5.4%	0.026566	HDAC4 LINGO1 CREBBP CIT
camera-type eye development	3/74 4.0%	0.026792	MED1 BCL11B MITF
protein amino acid phosphorylation	6/74 8.1%	0.026792	CDKL5 LRRK2 TAOK1 NLK CIT CDK5R1
one-carbon metabolic process	3/74 4.0%	0.026977	MED1 BTG2 BTG1
generation of neurons	6/74 8.1%	0.028001	LINGO1 BTG2 BCL11B DCX CIT CDK5R1
response to unfolded protein	2/74 2.7%	0.028001	DDIT3 MBIP
dendrite development	2/74 2.7%	0.028001	DCX CIT
brain development	4/74 5.4%	0.028698	MED1 DCX MBIP CDK5R1
regulation of multicellular organismal process	8/74 10.8%	0.029016	HDAC4 MED1 LINGO1 BTG1 CTNND2 MBIP MITF CIT
positive regulation of apoptosis	4/74 5.4%	0.029016	MED1 NR4A1 DDIT3 CDK5R1
regulation of cell development	4/74 5.4%	0.029176	HDAC4 LINGO1 BTG1 CIT
positive regulation of programmed cell death	4/74 5.4%	0.029639	MED1 NR4A1 DDIT3 CDK5R1
negative regulation of nucleobase, nucleoside, nucleotide and nucleic acid metabolic process	5/74 6.7%	0.029639	HDAC4 PER3 BHLHE41 PHF21A RUNX1T1
negative regulation of metabolic process	6/74 8.1%	0.031015	HDAC4 PER3 AGO3 BHLHE41 PHF21A RUNX1T1
positive regulation of cell death	4/74 5.4%	0.031015	MED1 NR4A1 DDIT3 CDK5R1
protein amino acid alkylation	2/74 2.7%	0.031015	BTG2 BTG1
protein amino acid methylation	2/74 2.7%	0.031015	BTG2 BTG1
negative regulation of nitrogen compound metabolic process	5/74 6.7%	0.031089	HDAC4 PER3 BHLHE41 PHF21A RUNX1T1
cell division	4/74 5.4%	0.031212	BIN3 RAB11FIP3 CIT MAD2L1
cellular response to biotic stimulus	2/74 2.7%	0.031665	DDIT3 MBIP
regulation of striated muscle tissue development	2/74 2.7%	0.03201	HDAC4 BTG1
chromosome segregation	2/74 2.7%	0.03201	CIT MAD2L1
neurogenesis	6/74 8.1%	0.03201	LINGO1 BTG2 BCL11B DCX CIT CDK5R1
positive regulation of embryonic development	1/74 1.3%	0.03201	MBIP
T cell receptor V(D)J recombination	1/74 1.3%	0.03201	BCL11B
serine phosphorylation of STAT protein	1/74 1.3%	0.03201	NLK
somatic diversification of T cell receptor genes	1/74 1.3%	0.03201	BCL11B
semicircular canal morphogenesis	1/74 1.3%	0.03201	NR4A3
somatic recombination of T cell receptor gene segments	1/74 1.3%	0.03201	BCL11B
chromatin-mediated maintenance of transcription	1/74 1.3%	0.03201	BAZ1B
germ-line stem cell maintenance	1/74 1.3%	0.03201	CREBBP
protein metabolic process	12/74 16.2%	0.03201	BTG2 CREBBP BTG1 CDKL5 FKBP14 LRRK2 DDI2 TAOK1 MBIP NLK CIT CDK5R1
negative regulation of macromolecule biosynthetic process	5/74 6.7%	0.03201	HDAC4 PER3 BHLHE41 PHF21A RUNX1T1
circadian rhythm	2/74 2.7%	0.03243	PER3 BHLHE41
regulation of muscle organ development	2/74 2.7%	0.03243	HDAC4 BTG1
negative regulation of cellular biosynthetic process	5/74 6.7%	0.035078	HDAC4 PER3 BHLHE41 PHF21A RUNX1T1
cellular response to stimulus	6/74 8.1%	0.035505	MED1 BTG2 DDIT3 MBIP FOS BAZ1B
eye development	3/74 4.0%	0.035505	MED1 BCL11B MITF
negative regulation of biosynthetic process	5/74 6.7%	0.036512	HDAC4 PER3 BHLHE41 PHF21A RUNX1T1
negative regulation of neurogenesis	2/74 2.7%	0.0389	LINGO1 CIT
G2/M transition of mitotic cell cycle	1/74 1.3%	0.039112	CIT
epithelial cell proliferation involved in mammary gland duct elongation	1/74 1.3%	0.039112	MED1
entrainment of circadian clock	1/74 1.3%	0.039112	BHLHE41
semicircular canal development	1/74 1.3%	0.039112	NR4A3
negative regulation of dendrite morphogenesis	1/74 1.3%	0.039112	CIT
positive regulation of gene expression, epigenetic	1/74 1.3%	0.039112	BAZ1B
mitotic metaphase/anaphase transition	1/74 1.3%	0.039112	CIT
organ development	10/74 13.5%	0.039112	HDAC4 MED1 NR4A3 BCL11B TSHZ1 DCX MBIP MITF BAZ1B CDK5R1
negative regulation of cell development	2/74 2.7%	0.04207	LINGO1 CIT
negative regulation of transcription, DNA-dependent	4/74 5.4%	0.04237	HDAC4 PER3 BHLHE41 PHF21A
response to stimulus	13/74 17.5%	0.042465	HDAC4 MED1 BTG2 CTNND2 BHLHE41 FOS BAZ1B PRKAB1 PHF21A NR4A3 DDIT3 MBIP CHST2
regulation of gene expression, epigenetic	2/74 2.7%	0.042465	MED1 BAZ1B
fat cell differentiation	2/74 2.7%	0.042465	MED1 RUNX1T1
negative regulation of RNA metabolic process	4/74 5.4%	0.042734	HDAC4 PER3 BHLHE41 PHF21A
axonogenesis	3/74 4.0%	0.044721	BCL11B DCX CDK5R1
branch elongation involved in mammary gland duct branching	1/74 1.3%	0.046063	MED1
thyroid hormone generation	1/74 1.3%	0.046063	MED1
regulation of glycolysis	1/74 1.3%	0.046063	HDAC4
regulation of transcription factor activity	2/74 2.7%	0.046063	CREBBP DDIT3
regulation of transcription regulator activity	2/74 2.7%	0.046063	CREBBP DDIT3
neuron migration	2/74 2.7%	0.04847	DCX CDK5R1
negative regulation of molecular function	3/74 4.0%	0.048954	SPRED2 NR4A1 DDIT3
response to stress	8/74 10.8%	0.049421	HDAC4 MED1 BTG2 DDIT3 MBIP BAZ1B PRKAB1 CHST2

## Sheet: PFC_Active_Enhancer
Go description	Counts	Corrected p-value	Genes
cellular process	317/539 58.8%	2.1104e-38	ATF1 EPHB6 PGAP1 GDE1 TXNDC11 ZDHHC7 RBPJ GLS NFU1 AS3MT WDR92 PIP4K2B FAM53A PRKACA ATP6V1E1 SLC12A6 GLCE RPL22 GABRG3 GABRG2 CDC40 RUNX2 SLC5A7 TIAM1 RBP2 PPP1R3C COL8A2 ALPK3 SIK2 FREM1 RIN2 IDO1 SLC45A4 SLC22A4 ADCYAP1R1 SHMT2 MFI2 PDE1A MTTP NEDD4L AGAP1 ABCB8 PIK3R1 MRPL13 KALRN EPB41L5 CYP27B1 SNX4 GALR1 HESX1 STK38L ST3GAL1 PPARGC1A PAG1 SCAI STAT5A STAT5B WWTR1 CDK19 ACE JAG1 EGR3 ARPP21…
primary metabolic process	211/539 39.1%	4.7523e-24	ATF1 EPHB6 PGAP1 GDE1 ZDHHC7 GLS PIP4K2B PRKACA ATP6V1E1 GLCE RPL22 CDC40 RUNX2 SLC5A7 RBP2 PPP1R3C ALPK3 SIK2 IDO1 SLC22A4 SHMT2 PDE1A MTTP NEDD4L AGAP1 PIK3R1 MRPL13 KALRN CYB5R1 CYP27B1 HESX1 STK38L ST3GAL1 PPARGC1A SCAI STAT5A STAT5B WWTR1 CDK19 ACE EGR3 BCL11A TRIP4 BRAF NFATC1 PBX1 DCLK1 GNPTG GLUD1 CYLD RPS29 HNRNPF CDS2 PCSK2 ITK FKBP14 AATK BRCA2 PPP3CA HEY2 RPLP2 ACADS DUSP4 DFFA TSC22D…
metabolic process	231/539 42.8%	6.6643e-24	ATF1 EPHB6 PGAP1 GDE1 ZDHHC7 IFI30 GLS NFU1 AS3MT PIP4K2B PRKACA ATP6V1E1 PDHX GLCE RPL22 CDC40 RUNX2 SLC5A7 RBP2 PPP1R3C ALPK3 SIK2 IDO1 SLC22A4 SHMT2 PDE1A MTTP NEDD4L AGAP1 PIK3R1 MRPL13 KALRN CYB5R1 CYP27B1 HESX1 STK38L ST3GAL1 PPARGC1A PAG1 SCAI STAT5A STAT5B WWTR1 CDK19 ACE EGR3 BCL11A MICAL3 TRIP4 BRAF NFATC1 PBX1 DCLK1 GNPTG GLUD1 CYLD UCK1 RPS29 HNRNPF CDS2 PCSK2 ITK FKBP14 AATK BRCA2 PP…
biological regulation	241/539 44.7%	5.0539e-22	ATF1 TXNDC11 RBPJ IFI30 GLS PRKACA TBC1D10A TMPO OLFR160 IL1R1 VMN1R21 GABRG3 GABRG2 RUNX2 SLC5A7 TIAM1 PPP1R3C CDC37 SIK2 RIN2 IDO1 ADCYAP1R1 TBC1D9B SHMT2 MFI2 PDE1A MTTP NEDD4L AGAP1 OLFR1436 PIK3R1 KALRN CD79B EPB41L5 OLFR624 GALR1 OLFR10 HESX1 STK38L PPARGC1A PAG1 SCAI STAT5A STAT5B WWTR1 ACE NDFIP1 JAG1 EGR3 BCL11A TRIP4 BRAF NFATC1 PBX1 DCLK1 SNAP91 GLUD1 KITL RGL1 PCSK2 BTG3 UCMA ICA1 LRR…
cellular metabolic process	198/539 36.7%	4.3276e-21	ATF1 EPHB6 PGAP1 GDE1 ZDHHC7 GLS NFU1 AS3MT PIP4K2B PRKACA ATP6V1E1 GLCE RPL22 CDC40 RUNX2 SLC5A7 RBP2 PPP1R3C ALPK3 SIK2 IDO1 SLC22A4 SHMT2 PDE1A MTTP NEDD4L AGAP1 PIK3R1 MRPL13 KALRN CYP27B1 HESX1 STK38L ST3GAL1 PPARGC1A SCAI STAT5A STAT5B WWTR1 CDK19 ACE EGR3 BCL11A TRIP4 BRAF NFATC1 PBX1 DCLK1 GNPTG GLUD1 CYLD RPS29 HNRNPF CDS2 ITK FKBP14 AATK BRCA2 PPP3CA HEY2 RPLP2 ACADS DUSP4 DFFA TSC22D1 …
regulation of biological process	226/539 41.9%	4.9169e-20	ATF1 TXNDC11 RBPJ IFI30 GLS PRKACA TBC1D10A TMPO OLFR160 IL1R1 VMN1R21 GABRG3 GABRG2 RUNX2 TIAM1 PPP1R3C CDC37 SIK2 RIN2 IDO1 ADCYAP1R1 TBC1D9B SHMT2 PDE1A NEDD4L AGAP1 OLFR1436 PIK3R1 KALRN CD79B EPB41L5 OLFR624 GALR1 OLFR10 HESX1 STK38L PPARGC1A PAG1 SCAI STAT5A STAT5B WWTR1 ACE NDFIP1 JAG1 EGR3 BCL11A TRIP4 BRAF NFATC1 PBX1 SNAP91 GLUD1 KITL RGL1 BTG3 UCMA ICA1 LRRC32 BRCA2 PPP3CA ENSA HEY2 SH…
macromolecule metabolic process	170/539 31.5%	2.0466e-19	ATF1 EPHB6 PGAP1 KDM1B ZBTB20 TRP63 ZDHHC7 PLAT TSEN2 THG1L CNDP2 EFTUD1 PPP1CB PAPOLG PIM1 PRKACA PHLDA1 RPP38 TLE3 CSNK1G3 GLCE RPL22 F2R FBXO15 CDC40 RUNX2 SAP30 FOXP1 MELK PPP1R3C MSH4 MADD ALPK3 GEMIN6 SNRPF SIK2 RAF1 FKBP5 KHDRBS3 MTTP PXN NEDD4L PIK3R1 MRPL13 KALRN PRPF8 ZFP36L1 HMBOX1 NEUROD6 HESX1 STK38L ST3GAL1 PPARGC1A SOCS7 SCAI STAT5A STAT5B WWTR1 CDK19 ACE EGR3 OPN3 BCL11A NEK7 TRIP…
developmental process	128/539 23.7%	6.7834e-19	ATF1 PGAP1 KDM1B CEP120 TRP63 RBPJ KIF5C PRKACA RNF111 RGS6 TLE3 RPL22 F2R GABRG2 RUNX2 ERMN FOXP1 TIAM1 COL4A1 MSH4 LY6D COL8A2 ALPK3 FREM1 PPIA SPATA9 ADCYAP1R1 FECH PXN ITPR1 LTBP2 PIK3R1 KALRN RTN4 ZFP36L1 EPB41L5 CYP27B1 NEUROD6 HESX1 SOCS7 PAG1 BTF3 STAT5A STAT5B WWTR1 PHC2 ACE JAG1 EGR3 BCL11A GPR98 NFATC1 MLL5 SMAD6 PBX1 DCLK1 SNAP91 ARHGAP24 EXT1 EFNA1 IGSF10 COL5A1 KITL FAT3 CSPG4 SERIN…
regulation of cellular process	215/539 39.8%	8.4551e-19	ATF1 TXNDC11 RBPJ IFI30 PRKACA TBC1D10A TMPO OLFR160 IL1R1 VMN1R21 GABRG3 GABRG2 RUNX2 TIAM1 PPP1R3C CDC37 SIK2 RIN2 IDO1 ADCYAP1R1 TBC1D9B SHMT2 PDE1A AGAP1 OLFR1436 PIK3R1 KALRN EPB41L5 OLFR624 GALR1 OLFR10 HESX1 PPARGC1A PAG1 SCAI STAT5A STAT5B WWTR1 ACE NDFIP1 JAG1 EGR3 BCL11A TRIP4 BRAF NFATC1 PBX1 SNAP91 GLUD1 KITL RGL1 BTG3 UCMA ICA1 LRRC32 BRCA2 PPP3CA ENSA HEY2 SH3PXD2B CCR2 DUSP4 DFFA E…
cellular macromolecule metabolic process	154/539 28.5%	3.8108e-18	ATF1 EPHB6 PGAP1 KDM1B ZBTB20 TRP63 ZDHHC7 TSEN2 THG1L EFTUD1 PPP1CB PAPOLG PIM1 PRKACA PHLDA1 RPP38 TLE3 CSNK1G3 GLCE RPL22 F2R FBXO15 CDC40 RUNX2 SAP30 FOXP1 MELK PPP1R3C MSH4 MADD ALPK3 GEMIN6 SNRPF SIK2 RAF1 FKBP5 KHDRBS3 MTTP PXN NEDD4L PIK3R1 MRPL13 KALRN PRPF8 ZFP36L1 HMBOX1 NEUROD6 HESX1 STK38L ST3GAL1 PPARGC1A SOCS7 SCAI STAT5A STAT5B WWTR1 CDK19 EGR3 OPN3 BCL11A NEK7 TRIP4 BRAF NFATC1 F…
multicellular organismal development	120/539 22.2%	7.7268e-18	ATF1 PGAP1 KDM1B CEP120 TRP63 RBPJ KIF5C PRKACA RNF111 RGS6 TLE3 RPL22 F2R GABRG2 RUNX2 FOXP1 TIAM1 COL4A1 MSH4 LY6D COL8A2 ALPK3 FREM1 PPIA SPATA9 ADCYAP1R1 FECH PXN ITPR1 LTBP2 PIK3R1 KALRN RTN4 ZFP36L1 EPB41L5 NEUROD6 HESX1 BTF3 STAT5A STAT5B WWTR1 PHC2 ACE JAG1 EGR3 BCL11A GPR98 NFATC1 MLL5 SMAD6 PBX1 DCLK1 SNAP91 ARHGAP24 EXT1 EFNA1 IGSF10 COL5A1 KITL FAT3 CSPG4 SERINC5 PCSK2 HSP90AB1 BRCA2 …
anatomical structure development	102/539 18.9%	1.7673e-13	ATF1 PGAP1 CEP120 TRP63 RBPJ KIF5C PRKACA RGS6 RPL22 F2R RUNX2 ERMN FOXP1 TIAM1 COL4A1 MSH4 LY6D COL8A2 ALPK3 PPIA FECH PXN LTBP2 PIK3R1 KALRN RTN4 ZFP36L1 EPB41L5 NEUROD6 HESX1 STAT5A STAT5B WWTR1 ACE JAG1 EGR3 BCL11A GPR98 NFATC1 MLL5 SMAD6 PBX1 DCLK1 SNAP91 ARHGAP24 EXT1 EFNA1 IGSF10 COL5A1 KITL CSPG4 SERINC5 PCSK2 HSP90AB1 BRCA2 PPP3CA CASP7 HEY2 CCR2 EDN1 MKKS GPX1 ITGA4 SHROOM3 RHOA RHOB RG…
system development	96/539 17.8%	1.7673e-13	ATF1 PCSK2 PGAP1 HSP90AB1 CEP120 TRP63 RBPJ BRCA2 PPP3CA CASP7 KIF5C HEY2 PRKACA RGS6 CCR2 EDN1 MKKS GPX1 ITGA4 RPL22 F2R SHROOM3 RUNX2 RHOA FOXP1 RHOB RGMA TIAM1 ZAP70 ACTA1 IFNG COL4A1 MSH4 LY6D COL8A2 MTAP2 ALPK3 ARHGEF7 PPIA CD44 GAS7 SMARCD3 HLF FECH LTBP2 RNF6 PIK3R1 KALRN CLCN2 RTN4 ZFP36L1 DLL3 EPB41L5 DNAJB6 NEUROD6 RAB23 ERBB2 HESX1 METTL8 STAT5A ANGPT4 NTRK2 STAT5B WWTR1 NPM1 ACE JAG1 …
regulation of cell communication	56/539 10.3%	2.5162e-13	ICA1 ARHGEF10L NENF PPP3CA ENSA PRKACA TBC1D10A RGS6 CCR2 DUSP4 EDN1 GPX1 RIPK2 F2R ARAP2 RUNX2 RHOA TIAM1 ZAP70 TBC1D2 NPC1 IFNG CDC37 MADD ARHGEF3 TLR6 EEF1E1 ARHGEF7 CD44 TBC1D9B PXN AGAP1 AKAP7 HMGCR KALRN RTN4 DLL3 ATXN1 ERBB2 SOCS7 SCAI NTRK2 JAG1 ARHGEF37 ARHGEF38 BRAF CCK HIPK3 EFNA1 GLUD1 DNMBP KITL CTNNB1 CSPG4 GHRL RGL1
regulation of signaling pathway	48/539 8.9%	3.7516e-13	TBC1D9B PXN AGAP1 AKAP7 ARHGEF10L NENF HMGCR KALRN DLL3 ATXN1 RAB23 ERBB2 TBC1D10A SCAI CCR2 DUSP4 NPM1 JAG1 GPX1 ARHGEF37 RIPK2 F2R ARHGEF38 ARAP2 BRAF CCK HIPK3 RUNX2 RHOA RGMA EFNA1 TIAM1 ZAP70 TBC1D2 DNMBP IFNG KITL CDC37 MADD ARHGEF3 CTNNB1 CSPG4 SIK2 TLR6 RGL1 EEF1E1 ARHGEF7 CD44
regulation of signal transduction	41/539 7.6%	2.0666e-12	TBC1D9B PXN AGAP1 AKAP7 ARHGEF10L NENF HMGCR KALRN ERBB2 SOCS7 TBC1D10A SCAI RGS6 CCR2 DUSP4 GPX1 ARHGEF37 RIPK2 F2R ARHGEF38 ARAP2 BRAF CCK HIPK3 RHOA EFNA1 TIAM1 ZAP70 TBC1D2 DNMBP IFNG KITL CDC37 MADD ARHGEF3 CTNNB1 CSPG4 TLR6 RGL1 ARHGEF7 CD44
cell differentiation	80/539 14.8%	2.6932e-12	ATF1 CEP120 TRP63 RBPJ BRCA2 PPP3CA KIF5C HEY2 SH3PXD2B RGS6 TLE3 EDN1 MKKS GPX1 RPL22 F2R SHROOM3 RUNX2 RHOA FOXP1 RHOB ETV6 TIAM1 ZAP70 ACTA1 IFNG LY6D MTAP2 ARHGEF7 PPIA CD44 GAS7 SPATA9 ADCYAP1R1 SMARCD3 HLF FECH RNF6 PIK3R1 NR2C2 KALRN CLCN2 RTN4 ZFP36L1 DLL3 EPB41L5 NEUROD6 ERBB2 METTL8 SOCS7 PAG1 STAT5A NTRK2 STAT5B WWTR1 NPM1 ACE JAG1 ANGPT2 NOS2 BCL11A GPR98 NFATC1 CCK MLL5 MAPK14 PBX1 D…
regulation of signaling process	41/539 7.6%	2.6932e-12	TBC1D9B PXN AGAP1 AKAP7 ARHGEF10L NENF HMGCR KALRN ERBB2 SOCS7 TBC1D10A SCAI RGS6 CCR2 DUSP4 GPX1 ARHGEF37 RIPK2 F2R ARHGEF38 ARAP2 BRAF CCK HIPK3 RHOA EFNA1 TIAM1 ZAP70 TBC1D2 DNMBP IFNG KITL CDC37 MADD ARHGEF3 CTNNB1 CSPG4 TLR6 RGL1 ARHGEF7 CD44
multicellular organismal process	154/539 28.5%	2.7681e-12	ATF1 PGAP1 KDM1B CEP120 TRP63 PLAT RBPJ GLS KIF5C OLFR681 PRKACA RNF111 RGS6 OLFR160 TLE3 RPL22 F2R GABRG2 RUNX2 ERMN FOXP1 OLFR677 SLC5A7 OLFR676 TIAM1 COL4A1 MSH4 OLFR675 LY6D COL8A2 ALPK3 FREM1 PPIA IDO1 SPATA9 ADCYAP1R1 FECH PXN ITPR1 LTBP2 OLFR1436 PIK3R1 KALRN RTN4 ZFP36L1 EPB41L5 OLFR624 OLFR107 ATXN1 NEUROD6 GALR1 OLFR10 HESX1 BTF3 STAT5A STAT5B WWTR1 PHC2 ACE JAG1 EGR3 OPN3 BCL11A GPR98 …
cellular developmental process	81/539 15.0%	3.1779e-12	ATF1 CEP120 TRP63 RBPJ BRCA2 PPP3CA KIF5C HEY2 SH3PXD2B RGS6 TLE3 EDN1 MKKS GPX1 RPL22 F2R SHROOM3 RUNX2 RHOA FOXP1 RHOB ETV6 TIAM1 ZAP70 ACTA1 IFNG LY6D MTAP2 ARHGEF7 PPIA CD44 GAS7 SPATA9 ADCYAP1R1 SMARCD3 HLF FECH RNF6 PIK3R1 NR2C2 KALRN CLCN2 RTN4 ZFP36L1 DLL3 EPB41L5 NEUROD6 TMEM67 ERBB2 METTL8 SOCS7 PAG1 STAT5A NTRK2 STAT5B WWTR1 NPM1 ACE JAG1 ANGPT2 NOS2 BCL11A GPR98 NFATC1 CCK MLL5 MAPK14…
protein metabolic process	91/539 16.8%	1.1154e-11	EPHB6 PCSK2 ITK PGAP1 HSP90AB1 FKBP14 KDM1B LRRK1 PPWD1 AATK ZDHHC7 PLAT CNDP2 EFTUD1 PPP1CB PPP3CA CASP7 PIM1 RPLP2 PRKACA DUSP4 CSNK1G3 MKKS GPX1 PPP1R12A CAMK1D RIPK2 RPL22 F2R FBXO15 TEX14 PRSS12 F7 ZAP70 MELK IFNG MMP17 MADD PIGK MTAP2 ALPK3 SIK2 EEF1E1 RAF1 FKBP5 USP14 ROCK2 MTTP PXN NEDD4L RPS27L RNF6 PIK3R1 MRPL13 KALRN PRSS52 NRIP2 ERBB2 STK38L AGA MGAT2 METTL8 ST3GAL1 SOCS7 MAP4K4 STAT5…
phosphorylation	49/539 9.0%	1.3649e-11	EPHB6 ITK LRRK1 AATK PIM1 PIP4K2B PRKACA ATP6V1E1 CSNK1G3 CAMK1D RIPK2 F2R TEX14 ZAP70 MELK DBF4 IFNG MADD MTAP2 ALPK3 SIK2 RAF1 ROCK2 PXN PIK3R1 UQCR10 KALRN ERBB2 STK38L ATP6V1H MAP4K4 STAT5A NTRK2 CDK19 NEK7 BRAF CCK MAPK14 HIPK3 DCLK1 EFNA1 IGSF10 CDK7 SNRK TAOK1 STK17B CSPG4 PFKP GALK2
phosphorus metabolic process	55/539 10.2%	1.7953e-11	EPHB6 ITK LRRK1 AATK PPP1CB PPP3CA PIM1 PIP4K2B PRKACA ATP6V1E1 DUSP4 CSNK1G3 PPP1R12A CAMK1D RIPK2 F2R TEX14 ZAP70 MELK DBF4 IFNG MADD MTAP2 ALPK3 SIK2 RAF1 ROCK2 PXN PIK3R1 UQCR10 KALRN NT5C3 ERBB2 STK38L ATP6V1H MAP4K4 STAT5A NTRK2 CDK19 NEK7 BRAF CCK MAPK14 HIPK3 DCLK1 PPP1CA EFNA1 IGSF10 CDK7 SNRK TAOK1 STK17B CSPG4 PFKP GALK2
phosphate metabolic process	55/539 10.2%	1.7953e-11	EPHB6 ITK LRRK1 AATK PPP1CB PPP3CA PIM1 PIP4K2B PRKACA ATP6V1E1 DUSP4 CSNK1G3 PPP1R12A CAMK1D RIPK2 F2R TEX14 ZAP70 MELK DBF4 IFNG MADD MTAP2 ALPK3 SIK2 RAF1 ROCK2 PXN PIK3R1 UQCR10 KALRN NT5C3 ERBB2 STK38L ATP6V1H MAP4K4 STAT5A NTRK2 CDK19 NEK7 BRAF CCK MAPK14 HIPK3 DCLK1 PPP1CA EFNA1 IGSF10 CDK7 SNRK TAOK1 STK17B CSPG4 PFKP GALK2
cellular protein metabolic process	77/539 14.2%	2.1821e-11	EPHB6 ITK PGAP1 HSP90AB1 FKBP14 KDM1B LRRK1 PPWD1 AATK ZDHHC7 EFTUD1 PPP1CB PPP3CA PIM1 RPLP2 PRKACA DUSP4 CSNK1G3 MKKS GPX1 PPP1R12A CAMK1D RIPK2 RPL22 F2R FBXO15 TEX14 ZAP70 MELK IFNG MADD PIGK MTAP2 ALPK3 SIK2 EEF1E1 RAF1 FKBP5 USP14 ROCK2 MTTP PXN NEDD4L RPS27L RNF6 PIK3R1 MRPL13 KALRN ERBB2 STK38L MGAT2 METTL8 ST3GAL1 SOCS7 MAP4K4 STAT5A NTRK2 CDK19 OPN3 NEK7 BRAF CCK MAPK14 USP28 HIPK3 DCLK…
protein modification process	62/539 11.5%	3.5129e-11	EPHB6 ITK PGAP1 KDM1B LRRK1 AATK ZDHHC7 PPP1CB PPP3CA PIM1 PRKACA DUSP4 CSNK1G3 GPX1 PPP1R12A CAMK1D RIPK2 F2R FBXO15 TEX14 ZAP70 MELK IFNG MADD PIGK MTAP2 ALPK3 SIK2 RAF1 ROCK2 MTTP PXN NEDD4L RNF6 PIK3R1 KALRN ERBB2 STK38L MGAT2 METTL8 ST3GAL1 SOCS7 MAP4K4 STAT5A NTRK2 CDK19 OPN3 NEK7 BRAF CCK MAPK14 HIPK3 DCLK1 PPP1CA EFNA1 GNPTG IGSF10 CDK7 SNRK TAOK1 STK17B CSPG4
intracellular signaling pathway	52/539 9.6%	4.2636e-11	BCAR3 ITK LRRK1 TRP63 BRCA2 NRGN RGS6 DUSP4 EDN1 WSB1 F2R RHOF RHOA RHOB TIAM1 ZAP70 IFNG MADD ARHGEF3 SIK2 ARHGEF7 RAF1 ARL8B RAB5B ADCYAP1R1 ROCK2 PXN ASB13 AGAP1 KALRN GALR1 RAB23 CHN1 SOCS7 PAG1 MAP4K4 P2RY12 STAT5A STAT5B RAB4A NOS2 BRAF NFATC1 MAPK14 DCLK1 EFNA1 DNMBP STK17B KLF9 CSPG4 RGL1 PLCD1
macromolecule modification	63/539 11.6%	8.213e-11	EPHB6 ITK PGAP1 KDM1B LRRK1 AATK ZDHHC7 PPP1CB PPP3CA PIM1 PRKACA DUSP4 CSNK1G3 GPX1 PPP1R12A CAMK1D RIPK2 F2R FBXO15 TEX14 ZAP70 MELK IFNG MADD PIGK MTAP2 ALPK3 SIK2 RAF1 ROCK2 MTTP PXN NEDD4L RNF6 PIK3R1 KALRN ERBB2 STK38L MGAT2 METTL8 ST3GAL1 SOCS7 MAP4K4 STAT5A NTRK2 CDK19 OPN3 NEK7 BRAF CCK MLL5 MAPK14 HIPK3 DCLK1 PPP1CA EFNA1 GNPTG IGSF10 CDK7 SNRK TAOK1 STK17B CSPG4
protein amino acid phosphorylation	42/539 7.7%	9.3984e-11	EPHB6 ITK ROCK2 LRRK1 PXN AATK PIK3R1 KALRN ERBB2 PIM1 STK38L PRKACA MAP4K4 STAT5A CSNK1G3 NTRK2 CDK19 CAMK1D RIPK2 F2R NEK7 BRAF TEX14 CCK MAPK14 HIPK3 DCLK1 EFNA1 IGSF10 ZAP70 CDK7 SNRK MELK IFNG TAOK1 STK17B MADD MTAP2 CSPG4 ALPK3 SIK2 RAF1
localization	102/539 18.9%	1.0669e-10	PGAP1 CEP120 PLAT BEST3 LAPTM4B SLC39A6 FAM53A ATP6V1E1 SLC12A6 F2R KCNK15 GABRG3 GABRG2 SLC5A7 RBP2 PPP1R3C SLC9A8 RIN2 OSBP2 SLC45A4 SLC22A4 RAB5B MFI2 MTTP ITPR1 AGAP1 ABCB8 KALRN EPB41L5 CYP27B1 SNX4 ATP6V1H PACSIN1 STAT5A STAT5B RAB4A OSBPL3 NFATC1 DCLK1 SNAP91 GNPTG TCN2 NBEA HOOK2 KITL CSPG4 LRP12 RYR2 ITGAM KCNK9 DENND1A ICA1 BRCA2 PPP3CA GM2A MFSD3 SLC13A2 SEC13 EDN1 GPX1 ITGA4 SLC39A10 …
signaling	131/539 24.3%	1.1131e-10	EPHB6 GDE1 TRP63 PLAT RBPJ GLS OLFR681 RGS6 OLFR160 TLE3 CSNK1G3 WSB1 IL1R1 F2R VMN1R21 GABRG3 GABRG2 OLFR677 SLC5A7 OLFR676 TIAM1 OLFR675 MADD VMN2R66 SIK2 RAF1 RIN2 ARL8B RAB5B ADCYAP1R1 PDE1A PXN ITPR1 AGAP1 LTBP2 OLFR1436 PIK3R1 KALRN LTBP1 CD79B OLFR624 OLFR107 ATXN1 GALR1 OLFR10 SRGAP3 SOCS7 PAG1 PACSIN1 STAT5A STAT5B RAB4A JAG1 EGR3 OPN3 GPR98 BRAF NFATC1 SMAD6 DCLK1 SNAP91 ARHGAP24 EFNA1 …
positive regulation of biological process	80/539 14.8%	1.4424e-10	ATF1 TRP63 NENF RBPJ LRRC32 BRCA2 CASP7 HEY2 SH3PXD2B ME1 PRKACA PHLDA1 RGS6 CCR2 DFFA EDN1 GPX1 RIPK2 F2R RBM19 DIO3 PDCD1LG2 RUNX2 RHOA FOXP1 RHOB RGMA F7 TIAM1 ZAP70 IFNG TLR6 CD47 EEF1E1 CD44 IDO1 ADCYAP1R1 SMARCD3 HLF SHMT2 ROCK2 RNF6 PIK3R1 HMGCR PLD1 RTN4 ARNTL DLL3 CD79B EPB41L5 HMBOX1 ATXN1 ERBB2 PPARGC1A P2RY12 STAT5A NTRK2 STAT5B WWTR1 NPM1 ACE NDFIP1 JAG1 ANGPT2 DSTN BRAF NFATC1 CCK M…
negative regulation of cellular process	68/539 12.6%	1.5346e-10	BTG3 UCMA TRP63 RBPJ LRRC32 IFI30 BRCA2 PPP3CA TRPS1 PRKACA RGS6 EDN1 GPX1 F2R PDCD1LG2 DYNLL1 RUNX2 RHOA SAP30 FOXP1 RHOB NPC1 IFNG MTAP2 LCOR MTAP4 EEF1E1 CD44 IDO1 ADCYAP1R1 RNF6 PIK3R1 RTN4 DLL3 EPB41L5 BCL2L10 ATXN1 DNAJB6 TMEM67 RAB23 NRIP2 ERBB2 HESX1 SOCS7 PAG1 SCAI PACSIN1 CLASP2 STAT5A STAT5B WWTR1 PRNP NPM1 NDFIP1 JAG1 ANGPT2 BCL11A BRAF MLL5 PBX1 HIPK3 TBX2 KITL NFIB TRIM35 CTNNB1 GHR…
negative regulation of biological process	73/539 13.5%	2.21e-10	BTG3 UCMA TRP63 RBPJ LRRC32 IFI30 BRCA2 BEST3 THBD PPP3CA TRPS1 PRKACA RGS6 CCR2 EDN1 GPX1 F2R PDCD1LG2 DYNLL1 RUNX2 RHOA SAP30 FOXP1 RHOB NPC1 IFNG MTAP2 LCOR MTAP4 EEF1E1 CD44 IDO1 ADCYAP1R1 NEDD4L RNF6 PIK3R1 RTN4 DLL3 EPB41L5 BCL2L10 ATXN1 DNAJB6 TMEM67 RAB23 NRIP2 ERBB2 HESX1 SOCS7 PAG1 SCAI PACSIN1 CLASP2 STAT5A STAT5B WWTR1 PRNP NPM1 NDFIP1 JAG1 ANGPT2 BCL11A BRAF CCK MLL5 PBX1 HIPK3 TBX2 …
post-translational protein modification	54/539 10.0%	3.0903e-10	EPHB6 ITK KDM1B LRRK1 AATK PPP1CB PPP3CA PIM1 PRKACA DUSP4 CSNK1G3 GPX1 PPP1R12A CAMK1D RIPK2 F2R FBXO15 TEX14 ZAP70 MELK IFNG MADD MTAP2 ALPK3 SIK2 RAF1 ROCK2 PXN RNF6 PIK3R1 KALRN ERBB2 STK38L METTL8 SOCS7 MAP4K4 STAT5A NTRK2 CDK19 OPN3 NEK7 BRAF CCK MAPK14 HIPK3 DCLK1 PPP1CA EFNA1 IGSF10 CDK7 SNRK TAOK1 STK17B CSPG4
anatomical structure morphogenesis	59/539 10.9%	6.1393e-10	TRP63 RBPJ KIF5C HEY2 PRKACA EDN1 MKKS GPX1 ITGA4 SHROOM3 RUNX2 RHOA ERMN RHOB RGMA UGDH COL4A1 COL8A2 CD44 GAS7 SMARCD3 HLF PXN KALRN RTN4 ZFP36L1 DLL3 EPB41L5 DNAJB6 TMEM67 RAB23 ERBB2 HESX1 STAT5A NTRK2 WWTR1 NPM1 ACE JAG1 ANGPT2 NOS2 NFATC1 CCK MAPK14 PBX1 DCLK1 SNAP91 ARHGAP24 TBX2 PPP1CA EXT1 EFNA1 IGSF10 NFASC COL5A1 CTNNB1 CSPG4 CKLF PLCD1
organ development	73/539 13.5%	1.0226e-09	PGAP1 HSP90AB1 CEP120 TRP63 RBPJ BRCA2 PPP3CA CASP7 HEY2 PRKACA CCR2 EDN1 MKKS GPX1 ITGA4 RPL22 F2R SHROOM3 RUNX2 RHOA FOXP1 RHOB RGMA ZAP70 ACTA1 COL4A1 MSH4 LY6D COL8A2 ALPK3 CD44 SMARCD3 HLF FECH PIK3R1 CLCN2 RTN4 ZFP36L1 DLL3 EPB41L5 DNAJB6 ERBB2 HESX1 METTL8 STAT5A ANGPT4 NTRK2 STAT5B WWTR1 NPM1 JAG1 ANGPT2 NOS2 BCL11A GPR98 NFATC1 MLL5 MAPK14 PBX1 DCLK1 ARHGAP24 TBX2 PPP1CA EXT1 EFNA1 IGSF1…
nitrogen compound metabolic process	108/539 20.0%	1.6626e-09	ATF1 KDM1B ZBTB20 TRP63 TSEN2 GLS THG1L PAPOLG ATP6V1E1 RPP38 TLE3 GLCE DIO3 CDC40 RUNX2 SAP30 FOXP1 SLC5A7 MSH4 GEMIN6 SNRPF IDO1 SLC22A4 RAB5B KHDRBS3 FECH SHMT2 PDE1A AGAP1 PRPF8 ZFP36L1 HMBOX1 NEUROD6 HESX1 ATP6V1H PPARGC1A SCAI STAT5A STAT5B WWTR1 PRNP RAB4A EGR3 BCL11A TRIP4 NFATC1 FOXN3 MLL5 SMAD6 PBX1 GLUD1 CDK7 HNRNPF TAF4B RBM28 PHTF2 RBM26 TSEN15 CELF2 LRRK1 CELF4 PPWD1 BRCA2 NOB1 HEY2…
cellular nitrogen compound metabolic process	105/539 19.4%	3.2486e-09	ATF1 KDM1B ZBTB20 TRP63 TSEN2 GLS THG1L PAPOLG ATP6V1E1 RPP38 TLE3 CDC40 RUNX2 SAP30 FOXP1 SLC5A7 MSH4 GEMIN6 SNRPF IDO1 SLC22A4 RAB5B KHDRBS3 FECH SHMT2 PDE1A AGAP1 PRPF8 ZFP36L1 HMBOX1 NEUROD6 HESX1 ATP6V1H PPARGC1A SCAI STAT5A STAT5B WWTR1 PRNP RAB4A EGR3 BCL11A TRIP4 NFATC1 FOXN3 MLL5 SMAD6 PBX1 GLUD1 CDK7 HNRNPF TAF4B RBM28 PHTF2 RBM26 TSEN15 CELF2 LRRK1 CELF4 PPWD1 BRCA2 NOB1 HEY2 ME1 RBM17…
regulation of metabolic process	104/539 19.2%	5.187e-09	ATF1 KDM1B ZBTB20 TRP63 RBPJ IFI30 PPP1CB PRKACA TBC1D10A TMPO TLE3 F2R RUNX2 SAP30 FOXP1 PPP1R3C MADD ADCYAP1R1 KHDRBS3 TBC1D9B FECH PXN AGAP1 PIK3R1 ZFP36L1 EPB41L5 HMBOX1 ATXN1 NEUROD6 GALR1 HESX1 PPARGC1A SCAI STAT5A STAT5B WWTR1 NDFIP1 EGR3 BCL11A TRIP4 NFATC1 FOXN3 MLL5 SMAD6 PBX1 EFNA1 CDK7 KITL TAF4B CSPG4 PHTF2 LRRC32 BRCA2 TRPS1 HEY2 ME1 PHACTR1 DUSP4 EDN1 TSC22D1 RIPK2 ARAP2 DYNLL1 RHO…
regulation of cellular metabolic process	99/539 18.3%	6.8615e-09	ATF1 KDM1B ZBTB20 TRP63 RBPJ PPP1CB PRKACA TBC1D10A TMPO TLE3 F2R RUNX2 SAP30 FOXP1 PPP1R3C MADD ADCYAP1R1 KHDRBS3 TBC1D9B FECH PXN AGAP1 PIK3R1 ZFP36L1 HMBOX1 ATXN1 NEUROD6 GALR1 HESX1 PPARGC1A SCAI STAT5A STAT5B WWTR1 NDFIP1 EGR3 BCL11A TRIP4 NFATC1 FOXN3 MLL5 SMAD6 PBX1 EFNA1 CDK7 KITL TAF4B CSPG4 PHTF2 BRCA2 TRPS1 HEY2 ME1 PHACTR1 DUSP4 EDN1 TSC22D1 RIPK2 ARAP2 DYNLL1 RHOA RGMA ETV6 TBC1D2 NP…
blood vessel morphogenesis	22/539 4.0%	1.104e-08	NTRK2 EDN1 NPM1 GPX1 ANGPT2 HLF ITGA4 NOS2 RBPJ MAPK14 RTN4 ARHGAP24 RHOB ZFP36L1 EFNA1 COL4A1 HEY2 COL8A2 CTNNB1 CSPG4 CKLF PLCD1
positive regulation of cellular process	69/539 12.8%	1.3073e-08	ATF1 TRP63 NENF RBPJ BRCA2 CASP7 HEY2 SH3PXD2B ME1 PHLDA1 RGS6 CCR2 DFFA EDN1 GPX1 RIPK2 F2R PDCD1LG2 RUNX2 RHOA FOXP1 RGMA TIAM1 ZAP70 IFNG TLR6 CD47 EEF1E1 CD44 IDO1 ADCYAP1R1 SMARCD3 HLF SHMT2 ROCK2 RNF6 PIK3R1 PLD1 RTN4 ARNTL DLL3 EPB41L5 HMBOX1 ATXN1 ERBB2 PPARGC1A STAT5A NTRK2 STAT5B WWTR1 NPM1 ACE JAG1 DSTN BRAF NFATC1 CCK MAPK14 PBX1 GLUD1 KITL NFIB TAOK1 STK17B TRIM35 CTNNB1 GHRL CKLF PL…
regulation of developmental process	43/539 7.9%	2.1381e-08	ATF1 UCMA TRP63 RNF6 PIK3R1 HMGCR RBPJ KALRN RTN4 DLL3 EPB41L5 HEY2 SH3PXD2B ERBB2 RGS6 CCR2 STAT5A NTRK2 STAT5B WWTR1 NPM1 ACE NDFIP1 JAG1 ANGPT2 RIPK2 RBM19 SHROOM3 CCK MAPK14 PBX1 RUNX2 RHOA ERMN RHOB EFNA1 TIAM1 ZAP70 IFNG KITL CTNNB1 GHRL GAS7
response to stimulus	92/539 17.0%	2.1672e-08	RYR2 ITGAM HSP90AB1 LRRK1 TRP63 HSPB1 PLAT RBPJ BRCA2 GLS THBD PPP3CA AS3MT CASP7 GM2A ME1 PRKACA CCR2 EDN1 MKKS GPX1 RIPK2 IL1R1 F2R VMN1R21 SORD GABRG3 GABRG2 RHOA FOXP1 RAD51B F7 ZAP70 OLFR998 IFNG MSH4 CHST1 SIK2 TLR6 CD47 EEF1E1 RAF1 CD44 IDO1 NLRP1A HLF FECH ITPR1 ETFDH PIK3R1 HMGCR PLD1 EPB41L5 CYP27B1 ATXN1 CCL6 OLFR10 ERBB2 SOCS7 PAG1 MAP4K4 P2RY12 STAT5A NTRK2 STAT5B PRNP NPM1 ACE OPN3 …
intracellular signal transduction	37/539 6.8%	2.7296e-08	BCAR3 RAB5B ADCYAP1R1 ROCK2 LRRK1 PXN AGAP1 NRGN GALR1 RAB23 MAP4K4 DUSP4 P2RY12 STAT5A STAT5B RAB4A EDN1 NOS2 F2R BRAF RHOF MAPK14 RHOA RHOB EFNA1 TIAM1 ZAP70 IFNG STK17B MADD CSPG4 SIK2 RGL1 ARHGEF7 RAF1 PLCD1 ARL8B
nucleobase, nucleoside, nucleotide and nucleic acid metabolic process	96/539 17.8%	3.5607e-08	ATF1 RBM28 PHTF2 RBM26 KDM1B TSEN15 CELF2 LRRK1 CELF4 ZBTB20 PPWD1 TRP63 TSEN2 BRCA2 THG1L NOB1 PAPOLG HEY2 ME1 ATP6V1E1 RPP38 TLE3 RBM17 DFFA TSC22D1 URAD DYNLL1 CDC40 RUNX2 RHOA SAP30 FOXP1 ETV6 RAD51B DBF4 MSH4 LCOR GEMIN6 SNRPF ZFP410 EEF1E1 ZMYND11 RAB5B KHDRBS3 SMARCD3 HLF PDE1A AGAP1 HMGCR NT5C2 NR2C2 PRPF8 NT5C3 ARNTL2 ARNTL ZFP36L1 HMBOX1 GNG3 NEUROD6 NRIP2 ERBB2 HESX1 ATP6V1H PPARGC1A S…
positive regulation of developmental process	27/539 5.0%	5.2952e-08	PIK3R1 HMGCR RTN4 DLL3 EPB41L5 HEY2 SH3PXD2B RGS6 STAT5A STAT5B NPM1 ACE JAG1 ANGPT2 RIPK2 RBM19 CCK MAPK14 RUNX2 RHOA RHOB TIAM1 ZAP70 IFNG KITL CTNNB1 GHRL
signaling pathway	107/539 19.8%	5.9608e-08	EPHB6 GDE1 TRP63 PLAT RBPJ OLFR681 RGS6 OLFR160 TLE3 CSNK1G3 WSB1 IL1R1 F2R VMN1R21 GABRG3 GABRG2 OLFR677 OLFR676 TIAM1 OLFR675 MADD VMN2R66 SIK2 RAF1 ARL8B RAB5B ADCYAP1R1 PXN AGAP1 LTBP2 OLFR1436 PIK3R1 KALRN LTBP1 CD79B OLFR624 OLFR107 GALR1 OLFR10 SOCS7 PAG1 STAT5A STAT5B RAB4A JAG1 OPN3 GPR98 BRAF NFATC1 SMAD6 DCLK1 EFNA1 IGSF10 DNMBP NSG2 CSPG4 GNB5 RGL1 BCAR3 ITK ITGAM LRRK1 BRCA2 NRGN OLF…
regulation of cellular component organization	30/539 5.5%	6.2969e-08	ATF1 RAB5B ROCK2 RNF6 KALRN RTN4 EPB41L5 TMEM67 STK38L PACSIN1 CLASP2 NTRK2 RAB4A NPM1 DSTN SHROOM3 CCK ARPC5 TUBG1 SNAP91 RHOA ERMN EFNA1 TIAM1 COL5A1 MTAP2 MTAP4 GHRL CD47 GAS7
blood vessel development	23/539 4.2%	6.3639e-08	NTRK2 EDN1 NPM1 GPX1 ANGPT2 HLF ITGA4 NOS2 RBPJ MAPK14 RTN4 ARHGAP24 RHOB ZFP36L1 EFNA1 COL5A1 COL4A1 HEY2 COL8A2 CTNNB1 CSPG4 CKLF PLCD1
cellular component organization	76/539 14.1%	7.5037e-08	ATF1 KDM1B DENND1A CELF2 CEP120 CELF4 RBPJ BRCA2 CASP7 ADAMTSL4 SGCB KIF5C HMGN3 ACADS PRND SUN2 DFFA MKKS F2R SHROOM3 TUBG1 RHOA ERMN NPC1 MSH4 MTAP2 GEMIN6 CD47 RAF1 RIN2 CD44 GAS7 ARL8B RAB5B SMARCD3 HLF FECH CAB39 SHMT2 ROCK2 CTTNBP2 PXN KALRN RTN4 EPB41L5 TMEM67 ERBB2 SH3BP4 METTL8 PPARGC1A PACSIN1 CLASP2 PEX16 WWTR1 PRNP NPM1 GPR98 BRAF NFATC1 CCK MLL5 MAPK14 DCLK1 SNAP91 EXT1 NFASC TTC8 CO…
nervous system development	48/539 8.9%	1.1318e-07	ATF1 PCSK2 PGAP1 SMARCD3 CEP120 TRP63 RNF6 RBPJ BRCA2 KALRN RTN4 DLL3 NEUROD6 KIF5C RAB23 ERBB2 HESX1 RGS6 NTRK2 NPM1 MKKS ACE JAG1 EGR3 GPR98 SHROOM3 CCK PBX1 DCLK1 SNAP91 RHOA RGMA EXT1 EFNA1 TIAM1 NFASC IFNG NFIB MTAP2 CTNNB1 CSPG4 GHRL ARHGEF7 MDGA1 PPIA SERINC5 CD44 GAS7
regulation of T cell proliferation	12/539 2.2%	1.2337e-07	STAT5A STAT5B ZAP70 NDFIP1 IFNG RIPK2 ERBB2 CTNNB1 CCK PDCD1LG2 LRRC32 IDO1
vasculature development	23/539 4.2%	1.2953e-07	NTRK2 EDN1 NPM1 GPX1 ANGPT2 HLF ITGA4 NOS2 RBPJ MAPK14 RTN4 ARHGAP24 RHOB ZFP36L1 EFNA1 COL5A1 COL4A1 HEY2 COL8A2 CTNNB1 CSPG4 CKLF PLCD1
gene expression	83/539 15.3%	1.3824e-07	ATF1 PCSK2 RBM28 PHTF2 RBM26 KDM1B TSEN15 CELF2 CELF4 ZBTB20 PPWD1 TRP63 TSEN2 THG1L EFTUD1 NOB1 PAPOLG HEY2 ME1 RPLP2 RPP38 TLE3 RBM17 TSC22D1 RPL22 DYNLL1 PRSS12 CDC40 RUNX2 SAP30 FOXP1 ETV6 LCOR GEMIN6 SNRPF ZFP410 EEF1E1 ZMYND11 KHDRBS3 SMARCD3 HLF RPS27L NR2C2 MRPL13 PRPF8 ARNTL2 ARNTL HMBOX1 NEUROD6 NRIP2 ERBB2 HESX1 AGA PPARGC1A SCAI STAT5A STAT5B WWTR1 SKOR2 EGR3 BCL11A FOXJ2 TRIP4 NFATC1…
regulation of multicellular organismal process	50/539 9.2%	1.5521e-07	ATF1 UCMA ICA1 TRP63 LRRC32 GLS THBD PPP3CA HEY2 PRKACA RGS6 CCR2 EDN1 RIPK2 F2R RBM19 DIO3 RUNX2 RHOA RHOB F7 TIAM1 ZAP70 IFNG IDO1 HLF RNF6 PIK3R1 HMGCR KALRN RTN4 DLL3 EPB41L5 ERBB2 STAT5A NTRK2 STAT5B NPM1 ACE NDFIP1 JAG1 ANGPT2 NOS2 CCK MAPK14 PBX1 EFNA1 KITL CTNNB1 GHRL
nucleic acid metabolic process	83/539 15.3%	2.8448e-07	ATF1 RBM28 PHTF2 RBM26 KDM1B TSEN15 CELF2 LRRK1 CELF4 ZBTB20 PPWD1 TRP63 TSEN2 BRCA2 THG1L NOB1 PAPOLG HEY2 ME1 RPP38 TLE3 RBM17 DFFA TSC22D1 DYNLL1 CDC40 RUNX2 SAP30 FOXP1 ETV6 RAD51B DBF4 MSH4 LCOR GEMIN6 SNRPF ZFP410 EEF1E1 ZMYND11 KHDRBS3 SMARCD3 HLF NR2C2 PRPF8 ARNTL2 ARNTL ZFP36L1 HMBOX1 NEUROD6 NRIP2 ERBB2 HESX1 PPARGC1A SCAI STAT5A STAT5B WWTR1 SKOR2 EGR3 BCL11A FOXJ2 TRIP4 NFATC1 FOXN3 M…
regulation of localization	37/539 6.8%	3.0974e-07	RAB5B ADCYAP1R1 CEP120 ICA1 NEDD4L PIK3R1 LRRC32 PLD1 BEST3 CLCN2 RTN4 EPB41L5 PPP3CA ENSA PRKACA SCAI CCR2 PACSIN1 P2RY12 NTRK2 STAT5B RAB4A EDN1 NPM1 MKKS ACE PPP1R12A F2R HTR3A SNAP91 RHOA EFNA1 GLUD1 IFNG GHRL CD47 PLCD1
regulation of biological quality	56/539 10.3%	3.8004e-07	PCSK2 TXNDC11 TRP63 IFI30 BRCA2 THBD PPP3CA PRND CCR2 EDN1 MKKS GPX1 F2R EMP1 DIO3 SHROOM3 RHOA ERMN SLC5A7 F7 IFNG SLC9A8 TLR6 GAS7 HLF FECH MFI2 MTTP ITPR1 RNF6 RTN4 GNG3 ATXN1 ERBB2 P2RY12 STAT5A STAT5B PRNP NPM1 ACE SERPIND1 NOS2 TFPI2 RANBP9 DSTN CCK ARPC5 MLL5 DCLK1 SNAP91 SLC8A3 CPE CTNNB1 GHRL PLCD1 SERINC5
signal transmission via phosphorylation event	21/539 3.8%	5.2579e-07	DUSP4 P2RY12 STAT5A STAT5B EDN1 NOS2 F2R PXN BRAF MAPK14 RHOA NRGN EFNA1 ZAP70 IFNG STK17B MADD CSPG4 SIK2 RAF1 MAP4K4
intracellular protein kinase cascade	21/539 3.8%	5.2579e-07	DUSP4 P2RY12 STAT5A STAT5B EDN1 NOS2 F2R PXN BRAF MAPK14 RHOA NRGN EFNA1 ZAP70 IFNG STK17B MADD CSPG4 SIK2 RAF1 MAP4K4
regulation of cell differentiation	32/539 5.9%	6.3971e-07	ATF1 UCMA TRP63 RNF6 PIK3R1 RBPJ KALRN RTN4 DLL3 EPB41L5 SH3PXD2B ERBB2 RGS6 STAT5A NTRK2 STAT5B WWTR1 ACE NDFIP1 JAG1 RIPK2 CCK MAPK14 PBX1 RUNX2 RHOA EFNA1 TIAM1 ZAP70 IFNG KITL CTNNB1
angiogenesis	16/539 2.9%	7.8634e-07	EDN1 GPX1 ANGPT2 HLF RBPJ MAPK14 RTN4 ARHGAP24 RHOB EFNA1 COL4A1 COL8A2 CTNNB1 CSPG4 CKLF PLCD1
establishment of localization	82/539 15.2%	9.4496e-07	RYR2 PGAP1 KCNK9 DENND1A ICA1 BRCA2 BEST3 LAPTM4B PPP3CA GM2A MFSD3 SLC39A6 FAM53A ATP6V1E1 SLC12A6 SLC13A2 SEC13 EDN1 F2R SLC39A10 KCNK15 HTR3A HTR3B DYNLL1 GABRG3 GABRG2 RHOB SLC5A7 RBP2 NPC1 PPP1R3C SLC9A8 CD47 TMEM9 SEC22B RIN2 OSBP2 SLC45A4 SLC22A4 NAPB RAB5B MFI2 MTTP ITPR1 ETFDH AGAP1 ABCB8 SLC3A2 UQCR10 KALRN CLCN2 ARNTL AP3M2 SLC25A26 CYP27B1 SNX4 RAB23 SH3BP4 ATP6V1H PACSIN1 PEX16 NTRK2…
regulation of leukocyte proliferation	13/539 2.4%	9.7038e-07	STAT5A STAT5B NDFIP1 RIPK2 CCK PDCD1LG2 LRRC32 ZAP70 IFNG KITL ERBB2 CTNNB1 IDO1
transport	81/539 15.0%	1.3543e-06	RYR2 PGAP1 KCNK9 DENND1A ICA1 BEST3 LAPTM4B PPP3CA GM2A MFSD3 SLC39A6 FAM53A ATP6V1E1 SLC12A6 SLC13A2 SEC13 EDN1 F2R SLC39A10 KCNK15 HTR3A HTR3B DYNLL1 GABRG3 GABRG2 RHOB SLC5A7 RBP2 NPC1 PPP1R3C SLC9A8 CD47 TMEM9 SEC22B RIN2 OSBP2 SLC45A4 SLC22A4 NAPB RAB5B MFI2 MTTP ITPR1 ETFDH AGAP1 ABCB8 SLC3A2 UQCR10 KALRN CLCN2 ARNTL AP3M2 SLC25A26 CYP27B1 SNX4 RAB23 SH3BP4 ATP6V1H PACSIN1 PEX16 NTRK2 RAB4A…
regulation of primary metabolic process	88/539 16.3%	1.6059e-06	ATF1 PHTF2 KDM1B ZBTB20 TRP63 RBPJ BRCA2 PPP1CB TRPS1 HEY2 ME1 TBC1D10A TMPO TLE3 EDN1 TSC22D1 RIPK2 ARAP2 DYNLL1 RUNX2 RHOA SAP30 FOXP1 RGMA ETV6 TBC1D2 PPP1R3C IFNG LCOR TLR6 ZFP410 ZMYND11 CD44 ADCYAP1R1 KHDRBS3 SMARCD3 TBC1D9B HLF FECH AGAP1 RNF6 PIK3R1 NR2C2 ARNTL2 ARNTL ZFP36L1 HMBOX1 ATXN1 DNAJB6 NEUROD6 GALR1 RAB23 NRIP2 ERBB2 HESX1 PPARGC1A SCAI STAT5A STAT5B WWTR1 NPM1 NDFIP1 SKOR2 EGR3…
anatomical structure formation involved in morphogenesis	26/539 4.8%	1.6059e-06	HLF TRP63 RBPJ RTN4 DLL3 EPB41L5 HESX1 PRKACA EDN1 NPM1 GPX1 ANGPT2 SHROOM3 MAPK14 ARHGAP24 TBX2 RHOB RGMA EFNA1 COL4A1 COL8A2 CTNNB1 CSPG4 CKLF PLCD1 CD44
positive regulation of cell differentiation	20/539 3.7%	3.8904e-06	STAT5A STAT5B ACE JAG1 RIPK2 CCK PIK3R1 MAPK14 RUNX2 RHOA RTN4 DLL3 EPB41L5 TIAM1 ZAP70 IFNG KITL SH3PXD2B CTNNB1 RGS6
cellular component movement	25/539 4.6%	3.8904e-06	ITGAM PXN PLAT EPB41L5 CCL6 KIF5C ERBB2 CTHRC1 CLASP2 NPM1 GPX1 ITGA4 DSTN CCK DCLK1 EXT1 NFASC IFNG KITL CSPG4 CD47 ARHGEF7 MDGA1 CKLF CD44
regulation of Ras protein signal transduction	16/539 2.9%	4.186e-06	TBC1D9B ARHGEF37 ARHGEF38 ARAP2 AGAP1 ARHGEF10L KALRN TIAM1 TBC1D2 DNMBP KITL ERBB2 ARHGEF3 ARHGEF7 TBC1D10A SCAI
cellular biosynthetic process	88/539 16.3%	4.7824e-06	ATF1 PHTF2 PGAP1 KDM1B ZBTB20 TRP63 ZDHHC7 BRCA2 EFTUD1 NFU1 PAPOLG HEY2 ME1 RPLP2 ATP6V1E1 PHLDA1 TLE3 TSC22D1 GLCE RPL22 URAD DYNLL1 RUNX2 SAP30 FOXP1 ETV6 SLC5A7 DBF4 PPP1R3C PIGK LCOR ZFP410 EEF1E1 ZMYND11 IDO1 KHDRBS3 SMARCD3 HLF FECH SHMT2 MTTP RPS27L HMGCR PLD1 NR2C2 MRPL13 ARNTL2 ARNTL HMBOX1 NEUROD6 NRIP2 ERBB2 HESX1 ATP6V1H MGAT2 ST3GAL1 PPARGC1A SCAI STAT5A STAT5B WWTR1 SKOR2 EGR3 NOS2…
biosynthetic process	90/539 16.6%	5.2644e-06	ATF1 PHTF2 PGAP1 KDM1B ZBTB20 TRP63 ZDHHC7 BRCA2 EFTUD1 NFU1 PAPOLG HEY2 ME1 RPLP2 ATP6V1E1 PHLDA1 TLE3 TSC22D1 GLCE RPL22 URAD DIO3 DYNLL1 RUNX2 SAP30 FOXP1 ETV6 SLC5A7 DBF4 PPP1R3C PIGK LCOR ZFP410 EEF1E1 ZMYND11 IDO1 KHDRBS3 SMARCD3 HLF FECH SHMT2 MTTP RPS27L HMGCR PLD1 NR2C2 MRPL13 ARNTL2 ARNTL CYB5R1 HMBOX1 NEUROD6 NRIP2 ERBB2 HESX1 ATP6V1H MGAT2 ST3GAL1 PPARGC1A SCAI STAT5A STAT5B WWTR1 SKO…
regulation of mononuclear cell proliferation	12/539 2.2%	5.6529e-06	STAT5A STAT5B ZAP70 NDFIP1 IFNG RIPK2 ERBB2 CTNNB1 CCK PDCD1LG2 LRRC32 IDO1
regulation of lymphocyte proliferation	12/539 2.2%	5.6529e-06	STAT5A STAT5B ZAP70 NDFIP1 IFNG RIPK2 ERBB2 CTNNB1 CCK PDCD1LG2 LRRC32 IDO1
cellular macromolecule biosynthetic process	73/539 13.5%	6.166e-06	ATF1 PHTF2 PGAP1 KDM1B ZBTB20 TRP63 ZDHHC7 BRCA2 EFTUD1 PAPOLG HEY2 ME1 RPLP2 PHLDA1 TLE3 TSC22D1 GLCE RPL22 DYNLL1 RUNX2 SAP30 FOXP1 ETV6 DBF4 PPP1R3C PIGK LCOR ZFP410 EEF1E1 ZMYND11 KHDRBS3 SMARCD3 HLF MTTP RPS27L NR2C2 MRPL13 ARNTL2 ARNTL HMBOX1 NEUROD6 NRIP2 ERBB2 HESX1 MGAT2 ST3GAL1 PPARGC1A SCAI STAT5A STAT5B WWTR1 SKOR2 EGR3 BCL11A FOXJ2 TRIP4 NFATC1 FOXN3 MLL5 SMAD6 KLF3 PBX1 HIPK3 TBX2 G…
regulation of T cell activation	13/539 2.4%	6.4694e-06	STAT5A STAT5B NDFIP1 RIPK2 CCK PDCD1LG2 LRRC32 ZAP70 IFNG ERBB2 CTNNB1 PAG1 IDO1
neurogenesis	34/539 6.3%	6.4694e-06	ATF1 CEP120 RNF6 RBPJ KALRN RTN4 DLL3 KIF5C ERBB2 RGS6 NTRK2 NPM1 ACE JAG1 GPR98 CCK PBX1 DCLK1 SNAP91 RHOA EXT1 EFNA1 TIAM1 NFASC IFNG MTAP2 CTNNB1 CSPG4 GHRL ARHGEF7 MDGA1 PPIA CD44 GAS7
regulation of nucleobase, nucleoside, nucleotide and nucleic acid metabolic process	76/539 14.1%	6.4694e-06	ATF1 PHTF2 KDM1B ZBTB20 TRP63 RBPJ BRCA2 TRPS1 HEY2 ME1 TBC1D10A TMPO TLE3 EDN1 TSC22D1 RIPK2 ARAP2 DYNLL1 RUNX2 RHOA SAP30 FOXP1 ETV6 TBC1D2 IFNG LCOR ZFP410 ZMYND11 ADCYAP1R1 KHDRBS3 SMARCD3 TBC1D9B HLF AGAP1 RNF6 NR2C2 ARNTL2 ARNTL ZFP36L1 HMBOX1 ATXN1 DNAJB6 NEUROD6 GALR1 NRIP2 ERBB2 HESX1 PPARGC1A SCAI STAT5A STAT5B WWTR1 NPM1 NDFIP1 SKOR2 EGR3 BCL11A FOXJ2 TRIP4 NFATC1 CCK FOXN3 MLL5 SMAD6 …
regulation of response to stimulus	26/539 4.8%	6.4694e-06	FECH RTN4 CD79B CCR2 STAT5A STAT5B NPM1 ACE NDFIP1 GPX1 RIPK2 F2R CCK HIPK3 FOXP1 F7 ZAP70 NPC1 IFNG GHRL SIK2 TLR6 CD47 EEF1E1 CD44 IDO1
regulation of response to stress	19/539 3.5%	6.4694e-06	STAT5A STAT5B NPM1 ACE NDFIP1 GPX1 FECH RIPK2 F2R CCK HIPK3 RTN4 F7 NPC1 TLR6 CD47 EEF1E1 CD44 IDO1
macromolecule biosynthetic process	73/539 13.5%	6.8688e-06	ATF1 PHTF2 PGAP1 KDM1B ZBTB20 TRP63 ZDHHC7 BRCA2 EFTUD1 PAPOLG HEY2 ME1 RPLP2 PHLDA1 TLE3 TSC22D1 GLCE RPL22 DYNLL1 RUNX2 SAP30 FOXP1 ETV6 DBF4 PPP1R3C PIGK LCOR ZFP410 EEF1E1 ZMYND11 KHDRBS3 SMARCD3 HLF MTTP RPS27L NR2C2 MRPL13 ARNTL2 ARNTL HMBOX1 NEUROD6 NRIP2 ERBB2 HESX1 MGAT2 ST3GAL1 PPARGC1A SCAI STAT5A STAT5B WWTR1 SKOR2 EGR3 BCL11A FOXJ2 TRIP4 NFATC1 FOXN3 MLL5 SMAD6 KLF3 PBX1 HIPK3 TBX2 G…
regulation of macromolecule metabolic process	83/539 15.3%	7.9964e-06	ATF1 PHTF2 KDM1B ZBTB20 TRP63 RBPJ LRRC32 IFI30 BRCA2 PPP1CB TRPS1 HEY2 ME1 TMPO TLE3 TSC22D1 RIPK2 DYNLL1 RUNX2 RHOA SAP30 FOXP1 RGMA ETV6 PPP1R3C IFNG LCOR TLR6 ZFP410 ZMYND11 CD44 KHDRBS3 SMARCD3 HLF FECH RNF6 PIK3R1 NR2C2 ARNTL2 ARNTL ZFP36L1 EPB41L5 HMBOX1 ATXN1 DNAJB6 NEUROD6 RAB23 NRIP2 ERBB2 HESX1 PPARGC1A SCAI STAT5A STAT5B WWTR1 NPM1 NDFIP1 SKOR2 EGR3 NOS2 BCL11A FOXJ2 TRIP4 RANBP9 NFAT…
regulation of small GTPase mediated signal transduction	17/539 3.1%	8.0112e-06	TBC1D9B ARHGEF37 ARHGEF38 ARAP2 AGAP1 ARHGEF10L KALRN TIAM1 TBC1D2 DNMBP KITL ERBB2 ARHGEF3 RGL1 ARHGEF7 TBC1D10A SCAI
signal transmission	97/539 17.9%	8.0614e-06	PLAT GLS OLFR681 RGS6 OLFR160 IL1R1 F2R VMN1R21 GABRG3 GABRG2 OLFR677 SLC5A7 OLFR676 TIAM1 OLFR675 MADD VMN2R66 SIK2 RAF1 RIN2 ARL8B RAB5B ADCYAP1R1 PDE1A PXN ITPR1 AGAP1 OLFR1436 PIK3R1 OLFR624 OLFR107 ATXN1 GALR1 OLFR10 SRGAP3 PACSIN1 STAT5A STAT5B RAB4A EGR3 OPN3 GPR98 BRAF SNAP91 ARHGAP24 EFNA1 CSPG4 GNB5 RGL1 SERINC5 BCAR3 LRRK1 NRGN PPP3CA OLFR887 OLFR883 CCR2 DUSP4 EDN1 ARAP2 HTR3A HTR3B R…
signaling process	97/539 17.9%	8.0875e-06	PLAT GLS OLFR681 RGS6 OLFR160 IL1R1 F2R VMN1R21 GABRG3 GABRG2 OLFR677 SLC5A7 OLFR676 TIAM1 OLFR675 MADD VMN2R66 SIK2 RAF1 RIN2 ARL8B RAB5B ADCYAP1R1 PDE1A PXN ITPR1 AGAP1 OLFR1436 PIK3R1 OLFR624 OLFR107 ATXN1 GALR1 OLFR10 SRGAP3 PACSIN1 STAT5A STAT5B RAB4A EGR3 OPN3 GPR98 BRAF SNAP91 ARHGAP24 EFNA1 CSPG4 GNB5 RGL1 SERINC5 BCAR3 LRRK1 NRGN PPP3CA OLFR887 OLFR883 CCR2 DUSP4 EDN1 ARAP2 HTR3A HTR3B R…
regulation of nitrogen compound metabolic process	76/539 14.1%	9.5943e-06	ATF1 PHTF2 KDM1B ZBTB20 TRP63 RBPJ BRCA2 TRPS1 HEY2 ME1 TBC1D10A TMPO TLE3 EDN1 TSC22D1 RIPK2 ARAP2 DYNLL1 RUNX2 RHOA SAP30 FOXP1 ETV6 TBC1D2 IFNG LCOR ZFP410 ZMYND11 ADCYAP1R1 KHDRBS3 SMARCD3 TBC1D9B HLF AGAP1 RNF6 NR2C2 ARNTL2 ARNTL ZFP36L1 HMBOX1 ATXN1 DNAJB6 NEUROD6 GALR1 NRIP2 ERBB2 HESX1 PPARGC1A SCAI STAT5A STAT5B WWTR1 NPM1 NDFIP1 SKOR2 EGR3 BCL11A FOXJ2 TRIP4 NFATC1 CCK FOXN3 MLL5 SMAD6 …
response to stress	50/539 9.2%	9.7562e-06	HSP90AB1 LRRK1 TRP63 HSPB1 PLAT RBPJ BRCA2 THBD PPP3CA CCR2 EDN1 GPX1 RIPK2 IL1R1 F2R RHOA RAD51B F7 IFNG MSH4 CHST1 TLR6 EEF1E1 RAF1 CD44 IDO1 NLRP1A HLF ITPR1 ETFDH PLD1 ERBB2 MAP4K4 P2RY12 STAT5B PRNP NPM1 ARPP21 SERPIND1 NOS2 TFPI2 CCK MAPK14 USP28 HSPA12B IGSF10 EEPD1 ERCC4 ALOX5AP RAD1
cell development	34/539 6.3%	1.1028e-05	HLF TRP63 RBPJ BRCA2 NR2C2 KALRN RTN4 EPB41L5 PPP3CA KIF5C ERBB2 NTRK2 EDN1 NPM1 MKKS GPX1 GPR98 F2R SHROOM3 NFATC1 CCK RUNX2 DCLK1 SNAP91 EXT1 ACTA1 NFASC KITL MTAP2 CTNNB1 CSPG4 GHRL CD44 GAS7
cellular response to stimulus	34/539 6.3%	1.1648e-05	ITGAM HLF LRRK1 TRP63 PIK3R1 BRCA2 EPB41L5 PPP3CA AS3MT CCL6 PRKACA SOCS7 STAT5A STAT5B GPX1 OPN3 ARPP21 RIPK2 CCK MAPK14 USP28 RHOA SLC8A3 RAD51B EEPD1 IFNG ERCC4 MSH4 CTNNB1 RAD1 SIK2 TLR6 EEF1E1 CKLF
regulation of cellular biosynthetic process	76/539 14.1%	1.4322e-05	ATF1 PHTF2 KDM1B ZBTB20 TRP63 RBPJ BRCA2 PPP1CB TRPS1 HEY2 ME1 TMPO TLE3 EDN1 TSC22D1 RIPK2 DYNLL1 RUNX2 RHOA SAP30 FOXP1 ETV6 PPP1R3C IFNG LCOR ZFP410 ZMYND11 ADCYAP1R1 KHDRBS3 SMARCD3 HLF FECH RNF6 NR2C2 ARNTL2 ARNTL ZFP36L1 HMBOX1 ATXN1 DNAJB6 NEUROD6 GALR1 NRIP2 ERBB2 HESX1 PPARGC1A SCAI STAT5A STAT5B WWTR1 NPM1 SKOR2 EGR3 NOS2 BCL11A FOXJ2 TRIP4 NFATC1 CCK FOXN3 MLL5 SMAD6 MAPK14 KLF3 PBX1 H…
cell migration	19/539 3.5%	1.5991e-05	NPM1 ITGAM GPX1 ITGA4 PLAT CCK DCLK1 EPB41L5 IFNG KITL CCL6 CSPG4 CD47 ARHGEF7 MDGA1 CKLF CD44 CTHRC1 CLASP2
regulation of microtubule-based process	8/539 1.4%	1.75e-05	NPM1 MKKS ROCK2 TMEM67 CEP120 MTAP2 MTAP4 CLASP2
regulation of immune system process	23/539 4.2%	1.8476e-05	STAT5A STAT5B NDFIP1 JAG1 GPX1 RIPK2 CCK PIK3R1 PDCD1LG2 LRRC32 MAPK14 FOXP1 CD79B ZAP70 IFNG KITL ERBB2 CTNNB1 TLR6 PAG1 CD44 IDO1 CCR2
regulation of biosynthetic process	76/539 14.1%	1.9838e-05	ATF1 PHTF2 KDM1B ZBTB20 TRP63 RBPJ BRCA2 PPP1CB TRPS1 HEY2 ME1 TMPO TLE3 EDN1 TSC22D1 RIPK2 DYNLL1 RUNX2 RHOA SAP30 FOXP1 ETV6 PPP1R3C IFNG LCOR ZFP410 ZMYND11 ADCYAP1R1 KHDRBS3 SMARCD3 HLF FECH RNF6 NR2C2 ARNTL2 ARNTL ZFP36L1 HMBOX1 ATXN1 DNAJB6 NEUROD6 GALR1 NRIP2 ERBB2 HESX1 PPARGC1A SCAI STAT5A STAT5B WWTR1 NPM1 SKOR2 EGR3 NOS2 BCL11A FOXJ2 TRIP4 NFATC1 CCK FOXN3 MLL5 SMAD6 MAPK14 KLF3 PBX1 H…
regulation of macromolecule biosynthetic process	72/539 13.3%	3.2222e-05	ATF1 PHTF2 KDM1B ZBTB20 TRP63 RBPJ BRCA2 PPP1CB TRPS1 HEY2 ME1 TMPO TLE3 TSC22D1 RIPK2 DYNLL1 RUNX2 RHOA SAP30 FOXP1 ETV6 PPP1R3C IFNG LCOR ZFP410 ZMYND11 KHDRBS3 SMARCD3 HLF FECH RNF6 NR2C2 ARNTL2 ARNTL ZFP36L1 HMBOX1 ATXN1 DNAJB6 NEUROD6 NRIP2 ERBB2 HESX1 PPARGC1A SCAI STAT5A STAT5B WWTR1 NPM1 SKOR2 EGR3 NOS2 BCL11A FOXJ2 TRIP4 NFATC1 CCK FOXN3 MLL5 SMAD6 MAPK14 KLF3 PBX1 HIPK3 TBX2 PPP1CA CDK7…
generation of neurons	31/539 5.7%	3.4628e-05	ATF1 RNF6 RBPJ KALRN RTN4 DLL3 KIF5C ERBB2 RGS6 NTRK2 NPM1 ACE JAG1 GPR98 CCK PBX1 DCLK1 SNAP91 RHOA EXT1 EFNA1 TIAM1 NFASC IFNG MTAP2 CSPG4 GHRL MDGA1 PPIA CD44 GAS7
positive regulation of signal transduction	14/539 2.5%	3.5634e-05	GPX1 RIPK2 F2R BRAF CCK NENF ZAP70 IFNG KITL ERBB2 CTNNB1 TLR6 CD44 CCR2
positive regulation of signaling process	14/539 2.5%	4.1132e-05	GPX1 RIPK2 F2R BRAF CCK NENF ZAP70 IFNG KITL ERBB2 CTNNB1 TLR6 CD44 CCR2
regulation of transport	27/539 5.0%	4.3125e-05	RAB5B ADCYAP1R1 ICA1 NEDD4L LRRC32 BEST3 CLCN2 RTN4 PPP3CA ENSA PRKACA PACSIN1 P2RY12 NTRK2 RAB4A EDN1 NPM1 PPP1R12A F2R HTR3A SNAP91 RHOA GLUD1 IFNG GHRL CD47 PLCD1
regulation of gene expression	73/539 13.5%	4.3322e-05	ATF1 PHTF2 KDM1B ZBTB20 TRP63 RBPJ LRRC32 IFI30 TRPS1 HEY2 ME1 TMPO TLE3 TSC22D1 RIPK2 DYNLL1 RUNX2 RHOA SAP30 FOXP1 ETV6 IFNG LCOR ZFP410 ZMYND11 CD44 KHDRBS3 SMARCD3 HLF RNF6 NR2C2 ARNTL2 ARNTL ZFP36L1 EPB41L5 HMBOX1 ATXN1 DNAJB6 NEUROD6 NRIP2 ERBB2 HESX1 PPARGC1A SCAI STAT5A STAT5B WWTR1 NPM1 SKOR2 EGR3 NOS2 BCL11A FOXJ2 TRIP4 RANBP9 NFATC1 CCK FOXN3 MLL5 SMAD6 MAPK14 KLF3 PBX1 HIPK3 TBX2 PPP1…
tissue development	33/539 6.1%	4.3905e-05	TRP63 RBPJ RTN4 DLL3 EPB41L5 PPP3CA ERBB2 PRKACA METTL8 STAT5A ANGPT4 EDN1 NPM1 JAG1 GPX1 ANGPT2 F2R SHROOM3 NFATC1 MAPK14 PBX1 RUNX2 RHOA FOXP1 TBX2 RGMA EXT1 IGSF10 ACTA1 COL5A1 KITL CTNNB1 CD44
enzyme linked receptor protein signaling pathway	19/539 3.5%	5.0406e-05	EPHB6 STAT5A NTRK2 STAT5B ANGPT2 AKAP7 PLAT LTBP2 PIK3R1 SMAD6 LTBP1 EFNA1 IGSF10 TIAM1 ERBB2 CSPG4 SIK2 RAF1 SOCS7
cell activation	18/539 3.3%	5.4366e-05	P2RY12 STAT5A H60C STAT5B ITGAM RIPK2 BCL11A RPL22 CCK PIK3R1 RBPJ MLL5 NDRG1 FOXP1 ZAP70 LY6D CTNNB1 TLR6
leukocyte activation	17/539 3.1%	5.6785e-05	STAT5A H60C STAT5B ITGAM RIPK2 BCL11A RPL22 CCK PIK3R1 RBPJ MLL5 NDRG1 FOXP1 ZAP70 LY6D CTNNB1 TLR6
positive regulation of signaling pathway	16/539 2.9%	6.8406e-05	JAG1 GPX1 RIPK2 F2R BRAF CCK NENF ZAP70 IFNG KITL ERBB2 CTNNB1 TLR6 EEF1E1 CD44 CCR2
regulation of cell proliferation	31/539 5.7%	8.1219e-05	SHMT2 PDE1A TRP63 RBPJ LRRC32 IFI30 HEY2 ERBB2 STAT5A STAT5B EDN1 NPM1 NDFIP1 JAG1 NOS2 RIPK2 F2R CCK PDCD1LG2 PBX1 RUNX2 FOXP1 ZAP70 IFNG KITL NFIB TRIM35 CTNNB1 EEF1E1 PLCD1 IDO1
localization of cell	19/539 3.5%	9.1493e-05	NPM1 ITGAM GPX1 ITGA4 PLAT CCK DCLK1 EPB41L5 IFNG KITL CCL6 CSPG4 CD47 ARHGEF7 MDGA1 CKLF CD44 CTHRC1 CLASP2
cell motility	19/539 3.5%	9.1493e-05	NPM1 ITGAM GPX1 ITGA4 PLAT CCK DCLK1 EPB41L5 IFNG KITL CCL6 CSPG4 CD47 ARHGEF7 MDGA1 CKLF CD44 CTHRC1 CLASP2
regulation of response to external stimulus	14/539 2.5%	0.00010164	STAT5A STAT5B ACE NDFIP1 GPX1 F2R CCK RTN4 F7 NPC1 GHRL CD47 IDO1 CCR2
regulation of cellular response to stress	10/539 1.8%	0.00012014	NPM1 FECH NPC1 RIPK2 CCK TLR6 EEF1E1 HIPK3 CD44 RTN4
cell morphogenesis	20/539 3.7%	0.00012805	WWTR1 NPM1 MKKS NFATC1 CCK RBPJ MAPK14 KALRN DCLK1 SNAP91 RHOA RTN4 EXT1 EPB41L5 NFASC KIF5C TMEM67 ERBB2 CTNNB1 GAS7
transmembrane receptor protein tyrosine kinase signaling pathway	15/539 2.7%	0.00013332	EPHB6 STAT5A NTRK2 STAT5B ANGPT2 PLAT PIK3R1 EFNA1 IGSF10 TIAM1 ERBB2 CSPG4 SIK2 RAF1 SOCS7
positive regulation of intracellular protein kinase cascade	11/539 2.0%	0.00014304	GPX1 IFNG RIPK2 ERBB2 CTNNB1 BRAF CCK NENF TLR6 CD44 CCR2
positive regulation of T cell proliferation	7/539 1.2%	0.00015545	STAT5A STAT5B ZAP70 IFNG RIPK2 CCK PDCD1LG2
skeletal muscle tissue development	9/539 1.6%	0.00017018	PPP3CA ACTA1 GPX1 F2R ERBB2 METTL8 MAPK14 RHOA FOXP1
response to chemical stimulus	42/539 7.7%	0.00017125	RYR2 ITGAM HLF ITPR1 ETFDH PLAT PIK3R1 PLD1 EPB41L5 CYP27B1 PPP3CA AS3MT CCL6 ME1 PRKACA SOCS7 PAG1 STAT5A STAT5B PRNP EDN1 GPX1 NOS2 RIPK2 CMTM4 F2R VMN1R21 SORD BRAF CCK MAPK14 GABRG3 RHOA SLC8A3 IFNG CTNNB1 SIK2 TLR6 RAF1 CKLF PLCD1 IDO1
regulation of lymphocyte activation	13/539 2.4%	0.00017125	STAT5A STAT5B NDFIP1 RIPK2 CCK PDCD1LG2 LRRC32 ZAP70 IFNG ERBB2 CTNNB1 PAG1 IDO1
cellular response to chemical stimulus	17/539 3.1%	0.00017492	STAT5A STAT5B ITGAM GPX1 HLF PIK3R1 SLC8A3 EPB41L5 PPP3CA AS3MT IFNG CCL6 CTNNB1 SIK2 PRKACA SOCS7 CKLF
regulation of phosphorylation	21/539 3.8%	0.00018091	DUSP4 EDN1 NPM1 FECH NOS2 F2R PXN CCK HMGCR HIPK3 RGMA EFNA1 ATXN1 IFNG KITL TAOK1 MADD CSPG4 PHACTR1 TLR6 CD44
regulation of cell death	30/539 5.5%	0.00018449	ADCYAP1R1 PDE1A TRP63 PIK3R1 BRCA2 BCL2L10 CASP7 ERBB2 PHLDA1 STAT5A STAT5B PRNP DFFA ACE GPX1 CAMK1D RIPK2 F2R BRAF CCK RHOA KITL STK17B MADD TRIM35 CTNNB1 GHRL EEF1E1 CD44 IDO1
response to bacterium	14/539 2.5%	0.00018855	STAT5B GPX1 NLRP1A NOS2 RIPK2 F2R CCK RBPJ PLD1 MAPK14 IFNG TLR6 CD47 IDO1
positive regulation of cell communication	17/539 3.1%	0.00019701	NTRK2 JAG1 GPX1 RIPK2 F2R BRAF CCK NENF ZAP70 IFNG KITL ERBB2 CTNNB1 TLR6 EEF1E1 CD44 CCR2
skeletal muscle organ development	9/539 1.6%	0.00020014	PPP3CA ACTA1 GPX1 F2R ERBB2 METTL8 MAPK14 RHOA FOXP1
immune system process	31/539 5.7%	0.00020512	ITGAM HLF FECH PIK3R1 RBPJ IFI30 BRCA2 NDRG1 CD79B CCL6 CCR2 STAT5A H60C STAT5B ACE RIPK2 IL1R1 BCL11A RPL22 CCK MLL5 IGJ PBX1 FOXP1 ZAP70 IFNG LY6D CTNNB1 TLR6 CD47 CKLF
RNA splicing, via transesterification reactions	6/539 1.1%	0.00022337	RBM17 CELF2 CELF4 PRPF31 GEMIN6 PRPF8
regulation of myeloid cell differentiation	8/539 1.4%	0.00023877	STAT5A STAT5B NDFIP1 JAG1 KITL CTNNB1 PIK3R1 MAPK14
regulation of transcription	64/539 11.8%	0.00024447	ATF1 PHTF2 KDM1B ZBTB20 TRP63 RBPJ TRPS1 HEY2 ME1 TMPO TLE3 TSC22D1 RIPK2 DYNLL1 RUNX2 RHOA SAP30 FOXP1 ETV6 IFNG LCOR ZFP410 ZMYND11 KHDRBS3 SMARCD3 HLF RNF6 NR2C2 ARNTL2 ARNTL HMBOX1 ATXN1 DNAJB6 NEUROD6 NRIP2 ERBB2 HESX1 PPARGC1A SCAI STAT5A STAT5B WWTR1 SKOR2 EGR3 BCL11A FOXJ2 TRIP4 NFATC1 CCK FOXN3 MLL5 SMAD6 MAPK14 KLF3 PBX1 HIPK3 TBX2 CDK7 NFIB KLF9 ZFP395 CTNNB1 TAF4B CKLF
regulation of apoptosis	29/539 5.3%	0.00024477	PDE1A TRP63 PIK3R1 BRCA2 BCL2L10 CASP7 ERBB2 PHLDA1 STAT5A STAT5B PRNP DFFA ACE GPX1 CAMK1D RIPK2 F2R BRAF CCK RHOA KITL STK17B MADD TRIM35 CTNNB1 GHRL EEF1E1 CD44 IDO1
macromolecule localization	36/539 6.6%	0.00027769	NAPB RAB5B PGAP1 MTTP AGAP1 AKAP7 BRCA2 ARNTL AP3M2 SNX4 PPP3CA GM2A RAB23 FAM53A STAT5A PEX16 STAT5B RAB4A SEC13 NPM1 OSBPL3 RANBP9 STXBP5L RHOB GNPTG NBEA NPC1 PPP1R3C HOOK2 CTNNB1 VPS45 SEC22B SEC24C RIN2 RAN OSBP2
regulation of phosphorus metabolic process	21/539 3.8%	0.0002979	DUSP4 EDN1 NPM1 FECH NOS2 F2R PXN CCK HMGCR HIPK3 RGMA EFNA1 ATXN1 IFNG KITL TAOK1 MADD CSPG4 PHACTR1 TLR6 CD44
regulation of phosphate metabolic process	21/539 3.8%	0.0002979	DUSP4 EDN1 NPM1 FECH NOS2 F2R PXN CCK HMGCR HIPK3 RGMA EFNA1 ATXN1 IFNG KITL TAOK1 MADD CSPG4 PHACTR1 TLR6 CD44
small molecule metabolic process	48/539 8.9%	0.00030334	SLC22A4 RAB5B PFKFB3 HLF FECH SHMT2 KDM1B PDE1A MTTP GDE1 AGAP1 PIK3R1 HMGCR PLD1 NT5C2 NT5C3 GLS PPP1CB CYB5R1 CYP27B1 AS3MT GNG3 ME1 ATP6V1H MGAT2 ATP6V1E1 ACADS STAT5A STAT5B RAB4A GPX1 NOS2 URAD SORD MLL5 MAPK14 SC4MOL RHOA PPP1CA SLC5A7 GLUD1 PPP1R3C IVD ALOX5AP ZCCHC4 PFKP GALK2 IDO1
regulation of programmed cell death	29/539 5.3%	0.00030533	PDE1A TRP63 PIK3R1 BRCA2 BCL2L10 CASP7 ERBB2 PHLDA1 STAT5A STAT5B PRNP DFFA ACE GPX1 CAMK1D RIPK2 F2R BRAF CCK RHOA KITL STK17B MADD TRIM35 CTNNB1 GHRL EEF1E1 CD44 IDO1
regulation of intracellular protein kinase cascade	14/539 2.5%	0.00033177	GPX1 RIPK2 AKAP7 BRAF CCK NENF HIPK3 RHOA IFNG ERBB2 CTNNB1 TLR6 CD44 CCR2
transcription	53/539 9.8%	0.00038039	ATF1 PHTF2 KDM1B ZBTB20 TRP63 PAPOLG HEY2 ME1 TLE3 TSC22D1 DYNLL1 RUNX2 SAP30 FOXP1 ETV6 LCOR ZFP410 ZMYND11 KHDRBS3 SMARCD3 HLF NR2C2 ARNTL2 ARNTL HMBOX1 NEUROD6 NRIP2 ERBB2 HESX1 PPARGC1A SCAI STAT5A STAT5B WWTR1 SKOR2 EGR3 BCL11A FOXJ2 TRIP4 NFATC1 FOXN3 MLL5 SMAD6 KLF3 PBX1 HIPK3 TBX2 CDK7 NFIB KLF9 CTNNB1 TAF4B CKLF
regulation of Rho protein signal transduction	9/539 1.6%	0.00038039	TIAM1 DNMBP ARHGEF37 ARHGEF38 ARHGEF3 ARHGEF10L ARHGEF7 KALRN SCAI
regulation of microtubule cytoskeleton organization	6/539 1.1%	0.00038039	NPM1 ROCK2 TMEM67 MTAP2 MTAP4 CLASP2
lymphocyte activation	14/539 2.5%	0.00038046	STAT5A H60C STAT5B ITGAM RIPK2 BCL11A RPL22 CCK PIK3R1 RBPJ FOXP1 ZAP70 LY6D CTNNB1
regulation of molecular function	35/539 6.4%	0.00038046	ADCYAP1R1 SMARCD3 TBC1D9B PXN ICA1 AGAP1 HMGCR EPB41L5 GM2A GALR1 DENND5A PPARGC1A TBC1D10A RGS6 DUSP4 EDN1 NPM1 NOS2 RIPK2 F2R ARAP2 CCK DYNLL1 HIPK3 RHOA EFNA1 TIAM1 TBC1D2 KITL TAOK1 MADD CSPG4 TLR6 PLCD1 SERINC5
positive regulation of leukocyte proliferation	8/539 1.4%	0.00040088	STAT5A STAT5B ZAP70 IFNG KITL RIPK2 CCK PDCD1LG2
regulation of leukocyte activation	13/539 2.4%	0.00043248	STAT5A STAT5B NDFIP1 RIPK2 CCK PDCD1LG2 LRRC32 ZAP70 IFNG ERBB2 CTNNB1 PAG1 IDO1
hemopoiesis	16/539 2.9%	0.000442	STAT5A STAT5B HLF FECH BCL11A RPL22 PIK3R1 RBPJ BRCA2 MLL5 PBX1 FOXP1 ZAP70 LY6D CTNNB1 CCR2
locomotion	20/539 3.7%	0.000442	NPM1 ITGAM GPX1 ITGA4 CMTM4 PLAT CCK DCLK1 EPB41L5 IFNG KITL CCL6 CSPG4 CD47 ARHGEF7 MDGA1 CKLF CD44 CTHRC1 CLASP2
cellular component morphogenesis	20/539 3.7%	0.00047385	WWTR1 NPM1 MKKS NFATC1 CCK RBPJ MAPK14 KALRN DCLK1 SNAP91 RHOA RTN4 EXT1 EPB41L5 NFASC KIF5C TMEM67 ERBB2 CTNNB1 GAS7
signal transduction	84/539 15.5%	0.00048494	BCAR3 LRRK1 NRGN OLFR887 OLFR883 OLFR681 RGS6 OLFR160 CCR2 DUSP4 EDN1 IL1R1 F2R VMN1R21 ARAP2 HTR3A HTR3B RHOF GABRG3 GABRG2 RHOA RHOB OLFR677 OLFR875 OLFR676 TIAM1 ZAP70 OLFR998 OLFR1404 IFNG OLFR675 MADD VMN2R66 SIK2 TLR6 ARHGEF7 RAF1 RIN2 CD44 ARL8B RAB5B ADCYAP1R1 HLF ROCK2 PDE1A PXN ITPR1 AGAP1 OLFR1436 PIK3R1 ARNTL2 ARNTL OLFR624 OLFR107 GNG3 RASSF10 GALR1 OLFR10 RAB23 CHN1 SRGAP3 MAP4K4 PA…
death	25/539 4.6%	0.00053214	NLRP1A AATK TRP63 BCL2L10 CASP7 WDR92 ADAMTSL4 PHLDA1 DFFA NPM1 GPX1 RIPK2 F2R CCK DYNLL1 HIPK3 RHOB NAIP2 IFNG KITL STK17B MADD TRIM35 CTNNB1 RAF1
mRNA processing	16/539 2.9%	0.00054385	RBM28 RBM17 KHDRBS3 RBM26 TSEN15 CELF2 CELF4 PPWD1 TSEN2 PRPF8 CDC40 HNRNPF PAPOLG PRPF31 GEMIN6 SNRPF
regulation of cell activation	13/539 2.4%	0.00058987	STAT5A STAT5B NDFIP1 RIPK2 CCK PDCD1LG2 LRRC32 ZAP70 IFNG ERBB2 CTNNB1 PAG1 IDO1
cell projection organization	20/539 3.7%	0.00059591	WWTR1 NPM1 MKKS GPR98 PXN CCK KALRN DCLK1 SNAP91 EXT1 NFASC TTC8 KIF5C TMEM67 ERBB2 MTAP2 GHRL CKLF CD44 GAS7
regulation of activated T cell proliferation	4/539 0.7%	0.00061205	STAT5A STAT5B LRRC32 IDO1
cell communication	25/539 4.6%	0.0006172	USP14 TRP63 PLAT PLD1 GLS SNX4 PPP3CA ATXN1 SH3PXD2A GALR1 SH3PXD2B ERBB2 NTRK2 NPM1 JAG1 EGR3 GPR98 GABRG2 SNAP91 SLC5A7 CTNNB1 GHRL FREM1 SERINC5 RAPSN
positive regulation of molecular function	20/539 3.7%	0.00062904	ADCYAP1R1 EDN1 NPM1 RIPK2 F2R PXN CCK HIPK3 RHOA EFNA1 EPB41L5 GM2A KITL GALR1 MADD CSPG4 TLR6 PPARGC1A PLCD1 SERINC5
programmed cell death	23/539 4.2%	0.00069605	DFFA NPM1 GPX1 RIPK2 AATK TRP63 CCK DYNLL1 HIPK3 RHOB NAIP2 BCL2L10 CASP7 WDR92 IFNG KITL ADAMTSL4 STK17B MADD TRIM35 CTNNB1 RAF1 PHLDA1
regulation of RNA metabolic process	43/539 7.9%	0.00073863	ATF1 HLF TRP63 RNF6 RBPJ NR2C2 ARNTL2 ARNTL ZFP36L1 HMBOX1 ATXN1 DNAJB6 TRPS1 NRIP2 HEY2 HESX1 ME1 PPARGC1A STAT5A TLE3 STAT5B WWTR1 NPM1 TSC22D1 FOXJ2 NFATC1 FOXN3 SMAD6 MAPK14 PBX1 HIPK3 RUNX2 RHOA SAP30 FOXP1 TBX2 ETV6 IFNG NFIB ZFP395 LCOR CTNNB1 CKLF
positive regulation of cell proliferation	20/539 3.7%	0.00074013	STAT5A STAT5B EDN1 NPM1 SHMT2 RIPK2 F2R TRP63 CCK PDCD1LG2 RBPJ PBX1 RUNX2 FOXP1 ZAP70 IFNG KITL HEY2 ERBB2 CTNNB1
mRNA metabolic process	17/539 3.1%	0.00077157	RBM28 RBM17 KHDRBS3 RBM26 TSEN15 CELF2 CELF4 PPWD1 TSEN2 PRPF8 CDC40 ZFP36L1 HNRNPF PAPOLG PRPF31 GEMIN6 SNRPF
negative regulation of cellular metabolic process	26/539 4.8%	0.00081896	TRP63 PIK3R1 RBPJ BRCA2 ATXN1 DNAJB6 RAB23 TRPS1 NRIP2 HESX1 SCAI WWTR1 EDN1 NPM1 NDFIP1 BCL11A DYNLL1 HIPK3 RUNX2 SAP30 FOXP1 TBX2 NPC1 LCOR CTNNB1 CKLF
cell surface receptor linked signaling pathway	75/539 13.9%	0.00090739	EPHB6 ITGAM GDE1 TRP63 PLAT RBPJ OLFR887 HEY2 OLFR883 OLFR681 RGS6 OLFR160 CCR2 TLE3 CSNK1G3 EDN1 ITGA4 RIPK2 IL1R1 F2R VMN1R21 HTR3A HTR3B GABRG3 GABRG2 RHOA OLFR677 OLFR875 OLFR676 TIAM1 ZAP70 OLFR998 OLFR1404 OLFR675 VMN2R66 SIK2 RAF1 ADCYAP1R1 PXN AKAP7 LTBP2 OLFR1436 PIK3R1 CXXC4 LTBP1 DLL3 CD79B OLFR624 OLFR107 GNG3 GALR1 OLFR10 ERBB2 SOCS7 P2RY12 STAT5A NTRK2 STAT5B JAG1 ANGPT2 OPN3 NOS2 G…
regulation of carbohydrate biosynthetic process	5/539 0.9%	0.00091552	PPP1CB ADCYAP1R1 PPP1R3C PLCD1 PPP1CA
negative regulation of developmental process	16/539 2.9%	0.00094182	STAT5A STAT5B WWTR1 JAG1 ANGPT2 UCMA TRP63 RNF6 PIK3R1 RBPJ PBX1 RHOA RTN4 DLL3 CTNNB1 CCR2
cell death	24/539 4.4%	0.00094979	DFFA NPM1 GPX1 NLRP1A RIPK2 AATK TRP63 CCK DYNLL1 HIPK3 RHOB NAIP2 BCL2L10 CASP7 WDR92 IFNG KITL ADAMTSL4 STK17B MADD TRIM35 CTNNB1 RAF1 PHLDA1
lymphocyte differentiation	10/539 1.8%	0.0009612	STAT5A STAT5B ZAP70 BCL11A RPL22 LY6D CTNNB1 PIK3R1 RBPJ FOXP1
allantoin metabolic process	3/539 0.5%	0.00098943	STAT5A STAT5B URAD
regulation of centrosome duplication	3/539 0.5%	0.00098943	NPM1 ROCK2 TMEM67
muscle tissue development	11/539 2.0%	0.0011073	PPP3CA ACTA1 GPX1 F2R ERBB2 TRP63 METTL8 MAPK14 RHOA FOXP1 TBX2
negative regulation of nitrogen compound metabolic process	22/539 4.0%	0.001166	WWTR1 EDN1 NPM1 NDFIP1 BCL11A TRP63 RBPJ DYNLL1 BRCA2 HIPK3 RUNX2 SAP30 FOXP1 TBX2 DNAJB6 TRPS1 NRIP2 HESX1 LCOR CTNNB1 CKLF SCAI
positive regulation of MAPKKK cascade	8/539 1.4%	0.0012073	RIPK2 ERBB2 CTNNB1 BRAF CCK NENF CD44 CCR2
regulation of catalytic activity	30/539 5.5%	0.0012078	ADCYAP1R1 TBC1D9B PXN AGAP1 HMGCR GM2A GALR1 DENND5A TBC1D10A RGS6 DUSP4 EDN1 NPM1 NOS2 F2R ARAP2 CCK DYNLL1 HIPK3 RHOA EFNA1 TIAM1 TBC1D2 KITL TAOK1 MADD CSPG4 TLR6 PLCD1 SERINC5
epithelial cell development	6/539 1.1%	0.0012078	EPB41L5 NPM1 GPX1 CTNNB1 TRP63 SHROOM3
protein localization	30/539 5.5%	0.0012232	NAPB RAB5B PGAP1 MTTP AGAP1 AKAP7 BRCA2 ARNTL AP3M2 SNX4 PPP3CA RAB23 FAM53A PEX16 RAB4A SEC13 NPM1 RANBP9 STXBP5L RHOB GNPTG NBEA PPP1R3C HOOK2 CTNNB1 VPS45 SEC22B SEC24C RIN2 RAN
tube development	18/539 3.3%	0.0012625	EDN1 NPM1 ACE GPX1 HLF PXN TRP63 SHROOM3 SMAD6 CLCN2 PBX1 FOXP1 RGMA PPP1CA NFIB TMEM67 CTNNB1 CD44
negative regulation of cell differentiation	14/539 2.5%	0.0012625	STAT5A STAT5B WWTR1 JAG1 UCMA TRP63 RNF6 PIK3R1 RBPJ PBX1 RHOA RTN4 DLL3 CTNNB1
apoptosis	22/539 4.0%	0.001347	DFFA NPM1 GPX1 RIPK2 AATK TRP63 CCK DYNLL1 HIPK3 RHOB NAIP2 BCL2L10 CASP7 WDR92 IFNG ADAMTSL4 STK17B MADD TRIM35 CTNNB1 RAF1 PHLDA1
regulation of MAP kinase activity	9/539 1.6%	0.0014767	DUSP4 EFNA1 KITL MADD PXN CSPG4 TLR6 HMGCR HIPK3
RNA processing	20/539 3.7%	0.0015495	RBM28 RBM17 KHDRBS3 RBM26 TSEN15 CELF2 CELF4 PPWD1 TSEN2 PRPF8 CDC40 THG1L NOB1 HNRNPF TRMT5 PAPOLG PRPF31 GEMIN6 SNRPF RPP38
response to hormone stimulus	14/539 2.5%	0.0015619	STAT5A STAT5B SORD BRAF PIK3R1 PLD1 CYP27B1 ME1 CTNNB1 SIK2 PRKACA SOCS7 PLCD1 PAG1
response to endogenous stimulus	15/539 2.7%	0.0016397	STAT5A STAT5B SORD BRAF PIK3R1 PLD1 EPB41L5 CYP27B1 ME1 CTNNB1 SIK2 PRKACA SOCS7 PLCD1 PAG1
hemopoietic or lymphoid organ development	16/539 2.9%	0.0016543	STAT5A STAT5B HLF FECH BCL11A RPL22 PIK3R1 RBPJ BRCA2 MLL5 PBX1 FOXP1 ZAP70 LY6D CTNNB1 CCR2
macromolecular complex assembly	19/539 3.5%	0.0017339	ATF1 PRNP NPM1 FECH CAB39 SHMT2 CELF2 CELF4 BRAF TUBG1 SNAP91 ALOX5AP CTNNB1 PRPF31 GEMIN6 ACADS PRND PFKP GAS7
negative regulation of T cell activation	6/539 1.1%	0.0017339	NDFIP1 ERBB2 PDCD1LG2 LRRC32 PAG1 IDO1
regulation of catabolic process	12/539 2.2%	0.0017339	PPP1CB NPM1 TBC1D2 NDFIP1 TBC1D9B NPC1 PPP1R3C ARAP2 AGAP1 TBC1D10A ARNTL PPP1CA
regulation of lymphocyte differentiation	7/539 1.2%	0.0017339	STAT5A STAT5B ZAP70 NDFIP1 RIPK2 ERBB2 CCK
regulation of immature T cell proliferation	3/539 0.5%	0.0017339	RIPK2 ERBB2 CCK
regulation of DNA damage response, signal transduction by p53 class mediator	3/539 0.5%	0.0017339	NPM1 EEF1E1 CD44
cellular component assembly	24/539 4.4%	0.0017339	ATF1 PRNP NPM1 MKKS FECH CAB39 SHMT2 CELF2 PXN CELF4 BRAF TUBG1 SNAP91 RHOA TMEM67 ALOX5AP CTNNB1 PRPF31 GEMIN6 ACADS PRND CKLF PFKP GAS7
RNA splicing, via transesterification reactions with bulged adenosine as nucleophile	5/539 0.9%	0.0017595	CELF2 CELF4 PRPF31 GEMIN6 PRPF8
nuclear mRNA splicing, via spliceosome	5/539 0.9%	0.0017595	CELF2 CELF4 PRPF31 GEMIN6 PRPF8
regulation of transcription, DNA-dependent	41/539 7.6%	0.0017777	ATF1 HLF TRP63 RNF6 RBPJ NR2C2 ARNTL2 ARNTL HMBOX1 ATXN1 DNAJB6 TRPS1 NRIP2 HEY2 HESX1 ME1 PPARGC1A STAT5A TLE3 STAT5B WWTR1 TSC22D1 FOXJ2 NFATC1 FOXN3 SMAD6 MAPK14 PBX1 HIPK3 RUNX2 RHOA SAP30 FOXP1 TBX2 ETV6 IFNG NFIB ZFP395 LCOR CTNNB1 CKLF
heart development	14/539 2.5%	0.001829	EDN1 NPM1 SMARCD3 ITGA4 NFATC1 RBPJ RTN4 FOXP1 TBX2 CASP7 COL5A1 ERBB2 CTNNB1 ALPK3
regulation of homeostatic process	9/539 1.6%	0.0018381	STAT5A STAT5B ADCYAP1R1 IFNG KITL F2R CCK MAPK14 CD44
positive regulation of mononuclear cell proliferation	7/539 1.2%	0.0018522	STAT5A STAT5B ZAP70 IFNG RIPK2 CCK PDCD1LG2
positive regulation of lymphocyte proliferation	7/539 1.2%	0.0018522	STAT5A STAT5B ZAP70 IFNG RIPK2 CCK PDCD1LG2
regulation of transferase activity	14/539 2.5%	0.0019591	DUSP4 EDN1 NPM1 F2R PXN CCK HMGCR HIPK3 EFNA1 KITL MADD CSPG4 TLR6 SERINC5
negative regulation of T cell proliferation	5/539 0.9%	0.0020341	NDFIP1 ERBB2 PDCD1LG2 LRRC32 IDO1
lipid metabolic process	28/539 5.1%	0.0020542	SLC22A4 PGAP1 FECH MTTP GDE1 PIK3R1 HMGCR PLD1 CYB5R1 CYP27B1 GM2A PIP4K2B MGAT2 ACADS STAT5A STAT5B GPX1 OSBPL3 MAPK14 SC4MOL PBX1 RBP2 ALOX5AP PIGK PLCD1 SERINC5 OSBP2 CDS2
negative regulation of nucleobase, nucleoside, nucleotide and nucleic acid metabolic process	21/539 3.8%	0.0020781	WWTR1 EDN1 NPM1 NDFIP1 BCL11A TRP63 RBPJ BRCA2 HIPK3 RUNX2 SAP30 FOXP1 TBX2 DNAJB6 TRPS1 NRIP2 HESX1 LCOR CTNNB1 CKLF SCAI
wound healing	10/539 1.8%	0.0021988	P2RY12 F7 IGSF10 THBD NPM1 GPX1 SERPIND1 F2R TFPI2 CD44
striated muscle tissue development	10/539 1.8%	0.0021988	PPP3CA ACTA1 GPX1 F2R ERBB2 METTL8 MAPK14 RHOA FOXP1 TBX2
regulation of cell cycle	14/539 2.5%	0.0022545	STAT5A BTG3 STAT5B NPM1 ROCK2 BRCA2 TUBG1 MLL5 MAPK14 RHOB DBF4 TMEM67 MADD PRKACA
small GTPase mediated signal transduction	14/539 2.5%	0.0022545	BCAR3 RAB5B RAB4A ROCK2 LRRK1 AGAP1 RHOF RHOA RHOB TIAM1 RAB23 RGL1 ARHGEF7 ARL8B
regulation of cytoskeleton organization	9/539 1.6%	0.0023262	NPM1 ROCK2 TMEM67 MTAP2 DSTN MTAP4 ARPC5 RHOA CLASP2
immune system development	16/539 2.9%	0.0024141	STAT5A STAT5B HLF FECH BCL11A RPL22 PIK3R1 RBPJ BRCA2 MLL5 PBX1 FOXP1 ZAP70 LY6D CTNNB1 CCR2
positive regulation of defense response	8/539 1.4%	0.0024141	STAT5A STAT5B ACE RIPK2 CCK TLR6 CD47 IDO1
regulation of centrosome cycle	3/539 0.5%	0.0027138	NPM1 ROCK2 TMEM67
response to wounding	18/539 3.3%	0.0028104	P2RY12 STAT5B NPM1 GPX1 SERPIND1 NOS2 F2R TFPI2 F7 IGSF10 THBD ERBB2 ALOX5AP CHST1 TLR6 CD44 IDO1 CCR2
regulation of MAPKKK cascade	10/539 1.8%	0.002871	RIPK2 ERBB2 CTNNB1 BRAF CCK NENF TLR6 HIPK3 CD44 CCR2
protein transport	26/539 4.8%	0.002871	NAPB RAB5B PGAP1 MTTP AGAP1 ARNTL AP3M2 SNX4 PPP3CA RAB23 FAM53A PEX16 RAB4A SEC13 RANBP9 STXBP5L RHOB GNPTG NBEA PPP1R3C HOOK2 VPS45 SEC22B SEC24C RIN2 RAN
regulation of protein kinase activity	13/539 2.4%	0.0029405	DUSP4 EDN1 NPM1 F2R PXN CCK HMGCR HIPK3 EFNA1 KITL MADD CSPG4 TLR6
alcohol metabolic process	18/539 3.3%	0.0029405	PFKFB3 HLF FECH MTTP SORD GDE1 PIK3R1 HMGCR MAPK14 SC4MOL PPP1CA PPP1CB SLC5A7 CYB5R1 PPP1R3C MGAT2 PFKP GALK2
response to peptide hormone stimulus	9/539 1.6%	0.0029405	STAT5A CYP27B1 STAT5B BRAF SIK2 PIK3R1 PLD1 SOCS7 PLCD1
cellular component biogenesis	26/539 4.8%	0.0030977	ATF1 FECH CAB39 SHMT2 CELF2 PXN CELF4 NOB1 TMEM67 ACADS PRND PRNP NPM1 MKKS RANBP9 BRAF TUBG1 SNAP91 RHOA ALOX5AP CTNNB1 PRPF31 GEMIN6 CKLF PFKP GAS7
homeostatic process	27/539 5.0%	0.0031169	HLF FECH MFI2 MTTP ITPR1 TXNDC11 PPP3CA GNG3 ATXN1 ERBB2 PRND CCR2 STAT5A STAT5B PRNP EDN1 NPM1 GPX1 F2R MLL5 SLC8A3 IFNG SLC9A8 CTNNB1 GHRL PLCD1 SERINC5
establishment of protein localization	26/539 4.8%	0.0032169	NAPB RAB5B PGAP1 MTTP AGAP1 ARNTL AP3M2 SNX4 PPP3CA RAB23 FAM53A PEX16 RAB4A SEC13 RANBP9 STXBP5L RHOB GNPTG NBEA PPP1R3C HOOK2 VPS45 SEC22B SEC24C RIN2 RAN
cellular response to organic substance	11/539 2.0%	0.0032466	SLC8A3 STAT5A EPB41L5 STAT5B PPP3CA IFNG CTNNB1 SIK2 PIK3R1 PRKACA SOCS7
positive regulation of transferase activity	11/539 2.0%	0.0032466	EFNA1 EDN1 NPM1 KITL F2R MADD PXN CSPG4 CCK TLR6 SERINC5
RNA metabolic process	25/539 4.6%	0.0032682	RBM28 KHDRBS3 RBM26 TSEN15 CELF2 CELF4 PPWD1 TSEN2 PRPF8 THG1L ZFP36L1 NOB1 PAPOLG RPP38 STAT5A STAT5B RBM17 CDC40 HNRNPF TRMT5 LCOR TAF4B PRPF31 GEMIN6 SNRPF
regulation of immune response	13/539 2.4%	0.0035213	STAT5A STAT5B NDFIP1 GPX1 RIPK2 CCK FOXP1 CD79B ZAP70 IFNG TLR6 IDO1 CCR2
negative regulation of metabolic process	26/539 4.8%	0.0035213	TRP63 PIK3R1 RBPJ BRCA2 ATXN1 DNAJB6 RAB23 TRPS1 NRIP2 HESX1 SCAI WWTR1 EDN1 NPM1 NDFIP1 BCL11A DYNLL1 HIPK3 RUNX2 SAP30 FOXP1 TBX2 NPC1 LCOR CTNNB1 CKLF
multi-organism process	18/539 3.3%	0.0035213	STAT5A STAT5B MKKS GPX1 NLRP1A NOS2 RIPK2 F2R CCK RBPJ PLD1 MAPK14 THBD IFNG KLF9 TLR6 CD47 IDO1
macromolecular complex subunit organization	19/539 3.5%	0.0035852	ATF1 PRNP NPM1 FECH CAB39 SHMT2 CELF2 CELF4 BRAF TUBG1 SNAP91 ALOX5AP CTNNB1 PRPF31 GEMIN6 ACADS PRND PFKP GAS7
positive regulation of apoptosis	15/539 2.7%	0.0035852	DFFA ACE GPX1 RIPK2 TRP63 CCK BRCA2 RHOA CASP7 STK17B TRIM35 EEF1E1 PHLDA1 CD44 IDO1
glycerolipid metabolic process	10/539 1.8%	0.0035852	SLC22A4 PGAP1 GPX1 MTTP PIGK PIP4K2B PIK3R1 MGAT2 PLD1 SERINC5
negative regulation of cell death	16/539 2.9%	0.0037774	STAT5A STAT5B PRNP ADCYAP1R1 GPX1 F2R TRP63 BRAF PIK3R1 RHOA BCL2L10 KITL ERBB2 GHRL CD44 IDO1
regulation of cell development	15/539 2.7%	0.0037999	ATF1 NTRK2 ACE RNF6 PIK3R1 KALRN PBX1 RHOA RTN4 DLL3 EFNA1 EPB41L5 TIAM1 IFNG RGS6
positive regulation of gene expression	25/539 4.6%	0.0037999	ATF1 SMARCD3 HLF TRP63 RNF6 RBPJ LRRC32 ARNTL HMBOX1 ATXN1 ME1 PPARGC1A STAT5A STAT5B WWTR1 NPM1 NFATC1 MAPK14 PBX1 RUNX2 IFNG NFIB CTNNB1 CKLF CD44
muscle structure development	13/539 2.4%	0.0038493	GPX1 SMARCD3 F2R TRP63 MAPK14 RHOA FOXP1 TBX2 PPP3CA ACTA1 ERBB2 CTNNB1 METTL8
regulation of glycogen catabolic process	3/539 0.5%	0.0038519	PPP1CB PPP1R3C PPP1CA
positive regulation of programmed cell death	15/539 2.7%	0.0038733	DFFA ACE GPX1 RIPK2 TRP63 CCK BRCA2 RHOA CASP7 STK17B TRIM35 EEF1E1 PHLDA1 CD44 IDO1
response to interleukin-12	2/539 0.3%	0.0038733	RIPK2 CCK
response to interleukin-18	2/539 0.3%	0.0038733	RIPK2 CCK
development of secondary male sexual characteristics	2/539 0.3%	0.0038733	STAT5A STAT5B
cellular response to peptidoglycan	2/539 0.3%	0.0038733	RIPK2 CCK
positive regulation of centrosome duplication	2/539 0.3%	0.0038733	NPM1 ROCK2
RNA splicing	12/539 2.2%	0.0038756	RBM28 RBM17 HNRNPF CELF2 CELF4 PPWD1 PRPF31 GEMIN6 SNRPF TSEN2 PRPF8 CDC40
positive regulation of catalytic activity	16/539 2.9%	0.0039502	ADCYAP1R1 EDN1 NPM1 F2R PXN CCK RHOA EFNA1 GM2A KITL GALR1 MADD CSPG4 TLR6 PLCD1 SERINC5
regulation of T cell differentiation	6/539 1.1%	0.0039502	STAT5A STAT5B ZAP70 RIPK2 ERBB2 CCK
negative regulation of lymphocyte activation	6/539 1.1%	0.0039502	NDFIP1 ERBB2 PDCD1LG2 LRRC32 PAG1 IDO1
regulation of kinase activity	13/539 2.4%	0.0039637	DUSP4 EDN1 NPM1 F2R PXN CCK HMGCR HIPK3 EFNA1 KITL MADD CSPG4 TLR6
positive regulation of response to stimulus	13/539 2.4%	0.0039637	STAT5A STAT5B ACE RIPK2 CCK CD79B ZAP70 GHRL TLR6 CD47 EEF1E1 IDO1 CCR2
response to cAMP	4/539 0.7%	0.0040109	SLC8A3 CYP27B1 BRAF PIK3R1
leukocyte differentiation	10/539 1.8%	0.0041334	STAT5A STAT5B ZAP70 BCL11A RPL22 LY6D CTNNB1 PIK3R1 RBPJ FOXP1
positive regulation of T cell activation	7/539 1.2%	0.0041334	STAT5A STAT5B ZAP70 IFNG RIPK2 CCK PDCD1LG2
positive regulation of response to external stimulus	7/539 1.2%	0.0041334	STAT5A STAT5B ACE GHRL CD47 IDO1 CCR2
response to organic substance	26/539 4.8%	0.0041334	RYR2 PIK3R1 PLD1 EPB41L5 CYP27B1 PPP3CA ME1 PRKACA SOCS7 PAG1 STAT5A STAT5B RIPK2 F2R VMN1R21 SORD BRAF CCK MAPK14 SLC8A3 IFNG CTNNB1 SIK2 TLR6 PLCD1 IDO1
negative regulation of mononuclear cell proliferation	5/539 0.9%	0.0041334	NDFIP1 ERBB2 PDCD1LG2 LRRC32 IDO1
negative regulation of leukocyte proliferation	5/539 0.9%	0.0041334	NDFIP1 ERBB2 PDCD1LG2 LRRC32 IDO1
negative regulation of lymphocyte proliferation	5/539 0.9%	0.0041334	NDFIP1 ERBB2 PDCD1LG2 LRRC32 IDO1
response to other organism	14/539 2.5%	0.0041334	STAT5B GPX1 NLRP1A NOS2 RIPK2 F2R CCK RBPJ PLD1 MAPK14 IFNG TLR6 CD47 IDO1
positive regulation of cell death	15/539 2.7%	0.0044314	DFFA ACE GPX1 RIPK2 TRP63 CCK BRCA2 RHOA CASP7 STK17B TRIM35 EEF1E1 PHLDA1 CD44 IDO1
regulation of transcription from RNA polymerase II promoter	26/539 4.8%	0.0044336	ATF1 HLF TRP63 RBPJ ARNTL2 ARNTL ATXN1 NRIP2 HEY2 ME1 PPARGC1A STAT5A STAT5B WWTR1 MAPK14 PBX1 HIPK3 RUNX2 RHOA SAP30 FOXP1 TBX2 NFIB ZFP395 LCOR CTNNB1
endoderm development	5/539 0.9%	0.0046418	EXT1 EPB41L5 ANGPT4 ANGPT2 CTNNB1
skeletal muscle fiber development	5/539 0.9%	0.0046418	PPP3CA ACTA1 GPX1 F2R ERBB2
muscle cell differentiation	9/539 1.6%	0.0046418	PPP3CA ACTA1 GPX1 SMARCD3 F2R ERBB2 CTNNB1 FOXP1 TBX2
neuron differentiation	20/539 3.7%	0.0046472	NTRK2 NPM1 JAG1 GPR98 CCK RBPJ KALRN DCLK1 SNAP91 EXT1 EFNA1 NFASC KIF5C ERBB2 MTAP2 CSPG4 GHRL PPIA CD44 GAS7
positive regulation of metabolic process	32/539 5.9%	0.004861	ATF1 ADCYAP1R1 SMARCD3 HLF TRP63 RNF6 RBPJ LRRC32 ARNTL HMBOX1 ATXN1 ME1 PPARGC1A STAT5A STAT5B WWTR1 NPM1 NDFIP1 NFATC1 CCK MAPK14 PBX1 RUNX2 RGMA IFNG KITL NFIB TAOK1 CTNNB1 CKLF PLCD1 CD44
T cell activation	9/539 1.6%	0.0048731	STAT5A STAT5B ZAP70 ITGAM RIPK2 BCL11A RPL22 CTNNB1 CCK
regulation of defense response	10/539 1.8%	0.0050881	STAT5A STAT5B ACE NDFIP1 GPX1 RIPK2 CCK TLR6 CD47 IDO1
transmission of nerve impulse	15/539 2.7%	0.0051049	USP14 EGR3 PLAT GABRG2 SNAP91 GLS SLC5A7 PPP3CA ATXN1 GALR1 ERBB2 CTNNB1 GHRL SERINC5 RAPSN
positive regulation of T cell differentiation	5/539 0.9%	0.0051442	STAT5A STAT5B ZAP70 RIPK2 CCK
regulation of I-kappaB kinase/NF-kappaB cascade	5/539 0.9%	0.0051442	RIPK2 CTNNB1 CCK TLR6 RHOA
regulation of cellular carbohydrate metabolic process	5/539 0.9%	0.0051442	PPP1CB ADCYAP1R1 PPP1R3C PLCD1 PPP1CA
positive regulation of protein kinase activity	10/539 1.8%	0.0052611	EFNA1 EDN1 NPM1 KITL F2R MADD PXN CSPG4 CCK TLR6
protein targeting	9/539 1.6%	0.0053424	PEX16 GNPTG PPP3CA NBEA PPP1R3C RANBP9 FAM53A RAN ARNTL
negative regulation of leukocyte activation	6/539 1.1%	0.005366	NDFIP1 ERBB2 PDCD1LG2 LRRC32 PAG1 IDO1
regulation of interleukin-2 production	4/539 0.7%	0.0054502	STAT5A STAT5B RIPK2 CCK
carbohydrate metabolic process	19/539 3.5%	0.0054681	OVGP1 PFKFB3 GLCE SORD GDE1 SLC3A2 PIK3R1 MAPK14 PPP1CA PPP1CB GNPTG GM2A PPP1R3C CHST1 MGAT2 ST3GAL1 PFKP GALK2 B4GALT5
negative regulation of apoptosis	15/539 2.7%	0.0056652	STAT5A STAT5B PRNP GPX1 F2R TRP63 BRAF PIK3R1 RHOA BCL2L10 KITL ERBB2 GHRL CD44 IDO1
regulation of carbohydrate metabolic process	5/539 0.9%	0.0056852	PPP1CB ADCYAP1R1 PPP1R3C PLCD1 PPP1CA
regulation of cytokine production	10/539 1.8%	0.0056852	STAT5A STAT5B NDFIP1 IFNG RIPK2 F2R CCK LRRC32 IDO1 CCR2
response to abiotic stimulus	14/539 2.5%	0.0057388	NPM1 MKKS GPX1 OPN3 ARPP21 FECH GPR98 HSPB1 HMGCR BRCA2 CASP7 ATXN1 ERCC4 GHRL
negative regulation of cell activation	6/539 1.1%	0.0057438	NDFIP1 ERBB2 PDCD1LG2 LRRC32 PAG1 IDO1
tissue remodeling	6/539 1.1%	0.0057438	STAT5A HLF ITGA4 NOS2 CTNNB1 CSPG4
positive regulation of cellular metabolic process	30/539 5.5%	0.0057826	ATF1 ADCYAP1R1 SMARCD3 HLF TRP63 RNF6 RBPJ ARNTL HMBOX1 ATXN1 ME1 PPARGC1A STAT5A STAT5B WWTR1 NPM1 NFATC1 CCK MAPK14 PBX1 RUNX2 RGMA IFNG KITL NFIB TAOK1 CTNNB1 CKLF PLCD1 CD44
tube morphogenesis	13/539 2.4%	0.0058348	EDN1 NPM1 ACE GPX1 PXN TRP63 SHROOM3 PBX1 RGMA PPP1CA TMEM67 CTNNB1 CD44
synaptic transmission	13/539 2.4%	0.0058348	USP14 EGR3 PLAT GABRG2 SNAP91 GLS SLC5A7 PPP3CA ATXN1 GALR1 CTNNB1 GHRL RAPSN
regulation of nervous system development	14/539 2.5%	0.0060361	ATF1 NTRK2 ACE RNF6 KALRN PBX1 RHOA RTN4 DLL3 EFNA1 TIAM1 IFNG GHRL RGS6
embryonic development	26/539 4.8%	0.0060424	PGAP1 HLF TRP63 HMGCR BRCA2 DLL3 EPB41L5 THBD DNAJB6 RAB23 HESX1 PRKACA BTF3 EDN1 NPM1 ITGA4 SHROOM3 PBX1 FOXP1 RGMA EXT1 EFNA1 UGDH CTNNB1 EEF1E1 PLCD1
muscle organ development	11/539 2.0%	0.0060785	PPP3CA ACTA1 GPX1 F2R ERBB2 TRP63 METTL8 MAPK14 RHOA FOXP1 TBX2
positive regulation of lymphocyte differentiation	5/539 0.9%	0.0062175	STAT5A STAT5B ZAP70 RIPK2 CCK
negative regulation of programmed cell death	15/539 2.7%	0.006398	STAT5A STAT5B PRNP GPX1 F2R TRP63 BRAF PIK3R1 RHOA BCL2L10 KITL ERBB2 GHRL CD44 IDO1
cell projection morphogenesis	13/539 2.4%	0.0064052	WWTR1 NPM1 MKKS CCK KALRN DCLK1 SNAP91 EXT1 NFASC KIF5C TMEM67 ERBB2 GAS7
spliceosome assembly	3/539 0.5%	0.0064052	CELF2 CELF4 GEMIN6
positive regulation of alpha-beta T cell proliferation	3/539 0.5%	0.0064052	ZAP70 RIPK2 CCK
regulation of cytokine-mediated signaling pathway	3/539 0.5%	0.0064052	RIPK2 CDC37 CCK
elevation of cytosolic calcium ion concentration involved in G-protein signaling coupled to IP3 second messenger	3/539 0.5%	0.0064052	EDN1 F2R PLCD1
protein amino acid autophosphorylation	7/539 1.2%	0.0066857	CSNK1G3 NTRK2 ZAP70 ERBB2 AATK PRKACA MAPK14
response to molecule of bacterial origin	7/539 1.2%	0.0066857	STAT5B RIPK2 F2R CCK TLR6 MAPK14 IDO1
response to light stimulus	8/539 1.4%	0.0067193	CASP7 ATXN1 OPN3 FECH ERCC4 GHRL HMGCR BRCA2
di-, tri-valent inorganic cation homeostasis	12/539 2.2%	0.0068486	SLC8A3 PRNP EDN1 GNG3 FECH MFI2 F2R ITPR1 GHRL PRND PLCD1 CCR2
positive regulation of macromolecule metabolic process	29/539 5.3%	0.0069471	ATF1 SMARCD3 HLF TRP63 RNF6 RBPJ LRRC32 ARNTL HMBOX1 ATXN1 ME1 PPARGC1A STAT5A STAT5B WWTR1 NPM1 NDFIP1 NFATC1 CCK MAPK14 PBX1 RUNX2 RGMA IFNG KITL NFIB CTNNB1 CKLF CD44
negative regulation of myeloid cell differentiation	4/539 0.7%	0.0070864	STAT5A STAT5B CTNNB1 PIK3R1
positive regulation of ERK1 and ERK2 cascade	4/539 0.7%	0.0070864	RIPK2 BRAF CCK CD44
regulation of generation of precursor metabolites and energy	4/539 0.7%	0.0070864	PPP1CB PPP1R3C PRKACA PPP1CA
positive regulation of kinase activity	10/539 1.8%	0.0073779	EFNA1 EDN1 NPM1 KITL F2R MADD PXN CSPG4 CCK TLR6
regulation of myeloid leukocyte differentiation	5/539 0.9%	0.0074797	STAT5A NDFIP1 KITL CTNNB1 PIK3R1
ion homeostasis	17/539 3.1%	0.007638	PRNP EDN1 FECH MFI2 F2R ITPR1 SLC8A3 PPP3CA GNG3 ATXN1 SLC9A8 ERBB2 GHRL PRND PLCD1 SERINC5 CCR2
regulation of organelle organization	10/539 1.8%	0.007664	NPM1 ROCK2 TMEM67 MTAP2 DSTN MTAP4 ARPC5 TUBG1 RHOA CLASP2
response to radiation	9/539 1.6%	0.0078161	CASP7 ATXN1 GPX1 OPN3 FECH ERCC4 GHRL HMGCR BRCA2
cell morphogenesis involved in differentiation	13/539 2.4%	0.0080933	NFATC1 CCK RBPJ KALRN DCLK1 SNAP91 RTN4 EXT1 EPB41L5 NFASC KIF5C ERBB2 CTNNB1
regulation of neurogenesis	13/539 2.4%	0.0080933	ATF1 NTRK2 ACE RNF6 KALRN PBX1 RHOA RTN4 DLL3 EFNA1 TIAM1 IFNG RGS6
muscle fiber development	5/539 0.9%	0.0080933	PPP3CA ACTA1 GPX1 F2R ERBB2
regulation of polysaccharide biosynthetic process	3/539 0.5%	0.0080933	PPP1CB PPP1R3C PPP1CA
regulation of erythrocyte differentiation	3/539 0.5%	0.0080933	STAT5A STAT5B MAPK14
response to copper ion	3/539 0.5%	0.0080933	CYP27B1 PRNP SORD
regulation of glycogen biosynthetic process	3/539 0.5%	0.0080933	PPP1CB PPP1R3C PPP1CA
regulation of glucan biosynthetic process	3/539 0.5%	0.0080933	PPP1CB PPP1R3C PPP1CA
cation homeostasis	13/539 2.4%	0.0082025	PRNP EDN1 FECH MFI2 F2R ITPR1 SLC8A3 GNG3 SLC9A8 GHRL PRND PLCD1 CCR2
cellular ion homeostasis	16/539 2.9%	0.0082281	PRNP EDN1 MFI2 F2R ITPR1 SLC8A3 PPP3CA GNG3 ATXN1 SLC9A8 ERBB2 GHRL PRND PLCD1 SERINC5 CCR2
MAPKKK cascade	9/539 1.6%	0.0083826	DUSP4 EFNA1 F2R MADD PXN BRAF CSPG4 RAF1 MAPK14
regulation of natural killer cell differentiation	2/539 0.3%	0.0084542	STAT5A STAT5B
positive regulation of natural killer cell differentiation	2/539 0.3%	0.0084542	STAT5A STAT5B
nucleotide-binding oligomerization domain containing 1 signaling pathway	2/539 0.3%	0.0084542	RIPK2 CCK
negative regulation of activated T cell proliferation	2/539 0.3%	0.0084542	LRRC32 IDO1
regulation of mast cell proliferation	2/539 0.3%	0.0084542	STAT5A KITL
positive regulation of mast cell proliferation	2/539 0.3%	0.0084542	STAT5A KITL
toll-like receptor 2 signaling pathway	2/539 0.3%	0.0084542	RIPK2 CCK
creatinine metabolic process	2/539 0.3%	0.0084542	STAT5A STAT5B
cell part morphogenesis	13/539 2.4%	0.0085111	WWTR1 NPM1 MKKS CCK KALRN DCLK1 SNAP91 EXT1 NFASC KIF5C TMEM67 ERBB2 GAS7
positive regulation of innate immune response	5/539 0.9%	0.0086368	STAT5A STAT5B RIPK2 CCK TLR6
negative regulation of cellular biosynthetic process	20/539 3.7%	0.0086368	WWTR1 EDN1 BCL11A TRP63 RBPJ DYNLL1 BRCA2 HIPK3 RUNX2 SAP30 FOXP1 TBX2 DNAJB6 TRPS1 NRIP2 HESX1 LCOR CTNNB1 CKLF SCAI
cellular lipid metabolic process	20/539 3.7%	0.0086368	SLC22A4 STAT5A STAT5B PGAP1 GPX1 MTTP PIK3R1 HMGCR PLD1 MAPK14 SC4MOL RBP2 GM2A ALOX5AP PIGK PIP4K2B MGAT2 ACADS SERINC5 CDS2
cellular cation homeostasis	12/539 2.2%	0.008776	SLC8A3 PRNP EDN1 GNG3 MFI2 SLC9A8 F2R ITPR1 GHRL PRND PLCD1 CCR2
positive regulation of nucleobase, nucleoside, nucleotide and nucleic acid metabolic process	24/539 4.4%	0.0088444	ATF1 STAT5A STAT5B WWTR1 ADCYAP1R1 NPM1 SMARCD3 HLF TRP63 NFATC1 RNF6 RBPJ MAPK14 PBX1 RUNX2 ARNTL HMBOX1 ATXN1 IFNG NFIB ME1 CTNNB1 PPARGC1A CKLF
morphogenesis of a branching structure	9/539 1.6%	0.0088723	EDN1 TMEM67 PXN CTNNB1 TRP63 PBX1 CD44 ERMN PPP1CA
neuron development	16/539 2.9%	0.0090414	NTRK2 NPM1 GPR98 CCK KALRN DCLK1 SNAP91 EXT1 NFASC KIF5C ERBB2 MTAP2 CSPG4 GHRL CD44 GAS7
protein homooligomerization	7/539 1.2%	0.0090573	PRNP NPM1 SHMT2 ALOX5AP ACADS PRND PFKP
ion transport	26/539 4.8%	0.0090595	SLC22A4 RYR2 KCNK9 MFI2 ITPR1 BEST3 CLCN2 CYP27B1 PPP3CA SLC39A6 ATP6V1H ATP6V1E1 SLC12A6 SLC13A2 F2R SLC39A10 KCNK15 NFATC1 HTR3A HTR3B GABRG3 GABRG2 SLC8A3 SLC5A7 TCN2 SLC9A8
steroid metabolic process	10/539 1.8%	0.0091908	CYB5R1 CYP27B1 STAT5B FECH OSBPL3 MTTP HMGCR SC4MOL PBX1 OSBP2
response to biotic stimulus	15/539 2.7%	0.0093894	STAT5B GPX1 NLRP1A NOS2 RIPK2 F2R TRP63 CCK RBPJ PLD1 MAPK14 IFNG TLR6 CD47 IDO1
cellular chemical homeostasis	16/539 2.9%	0.0094382	PRNP EDN1 MFI2 F2R ITPR1 SLC8A3 PPP3CA GNG3 ATXN1 SLC9A8 ERBB2 GHRL PRND PLCD1 SERINC5 CCR2
cellular homeostasis	18/539 3.3%	0.0097846	PRNP EDN1 NPM1 MFI2 F2R ITPR1 TXNDC11 SLC8A3 PPP3CA GNG3 ATXN1 SLC9A8 ERBB2 GHRL PRND PLCD1 SERINC5 CCR2
regulation of myeloid cell apoptosis	3/539 0.5%	0.0097846	STAT5A KITL CD44
response to peptidoglycan	3/539 0.5%	0.0097846	RIPK2 CCK MAPK14
negative regulation of biosynthetic process	20/539 3.7%	0.0098261	WWTR1 EDN1 BCL11A TRP63 RBPJ DYNLL1 BRCA2 HIPK3 RUNX2 SAP30 FOXP1 TBX2 DNAJB6 TRPS1 NRIP2 HESX1 LCOR CTNNB1 CKLF SCAI
defense response to bacterium	8/539 1.4%	0.0099375	NLRP1A IFNG NOS2 RIPK2 CCK TLR6 RBPJ PLD1
ribonucleoprotein complex assembly	4/539 0.7%	0.0099615	CELF2 CELF4 PRPF31 GEMIN6
regulation of epithelial cell differentiation	4/539 0.7%	0.0099615	STAT5A STAT5B CTNNB1 TRP63
cytoskeleton organization	14/539 2.5%	0.010408	ROCK2 CTTNBP2 CEP120 PXN SHROOM3 BRCA2 TUBG1 RHOA ERMN SGCB MTAP2 RAF1 GAS7 PACSIN1
chemical homeostasis	19/539 3.5%	0.010447	PRNP EDN1 HLF FECH MFI2 F2R MTTP ITPR1 SLC8A3 PPP3CA GNG3 ATXN1 SLC9A8 ERBB2 GHRL PRND PLCD1 SERINC5 CCR2
negative regulation of immune system process	7/539 1.2%	0.010621	NDFIP1 GPX1 ERBB2 PDCD1LG2 LRRC32 PAG1 IDO1
positive regulation of multicellular organismal process	13/539 2.4%	0.010864	STAT5A NTRK2 STAT5B EDN1 RIPK2 F2R DIO3 CCK F7 IFNG HEY2 CTNNB1 IDO1
mesenchyme development	6/539 1.1%	0.010919	EDN1 KITL CTNNB1 NFATC1 RBPJ RTN4
response to lipopolysaccharide	6/539 1.1%	0.010919	STAT5B RIPK2 F2R CCK MAPK14 IDO1
positive regulation of myeloid cell differentiation	4/539 0.7%	0.011226	STAT5A JAG1 KITL MAPK14
cellular response to molecule of bacterial origin	4/539 0.7%	0.011226	RIPK2 CCK TLR6 MAPK14
cation transport	21/539 3.8%	0.011226	SLC22A4 SLC13A2 RYR2 KCNK9 MFI2 F2R ITPR1 SLC39A10 NFATC1 HTR3A HTR3B SLC8A3 SLC5A7 CYP27B1 PPP3CA TCN2 SLC9A8 SLC39A6 ATP6V1H ATP6V1E1 SLC12A6
cell-cell signaling	16/539 2.9%	0.011271	NTRK2 USP14 NPM1 EGR3 TRP63 PLAT GABRG2 SNAP91 GLS SLC5A7 PPP3CA ATXN1 GALR1 CTNNB1 GHRL RAPSN
regulation of locomotion	10/539 1.8%	0.011313	EFNA1 EPB41L5 MKKS ACE GHRL PIK3R1 PLD1 SCAI RTN4 CCR2
response to hypoxia	6/539 1.1%	0.011577	EDN1 HLF NOS2 ITPR1 PLAT RAF1
regulation of cellular catabolic process	9/539 1.6%	0.011577	PPP1CB TBC1D2 TBC1D9B NPC1 PPP1R3C ARAP2 AGAP1 TBC1D10A PPP1CA
regulation of neuron differentiation	11/539 2.0%	0.011577	ATF1 EFNA1 NTRK2 TIAM1 IFNG RNF6 KALRN PBX1 RHOA RGS6 RTN4
cellular di-, tri-valent inorganic cation homeostasis	11/539 2.0%	0.011577	SLC8A3 PRNP EDN1 GNG3 MFI2 F2R ITPR1 GHRL PRND PLCD1 CCR2
protein oligomerization	10/539 1.8%	0.011577	PRNP NPM1 CAB39 SHMT2 ALOX5AP CTNNB1 BRAF ACADS PRND PFKP
amine metabolic process	15/539 2.7%	0.011577	OVGP1 SLC22A4 STAT5A STAT5B HLF NOS2 SHMT2 GLCE URAD DIO3 GLS SLC5A7 GLUD1 IVD IDO1
regulation of polysaccharide metabolic process	3/539 0.5%	0.011577	PPP1CB PPP1R3C PPP1CA
branched chain family amino acid metabolic process	3/539 0.5%	0.011577	STAT5A STAT5B IVD
regulation of glycogen metabolic process	3/539 0.5%	0.011577	PPP1CB PPP1R3C PPP1CA
regulation of microtubule depolymerization	3/539 0.5%	0.011577	MTAP2 MTAP4 CLASP2
negative regulation of microtubule depolymerization	3/539 0.5%	0.011577	MTAP2 MTAP4 CLASP2
epithelial cell differentiation involved in prostate gland development	3/539 0.5%	0.011577	STAT5A CTNNB1 TRP63
lipid storage	3/539 0.5%	0.011577	STAT5A STAT5B GM2A
development of primary female sexual characteristics	6/539 1.1%	0.012063	STAT5A STAT5B KITL MSH4 TRP63 BRCA2
positive regulation of nitrogen compound metabolic process	24/539 4.4%	0.012063	ATF1 STAT5A STAT5B WWTR1 ADCYAP1R1 NPM1 SMARCD3 HLF TRP63 NFATC1 RNF6 RBPJ MAPK14 PBX1 RUNX2 ARNTL HMBOX1 ATXN1 IFNG NFIB ME1 CTNNB1 PPARGC1A CKLF
positive regulation of transcription	22/539 4.0%	0.012063	ATF1 STAT5A STAT5B WWTR1 SMARCD3 HLF TRP63 NFATC1 RNF6 RBPJ MAPK14 PBX1 RUNX2 ARNTL HMBOX1 ATXN1 IFNG NFIB ME1 CTNNB1 PPARGC1A CKLF
positive regulation of I-kappaB kinase/NF-kappaB cascade	4/539 0.7%	0.012235	RIPK2 CTNNB1 CCK TLR6
regulation of cellular component movement	10/539 1.8%	0.012235	EFNA1 EPB41L5 STAT5B MKKS ACE PIK3R1 PLD1 SCAI RTN4 CCR2
regulation of cellular localization	13/539 2.4%	0.012336	NTRK2 EDN1 PPP1R12A ICA1 LRRC32 RTN4 GLUD1 PPP3CA IFNG ENSA GHRL PRKACA PLCD1
positive regulation of cellular biosynthetic process	25/539 4.6%	0.012475	ATF1 ADCYAP1R1 SMARCD3 HLF TRP63 RNF6 RBPJ ARNTL HMBOX1 ATXN1 ME1 PPARGC1A STAT5A STAT5B WWTR1 NPM1 NFATC1 MAPK14 PBX1 RUNX2 IFNG NFIB CTNNB1 CKLF PLCD1
positive regulation of inflammatory response	5/539 0.9%	0.012547	STAT5A STAT5B ACE CD47 IDO1
regulation of cell projection organization	9/539 1.6%	0.012695	ATF1 EFNA1 NTRK2 TIAM1 RNF6 KALRN RHOA ERMN RTN4
response to oxygen levels	6/539 1.1%	0.012702	EDN1 HLF NOS2 ITPR1 PLAT RAF1
regulation of anatomical structure size	12/539 2.2%	0.012702	EDN1 NPM1 ACE GPX1 EMP1 TRP63 DSTN RNF6 ARPC5 DCLK1 RHOA RTN4
metal ion transport	18/539 3.3%	0.013062	SLC22A4 SLC13A2 RYR2 KCNK9 MFI2 F2R ITPR1 SLC39A10 NFATC1 HTR3A SLC8A3 SLC5A7 CYP27B1 PPP3CA TCN2 SLC9A8 SLC39A6 SLC12A6
protein complex biogenesis	14/539 2.5%	0.013212	ATF1 PRNP NPM1 CAB39 SHMT2 BRAF TUBG1 SNAP91 ALOX5AP CTNNB1 ACADS PRND PFKP GAS7
protein complex assembly	14/539 2.5%	0.013212	ATF1 PRNP NPM1 CAB39 SHMT2 BRAF TUBG1 SNAP91 ALOX5AP CTNNB1 ACADS PRND PFKP GAS7
positive regulation of mitotic cell cycle	3/539 0.5%	0.013452	STAT5A STAT5B BRCA2
regulation of alpha-beta T cell proliferation	3/539 0.5%	0.013452	ZAP70 RIPK2 CCK
regulation of carbohydrate catabolic process	3/539 0.5%	0.013452	PPP1CB PPP1R3C PPP1CA
regulation of cellular carbohydrate catabolic process	3/539 0.5%	0.013452	PPP1CB PPP1R3C PPP1CA
lipopolysaccharide-mediated signaling pathway	3/539 0.5%	0.013452	RIPK2 CCK MAPK14
cellular response to endogenous stimulus	7/539 1.2%	0.013452	STAT5A EPB41L5 STAT5B SIK2 PIK3R1 PRKACA SOCS7
catabolic process	28/539 5.1%	0.013452	USP14 RAB5B PDE1A AGAP1 RNF6 PLD1 GLS ZFP36L1 CYP27B1 GNG3 GM2A ATP6V1E1 ACADS OVGP1 DFFA RAB4A GPX1 NOS2 DIO3 USP28 OXR1 RHOA CYLD IVD SPACA3 PLCD1 PFKP IDO1
negative regulation of mast cell apoptosis	2/539 0.3%	0.013452	STAT5A KITL
positive regulation of immature T cell proliferation	2/539 0.3%	0.013452	RIPK2 CCK
positive regulation of T-helper 1 cell differentiation	2/539 0.3%	0.013452	RIPK2 CCK
negative regulation of erythrocyte differentiation	2/539 0.3%	0.013452	STAT5A STAT5B
toll-like receptor 4 signaling pathway	2/539 0.3%	0.013452	RIPK2 CCK
positive regulation of cytokine-mediated signaling pathway	2/539 0.3%	0.013452	RIPK2 CCK
isoleucine metabolic process	2/539 0.3%	0.013452	STAT5A STAT5B
regulation of inositol phosphate biosynthetic process	2/539 0.3%	0.013452	ADCYAP1R1 PLCD1
positive regulation of T-helper 1 type immune response	2/539 0.3%	0.013452	RIPK2 CCK
JAK-STAT cascade involved in growth hormone signaling pathway	2/539 0.3%	0.013452	STAT5A STAT5B
positive regulation of inositol phosphate biosynthetic process	2/539 0.3%	0.013452	ADCYAP1R1 PLCD1
positive regulation of interleukin-2 production	2/539 0.3%	0.013452	RIPK2 CCK
neuron projection development	13/539 2.4%	0.013478	NPM1 CCK KALRN DCLK1 SNAP91 EXT1 NFASC KIF5C ERBB2 MTAP2 GHRL CD44 GAS7
positive regulation of immune system process	12/539 2.2%	0.013709	CD79B STAT5A STAT5B ZAP70 IFNG RIPK2 CCK PDCD1LG2 TLR6 IDO1 FOXP1 CCR2
positive regulation of biosynthetic process	25/539 4.6%	0.014217	ATF1 ADCYAP1R1 SMARCD3 HLF TRP63 RNF6 RBPJ ARNTL HMBOX1 ATXN1 ME1 PPARGC1A STAT5A STAT5B WWTR1 NPM1 NFATC1 MAPK14 PBX1 RUNX2 IFNG NFIB CTNNB1 CKLF PLCD1
positive regulation of MAP kinase activity	6/539 1.1%	0.01475	EFNA1 KITL MADD PXN CSPG4 TLR6
elevation of cytosolic calcium ion concentration	7/539 1.2%	0.014877	SLC8A3 EDN1 GNG3 F2R ITPR1 GHRL PLCD1
cellular response to biotic stimulus	5/539 0.9%	0.015281	IFNG RIPK2 CCK TLR6 MAPK14
regulation of DNA metabolic process	6/539 1.1%	0.015705	ATF1 NPM1 NDFIP1 IFNG KDM1B BRCA2
embryonic morphogenesis	16/539 2.9%	0.015786	EDN1 NPM1 ITGA4 TRP63 SHROOM3 PBX1 RGMA EXT1 EFNA1 EPB41L5 UGDH DNAJB6 RAB23 HESX1 CTNNB1 PRKACA
toll-like receptor signaling pathway	3/539 0.5%	0.016017	RIPK2 CCK TLR6
cellular amide metabolic process	3/539 0.5%	0.016017	STAT5A STAT5B URAD
transmembrane transport	25/539 4.6%	0.016131	SLC45A4 SLC22A4 RYR2 KCNK9 ITPR1 ABCB8 SLC3A2 BEST3 CLCN2 SLC25A26 MFSD3 SLC39A6 ATP6V1H ATP6V1E1 SLC12A6 SLC13A2 NPM1 SLC39A10 HTR3A HTR3B GABRG3 GABRG2 SLC8A3 SLC5A7 SLC9A8
regulation of ERK1 and ERK2 cascade	4/539 0.7%	0.016187	RIPK2 BRAF CCK CD44
regulation of inflammatory response	7/539 1.2%	0.016361	STAT5A STAT5B ACE NDFIP1 GPX1 CD47 IDO1
protein import into nucleus	5/539 0.9%	0.016361	PPP3CA RANBP9 FAM53A RAN ARNTL
regulation of cell cycle process	6/539 1.1%	0.016465	NPM1 DBF4 ROCK2 TMEM67 BRCA2 TUBG1
negative regulation of macromolecule metabolic process	22/539 4.0%	0.016465	WWTR1 NPM1 NDFIP1 BCL11A TRP63 PIK3R1 RBPJ BRCA2 HIPK3 RUNX2 SAP30 FOXP1 TBX2 DNAJB6 RAB23 TRPS1 NRIP2 HESX1 LCOR CTNNB1 CKLF SCAI
negative regulation of transport	8/539 1.4%	0.016964	PPP3CA EDN1 NEDD4L GHRL LRRC32 BEST3 RHOA PACSIN1
regulation of anatomical structure morphogenesis	13/539 2.4%	0.017097	ANGPT2 SHROOM3 RNF6 RUNX2 ERMN RTN4 RHOB EFNA1 EPB41L5 TIAM1 CTNNB1 GAS7 CCR2
protein import	6/539 1.1%	0.017445	PEX16 PPP3CA RANBP9 FAM53A RAN ARNTL
female sex differentiation	6/539 1.1%	0.017445	STAT5A STAT5B KITL MSH4 TRP63 BRCA2
nuclear import	5/539 0.9%	0.01753	PPP3CA RANBP9 FAM53A RAN ARNTL
regulation of neuron projection development	8/539 1.4%	0.017594	ATF1 EFNA1 NTRK2 TIAM1 RNF6 KALRN RHOA RTN4
cell chemotaxis	4/539 0.7%	0.017752	ITGAM IFNG CCL6 CKLF
positive regulation of cellular component organization	10/539 1.8%	0.018077	ATF1 EPB41L5 TIAM1 NPM1 ROCK2 DSTN GHRL CCK CD47 RHOA
negative regulation of transcription	17/539 3.1%	0.018489	WWTR1 BCL11A TRP63 RBPJ HIPK3 RUNX2 SAP30 FOXP1 TBX2 DNAJB6 TRPS1 NRIP2 HESX1 LCOR CTNNB1 CKLF SCAI
tissue regeneration	3/539 0.5%	0.018574	IGSF10 NPM1 GPX1
natural killer cell activation	3/539 0.5%	0.018574	STAT5A H60C STAT5B
negative regulation of microtubule polymerization or depolymerization	3/539 0.5%	0.018574	MTAP2 MTAP4 CLASP2
regulation of chemokine production	3/539 0.5%	0.018574	IFNG RIPK2 CCK
regulation of innate immune response	5/539 0.9%	0.018618	STAT5A STAT5B RIPK2 CCK TLR6
Notch signaling pathway	5/539 0.9%	0.018618	JAG1 HEY2 TRP63 RBPJ DLL3
biological adhesion	20/539 3.7%	0.01975	SCARB2 ITGAM ITGA4 GPR98 PXN RHOA RHOB EPB41L5 NFASC DNAJB6 COL5A1 KITL COL8A2 CTNNB1 FAT3 DSG2 CD47 FREM1 CD44 SDK2
cell adhesion	20/539 3.7%	0.01975	SCARB2 ITGAM ITGA4 GPR98 PXN RHOA RHOB EPB41L5 NFASC DNAJB6 COL5A1 KITL COL8A2 CTNNB1 FAT3 DSG2 CD47 FREM1 CD44 SDK2
cellular response to peptide hormone stimulus	5/539 0.9%	0.01975	STAT5A STAT5B SIK2 PIK3R1 SOCS7
mesenchymal cell development	5/539 0.9%	0.01975	EDN1 KITL NFATC1 RBPJ RTN4
negative regulation of cell proliferation	12/539 2.2%	0.01975	NPM1 NDFIP1 IFNG NFIB ERBB2 TRIM35 PDCD1LG2 RBPJ LRRC32 IFI30 EEF1E1 IDO1
regulation of mast cell apoptosis	2/539 0.3%	0.01975	STAT5A KITL
regulation of T-helper 1 cell differentiation	2/539 0.3%	0.01975	RIPK2 CCK
positive regulation of striated muscle tissue development	2/539 0.3%	0.01975	NPM1 HMGCR
nucleotide-binding oligomerization domain containing signaling pathway	2/539 0.3%	0.01975	RIPK2 CCK
nucleotide-binding oligomerization domain containing 2 signaling pathway	2/539 0.3%	0.01975	RIPK2 CCK
response to interleukin-1	2/539 0.3%	0.01975	RIPK2 CCK
positive regulation of blood coagulation	2/539 0.3%	0.01975	F7 F2R
cellular response to growth hormone stimulus	2/539 0.3%	0.01975	STAT5A STAT5B
natural killer cell differentiation	2/539 0.3%	0.01975	STAT5A STAT5B
creatine metabolic process	2/539 0.3%	0.01975	STAT5A STAT5B
growth hormone receptor signaling pathway	2/539 0.3%	0.01975	STAT5A STAT5B
positive regulation of muscle organ development	2/539 0.3%	0.01975	NPM1 HMGCR
regulation of binding	7/539 1.2%	0.019846	EPB41L5 SMARCD3 RIPK2 ICA1 CCK PPARGC1A HIPK3
T cell differentiation	6/539 1.1%	0.021009	STAT5A STAT5B ZAP70 BCL11A RPL22 CTNNB1
coagulation	6/539 1.1%	0.021009	P2RY12 F7 THBD SERPIND1 F2R TFPI2
blood coagulation	6/539 1.1%	0.021009	P2RY12 F7 THBD SERPIND1 F2R TFPI2
regulation of response to extracellular stimulus	3/539 0.5%	0.021009	NPC1 GHRL CCK
regulation of response to nutrient levels	3/539 0.5%	0.021009	NPC1 GHRL CCK
positive regulation of macromolecule biosynthetic process	23/539 4.2%	0.021197	ATF1 STAT5A STAT5B WWTR1 NPM1 SMARCD3 HLF TRP63 NFATC1 RNF6 RBPJ MAPK14 PBX1 RUNX2 ARNTL HMBOX1 ATXN1 IFNG NFIB ME1 CTNNB1 PPARGC1A CKLF
rhythmic process	8/539 1.4%	0.021541	STAT5A STAT5B HLF KITL MSH4 ERBB2 ARNTL2 ARNTL
regulation of hydrolase activity	12/539 2.2%	0.021572	ADCYAP1R1 EDN1 TBC1D2 TBC1D9B GM2A F2R ARAP2 AGAP1 CCK PLCD1 TBC1D10A RHOA
positive regulation of lymphocyte activation	7/539 1.2%	0.021575	STAT5A STAT5B ZAP70 IFNG RIPK2 CCK PDCD1LG2
branching morphogenesis of a tube	7/539 1.2%	0.021575	EDN1 TMEM67 PXN CTNNB1 PBX1 CD44 PPP1CA
hemostasis	6/539 1.1%	0.021977	P2RY12 F7 THBD SERPIND1 F2R TFPI2
cellular protein localization	13/539 2.4%	0.022026	PEX16 NAPB PGAP1 RANBP9 ARNTL AP3M2 GNPTG PPP3CA NBEA PPP1R3C CTNNB1 FAM53A RAN
cytosolic calcium ion homeostasis	7/539 1.2%	0.022534	SLC8A3 EDN1 GNG3 F2R ITPR1 GHRL PLCD1
response to UV	4/539 0.7%	0.022534	CASP7 FECH ERCC4 BRCA2
antigen receptor-mediated signaling pathway	4/539 0.7%	0.022534	CD79B ZAP70 RIPK2 CCK
epithelial cell differentiation	8/539 1.4%	0.023054	STAT5A EPB41L5 NPM1 GPX1 CTNNB1 TRP63 SHROOM3 RBPJ
cellular macromolecule localization	13/539 2.4%	0.023054	PEX16 NAPB PGAP1 RANBP9 ARNTL AP3M2 GNPTG PPP3CA NBEA PPP1R3C CTNNB1 FAM53A RAN
intracellular protein transport	12/539 2.2%	0.02312	AP3M2 PEX16 GNPTG PPP3CA NAPB PGAP1 NBEA PPP1R3C RANBP9 FAM53A RAN ARNTL
protein localization in nucleus	5/539 0.9%	0.023478	PPP3CA RANBP9 FAM53A RAN ARNTL
mesenchymal cell differentiation	5/539 0.9%	0.023478	EDN1 KITL NFATC1 RBPJ RTN4
negative regulation of macromolecule biosynthetic process	18/539 3.3%	0.023909	WWTR1 BCL11A TRP63 RBPJ BRCA2 HIPK3 RUNX2 SAP30 FOXP1 TBX2 DNAJB6 TRPS1 NRIP2 HESX1 LCOR CTNNB1 CKLF SCAI
regulation of protein binding	3/539 0.5%	0.023959	EPB41L5 SMARCD3 ICA1
cellular catabolic process	22/539 4.0%	0.024214	USP14 DFFA RAB5B RAB4A GPX1 NOS2 PDE1A AGAP1 RNF6 PLD1 USP28 RHOA GLS ZFP36L1 CYLD CYP27B1 GNG3 GM2A IVD ATP6V1E1 ACADS IDO1
negative regulation of gene expression	18/539 3.3%	0.024787	WWTR1 NPM1 BCL11A TRP63 RBPJ HIPK3 RUNX2 SAP30 FOXP1 TBX2 DNAJB6 TRPS1 NRIP2 HESX1 LCOR CTNNB1 CKLF SCAI
cell maturation	6/539 1.1%	0.025551	NPM1 HLF CTNNB1 CSPG4 BRCA2 RUNX2
developmental maturation	7/539 1.2%	0.025551	NPM1 HLF CTNNB1 CSPG4 RBPJ BRCA2 RUNX2
homeostasis of number of cells	7/539 1.2%	0.026732	STAT5A STAT5B HLF FECH IFNG F2R MLL5
cell-substrate adhesion	5/539 0.9%	0.026732	EPB41L5 PXN CTNNB1 FREM1 RHOA
glial cell migration	2/539 0.3%	0.026732	CSPG4 ARHGEF7
negative regulation of myeloid cell apoptosis	2/539 0.3%	0.026732	STAT5A KITL
regulation of gamma-delta T cell differentiation	2/539 0.3%	0.026732	STAT5A STAT5B
positive regulation of gamma-delta T cell differentiation	2/539 0.3%	0.026732	STAT5A STAT5B
positive regulation of T-helper cell differentiation	2/539 0.3%	0.026732	RIPK2 CCK
regulation of gamma-delta T cell activation	2/539 0.3%	0.026732	STAT5A STAT5B
positive regulation of gamma-delta T cell activation	2/539 0.3%	0.026732	STAT5A STAT5B
citrate metabolic process	2/539 0.3%	0.026732	STAT5A STAT5B
valine metabolic process	2/539 0.3%	0.026732	STAT5A STAT5B
ephrin receptor signaling pathway	2/539 0.3%	0.026732	EFNA1 TIAM1
response to growth hormone stimulus	2/539 0.3%	0.026732	STAT5A STAT5B
taurine metabolic process	2/539 0.3%	0.026732	STAT5A STAT5B
chorio-allantoic fusion	2/539 0.3%	0.026732	ITGA4 DNAJB6
oligosaccharide metabolic process	3/539 0.5%	0.02691	GNPTG GM2A MGAT2
organ morphogenesis	22/539 4.0%	0.027302	STAT5A NTRK2 EDN1 NPM1 MKKS JAG1 SMARCD3 TRP63 SHROOM3 PBX1 RUNX2 RTN4 TBX2 RGMA EFNA1 EPB41L5 COL5A1 HESX1 COL8A2 CTNNB1 PRKACA CD44
striated muscle cell development	5/539 0.9%	0.02783	PPP3CA ACTA1 GPX1 F2R ERBB2
regulation of body fluid levels	7/539 1.2%	0.028199	P2RY12 F7 THBD EDN1 SERPIND1 F2R TFPI2
positive regulation of hydrolase activity	7/539 1.2%	0.028199	ADCYAP1R1 EDN1 GM2A F2R CCK PLCD1 RHOA
positive regulation of leukocyte activation	7/539 1.2%	0.028199	STAT5A STAT5B ZAP70 IFNG RIPK2 CCK PDCD1LG2
reproductive process	21/539 3.8%	0.028199	SPATA9 OVGP1 STAT5A TLE3 STAT5B ADCYAP1R1 MKKS NOS2 KDM1B TRP63 BRCA2 NR2C2 PBX1 THBD KITL MSH4 KLF9 ERBB2 SPACA3 CTNNB1 CD44
regulation of ion transport	9/539 1.6%	0.028199	P2RY12 ADCYAP1R1 NPM1 F2R NEDD4L HTR3A BEST3 CLCN2 RHOA
T cell differentiation in the thymus	4/539 0.7%	0.028199	STAT5A STAT5B ZAP70 CTNNB1
membrane depolarization	4/539 0.7%	0.028199	PPP3CA EDN1 ATXN1 GHRL
negative regulation of RNA metabolic process	14/539 2.5%	0.028473	WWTR1 NPM1 TRP63 RBPJ HIPK3 SAP30 FOXP1 TBX2 DNAJB6 TRPS1 NRIP2 LCOR CTNNB1 CKLF
morphogenesis of an epithelium	11/539 2.0%	0.028816	STAT5A EPB41L5 EDN1 NPM1 JAG1 CTNNB1 TRP63 SHROOM3 PBX1 CD44 RGMA
regulation of cell morphogenesis	8/539 1.4%	0.028816	EFNA1 EPB41L5 TIAM1 SHROOM3 RNF6 ERMN RTN4 GAS7
gland development	10/539 1.8%	0.028874	STAT5A STAT5B CTNNB1 TRP63 RBPJ BRCA2 CLCN2 PBX1 CD44 TBX2
detection of external stimulus	5/539 0.9%	0.029105	MKKS OPN3 FECH GPR98 TLR6
negative regulation of cellular component organization	7/539 1.2%	0.029105	TMEM67 MTAP2 MTAP4 RNF6 RTN4 PACSIN1 CLASP2
reproduction	21/539 3.8%	0.029255	SPATA9 OVGP1 STAT5A TLE3 STAT5B ADCYAP1R1 MKKS NOS2 KDM1B TRP63 BRCA2 NR2C2 PBX1 THBD KITL MSH4 KLF9 ERBB2 SPACA3 CTNNB1 CD44
peptidyl-amino acid modification	8/539 1.4%	0.029672	STAT5A ZAP70 IFNG PXN MTAP2 MGAT2 PRKACA HIPK3
reproductive structure development	8/539 1.4%	0.029672	STAT5A STAT5B KITL MSH4 CTNNB1 TRP63 BRCA2 CD44
di-, tri-valent inorganic cation transport	9/539 1.6%	0.029681	SLC8A3 CYP27B1 RYR2 PPP3CA TCN2 MFI2 F2R ITPR1 NFATC1
T cell receptor signaling pathway	3/539 0.5%	0.029876	ZAP70 RIPK2 CCK
epithelial to mesenchymal transition	3/539 0.5%	0.029876	NFATC1 RBPJ RTN4
neutrophil chemotaxis	3/539 0.5%	0.029876	ITGAM IFNG CKLF
positive regulation of phospholipase C activity	4/539 0.7%	0.030058	ADCYAP1R1 EDN1 F2R PLCD1
activation of phospholipase C activity	4/539 0.7%	0.030058	ADCYAP1R1 EDN1 F2R PLCD1
sex differentiation	8/539 1.4%	0.030378	STAT5A STAT5B KITL MSH4 CTNNB1 TRP63 BRCA2 PBX1
positive regulation of binding	5/539 0.9%	0.030378	EPB41L5 RIPK2 CCK PPARGC1A HIPK3
GTP catabolic process	5/539 0.9%	0.030378	RAB5B RAB4A GNG3 AGAP1 RHOA
immune response-activating signal transduction	5/539 0.9%	0.030378	CD79B ZAP70 RIPK2 CCK TLR6
regulation of mitotic cell cycle	6/539 1.1%	0.030944	STAT5A BTG3 STAT5B DBF4 BRCA2 TUBG1
organelle organization	31/539 5.7%	0.030949	RAB5B SMARCD3 HLF ROCK2 KDM1B CTTNBP2 CEP120 PXN BRCA2 CASP7 SGCB METTL8 PPARGC1A HMGN3 PACSIN1 CLASP2 PEX16 SUN2 SHROOM3 CCK TUBG1 MLL5 SNAP91 RHOA ERMN MSH4 MTAP2 RAF1 RAN GAS7 ARL8B
regulation of secretion	11/539 2.0%	0.032128	GLUD1 NTRK2 PPP3CA EDN1 IFNG ENSA ICA1 GHRL LRRC32 PLCD1 RTN4
fat cell differentiation	5/539 0.9%	0.032128	TTC8 MKKS GPX1 METTL8 SOCS7
regulation of endocytosis	5/539 0.9%	0.032128	RAB5B RAB4A CD47 SNAP91 PACSIN1
ovulation cycle process	5/539 0.9%	0.032128	STAT5A STAT5B KITL MSH4 ERBB2
prostate gland development	4/539 0.7%	0.032221	STAT5A CTNNB1 TRP63 CD44
nucleocytoplasmic transport	6/539 1.1%	0.032235	PPP3CA NPM1 RANBP9 FAM53A RAN ARNTL
DNA metabolic process	15/539 2.7%	0.032313	DFFA KDM1B LRRK1 BRCA2 MLL5 USP28 FOXP1 RAD51B EEPD1 DBF4 NFIB ERCC4 MSH4 RAD1 EEF1E1
cellular localization	22/539 4.0%	0.032365	PEX16 NTRK2 NAPB SEC13 NPM1 PGAP1 CEP120 RANBP9 BRCA2 SNAP91 STXBP5L ARNTL AP3M2 GNPTG PPP3CA NBEA PPP1R3C CTNNB1 FAM53A VPS45 SEC22B RAN
positive regulation of alpha-beta T cell differentiation	3/539 0.5%	0.033267	ZAP70 RIPK2 CCK
regulation of protein metabolic process	16/539 2.9%	0.033294	NPM1 NDFIP1 FECH NOS2 CCK PIK3R1 HIPK3 RGMA ARNTL PPP1CA ZFP36L1 IFNG KITL RAB23 TLR6 CD44
positive regulation of cell activation	7/539 1.2%	0.033294	STAT5A STAT5B ZAP70 IFNG RIPK2 CCK PDCD1LG2
female gonad development	5/539 0.9%	0.033454	STAT5A STAT5B KITL MSH4 BRCA2
positive regulation of B cell differentiation	2/539 0.3%	0.033454	STAT5A STAT5B
luteinization	2/539 0.3%	0.033454	STAT5A STAT5B
negative regulation of cell-cell adhesion	2/539 0.3%	0.033454	EPB41L5 PIK3R1
mRNA splice site selection	2/539 0.3%	0.033454	CELF2 CELF4
phosphagen metabolic process	2/539 0.3%	0.033454	STAT5A STAT5B
regulation of T-helper 1 type immune response	2/539 0.3%	0.033454	RIPK2 CCK
sympathetic nervous system development	2/539 0.3%	0.033454	ERBB2 TRP63
Peyer's patch development	2/539 0.3%	0.033454	STAT5A STAT5B
positive regulation of phospholipase activity	4/539 0.7%	0.034079	ADCYAP1R1 EDN1 F2R PLCD1
triglyceride metabolic process	4/539 0.7%	0.034079	SLC22A4 GPX1 MTTP MGAT2
neuron projection morphogenesis	10/539 1.8%	0.034653	EXT1 NFASC NPM1 KIF5C ERBB2 CCK KALRN DCLK1 SNAP91 GAS7
nuclear transport	6/539 1.1%	0.034658	PPP3CA NPM1 RANBP9 FAM53A RAN ARNTL
positive regulation of immune response	8/539 1.4%	0.034892	CD79B STAT5A STAT5B ZAP70 RIPK2 CCK TLR6 IDO1
ovulation cycle	5/539 0.9%	0.034892	STAT5A STAT5B KITL MSH4 ERBB2
muscle cell development	5/539 0.9%	0.034892	PPP3CA ACTA1 GPX1 F2R ERBB2
chloride transport	5/539 0.9%	0.034892	SLC12A6 GABRG3 BEST3 CLCN2 GABRG2
regulation of adaptive immune response	5/539 0.9%	0.034892	NDFIP1 IFNG RIPK2 CCK IDO1
regulation of adaptive immune response based on somatic recombination of immune receptors built from immunoglobulin superfamily domains	5/539 0.9%	0.034892	NDFIP1 IFNG RIPK2 CCK IDO1
development of primary sexual characteristics	7/539 1.2%	0.035075	STAT5A STAT5B KITL MSH4 CTNNB1 TRP63 BRCA2
cellular response to hormone stimulus	6/539 1.1%	0.035976	STAT5A STAT5B SIK2 PIK3R1 PRKACA SOCS7
forebrain development	9/539 1.6%	0.036052	EXT1 MKKS PGAP1 NFIB CEP120 HESX1 CTNNB1 RBPJ DCLK1
cellular response to lipopolysaccharide	3/539 0.5%	0.036052	RIPK2 CCK MAPK14
regulation of microtubule polymerization or depolymerization	3/539 0.5%	0.036052	MTAP2 MTAP4 CLASP2
regulation of sensory perception of pain	3/539 0.5%	0.036052	F2R CCK RTN4
regulation of sensory perception	3/539 0.5%	0.036052	F2R CCK RTN4
positive regulation of peptidyl-tyrosine phosphorylation	4/539 0.7%	0.036052	IFNG KITL CCK CD44
immune response-regulating signaling pathway	5/539 0.9%	0.036586	CD79B ZAP70 RIPK2 CCK TLR6
regulation of neurological system process	9/539 1.6%	0.037013	NTRK2 PPP3CA EDN1 IFNG F2R ICA1 CCK PRKACA RTN4
positive regulation of transcription, DNA-dependent	17/539 3.1%	0.037093	ATF1 STAT5A STAT5B WWTR1 HLF TRP63 RNF6 MAPK14 PBX1 RUNX2 ARNTL ATXN1 IFNG NFIB CTNNB1 PPARGC1A CKLF
small molecule catabolic process	14/539 2.5%	0.037166	RAB5B RAB4A NOS2 PDE1A AGAP1 RHOA GLS CYP27B1 GNG3 IVD ATP6V1E1 ACADS PFKP IDO1
cellular response to stress	16/539 2.9%	0.037166	GPX1 HLF ARPP21 LRRK1 TRP63 BRCA2 MAPK14 USP28 RHOA RAD51B EEPD1 IFNG ERCC4 MSH4 RAD1 EEF1E1
cellular amine metabolic process	11/539 2.0%	0.037538	SLC22A4 STAT5A SLC5A7 GLUD1 STAT5B HLF NOS2 SHMT2 IVD GLS IDO1
reproductive cellular process	9/539 1.6%	0.037899	STAT5A MKKS KITL KDM1B SPACA3 CTNNB1 TRP63 BRCA2 NR2C2
regulation of cell migration	8/539 1.4%	0.037899	EFNA1 EPB41L5 ACE PIK3R1 PLD1 SCAI RTN4 CCR2
regulation of system process	13/539 2.4%	0.038212	NTRK2 EDN1 NPM1 HLF NOS2 F2R ICA1 CCK RTN4 GLS PPP3CA IFNG PRKACA
B cell differentiation	4/539 0.7%	0.038212	BCL11A PIK3R1 RBPJ FOXP1
regulation of protein complex disassembly	4/539 0.7%	0.038212	MTAP2 DSTN MTAP4 CLASP2
regulation of phospholipase activity	4/539 0.7%	0.038212	ADCYAP1R1 EDN1 F2R PLCD1
immune response-activating cell surface receptor signaling pathway	4/539 0.7%	0.038212	CD79B ZAP70 RIPK2 CCK
positive regulation of lipase activity	4/539 0.7%	0.038212	ADCYAP1R1 EDN1 F2R PLCD1
striated muscle cell differentiation	6/539 1.1%	0.038275	PPP3CA ACTA1 GPX1 F2R ERBB2 FOXP1
glycerophospholipid metabolic process	6/539 1.1%	0.038275	PGAP1 PIGK PIP4K2B PIK3R1 PLD1 SERINC5
ribonucleoprotein complex biogenesis	7/539 1.2%	0.038275	NPM1 NOB1 CELF2 CELF4 RANBP9 PRPF31 GEMIN6
positive regulation of RNA metabolic process	17/539 3.1%	0.038327	ATF1 STAT5A STAT5B WWTR1 HLF TRP63 RNF6 MAPK14 PBX1 RUNX2 ARNTL ATXN1 IFNG NFIB CTNNB1 PPARGC1A CKLF
cellular carbohydrate metabolic process	13/539 2.4%	0.038542	PFKFB3 SORD GDE1 PIK3R1 MAPK14 PPP1CA PPP1CB GNPTG PPP1R3C MGAT2 ST3GAL1 PFKP GALK2
pattern recognition receptor signaling pathway	3/539 0.5%	0.039424	RIPK2 CCK TLR6
lipid localization	7/539 1.2%	0.039656	STAT5A STAT5B GM2A NPC1 OSBPL3 MTTP OSBP2
cell proliferation	11/539 2.0%	0.039688	ITGAM GPX1 RIPK2 CEP120 COL8A2 CTNNB1 TRP63 CSPG4 CCK BRCA2 NR2C2
cellular macromolecular complex assembly	8/539 1.4%	0.039695	ATF1 CELF2 CELF4 PRPF31 GEMIN6 TUBG1 SNAP91 GAS7
induction of apoptosis	8/539 1.4%	0.039695	DFFA CASP7 GPX1 STK17B TRIM35 TRP63 BRCA2 PHLDA1
mesoderm development	5/539 0.9%	0.039695	EXT1 EPB41L5 TRP63 PRKACA DLL3
defense response	16/539 2.9%	0.040168	STAT5B NLRP1A NOS2 RIPK2 IL1R1 F2R CCK RBPJ PLD1 IFNG ALOX5AP CHST1 TLR6 CD44 IDO1 CCR2
regulation of T-helper cell differentiation	2/539 0.3%	0.040168	RIPK2 CCK
response to lipoteichoic acid	2/539 0.3%	0.040168	RIPK2 CCK
positive regulation of survival gene product expression	2/539 0.3%	0.040168	STAT5A STAT5B
positive regulation of activated T cell proliferation	2/539 0.3%	0.040168	STAT5A STAT5B
cellular response to lipoteichoic acid	2/539 0.3%	0.040168	RIPK2 CCK
neutrophil mediated immunity	2/539 0.3%	0.040168	ACE MLL5
mucosal-associated lymphoid tissue development	2/539 0.3%	0.040168	STAT5A STAT5B
positive regulation of chemokine production	2/539 0.3%	0.040168	RIPK2 CCK
induction of programmed cell death	8/539 1.4%	0.040421	DFFA CASP7 GPX1 STK17B TRIM35 TRP63 BRCA2 PHLDA1
amine catabolic process	5/539 0.9%	0.041373	NOS2 IVD DIO3 GLS IDO1
establishment of localization in cell	20/539 3.7%	0.041908	PEX16 NTRK2 NAPB SEC13 NPM1 PGAP1 RANBP9 BRCA2 SNAP91 STXBP5L ARNTL AP3M2 GNPTG PPP3CA NBEA PPP1R3C FAM53A VPS45 SEC22B RAN
ion transmembrane transport	13/539 2.4%	0.042048	SLC22A4 RYR2 KCNK9 HTR3A HTR3B GABRG3 BEST3 GABRG2 SLC8A3 SLC5A7 SLC9A8 ATP6V1H ATP6V1E1
regulation of alpha-beta T cell differentiation	3/539 0.5%	0.042804	ZAP70 RIPK2 CCK
anterior/posterior axis specification	3/539 0.5%	0.042804	EPB41L5 PGAP1 CTNNB1
blood vessel remodeling	3/539 0.5%	0.042804	HLF ITGA4 NOS2
regulation of excitatory postsynaptic membrane potential	3/539 0.5%	0.042804	PPP3CA ATXN1 GHRL
respiratory system development	7/539 1.2%	0.043259	HLF NFIB HESX1 CTNNB1 CLCN2 FOXP1 PPP1CA
tRNA processing	5/539 0.9%	0.043304	TSEN15 TRMT5 TSEN2 RPP38 THG1L
vesicle-mediated transport	17/539 3.1%	0.044378	NAPB SEC13 DENND1A KALRN SNAP91 STXBP5L AP3M2 NBEA NPC1 SH3BP4 CTNNB1 VPS45 CD47 SEC22B RIN2 LRP12 PACSIN1
epithelium development	13/539 2.4%	0.045556	STAT5A EDN1 NPM1 JAG1 GPX1 TRP63 SHROOM3 RBPJ PBX1 RGMA EPB41L5 CTNNB1 CD44
immune response-regulating cell surface receptor signaling pathway	4/539 0.7%	0.045722	CD79B ZAP70 RIPK2 CCK
intracellular transport	15/539 2.7%	0.046222	PEX16 NAPB SEC13 NPM1 PGAP1 RANBP9 ARNTL AP3M2 GNPTG PPP3CA NBEA PPP1R3C FAM53A SEC22B RAN
protein homotetramerization	3/539 0.5%	0.047189	SHMT2 ACADS PFKP
innate immune response-activating signal transduction	3/539 0.5%	0.047189	RIPK2 CCK TLR6
alditol metabolic process	3/539 0.5%	0.047189	SORD GDE1 MGAT2
activation of protein kinase C activity by G-protein coupled receptor protein signaling pathway	3/539 0.5%	0.047189	EDN1 F2R CCK
GTP metabolic process	5/539 0.9%	0.047851	RAB5B RAB4A GNG3 AGAP1 RHOA
calcium ion transport	7/539 1.2%	0.047851	SLC8A3 CYP27B1 RYR2 PPP3CA F2R ITPR1 NFATC1
anti-apoptosis	6/539 1.1%	0.047851	STAT5A STAT5B PRNP BCL2L10 TRP63 GHRL
positive regulation of transport	10/539 1.8%	0.047959	P2RY12 GLUD1 ADCYAP1R1 IFNG F2R GHRL CD47 PRKACA PLCD1 RTN4
regulation of cellular component size	9/539 1.6%	0.048152	NPM1 EMP1 TRP63 DSTN RNF6 ARPC5 DCLK1 RHOA RTN4
positive regulation of interleukin-2 biosynthetic process	2/539 0.3%	0.048461	STAT5A STAT5B
positive regulation of stress-activated MAPK cascade	2/539 0.3%	0.048461	RIPK2 CCK
ribosomal small subunit biogenesis	2/539 0.3%	0.048461	NPM1 NOB1
development of secondary female sexual characteristics	2/539 0.3%	0.048461	STAT5A STAT5B
positive regulation of coagulation	2/539 0.3%	0.048461	F7 F2R
detection of mechanical stimulus involved in sensory perception of sound	2/539 0.3%	0.048461	MKKS GPR98
negative regulation of cell-substrate adhesion	2/539 0.3%	0.048461	ANGPT2 PIK3R1
regulation of T-helper 2 type immune response	2/539 0.3%	0.048461	NDFIP1 IDO1

## Sheet: PFC_E14_Active_Enhancer
Go description	Counts	Corrected p-value	Genes
cellular process	8.2195e-15	106/168 63.0%	VPS29 CRTC3 PGAP3 PMCH ZBTB20 SMC5 AHR TSEN54 NDST2 FBL HHAT SNRPD1 LONP1 NEK2 TNS4 PHLDA1 CDKL2 TOR3A MEF2C SLC30A9 KCNH5 HIC2 ULK3 NUPR1 LLGL2 ASTN1 CDC42SE1 ZCCHC8 DDX5 MTMR3 PSG18 KALRN NDRG1 NUAK2 MAP2 UBR5 IGFBP7 SOCS5 ZFP512 CBX7 CADM3 ZFHX3 ACE BOD1 EPHX2 CIDEA TRAPPC9 SYNJ2 SLC2A9 DLG1 AMACR KITL TCF4 ZCCHC4 RAD18 PNLIPRP2 TRAM1 CDKN1B MAST4 ITGB5 CELF2 DOCK7 PCDHGB2 LIMD1 PPP3CB CCKAR G…
cellular macromolecule metabolic process	2.5069e-08	56/168 33.3%	TRAM1 CRTC3 MAST4 PGAP3 CELF2 ZBTB20 SMC5 AHR LIMD1 TSEN54 NDST2 FBL PPP3CB HHAT SNRPD1 NEK2 PHLDA1 CDKL2 TOR3A MEF2C SLC30A9 CAMK1D PPP1R12A TGIF2 DNMT3A KIF22 HIC2 ULK3 RBM22 ZCCHC8 TRUB2 DDX5 KALRN PPP1R2 NUAK2 MAP2 ICT1 UBR5 PTK2B RUNX1T1 ZFP512 CBX7 ZFHX3 CIDEA ARID3B CHFR HIPK2 KLF7 DLG1 SBK1 WEE2 EIF3K NFIB TRMT5 TCF4 RAD18
cellular metabolic process	1.2429e-07	66/168 39.2%	PNLIPRP2 TRAM1 CRTC3 MAST4 PGAP3 CELF2 ZBTB20 SMC5 AHR LIMD1 TSEN54 NDST2 FBL PPP3CB HHAT SNRPD1 LONP1 NEK2 PHLDA1 CDKL2 TOR3A MEF2C SLC30A9 CAMK1D PPP1R12A TGIF2 DNMT3A KIF22 HIC2 ULK3 RBM22 ZCCHC8 TRUB2 DDX5 MTMR3 PSG18 UQCR10 KALRN PPP1R2 NUAK2 MAP2 ICT1 UBR5 PTK2B RUNX1T1 ZFP512 CBX7 ZFHX3 ACE EPHX2 CIDEA SYNJ2 ARID3B CHFR HIPK2 KLF7 DLG1 AMACR SBK1 WEE2 EIF3K NFIB TRMT5 TCF4 ZCCHC4 RAD18
macromolecule metabolic process	1.4319e-07	58/168 34.5%	TRAM1 CRTC3 MAST4 PGAP3 CELF2 ZBTB20 SMC5 AHR LIMD1 TSEN54 NDST2 FBL PPP3CB HHAT SNRPD1 LONP1 NEK2 PHLDA1 CDKL2 TOR3A MEF2C SLC30A9 CAMK1D PPP1R12A TGIF2 DNMT3A KIF22 HIC2 ULK3 RBM22 ZCCHC8 TRUB2 DDX5 KALRN PPP1R2 NUAK2 MAP2 ICT1 UBR5 PTK2B RUNX1T1 ZFP512 CBX7 ZFHX3 ACE CIDEA ARID3B CHFR HIPK2 KLF7 DLG1 SBK1 WEE2 EIF3K NFIB TRMT5 TCF4 RAD18
metabolic process	4.4432e-06	70/168 41.6%	PNLIPRP2 TRAM1 CRTC3 MAST4 PGAP3 CELF2 ZBTB20 SMC5 AHR LIMD1 TSEN54 NDST2 FBL PPP3CB HHAT SNRPD1 LONP1 NEK2 PHLDA1 CDKL2 TOR3A MEF2C SLC30A9 CAMK1D PPP1R12A TGIF2 DNMT3A KIF22 HIC2 SOAT1 ULK3 RBM22 ZCCHC8 TRUB2 DDX5 MTMR3 PSG18 UQCR10 KALRN PPP1R2 NUAK2 MAP2 ICT1 UBR5 PTK2B RUNX1T1 ZFP512 CBX7 GSTM2 ZFHX3 ACE EPHX2 CIDEA SYNJ2 ARID3B CHFR HIPK2 KLF7 DLG1 AMACR SBK1 WEE2 EIF3K NFIB TRMT5 PNPLA3 PN…
primary metabolic process	6.5001e-06	63/168 37.5%	PNLIPRP2 TRAM1 CRTC3 MAST4 PGAP3 CELF2 ZBTB20 SMC5 AHR LIMD1 TSEN54 NDST2 FBL PPP3CB HHAT SNRPD1 LONP1 NEK2 CDKL2 TOR3A MEF2C SLC30A9 CAMK1D PPP1R12A TGIF2 DNMT3A KIF22 HIC2 SOAT1 ULK3 RBM22 ZCCHC8 TRUB2 DDX5 KALRN PPP1R2 NUAK2 MAP2 ICT1 UBR5 PTK2B RUNX1T1 ZFP512 CBX7 ZFHX3 ACE EPHX2 CIDEA SYNJ2 ARID3B CHFR HIPK2 KLF7 AMACR SBK1 WEE2 EIF3K NFIB TRMT5 PNPLA3 PNPLA5 TCF4 RAD18
positive regulation of biological process	0.00059343	28/168 16.6%	CD63 TRAM1 DDX5 CDKN1B PMCH AHR CCKAR PTK2B PHLDA1 SOCS5 IKBIP IL10 ACTR3 MEF2C ACE TGIF2 CIDEA SORBS1 HIPK2 CD2 KLF7 DLG1 KITL NFIB MAB21L1 CENPK TCF4 NUPR1
nucleic acid metabolic process	0.00062272	32/168 19.0%	ZCCHC8 TRUB2 TRAM1 DDX5 CRTC3 CELF2 ZBTB20 SMC5 AHR LIMD1 TSEN54 FBL SNRPD1 RUNX1T1 ZFP512 CBX7 MEF2C SLC30A9 ZFHX3 TGIF2 DNMT3A CIDEA KIF22 ARID3B HIPK2 HIC2 KLF7 NFIB TRMT5 TCF4 RAD18 RBM22
regulation of metabolic process	0.00067997	37/168 22.0%	TRAM1 DDX5 CDKN1B CRTC3 ZBTB20 AHR LIMD1 GRM3 PPP1R2 PPP3CB GRM4 PTK2B IGFBP7 RUNX1T1 SOCS5 IL10 ZFP512 CBX7 MEF2C SLC30A9 ZFHX3 KCNH5 TGIF2 DNMT3A CIDEA SORBS1 ARID3B HIPK2 HIC2 KLF7 DLG1 EIF3K KITL NFIB CENPK TCF4 RAD18
positive regulation of cellular process	0.0012742	25/168 14.8%	CD63 TRAM1 DDX5 CDKN1B AHR PTK2B PHLDA1 SOCS5 IKBIP IL10 ACTR3 MEF2C ACE TGIF2 SORBS1 HIPK2 CD2 KLF7 DLG1 KITL NFIB MAB21L1 CENPK TCF4 NUPR1
phosphorus metabolic process	0.0014425	18/168 10.7%	CDKL2 MTMR3 CAMK1D PPP1R12A MAST4 EPHX2 UQCR10 SYNJ2 KALRN HIPK2 PPP3CB NUAK2 SBK1 WEE2 MAP2 ULK3 PTK2B NEK2
phosphate metabolic process	0.0014425	18/168 10.7%	CDKL2 MTMR3 CAMK1D PPP1R12A MAST4 EPHX2 UQCR10 SYNJ2 KALRN HIPK2 PPP3CB NUAK2 SBK1 WEE2 MAP2 ULK3 PTK2B NEK2
regulation of cellular metabolic process	0.0016742	34/168 20.2%	TRAM1 DDX5 CDKN1B CRTC3 ZBTB20 AHR LIMD1 GRM3 PPP1R2 GRM4 PTK2B RUNX1T1 SOCS5 IL10 ZFP512 CBX7 MEF2C SLC30A9 ZFHX3 KCNH5 TGIF2 DNMT3A SORBS1 ARID3B HIPK2 HIC2 KLF7 DLG1 EIF3K KITL NFIB CENPK TCF4 RAD18
biological adhesion	0.0016742	13/168 7.7%	MYBPC3 CADM3 PCDHGA5 ITGB5 PCDHGB2 SORBS1 CD2 VCAN KITL PTK2B IGFBP7 ASTN1 JAM3
cell adhesion	0.0016742	13/168 7.7%	MYBPC3 CADM3 PCDHGA5 ITGB5 PCDHGB2 SORBS1 CD2 VCAN KITL PTK2B IGFBP7 ASTN1 JAM3
gene expression	0.0016742	30/168 17.8%	ZCCHC8 TRUB2 TRAM1 DDX5 CRTC3 CELF2 ZBTB20 AHR LIMD1 TSEN54 FBL SNRPD1 ICT1 RUNX1T1 ZFP512 CBX7 MEF2C SLC30A9 ZFHX3 TGIF2 DNMT3A ARID3B HIPK2 HIC2 KLF7 EIF3K NFIB TRMT5 TCF4 RBM22
nucleobase, nucleoside, nucleotide and nucleic acid metabolic process	0.0027416	33/168 19.6%	ZCCHC8 TRUB2 TRAM1 DDX5 CRTC3 CELF2 ZBTB20 SMC5 AHR LIMD1 TSEN54 FBL SNRPD1 LONP1 RUNX1T1 ZFP512 CBX7 MEF2C SLC30A9 ZFHX3 TGIF2 DNMT3A CIDEA KIF22 ARID3B HIPK2 HIC2 KLF7 NFIB TRMT5 TCF4 RAD18 RBM22
biological regulation	0.0027416	65/168 38.6%	TRAM1 CDKN1B CRTC3 PMCH ZBTB20 AHR LIMD1 GRM3 PPP3CB CCKAR GRM4 PHLDA1 IKBIP IL10 MYBPC3 ACTR3 MEF2C SLC30A9 KCNH5 CAMK1D PPP1R12A TGIF2 DNMT3A GLP2R HIC2 CDC42EP4 NUPR1 ARF5 CDC42SE1 CD63 DDX5 PSG18 KALRN PPP1R2 ARHGAP20 MAP2 GPR150 PTK2B IGFBP7 RALGDS RUNX1T1 SOCS5 ZFP512 CBX7 ZFHX3 ACE EPHX2 CIDEA GCG SORBS1 ARID3B HIPK2 SLC8A3 CD2 KLF7 DLG1 TTC7 EIF3K KITL NFIB MAB21L1 CENPK GPR149 TCF4 RAD18
macromolecule modification	0.0029521	20/168 11.9%	CDKL2 TRUB2 CAMK1D PPP1R12A MAST4 PGAP3 DNMT3A KALRN CHFR HIPK2 PPP3CB HHAT NUAK2 SBK1 WEE2 MAP2 UBR5 ULK3 PTK2B NEK2
nitrogen compound metabolic process	0.0038153	35/168 20.8%	ZCCHC8 TRUB2 TRAM1 DDX5 CRTC3 PSG18 CELF2 ZBTB20 SMC5 AHR LIMD1 TSEN54 NDST2 FBL SNRPD1 LONP1 RUNX1T1 ZFP512 CBX7 MEF2C SLC30A9 ZFHX3 TGIF2 DNMT3A CIDEA KIF22 ARID3B HIPK2 HIC2 KLF7 NFIB TRMT5 TCF4 RAD18 RBM22
regulation of biosynthetic process	0.0038535	29/168 17.2%	TRAM1 DDX5 CRTC3 ZBTB20 AHR LIMD1 GRM3 GRM4 PTK2B IGFBP7 RUNX1T1 IL10 ZFP512 CBX7 MEF2C SLC30A9 ZFHX3 KCNH5 TGIF2 DNMT3A SORBS1 ARID3B HIPK2 HIC2 KLF7 EIF3K NFIB CENPK TCF4
regulation of cellular process	0.0042662	59/168 35.1%	TRAM1 CDKN1B CRTC3 PMCH ZBTB20 AHR LIMD1 GRM3 CCKAR GRM4 PHLDA1 IKBIP IL10 ACTR3 MEF2C SLC30A9 KCNH5 CAMK1D PPP1R12A TGIF2 DNMT3A GLP2R HIC2 CDC42EP4 NUPR1 ARF5 CDC42SE1 CD63 DDX5 KALRN PPP1R2 ARHGAP20 MAP2 GPR150 PTK2B IGFBP7 RALGDS RUNX1T1 SOCS5 ZFP512 CBX7 ZFHX3 ACE CIDEA GCG SORBS1 ARID3B HIPK2 CD2 KLF7 DLG1 EIF3K KITL NFIB MAB21L1 CENPK GPR149 TCF4 RAD18
regulation of biological process	0.0046707	61/168 36.3%	TRAM1 CDKN1B CRTC3 PMCH ZBTB20 AHR LIMD1 GRM3 PPP3CB CCKAR GRM4 PHLDA1 IKBIP IL10 MYBPC3 ACTR3 MEF2C SLC30A9 KCNH5 CAMK1D PPP1R12A TGIF2 DNMT3A GLP2R HIC2 CDC42EP4 NUPR1 ARF5 CDC42SE1 CD63 DDX5 KALRN PPP1R2 ARHGAP20 MAP2 GPR150 PTK2B IGFBP7 RALGDS RUNX1T1 SOCS5 ZFP512 CBX7 ZFHX3 ACE CIDEA GCG SORBS1 ARID3B HIPK2 CD2 KLF7 DLG1 EIF3K KITL NFIB MAB21L1 CENPK GPR149 TCF4 RAD18
developmental process	0.0052967	33/168 19.6%	CD63 TRAM1 CDKN1B DOCK7 AHR KALRN PPP3CB HHAT CCKAR MAP2 PTK2B RUNX1T1 BTF3 IL10 MYBPC3 ACTR3 MEF2C ZFHX3 ACE TGIF2 DNMT3A TRAPPC9 ARID3B HIPK2 KLF7 DLG1 VCAN TTC7 COL4A2 KITL NFIB MAB21L1 TCF4
regulation of primary metabolic process	0.0058547	31/168 18.4%	TRAM1 DDX5 CRTC3 ZBTB20 AHR LIMD1 GRM3 GRM4 PTK2B IGFBP7 RUNX1T1 ZFP512 CBX7 MEF2C SLC30A9 ZFHX3 KCNH5 TGIF2 DNMT3A CIDEA SORBS1 ARID3B HIPK2 HIC2 KLF7 EIF3K KITL NFIB CENPK TCF4 RAD18
regulation of cellular biosynthetic process	0.0063454	28/168 16.6%	TRAM1 DDX5 CRTC3 ZBTB20 AHR LIMD1 GRM3 GRM4 PTK2B RUNX1T1 IL10 ZFP512 CBX7 MEF2C SLC30A9 ZFHX3 KCNH5 TGIF2 DNMT3A SORBS1 ARID3B HIPK2 HIC2 KLF7 EIF3K NFIB CENPK TCF4
positive regulation of protein polymerization	0.0063454	3/168 1.7%	ACTR3 DLG1 CDKN1B
multicellular organismal development	0.0066488	31/168 18.4%	CD63 TRAM1 CDKN1B DOCK7 AHR KALRN PPP3CB HHAT CCKAR MAP2 PTK2B BTF3 IL10 MYBPC3 ACTR3 MEF2C ZFHX3 ACE TGIF2 DNMT3A ARID3B HIPK2 KLF7 DLG1 VCAN TTC7 COL4A2 KITL NFIB MAB21L1 TCF4
cellular nitrogen compound metabolic process	0.0079912	33/168 19.6%	ZCCHC8 TRUB2 TRAM1 DDX5 CRTC3 CELF2 ZBTB20 SMC5 AHR LIMD1 TSEN54 FBL SNRPD1 LONP1 RUNX1T1 ZFP512 CBX7 MEF2C SLC30A9 ZFHX3 TGIF2 DNMT3A CIDEA KIF22 ARID3B HIPK2 HIC2 KLF7 NFIB TRMT5 TCF4 RAD18 RBM22
stress fiber assembly	0.0091807	2/168 1.1%	PTK2B SORBS1
protein modification process	0.0091807	18/168 10.7%	CDKL2 CAMK1D PPP1R12A MAST4 PGAP3 KALRN CHFR HIPK2 PPP3CB HHAT NUAK2 SBK1 WEE2 MAP2 UBR5 ULK3 PTK2B NEK2
positive regulation of protein complex assembly	0.010295	3/168 1.7%	ACTR3 DLG1 CDKN1B
regulation of nitrogen compound metabolic process	0.010384	27/168 16.0%	TRAM1 DDX5 CRTC3 ZBTB20 AHR LIMD1 GRM3 GRM4 PTK2B RUNX1T1 IL10 ZFP512 CBX7 MEF2C SLC30A9 ZFHX3 KCNH5 TGIF2 DNMT3A ARID3B HIPK2 HIC2 KLF7 NFIB CENPK TCF4 RAD18
regulation of cellular component organization	0.010452	10/168 5.9%	CDC42SE1 ACTR3 CD63 DLG1 CDKN1B MAP2 CDC42EP4 SORBS1 AHR KALRN
system development	0.011399	26/168 15.4%	CD63 TRAM1 CDKN1B DOCK7 AHR KALRN PPP3CB CCKAR MAP2 PTK2B IL10 MYBPC3 ACTR3 MEF2C ZFHX3 ACE TGIF2 KLF7 DLG1 VCAN TTC7 COL4A2 KITL NFIB MAB21L1 TCF4
regulation of macromolecule metabolic process	0.011399	29/168 17.2%	TRAM1 DDX5 CRTC3 ZBTB20 AHR LIMD1 PPP3CB PTK2B RUNX1T1 IL10 ZFP512 CBX7 MEF2C SLC30A9 ZFHX3 KCNH5 TGIF2 DNMT3A SORBS1 ARID3B HIPK2 HIC2 KLF7 EIF3K KITL NFIB CENPK TCF4 RAD18
protein amino acid phosphorylation	0.01156	12/168 7.1%	CDKL2 NUAK2 CAMK1D SBK1 WEE2 MAST4 MAP2 ULK3 PTK2B NEK2 KALRN HIPK2
regulation of macromolecule biosynthetic process	0.011687	26/168 15.4%	TRAM1 DDX5 CRTC3 ZBTB20 AHR LIMD1 PTK2B RUNX1T1 IL10 ZFP512 CBX7 MEF2C SLC30A9 ZFHX3 KCNH5 TGIF2 DNMT3A SORBS1 ARID3B HIPK2 HIC2 KLF7 EIF3K NFIB CENPK TCF4
actin cytoskeleton organization	0.013973	6/168 3.5%	MYBPC3 CCKAR FMNL2 NCK2 PTK2B SORBS1
cellular macromolecule biosynthetic process	0.015242	25/168 14.8%	TRAM1 CRTC3 PGAP3 ZBTB20 AHR LIMD1 NDST2 HHAT ICT1 PHLDA1 RUNX1T1 ZFP512 CBX7 MEF2C SLC30A9 ZFHX3 TGIF2 DNMT3A ARID3B HIPK2 HIC2 KLF7 EIF3K NFIB TCF4
cellular component organization	0.015242	24/168 14.2%	CDC42SE1 ATPAF2 MYBPC3 CBX7 BOD1 TIMM9 CELF2 DNMT3A CIDEA SORBS1 SYNJ2 KALRN CHFR KLF7 DLG1 CCKAR FMNL2 WEE2 MAP2 ICT1 LONP1 NCK2 PTK2B NEK2
regulation of nucleobase, nucleoside, nucleotide and nucleic acid metabolic process	0.015242	26/168 15.4%	TRAM1 DDX5 CRTC3 ZBTB20 AHR LIMD1 GRM3 GRM4 PTK2B RUNX1T1 ZFP512 CBX7 MEF2C SLC30A9 ZFHX3 KCNH5 TGIF2 DNMT3A ARID3B HIPK2 HIC2 KLF7 NFIB CENPK TCF4 RAD18
negative regulation of biological process	0.015242	21/168 12.5%	CDC42SE1 IL10 CD63 ZFHX3 CDKN1B PMCH DNMT3A CIDEA GCG HIPK2 PPP3CB DLG1 MAP2 KITL NFIB PTK2B TCF4 NUPR1 RAD18 RUNX1T1 SOCS5
regulation of gene expression	0.015242	26/168 15.4%	TRAM1 DDX5 CRTC3 ZBTB20 AHR LIMD1 PPP3CB PTK2B RUNX1T1 IL10 ZFP512 CBX7 MEF2C SLC30A9 ZFHX3 KCNH5 TGIF2 DNMT3A ARID3B HIPK2 HIC2 KLF7 EIF3K NFIB CENPK TCF4
inhibition of adenylate cyclase activity by metabotropic glutamate receptor signaling pathway	0.015242	2/168 1.1%	GRM3 GRM4
macromolecule biosynthetic process	0.015242	25/168 14.8%	TRAM1 CRTC3 PGAP3 ZBTB20 AHR LIMD1 NDST2 HHAT ICT1 PHLDA1 RUNX1T1 ZFP512 CBX7 MEF2C SLC30A9 ZFHX3 TGIF2 DNMT3A ARID3B HIPK2 HIC2 KLF7 EIF3K NFIB TCF4
regulation of protein complex assembly	0.015242	4/168 2.3%	ACTR3 DLG1 CDKN1B AHR
positive regulation of macromolecule biosynthetic process	0.015242	12/168 7.1%	IL10 KLF7 MEF2C TRAM1 DDX5 NFIB CENPK PTK2B TCF4 SORBS1 AHR HIPK2
actin filament-based process	0.015242	6/168 3.5%	MYBPC3 CCKAR FMNL2 NCK2 PTK2B SORBS1
phosphorylation	0.01711	13/168 7.7%	CDKL2 CAMK1D MAST4 UQCR10 KALRN HIPK2 NUAK2 SBK1 WEE2 MAP2 ULK3 PTK2B NEK2
regulation of cell communication	0.017668	14/168 8.3%	CDC42SE1 TRAM1 PMCH CIDEA GCG KALRN GRM3 PPP1R2 CCKAR KITL PTK2B TCF4 RALGDS SOCS5
cellular macromolecular complex subunit organization	0.018208	6/168 3.5%	ATPAF2 MYBPC3 ICT1 CELF2 LONP1 PTK2B
RNA processing	0.018361	9/168 5.3%	ZCCHC8 TRUB2 FBL DDX5 SNRPD1 TRMT5 CELF2 TSEN54 RBM22
cellular protein metabolic process	0.01845	21/168 12.5%	CDKL2 TOR3A CAMK1D PPP1R12A MAST4 PGAP3 KALRN CHFR HIPK2 PPP3CB HHAT NUAK2 SBK1 WEE2 EIF3K MAP2 ICT1 UBR5 ULK3 PTK2B NEK2
intracellular signaling pathway	0.018526	14/168 8.3%	CDC42SE1 GLP2R STAC3 GCG KALRN HIPK2 GRM3 GRM4 CDC42EP4 PTK2B NUPR1 RALGDS ARF5 SOCS5
tRNA processing	0.018526	4/168 2.3%	TRUB2 FBL TRMT5 TSEN54
post-translational protein modification	0.019687	15/168 8.9%	CDKL2 CAMK1D PPP1R12A MAST4 KALRN CHFR HIPK2 PPP3CB NUAK2 SBK1 WEE2 MAP2 ULK3 PTK2B NEK2
positive regulation of cellular component organization	0.019891	6/168 3.5%	ACTR3 CD63 DLG1 CDKN1B SORBS1 AHR
positive regulation of cytoskeleton organization	0.021764	3/168 1.7%	ACTR3 DLG1 CDKN1B
organelle organization	0.022565	15/168 8.9%	MYBPC3 CBX7 BOD1 TIMM9 DNMT3A SORBS1 SYNJ2 CHFR CCKAR FMNL2 WEE2 MAP2 NCK2 PTK2B NEK2
positive regulation of biosynthetic process	0.022619	12/168 7.1%	IL10 KLF7 MEF2C TRAM1 DDX5 NFIB CENPK PTK2B TCF4 SORBS1 AHR HIPK2
positive regulation of macromolecule metabolic process	0.022619	13/168 7.7%	IL10 MEF2C TRAM1 DDX5 SORBS1 AHR HIPK2 KLF7 KITL NFIB CENPK PTK2B TCF4
G-protein signaling, coupled to cAMP nucleotide second messenger	0.023553	4/168 2.3%	GRM3 GRM4 GLP2R GCG
cellular protein complex assembly	0.024328	4/168 2.3%	ATPAF2 MYBPC3 LONP1 PTK2B
anatomical structure development	0.02494	26/168 15.4%	CD63 TRAM1 CDKN1B DOCK7 AHR KALRN PPP3CB CCKAR MAP2 PTK2B IL10 MYBPC3 ACTR3 MEF2C ZFHX3 ACE TGIF2 KLF7 DLG1 VCAN TTC7 COL4A2 KITL NFIB MAB21L1 TCF4
positive regulation of actin filament polymerization	0.029714	2/168 1.1%	ACTR3 DLG1
focal adhesion assembly	0.029714	2/168 1.1%	PTK2B SORBS1
metabotropic glutamate receptor signaling pathway	0.029714	2/168 1.1%	GRM3 GRM4
G-protein signaling, coupled to cyclic nucleotide second messenger	0.029714	4/168 2.3%	GRM3 GRM4 GLP2R GCG
cAMP-mediated signaling	0.030223	4/168 2.3%	GRM3 GRM4 GLP2R GCG
regulation of multicellular organismal process	0.030223	15/168 8.9%	IL10 MYBPC3 ACTR3 CD63 ACE CDKN1B TGIF2 PMCH KALRN GRM3 DLG1 CCKAR KITL PTK2B SOCS5
cytoskeleton organization	0.032728	7/168 4.1%	MYBPC3 CCKAR FMNL2 MAP2 NCK2 PTK2B SORBS1
regulation of biological quality	0.032728	17/168 10.1%	CDC42SE1 MYBPC3 ACTR3 ACE PSG18 EPHX2 PMCH CIDEA GCG SLC8A3 PPP3CB DLG1 CCKAR TTC7 CDC42EP4 PTK2B SOCS5
regulation of molecular function	0.032728	13/168 7.7%	MEF2C TRAM1 CDKN1B HIPK2 GRM3 PPP1R2 DLG1 CCKAR GRM4 KITL PTK2B RUNX1T1 SOCS5
DNA damage response, signal transduction by p53 class mediator resulting in induction of apoptosis	0.032728	2/168 1.1%	NUPR1 HIPK2
organ development	0.032728	20/168 11.9%	IL10 MYBPC3 CD63 MEF2C TRAM1 ZFHX3 CDKN1B TGIF2 AHR PPP3CB DLG1 VCAN CCKAR TTC7 COL4A2 KITL NFIB MAB21L1 PTK2B TCF4
negative regulation of immune system process	0.032728	4/168 2.3%	IL10 PPP3CB DLG1 SOCS5
negative regulation of cellular process	0.032728	18/168 10.7%	CDC42SE1 IL10 CD63 ZFHX3 CDKN1B PMCH DNMT3A CIDEA HIPK2 DLG1 MAP2 KITL NFIB TCF4 NUPR1 RAD18 RUNX1T1 SOCS5
transcription	0.032913	19/168 11.3%	ZFP512 CBX7 MEF2C TRAM1 SLC30A9 ZFHX3 CRTC3 TGIF2 DNMT3A ZBTB20 AHR ARID3B LIMD1 HIPK2 HIC2 KLF7 NFIB TCF4 RUNX1T1
cyclic-nucleotide-mediated signaling	0.034404	4/168 2.3%	GRM3 GRM4 GLP2R GCG
regulation of localization	0.0358	11/168 6.5%	CD63 DLG1 ACE CDKN1B CCKAR PPP1R12A CIDEA PTK2B GCG TCF4 SORBS1
regulation of developmental process	0.03611	12/168 7.1%	CDC42SE1 ACTR3 DLG1 ACE CDKN1B TGIF2 KITL CDC42EP4 PTK2B TCF4 KALRN SOCS5
cellular macromolecular complex assembly	0.03611	5/168 2.9%	ATPAF2 MYBPC3 CELF2 LONP1 PTK2B
elevation of cytosolic calcium ion concentration	0.041333	4/168 2.3%	SLC8A3 CCKAR PMCH PTK2B
regulation of transcription	0.041333	22/168 13.0%	ZFP512 CBX7 MEF2C TRAM1 SLC30A9 DDX5 ZFHX3 CRTC3 KCNH5 TGIF2 DNMT3A ZBTB20 AHR ARID3B LIMD1 HIPK2 HIC2 KLF7 NFIB CENPK TCF4 RUNX1T1
positive regulation of metabolic process	0.041333	13/168 7.7%	IL10 MEF2C TRAM1 DDX5 SORBS1 AHR HIPK2 KLF7 KITL NFIB CENPK PTK2B TCF4
positive regulation of cellular biosynthetic process	0.044995	11/168 6.5%	KLF7 MEF2C TRAM1 DDX5 NFIB CENPK PTK2B TCF4 SORBS1 AHR HIPK2

## Sheet: PFC_Myt1l_H3K27ac_Up
Go description	Counts	Corrected p-value	Genes
cellular process	6.1706e-09	117/220 53.1%	EPHB6 TXN1 LPGAT1 YEATS4 UBE3A RBPJ TXN2 RPS14 RNF114 GNPTAB DPYSL2 NAMPT SLC39A6 SLC25A40 NEK2 SEC62 PIAS3 USP4 ISLR2 ARID5B RPSA ATP5J2 FCGR1 RINT1 SLC9A8 RIN1 FKBP3 GPM6A SEMA7A PFKFB3 DHX9 MFI2 ITPR1 GTF2E1 CYP11A1 EP400 ATP6V1H LRRC4C MARK1 SRPK2 CPSF3 MLL5 PBX1 GDF7 KITL RPS29 CDK4 RPL27A LCN2 TCF4 MAP3K13 SFXN5 LRP12 SLC25A3 MTMR11 CHD9 RPLP1 TGFB1I1 HIST2H2AB HSCB CHD3 ADRA1A HIST2H2AC PP…
localization	8.823e-06	48/220 21.8%	TXN1 GPM6A SLC25A3 LRP1 PITPNB MFI2 ITPR1 UBE3A TXN2 LAPTM4A CCKAR GNPTAB SPR SV2A DPYSL2 SLC39A6 SLC25A40 ATP6V1H SEC62 SLC25A25 RAB11FIP5 STRA6 KCND2 PTGES2 ARID5B MUP5 CCK GFRA3 DNM1 PML RHOB STXBP5L ATP5J2 FCGR1 RAB10 RINT1 ZEB2 ALS2 KITL STIM2 SLC9A8 TOMM7 LCN2 CD47 RIN1 NUPL2 SFXN5 LRP12
cellular component organization	1.6584e-05	39/220 17.7%	SMARCD3 LRP1 CHD9 HIST2H2AB YEATS4 UBE3A CHD3 RBPJ GTF2E1 HIST2H2AC RPS14 CCKAR SPR SLITRK4 EP400 HIST1H1D NEK2 DIAP1 MARK1 SRPK2 KCND2 APAF1 EED CCK GFRA3 MLL5 HIST2H2BE DNM1 PML GDF7 FCGR1 TTC8 FMNL2 ALS2 LCN2 PMP22 CD47 RIN1 LRP12
transport	1.6584e-05	43/220 19.5%	TXN1 GPM6A SLC25A3 LRP1 PITPNB MFI2 ITPR1 UBE3A TXN2 LAPTM4A CCKAR GNPTAB SPR SV2A DPYSL2 SLC39A6 SLC25A40 ATP6V1H SEC62 SLC25A25 RAB11FIP5 STRA6 KCND2 PTGES2 MUP5 DNM1 PML RHOB STXBP5L ATP5J2 FCGR1 RAB10 RINT1 ALS2 STIM2 SLC9A8 TOMM7 LCN2 CD47 RIN1 NUPL2 SFXN5 LRP12
establishment of localization	1.6704e-05	43/220 19.5%	TXN1 GPM6A SLC25A3 LRP1 PITPNB MFI2 ITPR1 UBE3A TXN2 LAPTM4A CCKAR GNPTAB SPR SV2A DPYSL2 SLC39A6 SLC25A40 ATP6V1H SEC62 SLC25A25 RAB11FIP5 STRA6 KCND2 PTGES2 MUP5 DNM1 PML RHOB STXBP5L ATP5J2 FCGR1 RAB10 RINT1 ALS2 STIM2 SLC9A8 TOMM7 LCN2 CD47 RIN1 NUPL2 SFXN5 LRP12
cell differentiation	0.0032339	30/220 13.6%	SEMA7A SMARCD3 TGFB1I1 RBPJ PPP3CB RNF114 CCKAR GNPTAB SPR DPYSL2 SLITRK4 HS1BP3 LRRC4C SRPK2 EMX1 ISLR2 CCK GFRA3 MLL5 PBX1 PML GDF7 RHOB ZEB2 TTC8 ALS2 KITL PMP22 TCF4 TRIM32
chromatin organization	0.0032339	11/220 5.0%	SMARCD3 CHD9 EED HIST2H2AB EP400 HIST1H1D YEATS4 CHD3 MLL5 HIST2H2BE HIST2H2AC
chromatin assembly or disassembly	0.0034717	6/220 2.7%	CHD9 HIST2H2AB HIST1H1D CHD3 HIST2H2BE HIST2H2AC
chromosome organization	0.0035258	12/220 5.4%	SMARCD3 CHD9 EED HIST2H2AB EP400 HIST1H1D YEATS4 NEK2 CHD3 MLL5 HIST2H2BE HIST2H2AC
cellular developmental process	0.0035626	30/220 13.6%	SEMA7A SMARCD3 TGFB1I1 RBPJ PPP3CB RNF114 CCKAR GNPTAB SPR DPYSL2 SLITRK4 HS1BP3 LRRC4C SRPK2 EMX1 ISLR2 CCK GFRA3 MLL5 PBX1 PML GDF7 RHOB ZEB2 TTC8 ALS2 KITL PMP22 TCF4 TRIM32
cellular homeostasis	0.0036698	13/220 5.9%	TXN1 KCND2 PTGES2 MFI2 ITPR1 ADRA1A PML TXN2 CCKAR SPR SV2A SLC9A8 PMP22
macromolecular complex assembly	0.0052296	12/220 5.4%	SRPK2 RPS14 KCND2 APAF1 ALS2 HIST2H2AB LCN2 HIST1H1D DIAP1 GTF2E1 HIST2H2BE HIST2H2AC
activation of caspase activity	0.0057316	4/220 1.8%	APAF1 CCK IFT57 PML
macromolecular complex subunit organization	0.0089736	12/220 5.4%	SRPK2 RPS14 KCND2 APAF1 ALS2 HIST2H2AB LCN2 HIST1H1D DIAP1 GTF2E1 HIST2H2BE HIST2H2AC
organelle organization	0.011804	20/220 9.0%	SMARCD3 CHD9 EED HIST2H2AB YEATS4 CCK CHD3 MLL5 HIST2H2BE PML HIST2H2AC RPS14 CCKAR FMNL2 ALS2 EP400 HIST1H1D NEK2 DIAP1 MARK1
positive regulation of caspase activity	0.011804	4/220 1.8%	APAF1 CCK IFT57 PML
voluntary musculoskeletal movement	0.015145	2/220 0.9%	SPR ITPR1
cellular macromolecular complex assembly	0.015938	7/220 3.1%	SRPK2 RPS14 HIST2H2AB HIST1H1D DIAP1 HIST2H2BE HIST2H2AC
developmental process	0.01742	39/220 17.7%	SEMA7A SMARCD3 LRP1 PITPNB TGFB1I1 ITPR1 UBE3A RBPJ ADRA1A APH1A PPP3CB RNF114 CCKAR GNPTAB SPR DPYSL2 SLITRK4 HS1BP3 LRRC4C SRPK2 EMX1 APAF1 ISLR2 ARID5B CCK ARID3B GFRA3 MLL5 PBX1 PML GDF7 RHOB ZEB2 TTC8 ALS2 KITL PMP22 TCF4 TRIM32
nervous system development	0.01742	19/220 8.6%	EMX1 SEMA7A SMARCD3 APAF1 ISLR2 CCK RBPJ GFRA3 PBX1 GDF7 ZEB2 CCKAR SPR ALS2 DPYSL2 SLITRK4 PMP22 TCF4 LRRC4C
homeostatic process	0.019116	15/220 6.8%	TXN1 KCND2 PTGES2 MFI2 ITPR1 MLL5 ADRA1A PML TXN2 PPP3CB CCKAR SPR SV2A SLC9A8 PMP22
cellular metabolic process	0.020036	62/220 28.1%	EPHB6 TXN1 LPGAT1 MTMR11 CHD9 RPLP1 YEATS4 UBE3A HSCB TXN2 RPS14 PPP3CB 0610009D07RIK GNPTAB SPR NAMPT NEK2 IFT57 PIAS3 APAF1 HMGCS1 USP4 EED ARID5B RPSA DNM1 ATP5J2 ZEB2 DBF4 ALS2 EHHADH CANX FKBP3 DTL SF3B4 PFKFB3 SMARCD3 GTF2E1 CYP11A1 NRIP2 ATP6V1H D2HGDH CCT7 MARK1 SRPK2 USP25 PTGES2 GSS CPSF3 CCK ARID3B MLL5 PBX1 PML RPS29 CDK4 RPL27A RAD1 TCF4 MAP3K13 TRIM32 EIF3B
cellular cation homeostasis	0.020036	8/220 3.6%	CCKAR SPR SV2A MFI2 SLC9A8 ITPR1 ADRA1A PML
cellular component assembly	0.020036	13/220 5.9%	SRPK2 KCND2 APAF1 HIST2H2AB GTF2E1 HIST2H2BE HIST2H2AC RPS14 ALS2 LCN2 HIST1H1D PMP22 DIAP1
positive regulation of action potential	0.020036	2/220 0.9%	SPR ADRA1A
positive regulation of peptidase activity	0.020036	4/220 1.8%	APAF1 CCK IFT57 PML
cellular ion homeostasis	0.020299	10/220 4.5%	CCKAR KCND2 SPR SV2A MFI2 SLC9A8 ITPR1 PMP22 ADRA1A PML
response to heat	0.020299	4/220 1.8%	CCKAR SPR DHX9 TGFB1I1
nucleosome assembly	0.021012	4/220 1.8%	HIST2H2AB HIST1H1D HIST2H2BE HIST2H2AC
cellular protein metabolic process	0.021012	26/220 11.8%	EPHB6 RPLP1 UBE3A HSCB RPS14 PPP3CB NEK2 D2HGDH CCT7 MARK1 SRPK2 PIAS3 USP25 USP4 EED RPSA CCK PML RPS29 CDK4 RPL27A CANX MAP3K13 FKBP3 TRIM32 EIF3B
cellular chemical homeostasis	0.021012	10/220 4.5%	CCKAR KCND2 SPR SV2A MFI2 SLC9A8 ITPR1 PMP22 ADRA1A PML
nucleosome organization	0.021012	4/220 1.8%	HIST2H2AB HIST1H1D HIST2H2BE HIST2H2AC
chromatin assembly	0.021595	4/220 1.8%	HIST2H2AB HIST1H1D HIST2H2BE HIST2H2AC
cellular macromolecular complex subunit organization	0.021595	7/220 3.1%	SRPK2 RPS14 HIST2H2AB HIST1H1D DIAP1 HIST2H2BE HIST2H2AC
negative regulation of Rho protein signal transduction	0.024276	2/220 0.9%	ARAP3 ADRA1A
protein-DNA complex assembly	0.025555	4/220 1.8%	HIST2H2AB HIST1H1D HIST2H2BE HIST2H2AC
ion homeostasis	0.027584	10/220 4.5%	CCKAR KCND2 SPR SV2A MFI2 SLC9A8 ITPR1 PMP22 ADRA1A PML
cell morphogenesis involved in differentiation	0.027584	8/220 3.6%	CCKAR SPR ALS2 SLITRK4 CCK RBPJ GFRA3 GDF7
cation homeostasis	0.027584	8/220 3.6%	CCKAR SPR SV2A MFI2 SLC9A8 ITPR1 ADRA1A PML
metabolic process	0.027584	70/220 31.8%	EPHB6 TXN1 LPGAT1 MTMR11 CHD9 RPLP1 YEATS4 UBE3A HSCB LOXL1 TXN2 RPS14 PPP3CB 0610009D07RIK GNPTAB SPR NAMPT NEK2 IFT57 PIAS3 IAH1 APAF1 HMGCS1 USP4 EED ARID5B RPSA DNM1 ATP5J2 ZEB2 DBF4 ALS2 EHHADH CANX FKBP3 DTL B4GALT5 SF3B4 PFKFB3 SMARCD3 NAA20 GTF2E1 APH1A CYP11A1 NRIP2 ATP6V1H D2HGDH CCT7 MARK1 SRPK2 USP25 PTGES2 GSS CPSF3 B3GAT1 CCK ARID3B DDHD1 MLL5 PBX1 PML UCK1 RPS29 CDK4 RPL27A RAD1 TC…
cellular macromolecule metabolic process	0.030304	47/220 21.3%	EPHB6 SF3B4 SMARCD3 CHD9 RPLP1 YEATS4 UBE3A HSCB GTF2E1 RPS14 PPP3CB 0610009D07RIK NRIP2 NEK2 D2HGDH CCT7 IFT57 MARK1 SRPK2 PIAS3 USP25 APAF1 USP4 EED CPSF3 ARID5B RPSA CCK ARID3B MLL5 PBX1 DNM1 PML ZEB2 DBF4 ALS2 RPS29 CDK4 RPL27A CANX RAD1 TCF4 MAP3K13 FKBP3 DTL TRIM32 EIF3B
positive regulation of biological process	0.030711	27/220 12.2%	SMARCD3 LRP1 UBE3A RBPJ ADRA1A CCKAR SPR DPYSL2 NAMPT IKBIP APAF1 PTGES2 ISLR2 CCK PBX1 PML GDF7 RHOB FCGR1 ZEB2 KITL CDK4 LCN2 TRIM35 TCF4 CD47 TRIM32
membrane invagination	0.030711	7/220 3.1%	FCGR1 LRP1 UBE3A CD47 RIN1 LRP12 DNM1
endocytosis	0.030711	7/220 3.1%	FCGR1 LRP1 UBE3A CD47 RIN1 LRP12 DNM1
system development	0.030711	30/220 13.6%	SEMA7A SMARCD3 TGFB1I1 UBE3A RBPJ ADRA1A APH1A PPP3CB CCKAR SPR DPYSL2 SLITRK4 HS1BP3 LRRC4C EMX1 APAF1 ISLR2 ARID5B CCK GFRA3 MLL5 PBX1 PML GDF7 RHOB ZEB2 ALS2 KITL PMP22 TCF4
multicellular organismal development	0.030711	35/220 15.9%	SEMA7A SMARCD3 LRP1 PITPNB TGFB1I1 ITPR1 UBE3A RBPJ ADRA1A APH1A PPP3CB RNF114 CCKAR SPR DPYSL2 SLITRK4 HS1BP3 LRRC4C EMX1 APAF1 ISLR2 ARID5B CCK ARID3B GFRA3 MLL5 PBX1 PML GDF7 RHOB ZEB2 ALS2 KITL PMP22 TCF4
cellular di-, tri-valent inorganic cation homeostasis	0.030711	7/220 3.1%	CCKAR SPR SV2A MFI2 ITPR1 ADRA1A PML
regulation of caspase activity	0.031219	4/220 1.8%	APAF1 CCK IFT57 PML
regulation of molecular function	0.032329	16/220 7.2%	SMARCD3 APAF1 LRP1 ARAP3 CCK ADRA1A PML GRM3 ZEB2 CCKAR ALS2 KITL ANP32E RGS20 DENND5A IFT57
cell morphogenesis involved in neuron differentiation	0.032329	7/220 3.1%	CCKAR SPR ALS2 SLITRK4 CCK GFRA3 GDF7
regulation of biological quality	0.032696	21/220 9.5%	TXN1 KCND2 PTGES2 MFI2 ITPR1 ISLR2 ARAP3 CCK ARPC5 MLL5 ADRA1A PML TXN2 PPP3CB CCKAR SPR CYP11A1 CDK4 SV2A SLC9A8 PMP22
generation of neurons	0.03483	13/220 5.9%	EMX1 ISLR2 CCK RBPJ GFRA3 PBX1 GDF7 CCKAR SPR ALS2 DPYSL2 SLITRK4 LRRC4C
vesicle-mediated transport	0.037237	11/220 5.0%	FCGR1 RINT1 ALS2 LRP1 DPYSL2 UBE3A CD47 RIN1 LRP12 DNM1 STXBP5L
di-, tri-valent inorganic cation homeostasis	0.037245	7/220 3.1%	CCKAR SPR SV2A MFI2 ITPR1 ADRA1A PML
primary metabolic process	0.040191	61/220 27.7%	EPHB6 LPGAT1 CHD9 RPLP1 YEATS4 UBE3A HSCB RPS14 PPP3CB 0610009D07RIK GNPTAB SPR NAMPT NEK2 IFT57 PIAS3 IAH1 APAF1 HMGCS1 USP4 EED ARID5B RPSA ATP5J2 ZEB2 DBF4 EHHADH CANX FKBP3 DTL B4GALT5 SF3B4 PFKFB3 SMARCD3 GTF2E1 APH1A CYP11A1 NRIP2 ATP6V1H D2HGDH CCT7 MARK1 SRPK2 USP25 PTGES2 GSS CPSF3 CCK ARID3B DDHD1 MLL5 PBX1 PML RPS29 CDK4 RPL27A RAD1 TCF4 MAP3K13 TRIM32 EIF3B
receptor-mediated endocytosis	0.040191	3/220 1.3%	FCGR1 LRP1 DNM1
cellular component biogenesis	0.040191	13/220 5.9%	SRPK2 KCND2 APAF1 HIST2H2AB GTF2E1 HIST2H2BE HIST2H2AC RPS14 ALS2 LCN2 HIST1H1D PMP22 DIAP1
cellular calcium ion homeostasis	0.042378	6/220 2.7%	CCKAR SPR SV2A ITPR1 ADRA1A PML
positive regulation of hydrolase activity	0.043552	5/220 2.2%	APAF1 CCK IFT57 ADRA1A PML
response to temperature stimulus	0.043552	4/220 1.8%	CCKAR SPR DHX9 TGFB1I1
regulation of catalytic activity	0.043552	14/220 6.3%	APAF1 LRP1 ARAP3 CCK ADRA1A PML GRM3 ZEB2 ALS2 KITL ANP32E RGS20 DENND5A IFT57
eating behavior	0.043552	3/220 1.3%	CCKAR SPR CCK
calcium ion homeostasis	0.043552	6/220 2.7%	CCKAR SPR SV2A ITPR1 ADRA1A PML
anatomical structure morphogenesis	0.043552	19/220 8.6%	SMARCD3 APAF1 TGFB1I1 ARID5B CCK RBPJ GFRA3 ADRA1A PBX1 PML GDF7 RHOB ZEB2 CCKAR SPR ALS2 SLITRK4 PMP22 TCF4
DNA packaging	0.046414	4/220 1.8%	HIST2H2AB HIST1H1D HIST2H2BE HIST2H2AC
neurogenesis	0.047636	13/220 5.9%	EMX1 ISLR2 CCK RBPJ GFRA3 PBX1 GDF7 CCKAR SPR ALS2 DPYSL2 SLITRK4 LRRC4C

## Sheet: PFC_Myt1l_H3K27ac_Down
Go description	Corrected p-value	Counts	Genes
cellular process	5.4771e-12	89/142 62.6%	IPO13 LIN54 CELF2 DENND1A USP33 RPLP0 NGLY1 DIXDC1 CLTB ADAR TRIAP1 PCM1 PCLO SDF4 ANXA7 SCD1 IFT57 SIL1 ACADS TNS1 NUP133 RMI1 ELOVL2 TCF12 SIRT4 EPDR1 ZDHHC13 NUTF2 RFX1 DYNLL1 KIF27 SREBF2 PGM2L1 ACTA1 AEBP2 MTAP2 CD47 STK40 SRSF9 CSNK1G1 PXK FIGF PXN KCNA4 PIK3R1 ACAA1A PMF1 TAF5L RTN4 MED12L INPP5A HSPH1 MAP2 DVL1 SNRPB2 STX2 METTL8 VTI1B YARS ESRRA PEX16 CHGA NEK9 ZFHX3 XRCC5 TIPARP GALNT2 …
cellular metabolic process	1.0088e-07	59/142 41.5%	LIN54 CELF2 USP33 RPLP0 NGLY1 ADAR PCM1 SCD1 IFT57 ACADS RMI1 ELOVL2 TCF12 SIRT4 RFX1 DYNLL1 SREBF2 PGM2L1 AEBP2 MTAP2 STK40 SRSF9 CSNK1G1 PXK PXN PIK3R1 ACAA1A PMF1 TAF5L MED12L INPP5A HSPH1 MAP2 DVL1 SNRPB2 METTL8 YARS ESRRA NEK9 ZFHX3 XRCC5 TIPARP GALNT2 CSNK1A1 TAF13 IDH1 CAV1 USP22 MTHFR SMARCA2 RCL1 CDK8 ZFP322A KLF6 HNRNPK GNAL TAF4B TAF2 PFKP
primary metabolic process	1.0746e-07	60/142 42.2%	LIN54 CELF2 USP33 RPLP0 ADAR PCM1 SCD1 IFT57 ACADS TNS1 RMI1 ELOVL2 TCF12 SIRT4 RFX1 DYNLL1 SREBF2 PGM2L1 AEBP2 MTAP2 STK40 SRSF9 CSNK1G1 PXK PXN PIK3R1 ACAA1A PMF1 TAF5L MED12L INPP5A HSPH1 MAP2 MLEC SNRPB2 METTL8 YARS ESRRA NEK9 ZFHX3 XRCC5 TIPARP GALNT2 CSNK1A1 TAF13 IDH1 CAV1 USP22 MTHFR 5133401N09RIK SMARCA2 RCL1 CDK8 ZFP322A KLF6 HNRNPK GNAL TAF4B TAF2 PFKP
cellular macromolecule metabolic process	1.4982e-07	48/142 33.8%	LIN54 PXK CELF2 USP33 PXN RPLP0 NGLY1 ADAR PIK3R1 PMF1 TAF5L MED12L PCM1 HSPH1 MAP2 DVL1 SNRPB2 IFT57 METTL8 YARS ESRRA NEK9 ZFHX3 XRCC5 TIPARP RMI1 GALNT2 CSNK1A1 TAF13 USP22 TCF12 SIRT4 RFX1 DYNLL1 SMARCA2 SREBF2 RCL1 CDK8 ZFP322A KLF6 HNRNPK AEBP2 MTAP2 TAF4B STK40 TAF2 SRSF9 CSNK1G1
metabolic process	3.6319e-07	64/142 45.0%	LIN54 CELF2 USP33 RPLP0 NGLY1 ADAR PCM1 SCD1 IFT57 ACADS TNS1 RMI1 ELOVL2 TCF12 SIRT4 ZDHHC13 RFX1 DYNLL1 SREBF2 PGM2L1 AEBP2 MTAP2 STK40 SRSF9 CSNK1G1 PXK PXN PIK3R1 ACAA1A PMF1 TAF5L MED12L INPP5A HSPH1 MAP2 DVL1 MLEC SNRPB2 METTL8 YARS ESRRA NEK9 ZFHX3 XRCC5 TIPARP GALNT2 CSNK1A1 TAF13 IDH1 CAV1 USP22 MTHFR 5133401N09RIK SMARCA2 RCL1 CDK8 ZFP322A KLF6 HNRNPK GNAL ECHDC1 TAF4B TAF2 PFKP
macromolecule metabolic process	1.7907e-06	49/142 34.5%	LIN54 CELF2 USP33 RPLP0 NGLY1 ADAR PCM1 IFT57 TNS1 RMI1 TCF12 SIRT4 RFX1 DYNLL1 SREBF2 AEBP2 MTAP2 STK40 SRSF9 CSNK1G1 PXK PXN PIK3R1 PMF1 TAF5L MED12L HSPH1 MAP2 DVL1 SNRPB2 METTL8 YARS ESRRA NEK9 ZFHX3 XRCC5 TIPARP GALNT2 CSNK1A1 TAF13 USP22 SMARCA2 RCL1 CDK8 ZFP322A KLF6 HNRNPK TAF4B TAF2
nucleic acid metabolic process	0.00012615	30/142 21.1%	LIN54 CELF2 ADAR PMF1 TAF5L MED12L PCM1 SNRPB2 IFT57 YARS ESRRA ZFHX3 XRCC5 RMI1 TAF13 USP22 TCF12 RFX1 DYNLL1 SMARCA2 SREBF2 RCL1 CDK8 ZFP322A KLF6 HNRNPK AEBP2 TAF4B TAF2 SRSF9
regulation of cellular metabolic process	0.00014422	33/142 23.2%	LIN54 PXK PXN ADAR PIK3R1 PMF1 TAF5L MED12L RPTOR PCM1 RAB23 SCD1 IFT57 ESRRA ZFHX3 TAF13 CAV1 USP22 TCF12 SIRT4 GATC RFX1 DYNLL1 SMARCA2 SREBF2 RGMA CDK8 ZFP322A KLF6 GNAL AEBP2 TAF4B TAF2
cellular component organization	0.00014422	27/142 19.0%	CELF2 DENND1A USP33 PXN PMF1 RTN4 PCM1 PCLO MAP2 DVL1 ANXA7 STX2 METTL8 ACADS TNS1 PEX16 CHGA NEK9 CSNK1A1 CAV1 USP22 SMARCA2 AEBP2 MTAP2 CCDC64 CD47 PFKP
gene expression	0.00019912	29/142 20.4%	LIN54 CELF2 RPLP0 ADAR PMF1 TAF5L MED12L PCM1 SNRPB2 IFT57 YARS ESRRA ZFHX3 TAF13 USP22 TCF12 RFX1 DYNLL1 SMARCA2 SREBF2 RCL1 CDK8 ZFP322A KLF6 HNRNPK AEBP2 TAF4B TAF2 SRSF9
regulation of primary metabolic process	0.00034556	31/142 21.8%	LIN54 PXK ADAR PIK3R1 PMF1 TAF5L MED12L PCM1 RAB23 SCD1 IFT57 ESRRA ZFHX3 TAF13 CAV1 USP22 TCF12 SIRT4 GATC RFX1 DYNLL1 SMARCA2 SREBF2 RGMA CDK8 ZFP322A KLF6 GNAL AEBP2 TAF4B TAF2
regulation of metabolic process	0.00038977	33/142 23.2%	LIN54 PXK PXN ADAR PIK3R1 PMF1 TAF5L MED12L RPTOR PCM1 RAB23 SCD1 IFT57 ESRRA ZFHX3 TAF13 CAV1 USP22 TCF12 SIRT4 GATC RFX1 DYNLL1 SMARCA2 SREBF2 RGMA CDK8 ZFP322A KLF6 GNAL AEBP2 TAF4B TAF2
cellular localization	0.00038977	14/142 9.8%	IPO13 PEX16 NUP133 LRBA CAV1 CLTB NUTF2 PCM1 PCLO DVL1 SDF4 CCDC64 STX2 VTI1B
regulation of cellular process	0.00038977	55/142 38.7%	LIN54 DIXDC1 ADAR NRGN RPTOR PCM1 PCLO NKIRAS2 ANXA7 SCD1 IFT57 FGFBP3 TNS1 TMOD3 TCF12 SIRT4 RFX1 DYNLL1 SREBF2 RGMA AEBP2 RAB35 MTAP2 CD47 PXK FIGF PXN KCNA4 PIK3R1 PMF1 TAF5L RTN4 MED12L OLFR624 MAP2 RAB23 SRGAP2 ESRRA ZFHX3 XRCC5 TAF13 LRBA CAV1 USP22 GATC DDIT4L SMARCA2 ARHGAP24 CDK8 ZFP322A KLF6 GNAL GKAP1 TAF4B TAF2
biological regulation	0.00048396	59/142 41.5%	LIN54 DIXDC1 ADAR NRGN RPTOR PCM1 PCLO NKIRAS2 ANXA7 SCD1 IFT57 FGFBP3 TNS1 TMOD3 TCF12 SIRT4 RFX1 DYNLL1 SREBF2 RGMA AEBP2 RAB35 MTAP2 PSME2 CD47 PXK FIGF PXN KCNA4 PIK3R1 PMF1 TAF5L RTN4 MED12L OLFR624 MAP2 RAB23 DVL1 SRGAP2 ESRRA ZFHX3 XRCC5 TIPARP TAF13 LRBA CAV1 USP22 GATC DDIT4L SMARCA2 ARHGAP24 CDK8 ZFP322A KLF6 GNAL GKAP1 TAF4B CCDC64 TAF2
nucleobase, nucleoside, nucleotide and nucleic acid metabolic process	0.00048396	31/142 21.8%	LIN54 CELF2 ADAR PMF1 TAF5L MED12L PCM1 SNRPB2 IFT57 YARS ESRRA ZFHX3 XRCC5 RMI1 TAF13 USP22 TCF12 RFX1 DYNLL1 SMARCA2 SREBF2 RCL1 CDK8 ZFP322A KLF6 HNRNPK GNAL AEBP2 TAF4B TAF2 SRSF9
transcription	0.00052944	22/142 15.4%	ESRRA LIN54 ZFHX3 TAF13 USP22 TCF12 ADAR RFX1 DYNLL1 PMF1 SMARCA2 TAF5L MED12L SREBF2 CDK8 ZFP322A PCM1 KLF6 AEBP2 TAF4B IFT57 TAF2
nitrogen compound metabolic process	0.00054403	33/142 23.2%	LIN54 CELF2 ADAR PMF1 TAF5L MED12L PCM1 SNRPB2 IFT57 YARS ESRRA ZFHX3 XRCC5 TIPARP RMI1 TAF13 USP22 TCF12 MTHFR RFX1 DYNLL1 SMARCA2 SREBF2 RCL1 CDK8 ZFP322A KLF6 HNRNPK GNAL AEBP2 TAF4B TAF2 SRSF9
cellular macromolecule biosynthetic process	0.00063124	26/142 18.3%	LIN54 RPLP0 ADAR PMF1 TAF5L MED12L PCM1 IFT57 YARS ESRRA ZFHX3 RMI1 GALNT2 TAF13 USP22 TCF12 RFX1 DYNLL1 SMARCA2 SREBF2 CDK8 ZFP322A KLF6 AEBP2 TAF4B TAF2
macromolecule biosynthetic process	0.00065188	26/142 18.3%	LIN54 RPLP0 ADAR PMF1 TAF5L MED12L PCM1 IFT57 YARS ESRRA ZFHX3 RMI1 GALNT2 TAF13 USP22 TCF12 RFX1 DYNLL1 SMARCA2 SREBF2 CDK8 ZFP322A KLF6 AEBP2 TAF4B TAF2
cellular nitrogen compound metabolic process	0.0006946	32/142 22.5%	LIN54 CELF2 ADAR PMF1 TAF5L MED12L PCM1 SNRPB2 IFT57 YARS ESRRA ZFHX3 XRCC5 RMI1 TAF13 USP22 TCF12 MTHFR RFX1 DYNLL1 SMARCA2 SREBF2 RCL1 CDK8 ZFP322A KLF6 HNRNPK GNAL AEBP2 TAF4B TAF2 SRSF9
protein localization	0.0010281	14/142 9.8%	IPO13 PEX16 NUP133 LRBA CAV1 CLTB DERL1 NUTF2 PCM1 RAB23 RAB35 STX2 SIL1 VTI1B
regulation of biological process	0.0010982	55/142 38.7%	LIN54 DIXDC1 ADAR NRGN RPTOR PCM1 PCLO NKIRAS2 ANXA7 SCD1 IFT57 FGFBP3 TNS1 TMOD3 TCF12 SIRT4 RFX1 DYNLL1 SREBF2 RGMA AEBP2 RAB35 MTAP2 CD47 PXK FIGF PXN KCNA4 PIK3R1 PMF1 TAF5L RTN4 MED12L OLFR624 MAP2 RAB23 SRGAP2 ESRRA ZFHX3 XRCC5 TAF13 LRBA CAV1 USP22 GATC DDIT4L SMARCA2 ARHGAP24 CDK8 ZFP322A KLF6 GNAL GKAP1 TAF4B TAF2
regulation of nucleobase, nucleoside, nucleotide and nucleic acid metabolic process	0.0013431	26/142 18.3%	LIN54 PXK ADAR PMF1 TAF5L MED12L PCM1 IFT57 ESRRA ZFHX3 TAF13 CAV1 USP22 TCF12 SIRT4 RFX1 DYNLL1 SMARCA2 SREBF2 CDK8 ZFP322A KLF6 GNAL AEBP2 TAF4B TAF2
anatomical structure development	0.0013431	27/142 19.0%	FIGF USP33 PXN DIXDC1 PIK3R1 RTN4 PCM1 MAP2 RAB23 DVL1 SDF4 STX2 METTL8 ESRRA ZFHX3 NUP133 XRCC5 TIPARP CSNK1A1 CAV1 MIAT SMARCA2 ARHGAP24 RGMA ACTA1 MTAP2 CCDC64
regulation of transcription	0.0014423	24/142 16.9%	ESRRA LIN54 ZFHX3 TAF13 CAV1 USP22 TCF12 SIRT4 ADAR RFX1 DYNLL1 PMF1 SMARCA2 TAF5L MED12L SREBF2 CDK8 ZFP322A PCM1 KLF6 AEBP2 TAF4B IFT57 TAF2
regulation of macromolecule metabolic process	0.0014423	28/142 19.7%	LIN54 ADAR PIK3R1 PMF1 TAF5L MED12L PCM1 RAB23 IFT57 ESRRA ZFHX3 TAF13 CAV1 USP22 TCF12 SIRT4 GATC RFX1 DYNLL1 SMARCA2 SREBF2 RGMA CDK8 ZFP322A KLF6 AEBP2 TAF4B TAF2
regulation of nitrogen compound metabolic process	0.0014423	26/142 18.3%	LIN54 PXK ADAR PMF1 TAF5L MED12L PCM1 IFT57 ESRRA ZFHX3 TAF13 CAV1 USP22 TCF12 SIRT4 RFX1 DYNLL1 SMARCA2 SREBF2 CDK8 ZFP322A KLF6 GNAL AEBP2 TAF4B TAF2
cellular biosynthetic process	0.0015809	29/142 20.4%	LIN54 RPLP0 ADAR PMF1 TAF5L MED12L PCM1 SCD1 IFT57 YARS ESRRA ZFHX3 RMI1 GALNT2 TAF13 ELOVL2 USP22 TCF12 MTHFR RFX1 DYNLL1 SMARCA2 SREBF2 CDK8 ZFP322A KLF6 AEBP2 TAF4B TAF2
establishment of localization in cell	0.0015809	12/142 8.4%	IPO13 PEX16 PCLO NUP133 LRBA DVL1 CLTB SDF4 CCDC64 NUTF2 STX2 VTI1B
regulation of cellular biosynthetic process	0.0015809	26/142 18.3%	LIN54 ADAR PMF1 TAF5L MED12L PCM1 IFT57 ESRRA ZFHX3 TAF13 CAV1 USP22 TCF12 SIRT4 GATC RFX1 DYNLL1 SMARCA2 SREBF2 CDK8 ZFP322A KLF6 GNAL AEBP2 TAF4B TAF2
system development	0.0016539	25/142 17.6%	FIGF USP33 DIXDC1 PIK3R1 RTN4 PCM1 MAP2 RAB23 DVL1 SDF4 STX2 METTL8 ESRRA ZFHX3 NUP133 XRCC5 TIPARP CAV1 MIAT SMARCA2 ARHGAP24 RGMA ACTA1 MTAP2 CCDC64
regulation of biosynthetic process	0.0017298	26/142 18.3%	LIN54 ADAR PMF1 TAF5L MED12L PCM1 IFT57 ESRRA ZFHX3 TAF13 CAV1 USP22 TCF12 SIRT4 GATC RFX1 DYNLL1 SMARCA2 SREBF2 CDK8 ZFP322A KLF6 GNAL AEBP2 TAF4B TAF2
regulation of macromolecule biosynthetic process	0.0017298	25/142 17.6%	LIN54 ADAR PMF1 TAF5L MED12L PCM1 IFT57 ESRRA ZFHX3 TAF13 CAV1 USP22 TCF12 SIRT4 GATC RFX1 DYNLL1 SMARCA2 SREBF2 CDK8 ZFP322A KLF6 AEBP2 TAF4B TAF2
positive regulation of peptidase activity	0.0021317	4/142 2.8%	CAV1 PSME2 IFT57 TNS1
biosynthetic process	0.0023873	29/142 20.4%	LIN54 RPLP0 ADAR PMF1 TAF5L MED12L PCM1 SCD1 IFT57 YARS ESRRA ZFHX3 RMI1 GALNT2 TAF13 ELOVL2 USP22 TCF12 MTHFR RFX1 DYNLL1 SMARCA2 SREBF2 CDK8 ZFP322A KLF6 AEBP2 TAF4B TAF2
regulation of gene expression	0.0025219	25/142 17.6%	LIN54 ADAR PMF1 TAF5L MED12L PCM1 IFT57 ESRRA ZFHX3 TAF13 CAV1 USP22 TCF12 SIRT4 GATC RFX1 DYNLL1 SMARCA2 SREBF2 CDK8 ZFP322A KLF6 AEBP2 TAF4B TAF2
developmental process	0.0035434	29/142 20.4%	FIGF USP33 PXN DIXDC1 PIK3R1 RTN4 PCM1 MAP2 RAB23 DVL1 SDF4 SCD1 STX2 METTL8 ESRRA ZFHX3 NUP133 XRCC5 TIPARP CSNK1A1 CAV1 TCF12 MIAT SMARCA2 ARHGAP24 RGMA ACTA1 MTAP2 CCDC64
cellular developmental process	0.0035434	21/142 14.7%	FIGF XRCC5 TIPARP CSNK1A1 CAV1 USP33 DIXDC1 PIK3R1 MIAT RTN4 ARHGAP24 ACTA1 PCM1 MAP2 DVL1 MTAP2 SDF4 CCDC64 SCD1 STX2 METTL8
macromolecule localization	0.0037791	14/142 9.8%	IPO13 PEX16 NUP133 LRBA CAV1 CLTB DERL1 NUTF2 PCM1 RAB23 RAB35 STX2 SIL1 VTI1B
macromolecule modification	0.0039303	17/142 11.9%	NEK9 PXK TIPARP GALNT2 CSNK1A1 USP22 PXN SIRT4 ADAR PIK3R1 CDK8 PCM1 MAP2 MTAP2 METTL8 STK40 CSNK1G1
organelle organization	0.0045168	15/142 10.5%	PEX16 CHGA NEK9 CSNK1A1 CAV1 USP22 PXN PMF1 SMARCA2 PCM1 PCLO AEBP2 MAP2 MTAP2 METTL8
microtubule-based process	0.0048386	6/142 4.2%	PCM1 MAP2 CAV1 MTAP2 DYNLL1 KIF27
regulation of microtubule polymerization or depolymerization	0.0049941	3/142 2.1%	MAP2 CAV1 MTAP2
intracellular transport	0.0051251	9/142 6.3%	IPO13 PEX16 NUP133 LRBA CLTB CCDC64 NUTF2 STX2 VTI1B
multicellular organismal development	0.0053635	27/142 19.0%	FIGF USP33 PXN DIXDC1 PIK3R1 RTN4 PCM1 MAP2 RAB23 DVL1 SDF4 STX2 METTL8 ESRRA ZFHX3 NUP133 XRCC5 TIPARP CAV1 TCF12 MIAT SMARCA2 ARHGAP24 RGMA ACTA1 MTAP2 CCDC64
cell differentiation	0.0059272	20/142 14.0%	FIGF XRCC5 TIPARP CAV1 USP33 DIXDC1 PIK3R1 MIAT RTN4 ARHGAP24 ACTA1 PCM1 MAP2 DVL1 MTAP2 SDF4 CCDC64 SCD1 STX2 METTL8
muscle organ development	0.006892	6/142 4.2%	ACTA1 ZFHX3 TIPARP CAV1 DVL1 METTL8
protein transport	0.008412	11/142 7.7%	IPO13 PEX16 NUP133 RAB23 RAB35 CLTB DERL1 NUTF2 STX2 SIL1 VTI1B
cellular component biogenesis	0.0085665	11/142 7.7%	RCL1 CAV1 CELF2 PXN DVL1 RPLP0 STX2 SMARCA2 ACADS PFKP TNS1
regulation of anti-apoptosis	0.0085665	3/142 2.1%	CAV1 PIK3R1 RTN4
establishment of protein localization	0.0085665	11/142 7.7%	IPO13 PEX16 NUP133 RAB23 RAB35 CLTB DERL1 NUTF2 STX2 SIL1 VTI1B
nervous system development	0.0087051	14/142 9.8%	XRCC5 USP33 DIXDC1 MIAT SMARCA2 RTN4 RGMA PCM1 MAP2 RAB23 DVL1 MTAP2 SDF4 CCDC64
transport	0.0087051	24/142 16.9%	IPO13 PEX16 NUP133 LRBA CAV1 DENND1A USP33 CLTB DERL1 ZDHHC13 KCNA4 NUTF2 DYNLL1 PCLO ABCB10 RAB23 RAB35 DVL1 SDF4 CCDC64 CD47 STX2 SIL1 VTI1B
skeletal muscle tissue development	0.009238	4/142 2.8%	ACTA1 CAV1 DVL1 METTL8
post-translational protein modification	0.009238	14/142 9.8%	NEK9 PXK TIPARP CSNK1A1 USP22 PXN SIRT4 PIK3R1 CDK8 MAP2 MTAP2 METTL8 STK40 CSNK1G1
establishment of localization	0.0092721	24/142 16.9%	IPO13 PEX16 NUP133 LRBA CAV1 DENND1A USP33 CLTB DERL1 ZDHHC13 KCNA4 NUTF2 DYNLL1 PCLO ABCB10 RAB23 RAB35 DVL1 SDF4 CCDC64 CD47 STX2 SIL1 VTI1B
skeletal muscle organ development	0.0095779	4/142 2.8%	ACTA1 CAV1 DVL1 METTL8
negative regulation of nitric oxide biosynthetic process	0.0095779	2/142 1.4%	CAV1 DYNLL1
localization	0.0095779	26/142 18.3%	IPO13 DENND1A USP33 CLTB DERL1 KCNA4 PCM1 PCLO RAB23 DVL1 SDF4 STX2 SIL1 TNS1 VTI1B PEX16 NUP133 LRBA CAV1 ZDHHC13 NUTF2 DYNLL1 ABCB10 RAB35 CCDC64 CD47
regulation of microtubule cytoskeleton organization	0.0097683	3/142 2.1%	MAP2 CAV1 MTAP2
cellular protein metabolic process	0.010177	19/142 13.3%	YARS NEK9 PXK TIPARP GALNT2 CSNK1A1 USP33 USP22 PXN RPLP0 SIRT4 PIK3R1 CDK8 HSPH1 MAP2 MTAP2 METTL8 STK40 CSNK1G1
negative regulation of protein complex disassembly	0.010367	3/142 2.1%	MAP2 TMOD3 MTAP2
organ development	0.010371	19/142 13.3%	ESRRA ZFHX3 FIGF NUP133 XRCC5 TIPARP CAV1 DIXDC1 PIK3R1 MIAT RTN4 ARHGAP24 RGMA ACTA1 PCM1 DVL1 SDF4 STX2 METTL8
cellular protein localization	0.011618	7/142 4.9%	IPO13 PEX16 PCM1 CLTB NUTF2 STX2 VTI1B
muscle tissue development	0.011627	5/142 3.5%	ACTA1 TIPARP CAV1 DVL1 METTL8
cellular macromolecule localization	0.011627	7/142 4.9%	IPO13 PEX16 PCM1 CLTB NUTF2 STX2 VTI1B
vesicle-mediated transport	0.011627	9/142 6.3%	PCLO LRBA CAV1 DENND1A USP33 CLTB SDF4 CD47 STX2
protein modification process	0.0131	15/142 10.5%	NEK9 PXK TIPARP GALNT2 CSNK1A1 USP22 PXN SIRT4 PIK3R1 CDK8 MAP2 MTAP2 METTL8 STK40 CSNK1G1
microtubule cytoskeleton organization	0.01422	4/142 2.8%	PCM1 MAP2 CAV1 MTAP2
muscle structure development	0.014241	6/142 4.2%	ACTA1 ZFHX3 TIPARP CAV1 DVL1 METTL8
response to steroid hormone stimulus	0.015067	4/142 2.8%	IDH1 CAV1 PIK3R1 ACAA1A
negative regulation of biological process	0.016332	18/142 12.6%	PXK ZFHX3 XRCC5 TMOD3 CAV1 SIRT4 DDIT4L ADAR PIK3R1 DYNLL1 SMARCA2 RTN4 PCM1 AEBP2 MAP2 RAB23 MTAP2 SCD1
regulation of microtubule-based process	0.016553	3/142 2.1%	MAP2 CAV1 MTAP2
protein amino acid phosphorylation	0.016553	10/142 7.0%	NEK9 CDK8 PXK MAP2 CSNK1A1 PXN MTAP2 PIK3R1 STK40 CSNK1G1
generation of neurons	0.018174	10/142 7.0%	PCM1 MAP2 XRCC5 USP33 DVL1 DIXDC1 MTAP2 CCDC64 MIAT RTN4
regulation of peptidase activity	0.018733	4/142 2.8%	CAV1 PSME2 IFT57 TNS1
response to salt stress	0.01889	2/142 1.4%	XRCC5 ANXA7
regulation of protein complex disassembly	0.019293	3/142 2.1%	MAP2 TMOD3 MTAP2
carbohydrate metabolic process	0.020089	8/142 5.6%	INPP5A GALNT2 IDH1 MLEC 5133401N09RIK PIK3R1 PGM2L1 PFKP
dendrite development	0.020089	3/142 2.1%	MAP2 DVL1 MTAP2
regulation of cellular component organization	0.021148	8/142 5.6%	MAP2 TMOD3 CAV1 DIXDC1 MTAP2 ANXA7 CD47 RTN4
intracellular signaling pathway	0.02118	12/142 8.4%	GNAL PCLO GKAP1 CAV1 NKIRAS2 RAB23 ASB8 RAB35 PXN DVL1 SREBF2 NRGN
phosphorylation	0.021617	11/142 7.7%	NEK9 CDK8 PXK MAP2 CSNK1A1 PXN MTAP2 PIK3R1 STK40 PFKP CSNK1G1
negative regulation of cytoskeleton organization	0.02172	3/142 2.1%	MAP2 TMOD3 MTAP2
cellular component assembly	0.02226	9/142 6.3%	CAV1 CELF2 PXN DVL1 STX2 SMARCA2 ACADS PFKP TNS1
response to endogenous stimulus	0.023372	6/142 4.2%	GNAL IDH1 CAV1 PIK3R1 ACAA1A SREBF2
neurogenesis	0.024881	10/142 7.0%	PCM1 MAP2 XRCC5 USP33 DVL1 DIXDC1 MTAP2 CCDC64 MIAT RTN4
negative regulation of cellular process	0.024881	16/142 11.2%	ZFHX3 XRCC5 TMOD3 CAV1 SIRT4 DDIT4L ADAR PIK3R1 DYNLL1 SMARCA2 RTN4 PCM1 AEBP2 MAP2 RAB23 MTAP2
intracellular protein transport	0.024881	6/142 4.2%	IPO13 PEX16 CLTB NUTF2 STX2 VTI1B
regulation of cytoskeleton organization	0.025407	4/142 2.8%	MAP2 TMOD3 CAV1 MTAP2
regulation of microtubule depolymerization	0.025686	2/142 1.4%	MAP2 MTAP2
negative regulation of microtubule depolymerization	0.025686	2/142 1.4%	MAP2 MTAP2
microtubule bundle formation	0.025686	2/142 1.4%	MAP2 MTAP2
positive regulation of hydrolase activity	0.028696	4/142 2.8%	CAV1 PSME2 IFT57 TNS1
negative regulation of cellular component organization	0.030261	4/142 2.8%	MAP2 TMOD3 MTAP2 RTN4
small molecule metabolic process	0.031336	15/142 10.5%	YARS IDH1 CAV1 ELOVL2 MTHFR PIK3R1 ACAA1A SREBF2 PGM2L1 PCM1 INPP5A GNAL SCD1 ACADS PFKP
tissue development	0.031336	10/142 7.0%	ESRRA ACTA1 NUP133 TIPARP CAV1 DVL1 STX2 METTL8 RTN4 RGMA
cell-substrate junction assembly	0.031336	2/142 1.4%	PXN TNS1
phosphorus metabolic process	0.031336	12/142 8.4%	NEK9 CDK8 PXK INPP5A MAP2 CSNK1A1 PXN MTAP2 PIK3R1 STK40 PFKP CSNK1G1
phosphate metabolic process	0.031336	12/142 8.4%	NEK9 CDK8 PXK INPP5A MAP2 CSNK1A1 PXN MTAP2 PIK3R1 STK40 PFKP CSNK1G1
cell projection organization	0.031438	7/142 4.9%	MAP2 USP33 PXN DVL1 MTAP2 CCDC64 STX2
positive regulation of cellular process	0.031725	17/142 11.9%	ESRRA FIGF XRCC5 CAV1 TCF12 DIXDC1 PIK3R1 PMF1 RTN4 SREBF2 RGMA RPTOR KLF6 SCD1 CD47 FGFBP3 TNS1
negative regulation of microtubule polymerization or depolymerization	0.034363	2/142 1.4%	MAP2 MTAP2
membrane organization	0.035607	6/142 4.2%	CAV1 DENND1A USP33 ANXA7 CD47 STX2
cellular membrane organization	0.035607	6/142 4.2%	CAV1 DENND1A USP33 ANXA7 CD47 STX2
intracellular signal transduction	0.035607	9/142 6.3%	GNAL PCLO GKAP1 CAV1 NKIRAS2 RAB23 RAB35 PXN NRGN
cytoskeleton organization	0.035607	6/142 4.2%	PCM1 PCLO MAP2 CAV1 PXN MTAP2
negative regulation of proteolysis	0.035607	2/142 1.4%	RAB23 PIK3R1
peptidyl-threonine phosphorylation	0.035607	2/142 1.4%	MAP2 MTAP2
peptidyl-threonine modification	0.035607	2/142 1.4%	MAP2 MTAP2
monocarboxylic acid metabolic process	0.035607	6/142 4.2%	IDH1 ELOVL2 MTHFR SCD1 ACAA1A ACADS
RNA metabolic process	0.035607	9/142 6.3%	YARS RCL1 HNRNPK TAF13 CELF2 TAF4B ADAR SNRPB2 SRSF9
fat cell differentiation	0.037135	3/142 2.1%	SDF4 SCD1 METTL8
negative regulation of organelle organization	0.037135	3/142 2.1%	MAP2 TMOD3 MTAP2
striated muscle tissue development	0.038852	4/142 2.8%	ACTA1 CAV1 DVL1 METTL8
protein metabolic process	0.038852	20/142 14.0%	YARS NEK9 PXK TIPARP GALNT2 CSNK1A1 USP33 USP22 PXN RPLP0 SIRT4 PIK3R1 CDK8 HSPH1 MAP2 MTAP2 METTL8 STK40 TNS1 CSNK1G1
response to calcium ion	0.041554	2/142 1.4%	CAV1 ANXA7
regulation of endothelial cell proliferation	0.041554	2/142 1.4%	RPTOR CAV1
blood vessel morphogenesis	0.042584	5/142 3.5%	FIGF TIPARP CAV1 RTN4 ARHGAP24
lipid modification	0.042584	3/142 2.1%	PIK3R1 SCD1 ACADS
negative regulation of ATPase activity	0.042584	1/142 0.7%	PXK
regulation of translational fidelity	0.042584	1/142 0.7%	GATC
pointed-end actin filament capping	0.042584	1/142 0.7%	TMOD3
cytokinetic cell separation	0.042584	1/142 0.7%	STX2
zymogen granule exocytosis	0.042584	1/142 0.7%	SDF4
butyrate metabolic process	0.042584	1/142 0.7%	ACADS
short-chain fatty acid catabolic process	0.042584	1/142 0.7%	ACADS
butyrate catabolic process	0.042584	1/142 0.7%	ACADS
steroid esterification	0.042584	1/142 0.7%	SCD1
sterol esterification	0.042584	1/142 0.7%	SCD1
cholesterol esterification	0.042584	1/142 0.7%	SCD1
Golgi to secretory granule transport	0.042584	1/142 0.7%	CCDC64
positive regulation of catalytic activity	0.043065	6/142 4.2%	GNAL CAV1 PXN PSME2 IFT57 TNS1
positive regulation of anti-apoptosis	0.044215	2/142 1.4%	CAV1 PIK3R1
Wnt receptor signaling pathway	0.044215	4/142 2.8%	CSNK1A1 DVL1 DIXDC1 CSNK1G1
response to hormone stimulus	0.045738	5/142 3.5%	IDH1 CAV1 PIK3R1 ACAA1A SREBF2
cellular carbohydrate metabolic process	0.046382	6/142 4.2%	INPP5A GALNT2 IDH1 PIK3R1 PGM2L1 PFKP
anatomical structure morphogenesis	0.047122	13/142 9.1%	FIGF TIPARP CSNK1A1 CAV1 USP33 PXN MIAT RTN4 ARHGAP24 RGMA RAB23 DVL1 STX2
response to organic substance	0.047906	9/142 6.3%	GNAL IDH1 CAV1 DERL1 SDF4 ANXA7 PIK3R1 ACAA1A SREBF2
protein import	0.049248	3/142 2.1%	IPO13 PEX16 NUTF2
calcium ion-dependent exocytosis	0.049248	2/142 1.4%	SDF4 STX2
response to osmotic stress	0.049248	2/142 1.4%	XRCC5 ANXA7
maintenance of protein location in cell	0.049248	2/142 1.4%	PCM1 CAV1

## Sheet: PFC_Myt1l_H3K4me3_Up
Go description	Corrected p-value	Counts	Genes
cellular process	6.1653e-12	94/153 61.4%	ERRFI1 GALNT13 CSRNP3 LRRK2 HSCB NUB1 HINT2 EEF2K GNPTAB RPL18A GM2A NOB1 SIX5 IMPA2 PHGDH HMGCS2 SLC12A6 ACP1 SPTAN1 SCN1A TMEM14C NCOA2 EMX1 RALBP1 SUN1 CXADR CAMK1D TSC22D1 NRG1 TICAM1 MRPL45 TERF1 TFDP2 AEBP2 DAD1 PEX3 RARB PKP4 NAA38 KIF2C SEC22B SGK1 NOTCH2 LIPT2 CDS1 SLC24A2 DLX1 DLX2 ACAA1A PPOX LIN7B NT5C3 UNG PPP2CA SNX1 TCOF1 ASNA1 EP400 WASF2 EIF4E VTI1B MAP2K6 RUNX1T1 GINS1 TRAP1 TRA…
cellular metabolic process	1.1226e-06	60/153 39.2%	GALNT13 CSRNP3 LRRK2 HSCB NUB1 EEF2K GNPTAB RPL18A GM2A NOB1 SIX5 IMPA2 PHGDH HMGCS2 ACP1 TMEM14C NCOA2 CAMK1D TSC22D1 NRG1 TERF1 TFDP2 AEBP2 RARB NAA38 SGK1 NOTCH2 LIPT2 CDS1 ACAA1A PPOX NT5C3 UNG PPP2CA TCOF1 EIF4E MAP2K6 RUNX1T1 GINS1 TRAP1 CREBBP CDK19 ZRANB2 MDH1 EGF SMARCA5 GGH FANCC ZFHX4 PTK2 CYP51 DHODH WEE1 PER3 EIF3K ASXL3 MPHOSPH10 TAF4B TCF4 GALM
primary metabolic process	3.5178e-06	60/153 39.2%	GALNT13 CSRNP3 LRRK2 HSCB NUB1 HINT2 EEF2K GNPTAB RPL18A GM2A NOB1 SIX5 IMPA2 PHGDH HMGCS2 ACP1 NCOA2 CAMK1D TSC22D1 TERF1 TFDP2 AEBP2 RARB NAA38 SGK1 NOTCH2 LIPT2 CDS1 ASAH1 ACAA1A NT5C3 UNG PPP2CA TCOF1 EIF4E MAP2K6 RUNX1T1 GINS1 TRAP1 CREBBP CDK19 ZRANB2 MDH1 EGF SMARCA5 GGH FANCC ZFHX4 PTK2 CYP51 DHODH WEE1 PER3 EIF3K ASXL3 MPHOSPH10 TAF4B TCF4 GALM OSBPL1A
negative regulation of cellular process	1.1891e-05	26/153 16.9%	SLC24A2 ERRFI1 DLX1 DLX2 PPOX UNG SIX5 SPTAN1 RUNX1T1 MAGI1 NCOA2 LINGO1 RALBP1 CREBBP CXADR SMARCA5 NRG1 PTK2 TFAP4 PER3 AEBP2 DAD1 RARB TCF4 RGS11 SGK1
metabolic process	1.318e-05	64/153 41.8%	GALNT13 CSRNP3 LRRK2 NAT10 HSCB NUB1 HINT2 EEF2K GNPTAB RPL18A GM2A NOB1 SIX5 IMPA2 PHGDH HMGCS2 ACP1 TMEM14C NCOA2 CAMK1D TSC22D1 NRG1 TERF1 TFDP2 AEBP2 RARB NAA38 SGK1 NOTCH2 LIPT2 CDS1 ASAH1 ACAA1A PPOX NT5C3 UNG PPP2CA TCOF1 EIF4E MAP2K6 RUNX1T1 GINS1 TRAP1 CREBBP CDK19 ZRANB2 MDH1 EGF SMARCA5 GGH FANCC ZFHX4 PTK2 CYP51 DHODH WEE1 PER3 EIF3K ASXL3 MPHOSPH10 TAF4B TCF4 GALM OSBPL1A
cellular macromolecule metabolic process	1.4552e-05	46/153 30.0%	NOTCH2 LIPT2 CDS1 GALNT13 CSRNP3 LRRK2 HSCB UNG PPP2CA NUB1 EEF2K RPL18A NOB1 TCOF1 SIX5 ACP1 EIF4E MAP2K6 RUNX1T1 GINS1 TRAP1 NCOA2 CREBBP CDK19 ZRANB2 CAMK1D TSC22D1 EGF SMARCA5 FANCC NRG1 TERF1 ZFHX4 PTK2 WEE1 PER3 TFDP2 AEBP2 EIF3K ASXL3 MPHOSPH10 TAF4B RARB TCF4 NAA38 SGK1
negative regulation of biological process	1.9216e-05	27/153 17.6%	SLC24A2 ERRFI1 DLX1 DLX2 PPOX UNG SIX5 SPTAN1 RUNX1T1 MAGI1 NCOA2 LINGO1 RALBP1 CREBBP CXADR SMARCA5 NRG1 PTK2 TFAP4 PER3 AGO3 AEBP2 DAD1 RARB TCF4 RGS11 SGK1
regulation of macromolecule metabolic process	4.6702e-05	34/153 22.2%	NOTCH2 ERRFI1 DLX1 DLX2 CSRNP3 NUFIP1 PPOX ELK4 SIX5 MLST8 PHGDH EIF4E RUNX1T1 MAGI1 NCOA2 EMX1 CREBBP TSC22D1 EGF SMARCA5 NRG1 TICAM1 TERF1 ZFHX4 TFAP4 PER3 AGO3 TFDP2 AEBP2 EIF3K ASXL3 TAF4B RARB TCF4
regulation of cellular metabolic process	8.9998e-05	35/153 22.8%	NOTCH2 ERRFI1 DLX1 DLX2 CSRNP3 NUFIP1 PPOX ELK4 SIX5 MLST8 EIF4E MAP2K6 RUNX1T1 MAGI1 NCOA2 EMX1 RALBP1 CREBBP TSC22D1 EGF SMARCA5 NRG1 TICAM1 TERF1 ZFHX4 TFAP4 PER3 AGO3 TFDP2 AEBP2 EIF3K ASXL3 TAF4B RARB TCF4
regulation of primary metabolic process	8.9998e-05	34/153 22.2%	NOTCH2 ERRFI1 DLX1 DLX2 CSRNP3 NUFIP1 PPOX ELK4 SIX5 MLST8 EIF4E RUNX1T1 MAGI1 NCOA2 EMX1 RALBP1 CREBBP TSC22D1 EGF SMARCA5 NRG1 TICAM1 TERF1 ZFHX4 TFAP4 PER3 AGO3 TFDP2 AEBP2 EIF3K ASXL3 TAF4B RARB TCF4
negative regulation of macromolecule metabolic process	0.0001012	15/153 9.8%	MAGI1 ERRFI1 DLX1 NCOA2 DLX2 SMARCA5 NRG1 PPOX TFAP4 PER3 AGO3 AEBP2 RARB TCF4 RUNX1T1
regulation of metabolic process	0.00011837	36/153 23.5%	NOTCH2 ERRFI1 DLX1 DLX2 CSRNP3 NUFIP1 PPOX ELK4 SIX5 MLST8 PHGDH EIF4E MAP2K6 RUNX1T1 MAGI1 NCOA2 EMX1 RALBP1 CREBBP TSC22D1 EGF SMARCA5 NRG1 TICAM1 TERF1 ZFHX4 TFAP4 PER3 AGO3 TFDP2 AEBP2 EIF3K ASXL3 TAF4B RARB TCF4
macromolecule metabolic process	0.00020615	46/153 30.0%	NOTCH2 LIPT2 CDS1 GALNT13 CSRNP3 LRRK2 HSCB UNG PPP2CA NUB1 EEF2K RPL18A NOB1 TCOF1 SIX5 ACP1 EIF4E MAP2K6 RUNX1T1 GINS1 TRAP1 NCOA2 CREBBP CDK19 ZRANB2 CAMK1D TSC22D1 EGF SMARCA5 FANCC NRG1 TERF1 ZFHX4 PTK2 WEE1 PER3 TFDP2 AEBP2 EIF3K ASXL3 MPHOSPH10 TAF4B RARB TCF4 NAA38 SGK1
negative regulation of metabolic process	0.00020615	15/153 9.8%	MAGI1 ERRFI1 DLX1 NCOA2 DLX2 SMARCA5 NRG1 PPOX TFAP4 PER3 AGO3 AEBP2 RARB TCF4 RUNX1T1
negative regulation of oligodendrocyte differentiation	0.00022337	3/153 1.9%	DLX1 LINGO1 DLX2
regulation of macromolecule biosynthetic process	0.00022337	29/153 18.9%	NOTCH2 DLX1 DLX2 CSRNP3 NUFIP1 PPOX ELK4 SIX5 EIF4E RUNX1T1 NCOA2 EMX1 CREBBP TSC22D1 SMARCA5 NRG1 TICAM1 TERF1 ZFHX4 TFAP4 PER3 AGO3 TFDP2 AEBP2 EIF3K ASXL3 TAF4B RARB TCF4
negative regulation of cellular metabolic process	0.00022337	14/153 9.1%	MAGI1 ERRFI1 DLX1 NCOA2 DLX2 SMARCA5 NRG1 PPOX TFAP4 PER3 AEBP2 RARB TCF4 RUNX1T1
biological regulation	0.00031501	63/153 41.1%	ERRFI1 CSRNP3 LRRK2 ELK4 RASSF3 GM2A SIX5 MLST8 PHGDH EVI5L SPTAN1 SCN1A MAGI1 NCOA2 EMX1 RALBP1 CXADR CAMK1D TSC22D1 NRG1 TICAM1 TERF1 TFDP2 AEBP2 DAD1 ANGPTL2 RARB SGK1 NOTCH2 CDS1 SLC24A2 DLX1 DLX2 NUFIP1 PPOX LIN7B UNG RAP1B PPP2CA ASNA1 WASF2 EIF4E MAP2K6 RUNX1T1 LINGO1 CREBBP SNAPIN EGF SMARCA5 FANCC ZFHX4 PTK2 DHODH TFAP4 PER3 ARMC10 AGO3 EIF3K ASXL3 TAF4B TCF4 RGS11 RHEBL1
regulation of gene expression	0.00033652	29/153 18.9%	NOTCH2 DLX1 DLX2 CSRNP3 NUFIP1 ELK4 SIX5 PHGDH EIF4E RUNX1T1 NCOA2 EMX1 CREBBP TSC22D1 SMARCA5 NRG1 TICAM1 TERF1 ZFHX4 TFAP4 PER3 AGO3 TFDP2 AEBP2 EIF3K ASXL3 TAF4B RARB TCF4
negative regulation of nucleobase, nucleoside, nucleotide and nucleic acid metabolic process	0.00037887	12/153 7.8%	DLX1 NCOA2 DLX2 TFAP4 PER3 AEBP2 SMARCA5 RARB TCF4 NRG1 PPOX RUNX1T1
negative regulation of nitrogen compound metabolic process	0.00043908	12/153 7.8%	DLX1 NCOA2 DLX2 TFAP4 PER3 AEBP2 SMARCA5 RARB TCF4 NRG1 PPOX RUNX1T1
regulation of cellular biosynthetic process	0.00044173	29/153 18.9%	NOTCH2 DLX1 DLX2 CSRNP3 NUFIP1 PPOX ELK4 SIX5 EIF4E RUNX1T1 NCOA2 EMX1 CREBBP TSC22D1 SMARCA5 NRG1 TICAM1 TERF1 ZFHX4 TFAP4 PER3 AGO3 TFDP2 AEBP2 EIF3K ASXL3 TAF4B RARB TCF4
regulation of biosynthetic process	0.00050758	29/153 18.9%	NOTCH2 DLX1 DLX2 CSRNP3 NUFIP1 PPOX ELK4 SIX5 EIF4E RUNX1T1 NCOA2 EMX1 CREBBP TSC22D1 SMARCA5 NRG1 TICAM1 TERF1 ZFHX4 TFAP4 PER3 AGO3 TFDP2 AEBP2 EIF3K ASXL3 TAF4B RARB TCF4
negative regulation of macromolecule biosynthetic process	0.00051668	12/153 7.8%	DLX1 NCOA2 DLX2 TFAP4 PER3 AEBP2 SMARCA5 RARB TCF4 NRG1 PPOX RUNX1T1
negative regulation of gene expression	0.00051701	12/153 7.8%	DLX1 NCOA2 DLX2 TFAP4 PER3 AGO3 AEBP2 SMARCA5 RARB TCF4 NRG1 RUNX1T1
negative regulation of cellular biosynthetic process	0.00062212	12/153 7.8%	DLX1 NCOA2 DLX2 TFAP4 PER3 AEBP2 SMARCA5 RARB TCF4 NRG1 PPOX RUNX1T1
regulation of nucleobase, nucleoside, nucleotide and nucleic acid metabolic process	0.00065652	28/153 18.3%	NOTCH2 DLX1 DLX2 CSRNP3 NUFIP1 PPOX ELK4 SIX5 MLST8 RUNX1T1 NCOA2 EMX1 RALBP1 CREBBP TSC22D1 SMARCA5 NRG1 TICAM1 TERF1 ZFHX4 TFAP4 PER3 TFDP2 AEBP2 ASXL3 TAF4B RARB TCF4
negative regulation of biosynthetic process	0.00066418	12/153 7.8%	DLX1 NCOA2 DLX2 TFAP4 PER3 AEBP2 SMARCA5 RARB TCF4 NRG1 PPOX RUNX1T1
regulation of nitrogen compound metabolic process	0.00071985	28/153 18.3%	NOTCH2 DLX1 DLX2 CSRNP3 NUFIP1 PPOX ELK4 SIX5 MLST8 RUNX1T1 NCOA2 EMX1 RALBP1 CREBBP TSC22D1 SMARCA5 NRG1 TICAM1 TERF1 ZFHX4 TFAP4 PER3 TFDP2 AEBP2 ASXL3 TAF4B RARB TCF4
negative regulation of transcription	0.00071985	11/153 7.1%	DLX1 NCOA2 DLX2 TFAP4 PER3 AEBP2 SMARCA5 RARB TCF4 NRG1 RUNX1T1
regulation of transcription, DNA-dependent	0.00071985	19/153 12.4%	DLX1 NCOA2 EMX1 DLX2 CREBBP CSRNP3 NUFIP1 TSC22D1 SMARCA5 ZFHX4 ELK4 TFAP4 PER3 TFDP2 AEBP2 SIX5 RARB TCF4 RUNX1T1
biosynthetic process	0.00075266	32/153 20.9%	NOTCH2 LIPT2 CDS1 GALNT13 CSRNP3 PPOX NUB1 HINT2 RPL18A TCOF1 SIX5 PHGDH HMGCS2 EIF4E TMEM14C RUNX1T1 GINS1 NCOA2 CREBBP TSC22D1 TERF1 ZFHX4 CYP51 DHODH PER3 TFDP2 AEBP2 EIF3K ASXL3 TAF4B RARB TCF4
regulation of RNA metabolic process	0.00085	19/153 12.4%	DLX1 NCOA2 EMX1 DLX2 CREBBP CSRNP3 NUFIP1 TSC22D1 SMARCA5 ZFHX4 ELK4 TFAP4 PER3 TFDP2 AEBP2 SIX5 RARB TCF4 RUNX1T1
cellular nitrogen compound metabolic process	0.00088139	33/153 21.5%	NOTCH2 CSRNP3 PPOX NT5C3 UNG NUB1 NOB1 TCOF1 SIX5 PHGDH TMEM14C RUNX1T1 GINS1 NCOA2 CREBBP ZRANB2 TSC22D1 MDH1 SMARCA5 GGH FANCC TERF1 ZFHX4 DHODH PER3 TFDP2 AEBP2 ASXL3 MPHOSPH10 TAF4B RARB TCF4 NAA38
regulation of transcription from RNA polymerase II promoter involved in forebrain neuron fate commitment	0.00092391	2/153 1.3%	DLX1 DLX2
cerebral cortex GABAergic interneuron fate commitment	0.00092391	2/153 1.3%	DLX1 DLX2
commitment of multipotent stem cells to the neuronal lineage in the forebrain	0.00092391	2/153 1.3%	DLX1 DLX2
regulation of apoptosis	0.0012252	13/153 8.4%	NOTCH2 DLX1 CSRNP3 CAMK1D TICAM1 PTK2 UNG DHODH TFAP4 DAD1 RARB SGK1 MAP2K6
negative regulation of glial cell differentiation	0.0012577	3/153 1.9%	DLX1 LINGO1 DLX2
regulation of transcription	0.0012785	25/153 16.3%	NOTCH2 DLX1 DLX2 CSRNP3 NUFIP1 ELK4 SIX5 RUNX1T1 NCOA2 EMX1 CREBBP TSC22D1 SMARCA5 NRG1 TICAM1 TERF1 ZFHX4 TFAP4 PER3 TFDP2 AEBP2 ASXL3 TAF4B RARB TCF4
nitrogen compound metabolic process	0.0012785	33/153 21.5%	NOTCH2 CSRNP3 PPOX NT5C3 UNG NUB1 NOB1 TCOF1 SIX5 PHGDH TMEM14C RUNX1T1 GINS1 NCOA2 CREBBP ZRANB2 TSC22D1 MDH1 SMARCA5 GGH FANCC TERF1 ZFHX4 DHODH PER3 TFDP2 AEBP2 ASXL3 MPHOSPH10 TAF4B RARB TCF4 NAA38
regulation of programmed cell death	0.0012785	13/153 8.4%	NOTCH2 DLX1 CSRNP3 CAMK1D TICAM1 PTK2 UNG DHODH TFAP4 DAD1 RARB SGK1 MAP2K6
regulation of gliogenesis	0.0013789	4/153 2.6%	DLX1 LINGO1 DLX2 PTK2
regulation of oligodendrocyte differentiation	0.0014133	3/153 1.9%	DLX1 LINGO1 DLX2
regulation of cell death	0.0014597	13/153 8.4%	NOTCH2 DLX1 CSRNP3 CAMK1D TICAM1 PTK2 UNG DHODH TFAP4 DAD1 RARB SGK1 MAP2K6
regulation of cellular process	0.0015062	55/153 35.9%	ERRFI1 CSRNP3 LRRK2 ELK4 RASSF3 SIX5 MLST8 SPTAN1 SCN1A MAGI1 NCOA2 EMX1 RALBP1 CXADR CAMK1D TSC22D1 NRG1 TICAM1 TERF1 TFDP2 AEBP2 DAD1 ANGPTL2 RARB SGK1 NOTCH2 CDS1 SLC24A2 DLX1 DLX2 NUFIP1 PPOX UNG RAP1B PPP2CA WASF2 EIF4E MAP2K6 RUNX1T1 LINGO1 CREBBP EGF SMARCA5 ZFHX4 PTK2 DHODH TFAP4 PER3 AGO3 EIF3K ASXL3 TAF4B TCF4 RGS11 RHEBL1
regulation of biological process	0.0015062	57/153 37.2%	ERRFI1 CSRNP3 LRRK2 ELK4 RASSF3 SIX5 MLST8 PHGDH SPTAN1 SCN1A MAGI1 NCOA2 EMX1 RALBP1 CXADR CAMK1D TSC22D1 NRG1 TICAM1 TERF1 TFDP2 AEBP2 DAD1 ANGPTL2 RARB SGK1 NOTCH2 CDS1 SLC24A2 DLX1 DLX2 NUFIP1 PPOX UNG RAP1B PPP2CA WASF2 EIF4E MAP2K6 RUNX1T1 LINGO1 CREBBP EGF SMARCA5 ZFHX4 PTK2 DHODH TFAP4 PER3 ARMC10 AGO3 EIF3K ASXL3 TAF4B TCF4 RGS11 RHEBL1
cellular biosynthetic process	0.0017279	30/153 19.6%	NOTCH2 LIPT2 CDS1 GALNT13 CSRNP3 PPOX NUB1 RPL18A TCOF1 SIX5 PHGDH HMGCS2 EIF4E TMEM14C RUNX1T1 GINS1 NCOA2 CREBBP TSC22D1 TERF1 ZFHX4 DHODH PER3 TFDP2 AEBP2 EIF3K ASXL3 TAF4B RARB TCF4
regulation of developmental process	0.0018779	14/153 9.1%	NOTCH2 ERRFI1 DLX1 LINGO1 DLX2 CREBBP CXADR EGF NRG1 PTK2 DHODH RARB TCF4 SGK1
developmental process	0.0019893	31/153 20.2%	NOTCH2 ERRFI1 DLX1 DLX2 ASAH1 PITPNB UNG PPP2CA GNPTAB SIX5 PHGDH WASF2 SCN1A RUNX1T1 GINS1 EMX1 LINGO1 CREBBP CXADR SORT1 EGF SMARCA5 FANCC NRG1 PTK2 DAD1 SLCO4C1 RARB TCF4 CNTN4 SGK1
negative regulation of developmental process	0.0025295	8/153 5.2%	DLX1 LINGO1 DLX2 CREBBP CXADR RARB TCF4 PTK2
intracellular signal transduction	0.0025403	12/153 7.8%	RAP1B ERRFI1 LINGO1 RALBP1 EGF LRRK2 NRG1 PPOX RHEBL1 WASF2 PTK2 MAP2K6
negative regulation of gliogenesis	0.0025683	3/153 1.9%	DLX1 LINGO1 DLX2
organelle organization	0.0025683	16/153 10.4%	RALBP1 CREBBP SUN1 CXADR SORT1 SMARCA5 TERF1 PTK2 WEE1 AEBP2 PEX3 EP400 KIF2C SGK1 SPTAN1 WASF2
phosphorus metabolic process	0.0038707	15/153 9.8%	CDS1 CDK19 CAMK1D EGF LRRK2 NT5C3 PTK2 PPP2CA WEE1 EEF2K GNPTAB IMPA2 SGK1 ACP1 MAP2K6
phosphate metabolic process	0.0038707	15/153 9.8%	CDS1 CDK19 CAMK1D EGF LRRK2 NT5C3 PTK2 PPP2CA WEE1 EEF2K GNPTAB IMPA2 SGK1 ACP1 MAP2K6
negative regulation of cell differentiation	0.0041107	7/153 4.5%	DLX1 LINGO1 DLX2 CREBBP RARB TCF4 PTK2
nucleobase, nucleoside, nucleotide and nucleic acid metabolic process	0.0041107	29/153 18.9%	NOTCH2 CSRNP3 NT5C3 UNG NUB1 NOB1 TCOF1 SIX5 RUNX1T1 GINS1 NCOA2 CREBBP ZRANB2 TSC22D1 MDH1 SMARCA5 FANCC TERF1 ZFHX4 DHODH PER3 TFDP2 AEBP2 ASXL3 MPHOSPH10 TAF4B RARB TCF4 NAA38
nucleic acid metabolic process	0.004229	26/153 16.9%	NOTCH2 CSRNP3 UNG NUB1 NOB1 TCOF1 SIX5 RUNX1T1 GINS1 NCOA2 CREBBP ZRANB2 TSC22D1 SMARCA5 FANCC TERF1 ZFHX4 PER3 TFDP2 AEBP2 ASXL3 MPHOSPH10 TAF4B RARB TCF4 NAA38
regulation of molecular function	0.0046329	14/153 9.1%	ERRFI1 NCOA2 RALBP1 CREBBP EGF NRG1 TICAM1 PPOX GM2A MLST8 EVI5L RGS11 MAP2K6 RUNX1T1
negative regulation of neurogenesis	0.0051472	4/153 2.6%	DLX1 LINGO1 DLX2 PTK2
forebrain neuron fate commitment	0.0054564	2/153 1.3%	DLX1 DLX2
intracellular signaling pathway	0.0056158	14/153 9.1%	CDS1 ERRFI1 LINGO1 RALBP1 EGF LRRK2 NRG1 PPOX PTK2 RAP1B RGS11 RHEBL1 WASF2 MAP2K6
negative regulation of cell development	0.0063457	4/153 2.6%	DLX1 LINGO1 DLX2 PTK2
establishment of localization in cell	0.0069014	11/153 7.1%	TRAPPC3 SNX1 SNAPIN GNPTAB MRPL45 SEC22B LIN7B WASF2 PTK2 COPE VTI1B
positive regulation of cellular process	0.0076972	20/153 13.0%	NOTCH2 SLC24A2 NCOA2 DLX2 CREBBP CSRNP3 NUFIP1 EGF SMARCA5 NRG1 TICAM1 PPOX PTK2 DHODH MLST8 RARB TCF4 SGK1 EIF4E MAP2K6
negative regulation of transcription, DNA-dependent	0.0086616	8/153 5.2%	DLX1 NCOA2 DLX2 TFAP4 PER3 SMARCA5 RARB TCF4
regulation of glial cell differentiation	0.0086616	3/153 1.9%	DLX1 LINGO1 DLX2
negative regulation of RNA metabolic process	0.0089268	8/153 5.2%	DLX1 NCOA2 DLX2 TFAP4 PER3 SMARCA5 RARB TCF4
cellular protein metabolic process	0.0093384	20/153 13.0%	LIPT2 CDS1 TRAP1 CREBBP CDK19 GALNT13 CAMK1D EGF LRRK2 HSCB PTK2 PPP2CA WEE1 EEF2K RPL18A EIF3K SGK1 ACP1 EIF4E MAP2K6
cerebral cortex GABAergic interneuron differentiation	0.0099366	2/153 1.3%	DLX1 DLX2
cell differentiation	0.010877	20/153 13.0%	NOTCH2 DLX1 EMX1 LINGO1 DLX2 CREBBP CXADR SORT1 FANCC NRG1 PTK2 GNPTAB SIX5 SLCO4C1 RARB TCF4 PHGDH CNTN4 SGK1 RUNX1T1
anatomical structure development	0.010877	25/153 16.3%	NOTCH2 ERRFI1 DLX1 DLX2 ASAH1 UNG PPP2CA SIX5 PHGDH WASF2 GINS1 EMX1 LINGO1 CREBBP CXADR SORT1 EGF FANCC NRG1 PTK2 DAD1 RARB TCF4 CNTN4 SGK1
cellular macromolecule biosynthetic process	0.011008	23/153 15.0%	NOTCH2 GINS1 NCOA2 CREBBP GALNT13 CSRNP3 TSC22D1 TERF1 ZFHX4 NUB1 PER3 RPL18A TFDP2 AEBP2 TCOF1 EIF3K SIX5 ASXL3 TAF4B RARB TCF4 EIF4E RUNX1T1
regulation of cellular protein metabolic process	0.011008	8/153 5.2%	MAGI1 ERRFI1 AGO3 EIF3K EGF MLST8 TICAM1 EIF4E
regulation of cell differentiation	0.011008	10/153 6.5%	ERRFI1 DLX1 LINGO1 DLX2 CREBBP RARB TCF4 NRG1 SGK1 PTK2
macromolecule biosynthetic process	0.011411	23/153 15.0%	NOTCH2 GINS1 NCOA2 CREBBP GALNT13 CSRNP3 TSC22D1 TERF1 ZFHX4 NUB1 PER3 RPL18A TFDP2 AEBP2 TCOF1 EIF3K SIX5 ASXL3 TAF4B RARB TCF4 EIF4E RUNX1T1
multicellular organismal development	0.011411	27/153 17.6%	NOTCH2 ERRFI1 DLX1 DLX2 ASAH1 PITPNB UNG PPP2CA SIX5 PHGDH WASF2 SCN1A GINS1 EMX1 LINGO1 CXADR SORT1 EGF SMARCA5 NRG1 PTK2 DAD1 SLCO4C1 RARB TCF4 CNTN4 SGK1
positive regulation of biological process	0.012027	21/153 13.7%	MAGI1 NOTCH2 SLC24A2 NCOA2 DLX2 CREBBP CSRNP3 NUFIP1 EGF SMARCA5 NRG1 TICAM1 PPOX PTK2 DHODH MLST8 RARB TCF4 SGK1 EIF4E MAP2K6
cellular localization	0.012027	11/153 7.1%	TRAPPC3 SNX1 SNAPIN GNPTAB MRPL45 SEC22B LIN7B WASF2 PTK2 COPE VTI1B
neuron differentiation	0.012066	9/153 5.8%	DLX1 EMX1 LINGO1 DLX2 PHGDH NRG1 CNTN4 SGK1 PTK2
regulation of cell communication	0.012491	13/153 8.4%	MAGI1 SLC24A2 ERRFI1 NCOA2 RALBP1 NRG1 TICAM1 PPOX PTK2 MLST8 TCF4 RGS11 MAP2K6
cellular developmental process	0.013009	20/153 13.0%	NOTCH2 DLX1 EMX1 LINGO1 DLX2 CREBBP CXADR SORT1 FANCC NRG1 PTK2 GNPTAB SIX5 SLCO4C1 RARB TCF4 PHGDH CNTN4 SGK1 RUNX1T1
gene expression	0.013159	24/153 15.6%	NOTCH2 NCOA2 CREBBP ZRANB2 CSRNP3 TSC22D1 ZFHX4 NUB1 PER3 RPL18A NOB1 TFDP2 AEBP2 TCOF1 EIF3K SIX5 ASXL3 MPHOSPH10 TAF4B RARB TCF4 NAA38 EIF4E RUNX1T1
regulation of gene-specific transcription	0.013159	5/153 3.2%	DLX1 DLX2 TFAP4 PER3 TCF4
positive regulation of sodium ion transport	0.013643	2/153 1.3%	MAGI1 SGK1
cellular response to glucocorticoid stimulus	0.013643	2/153 1.3%	TFAP4 SGK1
cellular response to corticosteroid stimulus	0.013643	2/153 1.3%	TFAP4 SGK1
positive regulation of molecular function	0.013643	8/153 5.2%	RALBP1 CREBBP GM2A EGF NRG1 TICAM1 PPOX MAP2K6
telencephalon development	0.013643	4/153 2.6%	DLX1 EMX1 DLX2 RARB
vesicle-mediated transport	0.015763	9/153 5.8%	TRAPPC3 RALBP1 SNX1 SNAPIN SORT1 SEC22B LIN7B WASF2 COPE
rRNA transcription	0.016262	2/153 1.3%	NUB1 TCOF1
establishment of localization	0.017875	24/153 15.6%	SLC24A2 TRAPPC3 RALBP1 SNAPIN SORT1 PITPNB NIPA1 NRG1 MRPL45 LIN7B PTK2 SNX1 GNPTAB GM2A TCOF1 ASNA1 SLCO4C1 SLC12A6 OSBPL1A SEC22B WASF2 COPE SCN1A VTI1B
central nervous system neuron differentiation	0.019147	4/153 2.6%	DLX1 LINGO1 DLX2 PTK2
intracellular transport	0.020295	8/153 5.2%	TRAPPC3 SNX1 MRPL45 SEC22B LIN7B WASF2 COPE VTI1B
striated muscle cell differentiation	0.020295	4/153 2.6%	CXADR SORT1 RARB NRG1
protein modification process	0.021106	15/153 9.8%	LIPT2 CDS1 CREBBP CDK19 GALNT13 CAMK1D EGF LRRK2 PTK2 PPP2CA WEE1 EEF2K SGK1 ACP1 MAP2K6
cellular component organization	0.022082	21/153 13.7%	LINGO1 RALBP1 CREBBP SUN1 CXADR SORT1 SMARCA5 NRG1 TERF1 PTK2 WEE1 TFAP4 AEBP2 PEX3 EP400 PHGDH KIF2C CNTN4 SGK1 SPTAN1 WASF2
positive regulation of transmission of nerve impulse	0.02273	3/153 1.9%	SLC24A2 PPOX PTK2
Golgi vesicle transport	0.02273	3/153 1.9%	TRAPPC3 SEC22B COPE
protein amino acid phosphorylation	0.02273	10/153 6.5%	CDS1 CDK19 WEE1 EEF2K CAMK1D EGF LRRK2 SGK1 PTK2 MAP2K6
regulation of signal transduction	0.023525	9/153 5.8%	MAGI1 ERRFI1 NCOA2 RALBP1 MLST8 NRG1 RGS11 TICAM1 MAP2K6
positive regulation of ion transport	0.023641	3/153 1.9%	MAGI1 SGK1 PPOX
regulation of protein metabolic process	0.023641	8/153 5.2%	MAGI1 ERRFI1 AGO3 EIF3K EGF MLST8 TICAM1 EIF4E
cerebral cortex neuron differentiation	0.024442	2/153 1.3%	DLX1 DLX2
regulation of signaling process	0.024442	9/153 5.8%	MAGI1 ERRFI1 NCOA2 RALBP1 MLST8 NRG1 RGS11 TICAM1 MAP2K6
positive regulation of neurological system process	0.025277	3/153 1.9%	SLC24A2 PPOX PTK2
signal transmission via phosphorylation event	0.025277	6/153 3.9%	ERRFI1 LINGO1 EGF NRG1 PTK2 MAP2K6
intracellular protein kinase cascade	0.025277	6/153 3.9%	ERRFI1 LINGO1 EGF NRG1 PTK2 MAP2K6
neuron fate commitment	0.026485	3/153 1.9%	DLX1 DLX2 NRG1
macromolecule modification	0.029082	15/153 9.8%	LIPT2 CDS1 CREBBP CDK19 GALNT13 CAMK1D EGF LRRK2 PTK2 PPP2CA WEE1 EEF2K SGK1 ACP1 MAP2K6
transport	0.02924	23/153 15.0%	SLC24A2 TRAPPC3 RALBP1 SNAPIN SORT1 PITPNB NIPA1 NRG1 MRPL45 LIN7B SNX1 GNPTAB GM2A TCOF1 ASNA1 SLCO4C1 SLC12A6 OSBPL1A SEC22B WASF2 COPE SCN1A VTI1B
post-translational protein modification	0.029598	13/153 8.4%	CDS1 CREBBP CDK19 CAMK1D EGF LRRK2 PTK2 PPP2CA WEE1 EEF2K SGK1 ACP1 MAP2K6
regulation of Rho GTPase activity	0.029941	2/153 1.3%	RALBP1 MLST8
phosphorylation	0.029941	11/153 7.1%	CDS1 CDK19 WEE1 EEF2K CAMK1D GNPTAB EGF LRRK2 SGK1 PTK2 MAP2K6
negative regulation of transcription from RNA polymerase II promoter	0.029941	6/153 3.9%	DLX1 NCOA2 DLX2 PER3 RARB TCF4
positive regulation of macromolecule biosynthetic process	0.030254	10/153 6.5%	NCOA2 DLX2 CREBBP CSRNP3 NUFIP1 SMARCA5 RARB TCF4 TICAM1 EIF4E
pallium development	0.030254	3/153 1.9%	DLX1 EMX1 DLX2
regulation of protein polymerization	0.030254	3/153 1.9%	MLST8 SGK1 SPTAN1
heterocycle biosynthetic process	0.030254	3/153 1.9%	LIPT2 PPOX TMEM14C
heme biosynthetic process	0.032217	2/153 1.3%	PPOX TMEM14C
regulation of cellular component biogenesis	0.032217	4/153 2.6%	MLST8 SGK1 SPTAN1 PTK2
neurogenesis	0.032426	10/153 6.5%	DLX1 EMX1 LINGO1 DLX2 RARB PHGDH NRG1 CNTN4 SGK1 PTK2
regulation of gene-specific transcription from RNA polymerase II promoter	0.032519	4/153 2.6%	DLX1 DLX2 PER3 TCF4
central nervous system development	0.032519	7/153 4.5%	DLX1 EMX1 LINGO1 DLX2 RARB PHGDH PTK2
regulation of nervous system development	0.032519	6/153 3.9%	DLX1 LINGO1 DLX2 EGF SGK1 PTK2
forebrain neuron differentiation	0.034749	2/153 1.3%	DLX1 DLX2
transcription	0.035951	17/153 11.1%	NOTCH2 NCOA2 CREBBP CSRNP3 TSC22D1 ZFHX4 NUB1 PER3 TFDP2 AEBP2 TCOF1 SIX5 ASXL3 TAF4B RARB TCF4 RUNX1T1
cardiac muscle tissue development	0.035951	3/153 1.9%	CXADR RARB NRG1
regulation of phosphorylation	0.035951	7/153 4.5%	MAGI1 ERRFI1 EGF MLST8 NRG1 PPOX MAP2K6
embryonic development	0.03626	10/153 6.5%	NOTCH2 GINS1 DLX1 DLX2 DAD1 PITPNB SMARCA5 RARB TCF4 PHGDH
cell development	0.036542	10/153 6.5%	LINGO1 CREBBP CXADR SIX5 FANCC TCF4 PHGDH CNTN4 SGK1 PTK2
muscle cell differentiation	0.036542	4/153 2.6%	CXADR SORT1 RARB NRG1
glutamine metabolic process	0.036542	2/153 1.3%	GGH PHGDH
cellular response to steroid hormone stimulus	0.036542	2/153 1.3%	TFAP4 SGK1
positive regulation of apoptosis	0.036542	6/153 3.9%	NOTCH2 CSRNP3 RARB TICAM1 MAP2K6 DHODH
regulation of peptidyl-tyrosine phosphorylation	0.03743	3/153 1.9%	ERRFI1 EGF MLST8
positive regulation of macromolecule metabolic process	0.037618	11/153 7.1%	NCOA2 DLX2 CREBBP CSRNP3 NUFIP1 SMARCA5 MLST8 RARB TCF4 TICAM1 EIF4E
positive regulation of programmed cell death	0.037625	6/153 3.9%	NOTCH2 CSRNP3 RARB TICAM1 MAP2K6 DHODH
positive regulation of cellular biosynthetic process	0.038243	10/153 6.5%	NCOA2 DLX2 CREBBP CSRNP3 NUFIP1 SMARCA5 RARB TCF4 TICAM1 EIF4E
regulation of receptor activity	0.038535	2/153 1.3%	ERRFI1 NCOA2
cellular protein complex disassembly	0.038535	2/153 1.3%	NRG1 SGK1
ER to Golgi vesicle-mediated transport	0.038535	2/153 1.3%	TRAPPC3 SEC22B
system development	0.039346	21/153 13.7%	NOTCH2 ERRFI1 DLX1 EMX1 LINGO1 DLX2 ASAH1 CXADR SORT1 EGF NRG1 PTK2 UNG PPP2CA SIX5 RARB TCF4 PHGDH CNTN4 SGK1 WASF2
positive regulation of cell death	0.039346	6/153 3.9%	NOTCH2 CSRNP3 RARB TICAM1 MAP2K6 DHODH
regulation of phosphate metabolic process	0.039346	7/153 4.5%	MAGI1 ERRFI1 EGF MLST8 NRG1 PPOX MAP2K6
regulation of phosphorus metabolic process	0.039346	7/153 4.5%	MAGI1 ERRFI1 EGF MLST8 NRG1 PPOX MAP2K6
regulation of protein complex assembly	0.039651	3/153 1.9%	MLST8 SGK1 SPTAN1
positive regulation of biosynthetic process	0.039997	10/153 6.5%	NCOA2 DLX2 CREBBP CSRNP3 NUFIP1 SMARCA5 RARB TCF4 TICAM1 EIF4E
protein complex disassembly	0.04044	2/153 1.3%	NRG1 SGK1
transmission of nerve impulse	0.04044	6/153 3.9%	SNAPIN NRG1 PPOX LIN7B PTK2 SCN1A
positive regulation of cellular metabolic process	0.04044	11/153 7.1%	NCOA2 DLX2 CREBBP CSRNP3 NUFIP1 SMARCA5 MLST8 RARB TCF4 TICAM1 EIF4E
regulation of mitochondrial fission	0.04044	1/153 0.6%	DHODH
MyD88-independent toll-like receptor signaling pathway	0.04044	1/153 0.6%	TICAM1
cholesterol biosynthetic process via 24,25-dihydrolanosterol	0.04044	1/153 0.6%	CYP51
negative regulation of nervous system development	0.04044	1/153 0.6%	PTK2
negative regulation of synaptogenesis	0.04044	1/153 0.6%	PTK2
negative regulation of epidermal growth factor receptor activity	0.04044	1/153 0.6%	ERRFI1
CDP-diacylglycerol biosynthetic process	0.04044	1/153 0.6%	CDS1
maturation of SSU-rRNA	0.04044	1/153 0.6%	NOB1
transcription of nuclear rRNA large RNA polymerase I transcript	0.04044	1/153 0.6%	TCOF1
negative regulation of apoptosis	0.040486	6/153 3.9%	DLX1 TFAP4 DAD1 SGK1 PTK2 UNG
tetrapyrrole biosynthetic process	0.040486	2/153 1.3%	PPOX TMEM14C
porphyrin biosynthetic process	0.040486	2/153 1.3%	PPOX TMEM14C
generation of neurons in the forebrain	0.040486	2/153 1.3%	DLX1 DLX2
cellular macromolecular complex disassembly	0.040486	2/153 1.3%	NRG1 SGK1
MAPKKK cascade	0.04273	4/153 2.6%	EGF NRG1 PTK2 MAP2K6
negative regulation of programmed cell death	0.04273	6/153 3.9%	DLX1 TFAP4 DAD1 SGK1 PTK2 UNG
macromolecular complex disassembly	0.04273	2/153 1.3%	NRG1 SGK1
regulation of translational initiation	0.04273	2/153 1.3%	EIF3K EIF4E
heme metabolic process	0.04273	2/153 1.3%	PPOX TMEM14C
regulation of sodium ion transport	0.04273	2/153 1.3%	MAGI1 SGK1
regulation of protein modification process	0.04273	5/153 3.2%	MAGI1 ERRFI1 EGF MLST8 TICAM1
regulation of protein kinase activity	0.04273	5/153 3.2%	ERRFI1 EGF NRG1 PPOX MAP2K6
regulation of catalytic activity	0.045483	10/153 6.5%	ERRFI1 RALBP1 GM2A EGF MLST8 NRG1 EVI5L RGS11 PPOX MAP2K6
localization	0.045619	24/153 15.6%	SLC24A2 TRAPPC3 RALBP1 SNAPIN SORT1 PITPNB NIPA1 NRG1 MRPL45 LIN7B PTK2 SNX1 GNPTAB GM2A TCOF1 ASNA1 SLCO4C1 SLC12A6 OSBPL1A SEC22B WASF2 COPE SCN1A VTI1B
response to insulin stimulus	0.045619	3/153 1.9%	SORT1 GGH SGK1
rRNA processing	0.045619	3/153 1.9%	NUB1 NOB1 MPHOSPH10
positive regulation of transcription from RNA polymerase II promoter	0.045619	7/153 4.5%	NCOA2 DLX2 CREBBP CSRNP3 NUFIP1 RARB TCF4
generation of neurons	0.046105	9/153 5.8%	DLX1 EMX1 LINGO1 DLX2 PHGDH NRG1 CNTN4 SGK1 PTK2
negative regulation of cell death	0.046248	6/153 3.9%	DLX1 TFAP4 DAD1 SGK1 PTK2 UNG
steroid biosynthetic process	0.046248	3/153 1.9%	HINT2 HMGCS2 CYP51
rRNA metabolic process	0.046248	3/153 1.9%	NUB1 NOB1 MPHOSPH10
cholesterol biosynthetic process	0.04751	2/153 1.3%	HMGCS2 CYP51
positive regulation of catalytic activity	0.047547	6/153 3.9%	RALBP1 GM2A EGF NRG1 PPOX MAP2K6
regulation of kinase activity	0.048126	5/153 3.2%	ERRFI1 EGF NRG1 PPOX MAP2K6
response to hormone stimulus	0.048739	5/153 3.2%	TFAP4 SORT1 GGH ACAA1A SGK1
positive regulation of transport	0.049355	5/153 3.2%	MAGI1 TCF4 SGK1 PPOX PTK2

## Sheet: PFC_Myt1l_H3K4me3_Down
Go description	Corrected p-value	Counts	Genes
cellular process	7.9392e-10	91/155 58.7%	PYGB BTG1 CITED2 CELF2 DOCK7 SLC2A3 KIF11 BZW2 AQP1 ING5 DSTYK RUVBL1 POLI FBXO8 SKP1A GOLGA7 FADS1 PDK2 MORC3 PCDHGA4 FBXO2 ZFP93 SCAMP3 DNM1 TIAM1 XRN2 RPP21 ATG4C VDAC1 TARS2 NCOA7 ADCYAP1R1 SEMA3C GLO1 CSTF3 TCF7 STK39 ISG20L2 LIN7A NLK ADCY8 CACNA1E OAZ1 GTF2E1 HDAC9 MTMR7 PPP2CA MAP2 RBBP5 DVL1 MXI1 HIATL1 CSK VHL RAB6B ST3GAL1 PPARGC1B CLASP2 EGR1 KCNF1 HSPA8 ZBTB17 CREBBP GM10197 POU2F1 U…
cellular macromolecule metabolic process	2.5956e-08	53/155 34.1%	PYGB BTG1 CELF2 ING5 DSTYK RUVBL1 POLI FBXO8 SKP1A PDK2 MORC3 FBXO2 ZFP93 DNM1 XRN2 RPP21 TARS2 NCOA7 CSTF3 TCF7 STK39 NLK GTF2E1 HDAC9 PPP2CA MAP2 RBBP5 DVL1 MXI1 CSK VHL ST3GAL1 PPARGC1B EGR1 HSPA8 ZBTB17 CREBBP GM10197 POU2F1 UBE2B HSPA5 CSNK1A1 XRCC1 TRIP4 CCK MND1 NR1D1 USF1 SMARCA4 ZZZ3 HNRNPF PPT1 TADA1
macromolecule metabolic process	4.1183e-08	56/155 36.1%	PYGB BTG1 CELF2 ING5 DSTYK RUVBL1 POLI FBXO8 SKP1A PDK2 MORC3 FBXO2 ZFP93 DNM1 XRN2 RPP21 YME1L1 TARS2 NCOA7 CSTF3 TCF7 STK39 NLK GTF2E1 HDAC9 PPP2CA DPP6 MAP2 RBBP5 DVL1 MXI1 CSK VHL ST3GAL1 PPARGC1B EGR1 HSPA8 ZBTB17 CREBBP GM10197 POU2F1 UBE2B HSPA5 CSNK1A1 XRCC1 TRIP4 CCK MND1 NR1D1 USF1 SMARCA4 ZZZ3 HNRNPF PPT1 TADA1 CPE
cellular metabolic process	4.1183e-08	63/155 40.6%	PYGB BTG1 CELF2 ING5 DSTYK RUVBL1 POLI FBXO8 SKP1A FADS1 PDK2 MORC3 FBXO2 ZFP93 DNM1 XRN2 RPP21 ATG4C TARS2 NCOA7 GLO1 CSTF3 TCF7 STK39 NLK ADCY8 OAZ1 GTF2E1 HDAC9 MTMR7 PPP2CA MAP2 RBBP5 DVL1 MXI1 CSK VHL ST3GAL1 PPARGC1B EGR1 HSPA8 ZBTB17 CREBBP GM10197 POU2F1 UBE2B HSPA5 CSNK1A1 XRCC1 TRIP4 CCK MND1 NR1D1 USF1 SMARCA4 ZZZ3 HNRNPF PPT1 PCYOX1L TADA1 CPE DEGS1 SERINC5
primary metabolic process	5.2467e-08	64/155 41.2%	PYGB BTG1 CELF2 ING5 DSTYK OSBP RUVBL1 POLI FBXO8 SKP1A FADS1 PDK2 STARD3 MORC3 FBXO2 ZFP93 XRN2 RPP21 YME1L1 TARS2 NCOA7 PLCB1 GLO1 CSTF3 TCF7 STK39 NLK ADCY8 OAZ1 GTF2E1 HDAC9 PPP2CA DPP6 MAP2 RBBP5 MXI1 CSK VHL ST3GAL1 PPARGC1B EGR1 HSPA8 ZBTB17 CREBBP GM10197 POU2F1 UBE2B HSPA5 CSNK1A1 XRCC1 TRIP4 CCK MND1 NR1D1 USF1 SMARCA4 ZZZ3 HNRNPF PPT1 PCYOX1L TADA1 CPE DEGS1 SERINC5
metabolic process	5.2467e-08	70/155 45.1%	PYGB BTG1 CELF2 ING5 DSTYK OSBP RUVBL1 POLI FBXO8 SKP1A FADS1 PDK2 STARD3 MORC3 FBXO2 ZFP93 DNM1 XRN2 RPP21 ATG4C YME1L1 TARS2 NCOA7 PLCB1 GLO1 MGST3 CSTF3 TCF7 STK39 NLK ADCY8 OAZ1 GTF2E1 HDAC9 MTMR7 PPP2CA DPP6 CYP4X1 MAP2 RBBP5 DVL1 MXI1 CSK VHL ST3GAL1 PPARGC1B EGR1 HSPA8 ZBTB17 CREBBP GM10197 POU2F1 UBE2B HSPA5 CSNK1A1 XRCC1 TRIP4 CCK MND1 NR1D1 USF1 SMARCA4 ZZZ3 HNRNPF PPT1 PCYOX1L TADA1 CP…
nucleic acid metabolic process	0.00010499	32/155 20.6%	CSTF3 CELF2 TCF7 NLK GTF2E1 HDAC9 ING5 RBBP5 RUVBL1 MXI1 POLI PPARGC1B EGR1 ZBTB17 CREBBP GM10197 POU2F1 UBE2B XRCC1 TRIP4 MND1 NR1D1 ZFP93 USF1 SMARCA4 ZZZ3 HNRNPF XRN2 RPP21 TADA1 TARS2 NCOA7
regulation of primary metabolic process	0.00015982	34/155 21.9%	ADCYAP1R1 CITED2 SMEK2 TCF7 NLK GTF2E1 HDAC9 ING5 RBBP5 RUVBL1 MXI1 VHL PPARGC1B EGR1 ZBTB17 CREBBP GM10197 POU2F1 UBE2B HSPA5 FBXO2 TRIP4 CCK NR1D1 ZFP93 USF1 SMARCA4 TBC1D1 ZZZ3 TFAP4 XRN2 PPP1R3D TADA1 NCOA7
regulation of macromolecule metabolic process	0.00017779	33/155 21.2%	CITED2 TCF7 NLK GTF2E1 HDAC9 ING5 RBBP5 RUVBL1 MXI1 VHL PPARGC1B EGR1 ZBTB17 MORC3 CREBBP GM10197 POU2F1 UBE2B HSPA5 FBXO2 TRIP4 CCK NR1D1 ZFP93 USF1 SMARCA4 ZZZ3 TFAP4 XRN2 PPP1R3D TADA1 NCOA7 APBA1
regulation of metabolic process	0.00020394	36/155 23.2%	ADCYAP1R1 CITED2 SMEK2 TCF7 NLK GTF2E1 HDAC9 ING5 RBBP5 RUVBL1 MXI1 VHL PPARGC1B EGR1 ZBTB17 MORC3 CREBBP GM10197 POU2F1 UBE2B HSPA5 FBXO2 TRIP4 CCK NR1D1 ZFP93 USF1 SMARCA4 TBC1D1 ZZZ3 TFAP4 XRN2 PPP1R3D TADA1 NCOA7 APBA1
regulation of transcription	0.00021171	28/155 18.0%	CITED2 TCF7 NLK GTF2E1 HDAC9 ING5 RBBP5 RUVBL1 MXI1 VHL PPARGC1B EGR1 ZBTB17 CREBBP GM10197 POU2F1 UBE2B TRIP4 CCK NR1D1 ZFP93 USF1 SMARCA4 ZZZ3 TFAP4 XRN2 TADA1 NCOA7
nucleobase, nucleoside, nucleotide and nucleic acid metabolic process	0.00021171	34/155 21.9%	CSTF3 CELF2 TCF7 NLK ADCY8 GTF2E1 HDAC9 ING5 RBBP5 RUVBL1 MXI1 POLI PPARGC1B EGR1 HSPA8 ZBTB17 CREBBP GM10197 POU2F1 UBE2B XRCC1 TRIP4 MND1 NR1D1 ZFP93 USF1 SMARCA4 ZZZ3 HNRNPF XRN2 RPP21 TADA1 TARS2 NCOA7
regulation of nucleobase, nucleoside, nucleotide and nucleic acid metabolic process	0.00021171	30/155 19.3%	ADCYAP1R1 CITED2 TCF7 NLK GTF2E1 HDAC9 ING5 RBBP5 RUVBL1 MXI1 VHL PPARGC1B EGR1 ZBTB17 CREBBP GM10197 POU2F1 UBE2B TRIP4 CCK NR1D1 ZFP93 USF1 SMARCA4 TBC1D1 ZZZ3 TFAP4 XRN2 TADA1 NCOA7
regulation of gene expression	0.00021171	30/155 19.3%	CITED2 TCF7 NLK GTF2E1 HDAC9 ING5 RBBP5 RUVBL1 MXI1 VHL PPARGC1B EGR1 ZBTB17 MORC3 CREBBP GM10197 POU2F1 UBE2B TRIP4 CCK NR1D1 ZFP93 USF1 SMARCA4 ZZZ3 TFAP4 XRN2 TADA1 NCOA7 APBA1
regulation of nitrogen compound metabolic process	0.00024316	30/155 19.3%	ADCYAP1R1 CITED2 TCF7 NLK GTF2E1 HDAC9 ING5 RBBP5 RUVBL1 MXI1 VHL PPARGC1B EGR1 ZBTB17 CREBBP GM10197 POU2F1 UBE2B TRIP4 CCK NR1D1 ZFP93 USF1 SMARCA4 TBC1D1 ZZZ3 TFAP4 XRN2 TADA1 NCOA7
regulation of cellular biosynthetic process	0.00028711	30/155 19.3%	ADCYAP1R1 CITED2 TCF7 NLK GTF2E1 HDAC9 ING5 RBBP5 RUVBL1 MXI1 VHL PPARGC1B EGR1 ZBTB17 CREBBP GM10197 POU2F1 UBE2B TRIP4 CCK NR1D1 ZFP93 USF1 SMARCA4 ZZZ3 TFAP4 XRN2 PPP1R3D TADA1 NCOA7
regulation of macromolecule biosynthetic process	0.000294	29/155 18.7%	CITED2 TCF7 NLK GTF2E1 HDAC9 ING5 RBBP5 RUVBL1 MXI1 VHL PPARGC1B EGR1 ZBTB17 CREBBP GM10197 POU2F1 UBE2B TRIP4 CCK NR1D1 ZFP93 USF1 SMARCA4 ZZZ3 TFAP4 XRN2 PPP1R3D TADA1 NCOA7
regulation of biosynthetic process	0.00030924	30/155 19.3%	ADCYAP1R1 CITED2 TCF7 NLK GTF2E1 HDAC9 ING5 RBBP5 RUVBL1 MXI1 VHL PPARGC1B EGR1 ZBTB17 CREBBP GM10197 POU2F1 UBE2B TRIP4 CCK NR1D1 ZFP93 USF1 SMARCA4 ZZZ3 TFAP4 XRN2 PPP1R3D TADA1 NCOA7
cellular nitrogen compound metabolic process	0.00032633	35/155 22.5%	CSTF3 CELF2 TCF7 NLK ADCY8 OAZ1 GTF2E1 HDAC9 ING5 RBBP5 RUVBL1 MXI1 POLI PPARGC1B EGR1 HSPA8 ZBTB17 CREBBP GM10197 POU2F1 UBE2B XRCC1 TRIP4 MND1 NR1D1 ZFP93 USF1 SMARCA4 ZZZ3 HNRNPF XRN2 RPP21 TADA1 TARS2 NCOA7
nervous system development	0.00043705	18/155 11.6%	HSPA5 SEMA3C CITED2 TCF7 DOCK7 CCK BZW2 HDAC9 AQP1 SMARCA4 TIAM1 NFASC MAP2 DVL1 CNTN2 NCOA7 VHL SERINC5
regulation of cellular metabolic process	0.0004677	33/155 21.2%	ADCYAP1R1 CITED2 TCF7 NLK GTF2E1 HDAC9 ING5 RBBP5 RUVBL1 MXI1 VHL PPARGC1B EGR1 ZBTB17 CREBBP GM10197 POU2F1 UBE2B HSPA5 FBXO2 TRIP4 CCK NR1D1 ZFP93 USF1 SMARCA4 TBC1D1 ZZZ3 TFAP4 XRN2 PPP1R3D TADA1 NCOA7
nitrogen compound metabolic process	0.00052694	35/155 22.5%	CSTF3 CELF2 TCF7 NLK ADCY8 OAZ1 GTF2E1 HDAC9 ING5 RBBP5 RUVBL1 MXI1 POLI PPARGC1B EGR1 HSPA8 ZBTB17 CREBBP GM10197 POU2F1 UBE2B XRCC1 TRIP4 MND1 NR1D1 ZFP93 USF1 SMARCA4 ZZZ3 HNRNPF XRN2 RPP21 TADA1 TARS2 NCOA7
transcription	0.00056316	23/155 14.8%	EGR1 ZBTB17 CREBBP GM10197 POU2F1 TCF7 TRIP4 NR1D1 ZFP93 NLK GTF2E1 HDAC9 USF1 SMARCA4 ING5 ZZZ3 RBBP5 RUVBL1 XRN2 MXI1 TADA1 NCOA7 PPARGC1B
gene expression	0.00056316	29/155 18.7%	CSTF3 CELF2 TCF7 NLK GTF2E1 HDAC9 ING5 RBBP5 RUVBL1 MXI1 PPARGC1B EGR1 ZBTB17 CREBBP GM10197 POU2F1 TRIP4 NR1D1 ZFP93 USF1 SMARCA4 ZZZ3 HNRNPF XRN2 RPP21 TADA1 CPE TARS2 NCOA7
biological regulation	0.0017232	61/155 39.3%	BTG1 CITED2 SMEK2 SLC2A3 AQP1 ING5 RUVBL1 FBXO8 PDK2 MORC3 FBXO2 ZFP93 TIAM1 TBC1D1 OLFR679 XRN2 PPP1R3D VDAC1 NCOA7 PLCB1 ADCYAP1R1 TCF7 STK39 LIN7A NLK ADCY8 CACNA1E OAZ1 GTF2E1 HDAC9 PPP2CA MAP2 RBBP5 DVL1 MXI1 CSK VHL RAB6B PPARGC1B CLASP2 EGR1 HSPA8 ZBTB17 CREBBP GM10197 POU2F1 UBE2B HSPA5 TRIP4 CCK NR1D1 USF1 SMARCA4 ZZZ3 TFAP4 PPT1 TADA1 CPE MDM4 APBA1 SERINC5
cellular macromolecule biosynthetic process	0.0024815	26/155 16.7%	TCF7 NLK GTF2E1 HDAC9 ING5 RBBP5 RUVBL1 MXI1 POLI ST3GAL1 PPARGC1B EGR1 ZBTB17 CREBBP GM10197 POU2F1 TRIP4 NR1D1 ZFP93 USF1 SMARCA4 ZZZ3 XRN2 TADA1 TARS2 NCOA7
protein catabolic process	0.0024938	7/155 4.5%	HSPA5 FBXO2 PPT1 YME1L1 VHL FBXO8 SKP1A
macromolecule biosynthetic process	0.0024938	26/155 16.7%	TCF7 NLK GTF2E1 HDAC9 ING5 RBBP5 RUVBL1 MXI1 POLI ST3GAL1 PPARGC1B EGR1 ZBTB17 CREBBP GM10197 POU2F1 TRIP4 NR1D1 ZFP93 USF1 SMARCA4 ZZZ3 XRN2 TADA1 TARS2 NCOA7
biosynthetic process	0.0028696	31/155 20.0%	TCF7 NLK ADCY8 GTF2E1 HDAC9 ING5 RBBP5 RUVBL1 MXI1 POLI ST3GAL1 FADS1 PPARGC1B STARD3 EGR1 ZBTB17 CREBBP GM10197 POU2F1 TRIP4 NR1D1 ZFP93 USF1 SMARCA4 ZZZ3 XRN2 TADA1 TARS2 DEGS1 NCOA7 SERINC5
protein modification process	0.0031031	18/155 11.6%	MORC3 CREBBP BTG1 UBE2B CSNK1A1 FBXO2 STK39 CCK NLK PPP2CA DSTYK MAP2 PPT1 CSK VHL SKP1A ST3GAL1 PDK2
cellular protein metabolic process	0.0034661	22/155 14.1%	HSPA8 MORC3 CREBBP BTG1 UBE2B HSPA5 CSNK1A1 FBXO2 STK39 CCK NLK PPP2CA DSTYK MAP2 PPT1 TARS2 CSK VHL FBXO8 SKP1A ST3GAL1 PDK2
cellular biosynthetic process	0.0034661	30/155 19.3%	TCF7 NLK ADCY8 GTF2E1 HDAC9 ING5 RBBP5 RUVBL1 MXI1 POLI ST3GAL1 FADS1 PPARGC1B EGR1 ZBTB17 CREBBP GM10197 POU2F1 TRIP4 NR1D1 ZFP93 USF1 SMARCA4 ZZZ3 XRN2 TADA1 TARS2 DEGS1 NCOA7 SERINC5
macromolecule catabolic process	0.0034661	8/155 5.1%	PYGB HSPA5 FBXO2 PPT1 YME1L1 VHL FBXO8 SKP1A
negative regulation of cellular process	0.0034661	20/155 12.9%	EGR1 MORC3 ADCYAP1R1 CREBBP GM10197 POU2F1 BTG1 UBE2B HSPA5 FBXO2 SLC2A3 NLK HDAC9 SMARCA4 TFAP4 MAP2 MXI1 CSK VHL CLASP2
developmental process	0.003716	31/155 20.0%	INVS ADCYAP1R1 SEMA3C CITED2 TCF7 DOCK7 BZW2 HDAC9 AQP1 PPP2CA MAP2 DVL1 VHL EGR1 ZBTB17 MORC3 CREBBP PHC2 POU2F1 UBE2B HSPA5 CSNK1A1 CCK SMARCA4 TIAM1 NFASC CNTN2 NCOA7 APBA1 PVRL3 SERINC5
post-translational protein modification	0.003716	16/155 10.3%	MORC3 CREBBP BTG1 UBE2B CSNK1A1 FBXO2 STK39 CCK NLK PPP2CA DSTYK MAP2 CSK VHL SKP1A PDK2
Wnt receptor signaling pathway	0.0039959	6/155 3.8%	INVS UBE2B CSNK1A1 TCF7 DVL1 NLK
macromolecule modification	0.0044474	18/155 11.6%	MORC3 CREBBP BTG1 UBE2B CSNK1A1 FBXO2 STK39 CCK NLK PPP2CA DSTYK MAP2 PPT1 CSK VHL SKP1A ST3GAL1 PDK2
anatomical structure development	0.004502	27/155 17.4%	INVS SEMA3C CITED2 TCF7 DOCK7 BZW2 HDAC9 AQP1 PPP2CA MAP2 DVL1 VHL EGR1 ZBTB17 CREBBP POU2F1 UBE2B HSPA5 CSNK1A1 CCK SMARCA4 TIAM1 NFASC CNTN2 NCOA7 PVRL3 SERINC5
cellular component organization	0.004502	24/155 15.4%	CREBBP UBE2B CSNK1A1 CELF2 CCK KIF11 GTF2E1 HDAC9 DNM1 AQP1 SMARCA4 ING5 NFASC TFAP4 MAP2 RBBP5 RUVBL1 XRN2 DVL1 PPT1 CNTN2 NCOA7 VHL CLASP2
catabolic process	0.0049199	14/155 9.0%	HSPA8 PYGB HSPA5 FBXO2 SMARCA4 PPT1 ATG4C PCYOX1L YME1L1 NCOA7 VHL FBXO8 SKP1A PLCB1
negative regulation of biological process	0.0049967	21/155 13.5%	EGR1 MORC3 ADCYAP1R1 CREBBP GM10197 POU2F1 BTG1 UBE2B HSPA5 FBXO2 SLC2A3 CCK NLK HDAC9 SMARCA4 TFAP4 MAP2 MXI1 CSK VHL CLASP2
multicellular organismal development	0.0050486	29/155 18.7%	INVS ADCYAP1R1 SEMA3C CITED2 TCF7 DOCK7 BZW2 HDAC9 AQP1 PPP2CA MAP2 DVL1 VHL EGR1 ZBTB17 MORC3 PHC2 POU2F1 UBE2B HSPA5 CCK SMARCA4 TIAM1 NFASC CNTN2 NCOA7 APBA1 PVRL3 SERINC5
protein metabolic process	0.0050852	25/155 16.1%	BTG1 STK39 NLK PPP2CA DPP6 DSTYK MAP2 CSK VHL FBXO8 SKP1A ST3GAL1 PDK2 HSPA8 MORC3 CREBBP UBE2B HSPA5 CSNK1A1 FBXO2 CCK PPT1 YME1L1 CPE TARS2
signal release	0.0060084	5/155 3.2%	DVL1 PPT1 LIN7A APBA1 AQP1
generation of a signal involved in cell-cell signaling	0.0060084	5/155 3.2%	DVL1 PPT1 LIN7A APBA1 AQP1
regulation of biological process	0.0089763	55/155 35.4%	BTG1 CITED2 SMEK2 SLC2A3 AQP1 ING5 RUVBL1 FBXO8 PDK2 MORC3 FBXO2 ZFP93 TIAM1 TBC1D1 OLFR679 XRN2 PPP1R3D VDAC1 NCOA7 PLCB1 ADCYAP1R1 TCF7 STK39 NLK ADCY8 CACNA1E GTF2E1 HDAC9 PPP2CA MAP2 RBBP5 MXI1 CSK VHL RAB6B PPARGC1B CLASP2 EGR1 HSPA8 ZBTB17 CREBBP GM10197 POU2F1 UBE2B HSPA5 TRIP4 CCK NR1D1 USF1 SMARCA4 ZZZ3 TFAP4 TADA1 MDM4 APBA1
chromatin modification	0.0090813	7/155 4.5%	ING5 CREBBP UBE2B RBBP5 RUVBL1 HDAC9 SMARCA4
system development	0.012535	24/155 15.4%	INVS EGR1 ZBTB17 POU2F1 HSPA5 SEMA3C CITED2 TCF7 DOCK7 CCK BZW2 HDAC9 AQP1 SMARCA4 PPP2CA TIAM1 NFASC MAP2 DVL1 CNTN2 NCOA7 VHL PVRL3 SERINC5
negative regulation of transcription	0.013153	9/155 5.8%	EGR1 GM10197 POU2F1 TFAP4 UBE2B MXI1 VHL HDAC9 SMARCA4
negative regulation of transcription, DNA-dependent	0.013153	8/155 5.1%	EGR1 GM10197 TFAP4 UBE2B MXI1 VHL HDAC9 SMARCA4
negative regulation of RNA metabolic process	0.013662	8/155 5.1%	EGR1 GM10197 TFAP4 UBE2B MXI1 VHL HDAC9 SMARCA4
regulation of cellular process	0.014879	52/155 33.5%	BTG1 CITED2 SLC2A3 AQP1 ING5 RUVBL1 FBXO8 PDK2 MORC3 FBXO2 ZFP93 TIAM1 TBC1D1 OLFR679 XRN2 PPP1R3D VDAC1 NCOA7 PLCB1 ADCYAP1R1 TCF7 NLK ADCY8 CACNA1E GTF2E1 HDAC9 PPP2CA MAP2 RBBP5 MXI1 CSK VHL RAB6B PPARGC1B CLASP2 EGR1 HSPA8 ZBTB17 CREBBP GM10197 POU2F1 UBE2B HSPA5 TRIP4 CCK NR1D1 USF1 SMARCA4 ZZZ3 TFAP4 TADA1 MDM4
anatomical structure morphogenesis	0.015395	16/155 10.3%	ZBTB17 POU2F1 UBE2B HSPA5 SEMA3C CITED2 CSNK1A1 TCF7 CCK AQP1 SMARCA4 NFASC DVL1 CNTN2 VHL PVRL3
regulation of transcription, DNA-dependent	0.016093	16/155 10.3%	EGR1 ZBTB17 CREBBP GM10197 POU2F1 UBE2B CITED2 TCF7 NR1D1 ZFP93 HDAC9 USF1 SMARCA4 TFAP4 MXI1 VHL
regulation of RNA metabolic process	0.018846	16/155 10.3%	EGR1 ZBTB17 CREBBP GM10197 POU2F1 UBE2B CITED2 TCF7 NR1D1 ZFP93 HDAC9 USF1 SMARCA4 TFAP4 MXI1 VHL
negative regulation of nucleobase, nucleoside, nucleotide and nucleic acid metabolic process	0.018938	9/155 5.8%	EGR1 GM10197 POU2F1 TFAP4 UBE2B MXI1 VHL HDAC9 SMARCA4
M phase	0.020965	7/155 4.5%	PPP2CA UBE2B CSNK1A1 RUVBL1 MND1 KIF11 CLASP2
negative regulation of nitrogen compound metabolic process	0.020965	9/155 5.8%	EGR1 GM10197 POU2F1 TFAP4 UBE2B MXI1 VHL HDAC9 SMARCA4
chromatin organization	0.021154	7/155 4.5%	ING5 CREBBP UBE2B RBBP5 RUVBL1 HDAC9 SMARCA4
negative regulation of macromolecule biosynthetic process	0.024895	9/155 5.8%	EGR1 GM10197 POU2F1 TFAP4 UBE2B MXI1 VHL HDAC9 SMARCA4
negative regulation of gene expression	0.025206	9/155 5.8%	EGR1 GM10197 POU2F1 TFAP4 UBE2B MXI1 VHL HDAC9 SMARCA4
organelle organization	0.025939	14/155 9.0%	CREBBP UBE2B CSNK1A1 CCK KIF11 HDAC9 AQP1 SMARCA4 ING5 MAP2 RBBP5 RUVBL1 PPT1 CLASP2
cellular response to stimulus	0.026899	11/155 7.0%	EGR1 TFAP4 UBE2B HSPA5 RBBP5 XRN2 XRCC1 POLI NCOA7 CCK USF1
neurotransmitter secretion	0.026899	3/155 1.9%	DVL1 PPT1 LIN7A
cellular protein catabolic process	0.026899	5/155 3.2%	HSPA5 FBXO2 PPT1 FBXO8 SKP1A
negative regulation of cellular biosynthetic process	0.027233	9/155 5.8%	EGR1 GM10197 POU2F1 TFAP4 UBE2B MXI1 VHL HDAC9 SMARCA4
negative regulation of biosynthetic process	0.029543	9/155 5.8%	EGR1 GM10197 POU2F1 TFAP4 UBE2B MXI1 VHL HDAC9 SMARCA4
macromolecular complex subunit organization	0.033115	8/155 5.1%	TFAP4 CELF2 XRN2 DVL1 NCOA7 VHL GTF2E1 SMARCA4
M phase of meiotic cell cycle	0.033554	4/155 2.5%	PPP2CA UBE2B MND1 CLASP2
meiosis	0.033554	4/155 2.5%	PPP2CA UBE2B MND1 CLASP2
cell cycle phase	0.033803	7/155 4.5%	PPP2CA UBE2B CSNK1A1 RUVBL1 MND1 KIF11 CLASP2
meiotic cell cycle	0.033884	4/155 2.5%	PPP2CA UBE2B MND1 CLASP2
lens morphogenesis in camera-type eye	0.035538	2/155 1.2%	POU2F1 PVRL3
regulation of microtubule depolymerization	0.035538	2/155 1.2%	MAP2 CLASP2
negative regulation of microtubule depolymerization	0.035538	2/155 1.2%	MAP2 CLASP2
microtubule bundle formation	0.035538	2/155 1.2%	UBE2B MAP2
cellular developmental process	0.040269	19/155 12.2%	EGR1 ADCYAP1R1 CREBBP POU2F1 UBE2B SEMA3C CITED2 CSNK1A1 DOCK7 CCK BZW2 HDAC9 SMARCA4 TIAM1 NFASC MAP2 DVL1 CNTN2 VHL
transcription initiation from RNA polymerase II promoter	0.040269	2/155 1.2%	NCOA7 GTF2E1
cell communication	0.042636	9/155 5.8%	POU2F1 DVL1 PPT1 VDAC1 LIN7A APBA1 SERINC5 USF1 AQP1
camera-type eye morphogenesis	0.045807	3/155 1.9%	POU2F1 PVRL3 AQP1
cellular localization	0.046276	10/155 6.4%	MORC3 DVL1 PPT1 CNTN2 VDAC1 LIN7A APBA1 GOLGA7 SCAMP3 AQP1
negative regulation of transcription from RNA polymerase II promoter	0.047224	6/155 3.8%	EGR1 GM10197 MXI1 VHL HDAC9 SMARCA4
negative regulation of microtubule polymerization or depolymerization	0.04902	2/155 1.2%	MAP2 CLASP2
chromosome organization	0.04902	7/155 4.5%	ING5 CREBBP UBE2B RBBP5 RUVBL1 HDAC9 SMARCA4

## Sheet: PFC_Myt1l_H3K4me1_Up
Go description	Corrected p-value	Counts	Genes
cellular process	3.0096e-08	95/172 55.2%	PIGS ITK SNAP25 SLC46A1 EIF4E3 ATP8A1 MTMR11 PCDHGB2 HIST2H2AB TXNDC11 TSEN54 MYLK HIST2H2AC RPS14 SUMO2 BBS7 HMGN3 SH3GL1 SEMA6B PIAS3 MEF2C USP7 MKKS PCDHGA5 CSNK2A1 SSR3 PIPOX MRPS7 YWHAZ HIST2H2BE RAD51B FCGR1 CACNB4 TRAF4 SLC25A19 MED21 RAB34 SLC9A9 ULK3 ALDOC RIN1 SGK1 BIRC2 RBM22 SF3B4 SPATA9 KHDRBS3 POLDIP2 TIMM9 ITPR1 ADCY3 RNF7 TYMS PLD1 KALRN SUPT6H NT5C EFNB2 TBRG1 BCL2L10 GGA3 TCOF1 …
metabolic process	0.004088	64/172 37.2%	PIGS ITK DHRS13 EIF4E3 ATP8A1 MTMR11 PIGN TSEN54 MYLK CNDP2 RPS14 SUMO2 PIAS3 MEF2C USP7 MKKS IAH1 CSNK2A1 PIPOX MRPS7 SAFB RAD51B CACNB4 MED21 BC030336 RAB34 ULK3 ALDOC SGK1 GAPDH RBM22 B4GALT5 SF3B4 KHDRBS3 ADCY3 TYMS PLD1 KALRN SUPT6H APH1A NEU2 NT5C TBRG1 TCOF1 BAG2 ICT1 ATXN7 STK38L SC5D MAPK6 NEK8 CD74 SLC37A2 CPSF3 PHF12 PMM2 BC026585 GLUD1 FABP5 ERCC4 TAOK1 GSTM5 CDS2 GALK1
macromolecular complex subunit organization	0.012703	11/172 6.3%	RPS14 CD74 DIAPH1 ICT1 HIST2H2AB GRB2 ALDOC SGK1 HIST2H2BE BIRC2 HIST2H2AC
cellular component organization	0.012703	27/172 15.6%	POLDIP2 TIMM9 HIST2H2AB RNF7 KALRN HIST2H2AC RPS14 NUP85 ICT1 HMGN3 SH3GL1 CD74 MKKS SPAG5 HOOK3 YWHAZ HIST2H2BE FCGR1 DIAPH1 CACNB4 RAB34 CCNG1 GRB2 ALDOC RIN1 SGK1 BIRC2
primary metabolic process	0.016611	54/172 31.3%	PIGS ITK EIF4E3 ATP8A1 TSEN54 MYLK CNDP2 RPS14 SUMO2 PIAS3 MEF2C USP7 MKKS IAH1 CSNK2A1 MRPS7 RAD51B CACNB4 MED21 RAB34 ULK3 ALDOC SGK1 RBM22 B4GALT5 SF3B4 KHDRBS3 ADCY3 TYMS PLD1 KALRN SUPT6H APH1A NT5C TBRG1 TCOF1 BAG2 ICT1 ATXN7 STK38L SC5D MAPK6 NEK8 CD74 SLC37A2 CPSF3 PHF12 PMM2 GLUD1 FABP5 ERCC4 TAOK1 CDS2 GALK1
labyrinthine layer morphogenesis	0.016611	3/172 1.7%	IL10 DNAJB6 GRB2
cellular macromolecular complex subunit organization	0.016611	7/172 4.0%	RPS14 DIAPH1 ICT1 HIST2H2AB SGK1 HIST2H2BE HIST2H2AC
transport	0.016611	29/172 16.8%	SNAP25 SLC46A1 ATP8A1 TIMM9 ITPR1 KALRN TBRG1 GGA3 TCOF1 NUP85 SV2A RAB6B SH3GL1 CD74 SLC37A2 SLC31A2 SSR3 SNX24 HOOK3 YWHAZ FCGR1 CACNB4 KCNS1 FABP5 NBEA SLC25A19 RAB34 SLC9A9 RIN1
establishment of localization	0.016993	29/172 16.8%	SNAP25 SLC46A1 ATP8A1 TIMM9 ITPR1 KALRN TBRG1 GGA3 TCOF1 NUP85 SV2A RAB6B SH3GL1 CD74 SLC37A2 SLC31A2 SSR3 SNX24 HOOK3 YWHAZ FCGR1 CACNB4 KCNS1 FABP5 NBEA SLC25A19 RAB34 SLC9A9 RIN1
cellular metabolic process	0.03198	51/172 29.6%	PIGS ITK EIF4E3 ATP8A1 MTMR11 TSEN54 MYLK RPS14 SUMO2 PIAS3 MEF2C USP7 MKKS CSNK2A1 PIPOX MRPS7 RAD51B CACNB4 MED21 RAB34 ULK3 ALDOC SGK1 RBM22 SF3B4 KHDRBS3 ADCY3 TYMS PLD1 KALRN SUPT6H NT5C TBRG1 TCOF1 ICT1 ATXN7 STK38L SC5D MAPK6 NEK8 CD74 SLC37A2 CPSF3 PHF12 PMM2 GLUD1 FABP5 ERCC4 TAOK1 CDS2 GALK1
cellular component assembly	0.049316	11/172 6.3%	RPS14 CD74 DIAPH1 MKKS NUP85 HIST2H2AB GRB2 ALDOC HIST2H2BE BIRC2 HIST2H2AC
macromolecular complex assembly	0.049316	9/172 5.2%	RPS14 CD74 DIAPH1 HIST2H2AB GRB2 ALDOC HIST2H2BE BIRC2 HIST2H2AC

## Sheet: PFC_Myt1l_H3K4me1_Down
Go description	Corrected p-value	Counts	Genes
cellular process	0.0013397	50/92 54.3%	CDA PTPRO TNC ZBTB20 MTR MEA1 KRTCAP2 EDRF1 SIL1 MCCC2 ABCC3 DUSP5 AGTPBP1 LMO4 SLC2A12 PRPF4B ASH1L CGRRF1 ZEB2 IVD PPAP2A ELMO1 CKS2 LUC7L3 SKIV2L2 DAP3 NFIX SHC1 UBR2 CLCN3 MED12L PSMB7 NXF1 EMG1 NRIP1 PTK2B ZSWIM7 EXPH5 KLHDC3 SEMA4D TXNRD1 EPT1 TRERF1 GADD45G CLK2 RIT1 PCYOX1L CPE TAF4B APBA1
cellular metabolic process	0.0013397	36/92 39.1%	CDA NFIX SHC1 PTPRO ZBTB20 UBR2 MTR MED12L PSMB7 KRTCAP2 EMG1 EDRF1 NRIP1 PTK2B ZSWIM7 MCCC2 ABCC3 DUSP5 AGTPBP1 LMO4 TXNRD1 EPT1 PRPF4B ASH1L TRERF1 GADD45G CLK2 ZEB2 RIT1 IVD PPAP2A PCYOX1L CPE TAF4B LUC7L3 SKIV2L2
metabolic process	0.0038715	39/92 42.3%	CDA NFIX SHC1 PTPRO ZBTB20 UBR2 MTR MED12L PSMB7 KRTCAP2 EMG1 EDRF1 NRIP1 PTK2B ZSWIM7 MCCC2 ABCC3 DUSP5 AGTPBP1 LMO4 TXNRD1 EPT1 GPX8 PRPF4B HS3ST5 ASH1L TRERF1 OXR1 GADD45G CLK2 ZEB2 RIT1 IVD PPAP2A PCYOX1L CPE TAF4B LUC7L3 SKIV2L2
primary metabolic process	0.021404	33/92 35.8%	CDA NFIX SHC1 ZBTB20 UBR2 MTR MED12L PSMB7 KRTCAP2 EMG1 EDRF1 NRIP1 PTK2B ZSWIM7 MCCC2 ABCC3 AGTPBP1 LMO4 EPT1 PRPF4B ASH1L TRERF1 GADD45G CLK2 ZEB2 RIT1 IVD PPAP2A PCYOX1L CPE TAF4B LUC7L3 SKIV2L2
nitrogen compound metabolic process	0.021404	22/92 23.9%	MCCC2 ABCC3 CDA NFIX LMO4 ZBTB20 PRPF4B MTR ASH1L TRERF1 MED12L EMG1 EDRF1 ZEB2 RIT1 IVD PPAP2A NRIP1 TAF4B LUC7L3 ZSWIM7 SKIV2L2
macromolecule metabolic process	0.021404	28/92 30.4%	NFIX SHC1 ZBTB20 UBR2 MTR MED12L PSMB7 KRTCAP2 EMG1 EDRF1 NRIP1 PTK2B ZSWIM7 AGTPBP1 LMO4 PRPF4B ASH1L TRERF1 OXR1 GADD45G CLK2 ZEB2 RIT1 PPAP2A CPE TAF4B LUC7L3 SKIV2L2
regulation of phosphorylation	0.021404	7/92 7.6%	RPTOR ZEB2 AKAP11 SHC1 CAMK2N1 PTK2B GADD45G
regulation of phosphate metabolic process	0.021404	7/92 7.6%	RPTOR ZEB2 AKAP11 SHC1 CAMK2N1 PTK2B GADD45G
regulation of phosphorus metabolic process	0.021404	7/92 7.6%	RPTOR ZEB2 AKAP11 SHC1 CAMK2N1 PTK2B GADD45G
regulation of metabolic process	0.021404	21/92 22.8%	DUSP5 NFIX LMO4 SHC1 TNC ZBTB20 MTR ASH1L TRERF1 MED12L GADD45G RPTOR EDRF1 ZEB2 RIT1 AKAP11 CAMK2N1 NRIP1 TAF4B PTK2B APBA1
nucleobase, nucleoside, nucleotide and nucleic acid metabolic process	0.021404	20/92 21.7%	MCCC2 ABCC3 CDA NFIX LMO4 ZBTB20 PRPF4B MTR ASH1L TRERF1 MED12L EMG1 EDRF1 ZEB2 RIT1 NRIP1 TAF4B LUC7L3 ZSWIM7 SKIV2L2
cellular nitrogen compound metabolic process	0.021404	21/92 22.8%	MCCC2 ABCC3 CDA NFIX LMO4 ZBTB20 PRPF4B MTR ASH1L TRERF1 MED12L EMG1 EDRF1 ZEB2 RIT1 IVD NRIP1 TAF4B LUC7L3 ZSWIM7 SKIV2L2
regulation of cellular metabolic process	0.021751	20/92 21.7%	DUSP5 NFIX LMO4 SHC1 TNC ZBTB20 MTR ASH1L TRERF1 MED12L GADD45G RPTOR EDRF1 ZEB2 RIT1 AKAP11 CAMK2N1 NRIP1 TAF4B PTK2B
cellular macromolecule metabolic process	0.02247	25/92 27.1%	NFIX SHC1 ZBTB20 UBR2 MTR MED12L PSMB7 KRTCAP2 EMG1 EDRF1 NRIP1 PTK2B ZSWIM7 LMO4 PRPF4B ASH1L TRERF1 GADD45G CLK2 ZEB2 RIT1 PPAP2A TAF4B LUC7L3 SKIV2L2
