# Supplementary material for: MYT1L is required for suppressing earlier neuronal development programs in the adult mouse brain
Source: Genome Res. 2023 Apr;33(4):541–56. doi: 10.1101/gr.277413.122 (PMC10234307; doi:10.1101/gr.277413.122)
Supplement: Supplemental Material [file supp_gr.277413.122_Supplemental_Table_S5.xlsx]

## Sheet: MYT1L_PFC_TSS_Genes
Supplemental Table S5. MYT1L promoter and enhancer target gene predictions
PeakID	Chr	Start	End	Gene Name
2_wt.q.05_peak_33618	chr5	30949506	30950768	Abhd1
2_wt.q.05_peak_32869	chr4	141147164	141147816	Fbxo42
2_wt.q.05_peak_558	chr1	37996151	37998208	Txndc9
2_wt.q.05_peak_46207	chrX	134585659	134586669	Rpl36a
2_wt.q.05_peak_26678	chr2	127788346	127789464	Nphp1
2_wt.q.05_peak_19408	chr17	5440046	5440827	Tmem242
2_wt.q.05_peak_45064	chr9	97110501	97111395	Slc25a36
2_wt.q.05_peak_38744	chr7	27674673	27675148	C030039L03Rik
2_wt.q.05_peak_1005	chr1	58504715	58505583	Orc2
2_wt.q.05_peak_32484	chr4	127986958	127988245	Csmd2
2_wt.q.05_peak_5246	chr10	93452678	93453787	Lta4h
2_wt.q.05_peak_15881	chr15	33687622	33688876	Tspyl5
2_wt.q.05_peak_12783	chr13	93499948	93500798	Jmy
2_wt.q.05_peak_42130	chr8	71487168	71489218	Gtpbp3
2_wt.q.05_peak_38428	chr6	149099713	149102227	Dennd5b
2_wt.q.05_peak_40061	chr7	100606998	100607461	Rab6a
2_wt.q.05_peak_43906	chr9	43103785	43107916	Arhgef12
2_wt.q.05_peak_26221	chr2	106523002	106523735	Gm14015
2_wt.q.05_peak_21304	chr18	23309920	23310390	Dtna
2_wt.q.05_peak_35608	chr5	140830353	140831027	Gna12
2_wt.q.05_peak_17971	chr16	20733358	20734011	Chrd
2_wt.q.05_peak_40664	chr7	127513155	127514024	1700008J07Rik
2_wt.q.05_peak_2126	chr1	133908245	133909044	Optc
2_wt.q.05_peak_24271	chr2	13270940	13272147	Rsu1
2_wt.q.05_peak_27894	chr3	14610514	14612186	1810022K09Rik
2_wt.q.05_peak_32190	chr4	114405344	114406159	Trabd2b
2_wt.q.05_peak_36437	chr6	37441484	37443206	Creb3l2
2_wt.q.05_peak_26592	chr2	121955823	121957007	Mageb3
2_wt.q.05_peak_26210	chr2	105016656	105017332	Eif3m
2_wt.q.05_peak_8840	chr11	121433600	121436103	Fn3k
2_wt.q.05_peak_21655	chr18	37955613	37956673	Rell2
2_wt.q.05_peak_5260	chr10	94198477	94199396	Ndufa12
2_wt.q.05_peak_38993	chr7	44996922	44998531	Irf3
2_wt.q.05_peak_802	chr1	51332789	51334835	9330175M20Rik
2_wt.q.05_peak_22569	chr18	77938068	77938763	Epg5
2_wt.q.05_peak_30597	chr4	7560056	7560440	8430436N08Rik
2_wt.q.05_peak_11284	chr13	17805117	17805956	Cdk13
2_wt.q.05_peak_30394	chr3	152980955	152982190	St6galnac5
2_wt.q.05_peak_31134	chr4	45083683	45084106	Fbxo10
2_wt.q.05_peak_40176	chr7	109083062	109083627	Ric3
2_wt.q.05_peak_39043	chr7	45783160	45783789	Lmtk3
2_wt.q.05_peak_31345	chr4	58943314	58944263	Zkscan16
2_wt.q.05_peak_37899	chr6	118454451	118455627	Zfp248
2_wt.q.05_peak_7113	chr11	58322504	58323331	Zfp672
2_wt.q.05_peak_1585	chr1	90603080	90603740	Cops8
2_wt.q.05_peak_33439	chr5	21700043	21702029	Napepld
2_wt.q.05_peak_719	chr1	44102168	44102763	Tex30
2_wt.q.05_peak_44788	chr9	78481927	78482382	Eef1a1
2_wt.q.05_peak_16750	chr15	75841537	75841855	Zc3h3
2_wt.q.05_peak_39122	chr7	49975152	49975748	Nell1
2_wt.q.05_peak_25214	chr2	60210408	60211280	2022-03-07
2_wt.q.05_peak_44357	chr9	59655716	59658778	Pkm
2_wt.q.05_peak_8366	chr11	103954240	103954534	Nsf
2_wt.q.05_peak_2053	chr1	131827323	131828457	Slc41a1
2_wt.q.05_peak_37130	chr6	86683794	86684941	Snrnp27
2_wt.q.05_peak_31266	chr4	53439525	53440354	Slc44a1
2_wt.q.05_peak_19937	chr17	33684492	33685752	Hnrnpm
2_wt.q.05_peak_42597	chr8	95702357	95705290	Ndrg4
2_wt.q.05_peak_14547	chr14	67715683	67716810	Kctd9
2_wt.q.05_peak_32621	chr4	132534785	132535870	Atpif1
2_wt.q.05_peak_29888	chr3	126595546	126596848	Camk2d
2_wt.q.05_peak_10406	chr12	87146598	87148328	Gstz1
2_wt.q.05_peak_242	chr1	21958787	21963674	Kcnq5
2_wt.q.05_peak_35079	chr5	120648945	120649342	Rasal1
2_wt.q.05_peak_22858	chr19	6240919	6241759	Atg2a
2_wt.q.05_peak_29255	chr3	95133494	95133996	Scnm1
2_wt.q.05_peak_4576	chr10	63243978	63245141	Herc4
2_wt.q.05_peak_30615	chr4	9268046	9268602	Clvs1
2_wt.q.05_peak_6131	chr11	5098817	5099977	Rhbdd3
2_wt.q.05_peak_33084	chr4	155086407	155087103	Morn1
2_wt.q.05_peak_46121	chrX	98937517	98937990	Yipf6
2_wt.q.05_peak_34381	chr5	76183242	76183813	Tmem165
2_wt.q.05_peak_37731	chr6	113306413	113307148	Brpf1
2_wt.q.05_peak_29404	chr3	100161970	100162928	Gdap2
2_wt.q.05_peak_24758	chr2	35557735	35558357	Dab2ip
2_wt.q.05_peak_38992	chr7	44986453	44987240	Gm15545
2_wt.q.05_peak_26667	chr2	127207965	127208842	Snrnp200
2_wt.q.05_peak_36850	chr6	65042126	65043032	Smarcad1
2_wt.q.05_peak_23422	chr19	36555076	36556167	Hectd2
2_wt.q.05_peak_38222	chr6	136807770	136809514	H2afj
2_wt.q.05_peak_5223	chr10	93160192	93160527	Cdk17
2_wt.q.05_peak_11523	chr13	28952028	28954289	Sox4
2_wt.q.05_peak_2171	chr1	135429660	135431028	Ipo9
2_wt.q.05_peak_25726	chr2	80314055	80315647	Dnajc10
2_wt.q.05_peak_20146	chr17	46673591	46674354	Rrp36
2_wt.q.05_peak_38833	chr7	30321147	30323047	Sdhaf1
2_wt.q.05_peak_37167	chr6	87671746	87672200	Aplf
2_wt.q.05_peak_27300	chr2	153240482	153242099	Plagl2
2_wt.q.05_peak_32612	chr4	132329653	132329919	Trnau1ap
2_wt.q.05_peak_35530	chr5	136953244	136953871	Fis1
2_wt.q.05_peak_20323	chr17	57769172	57770183	Cntnap5c
2_wt.q.05_peak_43426	chr9	24501720	24502910	Dpy19l1
2_wt.q.05_peak_7027	chr11	54437406	54439939	Fnip1
2_wt.q.05_peak_12111	chr13	58806622	58808557	Ntrk2
2_wt.q.05_peak_19976	chr17	34951266	34951671	Snord52
2_wt.q.05_peak_33212	chr5	9160515	9161595	Dmtf1
2_wt.q.05_peak_30687	chr4	13784602	13786671	Runx1t1
2_wt.q.05_peak_30826	chr4	24849697	24851661	Klhl32
2_wt.q.05_peak_3292	chr1	182282887	182283439	Degs1
2_wt.q.05_peak_31104	chr4	43441790	43442989	Tesk1
2_wt.q.05_peak_24481	chr2	25607502	25608325	Rabl6
2_wt.q.05_peak_26775	chr2	131352723	131353421	Rnf24
2_wt.q.05_peak_45607	chr9	114731361	114732381	Cmtm6
2_wt.q.05_peak_44345	chr9	59486783	59487503	Arih1
2_wt.q.05_peak_4269	chr10	41449856	41450960	Zbtb24
2_wt.q.05_peak_43234	chr9	9238152	9238805	Arhgap42
2_wt.q.05_peak_167	chr1	16092026	16092673	4930444P10Rik
2_wt.q.05_peak_18214	chr16	31948736	31949271	Ncbp2
2_wt.q.05_peak_45797	chr9	124422628	124423051	4930526I15Rik
2_wt.q.05_peak_2843	chr1	166002491	166003689	Pou2f1
2_wt.q.05_peak_19952	chr17	33940135	33940882	Pfdn6
2_wt.q.05_peak_36793	chr6	57824703	57825512	Vopp1
2_wt.q.05_peak_35080	chr5	120649719	120650005	Rasal1
2_wt.q.05_peak_45743	chr9	122117963	122118376	Snrk
2_wt.q.05_peak_13897	chr14	31000945	31001608	Glt8d1
2_wt.q.05_peak_2783	chr1	164275411	164276618	Ccdc181
2_wt.q.05_peak_45092	chr9	99242344	99243650	Cep70
2_wt.q.05_peak_37729	chr6	113237552	113238098	Mtmr14
2_wt.q.05_peak_42067	chr8	69774136	69775236	Zfp866
2_wt.q.05_peak_33629	chr5	31192480	31193558	Eif2b4
2_wt.q.05_peak_43934	chr9	44343335	44344229	Hmbs
2_wt.q.05_peak_31387	chr4	64046884	64047457	Tnc
2_wt.q.05_peak_42360	chr8	84772771	84774085	Nfix
2_wt.q.05_peak_43029	chr8	123373049	123373958	Tcf25
2_wt.q.05_peak_41859	chr8	58909558	58913200	Galntl6
2_wt.q.05_peak_10219	chr12	81594979	81595833	Med6
2_wt.q.05_peak_23089	chr19	17393551	17394959	Rfk
2_wt.q.05_peak_42590	chr8	95633251	95634272	Gins3
2_wt.q.05_peak_42392	chr8	85060128	85060606	A230103J11Rik
2_wt.q.05_peak_12223	chr13	65112324	65113470	Hiatl1
2_wt.q.05_peak_23573	chr19	44068576	44069397	Erlin1
2_wt.q.05_peak_35782	chr5	149184486	149185257	Uspl1
2_wt.q.05_peak_34563	chr5	92042178	92043696	Cdkl2
2_wt.q.05_peak_9774	chr12	59060680	59061720	Trappc6b
2_wt.q.05_peak_38429	chr6	149188086	149189076	Amn1
2_wt.q.05_peak_25805	chr2	84715146	84716927	Zdhhc5
2_wt.q.05_peak_43000	chr8	122676948	122677569	Cbfa2t3
2_wt.q.05_peak_14213	chr14	55509887	55510595	Cpne6
2_wt.q.05_peak_37674	chr6	110645245	110646415	Grm7
2_wt.q.05_peak_32043	chr4	104366835	104370176	Dab1
2_wt.q.05_peak_29393	chr3	98381991	98382986	Zfp697
2_wt.q.05_peak_4122	chr10	32890239	32890969	Nkain2
2_wt.q.05_peak_13400	chr13	119756004	119756886	Nim1k
2_wt.q.05_peak_42265	chr8	81015156	81015600	Usp38
2_wt.q.05_peak_5781	chr10	116017846	116019755	Ptprr
2_wt.q.05_peak_35556	chr5	138160838	138161495	Cops6
2_wt.q.05_peak_20808	chr17	84626150	84627177	Dync2li1
2_wt.q.05_peak_22491	chr18	74065492	74066160	Mapk4
2_wt.q.05_peak_39610	chr7	81454943	81456078	Cpeb1
2_wt.q.05_peak_26449	chr2	117249243	117249934	Fam98b
2_wt.q.05_peak_40885	chr7	141429089	141429783	Cend1
2_wt.q.05_peak_40651	chr7	127208766	127209616	Tbc1d10b
2_wt.q.05_peak_40496	chr7	122133045	122133458	Dctn5
2_wt.q.05_peak_4737	chr10	70440347	70441095	Fam13c
2_wt.q.05_peak_26	chr1	5082521	5084062	Atp6v1h
2_wt.q.05_peak_6169	chr11	6267374	6268617	Ddx56
2_wt.q.05_peak_23916	chr19	58942918	58943586	Eno4
2_wt.q.05_peak_1216	chr1	70725255	70726880	Vwc2l
2_wt.q.05_peak_35211	chr5	123720900	123721584	Zcchc8
2_wt.q.05_peak_27379	chr2	156196171	156197523	Phf20
2_wt.q.05_peak_22852	chr19	6060309	6061841	Znhit2
2_wt.q.05_peak_35651	chr5	143234751	143235514	Zfp12
2_wt.q.05_peak_11457	chr13	23761524	23763876	Hist1h3a
2_wt.q.05_peak_1601	chr1	91249619	91250168	Ube2f
2_wt.q.05_peak_28358	chr3	50443702	50444338	Slc7a11
2_wt.q.05_peak_23785	chr19	53390830	53391191	Smndc1
2_wt.q.05_peak_9734	chr12	55398193	55399240	Psma6
2_wt.q.05_peak_45308	chr9	107533179	107534274	Tmem115
2_wt.q.05_peak_41605	chr8	41373642	41375653	Asah1
2_wt.q.05_peak_33140	chr5	3802869	3805076	Krit1
2_wt.q.05_peak_8060	chr11	96788527	96789305	Cbx1
2_wt.q.05_peak_4628	chr10	67095941	67096299	Reep3
2_wt.q.05_peak_24024	chr2	5950066	5951379	Upf2
2_wt.q.05_peak_38639	chr7	19344497	19345773	Ercc1
2_wt.q.05_peak_41064	chr8	11550509	11551204	Cars2
2_wt.q.05_peak_27287	chr2	152398326	152398856	Sox12
2_wt.q.05_peak_7903	chr11	87592125	87592415	Mtmr4
2_wt.q.05_peak_34333	chr5	73646744	73647158	Sgcb
2_wt.q.05_peak_34011	chr5	52783122	52783700	Zcchc4
2_wt.q.05_peak_12145	chr13	59555333	59556719	Agtpbp1
2_wt.q.05_peak_29332	chr3	96595603	96597665	Ankrd34a
2_wt.q.05_peak_40948	chr8	4165551	4166437	Evi5l
2_wt.q.05_peak_46358	chrX	162829021	162830190	Txlng
2_wt.q.05_peak_32847	chr4	139622175	139622567	Aldh4a1
2_wt.q.05_peak_11554	chr13	30973354	30974057	Exoc2
2_wt.q.05_peak_16165	chr15	44618623	44618999	Ebag9
2_wt.q.05_peak_34958	chr5	114130813	114131398	Ung
2_wt.q.05_peak_41317	chr8	25016487	25016909	Adam9
2_wt.q.05_peak_33213	chr5	9161914	9162411	Dmtf1
2_wt.q.05_peak_29130	chr3	88552550	88553660	Lamtor2
2_wt.q.05_peak_5115	chr10	89872048	89875026	Anks1b
2_wt.q.05_peak_30628	chr4	9770114	9771232	4930412C18Rik
2_wt.q.05_peak_18221	chr16	32245772	32246545	Fbxo45
2_wt.q.05_peak_17899	chr16	17832950	17833239	B830017H08Rik
2_wt.q.05_peak_12685	chr13	91806954	91807928	Zcchc9
2_wt.q.05_peak_20654	chr17	75551307	75552756	Fam98a
2_wt.q.05_peak_23943	chr19	60874137	60874885	Prdx3
2_wt.q.05_peak_40706	chr7	128744900	128745330	Sec23ip
2_wt.q.05_peak_32761	chr4	137594379	137595318	Usp48
2_wt.q.05_peak_8878	chr12	4081921	4083636	Dnajc27
2_wt.q.05_peak_7592	chr11	77607628	77608584	Taok1
2_wt.q.05_peak_43450	chr9	25250453	25252511	2022-09-07
2_wt.q.05_peak_18040	chr16	23224910	23225632	St6gal1
2_wt.q.05_peak_9363	chr12	32061242	32061834	Prkar2b
2_wt.q.05_peak_33330	chr5	19225714	19226727	4921504A21Rik
2_wt.q.05_peak_37836	chr6	115601907	115602595	Mkrn2
2_wt.q.05_peak_7993	chr11	93884350	93887745	Mbtd1
2_wt.q.05_peak_13415	chr14	8098224	8099337	Pxk
2_wt.q.05_peak_4544	chr10	61679780	61680099	1700022H01Rik
2_wt.q.05_peak_16960	chr15	81190896	81191665	4930483J18Rik
2_wt.q.05_peak_35248	chr5	124354617	124355875	Cdk2ap1
2_wt.q.05_peak_25858	chr2	90846597	90848282	Mtch2
2_wt.q.05_peak_20442	chr17	66110884	66112214	Wash1
2_wt.q.05_peak_1665	chr1	95666038	95668442	St8sia4
2_wt.q.05_peak_16760	chr15	76326885	76327922	Exosc4
2_wt.q.05_peak_40880	chr7	141172143	141173072	Rnh1
2_wt.q.05_peak_38946	chr7	41393093	41393873	AI987944
2_wt.q.05_peak_11903	chr13	48512930	48513936	Zfp169
2_wt.q.05_peak_27698	chr2	172999751	173000374	Rae1
2_wt.q.05_peak_140	chr1	13370785	13372784	Ncoa2
2_wt.q.05_peak_22973	chr19	10181515	10183716	Fads1
2_wt.q.05_peak_7209	chr11	61930467	61930770	Akap10
2_wt.q.05_peak_29568	chr3	108017611	108018013	Gstm1
2_wt.q.05_peak_43653	chr9	32220658	32228542	Arhgap32
2_wt.q.05_peak_20113	chr17	45432620	45434440	Cdc5l
2_wt.q.05_peak_4817	chr10	75763865	75765298	Cabin1
2_wt.q.05_peak_21079	chr18	6764599	6765694	Rab18
2_wt.q.05_peak_16943	chr15	80797917	80800735	Tnrc6b
2_wt.q.05_peak_10836	chr12	108836044	108836396	Slc25a29
2_wt.q.05_peak_27804	chr3	5217703	5219874	Zfhx4
2_wt.q.05_peak_27495	chr2	161108049	161110644	Chd6
2_wt.q.05_peak_40879	chr7	141168444	141169379	Rnh1
2_wt.q.05_peak_27079	chr2	142900379	142902041	Kif16b
2_wt.q.05_peak_19975	chr17	34931390	34931866	Neu1
2_wt.q.05_peak_15260	chr14	118924250	118925510	Dzip1
2_wt.q.05_peak_42809	chr8	109706643	109707055	Zfp821
2_wt.q.05_peak_32742	chr4	136052959	136053341	Rpl11
2_wt.q.05_peak_10608	chr12	98919816	98921180	Ttc8
2_wt.q.05_peak_39290	chr7	64391711	64392849	Mphosph10
2_wt.q.05_peak_26660	chr2	126932115	126933524	Sppl2a
2_wt.q.05_peak_45633	chr9	118149691	118150625	Cmc1
2_wt.q.05_peak_27479	chr2	160645624	160646071	Top1
2_wt.q.05_peak_7118	chr11	58903403	58904956	Zfp39
2_wt.q.05_peak_16772	chr15	76639784	76640706	Tonsl
2_wt.q.05_peak_26685	chr2	128817534	128819162	Tmem87b
2_wt.q.05_peak_6114	chr11	4849184	4850065	Nf2
2_wt.q.05_peak_36764	chr6	56714343	56716504	Avl9
2_wt.q.05_peak_4672	chr10	68276282	68280427	Arid5b
2_wt.q.05_peak_46178	chrX	109095125	109095404	Sh3bgrl
2_wt.q.05_peak_27363	chr2	155691103	155691730	Trpc4ap
2_wt.q.05_peak_36949	chr6	72597724	72599413	Retsat
2_wt.q.05_peak_37756	chr6	113623168	113623732	Vhl
2_wt.q.05_peak_6015	chr10	128081852	128083897	Atp5b
2_wt.q.05_peak_38206	chr6	136173223	136173616	Grin2b
2_wt.q.05_peak_27648	chr2	167689779	167691180	A530013C23Rik
2_wt.q.05_peak_9690	chr12	52603007	52603542	1700031P21Rik
2_wt.q.05_peak_12465	chr13	81782745	81785009	Cetn3
2_wt.q.05_peak_6004	chr10	127621252	127621734	Lrp1
2_wt.q.05_peak_22304	chr18	67448849	67449808	Afg3l2
2_wt.q.05_peak_31361	chr4	59580379	59582317	Hsdl2
2_wt.q.05_peak_8113	chr11	97781437	97782359	Snora21
2_wt.q.05_peak_30738	chr4	16163108	16163594	Ripk2
2_wt.q.05_peak_42846	chr8	111145936	111146249	9430091E24Rik
2_wt.q.05_peak_9943	chr12	70307053	70308488	Mir466o
2_wt.q.05_peak_485	chr1	34843116	34843602	Fam168b
2_wt.q.05_peak_39981	chr7	97841229	97844348	Pak1
2_wt.q.05_peak_7459	chr11	72795546	72796069	Cyb5d2
2_wt.q.05_peak_10324	chr12	84315837	84317780	Zfp410
2_wt.q.05_peak_32126	chr4	108618688	108620810	Cc2d1b
2_wt.q.05_peak_5974	chr10	127069300	127071496	A730063M14Rik
2_wt.q.05_peak_35143	chr5	122421927	122422401	Anapc7
2_wt.q.05_peak_46097	chrX	94212443	94212910	Eif2s3x
2_wt.q.05_peak_2957	chr1	170215642	170215964	Uhmk1
2_wt.q.05_peak_40815	chr7	137410247	137411335	9430038I01Rik
2_wt.q.05_peak_39041	chr7	45714309	45714781	Sphk2
2_wt.q.05_peak_13760	chr14	25841761	25842771	Anxa11
2_wt.q.05_peak_18064	chr16	25059038	25059854	A230028O05Rik
2_wt.q.05_peak_21534	chr18	34860859	34861121	Egr1
2_wt.q.05_peak_29114	chr3	88324814	88325448	Glmp
2_wt.q.05_peak_33514	chr5	24423321	24424096	Cdk5
2_wt.q.05_peak_30286	chr3	145117917	145118781	Odf2l
2_wt.q.05_peak_20029	chr17	36981157	36981786	2410137M14Rik
2_wt.q.05_peak_38303	chr6	142506115	142508623	Ldhb
2_wt.q.05_peak_4194	chr10	39732211	39733406	Rev3l
2_wt.q.05_peak_12241	chr13	67552866	67553258	Zfp748
2_wt.q.05_peak_24240	chr2	11776490	11778828	Ankrd16
2_wt.q.05_peak_5819	chr10	117710852	117711365	Mdm2
2_wt.q.05_peak_143	chr1	13659977	13660790	Lactb2
2_wt.q.05_peak_46192	chrX	122397590	122398180	Nap1l3
2_wt.q.05_peak_38581	chr7	16614963	16615977	Arhgap35
2_wt.q.05_peak_25917	chr2	91730778	91731386	Ambra1
2_wt.q.05_peak_1777	chr1	105989451	105990780	Zcchc2
2_wt.q.05_peak_23011	chr19	11911039	11912333	Patl1
2_wt.q.05_peak_42092	chr8	70477056	70477358	Klhl26
2_wt.q.05_peak_25555	chr2	73595927	73597302	Chn1os3
2_wt.q.05_peak_34036	chr5	53588539	53591715	Rbpj
2_wt.q.05_peak_32936	chr4	148591073	148592600	Srm
2_wt.q.05_peak_28285	chr3	41082009	41082531	Pgrmc2
2_wt.q.05_peak_3397	chr1	190927702	190929424	Angel2
2_wt.q.05_peak_19940	chr17	33759502	33760920	Rab11b
2_wt.q.05_peak_2865	chr1	166379542	166380104	Tada1
2_wt.q.05_peak_19134	chr16	87454566	87454867	Usp16
2_wt.q.05_peak_26485	chr2	119112131	119112982	Rad51
2_wt.q.05_peak_33106	chr4	155408769	155409677	Cfap74
2_wt.q.05_peak_45902	chrX	23692267	23693836	Wdr44
2_wt.q.05_peak_31363	chr4	59805306	59805768	Snx30
2_wt.q.05_peak_14096	chr14	47648650	47649213	Ktn1
2_wt.q.05_peak_11335	chr13	20090052	20090506	Elmo1
2_wt.q.05_peak_8092	chr11	97450235	97450580	Arhgap23
2_wt.q.05_peak_38669	chr7	24529918	24531760	Irgq
2_wt.q.05_peak_9837	chr12	65072114	65076665	Fkbp3
2_wt.q.05_peak_41483	chr8	35494691	35496075	Eri1
2_wt.q.05_peak_20709	chr17	80224120	80224858	Gemin6
2_wt.q.05_peak_37974	chr6	121130312	121131310	Mical3
2_wt.q.05_peak_12805	chr13	94788619	94789141	Tbca
2_wt.q.05_peak_36462	chr6	38551374	38552376	Luc7l2
2_wt.q.05_peak_11680	chr13	41604973	41605889	Tmem170b
2_wt.q.05_peak_16991	chr15	81960374	81961480	Pmm1
2_wt.q.05_peak_37097	chr6	85961221	85962431	Dusp11
2_wt.q.05_peak_45310	chr9	107554915	107555407	Rassf1
2_wt.q.05_peak_1038	chr1	60342788	60344173	Cyp20a1
2_wt.q.05_peak_38957	chr7	43606641	43607105	Zfp819
2_wt.q.05_peak_45419	chr9	110655966	110657611	Ccdc12
2_wt.q.05_peak_3061	chr1	172328108	172329292	Kcnj9
2_wt.q.05_peak_4326	chr10	43220493	43222102	Pdss2
2_wt.q.05_peak_11104	chr13	8885563	8886754	Idi1
2_wt.q.05_peak_1263	chr1	74505223	74507035	Rqcd1
2_wt.q.05_peak_9514	chr12	41486772	41487125	Lrrn3
2_wt.q.05_peak_43031	chr8	123411127	123413706	Tubb3
2_wt.q.05_peak_44353	chr9	59588427	59590194	Celf6
2_wt.q.05_peak_5042	chr10	84576259	84577066	Tcp11l2
2_wt.q.05_peak_29588	chr3	108256202	108257931	Psma5
2_wt.q.05_peak_14049	chr14	45219110	45221919	Gpr137c
2_wt.q.05_peak_37040	chr6	83165286	83166300	Dctn1
2_wt.q.05_peak_1103	chr1	63964159	63965904	Gm13749
2_wt.q.05_peak_7107	chr11	58008282	58008722	Larp1
2_wt.q.05_peak_38640	chr7	19359470	19361881	Ppp1r13l
2_wt.q.05_peak_23066	chr19	16132886	16134116	Gnaq
2_wt.q.05_peak_40868	chr7	140855292	140856132	Bet1l
2_wt.q.05_peak_10589	chr12	98574986	98575303	Kcnk10
2_wt.q.05_peak_22531	chr18	76943313	76944912	Hdhd2
2_wt.q.05_peak_12353	chr13	74640223	74640757	Erap1
2_wt.q.05_peak_36920	chr6	71830844	71832501	Immt
2_wt.q.05_peak_27342	chr2	154892227	154893548	Eif2s2
2_wt.q.05_peak_27828	chr3	8508808	8510570	Stmn2
2_wt.q.05_peak_10169	chr12	79295767	79297659	Zfyve26
2_wt.q.05_peak_31042	chr4	40757480	40758215	Smu1
2_wt.q.05_peak_24362	chr2	19553481	19554842	4921504E06Rik
2_wt.q.05_peak_4964	chr10	81182943	81183862	Dapk3
2_wt.q.05_peak_41780	chr8	54600141	54601409	Spata4
2_wt.q.05_peak_20708	chr17	80206766	80208238	Srsf7
2_wt.q.05_peak_5258	chr10	94147423	94148244	Nr2c1
2_wt.q.05_peak_2744	chr1	161251197	161251707	Prdx6
2_wt.q.05_peak_16523	chr15	66576858	66578911	Phf20l1
2_wt.q.05_peak_366	chr1	25825875	25831754	Adgrb3
2_wt.q.05_peak_2516	chr1	154724273	154726013	Cacna1e
2_wt.q.05_peak_11239	chr13	14612796	14613706	Psma2
2_wt.q.05_peak_23577	chr19	44106894	44108684	Chuk
2_wt.q.05_peak_10310	chr12	83919185	83923785	Numb
2_wt.q.05_peak_20148	chr17	46680613	46681432	Mea1
2_wt.q.05_peak_30360	chr3	152191729	152194146	Dnajb4
2_wt.q.05_peak_42263	chr8	80739677	80740301	Smarca5
2_wt.q.05_peak_35892	chr6	8258392	8260612	Umad1
2_wt.q.05_peak_38627	chr7	19282016	19282871	Rtn2
2_wt.q.05_peak_19698	chr17	25015893	25016762	Ift140
2_wt.q.05_peak_7998	chr11	93996733	93997132	Spag9
2_wt.q.05_peak_44549	chr9	66834440	66835396	Aph1c
2_wt.q.05_peak_27319	chr2	154435687	154437606	Cbfa2t2
2_wt.q.05_peak_8258	chr11	101424071	101426299	Rundc1
2_wt.q.05_peak_23502	chr19	40894748	40895529	Zfp518a
2_wt.q.05_peak_3011	chr1	171149907	171151252	Sdhc
2_wt.q.05_peak_33113	chr4	155624168	155624686	Gm16023
2_wt.q.05_peak_26825	chr2	132247059	132248322	Tmem230
2_wt.q.05_peak_38979	chr7	44748409	44749150	Vrk3
2_wt.q.05_peak_17940	chr16	20097266	20098457	Klhl24
2_wt.q.05_peak_27559	chr2	164878411	164879077	Pcif1
2_wt.q.05_peak_16121	chr15	41829908	41831838	Oxr1
2_wt.q.05_peak_44785	chr9	78191558	78192281	Gsta4
2_wt.q.05_peak_44261	chr9	57075041	57077442	Sin3a
2_wt.q.05_peak_21645	chr18	37818720	37820753	Pcdhgc5
2_wt.q.05_peak_5434	chr10	100588628	100589822	4930430F08Rik
2_wt.q.05_peak_42230	chr8	77518198	77518998	Arhgap10
2_wt.q.05_peak_33040	chr4	152008595	152009610	Klhl21
2_wt.q.05_peak_45162	chr9	103365729	103366517	Cdv3
2_wt.q.05_peak_23637	chr19	45998290	45999088	9130011E15Rik
2_wt.q.05_peak_42297	chr8	83331908	83332987	Elmod2
2_wt.q.05_peak_13388	chr13	119462443	119463317	4833420G17Rik
2_wt.q.05_peak_45976	chrX	57392030	57393519	Rbmx
2_wt.q.05_peak_7467	chr11	73018693	73020022	Camkk1
2_wt.q.05_peak_35256	chr5	124439344	124441306	Setd8
2_wt.q.05_peak_12226	chr13	66904542	66905987	Uqcrb
2_wt.q.05_peak_35392	chr5	130144274	130145213	Kctd7
2_wt.q.05_peak_45468	chr9	112118483	112119158	Mir128-2
2_wt.q.05_peak_31928	chr4	98922904	98923930	Usp1
2_wt.q.05_peak_1501	chr1	86111720	86112423	Htr2b
2_wt.q.05_peak_36911	chr6	71631123	71633774	Kdm3a
2_wt.q.05_peak_45003	chr9	94668593	94670783	Slc9a9
2_wt.q.05_peak_6188	chr11	6605413	6606318	Nacad
2_wt.q.05_peak_12319	chr13	70637839	70638466	Ice1
2_wt.q.05_peak_2840	chr1	165763425	165764003	Creg1
2_wt.q.05_peak_26225	chr2	106694003	106695295	Mpped2
2_wt.q.05_peak_46167	chrX	105391327	105392124	5330434G04Rik
2_wt.q.05_peak_19888	chr17	30611800	30612720	Glo1
2_wt.q.05_peak_32553	chr4	129672854	129673582	Kpna6
2_wt.q.05_peak_24443	chr2	23067667	23070129	Acbd5
2_wt.q.05_peak_4843	chr10	76468140	76469236	Mcm3ap
2_wt.q.05_peak_8246	chr11	101082326	101082963	Coasy
2_wt.q.05_peak_35149	chr5	122502025	122503466	Atp2a2
2_wt.q.05_peak_18546	chr16	44138710	44139671	Atp6v1a
2_wt.q.05_peak_44751	chr9	75682573	75684970	Scg3
2_wt.q.05_peak_17784	chr16	13109262	13109805	Ercc4
2_wt.q.05_peak_38626	chr7	19227180	19229478	Opa3
2_wt.q.05_peak_1359	chr1	78310371	78311454	Sgpp2
2_wt.q.05_peak_39159	chr7	55793578	55794761	Tubgcp5
2_wt.q.05_peak_22173	chr18	61785976	61786385	Afap1l1
2_wt.q.05_peak_38757	chr7	28178645	28179916	Dyrk1b
2_wt.q.05_peak_3209	chr1	178405154	178405518	Efcab2
2_wt.q.05_peak_6564	chr11	30954371	30955351	Asb3
2_wt.q.05_peak_13387	chr13	119429146	119430442	Paip1
2_wt.q.05_peak_8662	chr11	115536616	115537342	Sumo2
2_wt.q.05_peak_2012	chr1	130715113	130717295	Pfkfb2
2_wt.q.05_peak_28639	chr3	65658341	65658866	Mir8120
2_wt.q.05_peak_19673	chr17	24478806	24479353	Mlst8
2_wt.q.05_peak_15937	chr15	36608203	36608787	Pabpc1
2_wt.q.05_peak_19136	chr16	87495218	87496520	Cct8
2_wt.q.05_peak_36222	chr6	30401224	30401989	Klhdc10
2_wt.q.05_peak_7227	chr11	62602852	62603851	Snord49a
2_wt.q.05_peak_35168	chr5	122850232	122850914	Rnf34
2_wt.q.05_peak_26121	chr2	102400735	102401512	Trim44
2_wt.q.05_peak_42744	chr8	106058490	106060880	Nfatc3
2_wt.q.05_peak_12073	chr13	56894843	56895119	Trpc7
2_wt.q.05_peak_22327	chr18	67800066	67800713	Cep192
2_wt.q.05_peak_40124	chr7	102222665	102223529	Pgap2
2_wt.q.05_peak_22497	chr18	74216203	74217066	Cxxc1
2_wt.q.05_peak_9784	chr12	59216629	59220442	Fbxo33
2_wt.q.05_peak_32137	chr4	109117755	109118979	Osbpl9
2_wt.q.05_peak_29158	chr3	89177063	89178753	Scamp3
2_wt.q.05_peak_4559	chr10	62650239	62651931	Ddx50
2_wt.q.05_peak_28274	chr3	40744233	40747411	Hspa4l
2_wt.q.05_peak_17013	chr15	83149454	83150254	Rnu12
2_wt.q.05_peak_11929	chr13	49681511	49682831	Iars
2_wt.q.05_peak_36061	chr6	18848065	18849379	Lsm8
2_wt.q.05_peak_13293	chr13	112926688	112928624	Dhx29
2_wt.q.05_peak_9148	chr12	17545102	17545773	Odc1
2_wt.q.05_peak_15471	chr15	8168985	8169263	2410089E03Rik
2_wt.q.05_peak_9336	chr12	31654177	31655126	Dus4l
2_wt.q.05_peak_14902	chr14	88470297	88470734	Pcdh20
2_wt.q.05_peak_31108	chr4	43561531	43563947	Creb3
2_wt.q.05_peak_25375	chr2	66440490	66441020	Scn1a
2_wt.q.05_peak_25650	chr2	77814546	77817391	Zfp385b
2_wt.q.05_peak_23019	chr19	12036504	12037480	Olfr1423
2_wt.q.05_peak_35812	chr5	150259002	150262650	Fry
2_wt.q.05_peak_507	chr1	36470972	36471368	Cnnm4
2_wt.q.05_peak_46231	chrX	140542954	140543572	Tsc22d3
2_wt.q.05_peak_12658	chr13	90922917	90923451	Rps23
2_wt.q.05_peak_9107	chr12	16810394	16811635	E2f6
2_wt.q.05_peak_16143	chr15	43169893	43171134	Rspo2
2_wt.q.05_peak_11946	chr13	51651786	51652190	Secisbp2
2_wt.q.05_peak_41870	chr8	60505821	60506314	Aadat
2_wt.q.05_peak_11567	chr13	33935323	33935616	1110046J04Rik
2_wt.q.05_peak_4244	chr10	40879770	40886664	Cdc40
2_wt.q.05_peak_2705	chr1	160211413	160214039	Cacybp
2_wt.q.05_peak_4963	chr10	81176781	81177415	Eef2
2_wt.q.05_peak_31256	chr4	52438543	52439232	Smc2os
2_wt.q.05_peak_10718	chr12	101975534	101976669	Cpsf2
2_wt.q.05_peak_29606	chr3	108443999	108445247	Sars
2_wt.q.05_peak_32232	chr4	116685572	116686373	AV051173
2_wt.q.05_peak_44210	chr9	54734091	54734468	Wdr61
2_wt.q.05_peak_13411	chr14	8002896	8004506	Abhd6
2_wt.q.05_peak_458	chr1	33906624	33907538	Bend6
2_wt.q.05_peak_39353	chr7	66078972	66080746	Vimp
2_wt.q.05_peak_33114	chr4	155668993	155670265	Mib2
2_wt.q.05_peak_32305	chr4	120569751	120570600	Ctps
2_wt.q.05_peak_38473	chr7	4149652	4150313	Leng9
2_wt.q.05_peak_25619	chr2	76648099	76648462	Prkra
2_wt.q.05_peak_27805	chr3	5221630	5221974	2700069I18Rik
2_wt.q.05_peak_31101	chr4	43380897	43381911	Rusc2
2_wt.q.05_peak_35112	chr5	121451457	121452369	Erp29
2_wt.q.05_peak_42083	chr8	70234201	70234468	Armc6
2_wt.q.05_peak_18719	chr16	56717472	56718087	Tfg
2_wt.q.05_peak_18035	chr16	22857026	22857764	Tbccd1
2_wt.q.05_peak_31379	chr4	62501722	62502269	Hdhd3
2_wt.q.05_peak_42882	chr8	112010746	112012412	Terf2ip
2_wt.q.05_peak_35673	chr5	144014274	144015189	Ccz1
2_wt.q.05_peak_45225	chr9	105495296	105496189	Atp2c1
2_wt.q.05_peak_2582	chr1	156937917	156938924	Ralgps2
2_wt.q.05_peak_6505	chr11	29246027	29247720	Cfap36
2_wt.q.05_peak_33312	chr5	17574618	17575075	Sema3c
2_wt.q.05_peak_24784	chr2	37430637	37432047	Zbtb6
2_wt.q.05_peak_34552	chr5	90931799	90932518	Mthfd2l
2_wt.q.05_peak_9373	chr12	32952827	32955973	Sypl
2_wt.q.05_peak_40595	chr7	125491094	125491797	Nsmce1
2_wt.q.05_peak_22947	chr19	8837464	8838135	Bscl2
2_wt.q.05_peak_10355	chr12	85600846	85601140	Jdp2
2_wt.q.05_peak_32919	chr4	147940204	147941089	2510039O18Rik
2_wt.q.05_peak_26722	chr2	129800961	129801777	4932416H05Rik
2_wt.q.05_peak_9832	chr12	65035859	65037462	Prpf39
2_wt.q.05_peak_29248	chr3	95042243	95043251	Psmd4
2_wt.q.05_peak_10890	chr12	111573149	111574721	2810029C07Rik
2_wt.q.05_peak_40682	chr7	127967239	127968738	Fus
2_wt.q.05_peak_169	chr1	16106319	16106775	Rdh10
2_wt.q.05_peak_22031	chr18	56561945	56563175	Phax
2_wt.q.05_peak_16952	chr15	80977813	80978090	Sgsm3
2_wt.q.05_peak_14461	chr14	65262574	65262905	Fzd3
2_wt.q.05_peak_28985	chr3	84304495	84305914	Trim2
2_wt.q.05_peak_13911	chr14	31494387	31495638	Mettl6
2_wt.q.05_peak_17512	chr15	102458827	102459589	Prr13
2_wt.q.05_peak_7621	chr11	78260993	78263668	2610507B11Rik
2_wt.q.05_peak_34546	chr5	90366298	90367823	Gm9958
2_wt.q.05_peak_7994	chr11	93955339	93956180	Nme2
2_wt.q.05_peak_13895	chr14	30951040	30951846	Nek4
2_wt.q.05_peak_29609	chr3	108537358	108537632	1700013F07Rik
2_wt.q.05_peak_40692	chr7	128461346	128462216	Tial1
2_wt.q.05_peak_33553	chr5	25705996	25706459	Xrcc2
2_wt.q.05_peak_14427	chr14	64589212	64590333	Mir124a-1
2_wt.q.05_peak_27084	chr2	143062484	143063283	Snrpb2
2_wt.q.05_peak_38121	chr6	134567288	134567684	Lrp6
2_wt.q.05_peak_5087	chr10	88379758	88380854	Gnptab
2_wt.q.05_peak_23563	chr19	43751760	43753976	Cox15
2_wt.q.05_peak_33127	chr4	155891866	155892986	Acap3
2_wt.q.05_peak_4907	chr10	79959423	79960155	Wdr18
2_wt.q.05_peak_24644	chr2	32360466	32363676	Ciz1
2_wt.q.05_peak_42914	chr8	116504743	116505062	Dynlrb2
2_wt.q.05_peak_6899	chr11	49243314	49244400	Mgat1
2_wt.q.05_peak_44737	chr9	75440945	75442170	Leo1
2_wt.q.05_peak_34567	chr5	92309597	92310249	Sdad1
2_wt.q.05_peak_12702	chr13	92354067	92355015	Dhfr
2_wt.q.05_peak_46216	chrX	136244643	136244987	Wbp5
2_wt.q.05_peak_33738	chr5	34659288	34660817	Nop14
2_wt.q.05_peak_19790	chr17	27017450	27018975	Ggnbp1
2_wt.q.05_peak_26854	chr2	132815533	132816554	Trmt6
2_wt.q.05_peak_42479	chr8	88696417	88697259	Cyld
2_wt.q.05_peak_27742	chr2	180041477	180042951	Psma7
2_wt.q.05_peak_38133	chr6	134886287	134888929	Gpr19
2_wt.q.05_peak_36582	chr6	45059631	45061539	Cntnap2
2_wt.q.05_peak_9983	chr12	71014756	71016063	3110056K07Rik
2_wt.q.05_peak_19810	chr17	27909531	27910433	Anks1
2_wt.q.05_peak_35682	chr5	144099889	144101729	Lmtk2
2_wt.q.05_peak_14152	chr14	52278842	52280117	Rab2b
2_wt.q.05_peak_36487	chr6	39573165	39574416	Adck2
2_wt.q.05_peak_42386	chr8	85026490	85027009	2310036O22Rik
2_wt.q.05_peak_25078	chr2	52424978	52426462	Arl5a
2_wt.q.05_peak_29385	chr3	98013536	98013812	Notch2
2_wt.q.05_peak_11031	chr13	3611278	3611694	Fam208b
2_wt.q.05_peak_7120	chr11	58947374	58950256	Hist3h2ba
2_wt.q.05_peak_7927	chr11	89059303	89061139	Dgke
2_wt.q.05_peak_35602	chr5	140418098	140419291	Eif3b
2_wt.q.05_peak_6013	chr10	128058193	128060531	Ptges3
2_wt.q.05_peak_46324	chrX	160502177	160502683	Phka2
2_wt.q.05_peak_38062	chr6	126939716	126940540	D6Wsu163e
2_wt.q.05_peak_5813	chr10	117224018	117224852	Yeats4
2_wt.q.05_peak_11405	chr13	21944715	21945550	Zfp184
2_wt.q.05_peak_16431	chr15	61984770	61985893	Myc
2_wt.q.05_peak_6927	chr11	50174077	50175231	3010026O09Rik
2_wt.q.05_peak_23957	chr2	3332242	3333457	Rpp38
2_wt.q.05_peak_27454	chr2	158028002	158028790	Rprd1b
2_wt.q.05_peak_35480	chr5	135186197	135188518	Baz1b
2_wt.q.05_peak_42457	chr8	86650939	86652409	Lonp2
2_wt.q.05_peak_25817	chr2	85036598	85037906	Ssrp1
2_wt.q.05_peak_5071	chr10	86704866	86706810	Ttc41
2_wt.q.05_peak_29541	chr3	107279041	107279498	Lamtor5
2_wt.q.05_peak_8223	chr11	100574693	100575396	Cnp
2_wt.q.05_peak_32533	chr4	129188597	129190842	Yars
2_wt.q.05_peak_3847	chr10	18233860	18235592	Ccdc28a
2_wt.q.05_peak_7391	chr11	69980334	69981056	Elp5
2_wt.q.05_peak_44874	chr9	83924339	83925624	Bckdhb
2_wt.q.05_peak_36733	chr6	55037335	55040297	Gars
2_wt.q.05_peak_11924	chr13	49420935	49421917	Ippk
2_wt.q.05_peak_18222	chr16	32277390	32278309	Rnf168
2_wt.q.05_peak_34400	chr5	76950649	76952630	Ppat
2_wt.q.05_peak_6041	chr10	128626268	128627131	Rps26
2_wt.q.05_peak_34245	chr5	70841439	70843608	Gabrg1
2_wt.q.05_peak_35200	chr5	123572091	123573377	Vps33a
2_wt.q.05_peak_29321	chr3	96262487	96264012	Hist2h4
2_wt.q.05_peak_12369	chr13	75839696	75841340	Glrx
2_wt.q.05_peak_37035	chr6	83101597	83101908	Ccdc142
2_wt.q.05_peak_9472	chr12	38778120	38784353	Etv1
2_wt.q.05_peak_3359	chr1	186748726	186749256	Rrp15
2_wt.q.05_peak_25207	chr2	59881543	59883095	Wdsub1
2_wt.q.05_peak_42708	chr8	104641796	104642167	Fam96b
2_wt.q.05_peak_34004	chr5	52471638	52472190	Ccdc149
2_wt.q.05_peak_43987	chr9	45985007	45985298	Pafah1b2
2_wt.q.05_peak_28201	chr3	35931631	35932474	Dcun1d1
2_wt.q.05_peak_22052	chr18	57877913	57878720	Slc12a2
2_wt.q.05_peak_8882	chr12	4233353	4234692	Ptrhd1
2_wt.q.05_peak_899	chr1	54250165	54250627	Ccdc150
2_wt.q.05_peak_37095	chr6	85587278	85588572	Alms1
2_wt.q.05_peak_29243	chr3	94974382	94975188	Pi4kb
2_wt.q.05_peak_25933	chr2	91963670	91964330	Dgkz
2_wt.q.05_peak_11015	chr12	119235959	119239336	Itgb8
2_wt.q.05_peak_29518	chr3	106721132	106723008	Lrif1
2_wt.q.05_peak_14811	chr14	78537144	78537700	Akap11
2_wt.q.05_peak_18744	chr16	59471842	59472358	Mina
2_wt.q.05_peak_41640	chr8	45507489	45507975	Sorbs2
2_wt.q.05_peak_5111	chr10	89731437	89733186	Actr6
2_wt.q.05_peak_32723	chr4	135352807	135354108	Srrm1
2_wt.q.05_peak_45798	chr9	124423356	124425931	4930526I15Rik
2_wt.q.05_peak_36287	chr6	31214795	31221121	Lncpint
2_wt.q.05_peak_27452	chr2	157914010	157915364	Vstm2l
2_wt.q.05_peak_41273	chr8	22858377	22859014	Kat6a
2_wt.q.05_peak_38809	chr7	29767358	29769194	Zfp84
2_wt.q.05_peak_16173	chr15	44746042	44749652	Sybu
2_wt.q.05_peak_14588	chr14	70456594	70457398	Phyhip
2_wt.q.05_peak_29517	chr3	106684989	106685939	Lrif1
2_wt.q.05_peak_14148	chr14	52103610	52104634	Hnrnpc
2_wt.q.05_peak_38791	chr7	29155366	29156514	Fam98c
2_wt.q.05_peak_38027	chr6	125008302	125009300	Zfp384
2_wt.q.05_peak_43998	chr9	46282544	46283416	Bud13
2_wt.q.05_peak_11001	chr12	118300313	118300882	Sp4
2_wt.q.05_peak_35884	chr6	7692009	7693681	Asns
2_wt.q.05_peak_17509	chr15	102405270	102406246	Sp1
2_wt.q.05_peak_21573	chr18	35560734	35564683	Matr3
2_wt.q.05_peak_17960	chr16	20628734	20629482	Ece2
2_wt.q.05_peak_23550	chr19	43439176	43440004	Cnnm1
2_wt.q.05_peak_20023	chr17	36031755	36032171	H2-T23
2_wt.q.05_peak_31064	chr4	41348238	41349233	Ubap1
2_wt.q.05_peak_25445	chr2	69723405	69723893	Ppig
2_wt.q.05_peak_2160	chr1	135284103	135284415	Rnpep
2_wt.q.05_peak_42012	chr8	67973145	67974505	Psd3
2_wt.q.05_peak_46169	chrX	106011399	106012425	Magt1
2_wt.q.05_peak_16533	chr15	66891040	66891365	Wisp1
2_wt.q.05_peak_22656	chr18	84085902	84086816	Tshz1
2_wt.q.05_peak_6025	chr10	128231266	128232805	Timeless
2_wt.q.05_peak_31090	chr4	43000370	43001178	Vcp
2_wt.q.05_peak_32537	chr4	129334707	129336615	Rbbp4
2_wt.q.05_peak_21523	chr18	34623898	34624889	Kif20a
2_wt.q.05_peak_23695	chr19	47136782	47138707	Calhm2
2_wt.q.05_peak_25942	chr2	92191290	92192254	Mir1955
2_wt.q.05_peak_6822	chr11	44470226	44471970	Ublcp1
2_wt.q.05_peak_44957	chr9	89908898	89909382	Rasgrf1
2_wt.q.05_peak_28591	chr3	61362705	61368008	Rap2b
2_wt.q.05_peak_12923	chr13	98262725	98264514	Ankra2
2_wt.q.05_peak_23931	chr19	60226258	60226617	Fam204a
2_wt.q.05_peak_6035	chr10	128498690	128499835	A430046D13Rik
2_wt.q.05_peak_4446	chr10	56228441	56229204	Tbc1d32
2_wt.q.05_peak_31063	chr4	41313779	41315414	Dcaf12
2_wt.q.05_peak_19674	chr17	24527117	24528876	Traf7
2_wt.q.05_peak_40561	chr7	123368453	123370236	Arhgap17
2_wt.q.05_peak_12345	chr13	74316714	74317833	Pdcd6
2_wt.q.05_peak_3431	chr1	191906358	191907007	Slc30a1
2_wt.q.05_peak_21156	chr18	12120839	12122187	Tmem241
2_wt.q.05_peak_38053	chr6	126645165	126646416	Kcna1
2_wt.q.05_peak_12578	chr13	84221985	84222823	Tmem161b
2_wt.q.05_peak_35533	chr5	137046318	137046819	Ap1s1
2_wt.q.05_peak_15912	chr15	35155337	35156270	Stk3
2_wt.q.05_peak_4949	chr10	80825721	80827096	Oaz1
2_wt.q.05_peak_17518	chr15	102517036	102519002	Tarbp2
2_wt.q.05_peak_9171	chr12	24830813	24831766	Mboat2
2_wt.q.05_peak_29335	chr3	96629421	96630537	Rbm8a
2_wt.q.05_peak_27281	chr2	152225756	152229111	Csnk2a1
2_wt.q.05_peak_33017	chr4	150855023	150855621	Errfi1
2_wt.q.05_peak_13616	chr14	20388543	20389302	Dnajc9
2_wt.q.05_peak_13917	chr14	31829004	31830682	Ankrd28
2_wt.q.05_peak_38431	chr6	149409060	149410098	Bicd1
2_wt.q.05_peak_22264	chr18	65430379	65431515	Malt1
2_wt.q.05_peak_22933	chr19	8712739	8713296	Slc3a2
2_wt.q.05_peak_555	chr1	37863628	37865935	Tsga10
2_wt.q.05_peak_8821	chr11	120932279	120933213	Ccdc57
2_wt.q.05_peak_9261	chr12	29526497	29531955	Myt1l
2_wt.q.05_peak_17193	chr15	92050878	92052970	Cntn1
2_wt.q.05_peak_36146	chr6	28133096	28136059	Grm8
2_wt.q.05_peak_21640	chr18	37643943	37644529	Taf7
2_wt.q.05_peak_22844	chr19	5845237	5845670	Neat1
2_wt.q.05_peak_44340	chr9	59353503	59353836	Bbs4
2_wt.q.05_peak_40554	chr7	123123860	123125706	Tnrc6a
2_wt.q.05_peak_7334	chr11	68852593	68853838	Ndel1
2_wt.q.05_peak_12706	chr13	92529715	92531552	Zfyve16
2_wt.q.05_peak_25855	chr2	90744870	90746505	Fnbp4
2_wt.q.05_peak_36082	chr6	21948819	21950633	Ing3
2_wt.q.05_peak_22887	chr19	7055371	7056503	Macrod1
2_wt.q.05_peak_17561	chr16	4211646	4213175	Crebbp
2_wt.q.05_peak_19491	chr17	10319529	10321141	Cahm
2_wt.q.05_peak_20785	chr17	83513878	83514830	Cox7a2l
2_wt.q.05_peak_25866	chr2	90903533	90905743	Ndufs3
2_wt.q.05_peak_27531	chr2	163657823	163659724	Pkig
2_wt.q.05_peak_13612	chr14	20082665	20083557	Saysd1
2_wt.q.05_peak_22832	chr19	5688690	5689915	Map3k11
2_wt.q.05_peak_133	chr1	12990528	12992980	Slco5a1
2_wt.q.05_peak_23717	chr19	47865419	47866040	Gsto2
2_wt.q.05_peak_33744	chr5	35020197	35020972	Mir3097
2_wt.q.05_peak_35713	chr5	145203836	145205104	Zkscan5
2_wt.q.05_peak_45018	chr9	95406579	95407591	Chst2
2_wt.q.05_peak_20064	chr17	42876991	42877376	Cd2ap
2_wt.q.05_peak_11564	chr13	32338834	32339204	Gmds
2_wt.q.05_peak_21747	chr18	40255442	40261134	Kctd16
2_wt.q.05_peak_10034	chr12	73964186	73965074	Snapc1
2_wt.q.05_peak_4897	chr10	79746163	79747121	Polrmt
2_wt.q.05_peak_19362	chr17	3482434	3486490	Tiam2
2_wt.q.05_peak_40292	chr7	112427911	112428313	Parva
2_wt.q.05_peak_13617	chr14	20393397	20393979	Mrps16
2_wt.q.05_peak_5075	chr10	86779342	86779933	Nt5dc3
2_wt.q.05_peak_40116	chr7	101905511	101906195	Lamtor1
2_wt.q.05_peak_36840	chr6	63256667	63257643	Grid2
2_wt.q.05_peak_28608	chr3	63296293	63296714	Mme
2_wt.q.05_peak_7226	chr11	62549536	62551433	Ubb
2_wt.q.05_peak_16304	chr15	53901246	53902756	Samd12
2_wt.q.05_peak_1291	chr1	75262865	75265033	Ptprn
2_wt.q.05_peak_24735	chr2	34771257	34772277	Hspa5
2_wt.q.05_peak_38489	chr7	4915246	4916000	Zfp628
2_wt.q.05_peak_40599	chr7	125706703	125708510	Gtf3c1
2_wt.q.05_peak_37055	chr6	83571937	83572737	Stambp
2_wt.q.05_peak_26487	chr2	119156419	119157504	Rmdn3
2_wt.q.05_peak_29228	chr3	94412600	94413647	Tdrkh
2_wt.q.05_peak_3596	chr10	5922483	5923654	Rgs17
2_wt.q.05_peak_27104	chr2	143544490	143548506	Pcsk2
2_wt.q.05_peak_27013	chr2	139676579	139677801	Ism1
2_wt.q.05_peak_42068	chr8	69790200	69791439	Atp13a1
2_wt.q.05_peak_15998	chr15	37959425	37961928	Rrm2b
2_wt.q.05_peak_12235	chr13	67359965	67360940	Zfp953
2_wt.q.05_peak_20131	chr17	46282401	46283265	Tjap1
2_wt.q.05_peak_19896	chr17	31511704	31512187	Wdr4
2_wt.q.05_peak_4822	chr10	75859657	75860616	Mif
2_wt.q.05_peak_11540	chr13	29986255	29986874	E2f3
2_wt.q.05_peak_3264	chr1	181143730	181145441	Nvl
2_wt.q.05_peak_11452	chr13	23738191	23740603	Hist1h1c
2_wt.q.05_peak_41596	chr8	40633499	40634792	Mtmr7
2_wt.q.05_peak_873	chr1	53706696	53707106	Dnah7a
2_wt.q.05_peak_24497	chr2	26444562	26447042	Sec16a
2_wt.q.05_peak_30791	chr4	21775603	21776894	Usp45
2_wt.q.05_peak_4831	chr10	76237530	76238148	Prmt2
2_wt.q.05_peak_16909	chr15	79773629	79775953	Dnal4
2_wt.q.05_peak_13583	chr14	18270750	18271703	Nkiras1
2_wt.q.05_peak_17007	chr15	82354436	82354716	Ndufa6
2_wt.q.05_peak_43164	chr8	128358019	128360943	Mir1903
2_wt.q.05_peak_5883	chr10	121476424	121477074	Rassf3
2_wt.q.05_peak_11656	chr13	38036618	38037648	Riok1
2_wt.q.05_peak_28291	chr3	41562898	41565189	Jade1
2_wt.q.05_peak_38785	chr7	28961430	28962734	Actn4
2_wt.q.05_peak_29168	chr3	89322083	89322352	Efna3
2_wt.q.05_peak_14149	chr14	52196356	52197750	Supt16
2_wt.q.05_peak_25492	chr2	71211440	71212506	Dync1i2
2_wt.q.05_peak_11393	chr13	21749977	21751616	Hist1h4k
2_wt.q.05_peak_28605	chr3	62506526	62507356	Dhx36
2_wt.q.05_peak_14219	chr14	55642812	55643572	Tm9sf1
2_wt.q.05_peak_24553	chr2	29346371	29347180	Med27
2_wt.q.05_peak_31936	chr4	99193420	99194247	Atg4c
2_wt.q.05_peak_38560	chr7	16285593	16287071	Ccdc9
2_wt.q.05_peak_21429	chr18	30272372	30273388	Pik3c3
2_wt.q.05_peak_26552	chr2	120970362	120971131	Ubr1
2_wt.q.05_peak_12668	chr13	91387641	91389217	A830009L08Rik
2_wt.q.05_peak_39501	chr7	75454987	75456700	Akap13
2_wt.q.05_peak_40017	chr7	99483009	99484372	Rps3
2_wt.q.05_peak_38815	chr7	29905778	29907234	Mir7668
2_wt.q.05_peak_27255	chr2	151008507	151009065	Ninl
2_wt.q.05_peak_33833	chr5	39603652	39604342	4930513D17Rik
2_wt.q.05_peak_26407	chr2	116063766	116064100	Meis2
2_wt.q.05_peak_23645	chr19	46304430	46304806	Nfkb2
2_wt.q.05_peak_34860	chr5	110107458	110108862	Gtpbp6
2_wt.q.05_peak_28439	chr3	53863446	53864380	Ufm1
2_wt.q.05_peak_42879	chr8	111940150	111941193	Gabarapl2
2_wt.q.05_peak_18367	chr16	36040519	36041815	Wdr5b
2_wt.q.05_peak_24448	chr2	24047777	24049859	Hnmt
2_wt.q.05_peak_13118	chr13	105054285	105055560	Rgs7bp
2_wt.q.05_peak_38756	chr7	28169038	28170438	Fbl
2_wt.q.05_peak_43202	chr9	4794595	4796845	Gria4
2_wt.q.05_peak_24305	chr2	16355040	16357581	Plxdc2
2_wt.q.05_peak_28154	chr3	33082736	33083695	Pex5l
2_wt.q.05_peak_1144	chr1	65186019	65187350	Pikfyve
2_wt.q.05_peak_17364	chr15	98933302	98935342	Tuba1b
2_wt.q.05_peak_1267	chr1	74600871	74601812	Rnf25
2_wt.q.05_peak_8699	chr11	116842441	116844490	Jmjd6
2_wt.q.05_peak_38394	chr6	147042487	147043766	Mrps35
2_wt.q.05_peak_13952	chr14	34309954	34310794	Fam35a
2_wt.q.05_peak_40869	chr7	140856396	140857281	Bet1l
2_wt.q.05_peak_8987	chr12	8973585	8974606	Wdr35
2_wt.q.05_peak_24786	chr2	37451597	37452328	Rabgap1
2_wt.q.05_peak_21618	chr18	36559366	36562176	Ankhd1
2_wt.q.05_peak_42455	chr8	86623445	86625056	Lonp2
2_wt.q.05_peak_34762	chr5	104021733	104022139	Hsd17b11
2_wt.q.05_peak_2762	chr1	162547932	162549928	Mettl13
2_wt.q.05_peak_23523	chr19	41848157	41849015	Frat2
2_wt.q.05_peak_26644	chr2	125783385	125783904	Secisbp2l
2_wt.q.05_peak_28247	chr3	38483762	38485490	Ankrd50
2_wt.q.05_peak_26739	chr2	130284232	130284714	Idh3b
2_wt.q.05_peak_4193	chr10	39730886	39731859	E130307A14Rik
2_wt.q.05_peak_45044	chr9	96258983	96260223	Tfdp2
2_wt.q.05_peak_7905	chr11	87662308	87663373	Rnf43
2_wt.q.05_peak_31215	chr4	48473069	48474064	Tex10
2_wt.q.05_peak_43980	chr9	45828405	45829299	Cep164
2_wt.q.05_peak_32960	chr4	149484203	149486452	Lzic
2_wt.q.05_peak_40865	chr7	140821387	140822102	Zfp941
2_wt.q.05_peak_12997	chr13	100730225	100731251	Cdk7
2_wt.q.05_peak_16682	chr15	73060514	73061397	Trappc9
2_wt.q.05_peak_38464	chr7	3692542	3694565	Mboat7
2_wt.q.05_peak_38430	chr6	149308999	149310586	2810474O19Rik
2_wt.q.05_peak_34565	chr5	92137279	92138250	Uso1
2_wt.q.05_peak_43020	chr8	123101923	123102270	Rpl13
2_wt.q.05_peak_33739	chr5	34761002	34763447	Htt
2_wt.q.05_peak_18239	chr16	32877320	32877673	Fyttd1
2_wt.q.05_peak_18720	chr16	57121070	57123439	Tomm70a
2_wt.q.05_peak_33505	chr5	23842958	23844945	Tomm7
2_wt.q.05_peak_32609	chr4	132274050	132275101	Taf12
2_wt.q.05_peak_19749	chr17	26203065	26203734	Rgs11
2_wt.q.05_peak_16327	chr15	55071491	55072761	Taf2
2_wt.q.05_peak_31306	chr4	56801736	56802896	Fam206a
2_wt.q.05_peak_40364	chr7	116333841	116334838	Rps13
2_wt.q.05_peak_11874	chr13	46501160	46503436	Cap2
2_wt.q.05_peak_23033	chr19	12501720	12502368	Dtx4
2_wt.q.05_peak_15995	chr15	37790464	37792233	Ncald
2_wt.q.05_peak_2244	chr1	137965729	137966160	Mir181a-1
2_wt.q.05_peak_20317	chr17	57010755	57012155	Gtf2f1
2_wt.q.05_peak_45910	chrX	36903299	36904021	Nkrf
2_wt.q.05_peak_14587	chr14	70442967	70444179	Mir320
2_wt.q.05_peak_19522	chr17	12118755	12121020	Agpat4
2_wt.q.05_peak_40916	chr7	144175931	144176545	Shank2
2_wt.q.05_peak_44215	chr9	54980399	54980673	Chrna5
2_wt.q.05_peak_10374	chr12	86078694	86079849	Tgfb3
2_wt.q.05_peak_43187	chr9	4308708	4310721	Kbtbd3
2_wt.q.05_peak_23467	chr19	37375558	37376775	Kif11
2_wt.q.05_peak_22987	chr19	10576559	10577421	Tmem138
2_wt.q.05_peak_15422	chr15	3581897	3583489	Ghr
2_wt.q.05_peak_20176	chr17	47924834	47925274	Foxp4
2_wt.q.05_peak_25543	chr2	73213774	73214274	Ola1
2_wt.q.05_peak_15901	chr15	34494661	34495743	Hrsp12
2_wt.q.05_peak_11443	chr13	23570279	23573253	Hist1h2bg
2_wt.q.05_peak_35735	chr5	146963297	146963783	Mtif3
2_wt.q.05_peak_40367	chr7	116503765	116504949	Nucb2
2_wt.q.05_peak_38402	chr6	148212142	148213055	Ergic2
2_wt.q.05_peak_36202	chr6	29467713	29468291	Atp6v1f
2_wt.q.05_peak_46208	chrX	134600070	134601947	Gla
2_wt.q.05_peak_27260	chr2	151541930	151542500	Fkbp1a
2_wt.q.05_peak_35574	chr5	139149171	139150364	Dnaaf5
2_wt.q.05_peak_12410	chr13	77708265	77708950	Fam172a
2_wt.q.05_peak_1727	chr1	99772341	99774734	Cntnap5b
2_wt.q.05_peak_46261	chrX	151520286	151521728	Phf8
2_wt.q.05_peak_38983	chr7	44848653	44850269	Akt1s1
2_wt.q.05_peak_42777	chr8	107095044	107096884	Mir7075
2_wt.q.05_peak_22970	chr19	9979823	9980413	Fth1
2_wt.q.05_peak_42851	chr8	111259030	111259605	Glg1
2_wt.q.05_peak_21119	chr18	10029196	10029846	Usp14
2_wt.q.05_peak_30653	chr4	11963824	11967847	Pdp1
2_wt.q.05_peak_7841	chr11	86543702	86545598	Rps6kb1
2_wt.q.05_peak_14202	chr14	55106304	55107462	Ap1g2
2_wt.q.05_peak_29660	chr3	115887133	115889127	A930005H10Rik
2_wt.q.05_peak_10776	chr12	105783779	105784468	Papola
2_wt.q.05_peak_33644	chr5	31697342	31698436	Bre
2_wt.q.05_peak_23320	chr19	29101023	29102077	Rcl1
2_wt.q.05_peak_38459	chr7	3644073	3645524	Cnot3
2_wt.q.05_peak_40840	chr7	139388345	139389692	Inpp5a
2_wt.q.05_peak_16413	chr15	59647453	59649315	Trib1
2_wt.q.05_peak_15886	chr15	34082036	34084653	Mtdh
2_wt.q.05_peak_41799	chr8	54953524	54955348	Gpm6a
2_wt.q.05_peak_6634	chr11	34833402	34834252	Spdl1
2_wt.q.05_peak_26354	chr2	113848772	113849320	Arhgap11a
2_wt.q.05_peak_32216	chr4	116150022	116150433	Pomgnt1
2_wt.q.05_peak_4226	chr10	40682046	40684875	Mettl24
2_wt.q.05_peak_43356	chr9	21287160	21288417	Kri1
2_wt.q.05_peak_22948	chr19	8839231	8840951	Bscl2
2_wt.q.05_peak_8229	chr11	100737881	100739282	Rab5c
2_wt.q.05_peak_23539	chr19	42255253	42257341	Golga7b
2_wt.q.05_peak_2369	chr1	146493319	146496061	Brinp3
2_wt.q.05_peak_12010	chr13	54611402	54612152	Cltb
2_wt.q.05_peak_11582	chr13	34162706	34163559	Psmg4
2_wt.q.05_peak_10335	chr12	85151014	85151589	Rps6kl1
2_wt.q.05_peak_16866	chr15	79074890	79075458	Eif3l
2_wt.q.05_peak_7126	chr11	59201345	59203010	2610507I01Rik
2_wt.q.05_peak_24297	chr2	14873597	14874683	Cacnb2
2_wt.q.05_peak_4827	chr10	75935889	75937141	Chchd10
2_wt.q.05_peak_45366	chr9	108566636	108567964	Ndufaf3
2_wt.q.05_peak_33633	chr5	31240194	31240744	Nrbp1
2_wt.q.05_peak_27679	chr2	170731465	170733098	Dok5
2_wt.q.05_peak_12221	chr13	64369689	64370804	Ctsl
2_wt.q.05_peak_19982	chr17	34980836	34982082	Lsm2
2_wt.q.05_peak_22167	chr18	61640010	61641288	Bvht
2_wt.q.05_peak_7324	chr11	68691537	68692377	Myh10
2_wt.q.05_peak_41447	chr8	33653023	33654832	Gsr
2_wt.q.05_peak_24479	chr2	25579985	25581436	Gm996
2_wt.q.05_peak_22381	chr18	69343853	69346089	Tcf4
2_wt.q.05_peak_2475	chr1	153330535	153333788	Lamc1
2_wt.q.05_peak_26533	chr2	120563306	120564464	Zfp106
2_wt.q.05_peak_30535	chr4	3574385	3575178	Tmem68
2_wt.q.05_peak_34309	chr5	73292457	73294542	Ociad1
2_wt.q.05_peak_31795	chr4	88033013	88034276	Mllt3
2_wt.q.05_peak_27285	chr2	152332208	152332923	Rbck1
2_wt.q.05_peak_29473	chr3	103968414	103969626	Phtf1os
2_wt.q.05_peak_25696	chr2	79634521	79635229	Ssfa2
2_wt.q.05_peak_4166	chr10	37138652	37139474	Marcks
2_wt.q.05_peak_45146	chr9	102835266	102836416	Ryk
2_wt.q.05_peak_20133	chr17	46298515	46299245	Dlk2
2_wt.q.05_peak_37750	chr6	113604486	113606419	Brk1
2_wt.q.05_peak_18512	chr16	42339744	42340484	Gap43
2_wt.q.05_peak_22366	chr18	68299811	68300855	Fam210a
2_wt.q.05_peak_46181	chrX	112311240	112311887	Apool
2_wt.q.05_peak_29950	chr3	127837657	127838073	Ap1ar
2_wt.q.05_peak_3826	chr10	17721727	17723709	Cited2
2_wt.q.05_peak_34515	chr5	88719396	88720809	Mob1b
2_wt.q.05_peak_8274	chr11	101732922	101733450	Dhx8
2_wt.q.05_peak_22876	chr19	6920704	6922970	Esrra
2_wt.q.05_peak_22989	chr19	10634689	10634992	Vwce
2_wt.q.05_peak_33435	chr5	21645690	21646162	Armc10
2_wt.q.05_peak_18644	chr16	50528316	50529985	G730013B05Rik
2_wt.q.05_peak_37341	chr6	93912315	93913965	Magi1
2_wt.q.05_peak_42526	chr8	92900339	92901203	Capns2
2_wt.q.05_peak_23039	chr19	12795706	12797533	Zfp91
2_wt.q.05_peak_37980	chr6	122308137	122309539	M6pr
2_wt.q.05_peak_24986	chr2	45110472	45115753	Zeb2
2_wt.q.05_peak_1866	chr1	119835831	119836887	Ptpn4
2_wt.q.05_peak_39141	chr7	52005586	52006827	Svip
2_wt.q.05_peak_10108	chr12	75668929	75670444	Wdr89
2_wt.q.05_peak_17382	chr15	99294639	99294971	Prpf40b
2_wt.q.05_peak_38827	chr7	30169118	30170616	Gm5113
2_wt.q.05_peak_6896	chr11	49202716	49204220	Zfp62
2_wt.q.05_peak_25772	chr2	83723794	83725785	Itgav
2_wt.q.05_peak_43277	chr9	14784012	14785336	Mre11a
2_wt.q.05_peak_36953	chr6	72957889	72959542	Tmsb10
2_wt.q.05_peak_33551	chr5	25499128	25500129	4831440E17Rik
2_wt.q.05_peak_4140	chr10	34280820	34282031	Tspyl1
2_wt.q.05_peak_35139	chr5	122372253	122372674	Gpn3
2_wt.q.05_peak_43325	chr9	20491577	20493833	Zfp426
2_wt.q.05_peak_31797	chr4	88093870	88095237	Focad
2_wt.q.05_peak_45155	chr9	103112598	103113353	Rab6b
2_wt.q.05_peak_31238	chr4	49845328	49846056	Grin3a
2_wt.q.05_peak_6903	chr11	49292648	49293183	Olfr1392
2_wt.q.05_peak_17530	chr15	102720546	102723069	Calcoco1
2_wt.q.05_peak_15521	chr15	11996127	11996387	Sub1
2_wt.q.05_peak_24736	chr2	34772678	34773333	Hspa5
2_wt.q.05_peak_38811	chr7	29815204	29816428	Zfp790
2_wt.q.05_peak_25916	chr2	91710359	91711548	Harbi1
2_wt.q.05_peak_21120	chr18	10030281	10030806	Usp14
2_wt.q.05_peak_7511	chr11	75170389	75171153	Hic1
2_wt.q.05_peak_17833	chr16	15593515	15594913	Ube2v2
2_wt.q.05_peak_27374	chr2	156143864	156144696	Romo1
2_wt.q.05_peak_22526	chr18	76240598	76241801	Smad2
2_wt.q.05_peak_46338	chrX	160993891	160995993	Cdkl5
2_wt.q.05_peak_23664	chr19	46572607	46574646	Sfxn2
2_wt.q.05_peak_26700	chr2	129129012	129130062	Chchd5
2_wt.q.05_peak_11605	chr13	35905425	35906444	Rpp40
2_wt.q.05_peak_3218	chr1	179517303	179517948	Smyd3
2_wt.q.05_peak_18669	chr16	52450003	52454337	Alcam
2_wt.q.05_peak_30041	chr3	135438325	135438862	4930539J05Rik
2_wt.q.05_peak_7810	chr11	84870945	84871843	Ggnbp2os
2_wt.q.05_peak_17438	chr15	100303019	100305067	Mettl7a1
2_wt.q.05_peak_8473	chr11	106611714	106612886	Tex2
2_wt.q.05_peak_22775	chr19	4510196	4510734	Pcx
2_wt.q.05_peak_38466	chr7	3703545	3704774	Rps9
2_wt.q.05_peak_19727	chr17	25823232	25823972	Wdr24
2_wt.q.05_peak_17815	chr16	13671171	13673126	3110001I22Rik
2_wt.q.05_peak_39291	chr7	64393123	64393437	Mcee
2_wt.q.05_peak_17361	chr15	98881068	98881796	Rhebl1
2_wt.q.05_peak_24637	chr2	32235380	32237289	Pomt1
2_wt.q.05_peak_8247	chr11	101119409	101120390	Fam134c
2_wt.q.05_peak_23600	chr19	45013793	45014569	Lzts2
2_wt.q.05_peak_38026	chr6	124998039	124998949	Pianp
2_wt.q.05_peak_35886	chr6	7845379	7846762	C1galt1
2_wt.q.05_peak_45959	chrX	48518711	48519330	Rab33a
2_wt.q.05_peak_29542	chr3	107332634	107334325	Rbm15
2_wt.q.05_peak_14605	chr14	70629086	70629571	Dmtn
2_wt.q.05_peak_1201	chr1	67038043	67039246	Lancl1
2_wt.q.05_peak_26733	chr2	130177068	130179792	Snrpb
2_wt.q.05_peak_38847	chr7	30558040	30560275	Lin37
2_wt.q.05_peak_39964	chr7	97400147	97400639	Ndufc2
2_wt.q.05_peak_19591	chr17	15499399	15499796	Tbp
2_wt.q.05_peak_12158	chr13	60177181	60177974	Gas1
2_wt.q.05_peak_24393	chr2	20520051	20520910	Etl4
2_wt.q.05_peak_7294	chr11	67596001	67598746	Gas7
2_wt.q.05_peak_3021	chr1	171287537	171288434	Usp21
2_wt.q.05_peak_5854	chr10	119818794	119819287	Grip1
2_wt.q.05_peak_3901	chr10	20722835	20726679	Pde7b
2_wt.q.05_peak_9486	chr12	40038202	40038518	Arl4a
2_wt.q.05_peak_45317	chr9	107770610	107770990	Rbm5
2_wt.q.05_peak_4105	chr10	31609719	31610409	Rnf217
2_wt.q.05_peak_1993	chr1	128243573	128246006	Ubxn4
2_wt.q.05_peak_19088	chr16	84833877	84835629	Atp5j
2_wt.q.05_peak_34696	chr5	100498696	100500048	Lin54
2_wt.q.05_peak_46109	chrX	95443969	95445141	Amer1
2_wt.q.05_peak_18625	chr16	49698427	49700364	Ift57
2_wt.q.05_peak_42105	chr8	70754494	70755066	Rab3a
2_wt.q.05_peak_41478	chr8	34965473	34966259	Tnks
2_wt.q.05_peak_28185	chr3	34081090	34081577	Dnajc19
2_wt.q.05_peak_21336	chr18	24019990	24020341	Zfp24
2_wt.q.05_peak_31608	chr4	80910473	80912298	Lurap1l
2_wt.q.05_peak_26484	chr2	119046395	119047126	Casc5
2_wt.q.05_peak_45834	chrX	12761843	12762854	Gm14634
2_wt.q.05_peak_28234	chr3	37312518	37314119	Bbs12
2_wt.q.05_peak_16752	chr15	75920955	75922111	Pycrl
2_wt.q.05_peak_8267	chr11	101665109	101665943	Arl4d
2_wt.q.05_peak_27435	chr2	156991450	156992018	Ndrg3
2_wt.q.05_peak_125	chr1	12691543	12692255	Sulf1
2_wt.q.05_peak_1602	chr1	91297922	91298189	Scly
2_wt.q.05_peak_15900	chr15	34442754	34444000	Rpl30
2_wt.q.05_peak_10886	chr12	111537373	111538571	Eif5
2_wt.q.05_peak_21123	chr18	10179261	10183039	Rock1
2_wt.q.05_peak_35925	chr6	11925203	11926773	Phf14
2_wt.q.05_peak_2826	chr1	165091704	165092272	4930568G15Rik
2_wt.q.05_peak_30367	chr3	152346085	152346400	Usp33
2_wt.q.05_peak_45269	chr9	106684760	106686863	Tex264
2_wt.q.05_peak_33111	chr4	155563197	155564374	Nadk
2_wt.q.05_peak_31031	chr4	40279544	40280039	Ndufb6
2_wt.q.05_peak_37352	chr6	94283526	94284442	Magi1
2_wt.q.05_peak_20703	chr17	80125924	80127715	Galm
2_wt.q.05_peak_4134	chr10	34018534	34019310	Rwdd1
2_wt.q.05_peak_38422	chr6	148946032	148947094	Fam60a
2_wt.q.05_peak_13000	chr13	100832412	100833860	Slc30a5
2_wt.q.05_peak_11793	chr13	44730655	44733286	Jarid2
2_wt.q.05_peak_14474	chr14	65837010	65837679	Ccdc25
2_wt.q.05_peak_24621	chr2	31670420	31671115	Exosc2
2_wt.q.05_peak_35669	chr5	143757936	143758892	D130017N08Rik
2_wt.q.05_peak_4894	chr10	79668957	79670050	Tpgs1
2_wt.q.05_peak_11572	chr13	34002004	34003231	Serpinb6a
2_wt.q.05_peak_13632	chr14	20694457	20695555	Fut11
2_wt.q.05_peak_26574	chr2	121358398	121358693	Ckmt1
2_wt.q.05_peak_19969	chr17	34628848	34630201	Prrt1
2_wt.q.05_peak_31113	chr4	44012113	44013241	Clta
2_wt.q.05_peak_29209	chr3	90509192	90510231	Chtop
2_wt.q.05_peak_32718	chr4	134922961	134924275	Rsrp1
2_wt.q.05_peak_25819	chr2	85049672	85051447	Tnks1bp1
2_wt.q.05_peak_1484	chr1	84935311	84936268	Slc16a14
2_wt.q.05_peak_10823	chr12	108423349	108424255	Eml1
2_wt.q.05_peak_19771	chr17	26676117	26677649	Atp6v0e
2_wt.q.05_peak_32613	chr4	132353116	132353887	Snhg3
2_wt.q.05_peak_5858	chr10	120112357	120113351	Helb
2_wt.q.05_peak_27351	chr2	155356857	155357929	Pigu
2_wt.q.05_peak_45580	chr9	113792799	113793075	Clasp2
2_wt.q.05_peak_19545	chr17	12915507	12917317	Tcp1
2_wt.q.05_peak_16970	chr15	81360150	81360691	Slc25a17
2_wt.q.05_peak_4578	chr10	63337766	63338309	Sirt1
2_wt.q.05_peak_35779	chr5	149048924	149053032	Hmgb1
2_wt.q.05_peak_22761	chr19	4231113	4232246	Pold4
2_wt.q.05_peak_32257	chr4	118178926	118180716	Kdm4a
2_wt.q.05_peak_1143	chr1	65178565	65179237	Idh1
2_wt.q.05_peak_31307	chr4	56862930	56866064	Ctnnal1
2_wt.q.05_peak_21863	chr18	45558340	45561566	Kcnn2
2_wt.q.05_peak_16354	chr15	57911575	57913085	Tbc1d31
2_wt.q.05_peak_26526	chr2	120154120	120154469	Ehd4
2_wt.q.05_peak_39045	chr7	45896535	45897927	Tmem143
2_wt.q.05_peak_46323	chrX	160137454	160138389	Pdha1
2_wt.q.05_peak_22470	chr18	72350039	72351166	Dcc
2_wt.q.05_peak_32505	chr4	128654018	128655104	Phc2
2_wt.q.05_peak_13403	chr13	119789555	119790596	Zfp131
2_wt.q.05_peak_6966	chr11	51688474	51689870	0610009B22Rik
2_wt.q.05_peak_2200	chr1	136346262	136346698	Camsap2
2_wt.q.05_peak_40221	chr7	111082753	111084360	Eif4g2
2_wt.q.05_peak_10591	chr12	98627915	98628530	Spata7
2_wt.q.05_peak_22756	chr19	4096838	4097930	Cdk2ap2
2_wt.q.05_peak_32133	chr4	108847861	108848324	Kti12
2_wt.q.05_peak_4629	chr10	67096630	67099214	Reep3
2_wt.q.05_peak_19990	chr17	35164650	35166059	Prrc2a
2_wt.q.05_peak_27741	chr2	180024040	180025536	Lsm14b
2_wt.q.05_peak_7148	chr11	59839093	59840261	Cops3
2_wt.q.05_peak_5288	chr10	95500936	95501964	Mrpl42
2_wt.q.05_peak_43750	chr9	37613087	37614733	Siae
2_wt.q.05_peak_24368	chr2	19656978	19658071	Gm3230
2_wt.q.05_peak_22594	chr18	79110097	79110427	Setbp1
2_wt.q.05_peak_45364	chr9	108559643	108560334	Impdh2
2_wt.q.05_peak_12940	chr13	98890842	98891691	Tnpo1
2_wt.q.05_peak_25409	chr2	68470776	68471691	Stk39
2_wt.q.05_peak_40130	chr7	102759235	102759546	Olfr78
2_wt.q.05_peak_4082	chr10	30617783	30618445	Hint3
2_wt.q.05_peak_35470	chr5	135008535	135010213	Abhd11
2_wt.q.05_peak_12841	chr13	96387555	96389018	Poc5
2_wt.q.05_peak_11670	chr13	40999914	41001506	Pak1ip1
2_wt.q.05_peak_20275	chr17	55712086	55713119	Pot1b
2_wt.q.05_peak_44690	chr9	74975440	74976577	Fam214a
2_wt.q.05_peak_19707	chr17	25222776	25223578	Unkl
2_wt.q.05_peak_41827	chr8	56294012	56294674	Hpgd
2_wt.q.05_peak_33622	chr5	31054410	31055352	Cad
2_wt.q.05_peak_37716	chr6	112946159	112947551	Srgap3
2_wt.q.05_peak_35525	chr5	136567929	136568595	Cux1
2_wt.q.05_peak_34407	chr5	77310025	77310938	Polr2b
2_wt.q.05_peak_45597	chr9	114639613	114640598	Cnot10
2_wt.q.05_peak_7498	chr11	74897246	74898841	Tsr1
2_wt.q.05_peak_44399	chr9	61913936	61915094	Rplp1
2_wt.q.05_peak_1080	chr1	63114571	63115891	Ino80dos
2_wt.q.05_peak_24274	chr2	13543687	13545095	Trdmt1
2_wt.q.05_peak_11394	chr13	21753151	21755020	Hist1h2bn
2_wt.q.05_peak_21673	chr18	38249672	38250569	1700086O06Rik
2_wt.q.05_peak_1934	chr1	125560575	125560862	Slc35f5
2_wt.q.05_peak_26041	chr2	97466087	97469757	Lrrc4c
2_wt.q.05_peak_33700	chr5	33782367	33783326	Letm1
2_wt.q.05_peak_9825	chr12	64918488	64919051	Gm527
2_wt.q.05_peak_33853	chr5	41843668	41844685	Bod1l
2_wt.q.05_peak_33625	chr5	31093573	31094815	Slc30a3
2_wt.q.05_peak_6905	chr11	49326844	49327381	Olfr1391
2_wt.q.05_peak_21279	chr18	21299909	21300524	Garem
2_wt.q.05_peak_38308	chr6	142963978	142965157	St8sia1
2_wt.q.05_peak_18950	chr16	74410808	74411999	Robo2
2_wt.q.05_peak_22611	chr18	80470136	80470575	Ctdp1
2_wt.q.05_peak_2774	chr1	163929331	163930030	Scyl3
2_wt.q.05_peak_21114	chr18	9450240	9450798	Ccny
2_wt.q.05_peak_34172	chr5	65491582	65493723	Smim14
2_wt.q.05_peak_18899	chr16	70313910	70314907	Gbe1
2_wt.q.05_peak_12233	chr13	67306044	67306865	Zfp457
2_wt.q.05_peak_31493	chr4	70534631	70536044	Megf9
2_wt.q.05_peak_40698	chr7	128611900	128612347	Inpp5f
2_wt.q.05_peak_17317	chr15	96699734	96700342	Slc38a2
2_wt.q.05_peak_39643	chr7	82648123	82649372	Eftud1
2_wt.q.05_peak_45839	chrX	13070375	13071287	Usp9x
2_wt.q.05_peak_33582	chr5	28316309	28317113	Rbm33
2_wt.q.05_peak_19571	chr17	14204096	14205025	Dact2
2_wt.q.05_peak_10588	chr12	98574121	98574675	Kcnk10
2_wt.q.05_peak_5990	chr10	127310984	127312706	Mars
2_wt.q.05_peak_46010	chrX	70385347	70386323	1110012L19Rik
2_wt.q.05_peak_1817	chr1	109981576	109983557	Cdh7
2_wt.q.05_peak_28641	chr3	65666902	65667219	Lekr1
2_wt.q.05_peak_29289	chr3	95855809	95856496	Prpf3
2_wt.q.05_peak_45414	chr9	110531608	110533214	Setd2
2_wt.q.05_peak_23643	chr19	46075420	46076443	Nolc1
2_wt.q.05_peak_34885	chr5	110839555	110840176	Hscb
2_wt.q.05_peak_12030	chr13	55105032	55105696	Zfp346
2_wt.q.05_peak_19820	chr17	28620771	28622398	Srpk1
2_wt.q.05_peak_21828	chr18	43393159	43393766	Dpysl3
2_wt.q.05_peak_7340	chr11	69015560	69016301	Ctc1
2_wt.q.05_peak_18711	chr16	56028138	56030792	Pcnp
2_wt.q.05_peak_23434	chr19	36918660	36919868	Fgfbp3
2_wt.q.05_peak_19697	chr17	25014565	25015090	Cramp1l
2_wt.q.05_peak_1425	chr1	82724498	82725877	Mff
2_wt.q.05_peak_39358	chr7	66839283	66840004	Adamts17
2_wt.q.05_peak_46005	chrX	69360813	69361634	Aff2
2_wt.q.05_peak_21016	chr17	94834503	94834815	Gm1976
2_wt.q.05_peak_29343	chr3	96904689	96905805	Gpr89
2_wt.q.05_peak_28774	chr3	73708033	73708406	Bche
2_wt.q.05_peak_24281	chr2	14073206	14074071	Stamos
2_wt.q.05_peak_42397	chr8	85082714	85084050	Man2b1
2_wt.q.05_peak_19925	chr17	32965209	32966044	Cyp4f41-ps
2_wt.q.05_peak_17592	chr16	4963274	4964910	Anks3
2_wt.q.05_peak_23494	chr19	40588028	40589692	Aldh18a1
2_wt.q.05_peak_25448	chr2	69789024	69789557	Ccdc173
2_wt.q.05_peak_38478	chr7	4684549	4685281	Hspbp1
2_wt.q.05_peak_8048	chr11	95666130	95667530	Phb
2_wt.q.05_peak_2752	chr1	161968888	161969553	Pigc
2_wt.q.05_peak_32983	chr4	150236307	150238966	Eno1b
2_wt.q.05_peak_42331	chr8	84249339	84250092	D8Ertd738e
2_wt.q.05_peak_14283	chr14	60250386	60250827	Nupl1
2_wt.q.05_peak_16171	chr15	44705904	44706741	Sybu
2_wt.q.05_peak_37649	chr6	108658773	108664400	0610040F04Rik
2_wt.q.05_peak_32925	chr4	148159640	148161155	Fbxo2
2_wt.q.05_peak_31943	chr4	101069094	101070180	Raver2
2_wt.q.05_peak_19456	chr17	8527431	8527784	Pde10a
2_wt.q.05_peak_27247	chr2	150786475	150788144	Pygb
2_wt.q.05_peak_8019	chr11	94326760	94329620	Ankrd40
2_wt.q.05_peak_24575	chr2	30093726	30094555	Zdhhc12
2_wt.q.05_peak_7397	chr11	70015060	70016135	Acadvl
2_wt.q.05_peak_19688	chr17	24849719	24850903	Fahd1
2_wt.q.05_peak_33062	chr4	152476123	152479423	Kcnab2
2_wt.q.05_peak_34598	chr5	96162754	96163073	Cnot6l
2_wt.q.05_peak_22988	chr19	10605306	10606152	Ddb1
2_wt.q.05_peak_29164	chr3	89281425	89282079	Efna1
2_wt.q.05_peak_3703	chr10	11148904	11150528	Shprh
2_wt.q.05_peak_4912	chr10	80114754	80115673	Stk11
2_wt.q.05_peak_31218	chr4	48584441	48584874	Tmeff1
2_wt.q.05_peak_2777	chr1	163994544	163995277	Mettl18
2_wt.q.05_peak_43289	chr9	15357086	15358500	Cep295
2_wt.q.05_peak_3942	chr10	21992491	21993708	Sgk1
2_wt.q.05_peak_35531	chr5	136987038	136987984	Znhit1
2_wt.q.05_peak_8560	chr11	109649562	109651136	Prkar1a
2_wt.q.05_peak_3295	chr1	182341375	182342092	Fbxo28
2_wt.q.05_peak_7553	chr11	76217003	76217890	Gemin4
2_wt.q.05_peak_17958	chr16	20547932	20548847	Gm15760
2_wt.q.05_peak_13797	chr14	27622081	27622762	Erc2
2_wt.q.05_peak_33838	chr5	39644829	39645964	Hs3st1
2_wt.q.05_peak_34434	chr5	81020842	81021552	Adgrl3
2_wt.q.05_peak_17325	chr15	97705864	97706210	Rpap3
2_wt.q.05_peak_17905	chr16	18053066	18053838	Dgcr6
2_wt.q.05_peak_38132	chr6	134829589	134831377	Crebl2
2_wt.q.05_peak_45431	chr9	111270848	111272155	Mlh1
2_wt.q.05_peak_38652	chr7	24133776	24134399	Zfp235
2_wt.q.05_peak_19030	chr16	78300962	78303550	Cxadr
2_wt.q.05_peak_6913	chr11	49712535	49713485	Cnot6
2_wt.q.05_peak_26508	chr2	119787059	119788229	Rpap1
2_wt.q.05_peak_21614	chr18	36348848	36349670	Cystm1
2_wt.q.05_peak_10630	chr12	100185845	100188245	Gm10433
2_wt.q.05_peak_26161	chr2	103760653	103761239	Nat10
2_wt.q.05_peak_14237	chr14	57398463	57398992	Cryl1
2_wt.q.05_peak_23559	chr19	43523551	43525221	Got1
2_wt.q.05_peak_3430	chr1	191905610	191906034	Slc30a1
2_wt.q.05_peak_46151	chrX	103493659	103493988	Jpx
2_wt.q.05_peak_5283	chr10	95323458	95324543	Cradd
2_wt.q.05_peak_6931	chr11	50290439	50293109	Maml1
2_wt.q.05_peak_36151	chr6	28421316	28422308	Gcc1
2_wt.q.05_peak_42077	chr8	70138599	70140082	Rfxank
2_wt.q.05_peak_1422	chr1	82316115	82317034	Rhbdd1
2_wt.q.05_peak_8261	chr11	101467201	101467946	Rnd2
2_wt.q.05_peak_14078	chr14	47297714	47298145	Mapk1ip1l
2_wt.q.05_peak_29835	chr3	123267239	123268208	Sec24d
2_wt.q.05_peak_1128	chr1	64615653	64618289	Mettl21a
2_wt.q.05_peak_45749	chr9	122351798	122352404	Abhd5
2_wt.q.05_peak_25064	chr2	50295787	50297240	Mmadhc
2_wt.q.05_peak_33134	chr5	3595916	3596852	Rbm48
2_wt.q.05_peak_37960	chr6	120835738	120837001	Bcl2l13
2_wt.q.05_peak_8276	chr11	101784957	101785670	Etv4
2_wt.q.05_peak_41587	chr8	40511446	40512212	Vps37a
2_wt.q.05_peak_21495	chr18	33460756	33465530	Nrep
2_wt.q.05_peak_34749	chr5	103211738	103212101	Mapk10
2_wt.q.05_peak_37976	chr6	121183422	121183783	Pex26
2_wt.q.05_peak_37421	chr6	99027139	99028863	Foxp1
2_wt.q.05_peak_35642	chr5	142905573	142907950	Actb
2_wt.q.05_peak_31371	chr4	62286615	62287416	Slc31a2
2_wt.q.05_peak_14221	chr14	55659811	55660648	Mdp1
2_wt.q.05_peak_12335	chr13	73603721	73604259	Clptm1l
2_wt.q.05_peak_20124	chr17	45573345	45574923	Hsp90ab1
2_wt.q.05_peak_18536	chr16	43889225	43890316	Qtrtd1
2_wt.q.05_peak_32089	chr4	106910379	106910926	Ssbp3
2_wt.q.05_peak_19426	chr17	5975327	5977074	Synj2
2_wt.q.05_peak_18229	chr16	32608289	32609240	Tfrc
2_wt.q.05_peak_7497	chr11	74895606	74896589	Sgsm2
2_wt.q.05_peak_15038	chr14	102982735	102983334	Kctd12
2_wt.q.05_peak_32108	chr4	107889568	107890137	0610037L13Rik
2_wt.q.05_peak_29508	chr3	105704242	105707251	Fam212b
2_wt.q.05_peak_44487	chr9	65345612	65346001	Pdcd7
2_wt.q.05_peak_20859	chr17	87025574	87025835	Cript
2_wt.q.05_peak_1709	chr1	98048392	98048902	B230216N24Rik
2_wt.q.05_peak_32420	chr4	126201391	126203539	Thrap3
2_wt.q.05_peak_33497	chr5	23614562	23617462	Srpk2
2_wt.q.05_peak_4570	chr10	63021262	63025288	Hnrnph3
2_wt.q.05_peak_38589	chr7	16875852	16876282	Dact3
2_wt.q.05_peak_19361	chr17	3481785	3482073	Tiam2
2_wt.q.05_peak_25659	chr2	77945569	77946624	Cwc22
2_wt.q.05_peak_11890	chr13	46930006	46931090	Kif13a
2_wt.q.05_peak_11002	chr12	118301167	118302712	Sp4
2_wt.q.05_peak_22921	chr19	7494580	7496138	Atl3
2_wt.q.05_peak_30071	chr3	136669552	136671004	Ppp3ca
2_wt.q.05_peak_9925	chr12	70109386	70112007	Nin
2_wt.q.05_peak_9323	chr12	30584060	30585112	Tmem18
2_wt.q.05_peak_25922	chr2	91921949	91922308	Chrm4
2_wt.q.05_peak_26270	chr2	109692311	109695224	Bdnf
2_wt.q.05_peak_26408	chr2	116064618	116067443	Meis2
2_wt.q.05_peak_22719	chr18	88971484	88971957	Rttn
2_wt.q.05_peak_38373	chr6	146575907	146581483	Fgfr1op2
2_wt.q.05_peak_26302	chr2	110947647	110950898	Ano3
2_wt.q.05_peak_35228	chr5	124112570	124113149	Ogfod2
2_wt.q.05_peak_838	chr1	52232850	52234254	Gls
2_wt.q.05_peak_20440	chr17	66077477	66078363	Ankrd12
2_wt.q.05_peak_46233	chrX	140956339	140957644	Psmd10
2_wt.q.05_peak_36330	chr6	33058980	33060738	Chchd3
2_wt.q.05_peak_27812	chr3	5575520	5576184	Pex2
2_wt.q.05_peak_22170	chr18	61688456	61689215	Il17b
2_wt.q.05_peak_11223	chr13	14062423	14064214	Ggps1
2_wt.q.05_peak_44941	chr9	88437303	88439871	Snx14
2_wt.q.05_peak_38770	chr7	28766102	28767316	Sirt2
2_wt.q.05_peak_14099	chr14	47663718	47664870	Ktn1
2_wt.q.05_peak_32212	chr4	116053498	116053783	Nsun4
2_wt.q.05_peak_42544	chr8	94097813	94099133	Bbs2
2_wt.q.05_peak_21050	chr18	5334159	5334798	Zfp438
2_wt.q.05_peak_13337	chr13	114818271	114818568	Mocs2
2_wt.q.05_peak_6620	chr11	32532739	32533507	Stk10
2_wt.q.05_peak_6097	chr11	4095707	4096618	Mtfp1
2_wt.q.05_peak_15577	chr15	13171207	13174754	Cdh6
2_wt.q.05_peak_12008	chr13	54589301	54591082	Higd2a
2_wt.q.05_peak_2880	chr1	167391781	167394579	Mgst3
2_wt.q.05_peak_40635	chr7	126884511	126885720	Taok2
2_wt.q.05_peak_28675	chr3	68570169	68572700	Schip1
2_wt.q.05_peak_26767	chr2	131159694	131161182	1700037H04Rik
2_wt.q.05_peak_17551	chr16	3908365	3909380	Cluap1
2_wt.q.05_peak_40224	chr7	111122420	111123239	1700012D14Rik
2_wt.q.05_peak_39759	chr7	89632835	89634317	Me3
2_wt.q.05_peak_14051	chr14	45318701	45319312	Ero1l
2_wt.q.05_peak_1708	chr1	98046303	98048106	B230216N24Rik
2_wt.q.05_peak_33698	chr5	33651512	33652650	Slbp
2_wt.q.05_peak_28936	chr3	81932539	81933165	Ctso
2_wt.q.05_peak_16983	chr15	81855793	81860029	Tob2
2_wt.q.05_peak_37032	chr6	81965179	81966459	Mrpl19
2_wt.q.05_peak_8555	chr11	109472368	109473583	Slc16a6
2_wt.q.05_peak_8184	chr11	98808867	98810255	Casc3
2_wt.q.05_peak_1284	chr1	75168428	75169607	Zfand2b
2_wt.q.05_peak_1994	chr1	128359565	128361097	Mcm6
2_wt.q.05_peak_32397	chr4	124881286	124881607	Epha10
2_wt.q.05_peak_31325	chr4	57301313	57302654	Ptpn3
2_wt.q.05_peak_11818	chr13	45507038	45508156	Gmpr
2_wt.q.05_peak_16328	chr15	55089805	55091080	Dscc1
2_wt.q.05_peak_36942	chr6	72413855	72414681	Ggcx
2_wt.q.05_peak_24091	chr2	6927424	6928547	5031426D15Rik
2_wt.q.05_peak_9718	chr12	54655618	54657354	Sptssa
2_wt.q.05_peak_7114	chr11	58330111	58330631	Zfp672
2_wt.q.05_peak_43217	chr9	8004450	8005204	Yap1
2_wt.q.05_peak_8210	chr11	100320017	100321129	Eif1
2_wt.q.05_peak_17799	chr16	13357430	13358656	Mkl2
2_wt.q.05_peak_44951	chr9	89736706	89738701	Ankrd34c
2_wt.q.05_peak_11453	chr13	23745057	23747813	Hist1h2bb
2_wt.q.05_peak_7186	chr11	61174614	61175624	Usp22
2_wt.q.05_peak_39262	chr7	63444991	63446084	Otud7a
2_wt.q.05_peak_11907	chr13	48625321	48625975	Ptpdc1
2_wt.q.05_peak_22181	chr18	62179545	62180776	Adrb2
2_wt.q.05_peak_29948	chr3	127780147	127780838	Alpk1
2_wt.q.05_peak_11448	chr13	23620467	23623444	Hist1h1e
2_wt.q.05_peak_13754	chr14	25457533	25459620	Zmiz1
2_wt.q.05_peak_42839	chr8	110996868	110998496	Ddx19a
2_wt.q.05_peak_44540	chr9	66592772	66593393	Usp3
2_wt.q.05_peak_6338	chr11	21090946	21091560	Peli1
2_wt.q.05_peak_30606	chr4	8535097	8535582	Rab2a
2_wt.q.05_peak_15110	chr14	105497529	105498609	4930449E01Rik
2_wt.q.05_peak_22857	chr19	6235547	6237151	Ppp2r5b
2_wt.q.05_peak_32404	chr4	125085193	125085756	Meaf6
2_wt.q.05_peak_8118	chr11	97840119	97841563	B230217C12Rik
2_wt.q.05_peak_27123	chr2	143914874	143916403	Dstn
2_wt.q.05_peak_20307	chr17	56583774	56585233	Safb2
2_wt.q.05_peak_14079	chr14	47298849	47299560	Mapk1ip1l
2_wt.q.05_peak_41453	chr8	34107724	34109070	Dctn6
2_wt.q.05_peak_33937	chr5	45855123	45858368	Lcorl
2_wt.q.05_peak_3270	chr1	181351940	181352528	Cnih3
2_wt.q.05_peak_19643	chr17	23550406	23551056	6330415G19Rik
2_wt.q.05_peak_44279	chr9	57605029	57605634	Cplx3
2_wt.q.05_peak_727	chr1	44218734	44219451	Mettl21e
2_wt.q.05_peak_19691	chr17	24895166	24895595	Mrps34
2_wt.q.05_peak_38457	chr7	3616980	3618399	Ndufa3
2_wt.q.05_peak_8874	chr12	4037218	4039152	Efr3b
2_wt.q.05_peak_19942	chr17	33809764	33811267	Kank3
2_wt.q.05_peak_45314	chr9	107580420	107581255	Hyal3
2_wt.q.05_peak_8476	chr11	106778734	106780020	Polg2
2_wt.q.05_peak_4802	chr10	75036655	75037107	Rab36
2_wt.q.05_peak_42145	chr8	71950949	71951315	Zfp961
2_wt.q.05_peak_43501	chr9	27154614	27155896	Jam3
2_wt.q.05_peak_34269	chr5	71699691	71701359	Gabrb1
2_wt.q.05_peak_35579	chr5	139214197	139215313	Sun1
2_wt.q.05_peak_41684	chr8	46210770	46211511	Slc25a4
2_wt.q.05_peak_46259	chrX	151343324	151344650	Fam120c
2_wt.q.05_peak_33673	chr5	32854421	32854741	Prr14l
2_wt.q.05_peak_43211	chr9	7763346	7764522	Tmem123
2_wt.q.05_peak_2517	chr1	154726308	154726743	Cacna1e
2_wt.q.05_peak_6944	chr11	50887770	50888087	Zfp454
2_wt.q.05_peak_3950	chr10	22644592	22645217	Slc2a12
2_wt.q.05_peak_19685	chr17	24707164	24708514	Tbl3
2_wt.q.05_peak_19546	chr17	12960419	12961131	Acat2
2_wt.q.05_peak_38952	chr7	43443316	43444312	Etfb
2_wt.q.05_peak_33454	chr5	22549677	22550882	Orc5
2_wt.q.05_peak_20130	chr17	46253467	46254116	Lrrc73
2_wt.q.05_peak_42602	chr8	95807542	95808456	Cnot1
2_wt.q.05_peak_7380	chr11	69670484	69673039	Eif4a1
2_wt.q.05_peak_24664	chr2	32775437	32776103	Ptrh1
2_wt.q.05_peak_28844	chr3	79628519	79629703	4930579G24Rik
2_wt.q.05_peak_3593	chr10	5822731	5825274	Mtrf1l
2_wt.q.05_peak_7625	chr11	78496623	78497034	Sarm1
2_wt.q.05_peak_34909	chr5	112228485	112229460	Miat
2_wt.q.05_peak_38028	chr6	125038356	125040438	Ing4
2_wt.q.05_peak_38134	chr6	134897919	134898813	2810454H06Rik
2_wt.q.05_peak_42414	chr8	85554150	85554827	Dnaja2
2_wt.q.05_peak_45802	chrX	7574400	7575168	Ppp1r3f
2_wt.q.05_peak_3538	chr1	194939240	194939670	Cd34
2_wt.q.05_peak_10628	chr12	100159218	100159692	Nrde2
2_wt.q.05_peak_3199	chr1	178318024	178320759	Cox20
2_wt.q.05_peak_10647	chr12	100276643	100277370	Gm10432
2_wt.q.05_peak_32598	chr4	131872834	131874628	Srsf4
2_wt.q.05_peak_11456	chr13	23760647	23761161	Hist1h4a
2_wt.q.05_peak_29305	chr3	96057465	96058470	Vps45
2_wt.q.05_peak_7541	chr11	75678721	75680148	Crk
2_wt.q.05_peak_38772	chr7	28808788	28811999	Hnrnpl
2_wt.q.05_peak_37362	chr6	94699805	94700955	Lrig1
2_wt.q.05_peak_29171	chr3	89411464	89412465	Flad1
2_wt.q.05_peak_43721	chr9	37208144	37208677	Tmem218
2_wt.q.05_peak_6497	chr11	29171709	29173660	Smek2
2_wt.q.05_peak_34516	chr5	88764473	88765813	Dck
2_wt.q.05_peak_27624	chr2	167062797	167065215	Znfx1
2_wt.q.05_peak_24489	chr2	25983316	25984368	Camsap1
2_wt.q.05_peak_11973	chr13	52979594	52981068	Nfil3
2_wt.q.05_peak_41925	chr8	64731972	64734376	Msmo1
2_wt.q.05_peak_10927	chr12	113014040	113014334	Pacs2
2_wt.q.05_peak_18372	chr16	36874153	36875401	Eaf2
2_wt.q.05_peak_14408	chr14	64415058	64419429	Msra
2_wt.q.05_peak_40852	chr7	140115637	140116620	Echs1
2_wt.q.05_peak_39024	chr7	45395430	45395900	Snrnp70
2_wt.q.05_peak_29825	chr3	122620025	122621004	Fnbp1l
2_wt.q.05_peak_17556	chr16	4077261	4078262	Trap1
2_wt.q.05_peak_26226	chr2	106695838	106696229	Mpped2
2_wt.q.05_peak_31030	chr4	40268098	40270464	Toporsos
2_wt.q.05_peak_38714	chr7	27231972	27233462	Adck4
2_wt.q.05_peak_13542	chr14	16248685	16249861	Ngly1
2_wt.q.05_peak_29491	chr3	104637953	104639818	Slc16a1
2_wt.q.05_peak_42422	chr8	85839803	85841978	Itfg1
2_wt.q.05_peak_18091	chr16	27388121	27388410	Ccdc50
2_wt.q.05_peak_715	chr1	43933197	43933875	Tpp2
2_wt.q.05_peak_6108	chr11	4593532	4595174	Mtmr3
2_wt.q.05_peak_2453	chr1	152750209	152750867	Apobec4
2_wt.q.05_peak_23352	chr19	31663816	31666033	Prkg1
2_wt.q.05_peak_6886	chr11	48816527	48818456	Trim41
2_wt.q.05_peak_40633	chr7	126861957	126862595	Hirip3
2_wt.q.05_peak_9334	chr12	31633973	31634389	Bcap29
2_wt.q.05_peak_18245	chr16	33055637	33057751	Rpl35a
2_wt.q.05_peak_44899	chr9	86467374	86467673	Dopey1
2_wt.q.05_peak_30199	chr3	141463995	141467504	Unc5c
2_wt.q.05_peak_33614	chr5	30907328	30908224	Ost4
2_wt.q.05_peak_6330	chr11	20829992	20830455	Lgalsl
2_wt.q.05_peak_33594	chr5	29735455	29736909	Gm5129
2_wt.q.05_peak_18708	chr16	55973240	55974202	Zbtb11
2_wt.q.05_peak_8532	chr11	108343627	108344236	Prkca
2_wt.q.05_peak_42313	chr8	83699274	83699717	Pkn1
2_wt.q.05_peak_27554	chr2	164785257	164785717	Snx21
2_wt.q.05_peak_33208	chr5	8621518	8623378	Rundc3b
2_wt.q.05_peak_30384	chr3	152668439	152668975	Ak5
2_wt.q.05_peak_15267	chr14	119099547	119100427	Uggt2
2_wt.q.05_peak_621	chr1	39648712	39651756	Creg2
2_wt.q.05_peak_38849	chr7	30588828	30589602	Mir3569
2_wt.q.05_peak_16052	chr15	39796607	39797426	Gm16291
2_wt.q.05_peak_39749	chr7	89516335	89517138	Prss23
2_wt.q.05_peak_11397	chr13	21783483	21784720	Hist1h3i
2_wt.q.05_peak_44887	chr9	85841552	85842159	Tpbg
2_wt.q.05_peak_45115	chr9	100642597	100643736	Stag1
2_wt.q.05_peak_29638	chr3	110143032	110143346	Ntng1
2_wt.q.05_peak_38732	chr7	27552525	27553673	Pld3
2_wt.q.05_peak_1995	chr1	128416751	128417063	Dars
2_wt.q.05_peak_41352	chr8	25840279	25841680	Ash2l
2_wt.q.05_peak_25810	chr2	84826648	84827769	Timm10
2_wt.q.05_peak_21161	chr18	12643207	12644227	Ttc39c
2_wt.q.05_peak_19838	chr17	29007712	29008587	Stk38
2_wt.q.05_peak_28053	chr3	26330834	26332192	Nlgn1
2_wt.q.05_peak_8896	chr12	4842822	4844022	BC068281
2_wt.q.05_peak_39954	chr7	96951154	96951870	Nars2
2_wt.q.05_peak_35936	chr6	12747406	12749666	Thsd7a
2_wt.q.05_peak_7348	chr11	69070328	69071081	Tmem107
2_wt.q.05_peak_15953	chr15	36791097	36792577	Ywhaz
2_wt.q.05_peak_13958	chr14	34673270	34674186	Wapl
2_wt.q.05_peak_28319	chr3	45376840	45379500	2610316D01Rik
2_wt.q.05_peak_29983	chr3	130180329	130181141	Col25a1
2_wt.q.05_peak_41675	chr8	45974513	45976037	1700029J07Rik
2_wt.q.05_peak_38995	chr7	45017246	45018272	Rras
2_wt.q.05_peak_26627	chr2	124609832	124610851	Sema6d
2_wt.q.05_peak_9457	chr12	37880042	37881955	Dgkb
2_wt.q.05_peak_35550	chr5	137745409	137746207	Tsc22d4
2_wt.q.05_peak_23012	chr19	11912695	11913562	Patl1
2_wt.q.05_peak_7425	chr11	71033439	71034085	6330403K07Rik
2_wt.q.05_peak_14836	chr14	79479929	79482941	Wbp4
2_wt.q.05_peak_33603	chr5	30647529	30648336	Mir5625
2_wt.q.05_peak_4656	chr10	67912449	67913584	Zfp365
2_wt.q.05_peak_34820	chr5	107596887	107597541	Rpap2
2_wt.q.05_peak_39149	chr7	54835612	54836085	Luzp2
2_wt.q.05_peak_7529	chr11	75462377	75463359	Mir22
2_wt.q.05_peak_34788	chr5	105699106	105700535	Lrrc8d
2_wt.q.05_peak_29480	chr3	104220415	104221342	Magi3
2_wt.q.05_peak_14583	chr14	70099650	70100515	Bin3
2_wt.q.05_peak_37175	chr6	87980643	87982008	H1fx
2_wt.q.05_peak_35544	chr5	137600100	137601437	Mospd3
2_wt.q.05_peak_44602	chr9	70206948	70207913	Myo1e
2_wt.q.05_peak_16778	chr15	76722296	76722636	Lrrc24
2_wt.q.05_peak_37940	chr6	119902410	119903516	Rad52
2_wt.q.05_peak_31139	chr4	45408857	45409552	Slc25a51
2_wt.q.05_peak_34564	chr5	92083104	92083928	G3bp2
2_wt.q.05_peak_17820	chr16	13903197	13904001	Mpv17l
2_wt.q.05_peak_40070	chr7	100705982	100706977	Fam168a
2_wt.q.05_peak_20160	chr17	47009253	47011157	Ubr2
2_wt.q.05_peak_41535	chr8	36951243	36953152	Dlc1
2_wt.q.05_peak_39256	chr7	61980518	61982296	A330076H08Rik
2_wt.q.05_peak_5498	chr10	107271374	107271887	Lin7a
2_wt.q.05_peak_24586	chr2	30392683	30393018	Dolpp1
2_wt.q.05_peak_4955	chr10	80930115	80930758	Gadd45b
2_wt.q.05_peak_3483	chr1	193128845	193130392	Diexf
2_wt.q.05_peak_6347	chr11	21369449	21372185	Ugp2
2_wt.q.05_peak_15444	chr15	5184914	5186706	Ttc33
2_wt.q.05_peak_7061	chr11	55097205	55098174	Gm2a
2_wt.q.05_peak_3304	chr1	182764458	182766318	Susd4
2_wt.q.05_peak_24333	chr2	18063686	18064135	Mllt10
2_wt.q.05_peak_26679	chr2	127791266	127792645	1500011K16Rik
2_wt.q.05_peak_27144	chr2	144526418	144527764	Dzank1
2_wt.q.05_peak_6408	chr11	24073433	24081479	Bcl11a
2_wt.q.05_peak_10105	chr12	75596635	75597106	Ppp2r5e
2_wt.q.05_peak_38029	chr6	125095757	125096032	Chd4
2_wt.q.05_peak_3205	chr1	178337355	178338151	Hnrnpu
2_wt.q.05_peak_40119	chr7	101969663	101971575	Numa1
2_wt.q.05_peak_3282	chr1	181842025	181842364	Lbr
2_wt.q.05_peak_38769	chr7	28741352	28742498	Sars2
2_wt.q.05_peak_21449	chr18	31633570	31635497	Sap130
2_wt.q.05_peak_22292	chr18	66860168	66860897	Mc4r
2_wt.q.05_peak_849	chr1	52498887	52500185	Nab1
2_wt.q.05_peak_32414	chr4	126058541	126059738	Oscp1
2_wt.q.05_peak_6001	chr10	127521867	127522710	Shmt2
2_wt.q.05_peak_26164	chr2	103797708	103798172	Caprin1
2_wt.q.05_peak_36828	chr6	61179216	61180153	Ccser1
2_wt.q.05_peak_16901	chr15	79690067	79690818	Gtpbp1
2_wt.q.05_peak_22945	chr19	8818867	8820478	Hnrnpul2
2_wt.q.05_peak_22533	chr18	77065941	77066918	Pias2
2_wt.q.05_peak_5701	chr10	111164062	111164691	Osbpl8
2_wt.q.05_peak_26357	chr2	114174724	114175777	Aqr
2_wt.q.05_peak_45968	chrX	50634374	50635372	Firre
2_wt.q.05_peak_45395	chr9	109875121	109875991	Cdc25a
2_wt.q.05_peak_33729	chr5	34525727	34526552	Sh3bp2
2_wt.q.05_peak_1197	chr1	66815608	66818120	Kansl1l
2_wt.q.05_peak_34684	chr5	100037776	100041003	Hnrnpdl
2_wt.q.05_peak_14162	chr14	54253407	54254414	Dad1
2_wt.q.05_peak_19200	chr16	91645831	91647662	Gart
2_wt.q.05_peak_43372	chr9	21760013	21760865	Spc24
2_wt.q.05_peak_31295	chr4	55349109	55349998	Rad23b
2_wt.q.05_peak_40908	chr7	143295197	143296482	Kcnq1ot1
2_wt.q.05_peak_25491	chr2	71054710	71056610	Mettl8
2_wt.q.05_peak_4143	chr10	34297453	34298172	Tspyl4
2_wt.q.05_peak_12332	chr13	73330594	73331252	Mrpl36
2_wt.q.05_peak_33083	chr4	155066225	155067428	Pex10
2_wt.q.05_peak_7390	chr11	69921001	69922501	Eif5a
2_wt.q.05_peak_43168	chr8	128685193	128685618	Itgb1
2_wt.q.05_peak_8554	chr11	109425885	109426480	Amz2
2_wt.q.05_peak_38024	chr6	124965323	124966067	Cops7a
2_wt.q.05_peak_29277	chr3	95588429	95589373	Golph3l
2_wt.q.05_peak_19220	chr16	92466412	92466983	Rcan1
2_wt.q.05_peak_7695	chr11	80141607	80142506	Tefm
2_wt.q.05_peak_29099	chr3	88042827	88043448	Gpatch4
2_wt.q.05_peak_34830	chr5	107987237	107988297	Fam69a
2_wt.q.05_peak_29455	chr3	103171367	103172130	Bcas2
2_wt.q.05_peak_1169	chr1	66321198	66323939	Map2
2_wt.q.05_peak_22886	chr19	7039226	7040334	Stip1
2_wt.q.05_peak_14340	chr14	62760799	62762304	Ints6
2_wt.q.05_peak_29117	chr3	88410196	88410519	Pmf1
2_wt.q.05_peak_19694	chr17	24936248	24937333	Mapk8ip3
2_wt.q.05_peak_30207	chr3	141931284	141932299	Bmpr1b
2_wt.q.05_peak_44501	chr9	65827816	65828129	Zfp609
2_wt.q.05_peak_19436	chr17	6948768	6949476	Rsph3b
2_wt.q.05_peak_42155	chr8	72492960	72493441	Slc35e1
2_wt.q.05_peak_32237	chr4	116807009	116807767	Toe1
2_wt.q.05_peak_40907	chr7	142533193	142533471	Mrpl23
2_wt.q.05_peak_21145	chr18	11840032	11841701	Mir1901
2_wt.q.05_peak_32503	chr4	128609481	128610814	Zscan20
2_wt.q.05_peak_8824	chr11	121038629	121039406	Cd7
2_wt.q.05_peak_44431	chr9	62811415	62812284	Fem1b
2_wt.q.05_peak_11548	chr13	30659646	30660849	Dusp22
2_wt.q.05_peak_15737	chr15	27466825	27468510	Ank
2_wt.q.05_peak_8819	chr11	120713934	120714216	Lrrc45
2_wt.q.05_peak_45755	chr9	122570979	122573967	9530059O14Rik
2_wt.q.05_peak_40051	chr7	100368805	100373249	Ppme1
2_wt.q.05_peak_38613	chr7	18990732	18991780	Mypop
2_wt.q.05_peak_19725	chr17	25808572	25808942	Fbxl16
2_wt.q.05_peak_35551	chr5	137777958	137778601	Ppp1r35
2_wt.q.05_peak_22563	chr18	77714142	77714686	4930465K10Rik
2_wt.q.05_peak_6364	chr11	22512081	22512550	Tmem17
2_wt.q.05_peak_27541	chr2	163994672	163995041	Ywhab
2_wt.q.05_peak_21927	chr18	49755225	49756255	Dtwd2
2_wt.q.05_peak_16376	chr15	58414439	58416505	D15Ertd621e
2_wt.q.05_peak_4545	chr10	61694425	61695357	Tysnd1
2_wt.q.05_peak_36720	chr6	54564084	54567056	Scrn1
2_wt.q.05_peak_24358	chr2	19343886	19345027	4930447M23Rik
2_wt.q.05_peak_2866	chr1	166409350	166410150	Pogk
2_wt.q.05_peak_5099	chr10	88826371	88827096	Utp20
2_wt.q.05_peak_7389	chr11	69914067	69914609	Gps2
2_wt.q.05_peak_41924	chr8	64692510	64693428	Cpe
2_wt.q.05_peak_22276	chr18	65799888	65800725	Sec11c
2_wt.q.05_peak_17117	chr15	89139581	89140348	Mapk12
2_wt.q.05_peak_30947	chr4	33310023	33311061	Rngtt
2_wt.q.05_peak_29222	chr3	93555186	93556120	S100a10
2_wt.q.05_peak_17770	chr16	11909227	11909617	Cpped1
2_wt.q.05_peak_38492	chr7	4924887	4925461	Ssc5d
2_wt.q.05_peak_19380	chr17	4993644	4995319	Arid1b
2_wt.q.05_peak_3943	chr10	21994065	21997057	Sgk1
2_wt.q.05_peak_36867	chr6	66534638	66535172	Mad2l1
2_wt.q.05_peak_7422	chr11	71003337	71005165	Dhx33
2_wt.q.05_peak_36227	chr6	30508733	30510521	Tmem209
2_wt.q.05_peak_36153	chr6	28479463	28480774	Snd1
2_wt.q.05_peak_31694	chr4	83524598	83526276	Ccdc171
2_wt.q.05_peak_36242	chr6	30896929	30897398	Copg2
2_wt.q.05_peak_36372	chr6	35132052	35134507	Cnot4
2_wt.q.05_peak_29115	chr3	88335218	88336519	Smg5
2_wt.q.05_peak_4477	chr10	58445826	58446722	Ranbp2
2_wt.q.05_peak_19604	chr17	17374036	17375127	Riok2
2_wt.q.05_peak_19690	chr17	24885800	24887046	Nubp2
2_wt.q.05_peak_15954	chr15	36794322	36794978	Ywhaz
2_wt.q.05_peak_8234	chr11	100770482	100771230	Ghdc
2_wt.q.05_peak_37932	chr6	119478782	119479507	Fbxl14
2_wt.q.05_peak_22161	chr18	61554742	61555013	Csnk1a1
2_wt.q.05_peak_33516	chr5	24576841	24578098	Abcf2
2_wt.q.05_peak_46214	chrX	136203227	136204131	Tceal5
2_wt.q.05_peak_45655	chr9	119340401	119341459	Acaa1a
2_wt.q.05_peak_36522	chr6	40470908	40472013	Ssbp1
2_wt.q.05_peak_45403	chr9	110117153	110117707	Dhx30
2_wt.q.05_peak_42517	chr8	91312988	91313996	Fto
2_wt.q.05_peak_41069	chr8	11634624	11636436	Mir7238
2_wt.q.05_peak_12149	chr13	59674866	59675770	Golm1
2_wt.q.05_peak_44343	chr9	59481648	59481928	Gm20199
2_wt.q.05_peak_5775	chr10	115383020	115385233	Thap2
2_wt.q.05_peak_23926	chr19	59492517	59492983	2700089I24Rik
2_wt.q.05_peak_31347	chr4	59003633	59004533	Dnajc25
2_wt.q.05_peak_32213	chr4	116073737	116075380	Uqcrh
2_wt.q.05_peak_22838	chr19	5801343	5805819	Malat1
2_wt.q.05_peak_1288	chr1	75217553	75219567	Tuba4a
2_wt.q.05_peak_6977	chr11	52000565	52001167	Ube2b
2_wt.q.05_peak_1912	chr1	124044281	124045399	Dpp10
2_wt.q.05_peak_36868	chr6	66535462	66535838	Mad2l1
2_wt.q.05_peak_38987	chr7	44869997	44870467	Ptov1
2_wt.q.05_peak_36239	chr6	30737871	30738226	Mest
2_wt.q.05_peak_29097	chr3	87929767	87931297	Isg20l2
2_wt.q.05_peak_16490	chr15	64921017	64922508	Adcy8
2_wt.q.05_peak_17851	chr16	16896588	16896897	Ppm1f
2_wt.q.05_peak_30626	chr4	9667477	9669626	Asph
2_wt.q.05_peak_27174	chr2	145933914	145935074	Crnkl1
2_wt.q.05_peak_4779	chr10	72654402	72655575	Zwint
2_wt.q.05_peak_25158	chr2	57181562	57182747	4930555B11Rik
2_wt.q.05_peak_41378	chr8	27128085	27128649	Brf2
2_wt.q.05_peak_46198	chrX	133688311	133689358	Pcdh19
2_wt.q.05_peak_35924	chr6	11906958	11908413	Ndufa4
2_wt.q.05_peak_32067	chr4	105110074	105110525	Prkaa2
2_wt.q.05_peak_35716	chr5	146232159	146233028	Cdk8
2_wt.q.05_peak_19368	chr17	3556993	3558529	Tfb1m
2_wt.q.05_peak_10777	chr12	105784739	105785509	Papola
2_wt.q.05_peak_2454	chr1	152763859	152768664	Arpc5
2_wt.q.05_peak_39042	chr7	45717740	45718625	Rpl18
2_wt.q.05_peak_7386	chr11	69837817	69838915	Tmem256
2_wt.q.05_peak_23882	chr19	57452464	57453449	Trub1
2_wt.q.05_peak_24773	chr2	35978389	35979695	Ttll11
2_wt.q.05_peak_318	chr1	24678440	24678738	Lmbrd1
2_wt.q.05_peak_41871	chr8	60631323	60634319	Mfap3l
2_wt.q.05_peak_29112	chr3	88296302	88298071	Cct3
2_wt.q.05_peak_19840	chr17	29031670	29034872	Srsf3
2_wt.q.05_peak_41884	chr8	60992271	60994255	Nek1
2_wt.q.05_peak_9327	chr12	31498998	31500188	Cbll1
2_wt.q.05_peak_16793	chr15	76948220	76948739	1110038F14Rik
2_wt.q.05_peak_7626	chr11	78497511	78498268	Sarm1
2_wt.q.05_peak_4918	chr10	80172974	80173893	1600002K03Rik
2_wt.q.05_peak_39997	chr7	98655200	98657522	Emsy
2_wt.q.05_peak_32685	chr4	134395589	134396773	Pafah2
2_wt.q.05_peak_4575	chr10	63243224	63243621	Herc4
2_wt.q.05_peak_22790	chr19	4838968	4839614	Ccs
2_wt.q.05_peak_45921	chrX	38634627	38635246	C1galt1c1
2_wt.q.05_peak_24483	chr2	25863107	25863368	Kcnt1
2_wt.q.05_peak_12045	chr13	55444252	55444859	Grk6
2_wt.q.05_peak_19760	chr17	26506945	26509664	Dusp1
2_wt.q.05_peak_16679	chr15	72808568	72810935	Peg13
2_wt.q.05_peak_34701	chr5	100674508	100674851	Coq2
2_wt.q.05_peak_1641	chr1	93478036	93479166	Hdlbp
2_wt.q.05_peak_19814	chr17	28232299	28233284	Ppard
2_wt.q.05_peak_33620	chr5	31048045	31048566	Slc5a6
2_wt.q.05_peak_25355	chr2	65929145	65934818	Csrnp3
2_wt.q.05_peak_38887	chr7	35585837	35586680	Ankrd27
2_wt.q.05_peak_33736	chr5	34636259	34637204	Mfsd10
2_wt.q.05_peak_21629	chr18	37020092	37021046	Pcdha12
2_wt.q.05_peak_23655	chr19	46348188	46349654	2310034G01Rik
2_wt.q.05_peak_7475	chr11	73198451	73199375	Ctns
2_wt.q.05_peak_24019	chr2	5844737	5846040	Nudt5
2_wt.q.05_peak_2950	chr1	169968903	169969957	3110045C21Rik
2_wt.q.05_peak_7254	chr11	65162761	65163417	Arhgap44
2_wt.q.05_peak_11450	chr13	23697645	23698820	Hist1h4c
2_wt.q.05_peak_38559	chr7	16273128	16273986	Inafm1
2_wt.q.05_peak_38999	chr7	45062303	45063104	Nosip
2_wt.q.05_peak_42260	chr8	79711103	79712315	Abce1
2_wt.q.05_peak_17432	chr15	100227238	100227642	Atf1
2_wt.q.05_peak_35108	chr5	121397349	121398900	Naa25
2_wt.q.05_peak_40039	chr7	100159086	100160098	Lipt2
2_wt.q.05_peak_41111	chr8	14089665	14091104	Erich1
2_wt.q.05_peak_42822	chr8	110217376	110218492	Cmtr2
2_wt.q.05_peak_99	chr1	11413378	11416192	A830018L16Rik
2_wt.q.05_peak_34534	chr5	89882749	89883218	Adamts3
2_wt.q.05_peak_35847	chr6	4086547	4087334	Bet1
2_wt.q.05_peak_41247	chr8	18845632	18846798	Agpat5
2_wt.q.05_peak_32576	chr4	130663398	130665263	Pum1
2_wt.q.05_peak_40129	chr7	102686773	102687598	Trim68
2_wt.q.05_peak_25776	chr2	83811527	83813049	Fam171b
2_wt.q.05_peak_33509	chr5	24100053	24101953	Klhl7
2_wt.q.05_peak_43787	chr9	40268942	40270538	Scn3b
2_wt.q.05_peak_18399	chr16	37538460	37540381	Gtf2e1
2_wt.q.05_peak_38533	chr7	13054095	13055189	Mzf1
2_wt.q.05_peak_9838	chr12	65172653	65173358	Mis18bp1
2_wt.q.05_peak_42124	chr8	71396421	71397393	Babam1
2_wt.q.05_peak_14311	chr14	61359706	61361161	Ebpl
2_wt.q.05_peak_21021	chr18	3336506	3336906	Gm6225
2_wt.q.05_peak_8694	chr11	116432269	116434738	Ubald2
2_wt.q.05_peak_8836	chr11	121386988	121388938	Rab40b
2_wt.q.05_peak_10194	chr12	80462828	80464486	Exd2
2_wt.q.05_peak_37034	chr6	82652644	82653550	Pole4
2_wt.q.05_peak_44997	chr9	94534215	94540880	1190002N15Rik
2_wt.q.05_peak_45887	chrX	20616514	20618633	Ndufb11
2_wt.q.05_peak_15552	chr15	12320709	12321308	Golph3
2_wt.q.05_peak_10300	chr12	83687841	83689164	Psen1
2_wt.q.05_peak_6549	chr11	30648539	30649290	Acyp2
2_wt.q.05_peak_1362	chr1	78488894	78489526	Farsb
2_wt.q.05_peak_43875	chr9	42123443	42123889	Sorl1
2_wt.q.05_peak_1238	chr1	72306968	72307885	Xrcc5
2_wt.q.05_peak_6064	chr11	3289698	3290789	Patz1
2_wt.q.05_peak_12236	chr13	67420873	67421602	Zfp459
2_wt.q.05_peak_17366	chr15	98951689	98955638	Tuba1a
2_wt.q.05_peak_46229	chrX	139684437	139685432	Tbc1d8b
2_wt.q.05_peak_17002	chr15	82244465	82244747	Cenpm
2_wt.q.05_peak_32356	chr4	123410432	123413872	D830031N03Rik
2_wt.q.05_peak_38753	chr7	27928876	27929800	1700049G17Rik
2_wt.q.05_peak_41550	chr8	39005310	39006822	Tusc3
2_wt.q.05_peak_35270	chr5	124578659	124580037	Gtf2h3
2_wt.q.05_peak_44400	chr9	62122383	62123347	Mir5133
2_wt.q.05_peak_16774	chr15	76659458	76660522	Cyhr1
2_wt.q.05_peak_19998	chr17	35666350	35666860	Vars2
2_wt.q.05_peak_8545	chr11	108920124	108920823	Axin2
2_wt.q.05_peak_16738	chr15	74672745	74674036	Arc
2_wt.q.05_peak_21681	chr18	38418595	38419214	Ndfip1
2_wt.q.05_peak_45244	chr9	106280576	106281334	Poc1a
2_wt.q.05_peak_5808	chr10	117063976	117064270	Cct2
2_wt.q.05_peak_5774	chr10	115361811	115363386	Tmem19
2_wt.q.05_peak_38481	chr7	4792438	4793150	Rpl28
2_wt.q.05_peak_19680	chr17	24550126	24550840	Pkd1
2_wt.q.05_peak_39549	chr7	79465402	79467702	Polg
2_wt.q.05_peak_32958	chr4	149426510	149427307	Ube4b
2_wt.q.05_peak_4464	chr10	58322979	58324741	Lims1
2_wt.q.05_peak_7312	chr11	67922384	67922922	Usp43
2_wt.q.05_peak_20315	chr17	56989684	56990816	Clpp
2_wt.q.05_peak_10737	chr12	102742837	102744569	Moap1
2_wt.q.05_peak_44217	chr9	55209047	55209332	Fbxo22
2_wt.q.05_peak_32547	chr4	129640233	129642163	Txlna
2_wt.q.05_peak_8814	chr11	120624241	120624995	Mir6936
2_wt.q.05_peak_36795	chr6	58830739	58835157	Herc3
2_wt.q.05_peak_1500	chr1	86021064	86021953	Spata3
2_wt.q.05_peak_38591	chr7	16923158	16923823	Calm3
2_wt.q.05_peak_26208	chr2	104711010	104711844	Tcp11l1
2_wt.q.05_peak_19586	chr17	15395924	15396746	Fam120b
2_wt.q.05_peak_40058	chr7	100582684	100583116	Mrpl48
2_wt.q.05_peak_40909	chr7	143548133	143549647	Nap1l4
2_wt.q.05_peak_19190	chr16	91042967	91045218	Paxbp1
2_wt.q.05_peak_33037	chr4	151989121	151989615	Thap3
2_wt.q.05_peak_32792	chr4	138250103	138251334	Sh2d5
2_wt.q.05_peak_22732	chr18	89769696	89770125	Dok6
2_wt.q.05_peak_32230	chr4	116626561	116628386	Nasp
2_wt.q.05_peak_8124	chr11	97884292	97884592	Fbxo47
2_wt.q.05_peak_4551	chr10	62449219	62450352	Supv3l1
2_wt.q.05_peak_6958	chr11	51584821	51585369	Phykpl
2_wt.q.05_peak_44683	chr9	72985505	72986305	Ccpg1
2_wt.q.05_peak_29844	chr3	123506979	123509447	Snhg8
2_wt.q.05_peak_33814	chr5	38220070	38220739	Zbtb49
2_wt.q.05_peak_21268	chr18	20896433	20896934	Trappc8
2_wt.q.05_peak_1031	chr1	59912097	59913351	Fam117b
2_wt.q.05_peak_23790	chr19	53527603	53529261	Dusp5
2_wt.q.05_peak_35076	chr5	120588336	120589306	Iqcd
2_wt.q.05_peak_5390	chr10	99260821	99263973	Dusp6
2_wt.q.05_peak_36780	chr6	57533259	57536309	Ppm1k
2_wt.q.05_peak_36367	chr6	34910191	34911295	Wdr91
2_wt.q.05_peak_30000	chr3	132683495	132684074	Aimp1
2_wt.q.05_peak_17883	chr16	17404875	17407136	Snap29
2_wt.q.05_peak_22794	chr19	4942842	4943167	Peli3
2_wt.q.05_peak_34324	chr5	73490651	73491241	Dcun1d4
2_wt.q.05_peak_3395	chr1	190910165	190912022	Rps6kc1
2_wt.q.05_peak_6062	chr11	3266173	3267235	Drg1
2_wt.q.05_peak_45816	chrX	8192078	8193774	Ebp
2_wt.q.05_peak_27841	chr3	8922378	8924334	Mrps28
2_wt.q.05_peak_22892	chr19	7205545	7206677	Otub1
2_wt.q.05_peak_18037	chr16	23107878	23109582	Snord2
2_wt.q.05_peak_17859	chr16	16983694	16985037	Mapk1
2_wt.q.05_peak_42703	chr8	104533803	104534901	Nae1
2_wt.q.05_peak_23400	chr19	34921775	34922249	Kif20b
2_wt.q.05_peak_29617	chr3	108721364	108722785	Gpsm2
2_wt.q.05_peak_28713	chr3	69125569	69127755	Kpna4
2_wt.q.05_peak_44885	chr9	85748234	85750004	Ibtk
2_wt.q.05_peak_4906	chr10	79908369	79908899	Med16
2_wt.q.05_peak_8663	chr11	115563676	115564530	Nup85
2_wt.q.05_peak_42087	chr8	70352794	70355115	Upf1
2_wt.q.05_peak_40899	chr7	141902224	141903555	Tollip
2_wt.q.05_peak_14411	chr14	64440017	64441278	Msra
2_wt.q.05_peak_30542	chr4	3936235	3939288	Plag1
2_wt.q.05_peak_39539	chr7	79272404	79275602	Abhd2
2_wt.q.05_peak_40660	chr7	127470228	127472471	Prr14
2_wt.q.05_peak_7178	chr11	60776746	60777883	Top3a
2_wt.q.05_peak_15337	chr14	120910372	120910909	Ipo5
2_wt.q.05_peak_3874	chr10	19933370	19934505	Map3k5
2_wt.q.05_peak_37977	chr6	121184060	121184542	Pex26
2_wt.q.05_peak_34996	chr5	115564281	115564604	Gcn1l1
2_wt.q.05_peak_7409	chr11	70668184	70669590	Spag7
2_wt.q.05_peak_27314	chr2	154372499	154373128	Cdk5rap1
2_wt.q.05_peak_21690	chr18	38992551	38992868	Arhgap26
2_wt.q.05_peak_24551	chr2	29252898	29253443	6530402F18Rik
2_wt.q.05_peak_8215	chr11	100397370	100398303	Jup
2_wt.q.05_peak_12989	chr13	100015049	100016195	Mccc2
2_wt.q.05_peak_25514	chr2	71872552	71874520	Pdk1
2_wt.q.05_peak_2838	chr1	165633335	165634733	Mpzl1
2_wt.q.05_peak_14771	chr14	77156054	77156789	Enox1
2_wt.q.05_peak_36792	chr6	57824021	57824429	Vopp1
2_wt.q.05_peak_29777	chr3	120885904	120887407	6530403H02Rik
2_wt.q.05_peak_16744	chr15	74954650	74955642	Ly6e
2_wt.q.05_peak_4931	chr10	80399126	80400364	Mbd3
2_wt.q.05_peak_4387	chr10	52417379	52418496	Nus1
2_wt.q.05_peak_2094	chr1	133025452	133025794	Mdm4
2_wt.q.05_peak_22512	chr18	74999810	75001575	Rpl17
2_wt.q.05_peak_40887	chr7	141437054	141437902	Slc25a22
2_wt.q.05_peak_33018	chr4	150909424	150909879	Park7
2_wt.q.05_peak_44263	chr9	57130330	57131826	Man2c1os
2_wt.q.05_peak_4548	chr10	62339208	62340920	Hk1
2_wt.q.05_peak_45997	chrX	66652181	66653490	Slitrk2
2_wt.q.05_peak_36766	chr6	56796486	56798292	Kbtbd2
2_wt.q.05_peak_5987	chr10	127288001	127292169	Ddit3
2_wt.q.05_peak_17006	chr15	82345790	82346942	Smdt1
2_wt.q.05_peak_69	chr1	9748106	9748414	Vcpip1
2_wt.q.05_peak_25693	chr2	79454751	79457335	Neurod1
2_wt.q.05_peak_38928	chr7	39517492	39517967	Zfp619
2_wt.q.05_peak_3326	chr1	184844887	184846960	2022-03-02
2_wt.q.05_peak_15758	chr15	27630068	27631132	Otulin
2_wt.q.05_peak_6813	chr11	43747492	43748617	Ttc1
2_wt.q.05_peak_4872	chr10	77978149	77979068	1810043G02Rik
2_wt.q.05_peak_23476	chr19	38263476	38266274	Lgi1
2_wt.q.05_peak_35825	chr5	150594537	150595042	N4bp2l1
2_wt.q.05_peak_39766	chr7	89979917	89981683	Eed
2_wt.q.05_peak_25098	chr2	52741015	52742878	Stam2
2_wt.q.05_peak_4863	chr10	77581769	77582648	Pttg1ip
2_wt.q.05_peak_36672	chr6	51523834	51524367	Snx10
2_wt.q.05_peak_11425	chr13	23430398	23433536	C230035I16Rik
2_wt.q.05_peak_19649	chr17	23770359	23772116	Flywch1
2_wt.q.05_peak_23293	chr19	28009158	28012493	Rfx3
2_wt.q.05_peak_19724	chr17	25791856	25792349	Fam173a
2_wt.q.05_peak_36889	chr6	70843917	70844542	Eif2ak3
2_wt.q.05_peak_11894	chr13	47147689	47148816	A930002C04Rik
2_wt.q.05_peak_36388	chr6	36387764	36388561	9330158H04Rik
2_wt.q.05_peak_19606	chr17	17402677	17403564	Lix1
2_wt.q.05_peak_9675	chr12	51692072	51692919	Strn3
2_wt.q.05_peak_22305	chr18	67463711	67464710	Slmo1
2_wt.q.05_peak_39029	chr7	45509832	45510982	Nucb1
2_wt.q.05_peak_3412	chr1	191396745	191398252	Ppp2r5a
2_wt.q.05_peak_35765	chr5	148398741	148400182	Slc7a1
2_wt.q.05_peak_20145	chr17	46645381	46646465	Mrpl2
2_wt.q.05_peak_3076	chr1	174501538	174503144	Fmn2
2_wt.q.05_peak_19995	chr17	35516636	35517470	Cchcr1
2_wt.q.05_peak_33978	chr5	50058009	50058337	Adgra3
2_wt.q.05_peak_16006	chr15	38078086	38079585	Ubr5
2_wt.q.05_peak_8073	chr11	97188195	97189028	Kpnb1
2_wt.q.05_peak_9608	chr12	49480171	49481457	1810007C17Rik
2_wt.q.05_peak_27571	chr2	165286673	165289506	Slc35c2
2_wt.q.05_peak_40410	chr7	118242465	118244297	Smg1
2_wt.q.05_peak_42033	chr8	68793215	68794377	Ints10
2_wt.q.05_peak_23878	chr19	57359569	57360942	B230217O12Rik
2_wt.q.05_peak_42405	chr8	85431643	85433609	4921524J17Rik
2_wt.q.05_peak_38227	chr6	136874936	136875801	Mgp
2_wt.q.05_peak_2342	chr1	144002361	144005245	Rgs2
2_wt.q.05_peak_39038	chr7	45703917	45705930	Dbp
2_wt.q.05_peak_30683	chr4	13750493	13751153	Runx1t1
2_wt.q.05_peak_28108	chr3	30792658	30793530	Sec62
2_wt.q.05_peak_40680	chr7	127912307	127912810	Kat8
2_wt.q.05_peak_20351	chr17	62881554	62882428	Efna5
2_wt.q.05_peak_25807	chr2	84733279	84735201	Ypel4
2_wt.q.05_peak_7344	chr11	69059248	69059951	Borcs6
2_wt.q.05_peak_44351	chr9	59577631	59578401	Celf6
2_wt.q.05_peak_21653	chr18	37934894	37935409	Diaph1
2_wt.q.05_peak_39170	chr7	56018857	56019331	Nipa1
2_wt.q.05_peak_17150	chr15	90678700	90679328	Cpne8
2_wt.q.05_peak_30569	chr4	6190324	6191693	Ubxn2b
2_wt.q.05_peak_8225	chr11	100622403	100623388	Nkiras2
2_wt.q.05_peak_23528	chr19	41932694	41934056	Exosc1
2_wt.q.05_peak_24829	chr2	39065016	39066192	Golga1
2_wt.q.05_peak_34537	chr5	90223279	90224426	Cox18
2_wt.q.05_peak_38654	chr7	24207841	24208168	Zfp111
2_wt.q.05_peak_12337	chr13	73937854	73938135	Brd9
2_wt.q.05_peak_21313	chr18	23497084	23497748	Dtna
2_wt.q.05_peak_4564	chr10	62920141	62921061	Slc25a16
2_wt.q.05_peak_39553	chr7	79504516	79505262	Mir9-3
2_wt.q.05_peak_6321	chr11	20331925	20333383	Slc1a4
2_wt.q.05_peak_19531	chr17	12316042	12319671	Map3k4
2_wt.q.05_peak_29675	chr3	116593820	116594857	Sass6
2_wt.q.05_peak_25950	chr2	92387859	92388766	Mir7000
2_wt.q.05_peak_28177	chr3	33799122	33800798	Ttc14
2_wt.q.05_peak_17228	chr15	93596021	93597422	Prickle1
2_wt.q.05_peak_34865	chr5	110230657	110231475	Ankle2
2_wt.q.05_peak_4463	chr10	58255092	58256274	Gcc2
2_wt.q.05_peak_12061	chr13	55622697	55623504	Caml
2_wt.q.05_peak_14064	chr14	45658238	45658897	Ddhd1
2_wt.q.05_peak_44660	chr9	72531228	72531927	4930509E16Rik
2_wt.q.05_peak_21511	chr18	34330710	34331299	Srp19
2_wt.q.05_peak_43487	chr9	26734459	26735040	B3gat1
2_wt.q.05_peak_29127	chr3	88501285	88503748	Lmna
2_wt.q.05_peak_36875	chr6	67265948	67269690	Serbp1
2_wt.q.05_peak_46407	chrX	168673342	168673735	Msl3
2_wt.q.05_peak_33024	chr4	151044159	151046093	Per3
2_wt.q.05_peak_41356	chr8	26014853	26015850	Fnta
2_wt.q.05_peak_15039	chr14	103069982	103071549	Cln5
2_wt.q.05_peak_45676	chr9	120303126	120303726	Myrip
2_wt.q.05_peak_12462	chr13	81709977	81712578	Mblac2
2_wt.q.05_peak_7272	chr11	66168011	66168824	Dnah9
2_wt.q.05_peak_16468	chr15	64312705	64313406	Asap1
2_wt.q.05_peak_38480	chr7	4739498	4740103	Suv420h2
2_wt.q.05_peak_4826	chr10	75921212	75921872	Smarcb1
2_wt.q.05_peak_20318	chr17	57031688	57032141	Khsrp
2_wt.q.05_peak_12066	chr13	55727800	55728389	Pcbd2
2_wt.q.05_peak_32863	chr4	140960721	140961183	Sdhb
2_wt.q.05_peak_3053	chr1	172297819	172298320	Atp1a2
2_wt.q.05_peak_9721	chr12	54794721	54795176	Snx6
2_wt.q.05_peak_13420	chr14	8214737	8216709	Kctd6
2_wt.q.05_peak_33118	chr4	155704631	155705205	Ssu72
2_wt.q.05_peak_5192	chr10	91170009	91171565	Tmpo
2_wt.q.05_peak_42566	chr8	94601052	94601786	Fam192a
2_wt.q.05_peak_7760	chr11	83291512	83292544	AA465934
2_wt.q.05_peak_32626	chr4	132638303	132638999	Eya3
2_wt.q.05_peak_7172	chr11	60416710	60417618	Gid4
2_wt.q.05_peak_31118	chr4	44168305	44169486	Rnf38
2_wt.q.05_peak_8017	chr11	94320890	94323058	Luc7l3
2_wt.q.05_peak_41537	chr8	36993281	36994500	AI429214
2_wt.q.05_peak_19211	chr16	92057711	92058216	Slc5a3
2_wt.q.05_peak_13455	chr14	11553222	11554976	Ptprg
2_wt.q.05_peak_44087	chr9	50603263	50604401	Sdhd
2_wt.q.05_peak_22982	chr19	10457827	10458247	Lrrc10b
2_wt.q.05_peak_28843	chr3	79627715	79628212	Etfdh
2_wt.q.05_peak_40080	chr7	100932014	100933132	Arhgef17
2_wt.q.05_peak_31287	chr4	54945800	54950209	Zfp462
2_wt.q.05_peak_40180	chr7	109518340	109518958	Rpl27a
2_wt.q.05_peak_10466	chr12	89812178	89812782	Nrxn3
2_wt.q.05_peak_6839	chr11	46055833	46056648	Adam19
2_wt.q.05_peak_16843	chr15	78117297	78119444	Cacng2
2_wt.q.05_peak_531	chr1	37368065	37369086	Inpp4a
2_wt.q.05_peak_11608	chr13	36117398	36118771	Fars2
2_wt.q.05_peak_17969	chr16	20716271	20718575	Polr2h
2_wt.q.05_peak_19233	chr16	93831727	93833324	Morc3
2_wt.q.05_peak_294	chr1	24005054	24005636	Sdhaf4
2_wt.q.05_peak_35741	chr5	147075284	147078174	Lnx2
2_wt.q.05_peak_35283	chr5	125177897	125180415	Ncor2
2_wt.q.05_peak_14134	chr14	50923900	50925754	Osgep
2_wt.q.05_peak_12707	chr13	92609537	92611544	Serinc5
2_wt.q.05_peak_41362	chr8	26157320	26158639	Thap1
2_wt.q.05_peak_20903	chr17	88529661	88530362	Ppp1r21
2_wt.q.05_peak_37085	chr6	85333010	85334038	Sfxn5
2_wt.q.05_peak_10110	chr12	75735839	75736958	Sgpp1
2_wt.q.05_peak_32365	chr4	123616731	123617376	Mir6398
2_wt.q.05_peak_46160	chrX	104482792	104483814	Uprt
2_wt.q.05_peak_8256	chr11	101315569	101316093	Psme3
2_wt.q.05_peak_5135	chr10	90576019	90578709	Anks1b
2_wt.q.05_peak_35384	chr5	129895329	129896019	Zbed5
2_wt.q.05_peak_19298	chr16	95990472	95991271	Psmg1
2_wt.q.05_peak_3724	chr10	12921643	12923286	B230208H11Rik
2_wt.q.05_peak_42736	chr8	105860163	105860925	Nutf2
2_wt.q.05_peak_27591	chr2	165883245	165884845	Zmynd8
2_wt.q.05_peak_38997	chr7	45053565	45054192	Prr12
2_wt.q.05_peak_3087	chr1	174921547	174922058	Grem2
2_wt.q.05_peak_6394	chr11	23664730	23665628	Pus10
2_wt.q.05_peak_4340	chr10	45066258	45068192	Prep
2_wt.q.05_peak_39261	chr7	63443313	63444297	4930554H23Rik
2_wt.q.05_peak_8198	chr11	99230878	99231445	Smarce1
2_wt.q.05_peak_10120	chr12	76368313	76369415	Zbtb25
2_wt.q.05_peak_11391	chr13	21734069	21734806	Hist1h4j
2_wt.q.05_peak_5907	chr10	122982473	122988468	Mirlet7i
2_wt.q.05_peak_13883	chr14	30352223	30352942	Cacna1d
2_wt.q.05_peak_17502	chr15	102202835	102203540	Zfp740
2_wt.q.05_peak_12648	chr13	90088677	90090025	Xrcc4
2_wt.q.05_peak_25330	chr2	65566457	65567881	Scn3a
2_wt.q.05_peak_45958	chrX	48513129	48514141	Aifm1
2_wt.q.05_peak_35714	chr5	146220766	146221668	Rnf6
2_wt.q.05_peak_45057	chr9	96729808	96733704	Zbtb38
2_wt.q.05_peak_26567	chr2	121288491	121290234	Map1a
2_wt.q.05_peak_39080	chr7	48958710	48959368	Nav2
2_wt.q.05_peak_32675	chr4	134102592	134103044	Ubxn11
2_wt.q.05_peak_15515	chr15	11905897	11907403	Gm5144
2_wt.q.05_peak_42072	chr8	69903147	69903812	Ndufa13
2_wt.q.05_peak_26266	chr2	109673710	109675559	Bdnf
2_wt.q.05_peak_38230	chr6	137252328	137253033	Ptpro
2_wt.q.05_peak_12993	chr13	100492129	100492575	Gtf2h2
2_wt.q.05_peak_22513	chr18	75005172	75006331	BC031181
2_wt.q.05_peak_11042	chr13	3892477	3893838	Net1
2_wt.q.05_peak_20140	chr17	46553017	46553355	Mir6976
2_wt.q.05_peak_35537	chr5	137287300	137287819	Ache
2_wt.q.05_peak_44824	chr9	81631386	81632084	D430036J16Rik
2_wt.q.05_peak_10867	chr12	110888086	110890310	Cinp
2_wt.q.05_peak_42042	chr8	69088058	69091322	Slc18a1
2_wt.q.05_peak_36750	chr6	55683391	55684012	Gm3279
2_wt.q.05_peak_44407	chr9	62340074	62343212	Anp32a
2_wt.q.05_peak_45394	chr9	109832590	109833093	Nme6
2_wt.q.05_peak_15246	chr14	118137640	118137940	Gpr180
2_wt.q.05_peak_46164	chrX	105119406	105120227	Magee1
2_wt.q.05_peak_18224	chr16	32332697	32333675	Ubxn7
2_wt.q.05_peak_38528	chr7	12977395	12978196	Zfp446
2_wt.q.05_peak_13080	chr13	103919081	103920380	Erbb2ip
2_wt.q.05_peak_35212	chr5	123748141	123750149	Rsrc2
2_wt.q.05_peak_31854	chr4	94602325	94603475	Plaa
2_wt.q.05_peak_43850	chr9	41579068	41585176	Mir125b-1
2_wt.q.05_peak_11525	chr13	29014729	29017310	A330102I10Rik
2_wt.q.05_peak_29319	chr3	96240504	96241143	Hist2h2aa2
2_wt.q.05_peak_34864	chr5	110176091	110177157	Golga3
2_wt.q.05_peak_32921	chr4	148040942	148042682	Mthfr
2_wt.q.05_peak_14594	chr14	70519265	70519682	Bmp1
2_wt.q.05_peak_18441	chr16	38522263	38523840	Timmdc1
2_wt.q.05_peak_14413	chr14	64455047	64456382	Msra
2_wt.q.05_peak_22942	chr19	8797831	8799093	Polr2g
2_wt.q.05_peak_38501	chr7	6171032	6172957	Zfp444
2_wt.q.05_peak_42775	chr8	107030995	107031378	Vps4a
2_wt.q.05_peak_7924	chr11	88954627	88955695	Scpep1
2_wt.q.05_peak_26320	chr2	112367741	112368853	Emc4
2_wt.q.05_peak_32268	chr4	119232316	119233422	P3h1
2_wt.q.05_peak_14059	chr14	45530302	45530840	Fermt2
2_wt.q.05_peak_7215	chr11	62280578	62281384	Zswim7
2_wt.q.05_peak_17667	chr16	8636806	8638327	Tmem186
2_wt.q.05_peak_21053	chr18	5591161	5591702	Zeb1
2_wt.q.05_peak_1798	chr1	106758308	106761215	Kdsr
2_wt.q.05_peak_3911	chr10	21296034	21296565	Hbs1l
2_wt.q.05_peak_3734	chr10	13553212	13553781	Pex3
2_wt.q.05_peak_19180	chr16	90809792	90810481	Urb1
2_wt.q.05_peak_10200	chr12	80790003	80792420	Susd6
2_wt.q.05_peak_7069	chr11	55468305	55469605	G3bp1
2_wt.q.05_peak_42420	chr8	85701353	85701627	Mir8109
2_wt.q.05_peak_29320	chr3	96245057	96245424	Hist2h2aa2
2_wt.q.05_peak_42878	chr8	111933336	111934339	Tmem231
2_wt.q.05_peak_36363	chr6	34780088	34780514	Agbl3
2_wt.q.05_peak_27223	chr2	148732005	148733432	Napb
2_wt.q.05_peak_42750	chr8	106209692	106211443	Slc7a6os
2_wt.q.05_peak_29238	chr3	94582017	94583381	Snx27
2_wt.q.05_peak_3631	chr10	7792276	7793385	Ppil4
2_wt.q.05_peak_39908	chr7	92741014	92742933	Rab30
2_wt.q.05_peak_9371	chr12	32819579	32820099	Nampt
2_wt.q.05_peak_35167	chr5	122820632	122821714	Anapc5
2_wt.q.05_peak_6708	chr11	40754414	40755944	Ccng1
2_wt.q.05_peak_21321	chr18	23752868	23754801	Mapre2
2_wt.q.05_peak_12991	chr13	100107571	100108208	Serf1
2_wt.q.05_peak_19979	chr17	34959312	34960078	Hspa1b
2_wt.q.05_peak_29684	chr3	116965909	116968928	4930455H04Rik
2_wt.q.05_peak_32788	chr4	138217188	138217603	Hp1bp3
2_wt.q.05_peak_9053	chr12	12940277	12942552	Mycn
2_wt.q.05_peak_27024	chr2	140394976	140395800	Macrod2
2_wt.q.05_peak_42804	chr8	109606687	109608979	Dhodh
2_wt.q.05_peak_3113	chr1	175880266	175880756	Exo1
2_wt.q.05_peak_42629	chr8	99415927	99416915	Cdh8
2_wt.q.05_peak_37514	chr6	103511108	103511895	Chl1
2_wt.q.05_peak_31394	chr4	65604509	65605382	Trim32
2_wt.q.05_peak_31939	chr4	99828645	99830112	Efcab7
2_wt.q.05_peak_46032	chrX	73715730	73716507	Bcap31
2_wt.q.05_peak_42551	chr8	94213968	94215422	Nup93
2_wt.q.05_peak_8082	chr11	97315911	97316640	Mrpl45
2_wt.q.05_peak_35163	chr5	122779210	122780021	Camkk2
2_wt.q.05_peak_46053	chrX	75874820	75875480	Pls3
2_wt.q.05_peak_38129	chr6	134791364	134791954	Dusp16
2_wt.q.05_peak_14144	chr14	51884906	51885347	Mettl17
2_wt.q.05_peak_4769	chr10	71347083	71348069	Ipmk
2_wt.q.05_peak_32142	chr4	109342550	109344605	Eps15
2_wt.q.05_peak_8681	chr11	116030012	116030493	Unk
2_wt.q.05_peak_8254	chr11	101278024	101279344	Coa3
2_wt.q.05_peak_3022	chr1	171294586	171295023	Ufc1
2_wt.q.05_peak_23315	chr19	28989774	28990712	Cdc37l1
2_wt.q.05_peak_35707	chr5	144965949	144966577	Smurf1
2_wt.q.05_peak_19449	chr17	8372073	8372789	T2
2_wt.q.05_peak_43880	chr9	42209343	42210078	4930546K05Rik
2_wt.q.05_peak_20311	chr17	56716600	56717928	Vmac
2_wt.q.05_peak_38984	chr7	44857175	44858050	Pnkp
2_wt.q.05_peak_31076	chr4	41759699	41760315	Il11ra1
2_wt.q.05_peak_19899	chr17	31564194	31564735	Pknox1
[truncated: 4,351 more rows]

## Sheet: MYT1L_PFC_Active_Enhancer
Chr	Start	End	Gene Name
chr17	36001304	36002543	Ppp1r18
chr8	86280028	86280552	Prkaca	Cd97	Dnajb1	Pkn1
chr16	31290196	31290923	AI480653	Apod
chr13	96405410	96406021	F2r
chr5	116016378	116016949	Acads	Unc119b	Mlec	Dynll1	Srsf9	Gatc	Triap1	Cox6a1	Sirt4	Pxn	Rplp0	Gcn1l1	Rab35	Gm13840	Gm13826	Ccdc64	U4	Gm13832
chr2	112295595	112296388	Slc12a6
chr16	33414121	33414666	Heg1	1700007L15Rik
chr9	122304555	122305053	Snrk
chr18	12059494	12059958	Npc1
chr18	65093300	65093781	Fech	Nars	Nedd4l
chr5	24111445	24111916	Smarcd3
chr1	52294262	52295278	Gls
chr11	105825974	105826284	Ace
chr11	32661959	32663075	Npm1
chr11	83406351	83407094	Ccl6
chr2	148320762	148321620	Thbd	Cd93	Napb
chr8	87512521	87513525	Hook2
chr8	66785362	66786810	Cpe
chr3	33741770	33743224	Ttc14	Fxr1
chr17	45400848	45401363	Hsp90ab1
chr11	90255728	90256202	Hlf
chr9	63632399	63633694	Snord16a	SNORD18	Rpl4
chr13	47134669	47135753	Kdm1b
chr11	43190064	43190377	Mir146
chr6	146958516	146959258	Stk38l	Klhdc5	Med21	Ppfibp1
chr9	51922519	51923363	Mir6244
chr3	79435924	79436929	Etfdh
chr11	62636533	62637244	Snord65	Pmp22	Fbxw10	2410006H16Rik
chr1	121435964	121436643	3830432H09Rik
chr5	151396013	151396523	Brca2	N4bp2l2
chr16	49812948	49813618	Cd47
chr9	56712022	56712627	Cspg4
chr2	65962713	65963569	Galnt3
chr1	39338766	39340575	SNORA33	Rnf149
chr6	50400018	50400614	Osbpl3
chr11	94206498	94207545	Ankrd40	Gm20390	Tob1	Abcc3	Lrrc59	B230206L02Rik	Luc7l3
chr10	90636987	90637702	Tmpo
chr1	24107407	24108439	Fam135a
chr11	6313441	6314531	Ppia
chr1	137664318	137665464	Tmem9	Ipo9
chr2	145683783	145684775	Rin2	Naa20	Crnkl1	AL672100.1	BC039771
chr3	85378755	85379905	Glt28d2
chr13	102533408	102533865	Pik3r1
chr6	120503581	120504687	1700072O05Rik
chr2	84510751	84511997	2700094K13Rik
chr5	23911170	23912027	Abcb8	Rheb	Tmub1	Accn3	Kcnh2	Fastk
chr13	94490623	94491298	AW495222
chr11	106177730	106178567	Cd79b
chr9	46082121	46082831	Bud13	Apoa1	Zfp259
chr12	85956033	85957390	Ltbp2	Npc2	D030025P21Rik	Gm17139	Gm17193	Aldh6a1
chr18	67503490	67504682	B430212C06Rik
chr11	78730846	78731127	Nos2
chr1	140397517	140398209	Nek7
chr7	34308643	34309531	Scgb2b21
chr1	43153326	43154052	AI597479
chr9	37519788	37520486	Olfr160
chr10	69576705	69577896	Ccdc6
chr13	101225289	101225859	Naip1
chr8	54594306	54595407	Aga
chr5	115953980	115955677	Pxn
chr18	84945514	84947016	Cndp2
chr1	40020761	40022203	Map4k4
chr18	42211427	42212617	Sh3rf2
chr2	148334710	148335048	Napb	Cd93
chr3	123149979	123150652	Prss12
chr6	29117558	29118242	Rbm28
chr11	31899787	31900453	Nsg2
chr19	37275039	37275905	Cpeb3
chr1	46912381	46912884	Slc39a10
chr13	54798009	54798806	Rnf44
chr7	125999956	126000784	Knop1
chr11	118626157	118626647	Rbfox3
chr10	99519407	99520211	Kitl
chr15	68754132	68755633	Khdrbs3
chr10	126956888	126957747	Shmt2	Zbtb39	Lrp1	R3hdm2	Gm16229	Ddit3	Ndufa4l2	Nab2
chr5	136362328	136363366	Hspb1
chr9	37575433	37576614	Olfr875
chr11	29777583	29778819	Rtn4
chr2	11346765	11348402	Rbm17	Pfkfb3
chr15	12245490	12247252	Golph3
chr9	83042678	83043294	Hmgn3
chr2	131376647	131377795	Rnf24	Gm14284
chr6	117562943	117564617	Gm7292	Zfp239
chr8	67445687	67446650	Tmem192	Klhl2
chr5	36601608	36602241	Sorcs2	Tbc1d14
chr1	155027310	155027857	Arpc5	Dhx9
chr10	24989651	24990558	Akap7
chr15	74594240	74595181	Ly6d
chr4	102887939	102889041	Slc35d1
chr18	28714013	28714560	4930474G06Rik
chr8	73920887	73921964	Ushbp1
chr9	107775777	107776697	Rbm6
chr2	163674909	163675894	Kcnk15
chr7	49762512	49763243	Zfp141
chr12	85979980	85980459	Vrtn
chr13	93380989	93382043	Serinc5
chr11	113926905	113928577	Sdk2
chr3	95491484	95492193	Adamtsl4
chr7	117106436	117107334	Dennd5a
chr14	28243032	28244186	Arhgef3	Ccdc66	U6
chr9	66988797	66989589	Rps27l
chr1	152982824	152983874	C730036E19Rik
chr7	92114819	92115852	Vmn2r65
chr4	19499114	19499655	Rmdn1
chr2	131775029	131775464	Prnd
chr10	95144085	95144645	Nudt4	Mrpl42	Ube2n
chr19	4481308	4482812	Syt12
chr2	127034437	127036039	1810024B03Rik
chr9	56712900	56713284	Cspg4
chr11	87238503	87239571	Tex14
chr1	121547070	121547671	Epb41l5
chr7	125984157	125984547	Iqck	9030624J02Rik	Itpripl2	SNORA24
chr9	113645325	113646346	Clasp2
chr2	143678162	143678588	Dstn
chr19	43957676	43958576	Dnmbp
chr11	105855047	105856303	Ace3
chr1	140872555	140873429	4930596I21Rik
chr11	23978721	23979145	Bcl11a
chr5	23525274	23526340	Mll5	Srpk2	Pus7	Rint1	Tomm7	Fam126a	Klhl7	Nupl2
chr3	97733567	97734726	Gm5544
chr1	134638271	134638606	Nfasc
chr11	105794960	105795526	Gm11672	Smarcd2	Ccdc47	Taco1	Ddx42	Limd2
chr1	153940444	153941445	1700025G04Rik
chr6	113611488	113613195	Sec13	Cidec	Vhl	Irak2	Tmem111	Rpusd3
chr2	143370338	143371141	Pcsk2
chr2	84556736	84557897	Zdhhc5
chr15	100887540	100888935	Fignl2
chr6	55415936	55416568	Adcyap1r1	Aqp1
chr7	120315480	120316994	Arntl	Btbd10
chr9	72834929	72836185	Ccpg1os
chr2	164137444	164137792	Svs6
chr6	146959829	146960916	Klhdc5	Med21
chr2	11423564	11424598	Pfkfb3
chr6	108434392	108437174	Mir7661
chr18	54221857	54222453	Csnk1g3
chr2	49472713	49473307	Kif5c
chr6	6487921	6488853	Gm5873
chr6	8900019	8900834	Nxph1
chr2	136781199	136782472	Jag1	2210009G21Rik
chr7	110989081	110989712	Hbb-bh2
chr1	193350212	193350945	Nenf	Nek2
chr6	94584167	94584870	Slc25a26	5
chr7	112203977	112205000	Olfr677
chr5	89014504	89015990	Igj	Utp3	Rufy3	Grsf1	Mob1b	Dck
chr19	47542936	47543382	Sh3pxd2a
chr9	48795426	48795911	Usp28
chr11	86664305	86665802	Trim37	Ypel2
chr17	80621022	80621871	Gemin6
chr9	120869495	120870053	Ctnnb1
chr15	34265123	34265984	Laptm4b	Matn2
chr10	93053642	93053956	Snrpf
chr3	97849780	97850625	Pde4dip
chr6	113029334	113029814	Gt(ROSA)26Sor
chr4	42886476	42887837	Fam205c
chr15	10410601	10411428	Rad1
chr15	66770951	66772738	Ndrg1	Gm2895
chr12	82265664	82266538	Mir3067
chr5	129520710	129521764	Ran
chr5	8311158	8312867	Dbf4	Slc25a40
chr18	59330072	59330891	Chsy3
chr9	75160298	75161302	Gnb5
chr2	92265832	92266797	Pex16	Gyltl1b	1700029I15Rik	Mapk8ip1	Cry2	Slc35c1	Creb3l1	Chst1
chr8	122901347	122901942	Zdhhc7	Fam92b	Gse1	Gins2	1190005I06Rik	Cox4i1
chr7	117108357	117108966	Dennd5a
chr10	40069069	40070013	Cdk19
chr1	36813481	36814050	Zap70
chr3	63941318	63942048	Vmn2r2
chr9	108205756	108206657	Rhoa
chr15	77366838	77367309	Apol7c
chr12	74303272	74303850	Trmt5	Slc38a6	Six1
chr8	18671036	18671437	Angpt2	Mcph1
chr11	4104922	4105996	Tbc1d10a	Lif	Rnf215	Mtfp1	Gatsl3	Mir3060	Sf3a1	Sec14l2	Ccdc157
chr10	111314935	111316199	Gm20758
chr12	100486090	100486384	Foxn3
chr6	92132672	92132974	Nr2c2
chr9	121905743	121906591	Pomgnt2
chr8	67238376	67239523	Sc4mol	Cpe	Tmem192
chr15	9002553	9003302	Lmbrd2
chr5	143690474	143691471	Tnrc18	Fbxl18	Actb	Fscn1	Rnf216	Rbak
chr4	12016995	12018623	Tmem67
chr13	58192044	58192471	Hnrnpa0	5133401N09Rik	Ubqln1	Gkap1	Kif27	Rmi1	Hnrnpk
chr3	153457235	153457955	5730460C07Rik
chr15	71535272	71535688	Fam135b
chr1	60395851	60396644	Cyp20a1
chr1	83152967	83153719	Daw1
chr9	75194539	75195527	Bcl2l10
chr1	137363300	137363668	Ipo9	Csrp1	Phlda3	5S	Rnpep	Arl8a
chr13	101504883	101505554	Cdk7
chr17	28624569	28625524	Fkbp5
chr11	97220112	97221000	Socs7
chr19	12373984	12374809	Olfr1436
chr9	107838770	107839386	Tusc2	Ifrd2	Gnai2	Sema3f	Rbm5	Rbm6	Mon1a	Mst1r	Camkv	Traip	Uba7	6230427J02Rik	Ip6k1	Gmppb	Amigo3	Rnf123	Apeh	Nicn1
chr6	115493091	115493879	Tsen2
chr6	57795676	57797628	Vmn1r21
chr6	28969227	28970386	Mir129-1
chr11	26099544	26100379	Mir6372
chr3	122506227	122507198	4930447N08Rik
chr11	3797360	3797666	4921536K21Rik
chr2	131378710	131379398	Rnf24	Gm14284
chr14	65572915	65574143	Hmbox1
chr6	121035495	121036370	Mical3
chr12	80394712	80395954	Rad51b
chr7	89628565	89629826	Eftud1
chr3	55267426	55267802	Dclk1
chr3	89083753	89084328	Efna1
chr2	102742502	102743314	Cd44
chr4	153328011	153328471	BC039966
chr17	7152557	7153081	Rsph3b
chr10	111256907	111257798	Phlda1
chr9	59551324	59551794	Gramd2
chr12	3568063	3569299	Dtnb
chr9	57966828	57967549	Ccdc33
chr2	5161773	5162331	Ucma
chr15	100109803	100110561	Tmprss12
chr11	67482205	67482950	Gas7	Wdr16	Glp2r
chr8	35742296	35743280	Dusp4	Tnks
chr12	83715826	83716983	Rgs6
chr8	11273009	11273995	9530052E02Rik	Gm15419	Col4a1	Rab20	Gm15418	E230013L22Rik
chr8	126326116	126327508	Rab4a
chr2	112292795	112293295	Emc7
chr9	75196035	75198536	4933433G15Rik	Mapk6	Tmod3	Gm9719	Arpp19	Gnb5
chr9	124016919	124017378	Ccr2
chr4	56962839	56964235	Tmem245
chr9	66977418	66978556	Gm19299
chr12	100567399	100569507	Foxn3
chr12	70697397	70698961	Mettl21d	L2hgdh	Sos2
chr4	128399354	128400480	Phc2
chr3	152158069	152158732	Pigk	Fam73a	Usp33
chr9	75253155	75255397	4933433G15Rik
chr11	53841760	53842495	Slc22a4
chr8	105873970	105874648	1600027J07Rik
chr15	98812749	98813246	4930578M01Rik
chr2	151733453	151733943	Angpt4
chr15	76783287	76783828	Mfsd3	Grina
chr9	83041389	83041775	Hmgn3
chr5	23495998	23498684	Pus7	Rint1	Tomm7	Fam126a	Klhl7	Nupl2	Kcnh2	Nos3	Tmub1
chr1	175142886	175143950	Olfr1404
chr15	39775350	39776466	Lrp12
chr6	56877200	56877796	Nt5c3
chr6	148626826	148627830	4930528G23Rik
chr16	20488574	20489652	Clcn2	Alg3	Camk2n2	Klhl24	Map6d1	Dvl3	Chrd	Abcf3
chr4	130039623	130039904	Zcchc17
chr15	18748669	18748980	Cdh10
chr4	26276123	26276941	Manea
chr18	24762897	24763492	Slc39a6
chr14	49283702	49284224	Otx2os1
chr6	133983456	133983734	Etv6
chr5	130087513	130089226	Mmp17
chr11	119905875	119907210	Aatk
chr12	5386697	5387775	Klhl29
chr10	59587923	59588548	Mir6906
chr2	165826374	165827006	Zmynd8	Ncoa3	Sulf2
chr13	42403112	42404060	Edn1
chr6	39674522	39675891	Braf
chr9	59330083	59330838	Gm20199
chr7	29088767	29089273	Dll3
chr3	133965200	133966231	Cxxc4
chr11	80622809	80623599	Tmem98
chr9	37829697	37831067	Olfr883
chr1	175212051	175212737	Mptx2
chr2	57905186	57906186	Ermn
chr15	100107893	100108571	Tmprss12
chr4	9693799	9694341	4930412C18Rik
chr7	69232889	69234308	Mir344i
chr16	13207428	13208162	Ercc4
chr4	108056938	108058502	Fam159a
chr6	120480325	120481019	Atp6v1e1	Kdm5a	Cecr6
chr4	101219718	101220361	Dnajc6
chr17	30333166	30333535	Mdga1	Zfand3	Btbd9	Glo1
chr5	93127503	93127771	Scarb2	Stbd1	Ccdc158	Shroom3	Ccni
chr15	55018170	55019844	Mrpl13	Gm9920	Dscc1	Enpp2	Deptor	Taf2
chr2	30503562	30504017	Ier5l	Cstad	1700001O22Rik	Mettl11a	Asb6	Prrx2	Ptges	BC005624
chr9	20696176	20696538	A230050P20Rik	Col5a3	Pin1	Gm20603	Gm17470	Tyk2	Ubl5	Fdx1l
chr10	77636330	77637109	D10Jhu81e
chr18	53802575	53803359	Gm19466
chr7	113333722	113335039	Gm17757
chrX	101313854	101314529	Mir672
chr6	54545898	54546429	Fkbp14
chr19	8788813	8790055	Slc3a2
chr17	75711192	75711927	Ltbp1
chr7	92164933	92165957	Vmn2r66
chr1	91062443	91062886	Sh3bp4
chr9	112095123	112095699	Arpp21
chr9	21041477	21042118	Cdc37	Cdkn2d	snoU105B	Gm16754	Keap1
chr12	76694609	76695557	Rplp2	Sgpp1	Wdr89
chr10	116420709	116421405	Best3
chr6	117846121	117847372	Hnrnpf
chr9	48776007	48776545	Htr3b
chr8	69010461	69011200	Tma16
chr5	53941265	53942885	Rbpj
chr16	37617699	37618537	Stxbp5l	Gtf2e1	Ndufb4	Fstl1	Lrrc58
chr3	59149462	59150377	Igsf10
chr15	54946921	54948040	Gm9920
chr15	72376992	72377832	Kcnk9
chr7	135205108	135205521	Itgam
chr14	13177612	13178130	3830406C13Rik	Fezf2
chr2	156973427	156974624	Gm1332	Rbl1	5430405H02Rik	4930518I15Rik
chr1	33776041	33776815	Rab23
chr17	5506423	5506716	5730437N04Rik	Zdhhc14
chr8	106916760	106918438	Cklf
chr13	38753594	38754041	Eef1e1
chr4	86234519	86235326	Scarna8
chr9	121599998	121601556	Cck	Vipr1	Sec22c	Deb1	Nktr	Zfp651	Kbtbd5	Higd1a
chr18	20711868	20712720	Dsg2
chr10	83101233	83101927	A230046K03Rik
chr9	71016109	71016718	Gm32511
chr4	82853577	82853956	Frem1	Ttc39b	Snapc3	Psip1
chr9	108237205	108237515	Gpx1
chr9	112140497	112141633	Arpp21
chr19	3526389	3527060	Ppp1ca	Mrpl21
chr11	46201397	46203797	Itk
chr2	165818891	165820204	Zmynd8	Ncoa3	Sulf2
chr3	137796148	137797110	Mttp
chr19	36809460	36809849	Ppp1r3c	Tnks2	Fgfbp3
chr13	98728982	98730259	Btf3
chr17	25761128	25762061	Fam195a	Chtf18	Gm17480	Metrn	Rab40c	Rpusd1	Rhot2	Lmf1	Ccdc78	0610011F06Rik
chr4	82055433	82055703	Nfib
chr11	78702625	78703215	1810012P15Rik	Fam58b	Wsb1
chr2	132606882	132607787	Chgb
chr10	40687259	40689388	Cdc40	Wasf1
chr6	108504319	108505517	Arl8b
chr6	115180829	115181857	Tsen2	Timp4
chr15	74597445	74598331	Ly6d
chr11	3832369	3833106	Tcn2
chr9	41345042	41345477	Mirlet7a-2
chr16	78342815	78344675	Btg3
chr2	39150500	39151502	Scai
chr8	95606716	95607620	Ces1b
chr11	3767615	3768479	Osbp2
chr18	38096207	38097122	Diaph1
chr4	101087985	101088406	Ak4
chr12	88993533	88993961	Gm16381
chr6	28554019	28555916	Calu
chr8	86705725	86706046	Mir181d
chr14	78273888	78274723	Dnajc15
chr12	16900383	16900777	Rock2
chr5	125888758	125889622	Gm10382	Scarb1	Bri3bp	Aacs
chr15	80994918	80995464	U4	Adsl
chr1	84215573	84216169	Mir6353
chr3	40693648	40694738	Abhd18
chr4	34708000	34708286	Gm136
chr7	16587165	16588353	Gltscr1
chr17	54438341	54439853	Slc5a7
chr2	131666542	131667467	Prnp	Prnd	Rassf2
chr3	58493294	58493739	4930593A02Rik
chr7	111301586	111302260	Ubqlnl
chr7	110821417	110822764	Olfr624
chr18	65092543	65093024	Fech	Nars	Nedd4l
chr14	35121574	35122842	Glud1
chr5	113513805	113514256	Crybb3
chr13	49644526	49645275	Cenpp	Iars	Ecm2	Aspn	Nol8
chr1	5315608	5316470	Atp6v1h	Rgs20	Gm17100
chr15	77363772	77364567	Apol7c
chr11	79072015	79072592	Wsb1
chr4	145052672	145053226	Smarca5-ps
chr1	154747822	154748404	Rgl1	Arpc5	Ncf2	Smg7	Nmnat2
chr15	74596219	74596695	Ly6d
chr2	32102604	32105094	Uck1	Ptges2	Lcn2	Dnm1	Gm13610	Mir2861	Slc25a25	Fam102a
chr10	58797361	58798278	Sowahc
chr7	126113447	126114036	Gde1	Gprc5b	SNORA24
chr14	70723773	70725117	2610301G19Rik	Pdlim2	Hr	Sorbs3	Bin3	Slc39a14
chr5	115745615	115745945	Dynll1	Msi1	Coq5	Pop5	Triap1	Gatc	Unc119b	U4	Gm13832	Gm13830	Rnf10	Sirt4	Sppl3	Pxn	Gm13826
chr2	131670474	131674075	Prnp	Prnd
chr17	5507053	5507411	5730437N04Rik	Zdhhc14
chr1	180507280	180507971	B230369F24Rik	Fam36a	Kif26b	U1
chr1	170218009	170218597	Pbx1
chr16	31876038	31877246	Mfi2
chr15	100251126	100251660	Gm5475
chr6	136363114	136364868	E330021D16Rik
chr7	105563296	105563830	Lrrc32	Acer3
chr14	66924457	66925623	Trim35	Stmn4	Ptk2b	Ephx2
chr2	104337255	104338471	Hipk3
chr18	53903127	53903919	Cep120	Csnk1g3	Ppic
chr9	56981122	56982029	Man2c1os
chr5	115572143	115573219	Acads
chr5	65194485	65195057	Klf3
chr11	77965113	77966336	Taok1	Pipox	Sez6	Phf12	Dhrs13	Eral1	Traf4	Nek8	Tlcd1	Rpl23a	Rab34	Proca1	Sdf2	Supt6h	2610507B11Rik	Spag5	Aldoc	Pigs	Unc119	Slc46a1	Poldip2
chr12	31857403	31858422	Fam110c
chr15	100057440	100058351	Atf1
chr4	138854982	138855665	Ubr4	Minos1	Pqlc2
chr16	34493616	34494569	Kalrn
chr11	49942326	49943109	Tbc1d9b
chr1	40235438	40236312	Il1r1
chr5	42239132	42240467	Bod1l
chr8	60054938	60055738	Sap30	Hmgb2	Galnt7
chr7	112172851	112173319	Olfr675
chr2	136512667	136513999	Gm14053
chr11	17107006	17108542	Wdr92
chr11	94425364	94426186	Chad
chr5	93000451	93001548	Fam47e
chr2	90875134	90875743	Rapsn
chr18	23654018	23654921	Dtna
chr5	34276336	34277941	Fam53a	Tmem129	Fgfr3	Letm1	Whsc1	Whsc2	Gm1673	Mxd4	Rnf4
chr2	92437958	92439142	Chst1
chr13	100971157	100972483	Naip2
chr5	151059767	151060465	Fry
chr19	5414453	5415414	4930481A15Rik	AI837181	Tsga10ip	Ehbp1l1	Sipa1	Rela	Fam89b	Kcnk7	Sf3b2	Map3k11	Efemp2	Fibp	Ovol1	Neat1	Sart1	Fosl1	Mus81	Pacs1	Scyl1	Kat5
chr18	33000205	33001231	4930455D15Rik
chr2	130951241	130951757	Hspa12b
chr13	9757492	9758520	Zmynd11
chr5	148133339	148134116	Urad
chr15	73430411	73430748	Slc45a4
chr17	30130652	30130949	Mdga1
chr9	7949613	7950908	C330006D17Rik	Birc2	Tmem123
chr8	39315451	39316376	Mir383
chr5	65273666	65274290	Tlr6	Wdr19
chr9	62284342	62285105	Glce	Anp32a	Coro2b
chr3	95798615	95799444	Ensa	Ecm1	Tars2	Rprd2	Prpf3	Mrps21	Aph1a	Anp32e	Plekho1	Vps45
chr13	43495195	43496320	Ranbp9	Ccdc90a
chr5	147043050	147044971	Rnf6	Cdk8	Wasf3	Mir5105
chr17	28626734	28628130	Fkbp5
chr2	57906454	57907286	Ermn
chr2	145724072	145724803	Naa20
chr11	95379025	95379906	Nxph3
chr7	111748609	111749211	Olfr655
chr7	120712317	120712676	Far1os
chr7	4086988	4088141	Leng8
chr16	38695037	38695659	Poglut1	Cd80	Gm15953	D930030I03Rik	Gm17103
chr10	69899317	69900530	Fam13c
chr15	50725164	50725962	Trps1
chr9	64787816	64788814	Slc24a1
chr6	108160475	108161193	Itpr1
chr6	41553349	41554093	Ephb6
chr5	74207022	74207544	Sgcb
chr2	129090204	129091354	Ckap2l	Gm14023	Ttl
chr6	112900010	112900568	Srgap3
chr9	108706868	108708146	Nckipsd
chr9	25196707	25197579	Eepd1
chr1	91445220	91445713	Agap1	Gbx2
chr8	91216702	91217893	Cyld
chr13	46055180	46056186	Atxn1
chr18	25734844	25735691	Celf4
chr16	42745775	42746725	Zbtb20
chr2	7006536	7007723	Celf2
chr5	125578030	125579323	Ccdc92	Gm10382
chr6	135316419	135316923	Emp1
chr1	154476127	154476909	Rgl1
chr9	94650172	94650577	Mir7656
chr6	92521468	92522185	Prickle2
chr6	122768968	122770251	Foxj2
chr1	136713746	136714863	Cyb5r1
chr9	83321745	83322148	Gm2087
chr4	140470034	140470419	Arhgef10l	Rcc2	Padi2	Sdhb	Atp13a2	Mfap2	Crocc	Necap2	D4Ertd22e	Fbxo42	6330545A04Rik
chr4	125814411	125814903	Col8a2	Eif2c3	Trappc3	Stk40
chr9	119005611	119006457	Plcd1
chr18	38082892	38083179	Diap1	Arap3
chr8	109951430	109953050	Nob1
chr2	125691760	125692899	Galk2
chr7	64644451	64645612	Gabrg3
chr12	31754181	31757030	Fam110c
chr6	57798201	57800025	Vmn1r21
chr3	132901335	132902519	Arhgef38
chr18	39194784	39197557	Ndfip1
chr18	80852970	80854031	Nfatc1	Ctdp1
chr2	131688246	131688830	Erv3
chr9	108411059	108412405	Qars
chr14	21519291	21521082	Chchd1
chr1	127812582	127813497	Lypd1
chr19	41734400	41734910	Lcor	Slit1	Arhgap19	Rrp12	Pgam1	Mms19
chr18	75082146	75083332	Rpl17
chr4	46655581	46657918	Tbc1d2
chr2	143689769	143690508	Bfsp1
chr11	45897141	45897967	Thg1l	Clint1
chr6	99567188	99568138	Foxp1	Eif4e3
chr2	73613092	73613622	Chn1
chr12	82434519	82435578	Slc8a3
chr3	136769596	136770775	Ppp3ca
chr14	70473724	70474610	Egr3
chr11	97609975	97611573	Pip4k2b
chr5	107521516	107522612	Gm8145
chr10	126485006	126485976	Cyp27b1
chr3	57381739	57382189	Wwtr1
chr2	131773085	131774397	Prnd
chr11	98269755	98271102	Erbb2
chr2	167177635	167178011	B4galt5
chr4	6839388	6840535	Tox
chr4	151640571	151641953	Rpl22	Tnfrsf25	Thap3	Klhl21	Phf13
chr5	23762695	23763181	Mir684-1
chr12	100361148	100362231	Ttc8
chr14	31383041	31383586	Mir3076
chr10	70799109	70800542	Bicc1	Ube2d1	Tfam
chr15	74577864	74578295	2300005B03Rik
chr11	100720717	100721611	Stat5a
chr17	30062545	30063416	Pim1	Tbc1d22b	Rnf8	Mdga1	Zfand3
chr2	104207828	104208546	D430041D05Rik	Hipk3	Tcp11l1
chr19	37280867	37283852	2022-03-05
chr19	37254749	37256327	Cpeb3
chr11	50253847	50255161	Gm16641	Mgat4b	Maml1
chr5	20446215	20447370	Phtf2
chr9	48723318	48724184	Htr3a
chr16	32934395	32935475	Snx4	Muc20
chr2	162888997	162889642	Mir7003
chr7	135726525	135727420	Mcmbp	Bag3
chr4	44310646	44311352	Melk
chr1	137427879	137428725	Shisa4	Arl8a	5S	Lmod1	Phlda3
chr4	128734777	128735090	Rnf19b
chr2	3156429	3157540	Rpp38
chr15	38906742	38907433	Cthrc1
chr2	131686375	131687081	Erv3
chr9	65758884	65759724	Trip4
chr11	116079353	116079879	Recql5	Galk1	H3f3b	Unk	Wbp2	Trim47	Trim65	Mrpl38	Fbf1	2310004N24Rik	Acox1	Evpl	Srp68	Galr2	Exoc7	Foxj1	Rnf157	Fam100b	SCARNA4
chr2	73614314	73615016	Chn1
chr19	47040650	47041724	Nt5c2
chr2	91024557	91025978	Madd
chr12	5125160	5126559	A830093I24Rik	0610009D07Rik	BC068281	Ubxn2a	Atad2b
chr5	123593401	123594290	Rhof
chr18	65045485	65046381	Nedd4l
chr13	12203768	12204472	Ryr2
chr7	128731470	128732256	1700025J12Rik
chr3	95864834	95865441	Vps45
chr13	98008433	98009058	Enc1
chr2	68419379	68419891	4933409G03Rik
chr6	31305340	31307944	Mkln1
chr17	44685174	44686048	Runx2
chr4	132932838	132933215	Gpatch3	Pigv	Gm17688	Slc9a1	Sytl1
chr9	62222001	62222805	Coro2b
chr4	86233279	86233747	Scarna8
chr8	23917298	23918635	Ap3m2
chr10	14268518	14269113	Adgrg6
chr18	61852979	61853562	Arhgef37	Afap1l1
chr3	122078954	122079422	Bcar3
chr6	140466552	140467761	Plekha5
chr14	65207554	65208129	Mir124a-1
chr19	8914168	8914667	Gng3
chr8	54596913	54597523	Aga
chr6	140462743	140463138	Plekha5	Aebp2
chr3	55261920	55262785	Dclk1
chr4	94317270	94317813	Lrrc19
chr9	86634677	86635296	Prss35
chr14	21756617	21757684	Sec24c	Vcl	Synpo2l	Plau	Gm6128	Chchd1	Ap3m1
chr11	32243354	32243957	Sh3pxd2b
chr17	37538149	37538483	Olfr107
chr1	54822028	54822602	Pgap1	Coq10b
chr19	8852505	8852808	Tmem179b
chr13	81824162	81825480	Gpr98	Lysmd3	Gm17259	Cetn3
chr16	37531791	37532990	Ndufb4
chr5	54239374	54241803	Rbpj	Cckar	Tbc1d19	Stim2
chr11	80670051	80670566	Spaca3
chr14	105658127	105659045	Rbm26	Ndfip2	U6
chr7	80520109	80520668	Rgma
chr2	136921081	136921959	Mkks
chr16	17327333	17327705	Serpind1
chr5	112700911	112701567	Tpst2
chr11	54832738	54834705	Tnip1	Anxa6	Slc36a1
chr6	18639932	18640478	Cttnbp2	Naa38
chr15	73431087	73432074	Slc45a4
chr6	8659142	8659438	Ica1
chr13	58203020	58203654	Klhl3
chr18	10033510	10034093	Usp14
chr10	7076537	7076842	H60c
chr11	100753911	100755316	Stat5b	Ptrf	Psmc3ip	Vps25	Coasy	Fkbp10	Stat3	Rab5c
chr6	29929882	29931091	Smkr-ps
chr16	89907935	89908194	Tiam1
chr17	8561008	8561544	T2
chr8	73289872	73290721	Ifi30
chr1	193351245	193352064	Nenf	Nek2
chr4	40884125	40885553	Nol6	Spink4	Ube2r2	Aptx	B4galt1	Chmp5	SNORD121A	Gm12396	Smu1	Dnaja1
chr2	84573684	84575168	Ypel4
chr2	43923799	43924935	Arhgap15os
chr11	106559654	106560361	U6	Ddx5
chr8	13021538	13021887	F7
chr3	95496025	95496308	Adamtsl4
chr10	107751919	107753314	Ppp1r12a
chr6	108328431	108328696	Itpr1
chr12	111725268	111726865	Dio3	Ppp2r5c	Dync1h1	Hsp90aa1	Wdr20a	Dio3os
chr12	15760989	15762487	Gm5432	Trib2
chr13	97441681	97443005	Hmgcr
chr15	27625048	27626039	Fam105b
chr8	90973961	90975166	Tmem188	Papd5	Adcy7	Brd7	Nkd1
chr3	95494432	95494937	Adamtsl4
chr6	92133330	92134347	Mrps25
chr8	11723494	11723761	Arhgef7
chr15	79577153	79578597	Sun2
chr2	68417584	68417882	4933409G03Rik
chr7	73532636	73533655	Lrrk1
chr13	42803888	42805146	Phactr1
chr11	70959799	70962576	Nlrp1a
chr16	84970683	84971135	Gm10791
chr11	23993720	23994731	Papolg	Bcl11a
chr6	41265873	41267167	Try5
chr9	50611816	50613010	Sik2	Alg9	Layn	Il18	Ppp2r1b	Dlat	Pts	Timm8b
chr12	40925671	40926900	Lsmem1
chr15	10413507	10414437	Rad1
chr11	7092564	7092840	Gm11985
chr6	3922745	3923320	Tfpi2
chr8	126961179	126962028	Pgbd5
chr3	97909743	97910326	Pde4dip	Sec22b	Notch2
chr5	20461497	20463040	Rsbn1l
chr2	132107218	132108108	Cds2
chr15	18744209	18745039	Cdh10
chr2	132513275	132514790	1110034G24Rik
chr13	58866049	58866835	4930455J16Rik
chr6	55870681	55871556	Neurod6
chr11	75295187	75295824	Prpf8
chr8	106919204	106920070	Cmtm4
chr12	70262064	70263046	Rps29
chr3	97858829	97862254	Sec22b	Notch2	Pde4dip
chr2	118684935	118685770	Ivd
chr5	73618440	73619752	Ociad1	Fryl
chr11	59496395	59497117	Snap47	Gm16062	Zkscan17	Gm12263	Flcn	Prss38	Med9	Rasd1
chr9	77197826	77198842	Mlip
chr9	86592899	86594225	Me1
chr14	76885601	76888022	Tsc22d1
chr13	59073014	59075226	Ntrk2
chr5	107448717	107449379	Gm8145	Tgfbr3
chr8	126257727	126258187	6030466F02Rik
chr13	99303604	99304305	Btf3
chr12	74142059	74143800	Trmt5
chr6	13632485	13633240	B630005N14Rik
chr2	122060712	122061348	Sord
chr16	25680153	25680465	Trp63
chr15	81879718	81880757	Nhp2l1
chr4	118085011	118085385	Szt2
chr7	111366952	111367613	Trim6
chr5	93137056	93137594	Shroom3
chr1	159386293	159386718	BC026585
chr14	64883295	64884303	Prss52	Msra
chr6	30458392	30459586	Ssmem1
chr10	14267541	14268144	Adgrg6
chr3	85683464	85684236	Rnu73b	Sh3d19	Fam160a1	SNORA32
chr5	143941407	143943998	Spdye4b
chr6	108330339	108333311	Itpr1
chr1	170356657	170357447	RP23	Pbx1
chr14	14956563	14957009	Psmd6
chr6	114044472	114045702	Ghrl	Sec13	Atp2b2	Slc6a11	Slc6a1
chr17	37067907	37068217	H2
chr11	105826624	105829588	Ace
chr18	82575506	82576133	Galr1
chr5	34241963	34242781	Mir7024
chr11	5051775	5053300	Emid1
chr11	32504715	32505610	Rhbdf1	Fbxw11
chr5	150298434	150299130	Alox5ap	6330406I15Rik	Wdr95	Hsph1	B3galtl
chr5	144077036	144078293	E130309D02Rik
chr19	23213952	23214750	Klf9
chr7	112183217	112183938	Olfr676
chr11	98722414	98722763	Wipf2
chr19	29485053	29485476	Pdcd1lg2
chr11	105825246	105825680	Ace
chr14	27807753	27809591	Hesx1
chr8	4262915	4264157	Ctxn1
chr3	55989980	55991300	Nbea
chr12	8464977	8466182	Rhob	Gdf7	Laptm4a	Hs1bp3
chr19	8911588	8912526	Bscl2
chr13	77275022	77275751	Slf1
chrX	137063135	137064042	Mid2	Tsc22d3
chr1	87812778	87813855	Cab39	Itm2c	Gpr55	2810459M11Rik	Psmd1	Armc9
chr3	96001082	96002078	Bola1
chr5	74040274	74041090	Spata18
chr9	37890630	37891781	Olfr887
chr11	32663538	32663966	Npm1
chr2	5533412	5534771	Camk1d	Nudt5	Cdc123	Sec61a2	Gm13216	Gm13199
chr7	111362428	111363360	Trim6
chr5	113594440	113595191	2900026A02Rik
chr5	51982806	51983440	Ppargc1a
chr5	120680475	120680740	Rbm19	Lhx5	Sdsl	Slc24a6
chr9	51718085	51718610	4933407I05Rik
chr13	59834673	59834935	4930528D03Rik
chr2	38143783	38144700	Dennd1a
chr13	76104817	76105459	Spata9
chr2	148599013	148600056	Cst11
chr14	21789276	21790102	Sec24c	Vcl	Ap3m1	Adk
chr19	3527486	3528502	Coro1b	Ndufs8	Ppp6r3	Lrp5
chr9	16098346	16099376	Fat3
chr3	59066130	59067169	P2ry12
chr7	120094073	120094373	Rassf10
chr11	119961147	119962177	Enthd2
chr18	42112203	42113026	Prelid2
chr11	94036207	94037035	Ankrd40	Col1a1	Tob1	Nme1	Nme2	Mbtd1
chr5	33015052	33016129	Ppp1cb	Yes1	Pisd	C330019G07Rik	Depdc5	Gm2420
chr3	97731916	97733299	Gm5544
chr1	43767763	43768201	1500015O10Rik
chr8	23863683	23864113	Plat
chr2	90869653	90872165	Rapsn
chr2	85425791	85426443	Olfr998
chr15	37721281	37721553	Ncald
chr17	25556423	25556694	Gnptg	0610007P22Rik	Ube2i	Tpsg1	Cacna1h	Sox8	Lmf1
chr8	25708871	25710015	Ido1
chr4	134156526	134157103	2610002D18Rik	Tmem50a	Syf2	Sepn1	Stmn1
chr8	126665237	126667273	Acta1	Nup133	Abcb10	Taf5l	Urb2	Galnt2
chr5	53177461	53178429	Zcchc4
chr19	56470823	56472311	Casp7
chr9	86777647	86778850	Snap91
chr15	79664363	79665759	Cbx6
chr5	63159202	63160219	Arap2
chr6	146877412	146878533	Arntl2	Mrps35
chr1	66369252	66369967	Mtap2	Unc80
chr2	102633324	102635414	Cd44
chr2	130656364	130657997	Ddrgk1	4930473A02Rik	1700037H04Rik	Itpa
chr3	79015017	79016616	4921511C10Rik
chr4	138797349	138797852	Gm16287	Capzb	Ccnd3	Nbl1
chr19	41152049	41152536	Opalin
chr12	85656278	85656662	Zfp410
chr10	100053792	100055475	1700017N19Rik
chr2	102694831	102695578	Pdhx	Apip
chr8	11776716	11777369	Col4a1
chr2	27785820	27786213	Col5a1	Gm13372	2810430I11Rik
chr15	67133260	67133919	St3gal1	Ndrg1
chr5	122584763	122586199	Ccdc63
chr3	65156909	65157488	A730090N16Rik
chr5	30342736	30343444	Dnajb6	Tyms
chr6	143190424	143191471	D6Ertd474e
chr1	177625782	177626554	Opn3
chr6	115862879	115864355	Raf1	Cand2	Rpl32	Ift122	Rho	Plxnd1	Tmem40
chr6	136817393	136818290	Erp27	Mgp	Atf7ip	Pde6h
chr11	78240121	78241150	Slc13a2
chr1	76483536	76484732	Gm17751
chr6	86955487	86956302	Nfu1
chr11	85492227	85492920	Tbx2
chr16	17329380	17331073	Serpind1
chr7	117918055	117918860	Mrvi1
chr18	35810667	35811721	Mzb1
chr11	5027684	5029247	Uqcr10	Nf2	Nipsnap1	Thoc5	Ap1b1	Rasl10a	Gas2l1	Rhbdd3	Ewsr1	Emid1
chr9	37363915	37364394	Nrgn
chr2	119842252	119842928	Mir7665
chr11	54726717	54728036	Gm2a	Slc36a1	Sparc	Gpx3	Anxa6
chr6	41556202	41557064	Ephb6	Trpv6	Trpv5	Kel
chr1	194563595	194564681	Sertad4
chr17	28697204	28697922	Mir6969
chr6	17142646	17143588	D830026I12Rik
chr3	95087656	95088839	Prune
chr3	27503494	27503835	Pld1
chr3	153567711	153568345	Msh4
chr5	115642762	115643255	2210016L21Rik	Sppl3	Acads	Mlec	Cabp1	Pop5	Rnf10	Coq5	Dynll1	Srsf9	Gatc	Triap1	Cox6a1	Msi1	Rplp0
chr1	90974675	90975234	Sh3bp4
chr2	167150461	167151000	Slc9a8	Stau1
chr3	9751099	9751744	Pag1
chr9	61518171	61518437	Tle3	Kif23
chr11	106822221	106824217	Nol11	Ccdc45	Polg2
chr16	34995604	34996314	Ptplb
chr16	11092161	11093444	Txndc11
chr19	7280303	7281202	Otub1
chr13	34095242	34096651	Serpinb6a
chr5	151394396	151394984	Brca2	N4bp2l2
chr12	100586473	100587688	RP23	Foxn3
chr12	81323721	81325130	Zfp36l1	Actn1	Exd2	Dcaf5	Scarna3b
chr1	51199045	51199893	Sdpr
chr11	41812939	41813489	Gabrg2	Gabra1
chr7	91284064	91285633	Fam108c	Gm16703	Fah
chr1	170402629	170404094	Pbx1
chr17	28826999	28828215	Mapk14
chr1	23263890	23265128	Ogfrl1
chr14	47505776	47509094	Gm10101	Cnih
chr1	53845226	53846999	Stk17b
chr15	54399359	54399671	Mal2
chr7	112268648	112269243	Olfr681
chr2	79094218	79095061	Itga4
chr4	148475827	148476599	Dffa
chr18	15001049	15002600	Taf4b
chr17	27790355	27791329	Pacsin1
chr6	115085508	115086346	Gm17733
chr18	39322818	39324511	Gm15336
chr12	100404019	100405023	4930474N09Rik
chr10	117874792	117877455	Ifng
chr1	134625152	134625479	Gm10538
chr9	110064448	110064779	Mtap4	Smarcc1	2610002I17Rik
chr17	24867631	24868625	Rpl3l
chr6	92136186	92136816	Mrps25
chr10	13586670	13588781	Aig1
chr18	77226395	77227182	Skor2	Ier3ip1	Hdhd2	Katnal2	Pias2
chr1	154428188	154428630	Tsen15
chr15	54399981	54400517	Mal2
chr10	111254811	111255517	Phlda1
chr19	23106814	23107619	Klf9	2410080I02Rik
chr3	27593264	27593868	Pld1
chr11	28660494	28660946	Mir217
chr16	27384733	27385613	Ccdc50
chr2	70897369	70897913	Mettl8
chr6	29889574	29891376	1700023L04Rik
chr15	66776046	66776682	Ndrg1	Gm17035	Gm2895
chr4	111900227	111900636	Skint3
chr7	113337197	113337533	Gm17757
chr18	85103565	85104612	Fbxo15
chr1	165071843	165072388	Gm17698
chr12	117500747	117501753	Wdr60
chr6	43212734	43213442	Arhgef5
chr4	129321524	129322204	Txlna
chr3	108881194	108883329	Slc25a54
chr13	105022749	105023414	Ppwd1
chr6	41631070	41631672	1700034O15Rik
chr10	30566331	30566867	Hey2
chr5	5163143	5164944	SCARNA15	Cdk14
chr2	65124234	65124798	Cobll1
chr14	61757220	61758310	Sacs
chr15	53001093	53001951	Ext1
chr5	65668670	65669295	Ugdh	Wdr19	Fam114a1	Tlr6	Ube2k	Klb	Rpl9
chr13	6492423	6494098	Pfkp
chr12	74301254	74302359	Trmt5	Slc38a6	Six1
chr9	63641904	63643068	Smad6	Iqch	Smad3
chrX	71268852	71269905	Mir5132
chr13	3776231	3777296	Asb13
chr11	49130604	49131049	Olfr10
chr19	46523643	46524041	As3mt	Cnnm2	2010012O05Rik	Trim8	D19Wsu162e	Cuedc2
chr16	27523744	27524264	Ccdc50
chr2	131698158	131698910	Prnd	Prnp	Slc23a2
chr3	105693324	105694820	Ovgp1	Wdr77
chr7	117146303	117146914	Tmem41b	Ipo7	Swap70	Dennd5a
chr14	66160832	66162379	Zfp395	Pnoc	Elp3
chr9	70105177	70106050	Rnf111	Ccnb2	Adam10
chr2	80089130	80089975	Pde1a	Gm13689
chr11	46215202	46216110	Fam71b
chr6	113613648	113614499	Tmem111
chr15	27951113	27952181	Fam105a	Trio
chr7	112182478	112182869	Olfr676
chr11	87240811	87241619	Tex14
chr15	41616924	41618591	Oxr1
chr12	70280779	70281516	Mgat2
chr7	112201944	112203067	Olfr677
chr18	38097499	38098156	Diaph1
chr14	49495106	49496042	4933429O19Rik
chr18	60683349	60683835	Dctn4
chr9	98388054	98388820	Rbp2
chr7	3457475	3458009	Prpf31	Cacng8	Cacng7	Cnot3	Tmc4
chr10	128132777	128134187	Rab5b
chr4	15938939	15939909	Ripk2	Gm11874	Nbn
chr11	100979193	100980247	Tubg1
chr6	128346696	128347294	Nrip2
chr4	48592689	48593675	Tmeff1
chr7	88199760	88200530	Alpk3
chr5	103194098	103195098	Arhgap24

## Sheet: MYT1L_PFC_E14_Active_Enhancer
Chr	Start	End	Gene Name
chr13	97909781	97911757	Nsa2
chr5	77838292	77839047	Igfbp7
chr7	67243546	67244815	Snrpn
chr4	82092565	82093006	Nfib	Zdhhc21
chr12	36102937	36103751	Ahr
chr1	132915679	132916208	Il10
chr9	57433570	57433858	Ulk3
chr14	64343785	64344498	Mir598
chr2	5613783	5615412	Camk1d
chr5	67818928	67820270	Bend4
chr11	32012232	32012665	Bod1	Cpeb4	4930524B15Rik	Nsg2	Snrnp25	Rhbdf1	Mpg	Nprl3	Hba	Hba	Hbq1b	Sh3pxd2b	Ubtd2	Fbxw11
chr1	24228997	24229908	1110058L19Rik	Col9a1
chr7	134189925	134190382	Kif22
chr10	68165191	68166198	Tmem26
chr9	27109058	27111309	Jam3	Igsf9b
chr1	64066414	64067819	Klf7
chr11	118897895	118898225	Eif4a3
chr1	154729841	154730326	Smg7
chr15	95487550	95488462	Dbx2
chr5	67697843	67698361	Slc30a9
chr13	83654823	83661140	Mef2c
chr15	83997638	83998824	Pnpla3
chr3	108356604	108359710	Scarna2
chr2	28387150	28387923	Ralgds
chr9	41011834	41012408	1700063D05Rik
chr11	67588661	67588977	Glp2r
chr1	50980220	50981903	Tmeff2
chr19	22978901	22979593	Smc5
chr16	31189120	31189633	AI480653
chr16	77408951	77409736	Mir99a	Mirlet7c
chr11	4661160	4662654	Uqcr10	Zmat5	Cabp7	Nf2	Nipsnap1	Thoc5	Ap1b1	Rhbdd3	Ewsr1
chr2	145383105	145383646	Gm14092
chr2	142731142	142732532	Kif16b
chr5	142879642	142880670	C330006K01Rik
chr11	54776699	54777616	Tnip1
chr10	5234639	5235658	AC161829.1
chr16	84369037	84369626	4930553E22Rik
chr7	28952707	28954175	Fbl
chr6	115890619	115892068	H1foo
chr9	121506491	121507203	Deb1	Cck	E530011L22Rik
chr5	92933191	92933980	Cdkl2	Nup54	Scarb2	Stbd1	Shroom3	Cxcl10	Cxcl11	Art3
chr11	105835818	105836774	Ace
chr3	62412573	62413054	Gpr149
chr1	97614666	97615884	4930598F16Rik
chr4	141857411	141858297	Tmem51	Kazn
chr5	9661803	9662484	Grm3
chr16	17024167	17024991	Ccdc116	1700056N10Rik	Top3b	Igll1	Ppm1f	Ppil2	Hic2	Gm15585	Sdf2l1
chr11	86839853	86841069	Gm9378	1200011M11Rik	Trim37	Fam33a
chr3	137647266	137648305	Dapp1
chr12	33061695	33062055	Ccdc71l
chr11	31770864	31771276	Cpeb4
chr17	26693319	26694317	Ergic1
chr11	98261102	98261586	Pgap3
chr18	60779504	60781158	Dctn4	Cd74	Rbm22	Tcof1	BC023105	Gm8731
chr2	130469098	130469749	Lzts3
chr10	75700844	75701954	Prmt2
chr1	43501456	43503255	Nck2
chr8	11627840	11628934	Carkd	Cars2	Ing1	Arhgef7
chr15	66679956	66680975	Ndrg1	Wisp1
chr3	17846942	17848835	Cypt12
chr9	20682672	20683396	Ubl5	Fbxl12	Olfm2	Col5a3	Angptl6	Ppan	Eif3g	Dnmt1	S1pr2	Mrpl4	Icam1	Fdx1l	Raver1	Pin1	Gm20603	Cdc37	Slc44a2	Zfp846	Icam4	Gm17470
chr12	16855730	16856475	Pqlc3	Lpin1	Pdia6	E2f6
chr5	38871203	38871481	Slc2a9
chr18	60824298	60825360	U6	Rps14	Ndst1	Tcof1	2010002N04Rik
chr3	144424889	144425583	Clca3a1
chr9	58066492	58066834	Mir6385
chr11	113611891	113612596	Cdc42ep4
chr15	79763866	79765454	Cbx7
chr4	138691022	138691979	Minos1
chr19	58829891	58830301	Pnliprp2
chr9	64228459	64229583	Megf11
chr11	118759022	118759322	Rbfox3	Cbx2	Cbx8	Cbx4	Tbc1d16	Ccdc40	Gaa	Eif4a3
chr11	5165503	5166096	Kremen1
chr5	124173212	124174344	Zcchc8
chr12	74450048	74450729	Trmt5	Slc38a6	Six4
chr6	28781283	28782124	Lrrc4
chr16	34441673	34442072	Kalrn	Ccdc14	Mylk
chr12	76280365	76281666	Kcnh5
chr1	160291991	160292803	Astn1
chr9	103558183	103559040	Cdv3	Tmem108
chr4	119098367	119099455	Ppcs
chr8	73131929	73132857	Ssbp4
chr11	115673145	115674956	Tsen54
chr2	156665169	156666362	Tgif2
chr17	27642211	27643569	Grm4
chr9	57932507	57933191	Arid3b	Ubl7	Sema7a	Cyp11a1	Stra6	Ccdc33	Islr	Islr2	Pml	Loxl1
chr15	37725441	37725823	Ncald
chr12	76282075	76282572	Kcnh5
chr1	194675384	194676605	Hhat	Sertad4	Gm15867
chr18	21157670	21159615	Rnf138
chr13	98728982	98730259	Btf3
chr16	33464545	33465198	Itgb5
chr7	96574928	96575439	AI314278
chr13	89882683	89883217	Vcan
chr2	129627005	129628511	4932416H05Rik
chr1	127439459	127440320	Actr3
chr1	175300356	175300954	Cadm3
chr2	166271530	166271931	5031425F14Rik
chr1	194681916	194682501	Sertad4
chr6	38786725	38787337	Hipk2
chr13	76194509	76195043	Gpr150
chr12	3887317	3888296	Dnmt3a
chr9	113939258	113939957	Fbxl2
chr11	117127677	117128307	2022-09-09
chr5	9662757	9664425	Grm3
chr18	76259177	76260451	2900057B20Rik
chr12	82252065	82253109	Slc8a3
chr4	13715615	13717041	Runx1t1
chr1	164590341	164590778	7420461P10Rik
chr18	60715286	60715811	Rbm22
chr2	101983250	101984623	Gm13919	Commd9	Trim44
chr3	55315204	55316721	Mab21l1
chr17	87369035	87370088	Ttc7
chr1	132623589	132624103	AA986860
chr1	158407951	158409010	Soat1
chr12	111829076	111830111	B930059L03Rik
chr11	98954901	98955230	Tns4
chr5	54100661	54101708	Cckar
chr10	90627725	90628001	Ikbip
chr7	18941852	18942493	Psg18
chr2	90955120	90957365	Mybpc3
chr5	53162352	53162822	Zcchc4
chr12	31754181	31757030	Fam110c
chr19	40371258	40372695	Sorbs1
chr9	75242894	75244010	4933433G15Rik
chr4	33520593	33521517	Mir8118
chr18	67497898	67498656	Cidea
chr13	105016678	105017040	Cenpk
chr10	116402119	116405831	Lrrc10	Gm239	Mdm2	Cct2	Frs2	Rab3ip	Yeats4	Lyz2
chr11	50049875	50050158	Gm12194	Gm12196	Adamts2	Gm16641
chr18	10734724	10735875	Snrpd1	Esco1
chr8	13605446	13606859	Fam70b	Rasa3	Zfp828	Gas6	1700029H14Rik	Dcun1d2	Gm7676	Cdc16	Grk1
chr9	51305383	51305723	Arhgap20	Mir34b
chr17	6005596	6006801	Synj2
chr1	158547058	158548410	Tor3a	Fam20b	Abl2	Gm10031
chr10	110939099	110939631	Phlda1
chr15	79766729	79767451	Cbx7
chr16	18143988	18144745	Dgcr2	Tssk2	Slc25a1	Vpreb2	Dgcr6	Prodh	Rtn4r	Zdhhc8	Trmt2a	Ranbp1	Dgcr8	D16H22S680E	Arvcf	Txnrd2
chr10	99476211	99476982	Kitl
chr18	23571792	23572604	Dtna
chr9	64231124	64233076	Megf11
chr1	66364881	66366007	Map2
chr19	7291990	7293247	Cox8a
chr1	193449417	193449978	Nek2	Lpgat1	Ppp2r5a	Dtl
chr1	42773790	42774066	Pantr2
chr15	72851509	72851841	Trappc9	Chrac1	Eif2c2
chr2	156233286	156234144	Spag4	Rbm12	Romo1	Nfs1	Rbm39	4921517L17Rik	Scand1	Epb4.1l1	0610011L14Rik	Dlgap4	1110008F13Rik
chr11	106815271	106816361	Ddx5	Kpna2	Gm11717	Nol11	Polg2
chr5	122798821	122800100	Vps29
chr8	11414235	11415235	Col4a2	Col4a1	Carkd	Cars2	Ing1	Ankrd10	Arhgef7
chr12	5273542	5274627	0610009D07Rik	Klhl29
chr1	13196543	13197783	Tram1
chr2	6795242	6796190	Celf2	Gm10115
chr1	194685719	194686688	Sertad4
chr9	123384049	123385408	Limd1
chr2	29647663	29648320	Trub2
chr18	69665692	69668473	Tcf4
chr13	89881307	89882080	Vcan
chr17	5286979	5287873	Arid1b	5730437N04Rik	Zdhhc14
chr15	10747894	10748610	Amacr
chr10	126935754	126936560	Stac3
chr5	110562445	110563479	Chfr
chr3	95027193	95028166	Cdc42se1
chr6	40392744	40393808	Wee2
chr5	148965064	148967279	Mtus2	Slc7a1
chr3	107793682	107794012	Gstm2
chr11	4497161	4497980	Mtmr3
chr15	38011930	38012973	Ubr5
chr10	128344005	128345730	Cd63
chr1	158405573	158406848	Soat1
chr2	52713360	52715902	Fmnl2
chr11	60232892	60233555	Atpaf2
chr2	32816580	32817536	Rpl12
chr1	134273384	134274491	Nuak2	Gm7241	Tmcc2	Tmem81	Gm15849
chr14	21521968	21525047	Zswim8
chr16	31896581	31897553	Dlg1	Mfi2	Pigz	Ncbp2	Senp5	Pak2	Pigx	1500031L02Rik
chr6	134449870	134451367	Cdkn1b
chr13	113821904	113822901	Cdc20b
chr10	107339251	107340854	Ppp1r12a
chr16	91962262	91962597	Dnajc28	Son	Cryzl1	Itsn1	Atp5o	Mrps6	Slc5a3	Fam165b	Donson
chr17	56445261	56445973	Lonp1	Mpnd	Plin4	Tnfaip8l1	Kdm4b	Stap2	Uhrf1
chr14	21553154	21554205	Ndst2
chr17	3248682	3250577	Scaf8	Tiam2
chr11	55016454	55017756	Slc36a1
chr18	37851808	37852710	Pcdhga5
chr14	66833293	66833781	Ptk2b
chr5	38870417	38870702	Tmem128	Gm15796	Wdr1	U4
chr17	5138279	5139766	Arid1b	5730437N04Rik
chr18	37847882	37848623	Pcdhgb2
chr3	108854994	108856474	4921515J06Rik	Fam102b
chr11	115684737	115685588	Llgl2
chr11	6177967	6179724	Tmed4
chr7	30009455	30010508	Eif3k	Map4k1	Ryr1	Rasgrp4	Fam98c	Spred3	Ggn	Psmd8	Catsperg1	Kcnk6	Yif1b	2200002D01Rik	Spint2	Ppp1r14a	Dpf1
chr7	127815658	127816023	Pdzd9
chr2	62322879	62323901	Gcg
chr4	98758836	98759408	Dock7
chr16	37675913	37676550	Fstl1	Gpr156
chr14	21367066	21370175	Ppp3cb
chr3	89858388	89859260	Ubap2l
chr18	60719805	60720603	Rbm22
chr3	104597024	104597588	Fam19a3	Ppm1j
chr2	181119174	181121694	U1	Zbtb46	Prpf6
chr12	71747675	71749773	Actr10	Tmx1
chr17	5284977	5286612	5730437N04Rik	Zdhhc14	Arid1b
chr6	135206647	135207751	Gsg1
chr1	160286136	160287506	Brinp2
chr17	87501643	87503230	Socs5
chr15	12214218	12216026	Golph3	Zfr	Mtmr12
chr10	87666695	87667304	Pmch	Ccdc53
chr9	66863262	66863857	Ppp1r2
chr12	71954312	71954898	Frmd6	Psma3	3110056K07Rik
chr18	24112201	24113279	Zfp397
chr15	83957223	83957943	Pnpla5
chr7	87925676	87926512	Crtc3	Sec11a	Zscan2	Gm17257	Wdr73
chr11	83394764	83395458	E230016K23Rik
chr7	133793449	133794015	Sbk1	Nfatc2ip	Rabep2	Sh2b1	Tufm	Atxn2l	Eif3c	Cln3	Nupr1	Ccdc101	Sult1a1	Bola2	Coro1a	Mapk3	Gdpd3	Ypel3	Ppp4c	Aldoa	Fam57b	Doc2a	Hirip3	Taok2	Tmem219	Kctd13	Asphd1	2900092E17Rik	Prrt2	Ino80e	Apobr	Maz
chr7	141568128	141569420	D7Ertd443e
chr9	121667569	121668130	Zfp651
chr11	106822221	106824217	Nol11	Ccdc45	Polg2
chr11	106817134	106819252	1810010H24Rik
chr14	66854510	66855998	Ephx2	1700001G11Rik
chr6	113024791	113025412	Setd5
chr16	34560557	34561057	Kalrn	Ccdc14	Mylk
chr17	66232236	66234251	Vapa	Ppp4r1	Ralbp1	Twsg1	Ankrd12	Ndufv2	Ddx11	ORF19
chr6	112880128	112880619	Rad18	Srgap3	Thumpd3	Setd5	Lhfpl4	Mtmr14	Ogg1	Arpc4	Gt(ROSA)26Sor	Camk1
chr3	138864155	138864486	Stpg2
chr10	20668196	20668946	Ahi1
chr7	127813716	127814681	Pdzd9
chr6	28537736	28538659	Arf5	Zfp800	Calu	Gcc1
chr7	133768319	133769021	Nupr1
chr17	80772328	80773596	Gm10190
chr1	193447520	193448090	Nek2	Lpgat1	Ppp2r5a	Dtl
chr5	31750672	31751343	Zfp512
chr6	31171243	31171827	Lncpint
chr2	102598924	102600272	Trim44	Pdhx	Apip
chr16	17496797	17497120	Hic2	Tmem191c	Snap29	Pi4ka	Crkl	Aifm3	Lztr1	Thap7	P2rx6	Slc7a4	Smpd4	Ccdc74a
chr3	101095724	101096297	Cd2
chr14	71000162	71001218	Fam160b2
chr6	125160659	125162099	Vamp1
chr12	72239026	72240469	Timm9
chr12	82253391	82254598	Slc8a3
chr16	42717726	42718627	Zbtb20
chr11	115669848	115671195	Ict1	Atp5h	Armc7	Hn1	Sumo2	Nup85	Mrps7	Gga3	Slc25a19	Grb2	Caskin2	Tsen54	Recql5	H3f3b	Unk	Wbp2	Galk1	U6	Nt5c
chr10	99477263	99477818	Kitl
chr8	111185047	111185911	Zfhx3
chr13	103805841	103806664	Mast4
