# Supplementary material for: MYT1L is required for suppressing earlier neuronal development programs in the adult mouse brain
Source: Genome Res. 2023 Apr;33(4):541–56. doi: 10.1101/gr.277413.122 (PMC10234307; doi:10.1101/gr.277413.122)
Supplement: Supplemental Material [file supp_gr.277413.122_Supplemental_Table_S6.xlsx]

## Sheet: de_h3k27ac_after_RUVr
Supplemental Table S6. Differential Enrichment Analysis on Histone Modifications
	genes	logFC	logCPM	LR	PValue	FDR
wt_h3k27ac.q.05_peak_28715	wt_h3k27ac.q.05_peak_28715	-6.81379	1.83795	57.8208	2.87118e-14	1.81117e-09
wt_h3k27ac.q.05_peak_41293	wt_h3k27ac.q.05_peak_41293	-2.59397	2.71237	50.1746	1.4066e-12	4.43649e-08
wt_h3k27ac.q.05_peak_67710	wt_h3k27ac.q.05_peak_67710	0.417818	7.24145	45.5596	1.48064e-11	3.11334e-07
wt_h3k27ac.q.05_peak_13272	wt_h3k27ac.q.05_peak_13272	-2.05117	3.01377	44.5534	2.4751e-11	3.90329e-07
wt_h3k27ac.q.05_peak_31377	wt_h3k27ac.q.05_peak_31377	-2.41053	2.5749	40.628	1.84151e-10	2.32328e-06
wt_h3k27ac.q.05_peak_79969	wt_h3k27ac.q.05_peak_79969	0.738813	5.35948	38.3704	5.85142e-10	5.32906e-06
wt_h3k27ac.q.05_peak_46354	wt_h3k27ac.q.05_peak_46354	-2.29841	2.59085	38.3497	5.91357e-10	5.32906e-06
wt_h3k27ac.q.05_peak_17272	wt_h3k27ac.q.05_peak_17272	-2.57555	2.34984	37.3733	9.75474e-10	7.69174e-06
wt_h3k27ac.q.05_peak_63612	wt_h3k27ac.q.05_peak_63612	1.06213	4.33119	35.5629	2.46952e-09	1.73089e-05
wt_h3k27ac.q.05_peak_46679	wt_h3k27ac.q.05_peak_46679	-1.94713	2.81096	35.1345	3.077e-09	1.941e-05
wt_h3k27ac.q.05_peak_79985	wt_h3k27ac.q.05_peak_79985	-2.40349	2.34984	33.8631	5.91291e-09	3.39084e-05
wt_h3k27ac.q.05_peak_22154	wt_h3k27ac.q.05_peak_22154	-2.46938	2.27287	33.1033	8.73896e-09	4.59385e-05
wt_h3k27ac.q.05_peak_81736	wt_h3k27ac.q.05_peak_81736	-1.88854	2.76953	32.3874	1.26305e-08	6.077e-05
wt_h3k27ac.q.05_peak_42432	wt_h3k27ac.q.05_peak_42432	-2.78677	2.03727	32.2599	1.34871e-08	6.077e-05
wt_h3k27ac.q.05_peak_5314	wt_h3k27ac.q.05_peak_5314	-1.90392	2.7124	31.4032	2.09632e-08	8.65641e-05
wt_h3k27ac.q.05_peak_57285	wt_h3k27ac.q.05_peak_57285	-2.75389	2.01381	31.1421	2.39808e-08	8.65641e-05
wt_h3k27ac.q.05_peak_20518	wt_h3k27ac.q.05_peak_20518	-2.75389	2.0138	31.1421	2.3981e-08	8.65641e-05
wt_h3k27ac.q.05_peak_49780	wt_h3k27ac.q.05_peak_49780	0.704774	5.1892	31.0847	2.47008e-08	8.65641e-05
wt_h3k27ac.q.05_peak_36900	wt_h3k27ac.q.05_peak_36900	-1.62816	3.03722	30.9764	2.61183e-08	8.67141e-05
wt_h3k27ac.q.05_peak_11961	wt_h3k27ac.q.05_peak_11961	-1.78612	2.8245	30.8154	2.83771e-08	8.95029e-05
wt_h3k27ac.q.05_peak_67725	wt_h3k27ac.q.05_peak_67725	0.392143	6.84246	30.6924	3.0234e-08	9.08185e-05
wt_h3k27ac.q.05_peak_3666	wt_h3k27ac.q.05_peak_3666	-1.82188	2.96568	30.3029	3.69577e-08	0.00010597
wt_h3k27ac.q.05_peak_11098	wt_h3k27ac.q.05_peak_11098	-2.38428	2.21235	29.9595	4.41158e-08	0.000120994
wt_h3k27ac.q.05_peak_35372	wt_h3k27ac.q.05_peak_35372	0.61526	5.48637	29.3509	6.03873e-08	0.000158721
wt_h3k27ac.q.05_peak_44935	wt_h3k27ac.q.05_peak_44935	0.251175	8.09815	29.2238	6.44832e-08	0.000162707
wt_h3k27ac.q.05_peak_20561	wt_h3k27ac.q.05_peak_20561	1.11384	3.86462	29.0112	7.19626e-08	0.000169503
wt_h3k27ac.q.05_peak_32749	wt_h3k27ac.q.05_peak_32749	-2.51752	2.17052	28.9954	7.25507e-08	0.000169503
wt_h3k27ac.q.05_peak_78220	wt_h3k27ac.q.05_peak_78220	-1.48408	3.15983	28.4642	9.54475e-08	0.000215033
wt_h3k27ac.q.05_peak_33283	wt_h3k27ac.q.05_peak_33283	0.376597	6.84326	28.3421	1.01662e-07	0.000221136
wt_h3k27ac.q.05_peak_68840	wt_h3k27ac.q.05_peak_68840	0.516117	5.91148	27.9185	1.26537e-07	0.000262607
wt_h3k27ac.q.05_peak_45638	wt_h3k27ac.q.05_peak_45638	0.394887	6.67774	27.8232	1.32924e-07	0.000262607
wt_h3k27ac.q.05_peak_83068	wt_h3k27ac.q.05_peak_83068	-1.31505	3.40499	27.8189	1.33216e-07	0.000262607
wt_h3k27ac.q.05_peak_39245	wt_h3k27ac.q.05_peak_39245	-3.30027	2.21235	27.6578	1.44785e-07	0.000276763
wt_h3k27ac.q.05_peak_26483	wt_h3k27ac.q.05_peak_26483	0.874486	4.42755	27.5254	1.55046e-07	0.000287661
wt_h3k27ac.q.05_peak_71725	wt_h3k27ac.q.05_peak_71725	-1.2075	3.56684	26.9846	2.05088e-07	0.000341877
wt_h3k27ac.q.05_peak_9203	wt_h3k27ac.q.05_peak_9203	0.578532	5.80277	26.9457	2.09248e-07	0.000341877
wt_h3k27ac.q.05_peak_56965	wt_h3k27ac.q.05_peak_56965	-1.79601	2.63765	26.9207	2.11981e-07	0.000341877
wt_h3k27ac.q.05_peak_67786	wt_h3k27ac.q.05_peak_67786	-1.47813	3.07175	26.8739	2.17177e-07	0.000341877
wt_h3k27ac.q.05_peak_68218	wt_h3k27ac.q.05_peak_68218	-1.05443	3.9032	26.8214	2.23157e-07	0.000341877
wt_h3k27ac.q.05_peak_60539	wt_h3k27ac.q.05_peak_60539	0.573176	5.55494	26.7966	2.26037e-07	0.000341877
wt_h3k27ac.q.05_peak_55908	wt_h3k27ac.q.05_peak_55908	-0.928996	4.23275	26.7825	2.27687e-07	0.000341877
wt_h3k27ac.q.05_peak_23728	wt_h3k27ac.q.05_peak_23728	-2.20852	2.21236	26.7185	2.35353e-07	0.000341877
wt_h3k27ac.q.05_peak_82408	wt_h3k27ac.q.05_peak_82408	-1.86973	2.54249	26.7078	2.36669e-07	0.000341877
wt_h3k27ac.q.05_peak_35007	wt_h3k27ac.q.05_peak_35007	-1.66076	2.7973	26.6932	2.38465e-07	0.000341877
wt_h3k27ac.q.05_peak_77913	wt_h3k27ac.q.05_peak_77913	-2.13419	2.27289	26.621	2.47533e-07	0.000346992
wt_h3k27ac.q.05_peak_12731	wt_h3k27ac.q.05_peak_12731	-1.10692	3.76954	26.4804	2.66231e-07	0.000358732
wt_h3k27ac.q.05_peak_28289	wt_h3k27ac.q.05_peak_28289	0.473529	6.08052	26.4728	2.67282e-07	0.000358732
wt_h3k27ac.q.05_peak_3659	wt_h3k27ac.q.05_peak_3659	-1.77561	2.75549	26.3486	2.85025e-07	0.000374577
wt_h3k27ac.q.05_peak_30016	wt_h3k27ac.q.05_peak_30016	0.572628	5.5242	26.1792	3.11161e-07	0.000400579
wt_h3k27ac.q.05_peak_67724	wt_h3k27ac.q.05_peak_67724	0.371027	6.76203	26.0385	3.3468e-07	0.000422239
wt_h3k27ac.q.05_peak_40680	wt_h3k27ac.q.05_peak_40680	-1.84564	2.52601	25.8081	3.77096e-07	0.000466424
wt_h3k27ac.q.05_peak_838	wt_h3k27ac.q.05_peak_838	-2.04097	2.31188	25.6133	4.17155e-07	0.000506049
wt_h3k27ac.q.05_peak_76245	wt_h3k27ac.q.05_peak_76245	-1.00281	3.96565	25.5376	4.33848e-07	0.000516369
wt_h3k27ac.q.05_peak_28809	wt_h3k27ac.q.05_peak_28809	-2.03322	2.49242	25.3653	4.74367e-07	0.000554139
wt_h3k27ac.q.05_peak_50819	wt_h3k27ac.q.05_peak_50819	0.76037	5.1813	25.3079	4.887e-07	0.000560503
wt_h3k27ac.q.05_peak_52247	wt_h3k27ac.q.05_peak_52247	1.07648	3.75566	25.1495	5.3054e-07	0.000593094
wt_h3k27ac.q.05_peak_61847	wt_h3k27ac.q.05_peak_61847	0.499041	5.85486	25.1236	5.37702e-07	0.000593094
wt_h3k27ac.q.05_peak_81353	wt_h3k27ac.q.05_peak_81353	0.589362	5.38253	25.0965	5.45322e-07	0.000593094
wt_h3k27ac.q.05_peak_52105	wt_h3k27ac.q.05_peak_52105	0.200997	8.54725	25.0299	5.64475e-07	0.00060352
wt_h3k27ac.q.05_peak_46935	wt_h3k27ac.q.05_peak_46935	0.541367	5.61471	24.9687	5.82671e-07	0.000612592
wt_h3k27ac.q.05_peak_8470	wt_h3k27ac.q.05_peak_8470	-0.940427	4.09981	24.916	5.98831e-07	0.00061926
wt_h3k27ac.q.05_peak_25813	wt_h3k27ac.q.05_peak_25813	-2.23026	2.10544	24.8495	6.19852e-07	0.000630659
wt_h3k27ac.q.05_peak_3874	wt_h3k27ac.q.05_peak_3874	0.973054	4.03743	24.7168	6.64015e-07	0.000653773
wt_h3k27ac.q.05_peak_33280	wt_h3k27ac.q.05_peak_33280	0.356059	6.99704	24.7031	6.68777e-07	0.000653773
wt_h3k27ac.q.05_peak_17703	wt_h3k27ac.q.05_peak_17703	0.818242	4.45395	24.689	6.73662e-07	0.000653773
wt_h3k27ac.q.05_peak_25340	wt_h3k27ac.q.05_peak_25340	0.603305	5.29033	24.6344	6.9302e-07	0.000662369
wt_h3k27ac.q.05_peak_70662	wt_h3k27ac.q.05_peak_70662	-2.53911	1.86443	24.5644	7.18674e-07	0.000676575
wt_h3k27ac.q.05_peak_28588	wt_h3k27ac.q.05_peak_28588	0.403027	6.43433	24.536	7.29333e-07	0.000676575
wt_h3k27ac.q.05_peak_347	wt_h3k27ac.q.05_peak_347	0.647749	5.07766	24.3893	7.87035e-07	0.000719521
wt_h3k27ac.q.05_peak_10762	wt_h3k27ac.q.05_peak_10762	0.923513	4.10563	24.2581	8.42532e-07	0.000759254
wt_h3k27ac.q.05_peak_40521	wt_h3k27ac.q.05_peak_40521	-1.39719	3.06035	24.1129	9.08508e-07	0.000807177
wt_h3k27ac.q.05_peak_9654	wt_h3k27ac.q.05_peak_9654	0.7363	4.70529	24.0712	9.28379e-07	0.000813376
wt_h3k27ac.q.05_peak_25899	wt_h3k27ac.q.05_peak_25899	-1.62195	2.71241	24.0105	9.58099e-07	0.000815967
wt_h3k27ac.q.05_peak_23833	wt_h3k27ac.q.05_peak_23833	-2.29203	2.01381	24.0021	9.62306e-07	0.000815967
wt_h3k27ac.q.05_peak_6108	wt_h3k27ac.q.05_peak_6108	-2.66463	1.7555	23.9222	1.00307e-06	0.000815967
wt_h3k27ac.q.05_peak_34303	wt_h3k27ac.q.05_peak_34303	-1.12404	3.59083	23.9208	1.00379e-06	0.000815967
wt_h3k27ac.q.05_peak_5979	wt_h3k27ac.q.05_peak_5979	0.438561	6.27806	23.8877	1.02122e-06	0.000815967
wt_h3k27ac.q.05_peak_50610	wt_h3k27ac.q.05_peak_50610	0.60524	5.67574	23.8819	1.02428e-06	0.000815967
wt_h3k27ac.q.05_peak_6136	wt_h3k27ac.q.05_peak_6136	0.908152	4.12764	23.8703	1.03049e-06	0.000815967
wt_h3k27ac.q.05_peak_7963	wt_h3k27ac.q.05_peak_7963	-1.8799	2.38685	23.8253	1.05485e-06	0.000815967
wt_h3k27ac.q.05_peak_50509	wt_h3k27ac.q.05_peak_50509	0.40701	6.39505	23.8184	1.05866e-06	0.000815967
wt_h3k27ac.q.05_peak_13761	wt_h3k27ac.q.05_peak_13761	-1.64694	2.66802	23.8147	1.06069e-06	0.000815967
wt_h3k27ac.q.05_peak_75939	wt_h3k27ac.q.05_peak_75939	-1.92884	2.33099	23.7587	1.09201e-06	0.000816596
wt_h3k27ac.q.05_peak_61506	wt_h3k27ac.q.05_peak_61506	-0.886537	4.48808	23.7565	1.09327e-06	0.000816596
wt_h3k27ac.q.05_peak_68872	wt_h3k27ac.q.05_peak_68872	-1.1447	3.52599	23.7319	1.10731e-06	0.000816596
wt_h3k27ac.q.05_peak_42296	wt_h3k27ac.q.05_peak_42296	-1.98368	2.27289	23.7216	1.11329e-06	0.000816596
wt_h3k27ac.q.05_peak_53353	wt_h3k27ac.q.05_peak_53353	-1.67402	2.62223	23.6296	1.16777e-06	0.000846716
wt_h3k27ac.q.05_peak_42611	wt_h3k27ac.q.05_peak_42611	0.530349	5.58913	23.5566	1.21296e-06	0.000869483
wt_h3k27ac.q.05_peak_73605	wt_h3k27ac.q.05_peak_73605	-1.07996	3.66047	23.5065	1.24496e-06	0.000878977
wt_h3k27ac.q.05_peak_39918	wt_h3k27ac.q.05_peak_39918	-2.49998	1.83796	23.4924	1.25407e-06	0.000878977
wt_h3k27ac.q.05_peak_61936	wt_h3k27ac.q.05_peak_61936	-2.3929	2.08306	23.4304	1.29519e-06	0.000897821
wt_h3k27ac.q.05_peak_17254	wt_h3k27ac.q.05_peak_17254	-1.3972	3.06034	23.3886	1.32364e-06	0.000901794
wt_h3k27ac.q.05_peak_63066	wt_h3k27ac.q.05_peak_63066	-0.993412	3.90318	23.38	1.32951e-06	0.000901794
wt_h3k27ac.q.05_peak_9449	wt_h3k27ac.q.05_peak_9449	-1.73561	2.52603	23.2972	1.38803e-06	0.000921719
wt_h3k27ac.q.05_peak_64862	wt_h3k27ac.q.05_peak_64862	-1.7356	2.52599	23.2971	1.38811e-06	0.000921719
wt_h3k27ac.q.05_peak_13780	wt_h3k27ac.q.05_peak_13780	-2.36693	1.91597	23.1909	1.4669e-06	0.000963891
wt_h3k27ac.q.05_peak_53307	wt_h3k27ac.q.05_peak_53307	1.05623	3.67571	22.8953	1.71071e-06	0.00108699
wt_h3k27ac.q.05_peak_28457	wt_h3k27ac.q.05_peak_28457	-2.16372	2.06036	22.8572	1.7449e-06	0.00108699
wt_h3k27ac.q.05_peak_8439	wt_h3k27ac.q.05_peak_8439	-1.53573	2.76954	22.8288	1.77095e-06	0.00108699
wt_h3k27ac.q.05_peak_71600	wt_h3k27ac.q.05_peak_71600	0.489953	5.76805	22.8171	1.78172e-06	0.00108699
wt_h3k27ac.q.05_peak_24345	wt_h3k27ac.q.05_peak_24345	0.513215	5.636	22.8124	1.7861e-06	0.00108699
wt_h3k27ac.q.05_peak_57345	wt_h3k27ac.q.05_peak_57345	-1.65071	2.60663	22.792	1.80511e-06	0.00108699
wt_h3k27ac.q.05_peak_32943	wt_h3k27ac.q.05_peak_32943	-1.6507	2.60662	22.792	1.80514e-06	0.00108699
wt_h3k27ac.q.05_peak_16000	wt_h3k27ac.q.05_peak_16000	-1.95417	2.25301	22.7876	1.8093e-06	0.00108699
wt_h3k27ac.q.05_peak_50847	wt_h3k27ac.q.05_peak_50847	-1.95417	2.253	22.7876	1.80932e-06	0.00108699
wt_h3k27ac.q.05_peak_4323	wt_h3k27ac.q.05_peak_4323	0.789586	4.43639	22.7642	1.83147e-06	0.00108992
wt_h3k27ac.q.05_peak_26750	wt_h3k27ac.q.05_peak_26750	-1.73397	2.72692	22.6401	1.95364e-06	0.00115175
wt_h3k27ac.q.05_peak_27851	wt_h3k27ac.q.05_peak_27851	-1.98378	2.27291	22.559	2.03789e-06	0.0011903
wt_h3k27ac.q.05_peak_26769	wt_h3k27ac.q.05_peak_26769	0.948846	4.27305	22.496	2.10576e-06	0.00121093
wt_h3k27ac.q.05_peak_959	wt_h3k27ac.q.05_peak_959	0.739608	4.60685	22.4661	2.13887e-06	0.00121093
wt_h3k27ac.q.05_peak_57982	wt_h3k27ac.q.05_peak_57982	-1.15752	3.42288	22.4523	2.15427e-06	0.00121093
wt_h3k27ac.q.05_peak_32593	wt_h3k27ac.q.05_peak_32593	0.685115	4.80435	22.4453	2.16212e-06	0.00121093
wt_h3k27ac.q.05_peak_82240	wt_h3k27ac.q.05_peak_82240	-1.71067	2.50932	22.439	2.1692e-06	0.00121093
wt_h3k27ac.q.05_peak_30058	wt_h3k27ac.q.05_peak_30058	-1.57781	2.68298	22.3786	2.23859e-06	0.0012387
wt_h3k27ac.q.05_peak_28840	wt_h3k27ac.q.05_peak_28840	-2.45978	1.81102	22.2835	2.35225e-06	0.00129028
wt_h3k27ac.q.05_peak_46605	wt_h3k27ac.q.05_peak_46605	-2.32884	1.89044	22.1568	2.51259e-06	0.00136635
wt_h3k27ac.q.05_peak_29774	wt_h3k27ac.q.05_peak_29774	-2.47545	1.98996	22.1331	2.54391e-06	0.001369
wt_h3k27ac.q.05_peak_32019	wt_h3k27ac.q.05_peak_32019	0.319122	6.96288	22.1203	2.56087e-06	0.001369
wt_h3k27ac.q.05_peak_7129	wt_h3k27ac.q.05_peak_7129	-1.8248	2.34985	22.0268	2.68875e-06	0.00142529
wt_h3k27ac.q.05_peak_40715	wt_h3k27ac.q.05_peak_40715	-2.47562	1.98997	21.9761	2.76062e-06	0.00145119
wt_h3k27ac.q.05_peak_70770	wt_h3k27ac.q.05_peak_70770	-1.23881	3.22261	21.9169	2.84713e-06	0.00147445
wt_h3k27ac.q.05_peak_82393	wt_h3k27ac.q.05_peak_82393	-0.803892	4.3357	21.8648	2.92547e-06	0.00147445
wt_h3k27ac.q.05_peak_37011	wt_h3k27ac.q.05_peak_37011	-1.92403	2.23283	21.8619	2.92999e-06	0.00147445
wt_h3k27ac.q.05_peak_71224	wt_h3k27ac.q.05_peak_71224	-1.92403	2.23281	21.8618	2.93006e-06	0.00147445
wt_h3k27ac.q.05_peak_7852	wt_h3k27ac.q.05_peak_7852	-1.55593	2.72689	21.8581	2.93582e-06	0.00147445
wt_h3k27ac.q.05_peak_14981	wt_h3k27ac.q.05_peak_14981	-1.67386	2.6222	21.852	2.94512e-06	0.00147445
wt_h3k27ac.q.05_peak_75467	wt_h3k27ac.q.05_peak_75467	0.547117	5.39162	21.8257	2.98568e-06	0.00148172
wt_h3k27ac.q.05_peak_59556	wt_h3k27ac.q.05_peak_59556	-1.14363	3.41397	21.8123	3.00662e-06	0.00148172
wt_h3k27ac.q.05_peak_47862	wt_h3k27ac.q.05_peak_47862	1.36179	2.97802	21.7522	3.1023e-06	0.00151703
wt_h3k27ac.q.05_peak_46261	wt_h3k27ac.q.05_peak_46261	-1.27507	3.13834	21.687	3.20963e-06	0.00155744
wt_h3k27ac.q.05_peak_2505	wt_h3k27ac.q.05_peak_2505	0.316474	6.94602	21.5083	3.52293e-06	0.00167774
wt_h3k27ac.q.05_peak_40621	wt_h3k27ac.q.05_peak_40621	-1.47529	2.78351	21.5068	3.52583e-06	0.00167774
wt_h3k27ac.q.05_peak_47603	wt_h3k27ac.q.05_peak_47603	-1.88668	2.47535	21.4733	3.58799e-06	0.00167774
wt_h3k27ac.q.05_peak_42984	wt_h3k27ac.q.05_peak_42984	0.898773	4.00808	21.471	3.59225e-06	0.00167774
wt_h3k27ac.q.05_peak_73515	wt_h3k27ac.q.05_peak_73515	-1.03126	3.65291	21.4427	3.64555e-06	0.00167774
wt_h3k27ac.q.05_peak_82845	wt_h3k27ac.q.05_peak_82845	0.466724	5.81632	21.436	3.65847e-06	0.00167774
wt_h3k27ac.q.05_peak_15579	wt_h3k27ac.q.05_peak_15579	-1.71873	2.44062	21.4225	3.68413e-06	0.00167774
wt_h3k27ac.q.05_peak_5029	wt_h3k27ac.q.05_peak_5029	0.938475	3.89059	21.415	3.6987e-06	0.00167774
wt_h3k27ac.q.05_peak_73696	wt_h3k27ac.q.05_peak_73696	0.938474	3.89059	21.4149	3.6988e-06	0.00167774
wt_h3k27ac.q.05_peak_46076	wt_h3k27ac.q.05_peak_46076	0.789525	4.35001	21.4011	3.72566e-06	0.00167774
wt_h3k27ac.q.05_peak_47413	wt_h3k27ac.q.05_peak_47413	-0.806146	4.29736	21.3885	3.75011e-06	0.00167774
wt_h3k27ac.q.05_peak_10968	wt_h3k27ac.q.05_peak_10968	0.233561	7.83873	21.327	3.87232e-06	0.00172021
wt_h3k27ac.q.05_peak_66825	wt_h3k27ac.q.05_peak_66825	0.244549	7.69627	21.2765	3.97584e-06	0.00175208
wt_h3k27ac.q.05_peak_73032	wt_h3k27ac.q.05_peak_73032	-1.42346	2.85124	21.265	3.99961e-06	0.00175208
wt_h3k27ac.q.05_peak_67561	wt_h3k27ac.q.05_peak_67561	-0.701809	4.66041	21.1884	4.16273e-06	0.00181096
wt_h3k27ac.q.05_peak_75608	wt_h3k27ac.q.05_peak_75608	-0.692253	4.69402	21.1285	4.29489e-06	0.00185566
wt_h3k27ac.q.05_peak_30212	wt_h3k27ac.q.05_peak_30212	-2.82396	1.86445	21.1148	4.32574e-06	0.00185627
wt_h3k27ac.q.05_peak_39678	wt_h3k27ac.q.05_peak_39678	-0.79423	4.31662	21.0732	4.42073e-06	0.00188422
wt_h3k27ac.q.05_peak_31441	wt_h3k27ac.q.05_peak_31441	-1.79646	2.33101	21.0524	4.46885e-06	0.00189194
wt_h3k27ac.q.05_peak_41026	wt_h3k27ac.q.05_peak_41026	-1.51184	2.69776	21.0141	4.55926e-06	0.00191735
wt_h3k27ac.q.05_peak_29083	wt_h3k27ac.q.05_peak_29083	0.393591	6.27562	20.9985	4.59635e-06	0.00192015
wt_h3k27ac.q.05_peak_75428	wt_h3k27ac.q.05_peak_75428	-2.18344	1.94106	20.9801	4.64083e-06	0.00192597
wt_h3k27ac.q.05_peak_57374	wt_h3k27ac.q.05_peak_57374	-1.28281	3.47537	20.9558	4.70001e-06	0.00193635
wt_h3k27ac.q.05_peak_67392	wt_h3k27ac.q.05_peak_67392	-1.89325	2.21236	20.9447	4.72722e-06	0.00193635
wt_h3k27ac.q.05_peak_14442	wt_h3k27ac.q.05_peak_14442	-2.01748	2.08307	20.8721	4.91001e-06	0.00198544
wt_h3k27ac.q.05_peak_72908	wt_h3k27ac.q.05_peak_72908	-2.01748	2.08307	20.8721	4.91002e-06	0.00198544
wt_h3k27ac.q.05_peak_21194	wt_h3k27ac.q.05_peak_21194	-2.32692	2.03729	20.6121	5.62408e-06	0.0022597
wt_h3k27ac.q.05_peak_18886	wt_h3k27ac.q.05_peak_18886	-2.208	2.21233	20.549	5.81242e-06	0.00232059
wt_h3k27ac.q.05_peak_68394	wt_h3k27ac.q.05_peak_68394	-2.57602	2.06034	20.5365	5.85044e-06	0.00232108
wt_h3k27ac.q.05_peak_6272	wt_h3k27ac.q.05_peak_6272	-1.471	2.72692	20.4834	6.01518e-06	0.00235759
wt_h3k27ac.q.05_peak_57467	wt_h3k27ac.q.05_peak_57467	0.623572	4.93502	20.4824	6.01827e-06	0.00235759
wt_h3k27ac.q.05_peak_11468	wt_h3k27ac.q.05_peak_11468	-1.69195	2.42293	20.4709	6.05459e-06	0.00235759
wt_h3k27ac.q.05_peak_76698	wt_h3k27ac.q.05_peak_76698	-1.03362	3.58289	20.4581	6.0951e-06	0.0023588
wt_h3k27ac.q.05_peak_13042	wt_h3k27ac.q.05_peak_13042	-1.72777	2.36848	20.4071	6.25983e-06	0.00239324
wt_h3k27ac.q.05_peak_35416	wt_h3k27ac.q.05_peak_35416	-1.72777	2.36846	20.407	6.25997e-06	0.00239324
wt_h3k27ac.q.05_peak_54166	wt_h3k27ac.q.05_peak_54166	0.453505	5.82474	20.3716	6.37685e-06	0.00242324
wt_h3k27ac.q.05_peak_15638	wt_h3k27ac.q.05_peak_15638	1.09437	3.42307	20.3212	6.54723e-06	0.00247309
wt_h3k27ac.q.05_peak_30347	wt_h3k27ac.q.05_peak_30347	-2.01743	2.08307	20.309	6.58899e-06	0.00247405
wt_h3k27ac.q.05_peak_39205	wt_h3k27ac.q.05_peak_39205	0.267246	7.35254	20.1971	6.98575e-06	0.0026075
wt_h3k27ac.q.05_peak_19000	wt_h3k27ac.q.05_peak_19000	-0.819352	4.22253	20.1669	7.09709e-06	0.00263348
wt_h3k27ac.q.05_peak_67703	wt_h3k27ac.q.05_peak_67703	0.375841	6.69247	20.1333	7.22287e-06	0.00266448
wt_h3k27ac.q.05_peak_28663	wt_h3k27ac.q.05_peak_28663	-1.60457	2.50932	20.1151	7.29176e-06	0.00267425
wt_h3k27ac.q.05_peak_15842	wt_h3k27ac.q.05_peak_15842	0.447237	5.84484	20.0962	7.3641e-06	0.00267557
wt_h3k27ac.q.05_peak_42938	wt_h3k27ac.q.05_peak_42938	-2.22073	1.96573	20.0921	7.38018e-06	0.00267557
wt_h3k27ac.q.05_peak_67975	wt_h3k27ac.q.05_peak_67975	0.850626	4.06049	20.0693	7.46845e-06	0.00268104
wt_h3k27ac.q.05_peak_60215	wt_h3k27ac.q.05_peak_60215	-1.55435	2.60661	20.0663	7.48028e-06	0.00268104
wt_h3k27ac.q.05_peak_80195	wt_h3k27ac.q.05_peak_80195	0.416535	6.0447	20.043	7.57193e-06	0.00269856
wt_h3k27ac.q.05_peak_65549	wt_h3k27ac.q.05_peak_65549	0.44204	5.87281	20.0209	7.66012e-06	0.0027099
wt_h3k27ac.q.05_peak_50531	wt_h3k27ac.q.05_peak_50531	-1.16749	3.45806	20.0135	7.68966e-06	0.0027099
wt_h3k27ac.q.05_peak_81054	wt_h3k27ac.q.05_peak_81054	0.441041	5.8761	19.9765	7.83992e-06	0.0027475
wt_h3k27ac.q.05_peak_80771	wt_h3k27ac.q.05_peak_80771	-1.29972	3.11649	19.9624	7.89808e-06	0.00275099
wt_h3k27ac.q.05_peak_63719	wt_h3k27ac.q.05_peak_63719	-2.05094	2.10543	19.9446	7.97181e-06	0.00275099
wt_h3k27ac.q.05_peak_51897	wt_h3k27ac.q.05_peak_51897	-1.10114	3.38682	19.9282	8.04044e-06	0.00275099
wt_h3k27ac.q.05_peak_64701	wt_h3k27ac.q.05_peak_64701	-1.98303	2.06037	19.9276	8.04324e-06	0.00275099
wt_h3k27ac.q.05_peak_79265	wt_h3k27ac.q.05_peak_79265	-0.911693	3.87093	19.9103	8.1164e-06	0.00275099
wt_h3k27ac.q.05_peak_33846	wt_h3k27ac.q.05_peak_33846	0.497784	5.52624	19.9025	8.14946e-06	0.00275099
wt_h3k27ac.q.05_peak_3464	wt_h3k27ac.q.05_peak_3464	-0.971154	3.70509	19.8937	8.18692e-06	0.00275099
wt_h3k27ac.q.05_peak_41804	wt_h3k27ac.q.05_peak_41804	-0.583179	5.08298	19.8909	8.19877e-06	0.00275099
wt_h3k27ac.q.05_peak_81530	wt_h3k27ac.q.05_peak_81530	1.15587	3.25312	19.8292	8.4681e-06	0.00282633
wt_h3k27ac.q.05_peak_3062	wt_h3k27ac.q.05_peak_3062	-0.878448	3.95956	19.7785	8.6954e-06	0.00286799
wt_h3k27ac.q.05_peak_24849	wt_h3k27ac.q.05_peak_24849	-1.38246	2.82453	19.7766	8.70407e-06	0.00286799
wt_h3k27ac.q.05_peak_10277	wt_h3k27ac.q.05_peak_10277	-2.40389	1.94105	19.7711	8.72932e-06	0.00286799
wt_h3k27ac.q.05_peak_79313	wt_h3k27ac.q.05_peak_79313	0.875929	3.95977	19.7396	8.87441e-06	0.00287723
wt_h3k27ac.q.05_peak_42431	wt_h3k27ac.q.05_peak_42431	1.01946	3.86456	19.7354	8.89364e-06	0.00287723
wt_h3k27ac.q.05_peak_73365	wt_h3k27ac.q.05_peak_73365	-1.66466	2.405	19.7255	8.93988e-06	0.00287723
wt_h3k27ac.q.05_peak_69269	wt_h3k27ac.q.05_peak_69269	-1.66466	2.40499	19.7255	8.9399e-06	0.00287723
wt_h3k27ac.q.05_peak_24655	wt_h3k27ac.q.05_peak_24655	-0.929288	3.80412	19.6694	9.20642e-06	0.00294797
wt_h3k27ac.q.05_peak_12028	wt_h3k27ac.q.05_peak_12028	-2.40408	1.94106	19.6446	9.32654e-06	0.00295634
wt_h3k27ac.q.05_peak_73164	wt_h3k27ac.q.05_peak_73164	-2.6033	2.23277	19.6294	9.40124e-06	0.00295634
wt_h3k27ac.q.05_peak_56513	wt_h3k27ac.q.05_peak_56513	-1.00779	3.59081	19.6221	9.43694e-06	0.00295634
wt_h3k27ac.q.05_peak_50907	wt_h3k27ac.q.05_peak_50907	-1.33808	2.89042	19.6161	9.46681e-06	0.00295634
wt_h3k27ac.q.05_peak_29357	wt_h3k27ac.q.05_peak_29357	-1.33808	2.89042	19.6161	9.46689e-06	0.00295634
wt_h3k27ac.q.05_peak_67824	wt_h3k27ac.q.05_peak_67824	-1.87374	2.82448	19.5919	9.58731e-06	0.0029792
wt_h3k27ac.q.05_peak_43489	wt_h3k27ac.q.05_peak_43489	-1.12391	3.31186	19.5808	9.6433e-06	0.00298191
wt_h3k27ac.q.05_peak_11001	wt_h3k27ac.q.05_peak_11001	-1.69941	2.34984	19.551	9.79515e-06	0.00301409
wt_h3k27ac.q.05_peak_17034	wt_h3k27ac.q.05_peak_17034	-1.39602	2.78351	19.5004	1.00579e-05	0.00307962
wt_h3k27ac.q.05_peak_45490	wt_h3k27ac.q.05_peak_45490	-1.2984	2.95341	19.4913	1.01057e-05	0.00307962
wt_h3k27ac.q.05_peak_34266	wt_h3k27ac.q.05_peak_34266	0.432363	5.88262	19.2928	1.12131e-05	0.00336767
wt_h3k27ac.q.05_peak_78035	wt_h3k27ac.q.05_peak_78035	0.641863	4.76975	19.2884	1.12389e-05	0.00336767
wt_h3k27ac.q.05_peak_52436	wt_h3k27ac.q.05_peak_52436	0.769746	4.27307	19.287	1.12467e-05	0.00336767
wt_h3k27ac.q.05_peak_31574	wt_h3k27ac.q.05_peak_31574	-1.20105	3.12745	19.284	1.12645e-05	0.00336767
wt_h3k27ac.q.05_peak_47354	wt_h3k27ac.q.05_peak_47354	0.543165	5.23048	19.2254	1.16157e-05	0.00345627
wt_h3k27ac.q.05_peak_72506	wt_h3k27ac.q.05_peak_72506	-0.93392	3.9222	19.1958	1.17971e-05	0.00349378
wt_h3k27ac.q.05_peak_6943	wt_h3k27ac.q.05_peak_6943	-1.60642	2.44064	19.09	1.24699e-05	0.00364189
wt_h3k27ac.q.05_peak_29592	wt_h3k27ac.q.05_peak_29592	-1.60642	2.44064	19.0899	1.24701e-05	0.00364189
wt_h3k27ac.q.05_peak_35380	wt_h3k27ac.q.05_peak_35380	-1.60642	2.44062	19.0899	1.24704e-05	0.00364189
wt_h3k27ac.q.05_peak_18687	wt_h3k27ac.q.05_peak_18687	-0.490242	5.51133	19.079	1.2542e-05	0.00364591
wt_h3k27ac.q.05_peak_10721	wt_h3k27ac.q.05_peak_10721	-1.65515	2.54252	19.0665	1.26238e-05	0.00365287
wt_h3k27ac.q.05_peak_51649	wt_h3k27ac.q.05_peak_51649	-1.23711	3.03725	19.0203	1.29334e-05	0.00369433
wt_h3k27ac.q.05_peak_18188	wt_h3k27ac.q.05_peak_18188	-1.94773	2.03728	18.9925	1.31232e-05	0.00369433
wt_h3k27ac.q.05_peak_48578	wt_h3k27ac.q.05_peak_48578	-1.94773	2.03727	18.9925	1.31233e-05	0.00369433
wt_h3k27ac.q.05_peak_30957	wt_h3k27ac.q.05_peak_30957	-1.60642	2.44062	18.9825	1.31921e-05	0.00369433
wt_h3k27ac.q.05_peak_58661	wt_h3k27ac.q.05_peak_58661	-2.02068	1.96573	18.9764	1.32343e-05	0.00369433
wt_h3k27ac.q.05_peak_71815	wt_h3k27ac.q.05_peak_71815	-2.02068	1.96573	18.9764	1.32344e-05	0.00369433
wt_h3k27ac.q.05_peak_22556	wt_h3k27ac.q.05_peak_22556	0.441533	5.92874	18.9747	1.32463e-05	0.00369433
wt_h3k27ac.q.05_peak_49412	wt_h3k27ac.q.05_peak_49412	0.688056	4.55495	18.9686	1.32885e-05	0.00369433
wt_h3k27ac.q.05_peak_53425	wt_h3k27ac.q.05_peak_53425	-1.5058	2.57492	18.9634	1.33249e-05	0.00369433
wt_h3k27ac.q.05_peak_73647	wt_h3k27ac.q.05_peak_73647	-1.42617	2.69778	18.9594	1.33528e-05	0.00369433
wt_h3k27ac.q.05_peak_60721	wt_h3k27ac.q.05_peak_60721	-1.15354	3.20202	18.9309	1.35541e-05	0.00370546
wt_h3k27ac.q.05_peak_50123	wt_h3k27ac.q.05_peak_50123	0.714351	4.44955	18.9302	1.35589e-05	0.00370546
wt_h3k27ac.q.05_peak_65753	wt_h3k27ac.q.05_peak_65753	-0.908342	3.81095	18.9287	1.35692e-05	0.00370546
wt_h3k27ac.q.05_peak_25705	wt_h3k27ac.q.05_peak_25705	-1.63685	2.38686	18.8904	1.38444e-05	0.00375511
wt_h3k27ac.q.05_peak_75816	wt_h3k27ac.q.05_peak_75816	0.386594	6.55917	18.8861	1.38761e-05	0.00375511
wt_h3k27ac.q.05_peak_71237	wt_h3k27ac.q.05_peak_71237	0.850301	4.61072	18.8715	1.39825e-05	0.00375511
wt_h3k27ac.q.05_peak_33271	wt_h3k27ac.q.05_peak_33271	0.249002	7.51755	18.8686	1.40041e-05	0.00375511
wt_h3k27ac.q.05_peak_64571	wt_h3k27ac.q.05_peak_64571	0.367274	6.31934	18.8625	1.40487e-05	0.00375511
wt_h3k27ac.q.05_peak_46839	wt_h3k27ac.q.05_peak_46839	0.487522	5.50534	18.8258	1.43217e-05	0.00381194
wt_h3k27ac.q.05_peak_54774	wt_h3k27ac.q.05_peak_54774	-1.37445	2.76957	18.7626	1.48039e-05	0.00392372
wt_h3k27ac.q.05_peak_8872	wt_h3k27ac.q.05_peak_8872	0.498515	5.43425	18.721	1.5131e-05	0.00399362
wt_h3k27ac.q.05_peak_36027	wt_h3k27ac.q.05_peak_36027	-1.8297	2.17056	18.6916	1.53658e-05	0.00403871
wt_h3k27ac.q.05_peak_78951	wt_h3k27ac.q.05_peak_78951	-0.499954	5.42283	18.6446	1.57489e-05	0.00410674
wt_h3k27ac.q.05_peak_63887	wt_h3k27ac.q.05_peak_63887	0.442056	5.7698	18.6439	1.57548e-05	0.00410674
wt_h3k27ac.q.05_peak_23457	wt_h3k27ac.q.05_peak_23457	0.799725	4.12214	18.6327	1.58476e-05	0.00411392
wt_h3k27ac.q.05_peak_24241	wt_h3k27ac.q.05_peak_24241	-1.13358	3.22261	18.6139	1.6005e-05	0.00413518
wt_h3k27ac.q.05_peak_52977	wt_h3k27ac.q.05_peak_52977	-1.91766	2.57494	18.607	1.60631e-05	0.00413518
wt_h3k27ac.q.05_peak_4006	wt_h3k27ac.q.05_peak_4006	0.810683	4.08323	18.5995	1.61262e-05	0.00413518
wt_h3k27ac.q.05_peak_70930	wt_h3k27ac.q.05_peak_70930	-0.936466	3.70508	18.5695	1.63818e-05	0.00418371
wt_h3k27ac.q.05_peak_51513	wt_h3k27ac.q.05_peak_51513	-1.10775	3.47533	18.4958	1.70278e-05	0.00430488
wt_h3k27ac.q.05_peak_29353	wt_h3k27ac.q.05_peak_29353	-1.55246	2.47539	18.4954	1.70312e-05	0.00430488
wt_h3k27ac.q.05_peak_15246	wt_h3k27ac.q.05_peak_15246	-1.2881	2.90322	18.4921	1.70609e-05	0.00430488
wt_h3k27ac.q.05_peak_20443	wt_h3k27ac.q.05_peak_20443	0.345076	6.63703	18.467	1.72869e-05	0.00434452
wt_h3k27ac.q.05_peak_527	wt_h3k27ac.q.05_peak_527	0.31588	6.72534	18.4494	1.74477e-05	0.00436753
wt_h3k27ac.q.05_peak_24160	wt_h3k27ac.q.05_peak_24160	-0.856723	3.92854	18.4358	1.75728e-05	0.00438147
wt_h3k27ac.q.05_peak_33067	wt_h3k27ac.q.05_peak_33067	-1.25167	2.9657	18.406	1.78493e-05	0.00441635
wt_h3k27ac.q.05_peak_72839	wt_h3k27ac.q.05_peak_72839	0.289234	6.98047	18.4057	1.78527e-05	0.00441635
wt_h3k27ac.q.05_peak_30366	wt_h3k27ac.q.05_peak_30366	-0.994828	3.62993	18.393	1.79721e-05	0.00442341
wt_h3k27ac.q.05_peak_69765	wt_h3k27ac.q.05_peak_69765	-1.74968	2.21236	18.3803	1.80916e-05	0.00442341
wt_h3k27ac.q.05_peak_75515	wt_h3k27ac.q.05_peak_75515	-1.74968	2.21236	18.3803	1.80917e-05	0.00442341
wt_h3k27ac.q.05_peak_51553	wt_h3k27ac.q.05_peak_51553	-2.39319	2.08307	18.3653	1.82353e-05	0.00443551
wt_h3k27ac.q.05_peak_56347	wt_h3k27ac.q.05_peak_56347	0.692201	4.49265	18.3604	1.82818e-05	0.00443551
wt_h3k27ac.q.05_peak_6124	wt_h3k27ac.q.05_peak_6124	-1.21881	3.02556	18.3462	1.84185e-05	0.00444921
wt_h3k27ac.q.05_peak_75406	wt_h3k27ac.q.05_peak_75406	-0.4497	5.69953	18.3399	1.84793e-05	0.00444921
wt_h3k27ac.q.05_peak_254	wt_h3k27ac.q.05_peak_254	0.982135	3.55894	18.3281	1.85949e-05	0.00446002
wt_h3k27ac.q.05_peak_12472	wt_h3k27ac.q.05_peak_12472	-1.11434	3.24292	18.3074	1.87971e-05	0.00446298
wt_h3k27ac.q.05_peak_80139	wt_h3k27ac.q.05_peak_80139	-1.16192	3.13834	18.2921	1.8949e-05	0.00446298
wt_h3k27ac.q.05_peak_75921	wt_h3k27ac.q.05_peak_75921	-1.16192	3.13834	18.2921	1.89491e-05	0.00446298
wt_h3k27ac.q.05_peak_32984	wt_h3k27ac.q.05_peak_32984	-1.57914	2.42291	18.2747	1.91231e-05	0.00446298
wt_h3k27ac.q.05_peak_56934	wt_h3k27ac.q.05_peak_56934	0.542642	5.16007	18.2659	1.92116e-05	0.00446298
wt_h3k27ac.q.05_peak_26794	wt_h3k27ac.q.05_peak_26794	-0.848362	3.941	18.2571	1.93001e-05	0.00446298
wt_h3k27ac.q.05_peak_10472	wt_h3k27ac.q.05_peak_10472	0.872205	3.92242	18.252	1.93526e-05	0.00446298
wt_h3k27ac.q.05_peak_1896	wt_h3k27ac.q.05_peak_1896	-1.79677	2.14918	18.2488	1.93853e-05	0.00446298
wt_h3k27ac.q.05_peak_10618	wt_h3k27ac.q.05_peak_10618	-1.79677	2.14917	18.2487	1.93855e-05	0.00446298
wt_h3k27ac.q.05_peak_12710	wt_h3k27ac.q.05_peak_12710	-1.79677	2.14917	18.2487	1.93855e-05	0.00446298
wt_h3k27ac.q.05_peak_76959	wt_h3k27ac.q.05_peak_76959	-1.79677	2.14917	18.2487	1.93855e-05	0.00446298
wt_h3k27ac.q.05_peak_76409	wt_h3k27ac.q.05_peak_76409	-0.41746	6.42044	18.1977	1.99124e-05	0.00456761
wt_h3k27ac.q.05_peak_18279	wt_h3k27ac.q.05_peak_18279	-0.712259	4.40494	18.184	2.00556e-05	0.00458379
wt_h3k27ac.q.05_peak_35888	wt_h3k27ac.q.05_peak_35888	0.449528	5.68508	18.1724	2.01782e-05	0.00459516
wt_h3k27ac.q.05_peak_23435	wt_h3k27ac.q.05_peak_23435	-1.95729	2.34988	18.1568	2.03444e-05	0.0045993
wt_h3k27ac.q.05_peak_75327	wt_h3k27ac.q.05_peak_75327	0.528023	5.22792	18.1528	2.03865e-05	0.0045993
wt_h3k27ac.q.05_peak_18214	wt_h3k27ac.q.05_peak_18214	-2.10626	1.89044	18.1445	2.04761e-05	0.0045993
wt_h3k27ac.q.05_peak_47080	wt_h3k27ac.q.05_peak_47080	-1.85025	2.08309	18.1427	2.04957e-05	0.0045993
wt_h3k27ac.q.05_peak_42691	wt_h3k27ac.q.05_peak_42691	0.656997	4.61854	18.1366	2.05609e-05	0.0045993
wt_h3k27ac.q.05_peak_76872	wt_h3k27ac.q.05_peak_76872	0.550052	5.11115	18.127	2.06647e-05	0.00460619
wt_h3k27ac.q.05_peak_47364	wt_h3k27ac.q.05_peak_47364	-2.16554	1.78353	18.1109	2.08406e-05	0.00462903
wt_h3k27ac.q.05_peak_51449	wt_h3k27ac.q.05_peak_51449	0.573848	4.99017	18.0938	2.10281e-05	0.0046543
wt_h3k27ac.q.05_peak_74992	wt_h3k27ac.q.05_peak_74992	0.538964	5.63206	18.0787	2.11957e-05	0.00466078
wt_h3k27ac.q.05_peak_11370	wt_h3k27ac.q.05_peak_11370	-1.91155	2.01383	18.0675	2.13211e-05	0.00466078
wt_h3k27ac.q.05_peak_49086	wt_h3k27ac.q.05_peak_49086	-1.91155	2.01382	18.0675	2.13213e-05	0.00466078
wt_h3k27ac.q.05_peak_8628	wt_h3k27ac.q.05_peak_8628	-1.60849	2.36848	18.0646	2.13529e-05	0.00466078
wt_h3k27ac.q.05_peak_28597	wt_h3k27ac.q.05_peak_28597	0.866239	3.86457	18.0371	2.16637e-05	0.00471231
wt_h3k27ac.q.05_peak_13030	wt_h3k27ac.q.05_peak_13030	-2.52327	2.85118	17.94	2.27982e-05	0.00489362
wt_h3k27ac.q.05_peak_72825	wt_h3k27ac.q.05_peak_72825	-1.4193	2.63767	17.9399	2.27989e-05	0.00489362
wt_h3k27ac.q.05_peak_12365	wt_h3k27ac.q.05_peak_12365	-1.4193	2.63767	17.9399	2.27991e-05	0.00489362
wt_h3k27ac.q.05_peak_48736	wt_h3k27ac.q.05_peak_48736	0.617706	4.77323	17.9392	2.28076e-05	0.00489362
wt_h3k27ac.q.05_peak_78898	wt_h3k27ac.q.05_peak_78898	0.562218	5.03452	17.932	2.28934e-05	0.00489538
wt_h3k27ac.q.05_peak_64942	wt_h3k27ac.q.05_peak_64942	0.76824	4.176	17.9229	2.30041e-05	0.00490244
wt_h3k27ac.q.05_peak_68878	wt_h3k27ac.q.05_peak_68878	1.10771	3.22275	17.9111	2.31466e-05	0.0049162
wt_h3k27ac.q.05_peak_72227	wt_h3k27ac.q.05_peak_72227	-0.886209	3.79728	17.881	2.35161e-05	0.00497792
wt_h3k27ac.q.05_peak_42579	wt_h3k27ac.q.05_peak_42579	-1.42618	2.69778	17.8598	2.37791e-05	0.00501675
wt_h3k27ac.q.05_peak_73635	wt_h3k27ac.q.05_peak_73635	-0.924555	3.93473	17.8337	2.41078e-05	0.00505659
wt_h3k27ac.q.05_peak_13315	wt_h3k27ac.q.05_peak_13315	0.654098	4.60682	17.8321	2.41282e-05	0.00505659
wt_h3k27ac.q.05_peak_69394	wt_h3k27ac.q.05_peak_69394	-1.41931	2.63768	17.793	2.4629e-05	0.00514444
wt_h3k27ac.q.05_peak_71732	wt_h3k27ac.q.05_peak_71732	-1.82051	2.5093	17.7673	2.49631e-05	0.00519701
wt_h3k27ac.q.05_peak_33807	wt_h3k27ac.q.05_peak_33807	-1.36573	2.71242	17.7495	2.51978e-05	0.00522862
wt_h3k27ac.q.05_peak_50350	wt_h3k27ac.q.05_peak_50350	-0.995739	3.48394	17.7324	2.54257e-05	0.00524572
wt_h3k27ac.q.05_peak_51663	wt_h3k27ac.q.05_peak_51663	0.310787	6.71455	17.7309	2.54465e-05	0.00524572
wt_h3k27ac.q.05_peak_61131	wt_h3k27ac.q.05_peak_61131	-1.52568	2.45811	17.6992	2.5873e-05	0.00530424
wt_h3k27ac.q.05_peak_58152	wt_h3k27ac.q.05_peak_58152	0.574134	5.27307	17.6937	2.5949e-05	0.00530424
wt_h3k27ac.q.05_peak_63663	wt_h3k27ac.q.05_peak_63663	-0.712719	4.92224	17.6912	2.59826e-05	0.00530424
wt_h3k27ac.q.05_peak_25864	wt_h3k27ac.q.05_peak_25864	-1.67709	2.25301	17.6833	2.60905e-05	0.00530908
wt_h3k27ac.q.05_peak_42386	wt_h3k27ac.q.05_peak_42386	-1.43666	2.59084	17.6743	2.62142e-05	0.0053171
wt_h3k27ac.q.05_peak_57386	wt_h3k27ac.q.05_peak_57386	-2.10613	1.89043	17.6259	2.68906e-05	0.00543681
wt_h3k27ac.q.05_peak_21275	wt_h3k27ac.q.05_peak_21275	-0.969125	3.54245	17.5903	2.73977e-05	0.00552163
wt_h3k27ac.q.05_peak_13145	wt_h3k27ac.q.05_peak_13145	-0.623943	4.71961	17.5731	2.76477e-05	0.00555429
wt_h3k27ac.q.05_peak_18761	wt_h3k27ac.q.05_peak_18761	0.41175	6.403	17.5179	2.8462e-05	0.00569972
wt_h3k27ac.q.05_peak_30374	wt_h3k27ac.q.05_peak_30374	-0.944828	3.59874	17.4718	2.91608e-05	0.00582119
wt_h3k27ac.q.05_peak_62826	wt_h3k27ac.q.05_peak_62826	0.41676	5.84317	17.4567	2.93924e-05	0.0058489
wt_h3k27ac.q.05_peak_62979	wt_h3k27ac.q.05_peak_62979	-1.22544	2.98996	17.4414	2.96299e-05	0.00586986
wt_h3k27ac.q.05_peak_5659	wt_h3k27ac.q.05_peak_5659	-0.836165	3.91592	17.438	2.96838e-05	0.00586986
wt_h3k27ac.q.05_peak_17028	wt_h3k27ac.q.05_peak_17028	-0.995907	3.45811	17.4032	3.02311e-05	0.00595941
wt_h3k27ac.q.05_peak_57560	wt_h3k27ac.q.05_peak_57560	0.391917	6.014	17.3915	3.04176e-05	0.00597748
wt_h3k27ac.q.05_peak_63859	wt_h3k27ac.q.05_peak_63859	-1.91867	2.12749	17.379	3.06185e-05	0.00599465
wt_h3k27ac.q.05_peak_26234	wt_h3k27ac.q.05_peak_26234	-0.922547	3.65289	17.3735	3.07071e-05	0.00599465
wt_h3k27ac.q.05_peak_66788	wt_h3k27ac.q.05_peak_66788	-1.2064	2.97787	17.3663	3.08248e-05	0.00599465
wt_h3k27ac.q.05_peak_21513	wt_h3k27ac.q.05_peak_21513	-1.79678	2.14917	17.3626	3.08851e-05	0.00599465
wt_h3k27ac.q.05_peak_72026	wt_h3k27ac.q.05_peak_72026	0.508962	5.26569	17.3367	3.13078e-05	0.00605805
wt_h3k27ac.q.05_peak_69055	wt_h3k27ac.q.05_peak_69055	0.372463	6.15476	17.322	3.15517e-05	0.00608658
wt_h3k27ac.q.05_peak_79880	wt_h3k27ac.q.05_peak_79880	-1.33031	2.74129	17.3122	3.17138e-05	0.00609921
wt_h3k27ac.q.05_peak_19773	wt_h3k27ac.q.05_peak_19773	1.02213	3.37781	17.2906	3.20763e-05	0.0061399
wt_h3k27ac.q.05_peak_38333	wt_h3k27ac.q.05_peak_38333	1.09129	3.21247	17.286	3.21553e-05	0.0061399
wt_h3k27ac.q.05_peak_36208	wt_h3k27ac.q.05_peak_36208	-1.52801	2.526	17.2801	3.22543e-05	0.0061399
wt_h3k27ac.q.05_peak_49934	wt_h3k27ac.q.05_peak_49934	0.92346	3.63782	17.2766	3.23147e-05	0.0061399
wt_h3k27ac.q.05_peak_7420	wt_h3k27ac.q.05_peak_7420	0.762642	4.1439	17.269	3.24435e-05	0.00614585
wt_h3k27ac.q.05_peak_42495	wt_h3k27ac.q.05_peak_42495	-1.84203	2.2729	17.2494	3.278e-05	0.00618103
wt_h3k27ac.q.05_peak_56933	wt_h3k27ac.q.05_peak_56933	-1.81495	2.06035	17.2468	3.28252e-05	0.00618103
wt_h3k27ac.q.05_peak_59120	wt_h3k27ac.q.05_peak_59120	0.379151	6.09591	17.2321	3.30799e-05	0.00621046
wt_h3k27ac.q.05_peak_23761	wt_h3k27ac.q.05_peak_23761	0.403666	5.93665	17.2133	3.34097e-05	0.00625376
wt_h3k27ac.q.05_peak_77428	wt_h3k27ac.q.05_peak_77428	0.39381	5.98418	17.2004	3.36362e-05	0.00627752
wt_h3k27ac.q.05_peak_28981	wt_h3k27ac.q.05_peak_28981	-1.3952	2.62224	17.193	3.37681e-05	0.00628356
wt_h3k27ac.q.05_peak_66531	wt_h3k27ac.q.05_peak_66531	0.214333	7.77029	17.1773	3.40477e-05	0.00631696
wt_h3k27ac.q.05_peak_66091	wt_h3k27ac.q.05_peak_66091	-1.60333	2.57494	17.1571	3.44113e-05	0.00636569
wt_h3k27ac.q.05_peak_34174	wt_h3k27ac.q.05_peak_34174	-2.96799	1.96574	17.1327	3.48577e-05	0.00642941
wt_h3k27ac.q.05_peak_18377	wt_h3k27ac.q.05_peak_18377	-1.52824	2.52603	17.1219	3.50553e-05	0.00643937
wt_h3k27ac.q.05_peak_53784	wt_h3k27ac.q.05_peak_53784	-1.06211	3.27291	17.1186	3.51159e-05	0.00643937
wt_h3k27ac.q.05_peak_35490	wt_h3k27ac.q.05_peak_35490	1.37476	3.14931	17.1113	3.5252e-05	0.00644559
wt_h3k27ac.q.05_peak_40283	wt_h3k27ac.q.05_peak_40283	0.312987	6.64079	17.1012	3.54397e-05	0.00644667
wt_h3k27ac.q.05_peak_42811	wt_h3k27ac.q.05_peak_42811	-1.94347	1.91597	17.0945	3.55642e-05	0.00644667
wt_h3k27ac.q.05_peak_63359	wt_h3k27ac.q.05_peak_63359	-1.94347	1.91596	17.0945	3.55644e-05	0.00644667
wt_h3k27ac.q.05_peak_74855	wt_h3k27ac.q.05_peak_74855	-1.08205	3.22258	17.0713	3.60016e-05	0.00648116
wt_h3k27ac.q.05_peak_5478	wt_h3k27ac.q.05_peak_5478	0.462202	5.51579	17.0683	3.60594e-05	0.00648116
wt_h3k27ac.q.05_peak_72554	wt_h3k27ac.q.05_peak_72554	-1.42593	2.69775	17.0623	3.61729e-05	0.00648116
wt_h3k27ac.q.05_peak_22232	wt_h3k27ac.q.05_peak_22232	-1.21287	2.94104	17.0537	3.63382e-05	0.00648116
wt_h3k27ac.q.05_peak_12098	wt_h3k27ac.q.05_peak_12098	1.00735	3.39607	17.0517	3.63767e-05	0.00648116
wt_h3k27ac.q.05_peak_39714	wt_h3k27ac.q.05_peak_39714	-1.70797	2.27291	17.0469	3.64673e-05	0.00648116
wt_h3k27ac.q.05_peak_64256	wt_h3k27ac.q.05_peak_64256	-1.61083	2.29252	17.0394	3.66129e-05	0.00648116
wt_h3k27ac.q.05_peak_20414	wt_h3k27ac.q.05_peak_20414	-1.10371	3.17053	17.0364	3.66699e-05	0.00648116
wt_h3k27ac.q.05_peak_18653	wt_h3k27ac.q.05_peak_18653	1.04556	3.62235	17.0292	3.68085e-05	0.00648116
wt_h3k27ac.q.05_peak_66	wt_h3k27ac.q.05_peak_66	0.585448	4.84815	17.027	3.68521e-05	0.00648116
wt_h3k27ac.q.05_peak_14923	wt_h3k27ac.q.05_peak_14923	-1.34279	2.69778	17.0234	3.6922e-05	0.00648116
wt_h3k27ac.q.05_peak_1555	wt_h3k27ac.q.05_peak_1555	0.844605	3.85139	17.02	3.69877e-05	0.00648116
wt_h3k27ac.q.05_peak_10454	wt_h3k27ac.q.05_peak_10454	0.398953	5.9304	17.0045	3.72913e-05	0.00651627
wt_h3k27ac.q.05_peak_50832	wt_h3k27ac.q.05_peak_50832	0.236761	7.45296	16.9682	3.80116e-05	0.00662379
wt_h3k27ac.q.05_peak_6795	wt_h3k27ac.q.05_peak_6795	-0.865345	3.91596	16.959	3.81964e-05	0.00663766
wt_h3k27ac.q.05_peak_12306	wt_h3k27ac.q.05_peak_12306	0.32699	6.50017	16.9483	3.84111e-05	0.00665663
wt_h3k27ac.q.05_peak_62331	wt_h3k27ac.q.05_peak_62331	0.378476	6.07621	16.94	3.85801e-05	0.00666759
wt_h3k27ac.q.05_peak_26148	wt_h3k27ac.q.05_peak_26148	-0.881477	3.73407	16.9033	3.93326e-05	0.00677907
wt_h3k27ac.q.05_peak_66351	wt_h3k27ac.q.05_peak_66351	-1.37464	2.76959	16.896	3.94841e-05	0.00678663
wt_h3k27ac.q.05_peak_35628	wt_h3k27ac.q.05_peak_35628	-1.76316	2.12749	16.8834	3.97474e-05	0.00681333
wt_h3k27ac.q.05_peak_69659	wt_h3k27ac.q.05_peak_69659	0.461204	5.50531	16.8721	3.99858e-05	0.00683561
wt_h3k27ac.q.05_peak_72111	wt_h3k27ac.q.05_peak_72111	-0.98188	3.44936	16.8351	4.07724e-05	0.00695126
wt_h3k27ac.q.05_peak_60704	wt_h3k27ac.q.05_peak_60704	0.67733	4.42754	16.8033	4.14612e-05	0.00704963
wt_h3k27ac.q.05_peak_36916	wt_h3k27ac.q.05_peak_36916	-1.01974	3.62218	16.7783	4.20101e-05	0.00712377
wt_h3k27ac.q.05_peak_73929	wt_h3k27ac.q.05_peak_73929	-1.08433	3.19159	16.7454	4.27459e-05	0.00720289
wt_h3k27ac.q.05_peak_67063	wt_h3k27ac.q.05_peak_67063	-1.08432	3.19157	16.7453	4.27473e-05	0.00720289
wt_h3k27ac.q.05_peak_42341	wt_h3k27ac.q.05_peak_42341	-1.21974	2.90327	16.7421	4.28193e-05	0.00720289
wt_h3k27ac.q.05_peak_56642	wt_h3k27ac.q.05_peak_56642	0.814691	3.92244	16.7193	4.33385e-05	0.00727085
wt_h3k27ac.q.05_peak_60808	wt_h3k27ac.q.05_peak_60808	1.03204	3.68313	16.7	4.37799e-05	0.00732542
wt_h3k27ac.q.05_peak_50453	wt_h3k27ac.q.05_peak_50453	-0.782479	4.56273	16.6934	4.39334e-05	0.00733165
wt_h3k27ac.q.05_peak_7857	wt_h3k27ac.q.05_peak_7857	-1.52297	2.38687	16.6731	4.44073e-05	0.00739118
wt_h3k27ac.q.05_peak_8346	wt_h3k27ac.q.05_peak_8346	0.712411	4.27801	16.6598	4.47185e-05	0.00742339
wt_h3k27ac.q.05_peak_59920	wt_h3k27ac.q.05_peak_59920	-1.42968	2.52603	16.6535	4.48676e-05	0.0074286
wt_h3k27ac.q.05_peak_60506	wt_h3k27ac.q.05_peak_60506	-0.773045	4.06032	16.6426	4.51252e-05	0.00745169
wt_h3k27ac.q.05_peak_75318	wt_h3k27ac.q.05_peak_75318	-2.12843	2.03725	16.6361	4.5281e-05	0.00745788
wt_h3k27ac.q.05_peak_60768	wt_h3k27ac.q.05_peak_60768	-0.823541	3.89039	16.626	4.55232e-05	0.00747825
wt_h3k27ac.q.05_peak_59413	wt_h3k27ac.q.05_peak_59413	0.445221	5.58312	16.611	4.5883e-05	0.00751778
wt_h3k27ac.q.05_peak_64904	wt_h3k27ac.q.05_peak_64904	-1.94338	1.91596	16.5839	4.65434e-05	0.00760623
wt_h3k27ac.q.05_peak_205	wt_h3k27ac.q.05_peak_205	0.471288	5.41864	16.5765	4.67261e-05	0.00761169
wt_h3k27ac.q.05_peak_50806	wt_h3k27ac.q.05_peak_50806	0.521713	5.23046	16.5728	4.68181e-05	0.00761169
wt_h3k27ac.q.05_peak_9632	wt_h3k27ac.q.05_peak_9632	0.912883	3.94738	16.5638	4.70396e-05	0.00762803
wt_h3k27ac.q.05_peak_64541	wt_h3k27ac.q.05_peak_64541	0.375567	6.06485	16.5523	4.73253e-05	0.00765469
wt_h3k27ac.q.05_peak_46862	wt_h3k27ac.q.05_peak_46862	0.517397	5.15202	16.5378	4.76886e-05	0.00766746
wt_h3k27ac.q.05_peak_63873	wt_h3k27ac.q.05_peak_63873	0.490485	5.37559	16.5348	4.77642e-05	0.00766746
wt_h3k27ac.q.05_peak_32456	wt_h3k27ac.q.05_peak_32456	-1.94355	1.91599	16.5345	4.77725e-05	0.00766746
wt_h3k27ac.q.05_peak_9007	wt_h3k27ac.q.05_peak_9007	-1.91852	2.12748	16.5298	4.78905e-05	0.00766746
wt_h3k27ac.q.05_peak_21645	wt_h3k27ac.q.05_peak_21645	0.612663	4.67943	16.5203	4.81317e-05	0.00766751
wt_h3k27ac.q.05_peak_64363	wt_h3k27ac.q.05_peak_64363	0.612662	4.67945	16.5202	4.81339e-05	0.00766751
wt_h3k27ac.q.05_peak_10897	wt_h3k27ac.q.05_peak_10897	-1.72867	2.10546	16.5014	4.86151e-05	0.00768828
wt_h3k27ac.q.05_peak_25826	wt_h3k27ac.q.05_peak_25826	-1.72867	2.10545	16.5013	4.86156e-05	0.00768828
wt_h3k27ac.q.05_peak_22824	wt_h3k27ac.q.05_peak_22824	-1.26499	2.79731	16.5	4.86492e-05	0.00768828
wt_h3k27ac.q.05_peak_41857	wt_h3k27ac.q.05_peak_41857	1.03901	3.27303	16.496	4.87532e-05	0.00768828
wt_h3k27ac.q.05_peak_69812	wt_h3k27ac.q.05_peak_69812	1.03408	3.54268	16.4913	4.88737e-05	0.00768828
wt_h3k27ac.q.05_peak_78476	wt_h3k27ac.q.05_peak_78476	0.328668	6.44306	16.4668	4.95104e-05	0.0077564
wt_h3k27ac.q.05_peak_63430	wt_h3k27ac.q.05_peak_63430	-0.789222	3.98992	16.463	4.96077e-05	0.0077564
wt_h3k27ac.q.05_peak_37599	wt_h3k27ac.q.05_peak_37599	1.16886	2.97801	16.4605	4.96756e-05	0.0077564
wt_h3k27ac.q.05_peak_35788	wt_h3k27ac.q.05_peak_35788	-1.55005	2.33102	16.4425	5.0149e-05	0.00777281
wt_h3k27ac.q.05_peak_39668	wt_h3k27ac.q.05_peak_39668	-1.55005	2.33102	16.4425	5.01491e-05	0.00777281
wt_h3k27ac.q.05_peak_52163	wt_h3k27ac.q.05_peak_52163	-1.55005	2.33101	16.4424	5.01503e-05	0.00777281
wt_h3k27ac.q.05_peak_73904	wt_h3k27ac.q.05_peak_73904	0.593694	4.75923	16.4353	5.03398e-05	0.00778305
wt_h3k27ac.q.05_peak_71327	wt_h3k27ac.q.05_peak_71327	0.491696	5.28534	16.4213	5.07109e-05	0.00781004
wt_h3k27ac.q.05_peak_30049	wt_h3k27ac.q.05_peak_30049	-1.08671	3.15988	16.4194	5.0762e-05	0.00781004
wt_h3k27ac.q.05_peak_77584	wt_h3k27ac.q.05_peak_77584	0.965594	3.44954	16.3743	5.19859e-05	0.00797608
wt_h3k27ac.q.05_peak_6806	wt_h3k27ac.q.05_peak_6806	-1.16251	2.98995	16.3703	5.2094e-05	0.00797608
wt_h3k27ac.q.05_peak_59607	wt_h3k27ac.q.05_peak_59607	1.22588	3.01393	16.3641	5.2265e-05	0.00798288
wt_h3k27ac.q.05_peak_80679	wt_h3k27ac.q.05_peak_80679	-0.693584	4.3451	16.3348	5.30808e-05	0.0080879
wt_h3k27ac.q.05_peak_67212	wt_h3k27ac.q.05_peak_67212	-1.83635	1.96573	16.2492	5.55341e-05	0.00840039
wt_h3k27ac.q.05_peak_52820	wt_h3k27ac.q.05_peak_52820	-1.83635	1.96573	16.2492	5.55342e-05	0.00840039
wt_h3k27ac.q.05_peak_29282	wt_h3k27ac.q.05_peak_29282	-1.83635	1.96572	16.2492	5.55343e-05	0.00840039
wt_h3k27ac.q.05_peak_49743	wt_h3k27ac.q.05_peak_49743	0.738569	4.14391	16.2294	5.61153e-05	0.00840039
wt_h3k27ac.q.05_peak_67352	wt_h3k27ac.q.05_peak_67352	0.704114	4.27308	16.2276	5.61704e-05	0.00840039
wt_h3k27ac.q.05_peak_56985	wt_h3k27ac.q.05_peak_56985	0.411079	5.77678	16.2251	5.62432e-05	0.00840039
wt_h3k27ac.q.05_peak_58285	wt_h3k27ac.q.05_peak_58285	-1.58006	2.2729	16.2222	5.63296e-05	0.00840039
wt_h3k27ac.q.05_peak_34528	wt_h3k27ac.q.05_peak_34528	-1.58005	2.27289	16.2222	5.633e-05	0.00840039
wt_h3k27ac.q.05_peak_14373	wt_h3k27ac.q.05_peak_14373	-1.58005	2.27289	16.2222	5.63302e-05	0.00840039
wt_h3k27ac.q.05_peak_58898	wt_h3k27ac.q.05_peak_58898	-0.753008	4.09423	16.2113	5.66556e-05	0.00842899
wt_h3k27ac.q.05_peak_3255	wt_h3k27ac.q.05_peak_3255	0.530002	5.9193	16.191	5.72651e-05	0.00849963
wt_h3k27ac.q.05_peak_9889	wt_h3k27ac.q.05_peak_9889	-1.38637	2.55882	16.1767	5.76988e-05	0.00853577
wt_h3k27ac.q.05_peak_17446	wt_h3k27ac.q.05_peak_17446	-1.90325	1.89045	16.17	5.79041e-05	0.00853577
wt_h3k27ac.q.05_peak_74256	wt_h3k27ac.q.05_peak_74256	0.862045	3.72706	16.1697	5.79146e-05	0.00853577
wt_h3k27ac.q.05_peak_30007	wt_h3k27ac.q.05_peak_30007	-0.941673	3.50093	16.1569	5.83057e-05	0.00856941
wt_h3k27ac.q.05_peak_11626	wt_h3k27ac.q.05_peak_11626	-1.50568	2.57491	16.1468	5.86164e-05	0.00856941
wt_h3k27ac.q.05_peak_37004	wt_h3k27ac.q.05_peak_37004	0.388028	5.93499	16.1463	5.86317e-05	0.00856941
wt_h3k27ac.q.05_peak_65658	wt_h3k27ac.q.05_peak_65658	0.711322	4.23804	16.1421	5.87625e-05	0.00856941
wt_h3k27ac.q.05_peak_22396	wt_h3k27ac.q.05_peak_22396	-1.06753	3.1811	16.137	5.89205e-05	0.00856941
wt_h3k27ac.q.05_peak_6342	wt_h3k27ac.q.05_peak_6342	-1.47059	2.42294	16.1358	5.89579e-05	0.00856941
wt_h3k27ac.q.05_peak_71270	wt_h3k27ac.q.05_peak_71270	-1.2348	2.82454	16.1222	5.93826e-05	0.00861129
wt_h3k27ac.q.05_peak_72545	wt_h3k27ac.q.05_peak_72545	-0.886884	3.65288	16.1172	5.95407e-05	0.00861441
wt_h3k27ac.q.05_peak_34089	wt_h3k27ac.q.05_peak_34089	-0.647922	4.49244	16.0989	6.01195e-05	0.00867826
wt_h3k27ac.q.05_peak_23934	wt_h3k27ac.q.05_peak_23934	-1.08922	3.12746	16.0937	6.02851e-05	0.00868229
wt_h3k27ac.q.05_peak_31072	wt_h3k27ac.q.05_peak_31072	-0.867866	3.70509	16.0649	6.12091e-05	0.00878116
wt_h3k27ac.q.05_peak_8888	wt_h3k27ac.q.05_peak_8888	-1.11292	3.07173	16.0636	6.125e-05	0.00878116
wt_h3k27ac.q.05_peak_57902	wt_h3k27ac.q.05_peak_57902	-0.954067	3.45808	16.0477	6.17663e-05	0.00882112
wt_h3k27ac.q.05_peak_14738	wt_h3k27ac.q.05_peak_14738	-1.7562	2.38688	16.0464	6.18084e-05	0.00882112
wt_h3k27ac.q.05_peak_5716	wt_h3k27ac.q.05_peak_5716	0.822641	3.83809	16.0245	6.25271e-05	0.00890355
wt_h3k27ac.q.05_peak_38989	wt_h3k27ac.q.05_peak_38989	-1.61349	2.21236	16.0142	6.28688e-05	0.00893204
wt_h3k27ac.q.05_peak_52177	wt_h3k27ac.q.05_peak_52177	-1.61349	2.21237	15.994	6.35435e-05	0.00899198
wt_h3k27ac.q.05_peak_68978	wt_h3k27ac.q.05_peak_68978	-1.54999	2.33099	15.993	6.35758e-05	0.00899198
wt_h3k27ac.q.05_peak_16875	wt_h3k27ac.q.05_peak_16875	-0.669605	4.3914	15.9727	6.42627e-05	0.00906881
wt_h3k27ac.q.05_peak_25987	wt_h3k27ac.q.05_peak_25987	-1.76317	2.12748	15.966	6.4491e-05	0.00908071
wt_h3k27ac.q.05_peak_9392	wt_h3k27ac.q.05_peak_9392	-1.50605	2.57494	15.9508	6.50097e-05	0.00913336
wt_h3k27ac.q.05_peak_6484	wt_h3k27ac.q.05_peak_6484	0.182731	8.14132	15.9345	6.55713e-05	0.00919052
wt_h3k27ac.q.05_peak_66180	wt_h3k27ac.q.05_peak_66180	-1.03018	3.253	15.929	6.57616e-05	0.00919052
wt_h3k27ac.q.05_peak_43511	wt_h3k27ac.q.05_peak_43511	0.426384	5.64554	15.9251	6.58981e-05	0.00919052
wt_h3k27ac.q.05_peak_20201	wt_h3k27ac.q.05_peak_20201	-1.76323	2.12748	15.9222	6.59994e-05	0.00919052
wt_h3k27ac.q.05_peak_10063	wt_h3k27ac.q.05_peak_10063	-2.18415	1.94108	15.9128	6.63276e-05	0.00921589
wt_h3k27ac.q.05_peak_31535	wt_h3k27ac.q.05_peak_31535	0.520369	5.08047	15.9061	6.65637e-05	0.00922628
wt_h3k27ac.q.05_peak_44358	wt_h3k27ac.q.05_peak_44358	-1.40339	2.50933	15.9024	6.6695e-05	0.00922628
wt_h3k27ac.q.05_peak_2012	wt_h3k27ac.q.05_peak_2012	-1.28478	2.71243	15.8968	6.68916e-05	0.00923323
wt_h3k27ac.q.05_peak_40300	wt_h3k27ac.q.05_peak_40300	-1.49404	2.36849	15.8872	6.72323e-05	0.00926
wt_h3k27ac.q.05_peak_23996	wt_h3k27ac.q.05_peak_23996	-1.8504	2.08309	15.8699	6.78501e-05	0.00932474
wt_h3k27ac.q.05_peak_49001	wt_h3k27ac.q.05_peak_49001	-0.840904	3.76957	15.8507	6.85427e-05	0.00939256
wt_h3k27ac.q.05_peak_76334	wt_h3k27ac.q.05_peak_76334	0.770803	3.99613	15.8479	6.86414e-05	0.00939256
wt_h3k27ac.q.05_peak_53200	wt_h3k27ac.q.05_peak_53200	0.859647	3.70526	15.8297	6.93043e-05	0.00946273
wt_h3k27ac.q.05_peak_47042	wt_h3k27ac.q.05_peak_47042	-1.651	2.14918	15.8205	6.96423e-05	0.00946799
wt_h3k27ac.q.05_peak_21992	wt_h3k27ac.q.05_peak_21992	-1.651	2.14917	15.8205	6.96429e-05	0.00946799
wt_h3k27ac.q.05_peak_43810	wt_h3k27ac.q.05_peak_43810	-1.24309	2.78353	15.8143	6.98724e-05	0.00947875
wt_h3k27ac.q.05_peak_57887	wt_h3k27ac.q.05_peak_57887	-1.67702	2.25299	15.8093	7.00574e-05	0.00948346
wt_h3k27ac.q.05_peak_28369	wt_h3k27ac.q.05_peak_28369	-1.26507	2.79734	15.7891	7.08105e-05	0.00956488
wt_h3k27ac.q.05_peak_4712	wt_h3k27ac.q.05_peak_4712	1.21042	2.83806	15.7795	7.11706e-05	0.00959298
wt_h3k27ac.q.05_peak_1585	wt_h3k27ac.q.05_peak_1585	-1.55001	2.331	15.774	7.13778e-05	0.00960039
wt_h3k27ac.q.05_peak_8866	wt_h3k27ac.q.05_peak_8866	0.348109	6.21003	15.7321	7.29742e-05	0.00976312
wt_h3k27ac.q.05_peak_57866	wt_h3k27ac.q.05_peak_57866	-1.37464	2.76958	15.7283	7.31226e-05	0.00976312
wt_h3k27ac.q.05_peak_55934	wt_h3k27ac.q.05_peak_55934	-1.14324	2.97789	15.7277	7.31447e-05	0.00976312
wt_h3k27ac.q.05_peak_63081	wt_h3k27ac.q.05_peak_63081	-1.65099	2.14916	15.7261	7.32068e-05	0.00976312
wt_h3k27ac.q.05_peak_9942	wt_h3k27ac.q.05_peak_9942	0.738203	4.10003	15.7102	7.3824e-05	0.0098136
wt_h3k27ac.q.05_peak_55390	wt_h3k27ac.q.05_peak_55390	0.905459	3.55895	15.7057	7.40002e-05	0.0098136
wt_h3k27ac.q.05_peak_70359	wt_h3k27ac.q.05_peak_70359	-0.522318	5.05453	15.7044	7.4052e-05	0.0098136
wt_h3k27ac.q.05_peak_46700	wt_h3k27ac.q.05_peak_46700	0.352743	6.16808	15.6922	7.4532e-05	0.00983182
wt_h3k27ac.q.05_peak_49936	wt_h3k27ac.q.05_peak_49936	0.819866	3.81793	15.6891	7.46545e-05	0.00983182
wt_h3k27ac.q.05_peak_8990	wt_h3k27ac.q.05_peak_8990	0.819864	3.81794	15.689	7.46571e-05	0.00983182
wt_h3k27ac.q.05_peak_67560	wt_h3k27ac.q.05_peak_67560	-1.65102	2.14919	15.6773	7.5121e-05	0.00987231
wt_h3k27ac.q.05_peak_61725	wt_h3k27ac.q.05_peak_61725	-0.894645	3.59084	15.659	7.5852e-05	0.00989994
wt_h3k27ac.q.05_peak_68496	wt_h3k27ac.q.05_peak_68496	-1.67853	2.55876	15.6524	7.61145e-05	0.00989994
wt_h3k27ac.q.05_peak_46757	wt_h3k27ac.q.05_peak_46757	-1.69338	2.08308	15.6439	7.6457e-05	0.00989994
wt_h3k27ac.q.05_peak_71717	wt_h3k27ac.q.05_peak_71717	-1.69337	2.08309	15.6439	7.64574e-05	0.00989994
wt_h3k27ac.q.05_peak_60923	wt_h3k27ac.q.05_peak_60923	-1.69337	2.08308	15.6439	7.6458e-05	0.00989994
wt_h3k27ac.q.05_peak_48170	wt_h3k27ac.q.05_peak_48170	-1.69337	2.08307	15.6439	7.64586e-05	0.00989994
wt_h3k27ac.q.05_peak_63812	wt_h3k27ac.q.05_peak_63812	0.494011	5.20218	15.6371	7.67335e-05	0.00989994
wt_h3k27ac.q.05_peak_9057	wt_h3k27ac.q.05_peak_9057	-1.11631	3.03724	15.6362	7.67704e-05	0.00989994
wt_h3k27ac.q.05_peak_190	wt_h3k27ac.q.05_peak_190	-1.42194	2.45812	15.6331	7.68986e-05	0.00989994
wt_h3k27ac.q.05_peak_14639	wt_h3k27ac.q.05_peak_14639	-1.42194	2.4581	15.633	7.69006e-05	0.00989994
wt_h3k27ac.q.05_peak_63179	wt_h3k27ac.q.05_peak_63179	0.498551	5.1734	15.6034	7.81154e-05	0.0100351
wt_h3k27ac.q.05_peak_69764	wt_h3k27ac.q.05_peak_69764	-1.29577	2.66803	15.5982	7.83282e-05	0.0100351
wt_h3k27ac.q.05_peak_3375	wt_h3k27ac.q.05_peak_3375	0.456602	5.42091	15.5958	7.84277e-05	0.0100351
wt_h3k27ac.q.05_peak_29687	wt_h3k27ac.q.05_peak_29687	0.241205	7.26883	15.5677	7.96016e-05	0.0101647
wt_h3k27ac.q.05_peak_66238	wt_h3k27ac.q.05_peak_66238	0.469662	5.33593	15.5401	8.07749e-05	0.0102937
wt_h3k27ac.q.05_peak_73467	wt_h3k27ac.q.05_peak_73467	-0.90469	3.55068	15.5306	8.11802e-05	0.0103125
wt_h3k27ac.q.05_peak_3981	wt_h3k27ac.q.05_peak_3981	-1.68469	2.17055	15.529	8.12493e-05	0.0103125
wt_h3k27ac.q.05_peak_64864	wt_h3k27ac.q.05_peak_64864	0.706523	4.35003	15.5242	8.14579e-05	0.0103182
wt_h3k27ac.q.05_peak_62129	wt_h3k27ac.q.05_peak_62129	-1.81493	2.06036	15.516	8.18081e-05	0.0103256
wt_h3k27ac.q.05_peak_23220	wt_h3k27ac.q.05_peak_23220	0.82562	3.78366	15.5102	8.20627e-05	0.0103256
wt_h3k27ac.q.05_peak_40375	wt_h3k27ac.q.05_peak_40375	-1.25196	2.7413	15.5078	8.21664e-05	0.0103256
wt_h3k27ac.q.05_peak_75553	wt_h3k27ac.q.05_peak_75553	-1.25196	2.74126	15.5077	8.21713e-05	0.0103256
wt_h3k27ac.q.05_peak_15296	wt_h3k27ac.q.05_peak_15296	-0.807937	3.84459	15.5024	8.24005e-05	0.0103338
wt_h3k27ac.q.05_peak_40919	wt_h3k27ac.q.05_peak_40919	-1.42959	2.526	15.4921	8.28488e-05	0.0103694
wt_h3k27ac.q.05_peak_57650	wt_h3k27ac.q.05_peak_57650	-1.74166	2.01382	15.4879	8.30349e-05	0.0103721
wt_h3k27ac.q.05_peak_48535	wt_h3k27ac.q.05_peak_48535	0.659961	4.38246	15.4684	8.38976e-05	0.0104386
wt_h3k27ac.q.05_peak_25681	wt_h3k27ac.q.05_peak_25681	-1.76337	2.12749	15.4684	8.38977e-05	0.0104386
wt_h3k27ac.q.05_peak_9522	wt_h3k27ac.q.05_peak_9522	-1.36055	2.5425	15.4422	8.5066e-05	0.0105631
wt_h3k27ac.q.05_peak_23907	wt_h3k27ac.q.05_peak_23907	-1.11991	3.00191	15.4164	8.62352e-05	0.0105874
wt_h3k27ac.q.05_peak_41788	wt_h3k27ac.q.05_peak_41788	-1.54861	2.25302	15.4158	8.62661e-05	0.0105874
wt_h3k27ac.q.05_peak_45782	wt_h3k27ac.q.05_peak_45782	-1.54861	2.25301	15.4157	8.62673e-05	0.0105874
wt_h3k27ac.q.05_peak_63464	wt_h3k27ac.q.05_peak_63464	-1.54861	2.25301	15.4157	8.62674e-05	0.0105874
wt_h3k27ac.q.05_peak_37248	wt_h3k27ac.q.05_peak_37248	-1.54861	2.253	15.4157	8.62685e-05	0.0105874
wt_h3k27ac.q.05_peak_33455	wt_h3k27ac.q.05_peak_33455	-1.54861	2.25299	15.4157	8.62687e-05	0.0105874
wt_h3k27ac.q.05_peak_44967	wt_h3k27ac.q.05_peak_44967	-1.1478	2.94103	15.4069	8.66705e-05	0.010616
wt_h3k27ac.q.05_peak_6556	wt_h3k27ac.q.05_peak_6556	0.573241	4.95982	15.4028	8.68599e-05	0.0106186
wt_h3k27ac.q.05_peak_37899	wt_h3k27ac.q.05_peak_37899	-0.652862	4.40495	15.3522	8.92174e-05	0.0108857
wt_h3k27ac.q.05_peak_49062	wt_h3k27ac.q.05_peak_49062	0.783672	4.01984	15.3395	8.9817e-05	0.0109199
wt_h3k27ac.q.05_peak_53123	wt_h3k27ac.q.05_peak_53123	-0.464957	5.67733	15.339	8.98437e-05	0.0109199
wt_h3k27ac.q.05_peak_67454	wt_h3k27ac.q.05_peak_67454	-0.947339	3.69034	15.3149	9.09981e-05	0.0109875
wt_h3k27ac.q.05_peak_32360	wt_h3k27ac.q.05_peak_32360	0.309508	6.51165	15.3147	9.10045e-05	0.0109875
wt_h3k27ac.q.05_peak_40087	wt_h3k27ac.q.05_peak_40087	-1.32757	2.92855	15.3133	9.10738e-05	0.0109875
wt_h3k27ac.q.05_peak_81652	wt_h3k27ac.q.05_peak_81652	0.387292	6.06485	15.3061	9.1421e-05	0.0109875
wt_h3k27ac.q.05_peak_17856	wt_h3k27ac.q.05_peak_17856	0.63346	4.47982	15.3052	9.14649e-05	0.0109875
wt_h3k27ac.q.05_peak_39890	wt_h3k27ac.q.05_peak_39890	-1.30762	2.62224	15.302	9.16173e-05	0.0109875
wt_h3k27ac.q.05_peak_69111	wt_h3k27ac.q.05_peak_69111	-1.30761	2.62223	15.302	9.16193e-05	0.0109875
wt_h3k27ac.q.05_peak_67502	wt_h3k27ac.q.05_peak_67502	-1.25988	2.92858	15.2884	9.22839e-05	0.0109994
wt_h3k27ac.q.05_peak_43466	wt_h3k27ac.q.05_peak_43466	-1.53257	2.65293	15.2873	9.2333e-05	0.0109994
wt_h3k27ac.q.05_peak_14294	wt_h3k27ac.q.05_peak_14294	0.629546	5.84159	15.2865	9.23739e-05	0.0109994
wt_h3k27ac.q.05_peak_13353	wt_h3k27ac.q.05_peak_13353	-0.96651	3.35918	15.2856	9.2416e-05	0.0109994
wt_h3k27ac.q.05_peak_6922	wt_h3k27ac.q.05_peak_6922	1.33319	2.82468	15.2813	9.26276e-05	0.0110039
wt_h3k27ac.q.05_peak_46842	wt_h3k27ac.q.05_peak_46842	0.714596	4.14391	15.2232	9.55225e-05	0.0113217
wt_h3k27ac.q.05_peak_54318	wt_h3k27ac.q.05_peak_54318	-1.74162	2.01381	15.2105	9.61681e-05	0.0113217
wt_h3k27ac.q.05_peak_82993	wt_h3k27ac.q.05_peak_82993	-0.436398	5.51554	15.2087	9.62564e-05	0.0113217
wt_h3k27ac.q.05_peak_52580	wt_h3k27ac.q.05_peak_52580	-1.57781	2.55878	15.2081	9.62897e-05	0.0113217
wt_h3k27ac.q.05_peak_16258	wt_h3k27ac.q.05_peak_16258	-1.61078	2.29252	15.2047	9.64633e-05	0.0113217
wt_h3k27ac.q.05_peak_26112	wt_h3k27ac.q.05_peak_26112	-1.26146	2.69778	15.2028	9.65589e-05	0.0113217
wt_h3k27ac.q.05_peak_61644	wt_h3k27ac.q.05_peak_61644	-1.26146	2.69777	15.2028	9.65596e-05	0.0113217
wt_h3k27ac.q.05_peak_30531	wt_h3k27ac.q.05_peak_30531	-1.58061	2.19161	15.1959	9.69154e-05	0.0113423
wt_h3k27ac.q.05_peak_76238	wt_h3k27ac.q.05_peak_76238	0.737814	4.05477	15.1909	9.71701e-05	0.0113459
wt_h3k27ac.q.05_peak_68471	wt_h3k27ac.q.05_peak_68471	0.759757	4.12762	15.1883	9.73056e-05	0.0113459
wt_h3k27ac.q.05_peak_18569	wt_h3k27ac.q.05_peak_18569	0.387524	5.84976	15.183	9.75759e-05	0.0113564
wt_h3k27ac.q.05_peak_25176	wt_h3k27ac.q.05_peak_25176	-2.06614	1.86445	15.1787	9.77999e-05	0.0113615
wt_h3k27ac.q.05_peak_74302	wt_h3k27ac.q.05_peak_74302	0.837065	3.79057	15.1734	9.80749e-05	0.0113725
wt_h3k27ac.q.05_peak_36000	wt_h3k27ac.q.05_peak_36000	-0.881633	3.58288	15.1389	9.98836e-05	0.0115179
wt_h3k27ac.q.05_peak_29521	wt_h3k27ac.q.05_peak_29521	-1.22085	2.76958	15.1375	9.99603e-05	0.0115179
wt_h3k27ac.q.05_peak_10008	wt_h3k27ac.q.05_peak_10008	-1.22085	2.76956	15.1374	9.99627e-05	0.0115179
wt_h3k27ac.q.05_peak_58580	wt_h3k27ac.q.05_peak_58580	0.747357	4.01396	15.1223	0.000100767	0.0115179
wt_h3k27ac.q.05_peak_25418	wt_h3k27ac.q.05_peak_25418	0.208559	7.65983	15.1201	0.000100884	0.0115179
wt_h3k27ac.q.05_peak_10132	wt_h3k27ac.q.05_peak_10132	-1.09756	3.02558	15.1173	0.000101031	0.0115179
wt_h3k27ac.q.05_peak_81663	wt_h3k27ac.q.05_peak_81663	0.693692	4.52614	15.1128	0.000101273	0.0115179
wt_h3k27ac.q.05_peak_78556	wt_h3k27ac.q.05_peak_78556	-1.46452	2.34986	15.1118	0.000101328	0.0115179
wt_h3k27ac.q.05_peak_68087	wt_h3k27ac.q.05_peak_68087	-1.46452	2.34986	15.1118	0.000101328	0.0115179
wt_h3k27ac.q.05_peak_9772	wt_h3k27ac.q.05_peak_9772	0.537615	4.91612	15.1099	0.00010143	0.0115179
wt_h3k27ac.q.05_peak_3472	wt_h3k27ac.q.05_peak_3472	-0.712822	4.14375	15.1063	0.000101626	0.0115179
wt_h3k27ac.q.05_peak_8817	wt_h3k27ac.q.05_peak_8817	-1.18483	2.83796	15.1002	0.000101952	0.0115179
wt_h3k27ac.q.05_peak_44187	wt_h3k27ac.q.05_peak_44187	-1.18483	2.83796	15.1002	0.000101953	0.0115179
wt_h3k27ac.q.05_peak_55171	wt_h3k27ac.q.05_peak_55171	0.347398	6.15614	15.0981	0.000102067	0.0115179
wt_h3k27ac.q.05_peak_18949	wt_h3k27ac.q.05_peak_18949	-0.997292	3.26297	15.0981	0.000102068	0.0115179
wt_h3k27ac.q.05_peak_60384	wt_h3k27ac.q.05_peak_60384	0.300627	6.57519	15.0932	0.000102333	0.0115272
wt_h3k27ac.q.05_peak_40956	wt_h3k27ac.q.05_peak_40956	1.33332	2.91608	15.082	0.000102939	0.0115749
wt_h3k27ac.q.05_peak_80681	wt_h3k27ac.q.05_peak_80681	-1.71782	2.19162	15.0656	0.000103836	0.0116409
wt_h3k27ac.q.05_peak_31705	wt_h3k27ac.q.05_peak_31705	-0.583622	4.68666	15.0646	0.000103896	0.0116409
wt_h3k27ac.q.05_peak_50087	wt_h3k27ac.q.05_peak_50087	0.324907	6.68333	15.0575	0.000104287	0.0116641
wt_h3k27ac.q.05_peak_40461	wt_h3k27ac.q.05_peak_40461	-1.37345	3.00194	15.0449	0.000104985	0.0117213
wt_h3k27ac.q.05_peak_72339	wt_h3k27ac.q.05_peak_72339	0.586943	4.66445	15.0287	0.000105886	0.0117954
wt_h3k27ac.q.05_peak_75894	wt_h3k27ac.q.05_peak_75894	-0.796913	3.83791	15.0252	0.000106085	0.0117954
wt_h3k27ac.q.05_peak_20119	wt_h3k27ac.q.05_peak_20119	0.716943	4.11666	15.023	0.000106209	0.0117954
wt_h3k27ac.q.05_peak_49808	wt_h3k27ac.q.05_peak_49808	0.901498	3.50945	15.0186	0.000106459	0.0118023
wt_h3k27ac.q.05_peak_63380	wt_h3k27ac.q.05_peak_63380	-1.3204	2.57493	15.0084	0.000107032	0.0118123
wt_h3k27ac.q.05_peak_68379	wt_h3k27ac.q.05_peak_68379	-1.3204	2.57492	15.0084	0.000107032	0.0118123
wt_h3k27ac.q.05_peak_52159	wt_h3k27ac.q.05_peak_52159	0.467975	5.29519	14.9965	0.00010771	0.0118123
wt_h3k27ac.q.05_peak_40118	wt_h3k27ac.q.05_peak_40118	0.223752	7.43649	14.9943	0.000107835	0.0118123
wt_h3k27ac.q.05_peak_60515	wt_h3k27ac.q.05_peak_60515	0.676102	4.30723	14.9927	0.000107929	0.0118123
wt_h3k27ac.q.05_peak_80191	wt_h3k27ac.q.05_peak_80191	-0.981754	3.4229	14.9924	0.000107948	0.0118123
wt_h3k27ac.q.05_peak_2750	wt_h3k27ac.q.05_peak_2750	0.362729	6.02139	14.9923	0.000107948	0.0118123
wt_h3k27ac.q.05_peak_43985	wt_h3k27ac.q.05_peak_43985	0.309441	6.48096	14.9906	0.000108047	0.0118123
wt_h3k27ac.q.05_peak_5393	wt_h3k27ac.q.05_peak_5393	0.447311	5.42091	14.9747	0.000108962	0.0118917
wt_h3k27ac.q.05_peak_82401	wt_h3k27ac.q.05_peak_82401	-1.09457	3.06032	14.9667	0.000109425	0.0119217
wt_h3k27ac.q.05_peak_7498	wt_h3k27ac.q.05_peak_7498	-1.77898	2.03729	14.9572	0.000109978	0.0119613
wt_h3k27ac.q.05_peak_49090	wt_h3k27ac.q.05_peak_49090	0.583791	4.67193	14.9503	0.000110382	0.0119662
wt_h3k27ac.q.05_peak_3971	wt_h3k27ac.q.05_peak_3971	-0.996336	3.37764	14.9499	0.000110403	0.0119662
wt_h3k27ac.q.05_peak_72442	wt_h3k27ac.q.05_peak_72442	-1.54853	2.25299	14.9388	0.000111055	0.0120163
wt_h3k27ac.q.05_peak_18105	wt_h3k27ac.q.05_peak_18105	-1.12717	3.11647	14.927	0.000111751	0.0120708
wt_h3k27ac.q.05_peak_62377	wt_h3k27ac.q.05_peak_62377	0.566403	4.7521	14.9114	0.000112679	0.0121502
wt_h3k27ac.q.05_peak_62618	wt_h3k27ac.q.05_peak_62618	-1.27168	2.65293	14.8998	0.000113377	0.0122047
wt_h3k27ac.q.05_peak_15799	wt_h3k27ac.q.05_peak_15799	0.371071	6.03607	14.8929	0.000113791	0.0122188
wt_h3k27ac.q.05_peak_8586	wt_h3k27ac.q.05_peak_8586	-1.39413	2.44064	14.8848	0.000114279	0.0122188
wt_h3k27ac.q.05_peak_68962	wt_h3k27ac.q.05_peak_68962	-1.39413	2.44064	14.8848	0.000114279	0.0122188
wt_h3k27ac.q.05_peak_77820	wt_h3k27ac.q.05_peak_77820	-1.39413	2.44061	14.8848	0.000114283	0.0122188
wt_h3k27ac.q.05_peak_27592	wt_h3k27ac.q.05_peak_27592	-1.37052	2.60661	14.866	0.000115425	0.0122828
wt_h3k27ac.q.05_peak_34779	wt_h3k27ac.q.05_peak_34779	-1.83013	2.17055	14.864	0.000115548	0.0122828
wt_h3k27ac.q.05_peak_13335	wt_h3k27ac.q.05_peak_13335	-1.48914	2.29253	14.8618	0.000115685	0.0122828
wt_h3k27ac.q.05_peak_35587	wt_h3k27ac.q.05_peak_35587	-1.48914	2.29252	14.8618	0.000115685	0.0122828
wt_h3k27ac.q.05_peak_25686	wt_h3k27ac.q.05_peak_25686	0.439025	5.46267	14.8573	0.000115957	0.0122828
wt_h3k27ac.q.05_peak_2867	wt_h3k27ac.q.05_peak_2867	0.400798	5.7217	14.8532	0.000116208	0.0122828
wt_h3k27ac.q.05_peak_34292	wt_h3k27ac.q.05_peak_34292	0.353175	6.08473	14.8526	0.000116245	0.0122828
wt_h3k27ac.q.05_peak_58365	wt_h3k27ac.q.05_peak_58365	0.274271	6.81881	14.8418	0.000116915	0.012315
wt_h3k27ac.q.05_peak_75767	wt_h3k27ac.q.05_peak_75767	0.402377	5.96436	14.8414	0.00011694	0.012315
wt_h3k27ac.q.05_peak_44999	wt_h3k27ac.q.05_peak_44999	-0.622232	4.48813	14.8319	0.000117531	0.0123461
wt_h3k27ac.q.05_peak_12266	wt_h3k27ac.q.05_peak_12266	-1.07611	3.04887	14.8297	0.000117668	0.0123461
wt_h3k27ac.q.05_peak_54663	wt_h3k27ac.q.05_peak_54663	-1.22901	2.72693	14.8272	0.000117823	0.0123461
wt_h3k27ac.q.05_peak_54377	wt_h3k27ac.q.05_peak_54377	0.870111	3.58306	14.815	0.000118592	0.0124061
wt_h3k27ac.q.05_peak_14211	wt_h3k27ac.q.05_peak_14211	0.472256	5.2507	14.8011	0.000119464	0.0124149
wt_h3k27ac.q.05_peak_46949	wt_h3k27ac.q.05_peak_46949	0.46686	5.28295	14.7991	0.00011959	0.0124149
wt_h3k27ac.q.05_peak_59779	wt_h3k27ac.q.05_peak_59779	-1.6572	2.06037	14.7981	0.000119659	0.0124149
wt_h3k27ac.q.05_peak_3079	wt_h3k27ac.q.05_peak_3079	-1.65719	2.06037	14.798	0.00011966	0.0124149
wt_h3k27ac.q.05_peak_70114	wt_h3k27ac.q.05_peak_70114	-1.65719	2.06036	14.798	0.00011966	0.0124149
wt_h3k27ac.q.05_peak_2382	wt_h3k27ac.q.05_peak_2382	-1.19133	2.79732	14.7846	0.000120516	0.0124832
wt_h3k27ac.q.05_peak_75258	wt_h3k27ac.q.05_peak_75258	0.323836	6.32762	14.7737	0.000121214	0.012504
wt_h3k27ac.q.05_peak_56725	wt_h3k27ac.q.05_peak_56725	-1.61656	2.12749	14.7691	0.000121511	0.012504
wt_h3k27ac.q.05_peak_37750	wt_h3k27ac.q.05_peak_37750	0.450606	5.38023	14.7682	0.000121572	0.012504
wt_h3k27ac.q.05_peak_81050	wt_h3k27ac.q.05_peak_81050	-1.15779	2.86445	14.767	0.000121643	0.012504
wt_h3k27ac.q.05_peak_32576	wt_h3k27ac.q.05_peak_32576	0.371821	6.61664	14.766	0.000121708	0.012504
wt_h3k27ac.q.05_peak_19143	wt_h3k27ac.q.05_peak_19143	-0.912622	3.45811	14.7503	0.000122725	0.012588
wt_h3k27ac.q.05_peak_64565	wt_h3k27ac.q.05_peak_64565	0.990304	3.24307	14.7362	0.000123648	0.0126621
wt_h3k27ac.q.05_peak_18166	wt_h3k27ac.q.05_peak_18166	-1.16763	2.95343	14.7179	0.000124852	0.0127243
wt_h3k27ac.q.05_peak_14897	wt_h3k27ac.q.05_peak_14897	-1.33426	2.52602	14.7178	0.00012486	0.0127243
wt_h3k27ac.q.05_peak_3186	wt_h3k27ac.q.05_peak_3186	-1.33426	2.52602	14.7178	0.000124861	0.0127243
wt_h3k27ac.q.05_peak_17907	wt_h3k27ac.q.05_peak_17907	-0.556165	4.78693	14.7138	0.000125129	0.012731
wt_h3k27ac.q.05_peak_64446	wt_h3k27ac.q.05_peak_64446	-1.72837	2.10543	14.6882	0.000126837	0.0128724
wt_h3k27ac.q.05_peak_51083	wt_h3k27ac.q.05_peak_51083	-0.652325	4.34514	14.6869	0.000126926	0.0128724
wt_h3k27ac.q.05_peak_10370	wt_h3k27ac.q.05_peak_10370	0.64431	4.37327	14.6641	0.000128467	0.0130077
wt_h3k27ac.q.05_peak_43139	wt_h3k27ac.q.05_peak_43139	0.859543	3.59891	14.6415	0.000130016	0.0131435
wt_h3k27ac.q.05_peak_48686	wt_h3k27ac.q.05_peak_48686	-1.24312	2.78351	14.631	0.000130747	0.0131532
wt_h3k27ac.q.05_peak_38611	wt_h3k27ac.q.05_peak_38611	-1.70357	1.98997	14.6259	0.000131104	0.0131532
wt_h3k27ac.q.05_peak_35378	wt_h3k27ac.q.05_peak_35378	-1.70357	1.98997	14.6258	0.000131104	0.0131532
wt_h3k27ac.q.05_peak_48415	wt_h3k27ac.q.05_peak_48415	-0.444496	5.40722	14.6244	0.000131204	0.0131532
wt_h3k27ac.q.05_peak_8878	wt_h3k27ac.q.05_peak_8878	-0.388493	5.79033	14.623	0.000131304	0.0131532
wt_h3k27ac.q.05_peak_58608	wt_h3k27ac.q.05_peak_58608	-1.51646	2.23283	14.6203	0.00013149	0.0131532
wt_h3k27ac.q.05_peak_17888	wt_h3k27ac.q.05_peak_17888	-1.03448	3.12744	14.6143	0.000131907	0.0131532
wt_h3k27ac.q.05_peak_33081	wt_h3k27ac.q.05_peak_33081	-1.4133	2.38687	14.6132	0.000131985	0.0131532
wt_h3k27ac.q.05_peak_82030	wt_h3k27ac.q.05_peak_82030	-1.4133	2.38685	14.6132	0.000131989	0.0131532
wt_h3k27ac.q.05_peak_5024	wt_h3k27ac.q.05_peak_5024	0.476824	5.20478	14.6084	0.000132326	0.013166
wt_h3k27ac.q.05_peak_61983	wt_h3k27ac.q.05_peak_61983	0.672194	4.37787	14.5866	0.000133865	0.0132982
wt_h3k27ac.q.05_peak_33391	wt_h3k27ac.q.05_peak_33391	-1.13496	3.04887	14.5654	0.000135374	0.0134269
wt_h3k27ac.q.05_peak_38919	wt_h3k27ac.q.05_peak_38919	-1.0555	3.07176	14.5527	0.000136296	0.0134403
wt_h3k27ac.q.05_peak_70056	wt_h3k27ac.q.05_peak_70056	-1.0555	3.07174	14.5526	0.000136301	0.0134403
wt_h3k27ac.q.05_peak_6497	wt_h3k27ac.q.05_peak_6497	-0.627991	4.4362	14.5523	0.000136322	0.0134403
wt_h3k27ac.q.05_peak_38251	wt_h3k27ac.q.05_peak_38251	0.68198	4.20734	14.5489	0.000136568	0.0134403
wt_h3k27ac.q.05_peak_56446	wt_h3k27ac.q.05_peak_56446	-1.03476	4.14369	14.5488	0.000136575	0.0134403
wt_h3k27ac.q.05_peak_26378	wt_h3k27ac.q.05_peak_26378	1.10946	2.94117	14.5295	0.000137979	0.0135574
wt_h3k27ac.q.05_peak_61735	wt_h3k27ac.q.05_peak_61735	-0.731504	4.01966	14.5258	0.000138255	0.0135634
wt_h3k27ac.q.05_peak_189	wt_h3k27ac.q.05_peak_189	0.974573	3.26312	14.5118	0.000139281	0.0136428
wt_h3k27ac.q.05_peak_20878	wt_h3k27ac.q.05_peak_20878	0.816817	3.71983	14.5035	0.000139899	0.0136822
wt_h3k27ac.q.05_peak_54213	wt_h3k27ac.q.05_peak_54213	-1.41684	3.23273	14.4976	0.000140339	0.0137039
wt_h3k27ac.q.05_peak_1085	wt_h3k27ac.q.05_peak_1085	-1.75701	1.91597	14.4768	0.000141897	0.0138138
wt_h3k27ac.q.05_peak_35656	wt_h3k27ac.q.05_peak_35656	0.867581	3.55894	14.4741	0.000142099	0.0138138
wt_h3k27ac.q.05_peak_54190	wt_h3k27ac.q.05_peak_54190	0.49976	5.55706	14.4738	0.000142122	0.0138138
wt_h3k27ac.q.05_peak_34310	wt_h3k27ac.q.05_peak_34310	-1.19827	2.7555	14.4699	0.00014242	0.0138215
wt_h3k27ac.q.05_peak_59334	wt_h3k27ac.q.05_peak_59334	0.314382	6.38248	14.462	0.000143014	0.0138579
wt_h3k27ac.q.05_peak_18596	wt_h3k27ac.q.05_peak_18596	-1.16326	2.82453	14.4479	0.000144091	0.0139394
wt_h3k27ac.q.05_peak_52767	wt_h3k27ac.q.05_peak_52767	0.654999	4.30725	14.4452	0.000144297	0.0139394
wt_h3k27ac.q.05_peak_6752	wt_h3k27ac.q.05_peak_6752	-0.997771	3.202	14.4392	0.000144757	0.0139624
wt_h3k27ac.q.05_peak_76740	wt_h3k27ac.q.05_peak_76740	-0.692208	4.15983	14.4361	0.000144996	0.0139641
wt_h3k27ac.q.05_peak_34395	wt_h3k27ac.q.05_peak_34395	-1.21276	3.17055	14.4082	0.000147162	0.0141511
wt_h3k27ac.q.05_peak_6248	wt_h3k27ac.q.05_peak_6248	-1.05548	3.07173	14.3984	0.000147925	0.014185
wt_h3k27ac.q.05_peak_26215	wt_h3k27ac.q.05_peak_26215	-1.00629	3.72693	14.3979	0.000147964	0.014185
wt_h3k27ac.q.05_peak_76023	wt_h3k27ac.q.05_peak_76023	-1.54696	2.17055	14.3889	0.000148675	0.0141925
wt_h3k27ac.q.05_peak_74800	wt_h3k27ac.q.05_peak_74800	-1.54696	2.17055	14.3889	0.000148676	0.0141925
wt_h3k27ac.q.05_peak_77494	wt_h3k27ac.q.05_peak_77494	0.385058	5.83317	14.3884	0.000148718	0.0141925
wt_h3k27ac.q.05_peak_78730	wt_h3k27ac.q.05_peak_78730	0.63162	4.40062	14.3836	0.000149093	0.0142068
wt_h3k27ac.q.05_peak_59300	wt_h3k27ac.q.05_peak_59300	-0.595085	4.56685	14.3748	0.000149793	0.0142509
wt_h3k27ac.q.05_peak_28444	wt_h3k27ac.q.05_peak_28444	0.920434	3.39608	14.3711	0.000150091	0.0142509
wt_h3k27ac.q.05_peak_65286	wt_h3k27ac.q.05_peak_65286	1.5219	2.79742	14.3693	0.000150233	0.0142509
wt_h3k27ac.q.05_peak_66058	wt_h3k27ac.q.05_peak_66058	0.497569	5.06052	14.3601	0.000150968	0.0142532
wt_h3k27ac.q.05_peak_53024	wt_h3k27ac.q.05_peak_53024	0.497566	5.06055	14.3599	0.000150981	0.0142532
wt_h3k27ac.q.05_peak_27693	wt_h3k27ac.q.05_peak_27693	0.497566	5.06055	14.3599	0.000150983	0.0142532
wt_h3k27ac.q.05_peak_9471	wt_h3k27ac.q.05_peak_9471	-1.01592	3.14917	14.3577	0.000151161	0.0142532
wt_h3k27ac.q.05_peak_11821	wt_h3k27ac.q.05_peak_11821	0.654675	4.41412	14.3488	0.000151876	0.0142992
wt_h3k27ac.q.05_peak_12180	wt_h3k27ac.q.05_peak_12180	0.671784	4.22786	14.3378	0.000152767	0.0143617
wt_h3k27ac.q.05_peak_9229	wt_h3k27ac.q.05_peak_9229	-1.51651	2.23285	14.3342	0.000153056	0.0143666
wt_h3k27ac.q.05_peak_15802	wt_h3k27ac.q.05_peak_15802	-1.19128	2.7973	14.3315	0.000153275	0.0143666
wt_h3k27ac.q.05_peak_31797	wt_h3k27ac.q.05_peak_31797	-0.709182	4.08306	14.3182	0.000154369	0.0144477
wt_h3k27ac.q.05_peak_54653	wt_h3k27ac.q.05_peak_54653	0.876131	3.51782	14.3093	0.000155095	0.0144941
wt_h3k27ac.q.05_peak_14257	wt_h3k27ac.q.05_peak_14257	-0.92311	3.38684	14.3008	0.000155802	0.0145022
wt_h3k27ac.q.05_peak_14849	wt_h3k27ac.q.05_peak_14849	-0.923108	3.38682	14.3007	0.000155806	0.0145022
wt_h3k27ac.q.05_peak_76100	wt_h3k27ac.q.05_peak_76100	-1.29458	2.55879	14.2999	0.000155871	0.0145022
wt_h3k27ac.q.05_peak_22201	wt_h3k27ac.q.05_peak_22201	0.627504	4.40963	14.2926	0.000156481	0.0145375
wt_h3k27ac.q.05_peak_4338	wt_h3k27ac.q.05_peak_4338	0.363608	5.94277	14.269	0.00015845	0.0146988
wt_h3k27ac.q.05_peak_69334	wt_h3k27ac.q.05_peak_69334	-0.624657	4.42292	14.266	0.000158703	0.0147006
wt_h3k27ac.q.05_peak_43371	wt_h3k27ac.q.05_peak_43371	0.430023	5.46268	14.2607	0.000159152	0.0147087
wt_h3k27ac.q.05_peak_61597	wt_h3k27ac.q.05_peak_61597	0.45976	5.27307	14.2593	0.000159269	0.0147087
wt_h3k27ac.q.05_peak_69475	wt_h3k27ac.q.05_peak_69475	-0.552829	4.75898	14.2567	0.000159489	0.0147087
wt_h3k27ac.q.05_peak_12840	wt_h3k27ac.q.05_peak_12840	-0.782856	3.81094	14.2373	0.000161146	0.0148398
wt_h3k27ac.q.05_peak_24779	wt_h3k27ac.q.05_peak_24779	0.472235	5.34305	14.2319	0.000161605	0.0148603
wt_h3k27ac.q.05_peak_63591	wt_h3k27ac.q.05_peak_63591	0.53229	4.85801	14.2224	0.000162429	0.0148838
wt_h3k27ac.q.05_peak_79573	wt_h3k27ac.q.05_peak_79573	-0.966526	3.35919	14.2183	0.000162783	0.0148838
wt_h3k27ac.q.05_peak_61097	wt_h3k27ac.q.05_peak_61097	-1.38027	2.66806	14.2137	0.000163182	0.0148838
wt_h3k27ac.q.05_peak_34408	wt_h3k27ac.q.05_peak_34408	-1.24717	2.63765	14.211	0.000163409	0.0148838
wt_h3k27ac.q.05_peak_509	wt_h3k27ac.q.05_peak_509	-1.24717	2.63765	14.211	0.000163411	0.0148838
wt_h3k27ac.q.05_peak_9001	wt_h3k27ac.q.05_peak_9001	-1.24717	2.63764	14.211	0.000163412	0.0148838
wt_h3k27ac.q.05_peak_65316	wt_h3k27ac.q.05_peak_65316	0.55409	4.745	14.2099	0.000163512	0.0148838
wt_h3k27ac.q.05_peak_74712	wt_h3k27ac.q.05_peak_74712	-1.46118	2.60663	14.1802	0.000166106	0.015031
wt_h3k27ac.q.05_peak_11699	wt_h3k27ac.q.05_peak_11699	0.31542	6.34424	14.1801	0.000166118	0.015031
wt_h3k27ac.q.05_peak_16007	wt_h3k27ac.q.05_peak_16007	0.907515	3.41414	14.177	0.00016639	0.015031
wt_h3k27ac.q.05_peak_53443	wt_h3k27ac.q.05_peak_53443	0.632177	4.37783	14.1761	0.00016647	0.015031
wt_h3k27ac.q.05_peak_48409	wt_h3k27ac.q.05_peak_48409	-0.738733	3.95958	14.1759	0.00016649	0.015031
wt_h3k27ac.q.05_peak_16102	wt_h3k27ac.q.05_peak_16102	0.947426	3.35934	14.1751	0.000166558	0.015031
wt_h3k27ac.q.05_peak_33352	wt_h3k27ac.q.05_peak_33352	-1.58125	2.10545	14.1694	0.000167064	0.0150482
wt_h3k27ac.q.05_peak_74792	wt_h3k27ac.q.05_peak_74792	-1.08177	3.22257	14.1672	0.00016726	0.0150482
wt_h3k27ac.q.05_peak_45261	wt_h3k27ac.q.05_peak_45261	0.456615	5.28289	14.1644	0.000167507	0.0150482
wt_h3k27ac.q.05_peak_13942	wt_h3k27ac.q.05_peak_13942	-1.77888	2.03729	14.1622	0.000167703	0.0150482
wt_h3k27ac.q.05_peak_25896	wt_h3k27ac.q.05_peak_25896	-1.20195	3.42285	14.1566	0.000168208	0.0150564
wt_h3k27ac.q.05_peak_19334	wt_h3k27ac.q.05_peak_19334	0.509258	4.97503	14.1559	0.000168272	0.0150564
wt_h3k27ac.q.05_peak_80622	wt_h3k27ac.q.05_peak_80622	-1.36577	2.42293	14.1472	0.000169051	0.0150622
wt_h3k27ac.q.05_peak_64448	wt_h3k27ac.q.05_peak_64448	-1.36577	2.42293	14.1472	0.000169051	0.0150622
wt_h3k27ac.q.05_peak_8189	wt_h3k27ac.q.05_peak_8189	-1.36577	2.42292	14.1471	0.000169054	0.0150622
wt_h3k27ac.q.05_peak_82860	wt_h3k27ac.q.05_peak_82860	-0.712068	4.05456	14.1386	0.000169821	0.015091
wt_h3k27ac.q.05_peak_80030	wt_h3k27ac.q.05_peak_80030	-1.05074	3.49245	14.1383	0.000169854	0.015091
wt_h3k27ac.q.05_peak_8782	wt_h3k27ac.q.05_peak_8782	-1.16909	2.78353	14.1295	0.000170645	0.0151192
wt_h3k27ac.q.05_peak_11665	wt_h3k27ac.q.05_peak_11665	-1.16909	2.7835	14.1294	0.000170651	0.0151192
wt_h3k27ac.q.05_peak_38157	wt_h3k27ac.q.05_peak_38157	-1.13653	2.85124	14.1262	0.000170943	0.0151238
wt_h3k27ac.q.05_peak_82610	wt_h3k27ac.q.05_peak_82610	1.24779	2.62233	14.1224	0.000171289	0.0151332
wt_h3k27ac.q.05_peak_36570	wt_h3k27ac.q.05_peak_36570	0.61943	4.42752	14.1138	0.000172075	0.0151721
wt_h3k27ac.q.05_peak_78863	wt_h3k27ac.q.05_peak_78863	-0.761827	3.87096	14.11	0.000172424	0.0151721
wt_h3k27ac.q.05_peak_48584	wt_h3k27ac.q.05_peak_48584	-0.998028	3.17052	14.1097	0.000172451	0.0151721
wt_h3k27ac.q.05_peak_80957	wt_h3k27ac.q.05_peak_80957	-1.45769	2.27291	14.088	0.000174452	0.0153267
wt_h3k27ac.q.05_peak_80875	wt_h3k27ac.q.05_peak_80875	-0.539016	4.81097	14.0729	0.000175861	0.0153989
wt_h3k27ac.q.05_peak_75644	wt_h3k27ac.q.05_peak_75644	-0.819113	3.6755	14.0728	0.000175869	0.0153989
wt_h3k27ac.q.05_peak_34941	wt_h3k27ac.q.05_peak_34941	0.512742	4.94744	14.0713	0.000176006	0.0153989
wt_h3k27ac.q.05_peak_24887	wt_h3k27ac.q.05_peak_24887	-0.803137	3.72692	14.0681	0.000176313	0.0154044
wt_h3k27ac.q.05_peak_40474	wt_h3k27ac.q.05_peak_40474	-0.731775	3.97182	14.0421	0.00017876	0.0155915
wt_h3k27ac.q.05_peak_42120	wt_h3k27ac.q.05_peak_42120	-2.16173	2.29249	14.0402	0.000178948	0.0155915
wt_h3k27ac.q.05_peak_61394	wt_h3k27ac.q.05_peak_61394	-0.411232	5.56882	14.0338	0.000179552	0.0156033
wt_h3k27ac.q.05_peak_50878	wt_h3k27ac.q.05_peak_50878	0.6799	4.16537	14.0335	0.000179578	0.0156033
wt_h3k27ac.q.05_peak_78156	wt_h3k27ac.q.05_peak_78156	0.377335	5.8095	14.0053	0.000182294	0.0157874
wt_h3k27ac.q.05_peak_2576	wt_h3k27ac.q.05_peak_2576	0.297298	6.49801	14.0045	0.000182375	0.0157874
wt_h3k27ac.q.05_peak_82434	wt_h3k27ac.q.05_peak_82434	-1.30748	2.50933	14.0037	0.000182449	0.0157874
wt_h3k27ac.q.05_peak_28913	wt_h3k27ac.q.05_peak_28913	0.293515	7.11548	13.9937	0.000183423	0.01585
wt_h3k27ac.q.05_peak_28521	wt_h3k27ac.q.05_peak_28521	0.714706	4.02574	13.9858	0.000184193	0.0158948
wt_h3k27ac.q.05_peak_67451	wt_h3k27ac.q.05_peak_67451	-1.32025	2.5749	13.9749	0.00018527	0.0159659
wt_h3k27ac.q.05_peak_56762	wt_h3k27ac.q.05_peak_56762	0.522528	4.88416	13.9684	0.000185912	0.0159994
wt_h3k27ac.q.05_peak_81687	wt_h3k27ac.q.05_peak_81687	-1.62008	2.0373	13.9642	0.000186324	0.0160129
wt_h3k27ac.q.05_peak_44425	wt_h3k27ac.q.05_peak_44425	0.529015	4.84811	13.9527	0.000187465	0.0160891
wt_h3k27ac.q.05_peak_67534	wt_h3k27ac.q.05_peak_67534	0.424893	5.46477	13.9469	0.000188046	0.0161069
wt_h3k27ac.q.05_peak_64998	wt_h3k27ac.q.05_peak_64998	0.345709	6.05481	13.9455	0.000188183	0.0161069
wt_h3k27ac.q.05_peak_4984	wt_h3k27ac.q.05_peak_4984	0.687004	4.12763	13.9372	0.000189025	0.0161356
wt_h3k27ac.q.05_peak_75172	wt_h3k27ac.q.05_peak_75172	0.687003	4.12762	13.9371	0.00018903	0.0161356
wt_h3k27ac.q.05_peak_32386	wt_h3k27ac.q.05_peak_32386	0.652308	4.26811	13.9341	0.000189333	0.0161395
wt_h3k27ac.q.05_peak_42902	wt_h3k27ac.q.05_peak_42902	-1.40882	2.89037	13.9316	0.000189587	0.0161395
wt_h3k27ac.q.05_peak_4319	wt_h3k27ac.q.05_peak_4319	0.265526	6.81974	13.9221	0.000190543	0.016199
wt_h3k27ac.q.05_peak_15173	wt_h3k27ac.q.05_peak_15173	-0.826262	3.63765	13.9187	0.000190888	0.0162064
wt_h3k27ac.q.05_peak_28396	wt_h3k27ac.q.05_peak_28396	-0.794124	3.74127	13.9107	0.000191707	0.0162541
wt_h3k27ac.q.05_peak_50877	wt_h3k27ac.q.05_peak_50877	0.217287	7.41138	13.9072	0.000192058	0.016262
wt_h3k27ac.q.05_peak_47760	wt_h3k27ac.q.05_peak_47760	0.600131	4.49262	13.8952	0.000193288	0.0163443
wt_h3k27ac.q.05_peak_67854	wt_h3k27ac.q.05_peak_67854	0.363677	5.90346	13.8916	0.000193657	0.0163536
wt_h3k27ac.q.05_peak_57286	wt_h3k27ac.q.05_peak_57286	0.448433	5.76097	13.8748	0.000195404	0.016479
wt_h3k27ac.q.05_peak_15494	wt_h3k27ac.q.05_peak_15494	-1.38378	2.36847	13.8681	0.0001961	0.0164879
wt_h3k27ac.q.05_peak_27957	wt_h3k27ac.q.05_peak_27957	0.540381	4.78022	13.8677	0.000196145	0.0164879
wt_h3k27ac.q.05_peak_26709	wt_h3k27ac.q.05_peak_26709	0.555846	4.70164	13.8662	0.000196294	0.0164879
wt_h3k27ac.q.05_peak_25934	wt_h3k27ac.q.05_peak_25934	0.468192	5.1813	13.8607	0.000196867	0.0165049
wt_h3k27ac.q.05_peak_23183	wt_h3k27ac.q.05_peak_23183	0.384323	5.74153	13.8559	0.000197376	0.0165049
wt_h3k27ac.q.05_peak_19228	wt_h3k27ac.q.05_peak_19228	-0.934838	3.31189	13.8553	0.000197442	0.0165049
wt_h3k27ac.q.05_peak_79642	wt_h3k27ac.q.05_peak_79642	-1.08384	2.94107	13.8504	0.000197952	0.0165049
wt_h3k27ac.q.05_peak_21725	wt_h3k27ac.q.05_peak_21725	-1.21367	2.66804	13.8437	0.000198664	0.0165049
wt_h3k27ac.q.05_peak_82562	wt_h3k27ac.q.05_peak_82562	-1.21367	2.66803	13.8437	0.000198666	0.0165049
wt_h3k27ac.q.05_peak_49961	wt_h3k27ac.q.05_peak_49961	-1.21367	2.66804	13.8437	0.000198667	0.0165049
wt_h3k27ac.q.05_peak_28140	wt_h3k27ac.q.05_peak_28140	-1.16559	3.24293	13.8421	0.000198828	0.0165049
wt_h3k27ac.q.05_peak_32181	wt_h3k27ac.q.05_peak_32181	1.1154	2.86452	13.8419	0.000198851	0.0165049
wt_h3k27ac.q.05_peak_64822	wt_h3k27ac.q.05_peak_64822	-1.48358	2.21236	13.8364	0.000199434	0.0165316
wt_h3k27ac.q.05_peak_39990	wt_h3k27ac.q.05_peak_39990	0.579446	4.58309	13.8331	0.000199786	0.0165389
wt_h3k27ac.q.05_peak_38440	wt_h3k27ac.q.05_peak_38440	1.02452	3.07189	13.8181	0.00020139	0.0166183
wt_h3k27ac.q.05_peak_9903	wt_h3k27ac.q.05_peak_9903	-2.57495	2.21231	13.8177	0.000201432	0.0166183
wt_h3k27ac.q.05_peak_71470	wt_h3k27ac.q.05_peak_71470	-0.604898	4.8578	13.8167	0.000201534	0.0166183
wt_h3k27ac.q.05_peak_62297	wt_h3k27ac.q.05_peak_62297	-1.17532	2.74128	13.8118	0.000202064	0.0166402
wt_h3k27ac.q.05_peak_33658	wt_h3k27ac.q.05_peak_33658	-1.14136	2.811	13.8048	0.000202815	0.0166803
wt_h3k27ac.q.05_peak_68562	wt_h3k27ac.q.05_peak_68562	0.165368	8.22541	13.7871	0.000204735	0.0168076
wt_h3k27ac.q.05_peak_68663	wt_h3k27ac.q.05_peak_68663	0.717273	3.9961	13.7856	0.000204896	0.0168076
wt_h3k27ac.q.05_peak_36121	wt_h3k27ac.q.05_peak_36121	0.232989	7.18986	13.778	0.00020573	0.0168541
wt_h3k27ac.q.05_peak_229	wt_h3k27ac.q.05_peak_229	0.451795	5.39157	13.7676	0.000206877	0.0169261
wt_h3k27ac.q.05_peak_75626	wt_h3k27ac.q.05_peak_75626	0.70249	4.04901	13.754	0.000208375	0.0170266
wt_h3k27ac.q.05_peak_73828	wt_h3k27ac.q.05_peak_73828	-0.794191	3.81777	13.7455	0.000209324	0.017082
wt_h3k27ac.q.05_peak_79934	wt_h3k27ac.q.05_peak_79934	-1.3266	3.01381	13.7414	0.000209775	0.0170967
wt_h3k27ac.q.05_peak_48677	wt_h3k27ac.q.05_peak_48677	-1.15278	3.0603	13.7385	0.000210101	0.0171012
wt_h3k27ac.q.05_peak_66322	wt_h3k27ac.q.05_peak_66322	-0.536254	5.12465	13.7279	0.000211293	0.017176
wt_h3k27ac.q.05_peak_61339	wt_h3k27ac.q.05_peak_61339	0.380591	5.75574	13.7249	0.000211626	0.017181
wt_h3k27ac.q.05_peak_14422	wt_h3k27ac.q.05_peak_14422	0.47466	5.12768	13.7159	0.000212647	0.0172416
wt_h3k27ac.q.05_peak_77353	wt_h3k27ac.q.05_peak_77353	-1.50539	2.57491	13.7027	0.000214148	0.017341
wt_h3k27ac.q.05_peak_16931	wt_h3k27ac.q.05_peak_16931	-1.01741	3.08306	13.6993	0.000214536	0.0173502
wt_h3k27ac.q.05_peak_14560	wt_h3k27ac.q.05_peak_14560	0.801353	3.69053	13.6837	0.000216327	0.0174726
wt_h3k27ac.q.05_peak_71363	wt_h3k27ac.q.05_peak_71363	-1.60801	2.36845	13.6674	0.000218209	0.0175836
wt_h3k27ac.q.05_peak_52684	wt_h3k27ac.q.05_peak_52684	-1.58121	2.10545	13.667	0.000218258	0.0175836
wt_h3k27ac.q.05_peak_73949	wt_h3k27ac.q.05_peak_73949	-0.711655	4.00782	13.6547	0.000219688	0.0176762
wt_h3k27ac.q.05_peak_61186	wt_h3k27ac.q.05_peak_61186	0.607879	4.43195	13.6464	0.000220666	0.0177162
wt_h3k27ac.q.05_peak_13179	wt_h3k27ac.q.05_peak_13179	-1.58088	2.19162	13.6457	0.000220747	0.0177162
wt_h3k27ac.q.05_peak_54448	wt_h3k27ac.q.05_peak_54448	-0.96412	3.21235	13.6386	0.000221584	0.0177383
wt_h3k27ac.q.05_peak_44558	wt_h3k27ac.q.05_peak_44558	-0.96412	3.21235	13.6386	0.000221585	0.0177383
wt_h3k27ac.q.05_peak_38937	wt_h3k27ac.q.05_peak_38937	0.648522	4.25316	13.63	0.000222602	0.0177881
wt_h3k27ac.q.05_peak_4892	wt_h3k27ac.q.05_peak_4892	-1.03832	3.02558	13.6286	0.000222771	0.0177881
wt_h3k27ac.q.05_peak_37677	wt_h3k27ac.q.05_peak_37677	0.670819	4.16004	13.6185	0.000223971	0.0178613
wt_h3k27ac.q.05_peak_25267	wt_h3k27ac.q.05_peak_25267	-1.08385	2.94105	13.6118	0.000224765	0.017902
wt_h3k27ac.q.05_peak_52588	wt_h3k27ac.q.05_peak_52588	-1.71564	1.89045	13.6093	0.000225065	0.0179033
wt_h3k27ac.q.05_peak_67377	wt_h3k27ac.q.05_peak_67377	-1.2683	2.54253	13.6019	0.000225961	0.0179519
wt_h3k27ac.q.05_peak_80557	wt_h3k27ac.q.05_peak_80557	-1.40361	2.31191	13.5941	0.000226897	0.0179612
wt_h3k27ac.q.05_peak_6870	wt_h3k27ac.q.05_peak_6870	-1.40361	2.31191	13.5941	0.000226897	0.0179612
wt_h3k27ac.q.05_peak_74222	wt_h3k27ac.q.05_peak_74222	-1.51251	2.14917	13.5938	0.000226932	0.0179612
wt_h3k27ac.q.05_peak_77988	wt_h3k27ac.q.05_peak_77988	0.552359	4.69059	13.5891	0.000227506	0.0179841
wt_h3k27ac.q.05_peak_58149	wt_h3k27ac.q.05_peak_58149	-0.532649	4.79041	13.5499	0.000232303	0.0183088
wt_h3k27ac.q.05_peak_30967	wt_h3k27ac.q.05_peak_30967	0.665649	4.43192	13.5492	0.000232396	0.0183088
wt_h3k27ac.q.05_peak_25294	wt_h3k27ac.q.05_peak_25294	-1.43439	2.33101	13.5484	0.000232485	0.0183088
wt_h3k27ac.q.05_peak_24364	wt_h3k27ac.q.05_peak_24364	-1.71564	1.89045	13.5387	0.000233697	0.0183562
wt_h3k27ac.q.05_peak_61864	wt_h3k27ac.q.05_peak_61864	-1.22225	2.62225	13.5325	0.000234473	0.0183562
wt_h3k27ac.q.05_peak_48732	wt_h3k27ac.q.05_peak_48732	0.306075	6.50753	13.5305	0.000234723	0.0183562
wt_h3k27ac.q.05_peak_80002	wt_h3k27ac.q.05_peak_80002	0.447327	5.42085	13.5284	0.000234982	0.0183562
wt_h3k27ac.q.05_peak_83049	wt_h3k27ac.q.05_peak_83049	-0.933688	3.28272	13.5264	0.000235231	0.0183562
wt_h3k27ac.q.05_peak_14857	wt_h3k27ac.q.05_peak_14857	-0.933688	3.28273	13.5264	0.000235231	0.0183562
wt_h3k27ac.q.05_peak_6155	wt_h3k27ac.q.05_peak_6155	0.557722	4.65687	13.523	0.000235656	0.0183562
wt_h3k27ac.q.05_peak_18716	wt_h3k27ac.q.05_peak_18716	-1.05929	3.00193	13.5213	0.000235872	0.0183562
wt_h3k27ac.q.05_peak_43673	wt_h3k27ac.q.05_peak_43673	0.654334	4.21766	13.5211	0.000235897	0.0183562
wt_h3k27ac.q.05_peak_9319	wt_h3k27ac.q.05_peak_9319	-0.743299	3.87746	13.5181	0.000236277	0.0183562
wt_h3k27ac.q.05_peak_81512	wt_h3k27ac.q.05_peak_81512	-0.743297	3.87744	13.518	0.000236287	0.0183562
wt_h3k27ac.q.05_peak_33654	wt_h3k27ac.q.05_peak_33654	-0.871538	3.4581	13.5102	0.000237271	0.0184099
wt_h3k27ac.q.05_peak_32188	wt_h3k27ac.q.05_peak_32188	0.984646	3.67565	13.5004	0.000238513	0.0184836
wt_h3k27ac.q.05_peak_66928	wt_h3k27ac.q.05_peak_66928	-0.72843	3.95344	13.4958	0.000239093	0.0184936
wt_h3k27ac.q.05_peak_47367	wt_h3k27ac.q.05_peak_47367	-1.11496	2.83796	13.4948	0.000239229	0.0184936
wt_h3k27ac.q.05_peak_54002	wt_h3k27ac.q.05_peak_54002	-0.937956	3.39594	13.4877	0.000240127	0.0185404
wt_h3k27ac.q.05_peak_38566	wt_h3k27ac.q.05_peak_38566	-1.1465	2.76957	13.4838	0.000240628	0.0185563
wt_h3k27ac.q.05_peak_51503	wt_h3k27ac.q.05_peak_51503	-1.72803	2.36848	13.4647	0.000243094	0.0187236
wt_h3k27ac.q.05_peak_37987	wt_h3k27ac.q.05_peak_37987	0.563354	4.62238	13.4595	0.000243774	0.0187393
wt_h3k27ac.q.05_peak_80939	wt_h3k27ac.q.05_peak_80939	-0.768272	3.78349	13.4585	0.000243893	0.0187393
wt_h3k27ac.q.05_peak_81061	wt_h3k27ac.q.05_peak_81061	0.859423	3.48407	13.4528	0.000244635	0.0187735
wt_h3k27ac.q.05_peak_2038	wt_h3k27ac.q.05_peak_2038	-0.831159	3.57494	13.4448	0.000245689	0.0188251
wt_h3k27ac.q.05_peak_49161	wt_h3k27ac.q.05_peak_49161	-0.782188	3.7341	13.4404	0.000246263	0.0188251
wt_h3k27ac.q.05_peak_79700	wt_h3k27ac.q.05_peak_79700	-1.45777	2.27292	13.4388	0.000246477	0.0188251
wt_h3k27ac.q.05_peak_29095	wt_h3k27ac.q.05_peak_29095	0.698654	4.03158	13.4386	0.0002465	0.0188251
wt_h3k27ac.q.05_peak_32086	wt_h3k27ac.q.05_peak_32086	-0.813481	3.62996	13.4323	0.000247327	0.0188654
wt_h3k27ac.q.05_peak_52498	wt_h3k27ac.q.05_peak_52498	-1.33684	2.40502	13.4205	0.000248885	0.0188931
wt_h3k27ac.q.05_peak_16608	wt_h3k27ac.q.05_peak_16608	-1.33684	2.40501	13.4205	0.000248887	0.0188931
wt_h3k27ac.q.05_peak_28459	wt_h3k27ac.q.05_peak_28459	-1.33684	2.40501	13.4205	0.000248889	0.0188931
wt_h3k27ac.q.05_peak_33384	wt_h3k27ac.q.05_peak_33384	-1.33684	2.405	13.4205	0.00024889	0.0188931
wt_h3k27ac.q.05_peak_44834	wt_h3k27ac.q.05_peak_44834	-0.799712	3.85785	13.418	0.000249224	0.0188958
wt_h3k27ac.q.05_peak_58573	wt_h3k27ac.q.05_peak_58573	-0.698857	4.03143	13.4082	0.000250529	0.01895
wt_h3k27ac.q.05_peak_56989	wt_h3k27ac.q.05_peak_56989	-0.698855	4.03141	13.4081	0.00025054	0.01895
wt_h3k27ac.q.05_peak_58477	wt_h3k27ac.q.05_peak_58477	-1.33684	2.40501	13.4028	0.000251251	0.018981
wt_h3k27ac.q.05_peak_38845	wt_h3k27ac.q.05_peak_38845	0.337185	6.06626	13.3758	0.000254886	0.0192326
wt_h3k27ac.q.05_peak_80849	wt_h3k27ac.q.05_peak_80849	1.04557	2.978	13.3729	0.000255281	0.0192336
wt_h3k27ac.q.05_peak_45719	wt_h3k27ac.q.05_peak_45719	0.625195	4.3264	13.3713	0.000255508	0.0192336
wt_h3k27ac.q.05_peak_59956	wt_h3k27ac.q.05_peak_59956	0.462282	5.16538	13.3677	0.000255994	0.0192378
wt_h3k27ac.q.05_peak_51104	wt_h3k27ac.q.05_peak_51104	-1.54507	2.08309	13.362	0.00025678	0.0192378
wt_h3k27ac.q.05_peak_64823	wt_h3k27ac.q.05_peak_64823	-1.54507	2.08307	13.3619	0.000256783	0.0192378
wt_h3k27ac.q.05_peak_48426	wt_h3k27ac.q.05_peak_48426	-1.54507	2.08307	13.3619	0.000256784	0.0192378
wt_h3k27ac.q.05_peak_20428	wt_h3k27ac.q.05_peak_20428	-0.684142	4.08301	13.3528	0.000258037	0.0193087
wt_h3k27ac.q.05_peak_7084	wt_h3k27ac.q.05_peak_7084	-0.74752	3.84458	13.3449	0.000259126	0.0193672
wt_h3k27ac.q.05_peak_16600	wt_h3k27ac.q.05_peak_16600	0.724271	4.3359	13.3336	0.000260695	0.0194494
wt_h3k27ac.q.05_peak_20769	wt_h3k27ac.q.05_peak_20769	-0.85955	3.47539	13.3259	0.000261762	0.0194494
wt_h3k27ac.q.05_peak_26513	wt_h3k27ac.q.05_peak_26513	-1.42554	2.25302	13.3259	0.000261763	0.0194494
wt_h3k27ac.q.05_peak_12229	wt_h3k27ac.q.05_peak_12229	-1.42554	2.253	13.3259	0.000261767	0.0194494
wt_h3k27ac.q.05_peak_43299	wt_h3k27ac.q.05_peak_43299	-1.42554	2.253	13.3259	0.000261768	0.0194494
wt_h3k27ac.q.05_peak_66858	wt_h3k27ac.q.05_peak_66858	-1.52629	2.45814	13.3224	0.00026225	0.0194624
wt_h3k27ac.q.05_peak_44261	wt_h3k27ac.q.05_peak_44261	-0.670516	4.13292	13.3092	0.00026411	0.0195731
wt_h3k27ac.q.05_peak_18173	wt_h3k27ac.q.05_peak_18173	-1.23765	2.68297	13.3074	0.000264364	0.0195731
wt_h3k27ac.q.05_peak_67126	wt_h3k27ac.q.05_peak_67126	-1.2802	2.49248	13.3004	0.00026535	0.0195835
wt_h3k27ac.q.05_peak_55873	wt_h3k27ac.q.05_peak_55873	-1.2802	2.49247	13.3004	0.000265352	0.0195835
wt_h3k27ac.q.05_peak_14907	wt_h3k27ac.q.05_peak_14907	0.702168	4.29755	13.2998	0.000265435	0.0195835
wt_h3k27ac.q.05_peak_43095	wt_h3k27ac.q.05_peak_43095	0.400066	5.56703	13.2926	0.000266452	0.0196294
wt_h3k27ac.q.05_peak_72642	wt_h3k27ac.q.05_peak_72642	0.387926	5.75564	13.291	0.000266679	0.0196294
wt_h3k27ac.q.05_peak_37240	wt_h3k27ac.q.05_peak_37240	0.240171	7.04619	13.2871	0.000267241	0.0196478
wt_h3k27ac.q.05_peak_41659	wt_h3k27ac.q.05_peak_41659	-0.787981	3.69775	13.2761	0.000268806	0.0197399
wt_h3k27ac.q.05_peak_36955	wt_h3k27ac.q.05_peak_36955	0.391019	5.63019	13.2727	0.000269297	0.0197529
wt_h3k27ac.q.05_peak_66705	wt_h3k27ac.q.05_peak_66705	-1.3889	2.72695	13.2685	0.000269898	0.019774
wt_h3k27ac.q.05_peak_41510	wt_h3k27ac.q.05_peak_41510	0.217595	7.33597	13.2606	0.000271046	0.0198351
wt_h3k27ac.q.05_peak_23665	wt_h3k27ac.q.05_peak_23665	0.398956	5.57109	13.2567	0.00027161	0.0198533
wt_h3k27ac.q.05_peak_1907	wt_h3k27ac.q.05_peak_1907	-1.87219	2.29254	13.2541	0.00027198	0.0198574
wt_h3k27ac.q.05_peak_41954	wt_h3k27ac.q.05_peak_41954	0.538168	4.72711	13.2493	0.000272688	0.019886
wt_h3k27ac.q.05_peak_12292	wt_h3k27ac.q.05_peak_12292	-0.508003	4.89039	13.2466	0.000273071	0.019891
wt_h3k27ac.q.05_peak_75845	wt_h3k27ac.q.05_peak_75845	0.457177	5.18129	13.2239	0.0002764	0.0200781
wt_h3k27ac.q.05_peak_46414	wt_h3k27ac.q.05_peak_46414	-1.2315	2.57494	13.2226	0.000276593	0.0200781
wt_h3k27ac.q.05_peak_42967	wt_h3k27ac.q.05_peak_42967	-1.2315	2.57493	13.2226	0.000276595	0.0200781
wt_h3k27ac.q.05_peak_15226	wt_h3k27ac.q.05_peak_15226	-0.573142	5.15972	13.201	0.000279794	0.020287
wt_h3k27ac.q.05_peak_22940	wt_h3k27ac.q.05_peak_22940	-1.0898	2.86444	13.1984	0.000280187	0.0202922
wt_h3k27ac.q.05_peak_64785	wt_h3k27ac.q.05_peak_64785	0.535425	4.73425	13.1837	0.000282392	0.0204284
wt_h3k27ac.q.05_peak_32410	wt_h3k27ac.q.05_peak_32410	-1.18917	2.65294	13.179	0.000283098	0.0204326
wt_h3k27ac.q.05_peak_53050	wt_h3k27ac.q.05_peak_53050	-1.18917	2.65294	13.179	0.000283098	0.0204326
wt_h3k27ac.q.05_peak_19623	wt_h3k27ac.q.05_peak_19623	-1.08122	2.97791	13.1678	0.000284797	0.0205318
wt_h3k27ac.q.05_peak_50781	wt_h3k27ac.q.05_peak_50781	-1.15201	2.72694	13.1635	0.000285458	0.0205559
wt_h3k27ac.q.05_peak_39030	wt_h3k27ac.q.05_peak_39030	-1.06138	2.96574	13.1593	0.000286094	0.0205782
wt_h3k27ac.q.05_peak_63605	wt_h3k27ac.q.05_peak_63605	0.585439	4.4841	13.1565	0.00028653	0.0205861
wt_h3k27ac.q.05_peak_12138	wt_h3k27ac.q.05_peak_12138	0.563869	4.99911	13.1477	0.000287879	0.0205966
wt_h3k27ac.q.05_peak_24972	wt_h3k27ac.q.05_peak_24972	-0.641047	4.23784	13.1473	0.000287941	0.0205966
wt_h3k27ac.q.05_peak_29261	wt_h3k27ac.q.05_peak_29261	0.604214	4.39611	13.1455	0.00028821	0.0205966
wt_h3k27ac.q.05_peak_40998	wt_h3k27ac.q.05_peak_40998	-1.58199	2.01382	13.1429	0.000288607	0.0205966
wt_h3k27ac.q.05_peak_46499	wt_h3k27ac.q.05_peak_46499	-1.35365	2.34989	13.1344	0.000289925	0.0205966
wt_h3k27ac.q.05_peak_4655	wt_h3k27ac.q.05_peak_4655	-1.35365	2.34988	13.1344	0.000289926	0.0205966
wt_h3k27ac.q.05_peak_71499	wt_h3k27ac.q.05_peak_71499	-1.35365	2.34988	13.1344	0.000289927	0.0205966
wt_h3k27ac.q.05_peak_19933	wt_h3k27ac.q.05_peak_19933	-1.35365	2.34987	13.1344	0.00028993	0.0205966
wt_h3k27ac.q.05_peak_40999	wt_h3k27ac.q.05_peak_40999	-1.35365	2.34986	13.1343	0.000289932	0.0205966
wt_h3k27ac.q.05_peak_10774	wt_h3k27ac.q.05_peak_10774	-0.682992	4.51341	13.1343	0.000289942	0.0205966
wt_h3k27ac.q.05_peak_22709	wt_h3k27ac.q.05_peak_22709	0.471006	5.08608	13.1198	0.000292189	0.0207131
wt_h3k27ac.q.05_peak_39184	wt_h3k27ac.q.05_peak_39184	0.837315	3.51782	13.1189	0.000292335	0.0207131
wt_h3k27ac.q.05_peak_32922	wt_h3k27ac.q.05_peak_32922	0.565603	4.57504	13.1174	0.000292566	0.0207131
wt_h3k27ac.q.05_peak_64713	wt_h3k27ac.q.05_peak_64713	-2.05885	1.99	13.1122	0.000293384	0.0207477
wt_h3k27ac.q.05_peak_39885	wt_h3k27ac.q.05_peak_39885	-0.821833	3.69778	13.1086	0.000293941	0.0207638
wt_h3k27ac.q.05_peak_15454	wt_h3k27ac.q.05_peak_15454	0.259919	6.79243	13.0971	0.000295754	0.0208609
wt_h3k27ac.q.05_peak_5495	wt_h3k27ac.q.05_peak_5495	-0.8263	3.63766	13.0957	0.000295976	0.0208609
wt_h3k27ac.q.05_peak_64924	wt_h3k27ac.q.05_peak_64924	-0.947121	3.20201	13.0853	0.000297629	0.0209539
wt_h3k27ac.q.05_peak_73544	wt_h3k27ac.q.05_peak_73544	-1.65716	2.06036	13.0752	0.000299229	0.0209915
wt_h3k27ac.q.05_peak_38237	wt_h3k27ac.q.05_peak_38237	-1.28287	2.60666	13.0661	0.000300692	0.0209915
wt_h3k27ac.q.05_peak_48104	wt_h3k27ac.q.05_peak_48104	-1.44993	2.19163	13.0645	0.000300939	0.0209915
wt_h3k27ac.q.05_peak_68871	wt_h3k27ac.q.05_peak_68871	-1.44993	2.19162	13.0645	0.00030094	0.0209915
wt_h3k27ac.q.05_peak_2283	wt_h3k27ac.q.05_peak_2283	-1.44993	2.19162	13.0645	0.000300941	0.0209915
wt_h3k27ac.q.05_peak_45693	wt_h3k27ac.q.05_peak_45693	-1.44993	2.19161	13.0645	0.000300943	0.0209915
wt_h3k27ac.q.05_peak_4702	wt_h3k27ac.q.05_peak_4702	-1.44993	2.19161	13.0645	0.000300947	0.0209915
wt_h3k27ac.q.05_peak_76748	wt_h3k27ac.q.05_peak_76748	-1.44993	2.19159	13.0645	0.00030095	0.0209915
wt_h3k27ac.q.05_peak_37444	wt_h3k27ac.q.05_peak_37444	-0.647424	4.20198	13.0632	0.000301157	0.0209915
wt_h3k27ac.q.05_peak_8896	wt_h3k27ac.q.05_peak_8896	0.445486	5.23558	13.0502	0.000303251	0.0210884
wt_h3k27ac.q.05_peak_2424	wt_h3k27ac.q.05_peak_2424	-0.563915	4.57887	13.0477	0.000303649	0.0210884
wt_h3k27ac.q.05_peak_16425	wt_h3k27ac.q.05_peak_16425	0.388254	5.80785	13.0467	0.000303827	0.0210884
wt_h3k27ac.q.05_peak_11688	wt_h3k27ac.q.05_peak_11688	0.630685	4.2681	13.0463	0.000303884	0.0210884
wt_h3k27ac.q.05_peak_69489	wt_h3k27ac.q.05_peak_69489	-1.01906	3.01382	13.0409	0.00030476	0.0211259
wt_h3k27ac.q.05_peak_36136	wt_h3k27ac.q.05_peak_36136	0.271956	6.65215	13.0299	0.000306554	0.0212269
wt_h3k27ac.q.05_peak_29607	wt_h3k27ac.q.05_peak_29607	0.443918	5.24064	13.0055	0.00031057	0.0214587
wt_h3k27ac.q.05_peak_62020	wt_h3k27ac.q.05_peak_62020	-0.756627	3.77656	13.0015	0.000311239	0.0214587
wt_h3k27ac.q.05_peak_25707	wt_h3k27ac.q.05_peak_25707	-0.857094	3.44938	13.0014	0.000311257	0.0214587
wt_h3k27ac.q.05_peak_70379	wt_h3k27ac.q.05_peak_70379	-1.29316	2.44063	13.0014	0.000311262	0.0214587
wt_h3k27ac.q.05_peak_34586	wt_h3k27ac.q.05_peak_34586	0.302466	6.33719	12.9818	0.000314525	0.0215696
wt_h3k27ac.q.05_peak_56223	wt_h3k27ac.q.05_peak_56223	-0.654151	4.16521	12.9817	0.000314544	0.0215696
wt_h3k27ac.q.05_peak_53572	wt_h3k27ac.q.05_peak_53572	0.454178	5.17338	12.9808	0.000314706	0.0215696
wt_h3k27ac.q.05_peak_64251	wt_h3k27ac.q.05_peak_64251	-0.963002	3.14917	12.9796	0.000314906	0.0215696
wt_h3k27ac.q.05_peak_58273	wt_h3k27ac.q.05_peak_58273	-0.963001	3.14917	12.9796	0.000314907	0.0215696
wt_h3k27ac.q.05_peak_43924	wt_h3k27ac.q.05_peak_43924	-0.962998	3.14914	12.9795	0.000314922	0.0215696
wt_h3k27ac.q.05_peak_20376	wt_h3k27ac.q.05_peak_20376	0.550489	4.63398	12.9684	0.000316796	0.0216744
wt_h3k27ac.q.05_peak_31183	wt_h3k27ac.q.05_peak_31183	-1.00412	3.83121	12.9534	0.000319339	0.0218247
wt_h3k27ac.q.05_peak_38465	wt_h3k27ac.q.05_peak_38465	0.712142	3.92869	12.9484	0.000320198	0.0218597
wt_h3k27ac.q.05_peak_52922	wt_h3k27ac.q.05_peak_52922	0.447313	5.21253	12.9462	0.000320577	0.021862
wt_h3k27ac.q.05_peak_7621	wt_h3k27ac.q.05_peak_7621	0.459272	5.15742	12.94	0.000321641	0.0219108
wt_h3k27ac.q.05_peak_24167	wt_h3k27ac.q.05_peak_24167	-0.905424	3.94098	12.9212	0.000324886	0.0220798
wt_h3k27ac.q.05_peak_63219	wt_h3k27ac.q.05_peak_63219	-1.06578	2.89042	12.9147	0.000326005	0.0220798
wt_h3k27ac.q.05_peak_37018	wt_h3k27ac.q.05_peak_37018	-1.24152	2.52603	12.9144	0.000326062	0.0220798
wt_h3k27ac.q.05_peak_59078	wt_h3k27ac.q.05_peak_59078	-1.24152	2.52603	12.9144	0.000326064	0.0220798
wt_h3k27ac.q.05_peak_55964	wt_h3k27ac.q.05_peak_55964	-1.24151	2.52601	12.9144	0.000326072	0.0220798
wt_h3k27ac.q.05_peak_29768	wt_h3k27ac.q.05_peak_29768	-0.890884	3.34046	12.9135	0.000326222	0.0220798
wt_h3k27ac.q.05_peak_57665	wt_h3k27ac.q.05_peak_57665	-0.950606	3.79727	12.9065	0.000327442	0.0221387
wt_h3k27ac.q.05_peak_59572	wt_h3k27ac.q.05_peak_59572	-2.32515	2.29255	12.9022	0.000328203	0.0221471
wt_h3k27ac.q.05_peak_31499	wt_h3k27ac.q.05_peak_31499	0.269215	6.66732	12.9018	0.000328269	0.0221471
wt_h3k27ac.q.05_peak_23733	wt_h3k27ac.q.05_peak_23733	-0.648871	4.17579	12.876	0.000332827	0.0223549
wt_h3k27ac.q.05_peak_12224	wt_h3k27ac.q.05_peak_12224	-1.09306	2.82455	12.8727	0.000333405	0.0223549
wt_h3k27ac.q.05_peak_58994	wt_h3k27ac.q.05_peak_58994	-0.682805	4.03726	12.8703	0.000333836	0.0223549
wt_h3k27ac.q.05_peak_42382	wt_h3k27ac.q.05_peak_42382	-0.931236	3.22262	12.8688	0.000334102	0.0223549
wt_h3k27ac.q.05_peak_69603	wt_h3k27ac.q.05_peak_69603	-0.931234	3.22261	12.8688	0.000334108	0.0223549
wt_h3k27ac.q.05_peak_78303	wt_h3k27ac.q.05_peak_78303	1.09641	2.81109	12.8681	0.000334228	0.0223549
wt_h3k27ac.q.05_peak_54731	wt_h3k27ac.q.05_peak_54731	1.09641	2.8111	12.8681	0.000334233	0.0223549
wt_h3k27ac.q.05_peak_12568	wt_h3k27ac.q.05_peak_12568	-1.19688	2.60663	12.8641	0.000334945	0.0223549
wt_h3k27ac.q.05_peak_26685	wt_h3k27ac.q.05_peak_26685	-0.355274	5.86111	12.8625	0.000335237	0.0223549
wt_h3k27ac.q.05_peak_24662	wt_h3k27ac.q.05_peak_24662	-0.748473	3.7904	12.8612	0.000335457	0.0223549
wt_h3k27ac.q.05_peak_78427	wt_h3k27ac.q.05_peak_78427	-0.866938	3.405	12.8595	0.000335761	0.0223549
wt_h3k27ac.q.05_peak_42159	wt_h3k27ac.q.05_peak_42159	-2.36802	1.91599	12.858	0.000336032	0.0223549
wt_h3k27ac.q.05_peak_20739	wt_h3k27ac.q.05_peak_20739	-0.499284	4.98383	12.8572	0.00033618	0.0223549
wt_h3k27ac.q.05_peak_23990	wt_h3k27ac.q.05_peak_23990	0.444121	5.22283	12.8561	0.000336373	0.0223549
wt_h3k27ac.q.05_peak_31400	wt_h3k27ac.q.05_peak_31400	-1.37216	2.29255	12.8526	0.000337013	0.0223549
wt_h3k27ac.q.05_peak_12279	wt_h3k27ac.q.05_peak_12279	-1.37216	2.29253	12.8526	0.000337019	0.0223549
wt_h3k27ac.q.05_peak_43406	wt_h3k27ac.q.05_peak_43406	-1.1579	2.68299	12.8438	0.000338607	0.0224153
wt_h3k27ac.q.05_peak_16807	wt_h3k27ac.q.05_peak_16807	0.924749	3.23293	12.8436	0.000338641	0.0224153
wt_h3k27ac.q.05_peak_67720	wt_h3k27ac.q.05_peak_67720	0.631283	4.2431	12.8385	0.000339556	0.0224523
wt_h3k27ac.q.05_peak_50798	wt_h3k27ac.q.05_peak_50798	0.387988	6.22921	12.8359	0.000340039	0.0224607
wt_h3k27ac.q.05_peak_76486	wt_h3k27ac.q.05_peak_76486	0.478807	5.00804	12.8297	0.000341161	0.0225113
wt_h3k27ac.q.05_peak_43929	wt_h3k27ac.q.05_peak_43929	0.472247	5.04613	12.8236	0.000342272	0.022561
wt_h3k27ac.q.05_peak_51047	wt_h3k27ac.q.05_peak_51047	-0.402923	5.49664	12.8175	0.000343383	0.0225972
wt_h3k27ac.q.05_peak_3811	wt_h3k27ac.q.05_peak_3811	-1.47722	2.12749	12.8111	0.00034456	0.0225972
wt_h3k27ac.q.05_peak_74267	wt_h3k27ac.q.05_peak_74267	-1.47721	2.12749	12.8111	0.000344561	0.0225972
wt_h3k27ac.q.05_peak_33386	wt_h3k27ac.q.05_peak_33386	-1.47721	2.12749	12.8111	0.000344563	0.0225972
wt_h3k27ac.q.05_peak_51258	wt_h3k27ac.q.05_peak_51258	0.416674	5.39845	12.8109	0.000344612	0.0225972
wt_h3k27ac.q.05_peak_70167	wt_h3k27ac.q.05_peak_70167	-0.530615	4.71967	12.7925	0.000348021	0.0227528
wt_h3k27ac.q.05_peak_13759	wt_h3k27ac.q.05_peak_13759	-0.53061	4.71962	12.7922	0.000348061	0.0227528
wt_h3k27ac.q.05_peak_62731	wt_h3k27ac.q.05_peak_62731	-0.999194	3.03726	12.7916	0.000348182	0.0227528
wt_h3k27ac.q.05_peak_69087	wt_h3k27ac.q.05_peak_69087	0.732007	3.83808	12.7903	0.000348428	0.0227528
wt_h3k27ac.q.05_peak_62626	wt_h3k27ac.q.05_peak_62626	-0.902907	3.2925	12.7839	0.000349609	0.0227862
wt_h3k27ac.q.05_peak_69145	wt_h3k27ac.q.05_peak_69145	-1.98398	2.06038	12.7836	0.000349662	0.0227862
wt_h3k27ac.q.05_peak_9853	wt_h3k27ac.q.05_peak_9853	1.23975	2.50944	12.7744	0.000351391	0.0228752
wt_h3k27ac.q.05_peak_63356	wt_h3k27ac.q.05_peak_63356	-0.946167	3.17054	12.7561	0.000354854	0.0230628
wt_h3k27ac.q.05_peak_76799	wt_h3k27ac.q.05_peak_76799	-0.676747	4.0488	12.7553	0.000355003	0.0230628
wt_h3k27ac.q.05_peak_68679	wt_h3k27ac.q.05_peak_68679	-2.09521	2.01384	12.7501	0.000355984	0.0231027
wt_h3k27ac.q.05_peak_48561	wt_h3k27ac.q.05_peak_48561	-0.508255	4.83453	12.7479	0.000356416	0.023107
wt_h3k27ac.q.05_peak_9294	wt_h3k27ac.q.05_peak_9294	0.516975	4.78366	12.7415	0.000357624	0.0231615
wt_h3k27ac.q.05_peak_12257	wt_h3k27ac.q.05_peak_12257	-1.61618	2.12746	12.7281	0.000360204	0.0233046
wt_h3k27ac.q.05_peak_23218	wt_h3k27ac.q.05_peak_23218	-0.740499	3.80417	12.7241	0.000360974	0.0233305
wt_h3k27ac.q.05_peak_71945	wt_h3k27ac.q.05_peak_71945	0.388147	5.8728	12.7186	0.000362038	0.0233754
wt_h3k27ac.q.05_peak_34759	wt_h3k27ac.q.05_peak_34759	-1.01995	2.9779	12.7117	0.000363371	0.0234374
wt_h3k27ac.q.05_peak_60393	wt_h3k27ac.q.05_peak_60393	-1.30733	2.38688	12.7053	0.000364623	0.0234471
wt_h3k27ac.q.05_peak_80028	wt_h3k27ac.q.05_peak_80028	-1.30732	2.38685	12.7052	0.000364635	0.0234471
wt_h3k27ac.q.05_peak_44136	wt_h3k27ac.q.05_peak_44136	-1.30732	2.38685	12.7052	0.000364637	0.0234471
wt_h3k27ac.q.05_peak_7948	wt_h3k27ac.q.05_peak_7948	-1.4611	2.60663	12.6989	0.000365865	0.0235022
wt_h3k27ac.q.05_peak_3771	wt_h3k27ac.q.05_peak_3771	-1.64626	2.66799	12.6946	0.000366719	0.0235215
wt_h3k27ac.q.05_peak_40854	wt_h3k27ac.q.05_peak_40854	-0.903097	3.52598	12.6936	0.000366911	0.0235215
wt_h3k27ac.q.05_peak_76934	wt_h3k27ac.q.05_peak_76934	0.790697	3.62234	12.6865	0.00036831	0.0235838
wt_h3k27ac.q.05_peak_32756	wt_h3k27ac.q.05_peak_32756	-1.47048	2.42292	12.6848	0.000368632	0.0235838
wt_h3k27ac.q.05_peak_62	wt_h3k27ac.q.05_peak_62	0.454888	5.13582	12.6828	0.000369044	0.0235863
wt_h3k27ac.q.05_peak_50939	wt_h3k27ac.q.05_peak_50939	0.437879	5.24313	12.6803	0.00036952	0.0235928
wt_h3k27ac.q.05_peak_52051	wt_h3k27ac.q.05_peak_52051	-0.854544	3.42292	12.6771	0.000370157	0.0236096
wt_h3k27ac.q.05_peak_33842	wt_h3k27ac.q.05_peak_33842	-0.791016	3.71965	12.6703	0.000371512	0.023672
wt_h3k27ac.q.05_peak_60	wt_h3k27ac.q.05_peak_60	-1.18205	2.6978	12.6628	0.000373008	0.0237434
wt_h3k27ac.q.05_peak_25737	wt_h3k27ac.q.05_peak_25737	-1.23156	2.57494	12.646	0.000376369	0.0238997
wt_h3k27ac.q.05_peak_20901	wt_h3k27ac.q.05_peak_20901	0.628623	4.53029	12.6445	0.000376664	0.0238997
wt_h3k27ac.q.05_peak_5584	wt_h3k27ac.q.05_peak_5584	-1.04284	2.91597	12.643	0.000376969	0.0238997
wt_h3k27ac.q.05_peak_35782	wt_h3k27ac.q.05_peak_35782	0.611468	4.80435	12.643	0.000376979	0.0238997
wt_h3k27ac.q.05_peak_66631	wt_h3k27ac.q.05_peak_66631	-1.35181	2.75546	12.6365	0.000378279	0.0239291
wt_h3k27ac.q.05_peak_39384	wt_h3k27ac.q.05_peak_39384	-0.814756	3.54251	12.6355	0.00037849	0.0239291
wt_h3k27ac.q.05_peak_74526	wt_h3k27ac.q.05_peak_74526	0.339452	5.96437	12.635	0.000378581	0.0239291
wt_h3k27ac.q.05_peak_1980	wt_h3k27ac.q.05_peak_1980	-0.553678	4.58289	12.6228	0.000381079	0.0240629
wt_h3k27ac.q.05_peak_55389	wt_h3k27ac.q.05_peak_55389	0.588631	4.40966	12.6107	0.000383541	0.0240835
wt_h3k27ac.q.05_peak_55876	wt_h3k27ac.q.05_peak_55876	-0.564865	4.74837	12.6102	0.000383658	0.0240835
wt_h3k27ac.q.05_peak_48148	wt_h3k27ac.q.05_peak_48148	-1.25239	2.47541	12.608	0.000384094	0.0240835
wt_h3k27ac.q.05_peak_8224	wt_h3k27ac.q.05_peak_8224	-1.25239	2.47539	12.608	0.0003841	0.0240835
wt_h3k27ac.q.05_peak_58384	wt_h3k27ac.q.05_peak_58384	-1.25239	2.47539	12.608	0.000384101	0.0240835
wt_h3k27ac.q.05_peak_81939	wt_h3k27ac.q.05_peak_81939	-1.25239	2.47539	12.608	0.000384102	0.0240835
wt_h3k27ac.q.05_peak_47351	wt_h3k27ac.q.05_peak_47351	0.841904	3.4495	12.6063	0.000384442	0.0240835
wt_h3k27ac.q.05_peak_41125	wt_h3k27ac.q.05_peak_41125	0.841901	3.44954	12.6062	0.000384459	0.0240835
wt_h3k27ac.q.05_peak_77015	wt_h3k27ac.q.05_peak_77015	-1.24147	2.52601	12.5979	0.000386189	0.0241679
wt_h3k27ac.q.05_peak_70990	wt_h3k27ac.q.05_peak_70990	-1.06822	2.85125	12.5875	0.000388343	0.0242282
wt_h3k27ac.q.05_peak_80198	wt_h3k27ac.q.05_peak_80198	-1.06822	2.85123	12.5874	0.000388352	0.0242282
wt_h3k27ac.q.05_peak_27240	wt_h3k27ac.q.05_peak_27240	-0.888826	3.3119	12.5867	0.000388505	0.0242282
wt_h3k27ac.q.05_peak_63125	wt_h3k27ac.q.05_peak_63125	-1.03965	2.98993	12.5853	0.000388786	0.0242282
wt_h3k27ac.q.05_peak_64261	wt_h3k27ac.q.05_peak_64261	0.413922	5.39163	12.5839	0.000389074	0.0242282
wt_h3k27ac.q.05_peak_73103	wt_h3k27ac.q.05_peak_73103	-1.39266	2.23284	12.5759	0.000390756	0.0242312
wt_h3k27ac.q.05_peak_75445	wt_h3k27ac.q.05_peak_75445	-1.39266	2.23284	12.5759	0.000390757	0.0242312
wt_h3k27ac.q.05_peak_19834	wt_h3k27ac.q.05_peak_19834	-1.39266	2.23283	12.5759	0.000390762	0.0242312
wt_h3k27ac.q.05_peak_67572	wt_h3k27ac.q.05_peak_67572	-1.39266	2.23282	12.5758	0.000390765	0.0242312
wt_h3k27ac.q.05_peak_27992	wt_h3k27ac.q.05_peak_27992	0.469029	5.03748	12.5745	0.000391043	0.0242312
wt_h3k27ac.q.05_peak_38004	wt_h3k27ac.q.05_peak_38004	0.176935	7.87729	12.5722	0.000391527	0.0242374
wt_h3k27ac.q.05_peak_80643	wt_h3k27ac.q.05_peak_80643	-1.50796	2.06038	12.5673	0.000392555	0.0242772
wt_h3k27ac.q.05_peak_18670	wt_h3k27ac.q.05_peak_18670	-1.20521	2.55883	12.5504	0.000396116	0.0244734
wt_h3k27ac.q.05_peak_82331	wt_h3k27ac.q.05_peak_82331	-1.09653	2.78352	12.5473	0.000396785	0.0244908
wt_h3k27ac.q.05_peak_19818	wt_h3k27ac.q.05_peak_19818	-0.929922	3.1916	12.54	0.000398329	0.0245621
wt_h3k27ac.q.05_peak_72047	wt_h3k27ac.q.05_peak_72047	-1.12831	2.71245	12.5252	0.000401494	0.0247095
wt_h3k27ac.q.05_peak_30766	wt_h3k27ac.q.05_peak_30766	-1.12831	2.71243	12.5252	0.000401504	0.0247095
wt_h3k27ac.q.05_peak_36089	wt_h3k27ac.q.05_peak_36089	-1.2426	2.78348	12.5221	0.000402162	0.0247174
wt_h3k27ac.q.05_peak_64795	wt_h3k27ac.q.05_peak_64795	0.329939	6.03307	12.5209	0.000402416	0.0247174
wt_h3k27ac.q.05_peak_20506	wt_h3k27ac.q.05_peak_20506	0.401856	5.467	12.5078	0.000405246	0.0248393
wt_h3k27ac.q.05_peak_48306	wt_h3k27ac.q.05_peak_48306	-0.71407	3.87748	12.5076	0.0004053	0.0248393
wt_h3k27ac.q.05_peak_5678	wt_h3k27ac.q.05_peak_5678	0.938212	3.69054	12.5063	0.000405581	0.0248393
wt_h3k27ac.q.05_peak_6311	wt_h3k27ac.q.05_peak_6311	0.672823	4.03155	12.4885	0.000409468	0.025053
wt_h3k27ac.q.05_peak_49240	wt_h3k27ac.q.05_peak_49240	-1.35372	2.34988	12.4776	0.000411869	0.0251556
wt_h3k27ac.q.05_peak_74878	wt_h3k27ac.q.05_peak_74878	-0.598971	4.3498	12.4744	0.000412576	0.0251556
wt_h3k27ac.q.05_peak_66175	wt_h3k27ac.q.05_peak_66175	-0.804284	3.55879	12.4736	0.000412735	0.0251556
wt_h3k27ac.q.05_peak_79863	wt_h3k27ac.q.05_peak_79863	-0.83808	4.39583	12.4713	0.000413243	0.0251556
wt_h3k27ac.q.05_peak_51676	wt_h3k27ac.q.05_peak_51676	0.72794	3.81792	12.4687	0.000413819	0.0251556
wt_h3k27ac.q.05_peak_11230	wt_h3k27ac.q.05_peak_11230	-0.90039	3.68292	12.4668	0.000414258	0.0251556
wt_h3k27ac.q.05_peak_50440	wt_h3k27ac.q.05_peak_50440	0.81281	3.52613	12.4667	0.000414268	0.0251556
wt_h3k27ac.q.05_peak_66416	wt_h3k27ac.q.05_peak_66416	-0.608209	4.30702	12.4664	0.000414334	0.0251556
wt_h3k27ac.q.05_peak_2606	wt_h3k27ac.q.05_peak_2606	-0.999529	3.00196	12.4621	0.000415302	0.0251668
wt_h3k27ac.q.05_peak_65979	wt_h3k27ac.q.05_peak_65979	-0.999526	3.00193	12.462	0.000415317	0.0251668
wt_h3k27ac.q.05_peak_1628	wt_h3k27ac.q.05_peak_1628	0.759151	3.70526	12.4597	0.000415826	0.0251734
wt_h3k27ac.q.05_peak_71064	wt_h3k27ac.q.05_peak_71064	-0.725045	3.83124	12.4579	0.000416224	0.0251734
wt_h3k27ac.q.05_peak_29038	wt_h3k27ac.q.05_peak_29038	-1.42955	2.52601	12.4559	0.00041667	0.0251762
wt_h3k27ac.q.05_peak_44052	wt_h3k27ac.q.05_peak_44052	0.451779	5.12764	12.4404	0.000420135	0.0253613
wt_h3k27ac.q.05_peak_24320	wt_h3k27ac.q.05_peak_24320	0.941517	3.24306	12.4254	0.000423531	0.0255418
wt_h3k27ac.q.05_peak_11544	wt_h3k27ac.q.05_peak_11544	-1.16907	2.7835	12.417	0.000425434	0.025573
wt_h3k27ac.q.05_peak_3098	wt_h3k27ac.q.05_peak_3098	0.551618	4.56706	12.4169	0.000425476	0.025573
wt_h3k27ac.q.05_peak_60388	wt_h3k27ac.q.05_peak_60388	-1.32287	2.33103	12.4124	0.000426499	0.025573
wt_h3k27ac.q.05_peak_34557	wt_h3k27ac.q.05_peak_34557	-1.32287	2.33102	12.4124	0.0004265	0.025573
wt_h3k27ac.q.05_peak_27907	wt_h3k27ac.q.05_peak_27907	-1.32287	2.33101	12.4124	0.000426502	0.025573
wt_h3k27ac.q.05_peak_49871	wt_h3k27ac.q.05_peak_49871	-1.32287	2.331	12.4123	0.000426511	0.025573
wt_h3k27ac.q.05_peak_13672	wt_h3k27ac.q.05_peak_13672	-0.382984	5.59477	12.4107	0.000426886	0.025573
wt_h3k27ac.q.05_peak_67857	wt_h3k27ac.q.05_peak_67857	0.295956	6.33357	12.4017	0.000428941	0.0256718
wt_h3k27ac.q.05_peak_29142	wt_h3k27ac.q.05_peak_29142	-1.64068	2.31188	12.3933	0.000430876	0.0257631
wt_h3k27ac.q.05_peak_45792	wt_h3k27ac.q.05_peak_45792	-0.681363	3.98993	12.3874	0.000432236	0.02582
wt_h3k27ac.q.05_peak_19538	wt_h3k27ac.q.05_peak_19538	-1.12348	2.75548	12.3627	0.000437989	0.0261388
wt_h3k27ac.q.05_peak_1463	wt_h3k27ac.q.05_peak_1463	0.596319	4.34531	12.3551	0.000439791	0.0262216
wt_h3k27ac.q.05_peak_23245	wt_h3k27ac.q.05_peak_23245	-1.16205	2.98992	12.3497	0.000441056	0.0262455
wt_h3k27ac.q.05_peak_28829	wt_h3k27ac.q.05_peak_28829	-0.763189	3.68298	12.3482	0.000441403	0.0262455
wt_h3k27ac.q.05_peak_6991	wt_h3k27ac.q.05_peak_6991	-0.763184	3.68294	12.3481	0.00044144	0.0262455
wt_h3k27ac.q.05_peak_9341	wt_h3k27ac.q.05_peak_9341	-1.00352	3.90958	12.3437	0.000442466	0.0262817
wt_h3k27ac.q.05_peak_61545	wt_h3k27ac.q.05_peak_61545	-1.54287	1.98998	12.3349	0.000444571	0.0263296
wt_h3k27ac.q.05_peak_73992	wt_h3k27ac.q.05_peak_73992	-1.54287	1.98998	12.3349	0.000444571	0.0263296
wt_h3k27ac.q.05_peak_80085	wt_h3k27ac.q.05_peak_80085	-1.54287	1.98997	12.3349	0.000444576	0.0263296
wt_h3k27ac.q.05_peak_75399	wt_h3k27ac.q.05_peak_75399	-0.914238	3.21236	12.3311	0.000445471	0.0263296
wt_h3k27ac.q.05_peak_9265	wt_h3k27ac.q.05_peak_9265	-0.914236	3.21234	12.3311	0.000445485	0.0263296
wt_h3k27ac.q.05_peak_7756	wt_h3k27ac.q.05_peak_7756	-1.89186	2.21232	12.3298	0.000445776	0.0263296
wt_h3k27ac.q.05_peak_54910	wt_h3k27ac.q.05_peak_54910	-0.830803	3.45811	12.3271	0.000446431	0.0263436
wt_h3k27ac.q.05_peak_44750	wt_h3k27ac.q.05_peak_44750	-0.961766	3.08307	12.3204	0.000448031	0.0264006
wt_h3k27ac.q.05_peak_39493	wt_h3k27ac.q.05_peak_39493	-0.55657	4.53427	12.3196	0.000448233	0.0264006
wt_h3k27ac.q.05_peak_73003	wt_h3k27ac.q.05_peak_73003	-1.04453	2.87748	12.3146	0.000449438	0.0264227
wt_h3k27ac.q.05_peak_30912	wt_h3k27ac.q.05_peak_30912	-0.511193	4.76949	12.3145	0.000449448	0.0264227
wt_h3k27ac.q.05_peak_3945	wt_h3k27ac.q.05_peak_3945	-1.41548	2.17055	12.3051	0.000451717	0.0264292
wt_h3k27ac.q.05_peak_78610	wt_h3k27ac.q.05_peak_78610	-1.41548	2.17055	12.3051	0.000451717	0.0264292
wt_h3k27ac.q.05_peak_58323	wt_h3k27ac.q.05_peak_58323	-1.41547	2.17056	12.3051	0.000451718	0.0264292
wt_h3k27ac.q.05_peak_76656	wt_h3k27ac.q.05_peak_76656	-0.778945	3.98386	12.3048	0.000451805	0.0264292
wt_h3k27ac.q.05_peak_30914	wt_h3k27ac.q.05_peak_30914	-1.26423	2.42293	12.3037	0.000452062	0.0264292
wt_h3k27ac.q.05_peak_57593	wt_h3k27ac.q.05_peak_57593	-1.26423	2.42292	12.3037	0.000452071	0.0264292
wt_h3k27ac.q.05_peak_56116	wt_h3k27ac.q.05_peak_56116	-0.590594	4.36845	12.2976	0.00045355	0.0264911
wt_h3k27ac.q.05_peak_41173	wt_h3k27ac.q.05_peak_41173	0.661935	4.33593	12.2836	0.000456945	0.0266487
wt_h3k27ac.q.05_peak_41648	wt_h3k27ac.q.05_peak_41648	-0.728944	3.7973	12.2813	0.000457531	0.0266487
wt_h3k27ac.q.05_peak_2221	wt_h3k27ac.q.05_peak_2221	-0.629654	4.19158	12.2808	0.000457652	0.0266487
wt_h3k27ac.q.05_peak_43674	wt_h3k27ac.q.05_peak_43674	0.554184	4.53857	12.2796	0.000457938	0.0266487
wt_h3k27ac.q.05_peak_36805	wt_h3k27ac.q.05_peak_36805	-1.39262	2.23282	12.2698	0.000460341	0.0267638
wt_h3k27ac.q.05_peak_12685	wt_h3k27ac.q.05_peak_12685	0.955195	3.80429	12.2673	0.000460972	0.0267758
wt_h3k27ac.q.05_peak_46806	wt_h3k27ac.q.05_peak_46806	-0.886676	3.28273	12.2599	0.000462803	0.0268116
wt_h3k27ac.q.05_peak_70532	wt_h3k27ac.q.05_peak_70532	-0.699966	3.90325	12.2595	0.000462898	0.0268116
wt_h3k27ac.q.05_peak_18750	wt_h3k27ac.q.05_peak_18750	0.444987	5.14932	12.2585	0.000463146	0.0268116
wt_h3k27ac.q.05_peak_45673	wt_h3k27ac.q.05_peak_45673	-0.961764	3.08307	12.2579	0.000463288	0.0268116
wt_h3k27ac.q.05_peak_70206	wt_h3k27ac.q.05_peak_70206	-1.21423	2.50933	12.238	0.000468271	0.0270752
wt_h3k27ac.q.05_peak_51264	wt_h3k27ac.q.05_peak_51264	0.345858	6.04177	12.236	0.000468758	0.0270785
wt_h3k27ac.q.05_peak_20099	wt_h3k27ac.q.05_peak_20099	0.71348	3.84477	12.2286	0.000470617	0.027161
wt_h3k27ac.q.05_peak_20442	wt_h3k27ac.q.05_peak_20442	-0.314336	6.1396	12.2238	0.000471846	0.0271851
wt_h3k27ac.q.05_peak_65801	wt_h3k27ac.q.05_peak_65801	-0.979928	3.0256	12.2219	0.000472314	0.0271851
wt_h3k27ac.q.05_peak_58281	wt_h3k27ac.q.05_peak_58281	-0.979926	3.02556	12.2219	0.000472328	0.0271851
wt_h3k27ac.q.05_peak_8649	wt_h3k27ac.q.05_peak_8649	0.318733	6.0973	12.2185	0.000473178	0.0272093
wt_h3k27ac.q.05_peak_36723	wt_h3k27ac.q.05_peak_36723	0.279358	6.47882	12.2116	0.000474924	0.0272438
wt_h3k27ac.q.05_peak_53101	wt_h3k27ac.q.05_peak_53101	-0.928543	3.15987	12.2112	0.000475044	0.0272438
wt_h3k27ac.q.05_peak_43764	wt_h3k27ac.q.05_peak_43764	-0.58649	4.37765	12.2109	0.000475118	0.0272438
wt_h3k27ac.q.05_peak_2760	wt_h3k27ac.q.05_peak_2760	-0.861952	3.34983	12.2093	0.000475506	0.0272438
wt_h3k27ac.q.05_peak_31957	wt_h3k27ac.q.05_peak_31957	-0.754381	3.69776	12.2056	0.000476451	0.0272731
wt_h3k27ac.q.05_peak_38030	wt_h3k27ac.q.05_peak_38030	-1.1334	2.66803	12.2029	0.000477161	0.027289
wt_h3k27ac.q.05_peak_76425	wt_h3k27ac.q.05_peak_76425	-0.635929	4.15448	12.192	0.000479941	0.0274231
wt_h3k27ac.q.05_peak_29816	wt_h3k27ac.q.05_peak_29816	-0.901523	3.86443	12.1871	0.000481222	0.0274232
wt_h3k27ac.q.05_peak_48462	wt_h3k27ac.q.05_peak_48462	0.479874	4.92874	12.1867	0.000481326	0.0274232
wt_h3k27ac.q.05_peak_4374	wt_h3k27ac.q.05_peak_4374	-1.1334	2.66806	12.1865	0.000481366	0.0274232
wt_h3k27ac.q.05_peak_51464	wt_h3k27ac.q.05_peak_51464	-1.42537	2.69775	12.1853	0.000481681	0.0274232
wt_h3k27ac.q.05_peak_60538	wt_h3k27ac.q.05_peak_60538	-0.768655	3.64531	12.1794	0.000483209	0.0274854
wt_h3k27ac.q.05_peak_1254	wt_h3k27ac.q.05_peak_1254	0.225292	7.1057	12.175	0.000484342	0.027525
wt_h3k27ac.q.05_peak_43075	wt_h3k27ac.q.05_peak_43075	0.577079	4.41414	12.1688	0.000485952	0.0275917
wt_h3k27ac.q.05_peak_76873	wt_h3k27ac.q.05_peak_76873	-0.249691	6.80238	12.1629	0.000487502	0.0276548
wt_h3k27ac.q.05_peak_6693	wt_h3k27ac.q.05_peak_6693	-0.402964	5.42062	12.1588	0.000488576	0.0276908
wt_h3k27ac.q.05_peak_26639	wt_h3k27ac.q.05_peak_26639	-0.800996	3.53425	12.1547	0.000489641	0.0277263
wt_h3k27ac.q.05_peak_10463	wt_h3k27ac.q.05_peak_10463	-1.19356	2.92859	12.152	0.000490344	0.0277411
wt_h3k27ac.q.05_peak_16183	wt_h3k27ac.q.05_peak_16183	-0.574474	4.42732	12.1484	0.000491306	0.0277471
wt_h3k27ac.q.05_peak_73602	wt_h3k27ac.q.05_peak_73602	-0.589954	4.41392	12.1483	0.000491329	0.0277471
wt_h3k27ac.q.05_peak_10516	wt_h3k27ac.q.05_peak_10516	0.54774	4.55491	12.1408	0.000493319	0.027814
wt_h3k27ac.q.05_peak_45222	wt_h3k27ac.q.05_peak_45222	0.700786	4.0021	12.1405	0.000493395	0.027814
wt_h3k27ac.q.05_peak_7647	wt_h3k27ac.q.05_peak_7647	-0.999879	2.96574	12.1324	0.000495521	0.0278641
wt_h3k27ac.q.05_peak_68646	wt_h3k27ac.q.05_peak_68646	0.80913	3.50103	12.1321	0.000495608	0.0278641
wt_h3k27ac.q.05_peak_78455	wt_h3k27ac.q.05_peak_78455	-0.540281	4.59475	12.1321	0.00049561	0.0278641
wt_h3k27ac.q.05_peak_51221	wt_h3k27ac.q.05_peak_51221	-1.58286	1.91599	12.1164	0.000499803	0.028073
wt_h3k27ac.q.05_peak_60271	wt_h3k27ac.q.05_peak_60271	0.8933	3.24305	12.1149	0.000500214	0.028073
wt_h3k27ac.q.05_peak_18417	wt_h3k27ac.q.05_peak_18417	-0.94411	3.10546	12.0975	0.000504882	0.0283097
wt_h3k27ac.q.05_peak_76917	wt_h3k27ac.q.05_peak_76917	-1.19679	2.60662	12.0912	0.000506602	0.028381
wt_h3k27ac.q.05_peak_17301	wt_h3k27ac.q.05_peak_17301	0.500623	4.99917	12.0799	0.000509679	0.0285248
wt_h3k27ac.q.05_peak_46865	wt_h3k27ac.q.05_peak_46865	-0.432282	5.21229	12.0785	0.000510073	0.0285248
wt_h3k27ac.q.05_peak_73608	wt_h3k27ac.q.05_peak_73608	-0.872771	3.30223	12.0693	0.000512581	0.0285992
wt_h3k27ac.q.05_peak_77942	wt_h3k27ac.q.05_peak_77942	-0.872771	3.30221	12.0693	0.000512585	0.0285992
wt_h3k27ac.q.05_peak_20326	wt_h3k27ac.q.05_peak_20326	-0.481779	4.90641	12.0687	0.000512765	0.0285992
wt_h3k27ac.q.05_peak_60779	wt_h3k27ac.q.05_peak_60779	-1.57995	2.42295	12.0662	0.000513438	0.0286115
wt_h3k27ac.q.05_peak_80984	wt_h3k27ac.q.05_peak_80984	0.333163	5.95052	12.0584	0.000515595	0.0286848
wt_h3k27ac.q.05_peak_21726	wt_h3k27ac.q.05_peak_21726	-1.0219	2.90327	12.0533	0.000517008	0.0286848
wt_h3k27ac.q.05_peak_28153	wt_h3k27ac.q.05_peak_28153	-1.0219	2.90327	12.0533	0.000517011	0.0286848
wt_h3k27ac.q.05_peak_19051	wt_h3k27ac.q.05_peak_19051	-1.0219	2.90326	12.0533	0.000517017	0.0286848
wt_h3k27ac.q.05_peak_37942	wt_h3k27ac.q.05_peak_37942	-1.02189	2.90324	12.0532	0.000517027	0.0286848
wt_h3k27ac.q.05_peak_64809	wt_h3k27ac.q.05_peak_64809	-1.44103	2.10546	12.0414	0.000520325	0.0288424
wt_h3k27ac.q.05_peak_53428	wt_h3k27ac.q.05_peak_53428	-1.06818	2.85125	12.0325	0.000522802	0.0289542
wt_h3k27ac.q.05_peak_22162	wt_h3k27ac.q.05_peak_22162	0.399769	5.42532	12.0255	0.000524782	0.0290384
wt_h3k27ac.q.05_peak_18295	wt_h3k27ac.q.05_peak_18295	0.233513	8.64778	12.0108	0.000528928	0.0292288
wt_h3k27ac.q.05_peak_60317	wt_h3k27ac.q.05_peak_60317	-1.24342	3.00189	12.01	0.000529149	0.0292288
wt_h3k27ac.q.05_peak_48976	wt_h3k27ac.q.05_peak_48976	-0.827761	3.43177	12.0051	0.000530545	0.0292308
wt_h3k27ac.q.05_peak_14791	wt_h3k27ac.q.05_peak_14791	-1.27719	2.3685	12.0018	0.000531495	0.0292308
wt_h3k27ac.q.05_peak_2854	wt_h3k27ac.q.05_peak_2854	-1.27719	2.3685	12.0018	0.000531498	0.0292308
wt_h3k27ac.q.05_peak_36593	wt_h3k27ac.q.05_peak_36593	-1.27719	2.3685	12.0018	0.000531498	0.0292308
wt_h3k27ac.q.05_peak_70630	wt_h3k27ac.q.05_peak_70630	-1.27719	2.36849	12.0018	0.000531503	0.0292308
wt_h3k27ac.q.05_peak_8524	wt_h3k27ac.q.05_peak_8524	-0.790657	3.55065	11.9982	0.000532511	0.0292607
wt_h3k27ac.q.05_peak_60043	wt_h3k27ac.q.05_peak_60043	0.227251	7.73628	11.9929	0.000534041	0.0293193
wt_h3k27ac.q.05_peak_77964	wt_h3k27ac.q.05_peak_77964	-1.04284	3.34987	11.9906	0.000534702	0.0293286
wt_h3k27ac.q.05_peak_58188	wt_h3k27ac.q.05_peak_58188	-1.04633	2.83799	11.9863	0.00053594	0.0293286
wt_h3k27ac.q.05_peak_56804	wt_h3k27ac.q.05_peak_56804	-1.04632	2.83795	11.9862	0.000535966	0.0293286
wt_h3k27ac.q.05_peak_22893	wt_h3k27ac.q.05_peak_22893	-1.46472	2.34988	11.9851	0.000536266	0.0293286
wt_h3k27ac.q.05_peak_76673	wt_h3k27ac.q.05_peak_76673	-1.58099	2.10543	11.9825	0.000537011	0.0293286
wt_h3k27ac.q.05_peak_33024	wt_h3k27ac.q.05_peak_33024	0.471559	4.95358	11.9813	0.000537372	0.0293286
wt_h3k27ac.q.05_peak_3930	wt_h3k27ac.q.05_peak_3930	0.549498	4.69791	11.981	0.000537465	0.0293286
wt_h3k27ac.q.05_peak_11277	wt_h3k27ac.q.05_peak_11277	-1.02189	2.90324	11.9668	0.000541555	0.0295262
wt_h3k27ac.q.05_peak_27973	wt_h3k27ac.q.05_peak_27973	0.481608	4.9811	11.9641	0.000542363	0.0295447
wt_h3k27ac.q.05_peak_21124	wt_h3k27ac.q.05_peak_21124	-0.733033	3.7625	11.9618	0.000543018	0.0295448
wt_h3k27ac.q.05_peak_6092	wt_h3k27ac.q.05_peak_6092	-0.82258	3.50094	11.9608	0.000543301	0.0295448
wt_h3k27ac.q.05_peak_40559	wt_h3k27ac.q.05_peak_40559	0.985286	2.97799	11.957	0.000544415	0.029555
wt_h3k27ac.q.05_peak_2396	wt_h3k27ac.q.05_peak_2396	-0.696006	3.88396	11.957	0.000544425	0.029555
wt_h3k27ac.q.05_peak_71197	wt_h3k27ac.q.05_peak_71197	-1.77505	1.81099	11.9509	0.000546204	0.0296261
wt_h3k27ac.q.05_peak_27590	wt_h3k27ac.q.05_peak_27590	-1.40951	2.74124	11.9455	0.000547787	0.02968
wt_h3k27ac.q.05_peak_74674	wt_h3k27ac.q.05_peak_74674	0.483756	4.87766	11.9443	0.00054814	0.02968
wt_h3k27ac.q.05_peak_69158	wt_h3k27ac.q.05_peak_69158	-1.69271	2.08306	11.9365	0.000550459	0.0297272
wt_h3k27ac.q.05_peak_1860	wt_h3k27ac.q.05_peak_1860	-0.884433	3.253	11.9333	0.000551402	0.0297272
wt_h3k27ac.q.05_peak_15086	wt_h3k27ac.q.05_peak_15086	-0.884431	3.25298	11.9332	0.000551422	0.0297272
wt_h3k27ac.q.05_peak_1411	wt_h3k27ac.q.05_peak_1411	-0.495633	4.81091	11.9314	0.000551971	0.0297272
wt_h3k27ac.q.05_peak_40905	wt_h3k27ac.q.05_peak_40905	0.835085	3.39606	11.9303	0.000552294	0.0297272
wt_h3k27ac.q.05_peak_32260	wt_h3k27ac.q.05_peak_32260	-1.22403	2.45814	11.9271	0.000553233	0.0297272
wt_h3k27ac.q.05_peak_6884	wt_h3k27ac.q.05_peak_6884	-1.22403	2.45813	11.9271	0.000553241	0.0297272
wt_h3k27ac.q.05_peak_71137	wt_h3k27ac.q.05_peak_71137	-1.22403	2.45812	11.927	0.00055325	0.0297272
wt_h3k27ac.q.05_peak_62443	wt_h3k27ac.q.05_peak_62443	-1.22403	2.45811	11.927	0.000553253	0.0297272
wt_h3k27ac.q.05_peak_8482	wt_h3k27ac.q.05_peak_8482	0.856056	3.3311	11.9235	0.000554315	0.029759
wt_h3k27ac.q.05_peak_72507	wt_h3k27ac.q.05_peak_72507	-0.60041	4.27781	11.904	0.000560123	0.0300326
wt_h3k27ac.q.05_peak_52079	wt_h3k27ac.q.05_peak_52079	-0.957387	3.62988	11.9032	0.000560366	0.0300326
wt_h3k27ac.q.05_peak_33770	wt_h3k27ac.q.05_peak_33770	-0.945097	3.13833	11.8996	0.000561475	0.0300666
wt_h3k27ac.q.05_peak_21730	wt_h3k27ac.q.05_peak_21730	-1.10421	2.69779	11.8972	0.000562179	0.0300787
wt_h3k27ac.q.05_peak_27942	wt_h3k27ac.q.05_peak_27942	-0.979728	2.98995	11.8921	0.000563724	0.0301219
wt_h3k27ac.q.05_peak_19045	wt_h3k27ac.q.05_peak_19045	-1.17843	2.54251	11.8893	0.000564588	0.0301219
wt_h3k27ac.q.05_peak_19233	wt_h3k27ac.q.05_peak_19233	-1.05581	3.07178	11.8878	0.000565036	0.0301219
wt_h3k27ac.q.05_peak_47452	wt_h3k27ac.q.05_peak_47452	0.692876	3.88409	11.8861	0.000565547	0.0301219
wt_h3k27ac.q.05_peak_72897	wt_h3k27ac.q.05_peak_72897	0.773525	3.59101	11.8836	0.000566295	0.0301219
wt_h3k27ac.q.05_peak_61114	wt_h3k27ac.q.05_peak_61114	0.461072	5.00507	11.8833	0.000566382	0.0301219
wt_h3k27ac.q.05_peak_38045	wt_h3k27ac.q.05_peak_38045	-0.9271	3.12746	11.8824	0.000566665	0.0301219
wt_h3k27ac.q.05_peak_56033	wt_h3k27ac.q.05_peak_56033	-0.514428	4.7014	11.882	0.000566806	0.0301219
wt_h3k27ac.q.05_peak_9119	wt_h3k27ac.q.05_peak_9119	-0.340923	5.86439	11.8786	0.000567822	0.0301505
wt_h3k27ac.q.05_peak_75844	wt_h3k27ac.q.05_peak_75844	0.910083	3.25311	11.8767	0.000568403	0.030156
wt_h3k27ac.q.05_peak_44394	wt_h3k27ac.q.05_peak_44394	0.341306	5.85806	11.8676	0.000571185	0.0302781
wt_h3k27ac.q.05_peak_13139	wt_h3k27ac.q.05_peak_13139	-0.764986	3.62221	11.8652	0.000571926	0.0302847
wt_h3k27ac.q.05_peak_60585	wt_h3k27ac.q.05_peak_60585	0.545969	4.68681	11.8641	0.00057227	0.0302847
wt_h3k27ac.q.05_peak_18410	wt_h3k27ac.q.05_peak_18410	0.363555	5.67574	11.8565	0.000574607	0.0303829
wt_h3k27ac.q.05_peak_78702	wt_h3k27ac.q.05_peak_78702	0.300387	6.22415	11.8492	0.000576858	0.0304763
wt_h3k27ac.q.05_peak_61128	wt_h3k27ac.q.05_peak_61128	-0.780585	3.56688	11.8457	0.000577946	0.0305083
wt_h3k27ac.q.05_peak_31039	wt_h3k27ac.q.05_peak_31039	-1.35901	2.21238	11.8384	0.000580205	0.0305234
wt_h3k27ac.q.05_peak_58907	wt_h3k27ac.q.05_peak_58907	-1.35901	2.21238	11.8384	0.000580205	0.0305234
wt_h3k27ac.q.05_peak_64459	wt_h3k27ac.q.05_peak_64459	-1.35901	2.21236	11.8384	0.000580211	0.0305234
wt_h3k27ac.q.05_peak_45544	wt_h3k27ac.q.05_peak_45544	-1.35901	2.21236	11.8384	0.000580214	0.0305234
wt_h3k27ac.q.05_peak_79959	wt_h3k27ac.q.05_peak_79959	0.788716	3.5344	11.8361	0.000580933	0.0305234
wt_h3k27ac.q.05_peak_43740	wt_h3k27ac.q.05_peak_43740	0.501103	4.76619	11.8355	0.000581136	0.0305234
wt_h3k27ac.q.05_peak_82160	wt_h3k27ac.q.05_peak_82160	-2.01314	2.29253	11.8308	0.000582585	0.0305741
wt_h3k27ac.q.05_peak_4378	wt_h3k27ac.q.05_peak_4378	-1.54518	2.0831	11.8257	0.000584186	0.0306326
wt_h3k27ac.q.05_peak_48540	wt_h3k27ac.q.05_peak_48540	0.242451	6.84565	11.822	0.000585359	0.0306441
wt_h3k27ac.q.05_peak_21544	wt_h3k27ac.q.05_peak_21544	0.524458	4.63781	11.8219	0.000585376	0.0306441
wt_h3k27ac.q.05_peak_3418	wt_h3k27ac.q.05_peak_3418	0.600536	4.26313	11.8119	0.000588542	0.0307843
wt_h3k27ac.q.05_peak_71373	wt_h3k27ac.q.05_peak_71373	-1.28998	2.98997	11.8095	0.000589282	0.0307974
wt_h3k27ac.q.05_peak_25082	wt_h3k27ac.q.05_peak_25082	-0.923074	3.38684	11.8067	0.000590164	0.0308129
wt_h3k27ac.q.05_peak_33125	wt_h3k27ac.q.05_peak_33125	-1.72838	2.36849	11.8055	0.000590555	0.0308129
wt_h3k27ac.q.05_peak_67673	wt_h3k27ac.q.05_peak_67673	0.634636	4.11113	11.7998	0.000592363	0.0308573
wt_h3k27ac.q.05_peak_27316	wt_h3k27ac.q.05_peak_27316	0.401661	5.38475	11.7998	0.000592384	0.0308573
wt_h3k27ac.q.05_peak_73536	wt_h3k27ac.q.05_peak_73536	0.316957	6.10559	11.7955	0.000593726	0.0309017
wt_h3k27ac.q.05_peak_1259	wt_h3k27ac.q.05_peak_1259	-1.37213	2.29253	11.7893	0.000595721	0.0309786
wt_h3k27ac.q.05_peak_40169	wt_h3k27ac.q.05_peak_40169	0.457261	5.01692	11.7878	0.000596187	0.0309786
wt_h3k27ac.q.05_peak_30554	wt_h3k27ac.q.05_peak_30554	0.236442	6.91459	11.7826	0.000597856	0.0310398
wt_h3k27ac.q.05_peak_78010	wt_h3k27ac.q.05_peak_78010	0.278236	6.43751	11.7768	0.000599726	0.0311113
wt_h3k27ac.q.05_peak_4804	wt_h3k27ac.q.05_peak_4804	0.382038	5.52411	11.7742	0.000600581	0.03113
wt_h3k27ac.q.05_peak_2465	wt_h3k27ac.q.05_peak_2465	0.890549	3.21246	11.7716	0.000601397	0.0311468
wt_h3k27ac.q.05_peak_11900	wt_h3k27ac.q.05_peak_11900	-0.943001	3.07177	11.7683	0.000602493	0.0311779
wt_h3k27ac.q.05_peak_68512	wt_h3k27ac.q.05_peak_68512	-1.01839	3.04888	11.7626	0.000604324	0.031247
wt_h3k27ac.q.05_peak_44215	wt_h3k27ac.q.05_peak_44215	0.432072	5.17337	11.761	0.000604835	0.0312478
wt_h3k27ac.q.05_peak_68916	wt_h3k27ac.q.05_peak_68916	0.843573	3.34999	11.7556	0.000606596	0.0312926
wt_h3k27ac.q.05_peak_67036	wt_h3k27ac.q.05_peak_67036	-2.05907	1.98999	11.7539	0.000607172	0.0312926
wt_h3k27ac.q.05_peak_77397	wt_h3k27ac.q.05_peak_77397	0.916925	3.71988	11.7527	0.000607535	0.0312926
wt_h3k27ac.q.05_peak_33259	wt_h3k27ac.q.05_peak_33259	0.345374	7.33679	11.7523	0.000607685	0.0312926
wt_h3k27ac.q.05_peak_9653	wt_h3k27ac.q.05_peak_9653	0.504965	4.73426	11.7476	0.000609213	0.0313456
wt_h3k27ac.q.05_peak_38707	wt_h3k27ac.q.05_peak_38707	-0.870261	3.27291	11.7437	0.000610487	0.0313856
wt_h3k27ac.q.05_peak_65663	wt_h3k27ac.q.05_peak_65663	0.380953	5.52822	11.7417	0.000611148	0.031394
wt_h3k27ac.q.05_peak_5044	wt_h3k27ac.q.05_peak_5044	0.289533	6.31687	11.7367	0.000612808	0.0314516
wt_h3k27ac.q.05_peak_1407	wt_h3k27ac.q.05_peak_1407	-1.17845	2.54252	11.7353	0.000613266	0.0314516
wt_h3k27ac.q.05_peak_32194	wt_h3k27ac.q.05_peak_32194	0.537498	4.55898	11.7321	0.000614304	0.0314676
wt_h3k27ac.q.05_peak_74405	wt_h3k27ac.q.05_peak_74405	-0.996883	3.37771	11.7302	0.000614945	0.0314676
wt_h3k27ac.q.05_peak_30738	wt_h3k27ac.q.05_peak_30738	1.18969	2.63777	11.7298	0.000615075	0.0314676
wt_h3k27ac.q.05_peak_36398	wt_h3k27ac.q.05_peak_36398	-1.02296	2.86445	11.7241	0.000616965	0.0315137
wt_h3k27ac.q.05_peak_52894	wt_h3k27ac.q.05_peak_52894	-1.02296	2.86444	11.724	0.000616976	0.0315137
wt_h3k27ac.q.05_peak_41768	wt_h3k27ac.q.05_peak_41768	-0.753182	3.93481	11.7205	0.000618149	0.0315481
wt_h3k27ac.q.05_peak_76225	wt_h3k27ac.q.05_peak_76225	-1.29142	2.3119	11.7025	0.000624152	0.031752
wt_h3k27ac.q.05_peak_33278	wt_h3k27ac.q.05_peak_33278	-1.29142	2.31189	11.7025	0.000624154	0.031752
wt_h3k27ac.q.05_peak_70815	wt_h3k27ac.q.05_peak_70815	-1.29142	2.31189	11.7025	0.000624156	0.031752
wt_h3k27ac.q.05_peak_5798	wt_h3k27ac.q.05_peak_5798	-1.29142	2.31189	11.7025	0.000624158	0.031752
wt_h3k27ac.q.05_peak_42956	wt_h3k27ac.q.05_peak_42956	-0.770766	3.58292	11.6968	0.000626063	0.0318233
wt_h3k27ac.q.05_peak_21576	wt_h3k27ac.q.05_peak_21576	0.336036	5.88089	11.6897	0.00062848	0.0319204
wt_h3k27ac.q.05_peak_28946	wt_h3k27ac.q.05_peak_28946	-0.824604	3.40499	11.6836	0.00063055	0.0319748
wt_h3k27ac.q.05_peak_53187	wt_h3k27ac.q.05_peak_53187	-0.824602	3.40499	11.6835	0.000630564	0.0319748
wt_h3k27ac.q.05_peak_8806	wt_h3k27ac.q.05_peak_8806	-1.49461	2.3685	11.6815	0.000631231	0.0319829
wt_h3k27ac.q.05_peak_41977	wt_h3k27ac.q.05_peak_41977	-0.804981	3.46678	11.6761	0.000633078	0.0320261
wt_h3k27ac.q.05_peak_33560	wt_h3k27ac.q.05_peak_33560	-0.804979	3.46675	11.676	0.0006331	0.0320261
wt_h3k27ac.q.05_peak_38162	wt_h3k27ac.q.05_peak_38162	-0.721111	3.75548	11.6663	0.000636411	0.0321422
wt_h3k27ac.q.05_peak_64172	wt_h3k27ac.q.05_peak_64172	-0.721111	3.75548	11.6663	0.000636413	0.0321422
wt_h3k27ac.q.05_peak_54597	wt_h3k27ac.q.05_peak_54597	-1.04823	2.79733	11.6579	0.000639302	0.032229
wt_h3k27ac.q.05_peak_80033	wt_h3k27ac.q.05_peak_80033	-1.04823	2.79732	11.6579	0.000639307	0.032229
wt_h3k27ac.q.05_peak_37721	wt_h3k27ac.q.05_peak_37721	-0.527142	4.60662	11.6564	0.000639836	0.032229
wt_h3k27ac.q.05_peak_52636	wt_h3k27ac.q.05_peak_52636	0.205982	7.3067	11.6554	0.000640175	0.032229
wt_h3k27ac.q.05_peak_36668	wt_h3k27ac.q.05_peak_36668	0.794825	3.4926	11.6494	0.000642231	0.0322826
wt_h3k27ac.q.05_peak_72733	wt_h3k27ac.q.05_peak_72733	0.614446	4.18121	11.6493	0.000642264	0.0322826
wt_h3k27ac.q.05_peak_67702	wt_h3k27ac.q.05_peak_67702	0.383565	5.81283	11.6476	0.000642854	0.0322865
wt_h3k27ac.q.05_peak_81373	wt_h3k27ac.q.05_peak_81373	0.294583	7.21327	11.646	0.000643403	0.0322884
wt_h3k27ac.q.05_peak_65730	wt_h3k27ac.q.05_peak_65730	0.743937	4.50106	11.6363	0.000646785	0.0324323
wt_h3k27ac.q.05_peak_75252	wt_h3k27ac.q.05_peak_75252	0.373016	5.57509	11.6345	0.000647413	0.032438
wt_h3k27ac.q.05_peak_36091	wt_h3k27ac.q.05_peak_36091	-1.23472	2.40501	11.6178	0.000653235	0.0326779
wt_h3k27ac.q.05_peak_73318	wt_h3k27ac.q.05_peak_73318	-1.23472	2.40501	11.6178	0.000653237	0.0326779
wt_h3k27ac.q.05_peak_76305	wt_h3k27ac.q.05_peak_76305	1.40784	3.17064	11.6158	0.000653943	0.0326873
wt_h3k27ac.q.05_peak_46888	wt_h3k27ac.q.05_peak_46888	0.410137	5.30244	11.611	0.000655625	0.0327454
wt_h3k27ac.q.05_peak_48575	wt_h3k27ac.q.05_peak_48575	0.984497	2.94115	11.6095	0.000656155	0.032746
wt_h3k27ac.q.05_peak_28317	wt_h3k27ac.q.05_peak_28317	-0.882086	3.22263	11.6067	0.000657141	0.0327476
wt_h3k27ac.q.05_peak_68641	wt_h3k27ac.q.05_peak_68641	-1.07654	2.72692	11.6065	0.000657226	0.0327476
wt_h3k27ac.q.05_peak_78588	wt_h3k27ac.q.05_peak_78588	0.531353	4.57508	11.6018	0.000658892	0.0328047
wt_h3k27ac.q.05_peak_72007	wt_h3k27ac.q.05_peak_72007	1.28268	2.59097	11.5977	0.00066033	0.0328504
wt_h3k27ac.q.05_peak_54332	wt_h3k27ac.q.05_peak_54332	0.635391	4.08318	11.5921	0.000662315	0.0328927
wt_h3k27ac.q.05_peak_77934	wt_h3k27ac.q.05_peak_77934	-0.626448	4.26787	11.5862	0.000664431	0.0328927
wt_h3k27ac.q.05_peak_25353	wt_h3k27ac.q.05_peak_25353	-0.827812	3.43182	11.5789	0.000667048	0.0328927
wt_h3k27ac.q.05_peak_16216	wt_h3k27ac.q.05_peak_16216	0.513258	4.66816	11.5764	0.000667945	0.0328927
wt_h3k27ac.q.05_peak_49575	wt_h3k27ac.q.05_peak_49575	-1.18642	2.49249	11.573	0.000669151	0.0328927
wt_h3k27ac.q.05_peak_57370	wt_h3k27ac.q.05_peak_57370	-1.18642	2.49249	11.573	0.000669151	0.0328927
wt_h3k27ac.q.05_peak_26128	wt_h3k27ac.q.05_peak_26128	-1.18642	2.49247	11.573	0.000669168	0.0328927
wt_h3k27ac.q.05_peak_53040	wt_h3k27ac.q.05_peak_53040	-1.18642	2.49247	11.573	0.00066917	0.0328927
wt_h3k27ac.q.05_peak_66648	wt_h3k27ac.q.05_peak_66648	-1.18642	2.49246	11.573	0.000669177	0.0328927
wt_h3k27ac.q.05_peak_54759	wt_h3k27ac.q.05_peak_54759	0.587821	4.29266	11.5688	0.000670685	0.0328927
wt_h3k27ac.q.05_peak_35161	wt_h3k27ac.q.05_peak_35161	-0.667042	3.96573	11.5676	0.0006711	0.0328927
wt_h3k27ac.q.05_peak_34121	wt_h3k27ac.q.05_peak_34121	-0.979522	2.95344	11.5624	0.000672997	0.0328927
wt_h3k27ac.q.05_peak_6511	wt_h3k27ac.q.05_peak_6511	-0.979519	2.95342	11.5623	0.000673021	0.0328927
wt_h3k27ac.q.05_peak_75218	wt_h3k27ac.q.05_peak_75218	-1.30721	2.38684	11.5607	0.000673611	0.0328927
wt_h3k27ac.q.05_peak_76121	wt_h3k27ac.q.05_peak_76121	-0.856543	3.29255	11.56	0.00067385	0.0328927
wt_h3k27ac.q.05_peak_52689	wt_h3k27ac.q.05_peak_52689	-1.14477	2.57495	11.56	0.000673855	0.0328927
wt_h3k27ac.q.05_peak_44797	wt_h3k27ac.q.05_peak_44797	-1.14477	2.57494	11.56	0.000673863	0.0328927
wt_h3k27ac.q.05_peak_27347	wt_h3k27ac.q.05_peak_27347	-1.14477	2.57493	11.56	0.00067387	0.0328927
wt_h3k27ac.q.05_peak_6119	wt_h3k27ac.q.05_peak_6119	-1.14477	2.57494	11.56	0.000673872	0.0328927
wt_h3k27ac.q.05_peak_23948	wt_h3k27ac.q.05_peak_23948	-1.14477	2.57493	11.56	0.000673872	0.0328927
wt_h3k27ac.q.05_peak_34969	wt_h3k27ac.q.05_peak_34969	-1.14477	2.57493	11.56	0.000673874	0.0328927
wt_h3k27ac.q.05_peak_81103	wt_h3k27ac.q.05_peak_81103	-1.38018	2.14919	11.5588	0.000674304	0.0328927
wt_h3k27ac.q.05_peak_23371	wt_h3k27ac.q.05_peak_23371	-1.38018	2.14918	11.5588	0.000674308	0.0328927
wt_h3k27ac.q.05_peak_2256	wt_h3k27ac.q.05_peak_2256	-1.38018	2.14918	11.5588	0.000674311	0.0328927
wt_h3k27ac.q.05_peak_66917	wt_h3k27ac.q.05_peak_66917	-1.38018	2.14917	11.5587	0.000674313	0.0328927
wt_h3k27ac.q.05_peak_62141	wt_h3k27ac.q.05_peak_62141	-0.919151	3.30226	11.5571	0.000674911	0.0328927
wt_h3k27ac.q.05_peak_16515	wt_h3k27ac.q.05_peak_16515	-1.543	1.98999	11.5561	0.000675275	0.0328927
wt_h3k27ac.q.05_peak_57640	wt_h3k27ac.q.05_peak_57640	0.769344	3.56703	11.5547	0.00067578	0.0328927
wt_h3k27ac.q.05_peak_69729	wt_h3k27ac.q.05_peak_69729	-0.761191	3.59874	11.5515	0.000676936	0.0329235
wt_h3k27ac.q.05_peak_76101	wt_h3k27ac.q.05_peak_76101	-1.50265	1.96573	11.5407	0.000680896	0.0330652
wt_h3k27ac.q.05_peak_24296	wt_h3k27ac.q.05_peak_24296	-1.50265	1.96573	11.5407	0.000680898	0.0330652
wt_h3k27ac.q.05_peak_10065	wt_h3k27ac.q.05_peak_10065	-0.713249	3.76955	11.5387	0.000681629	0.0330716
wt_h3k27ac.q.05_peak_31824	wt_h3k27ac.q.05_peak_31824	-0.684983	3.87748	11.5375	0.000682077	0.0330716
wt_h3k27ac.q.05_peak_30147	wt_h3k27ac.q.05_peak_30147	-0.41335	5.27285	11.5329	0.000683743	0.0331269
wt_h3k27ac.q.05_peak_81988	wt_h3k27ac.q.05_peak_81988	0.619613	4.14389	11.5285	0.000685386	0.033181
wt_h3k27ac.q.05_peak_28596	wt_h3k27ac.q.05_peak_28596	0.440702	5.08888	11.5267	0.000686039	0.0331872
wt_h3k27ac.q.05_peak_62778	wt_h3k27ac.q.05_peak_62778	0.715	3.75563	11.5087	0.000692706	0.033484
wt_h3k27ac.q.05_peak_50874	wt_h3k27ac.q.05_peak_50874	0.416869	5.24313	11.5045	0.000694297	0.0335352
wt_h3k27ac.q.05_peak_61610	wt_h3k27ac.q.05_peak_61610	-0.894893	3.17053	11.4742	0.000705695	0.0340026
wt_h3k27ac.q.05_peak_64420	wt_h3k27ac.q.05_peak_64420	-1.00064	2.89043	11.4731	0.000706123	0.0340026
wt_h3k27ac.q.05_peak_8184	wt_h3k27ac.q.05_peak_8184	-1.00064	2.89042	11.473	0.000706131	0.0340026
wt_h3k27ac.q.05_peak_13071	wt_h3k27ac.q.05_peak_13071	-1.00064	2.89042	11.473	0.000706131	0.0340026
wt_h3k27ac.q.05_peak_82843	wt_h3k27ac.q.05_peak_82843	-0.578783	4.32623	11.4693	0.000707543	0.0340316
wt_h3k27ac.q.05_peak_30027	wt_h3k27ac.q.05_peak_30027	-1.66418	1.96572	11.468	0.000708031	0.0340316
wt_h3k27ac.q.05_peak_43285	wt_h3k27ac.q.05_peak_43285	0.422796	5.91462	11.4653	0.000709078	0.0340316
wt_h3k27ac.q.05_peak_51559	wt_h3k27ac.q.05_peak_51559	-0.749551	3.73413	11.4651	0.000709167	0.0340316
wt_h3k27ac.q.05_peak_79459	wt_h3k27ac.q.05_peak_79459	0.409926	5.28534	11.4619	0.000710378	0.0340316
wt_h3k27ac.q.05_peak_25505	wt_h3k27ac.q.05_peak_25505	-0.654705	3.98993	11.4616	0.000710505	0.0340316
wt_h3k27ac.q.05_peak_40182	wt_h3k27ac.q.05_peak_40182	-0.654704	3.98993	11.4616	0.000710509	0.0340316
wt_h3k27ac.q.05_peak_25722	wt_h3k27ac.q.05_peak_25722	-1.37622	2.49244	11.4557	0.000712759	0.0340915
wt_h3k27ac.q.05_peak_9375	wt_h3k27ac.q.05_peak_9375	-0.476284	4.86438	11.4545	0.000713202	0.0340915
wt_h3k27ac.q.05_peak_39652	wt_h3k27ac.q.05_peak_39652	-1.27985	2.49245	11.4541	0.000713381	0.0340915
wt_h3k27ac.q.05_peak_68892	wt_h3k27ac.q.05_peak_68892	0.551461	4.4539	11.4507	0.000714673	0.0341274
wt_h3k27ac.q.05_peak_47381	wt_h3k27ac.q.05_peak_47381	-0.737959	3.66801	11.4456	0.000716625	0.0341947
wt_h3k27ac.q.05_peak_35557	wt_h3k27ac.q.05_peak_35557	-0.641335	4.04308	11.4398	0.000718876	0.0342412
wt_h3k27ac.q.05_peak_45601	wt_h3k27ac.q.05_peak_45601	-0.641335	4.04307	11.4398	0.00071889	0.0342412
wt_h3k27ac.q.05_peak_33701	wt_h3k27ac.q.05_peak_33701	-0.941831	3.03725	11.4389	0.000719228	0.0342412
wt_h3k27ac.q.05_peak_72924	wt_h3k27ac.q.05_peak_72924	-0.462978	4.941	11.4326	0.000721665	0.0343104
wt_h3k27ac.q.05_peak_58536	wt_h3k27ac.q.05_peak_58536	0.298936	6.46807	11.4323	0.000721769	0.0343104
wt_h3k27ac.q.05_peak_66696	wt_h3k27ac.q.05_peak_66696	0.585113	4.44073	11.4304	0.000722512	0.0343199
wt_h3k27ac.q.05_peak_36077	wt_h3k27ac.q.05_peak_36077	0.887669	3.18122	11.4286	0.000723218	0.0343275
wt_h3k27ac.q.05_peak_49647	wt_h3k27ac.q.05_peak_49647	-0.86763	3.24292	11.4181	0.000727333	0.0344885
wt_h3k27ac.q.05_peak_61005	wt_h3k27ac.q.05_peak_61005	0.840002	3.32159	11.4171	0.000727702	0.0344885
wt_h3k27ac.q.05_peak_53305	wt_h3k27ac.q.05_peak_53305	-1.5817	2.01381	11.4086	0.000731056	0.034607
wt_h3k27ac.q.05_peak_52196	wt_h3k27ac.q.05_peak_52196	-1.51699	2.23285	11.408	0.0007313	0.034607
wt_h3k27ac.q.05_peak_18190	wt_h3k27ac.q.05_peak_18190	-1.30713	2.25302	11.4065	0.000731884	0.0346087
wt_h3k27ac.q.05_peak_72719	wt_h3k27ac.q.05_peak_72719	-1.09589	3.26298	11.4039	0.000732905	0.034631
wt_h3k27ac.q.05_peak_2929	wt_h3k27ac.q.05_peak_2929	0.505175	4.69054	11.3991	0.000734815	0.0346729
wt_h3k27ac.q.05_peak_42848	wt_h3k27ac.q.05_peak_42848	0.459523	5.29021	11.3989	0.00073489	0.0346729
wt_h3k27ac.q.05_peak_79432	wt_h3k27ac.q.05_peak_79432	0.538917	4.50947	11.3858	0.000740094	0.0348674
wt_h3k27ac.q.05_peak_63524	wt_h3k27ac.q.05_peak_63524	1.0271	2.81109	11.3857	0.000740119	0.0348674
wt_h3k27ac.q.05_peak_24702	wt_h3k27ac.q.05_peak_24702	-0.662828	3.94726	11.3834	0.000741029	0.0348842
wt_h3k27ac.q.05_peak_16161	wt_h3k27ac.q.05_peak_16161	-0.843251	3.31187	11.3817	0.000741693	0.0348894
wt_h3k27ac.q.05_peak_16456	wt_h3k27ac.q.05_peak_16456	0.215752	7.13314	11.377	0.000743578	0.0349521
wt_h3k27ac.q.05_peak_7735	wt_h3k27ac.q.05_peak_7735	0.765435	3.85801	11.3732	0.00074513	0.0349989
wt_h3k27ac.q.05_peak_71967	wt_h3k27ac.q.05_peak_71967	0.739026	4.18648	11.3667	0.000747718	0.0350943
wt_h3k27ac.q.05_peak_38703	wt_h3k27ac.q.05_peak_38703	-0.784051	3.59082	11.3652	0.000748328	0.0350969
wt_h3k27ac.q.05_peak_41204	wt_h3k27ac.q.05_peak_41204	-0.583179	4.29253	11.3633	0.000749079	0.0351018
wt_h3k27ac.q.05_peak_28241	wt_h3k27ac.q.05_peak_28241	-0.821315	3.37769	11.3622	0.000749546	0.0351018
wt_h3k27ac.q.05_peak_65738	wt_h3k27ac.q.05_peak_65738	0.661143	3.94739	11.3576	0.000751417	0.0351464
wt_h3k27ac.q.05_peak_1483	wt_h3k27ac.q.05_peak_1483	-0.648713	4.00191	11.3558	0.000752147	0.0351464
wt_h3k27ac.q.05_peak_69924	wt_h3k27ac.q.05_peak_69924	-0.648711	4.00189	11.3557	0.000752171	0.0351464
wt_h3k27ac.q.05_peak_15536	wt_h3k27ac.q.05_peak_15536	-0.529048	4.55877	11.3475	0.000755487	0.0352715
wt_h3k27ac.q.05_peak_58127	wt_h3k27ac.q.05_peak_58127	-0.281299	6.5332	11.3463	0.000755967	0.0352715
wt_h3k27ac.q.05_peak_47107	wt_h3k27ac.q.05_peak_47107	0.527335	4.56298	11.3322	0.000761764	0.0354889
wt_h3k27ac.q.05_peak_43170	wt_h3k27ac.q.05_peak_43170	-1.05027	2.7555	11.3296	0.000762794	0.0354889
wt_h3k27ac.q.05_peak_41616	wt_h3k27ac.q.05_peak_41616	-0.520299	4.60269	11.3291	0.000763032	0.0354889
wt_h3k27ac.q.05_peak_47520	wt_h3k27ac.q.05_peak_47520	0.294858	6.21255	11.329	0.000763077	0.0354889
wt_h3k27ac.q.05_peak_49145	wt_h3k27ac.q.05_peak_49145	0.506834	5.52615	11.3281	0.000763438	0.0354889
wt_h3k27ac.q.05_peak_40073	wt_h3k27ac.q.05_peak_40073	0.790716	3.4669	11.3172	0.000767931	0.0356647
wt_h3k27ac.q.05_peak_45543	wt_h3k27ac.q.05_peak_45543	0.930359	3.04895	11.3162	0.00076835	0.0356647
wt_h3k27ac.q.05_peak_55426	wt_h3k27ac.q.05_peak_55426	0.487556	5.3847	11.3097	0.000771022	0.0357624
wt_h3k27ac.q.05_peak_58704	wt_h3k27ac.q.05_peak_58704	-1.60972	2.2925	11.306	0.00077256	0.0358074
wt_h3k27ac.q.05_peak_19995	wt_h3k27ac.q.05_peak_19995	-0.463936	4.91906	11.3034	0.000773639	0.0358311
wt_h3k27ac.q.05_peak_17161	wt_h3k27ac.q.05_peak_17161	0.388938	5.41419	11.2999	0.000775099	0.0358686
wt_h3k27ac.q.05_peak_25374	wt_h3k27ac.q.05_peak_25374	1.07376	2.79743	11.2981	0.000775881	0.0358686
wt_h3k27ac.q.05_peak_36860	wt_h3k27ac.q.05_peak_36860	0.500778	5.35942	11.2932	0.000777918	0.0358686
wt_h3k27ac.q.05_peak_54899	wt_h3k27ac.q.05_peak_54899	0.63086	4.06618	11.292	0.000778416	0.0358686
wt_h3k27ac.q.05_peak_44655	wt_h3k27ac.q.05_peak_44655	1.05215	2.74138	11.2907	0.000778966	0.0358686
wt_h3k27ac.q.05_peak_26641	wt_h3k27ac.q.05_peak_26641	1.05215	2.7414	11.2907	0.000778977	0.0358686
wt_h3k27ac.q.05_peak_32716	wt_h3k27ac.q.05_peak_32716	-1.46388	2.34984	11.29	0.000779255	0.0358686
wt_h3k27ac.q.05_peak_79322	wt_h3k27ac.q.05_peak_79322	0.46316	4.91924	11.2874	0.000780335	0.0358686
wt_h3k27ac.q.05_peak_5400	wt_h3k27ac.q.05_peak_5400	-1.40392	2.08309	11.2851	0.000781302	0.0358686
wt_h3k27ac.q.05_peak_26832	wt_h3k27ac.q.05_peak_26832	-1.40392	2.08309	11.2851	0.000781305	0.0358686
wt_h3k27ac.q.05_peak_19371	wt_h3k27ac.q.05_peak_19371	-1.40392	2.08308	11.2851	0.000781309	0.0358686
wt_h3k27ac.q.05_peak_16478	wt_h3k27ac.q.05_peak_16478	0.255433	6.62435	11.2843	0.000781635	0.0358686
wt_h3k27ac.q.05_peak_14571	wt_h3k27ac.q.05_peak_14571	-2.17891	2.19159	11.2831	0.000782178	0.0358686
wt_h3k27ac.q.05_peak_34900	wt_h3k27ac.q.05_peak_34900	-1.07971	2.683	11.2799	0.000783526	0.0358686
wt_h3k27ac.q.05_peak_60203	wt_h3k27ac.q.05_peak_60203	-1.07971	2.68299	11.2798	0.00078353	0.0358686
wt_h3k27ac.q.05_peak_46435	wt_h3k27ac.q.05_peak_46435	-1.0797	2.68297	11.2798	0.000783548	0.0358686
wt_h3k27ac.q.05_peak_41536	wt_h3k27ac.q.05_peak_41536	0.900007	3.12757	11.2711	0.000787227	0.0360109
wt_h3k27ac.q.05_peak_71030	wt_h3k27ac.q.05_peak_71030	0.718269	4.04322	11.2693	0.000787977	0.0360191
wt_h3k27ac.q.05_peak_53723	wt_h3k27ac.q.05_peak_53723	0.572457	4.75566	11.2653	0.000789674	0.0360705
wt_h3k27ac.q.05_peak_70846	wt_h3k27ac.q.05_peak_70846	-1.1951	2.44063	11.2579	0.000792854	0.0361698
wt_h3k27ac.q.05_peak_22721	wt_h3k27ac.q.05_peak_22721	0.695697	5.11405	11.2544	0.000794334	0.0361698
wt_h3k27ac.q.05_peak_32659	wt_h3k27ac.q.05_peak_32659	-1.11305	2.60666	11.2485	0.00079686	0.0361698
wt_h3k27ac.q.05_peak_1401	wt_h3k27ac.q.05_peak_1401	-1.11305	2.60665	11.2485	0.000796866	0.0361698
wt_h3k27ac.q.05_peak_38460	wt_h3k27ac.q.05_peak_38460	-1.11305	2.60664	11.2485	0.000796876	0.0361698
wt_h3k27ac.q.05_peak_73652	wt_h3k27ac.q.05_peak_73652	-1.11305	2.60662	11.2485	0.000796888	0.0361698
wt_h3k27ac.q.05_peak_76180	wt_h3k27ac.q.05_peak_76180	0.873142	3.20211	11.2483	0.000796956	0.0361698
wt_h3k27ac.q.05_peak_21447	wt_h3k27ac.q.05_peak_21447	0.873139	3.20213	11.2482	0.000796987	0.0361698
wt_h3k27ac.q.05_peak_58378	wt_h3k27ac.q.05_peak_58378	0.482903	4.79746	11.2482	0.000797008	0.0361698
wt_h3k27ac.q.05_peak_17883	wt_h3k27ac.q.05_peak_17883	-1.15115	2.52604	11.2395	0.000800735	0.0362616
wt_h3k27ac.q.05_peak_51846	wt_h3k27ac.q.05_peak_51846	-1.15115	2.52604	11.2395	0.000800743	0.0362616
wt_h3k27ac.q.05_peak_14873	wt_h3k27ac.q.05_peak_14873	-1.15115	2.52603	11.2395	0.000800754	0.0362616
wt_h3k27ac.q.05_peak_22519	wt_h3k27ac.q.05_peak_22519	1.60737	2.01389	11.2354	0.000802532	0.036316
wt_h3k27ac.q.05_peak_63647	wt_h3k27ac.q.05_peak_63647	-0.709075	3.74838	11.2336	0.000803301	0.0363194
wt_h3k27ac.q.05_peak_60246	wt_h3k27ac.q.05_peak_60246	-0.9793	2.91596	11.2325	0.000803758	0.0363194
wt_h3k27ac.q.05_peak_24936	wt_h3k27ac.q.05_peak_24936	0.729637	3.66817	11.2302	0.000804775	0.0363382
wt_h3k27ac.q.05_peak_61917	wt_h3k27ac.q.05_peak_61917	0.497349	4.7126	11.2272	0.000806054	0.0363382
wt_h3k27ac.q.05_peak_69841	wt_h3k27ac.q.05_peak_69841	0.765017	3.54261	11.2265	0.000806372	0.0363382
wt_h3k27ac.q.05_peak_69996	wt_h3k27ac.q.05_peak_69996	-0.923987	3.06037	11.2249	0.00080705	0.0363382
wt_h3k27ac.q.05_peak_28397	wt_h3k27ac.q.05_peak_28397	-0.923987	3.06036	11.2249	0.000807055	0.0363382
wt_h3k27ac.q.05_peak_78150	wt_h3k27ac.q.05_peak_78150	-0.566531	4.3545	11.2228	0.000808003	0.0363549
wt_h3k27ac.q.05_peak_42098	wt_h3k27ac.q.05_peak_42098	-1.12396	2.96573	11.2154	0.000811224	0.0364739
wt_h3k27ac.q.05_peak_49098	wt_h3k27ac.q.05_peak_49098	-0.671074	3.98388	11.2124	0.00081253	0.036502
wt_h3k27ac.q.05_peak_49513	wt_h3k27ac.q.05_peak_49513	0.446745	5.01099	11.2113	0.000813007	0.036502
wt_h3k27ac.q.05_peak_58405	wt_h3k27ac.q.05_peak_58405	1.08035	2.66813	11.2098	0.000813677	0.0365061
wt_h3k27ac.q.05_peak_22895	wt_h3k27ac.q.05_peak_22895	0.585174	4.83144	11.208	0.000814475	0.0365159
wt_h3k27ac.q.05_peak_22838	wt_h3k27ac.q.05_peak_22838	-1.04294	2.91598	11.2036	0.000816383	0.0365626
wt_h3k27ac.q.05_peak_55322	wt_h3k27ac.q.05_peak_55322	-1.38613	3.09428	11.2029	0.000816677	0.0365626
wt_h3k27ac.q.05_peak_48420	wt_h3k27ac.q.05_peak_48420	-0.741238	3.7484	11.1995	0.000818207	0.0366052
wt_h3k27ac.q.05_peak_1182	wt_h3k27ac.q.05_peak_1182	0.314961	6.00505	11.1979	0.00081891	0.0366107
wt_h3k27ac.q.05_peak_14993	wt_h3k27ac.q.05_peak_14993	-0.574683	4.31185	11.1952	0.000820089	0.0366374
wt_h3k27ac.q.05_peak_34390	wt_h3k27ac.q.05_peak_34390	0.514889	4.64165	11.1923	0.000821362	0.0366683
wt_h3k27ac.q.05_peak_23338	wt_h3k27ac.q.05_peak_23338	-0.368113	5.55873	11.1898	0.000822496	0.036693
wt_h3k27ac.q.05_peak_4072	wt_h3k27ac.q.05_peak_4072	0.327936	5.88742	11.1863	0.000824031	0.036717
wt_h3k27ac.q.05_peak_40823	wt_h3k27ac.q.05_peak_40823	-1.08348	2.94102	11.1859	0.000824198	0.036717
wt_h3k27ac.q.05_peak_78764	wt_h3k27ac.q.05_peak_78764	-1.5026	1.96572	11.1721	0.000830357	0.0369249
wt_h3k27ac.q.05_peak_76794	wt_h3k27ac.q.05_peak_76794	-0.69066	3.81097	11.1715	0.000830617	0.0369249
wt_h3k27ac.q.05_peak_61881	wt_h3k27ac.q.05_peak_61881	-0.69066	3.81097	11.1715	0.000830622	0.0369249
wt_h3k27ac.q.05_peak_2159	wt_h3k27ac.q.05_peak_2159	0.510939	4.63008	11.1682	0.000832118	0.0369654
wt_h3k27ac.q.05_peak_67717	wt_h3k27ac.q.05_peak_67717	0.692999	3.79746	11.1652	0.000833463	0.0369809
wt_h3k27ac.q.05_peak_77468	wt_h3k27ac.q.05_peak_77468	-1.49915	2.44066	11.1648	0.00083364	0.0369809
wt_h3k27ac.q.05_peak_70018	wt_h3k27ac.q.05_peak_70018	0.911558	3.46688	11.1547	0.000838209	0.0371575
wt_h3k27ac.q.05_peak_4713	wt_h3k27ac.q.05_peak_4713	-1.15313	2.90328	11.151	0.000839876	0.0371877
wt_h3k27ac.q.05_peak_461	wt_h3k27ac.q.05_peak_461	-1.15185	2.72692	11.1497	0.000840457	0.0371877
wt_h3k27ac.q.05_peak_68267	wt_h3k27ac.q.05_peak_68267	-0.676629	4.0488	11.1492	0.000840661	0.0371877
wt_h3k27ac.q.05_peak_9630	wt_h3k27ac.q.05_peak_9630	-0.892646	3.13836	11.147	0.000841692	0.0372073
wt_h3k27ac.q.05_peak_38420	wt_h3k27ac.q.05_peak_38420	-1.00106	2.85127	11.1434	0.00084332	0.0372276
wt_h3k27ac.q.05_peak_40233	wt_h3k27ac.q.05_peak_40233	-1.00106	2.85125	11.1434	0.000843332	0.0372276
wt_h3k27ac.q.05_peak_27911	wt_h3k27ac.q.05_peak_27911	0.298104	6.15607	11.1374	0.000846026	0.0373204
wt_h3k27ac.q.05_peak_62295	wt_h3k27ac.q.05_peak_62295	0.397785	5.32879	11.1318	0.000848618	0.0374086
wt_h3k27ac.q.05_peak_61970	wt_h3k27ac.q.05_peak_61970	0.526301	4.54263	11.1265	0.000851008	0.0374877
wt_h3k27ac.q.05_peak_80748	wt_h3k27ac.q.05_peak_80748	0.408059	5.25565	11.1252	0.000851631	0.037489
wt_h3k27ac.q.05_peak_68014	wt_h3k27ac.q.05_peak_68014	0.201763	7.64605	11.1197	0.000854171	0.0375367
wt_h3k27ac.q.05_peak_67713	wt_h3k27ac.q.05_peak_67713	0.913446	3.07187	11.1182	0.00085487	0.0375367
wt_h3k27ac.q.05_peak_65891	wt_h3k27ac.q.05_peak_65891	-1.32456	2.19163	11.1141	0.000856733	0.0375367
wt_h3k27ac.q.05_peak_9619	wt_h3k27ac.q.05_peak_9619	-1.32456	2.19162	11.1141	0.000856747	0.0375367
wt_h3k27ac.q.05_peak_41049	wt_h3k27ac.q.05_peak_41049	-1.32456	2.19162	11.1141	0.000856747	0.0375367
wt_h3k27ac.q.05_peak_20931	wt_h3k27ac.q.05_peak_20931	-1.32456	2.19161	11.1141	0.000856751	0.0375367
wt_h3k27ac.q.05_peak_62921	wt_h3k27ac.q.05_peak_62921	0.432228	5.11671	11.1138	0.00085688	0.0375367
wt_h3k27ac.q.05_peak_64034	wt_h3k27ac.q.05_peak_64034	0.701522	3.92237	11.1111	0.000858113	0.0375566
wt_h3k27ac.q.05_peak_10546	wt_h3k27ac.q.05_peak_10546	-0.940602	3.00194	11.1096	0.000858809	0.0375566
wt_h3k27ac.q.05_peak_13922	wt_h3k27ac.q.05_peak_13922	0.453366	5.38698	11.1083	0.000859405	0.0375566
wt_h3k27ac.q.05_peak_40704	wt_h3k27ac.q.05_peak_40704	0.278867	6.50437	11.1077	0.000859716	0.0375566
wt_h3k27ac.q.05_peak_54365	wt_h3k27ac.q.05_peak_54365	0.247253	6.6962	11.1051	0.000860916	0.037583
wt_h3k27ac.q.05_peak_18425	wt_h3k27ac.q.05_peak_18425	1.14886	2.50944	11.1022	0.000862265	0.0376158
wt_h3k27ac.q.05_peak_40913	wt_h3k27ac.q.05_peak_40913	0.815763	3.35931	11.0988	0.000863846	0.0376477
wt_h3k27ac.q.05_peak_63196	wt_h3k27ac.q.05_peak_63196	-0.747816	3.59084	11.098	0.000864187	0.0376477
wt_h3k27ac.q.05_peak_38432	wt_h3k27ac.q.05_peak_38432	0.41796	5.18392	11.0945	0.000865828	0.0376931
wt_h3k27ac.q.05_peak_21034	wt_h3k27ac.q.05_peak_21034	0.755589	3.55892	11.0925	0.000866765	0.0377078
wt_h3k27ac.q.05_peak_52855	wt_h3k27ac.q.05_peak_52855	0.46164	4.90341	11.0897	0.000868089	0.0377394
wt_h3k27ac.q.05_peak_65503	wt_h3k27ac.q.05_peak_65503	-0.658509	3.92854	11.0884	0.000868699	0.0377399
wt_h3k27ac.q.05_peak_44910	wt_h3k27ac.q.05_peak_44910	-1.29297	2.44062	11.0833	0.000871079	0.0378057
wt_h3k27ac.q.05_peak_15115	wt_h3k27ac.q.05_peak_15115	-0.63068	4.16516	11.0826	0.000871411	0.0378057
wt_h3k27ac.q.05_peak_22512	wt_h3k27ac.q.05_peak_22512	-0.336965	5.79725	11.0794	0.000872902	0.0378443
wt_h3k27ac.q.05_peak_45029	wt_h3k27ac.q.05_peak_45029	-0.763016	3.5343	11.0684	0.000878137	0.0380193
wt_h3k27ac.q.05_peak_78496	wt_h3k27ac.q.05_peak_78496	-0.763015	3.53429	11.0683	0.000878143	0.0380193
wt_h3k27ac.q.05_peak_51092	wt_h3k27ac.q.05_peak_51092	-0.540856	4.46246	11.0658	0.000879332	0.0380335
wt_h3k27ac.q.05_peak_13398	wt_h3k27ac.q.05_peak_13398	-0.558643	4.37303	11.0639	0.000880234	0.0380335
wt_h3k27ac.q.05_peak_25788	wt_h3k27ac.q.05_peak_25788	0.389344	5.42981	11.0638	0.000880278	0.0380335
wt_h3k27ac.q.05_peak_16334	wt_h3k27ac.q.05_peak_16334	-0.840121	3.28273	11.0585	0.000882823	0.038104
wt_h3k27ac.q.05_peak_38238	wt_h3k27ac.q.05_peak_38238	-0.500629	4.67546	11.0579	0.000883119	0.038104
wt_h3k27ac.q.05_peak_59243	wt_h3k27ac.q.05_peak_59243	-0.494108	5.27772	11.0563	0.000883849	0.0381069
wt_h3k27ac.q.05_peak_17699	wt_h3k27ac.q.05_peak_17699	0.434073	5.07194	11.054	0.000884942	0.0381069
wt_h3k27ac.q.05_peak_18774	wt_h3k27ac.q.05_peak_18774	0.334545	5.81283	11.0539	0.000884999	0.0381069
wt_h3k27ac.q.05_peak_29166	wt_h3k27ac.q.05_peak_29166	0.571257	4.30719	11.0524	0.000885733	0.0381125
wt_h3k27ac.q.05_peak_31093	wt_h3k27ac.q.05_peak_31093	0.656468	3.92872	11.0509	0.000886425	0.0381141
wt_h3k27ac.q.05_peak_27896	wt_h3k27ac.q.05_peak_27896	0.287379	6.25073	11.0498	0.000886979	0.0381141
wt_h3k27ac.q.05_peak_79222	wt_h3k27ac.q.05_peak_79222	0.262636	6.5117	11.0437	0.000889893	0.0381805
wt_h3k27ac.q.05_peak_41240	wt_h3k27ac.q.05_peak_41240	-1.8922	2.21233	11.0425	0.000890458	0.0381805
wt_h3k27ac.q.05_peak_1640	wt_h3k27ac.q.05_peak_1640	-0.817892	3.34986	11.0412	0.000891105	0.0381805
wt_h3k27ac.q.05_peak_63610	wt_h3k27ac.q.05_peak_63610	-1.82919	2.17052	11.0398	0.000891757	0.0381805
wt_h3k27ac.q.05_peak_78355	wt_h3k27ac.q.05_peak_78355	-0.797824	3.41399	11.0383	0.000892475	0.0381805
wt_h3k27ac.q.05_peak_28881	wt_h3k27ac.q.05_peak_28881	1.02756	2.76967	11.0381	0.000892581	0.0381805
wt_h3k27ac.q.05_peak_24138	wt_h3k27ac.q.05_peak_24138	0.417506	5.32883	11.0377	0.000892762	0.0381805
wt_h3k27ac.q.05_peak_6363	wt_h3k27ac.q.05_peak_6363	0.733428	3.63008	11.032	0.000895516	0.0382724
wt_h3k27ac.q.05_peak_63995	wt_h3k27ac.q.05_peak_63995	0.690565	4.61852	11.0215	0.000900595	0.0384188
wt_h3k27ac.q.05_peak_4321	wt_h3k27ac.q.05_peak_4321	0.276205	6.36177	11.0191	0.000901775	0.0384188
wt_h3k27ac.q.05_peak_13600	wt_h3k27ac.q.05_peak_13600	-1.43074	2.01383	11.0187	0.000901949	0.0384188
wt_h3k27ac.q.05_peak_83013	wt_h3k27ac.q.05_peak_83013	-1.43074	2.01383	11.0187	0.000901953	0.0384188
wt_h3k27ac.q.05_peak_11102	wt_h3k27ac.q.05_peak_11102	-0.906816	3.08308	11.0187	0.000901988	0.0384188
wt_h3k27ac.q.05_peak_52626	wt_h3k27ac.q.05_peak_52626	0.271227	6.41419	11.0161	0.000903225	0.0384399
wt_h3k27ac.q.05_peak_80297	wt_h3k27ac.q.05_peak_80297	-1.25928	2.29255	11.0054	0.000908453	0.0384399
wt_h3k27ac.q.05_peak_48197	wt_h3k27ac.q.05_peak_48197	-1.25928	2.29255	11.0054	0.000908457	0.0384399
wt_h3k27ac.q.05_peak_30279	wt_h3k27ac.q.05_peak_30279	-1.25927	2.29254	11.0054	0.000908469	0.0384399
wt_h3k27ac.q.05_peak_39772	wt_h3k27ac.q.05_peak_39772	-1.25927	2.29254	11.0054	0.000908469	0.0384399
wt_h3k27ac.q.05_peak_39894	wt_h3k27ac.q.05_peak_39894	-1.25927	2.29254	11.0054	0.000908473	0.0384399
wt_h3k27ac.q.05_peak_24876	wt_h3k27ac.q.05_peak_24876	-1.25927	2.29253	11.0054	0.000908477	0.0384399
wt_h3k27ac.q.05_peak_22426	wt_h3k27ac.q.05_peak_22426	-1.25927	2.29253	11.0054	0.000908479	0.0384399
wt_h3k27ac.q.05_peak_19875	wt_h3k27ac.q.05_peak_19875	-1.25927	2.29253	11.0054	0.000908479	0.0384399
wt_h3k27ac.q.05_peak_54819	wt_h3k27ac.q.05_peak_54819	0.451168	4.95668	11.0031	0.000909572	0.0384399
wt_h3k27ac.q.05_peak_61138	wt_h3k27ac.q.05_peak_61138	-0.958874	2.94105	11.0018	0.000910228	0.0384399
wt_h3k27ac.q.05_peak_69933	wt_h3k27ac.q.05_peak_69933	-1.05245	2.71244	11.0015	0.000910385	0.0384399
wt_h3k27ac.q.05_peak_58421	wt_h3k27ac.q.05_peak_58421	-1.05245	2.71242	11.0015	0.000910403	0.0384399
wt_h3k27ac.q.05_peak_1794	wt_h3k27ac.q.05_peak_1794	0.457543	4.91609	10.9941	0.000914036	0.0385674
wt_h3k27ac.q.05_peak_59504	wt_h3k27ac.q.05_peak_59504	0.502674	4.65307	10.9925	0.000914833	0.0385753
wt_h3k27ac.q.05_peak_64791	wt_h3k27ac.q.05_peak_64791	-0.69372	3.77655	10.9892	0.000916454	0.0386178
wt_h3k27ac.q.05_peak_3951	wt_h3k27ac.q.05_peak_3951	-0.652211	3.94106	10.9815	0.000920247	0.0387517
wt_h3k27ac.q.05_peak_47192	wt_h3k27ac.q.05_peak_47192	0.433174	5.2756	10.9789	0.000921572	0.0387644
wt_h3k27ac.q.05_peak_16700	wt_h3k27ac.q.05_peak_16700	0.567303	4.31684	10.978	0.000922016	0.0387644
wt_h3k27ac.q.05_peak_57514	wt_h3k27ac.q.05_peak_57514	0.402478	5.27556	10.9772	0.000922391	0.0387644
wt_h3k27ac.q.05_peak_40365	wt_h3k27ac.q.05_peak_40365	0.747615	4.01391	10.9738	0.000924082	0.0388096
wt_h3k27ac.q.05_peak_82811	wt_h3k27ac.q.05_peak_82811	0.505445	5.27557	10.9707	0.000925654	0.03883
wt_h3k27ac.q.05_peak_59287	wt_h3k27ac.q.05_peak_59287	0.928142	3.01392	10.9704	0.000925798	0.03883
wt_h3k27ac.q.05_peak_50719	wt_h3k27ac.q.05_peak_50719	0.926547	3.26311	10.9575	0.000932242	0.0390742
wt_h3k27ac.q.05_peak_18731	wt_h3k27ac.q.05_peak_18731	-1.08311	2.63768	10.9534	0.000934306	0.0391348
wt_h3k27ac.q.05_peak_52788	wt_h3k27ac.q.05_peak_52788	-0.518802	4.56278	10.9508	0.000935617	0.0391494
wt_h3k27ac.q.05_peak_23793	wt_h3k27ac.q.05_peak_23793	0.664146	3.88411	10.9452	0.000938474	0.0391494
wt_h3k27ac.q.05_peak_59985	wt_h3k27ac.q.05_peak_59985	0.664146	3.88411	10.9452	0.000938474	0.0391494
wt_h3k27ac.q.05_peak_45084	wt_h3k27ac.q.05_peak_45084	0.664145	3.88412	10.9451	0.000938492	0.0391494
wt_h3k27ac.q.05_peak_21737	wt_h3k27ac.q.05_peak_21737	-1.20458	2.38688	10.9442	0.000938983	0.0391494
wt_h3k27ac.q.05_peak_18389	wt_h3k27ac.q.05_peak_18389	-1.20458	2.38688	10.9442	0.000938993	0.0391494
wt_h3k27ac.q.05_peak_332	wt_h3k27ac.q.05_peak_332	-1.20458	2.38687	10.9441	0.000938999	0.0391494
wt_h3k27ac.q.05_peak_75564	wt_h3k27ac.q.05_peak_75564	0.187182	7.49792	10.9424	0.0009399	0.039161
wt_h3k27ac.q.05_peak_61772	wt_h3k27ac.q.05_peak_61772	-1.30747	2.38687	10.9287	0.000946847	0.0393357
wt_h3k27ac.q.05_peak_38609	wt_h3k27ac.q.05_peak_38609	-1.24646	2.34989	10.9248	0.000948863	0.0393357
wt_h3k27ac.q.05_peak_81380	wt_h3k27ac.q.05_peak_81380	-1.11799	2.55882	10.9248	0.000948872	0.0393357
wt_h3k27ac.q.05_peak_47948	wt_h3k27ac.q.05_peak_47948	-1.11799	2.55882	10.9247	0.00094888	0.0393357
wt_h3k27ac.q.05_peak_61517	wt_h3k27ac.q.05_peak_61517	-1.11799	2.55881	10.9247	0.000948884	0.0393357
wt_h3k27ac.q.05_peak_82072	wt_h3k27ac.q.05_peak_82072	0.536972	4.62629	10.9213	0.000950626	0.0393357
wt_h3k27ac.q.05_peak_7074	wt_h3k27ac.q.05_peak_7074	-1.29332	2.44064	10.9212	0.000950683	0.0393357
wt_h3k27ac.q.05_peak_27542	wt_h3k27ac.q.05_peak_27542	0.380198	5.42974	10.92	0.000951313	0.0393357
wt_h3k27ac.q.05_peak_31878	wt_h3k27ac.q.05_peak_31878	-1.15806	2.47542	10.9198	0.000951402	0.0393357
wt_h3k27ac.q.05_peak_65846	wt_h3k27ac.q.05_peak_65846	-1.15806	2.47539	10.9198	0.000951441	0.0393357
wt_h3k27ac.q.05_peak_72635	wt_h3k27ac.q.05_peak_72635	0.235465	6.81461	10.9197	0.00095148	0.0393357
wt_h3k27ac.q.05_peak_73475	wt_h3k27ac.q.05_peak_73475	0.38019	5.42981	10.9195	0.000951574	0.0393357
wt_h3k27ac.q.05_peak_64491	wt_h3k27ac.q.05_peak_64491	-0.80803	4.12745	10.9159	0.000953449	0.0393874
wt_h3k27ac.q.05_peak_22458	wt_h3k27ac.q.05_peak_22458	-0.850636	3.23283	10.9113	0.000955801	0.0394587
wt_h3k27ac.q.05_peak_44171	wt_h3k27ac.q.05_peak_44171	0.724985	3.64543	10.9089	0.000957017	0.0394831
wt_h3k27ac.q.05_peak_31470	wt_h3k27ac.q.05_peak_31470	-1.50174	2.50931	10.9045	0.000959324	0.0395129
wt_h3k27ac.q.05_peak_76589	wt_h3k27ac.q.05_peak_76589	-0.979068	2.87751	10.9027	0.000960229	0.0395129
wt_h3k27ac.q.05_peak_42118	wt_h3k27ac.q.05_peak_42118	-0.979068	2.8775	10.9027	0.000960234	0.0395129
wt_h3k27ac.q.05_peak_78946	wt_h3k27ac.q.05_peak_78946	-0.979067	2.87749	10.9027	0.000960246	0.0395129
wt_h3k27ac.q.05_peak_23890	wt_h3k27ac.q.05_peak_23890	-0.76913	3.49247	10.8995	0.000961917	0.0395537
wt_h3k27ac.q.05_peak_1073	wt_h3k27ac.q.05_peak_1073	-0.277627	6.3321	10.8984	0.000962491	0.0395537
wt_h3k27ac.q.05_peak_28442	wt_h3k27ac.q.05_peak_28442	-0.922305	3.0256	10.8962	0.000963607	0.0395716
wt_h3k27ac.q.05_peak_74670	wt_h3k27ac.q.05_peak_74670	0.466446	4.86783	10.8951	0.000964183	0.0395716
wt_h3k27ac.q.05_peak_42062	wt_h3k27ac.q.05_peak_42062	1.52164	1.86452	10.8898	0.000966969	0.0396602
wt_h3k27ac.q.05_peak_77053	wt_h3k27ac.q.05_peak_77053	-0.827022	3.30226	10.887	0.000968423	0.0396641
wt_h3k27ac.q.05_peak_50098	wt_h3k27ac.q.05_peak_50098	-0.827021	3.30225	10.887	0.000968438	0.0396641
wt_h3k27ac.q.05_peak_44263	wt_h3k27ac.q.05_peak_44263	-0.515678	4.57088	10.8836	0.000970205	0.0396641
wt_h3k27ac.q.05_peak_46152	wt_h3k27ac.q.05_peak_46152	-0.786581	3.43182	10.8831	0.000970445	0.0396641
wt_h3k27ac.q.05_peak_72868	wt_h3k27ac.q.05_peak_72868	-0.78658	3.4318	10.8831	0.000970458	0.0396641
wt_h3k27ac.q.05_peak_63114	wt_h3k27ac.q.05_peak_63114	0.32216	5.89863	10.8824	0.000970838	0.0396641
wt_h3k27ac.q.05_peak_27204	wt_h3k27ac.q.05_peak_27204	0.514281	4.5751	10.8793	0.000972446	0.0397041
wt_h3k27ac.q.05_peak_5463	wt_h3k27ac.q.05_peak_5463	-0.716703	3.67551	10.8751	0.000974636	0.0397678
wt_h3k27ac.q.05_peak_24411	wt_h3k27ac.q.05_peak_24411	1.00462	2.87761	10.8544	0.000985637	0.0401907
wt_h3k27ac.q.05_peak_63751	wt_h3k27ac.q.05_peak_63751	0.394171	5.57315	10.8491	0.00098846	0.0402797
wt_h3k27ac.q.05_peak_26806	wt_h3k27ac.q.05_peak_26806	0.657849	3.89697	10.8445	0.000990913	0.0403536
wt_h3k27ac.q.05_peak_7183	wt_h3k27ac.q.05_peak_7183	1.22689	3.12757	10.8349	0.000996032	0.0405359
wt_h3k27ac.q.05_peak_47122	wt_h3k27ac.q.05_peak_47122	0.944281	2.95355	10.8286	0.00099945	0.0405492
wt_h3k27ac.q.05_peak_47103	wt_h3k27ac.q.05_peak_47103	-1.39232	2.23281	10.8281	0.000999712	0.0405492
wt_h3k27ac.q.05_peak_26398	wt_h3k27ac.q.05_peak_26398	-1.344	2.12749	10.826	0.00100083	0.0405492
wt_h3k27ac.q.05_peak_5385	wt_h3k27ac.q.05_peak_5385	-1.344	2.12749	10.826	0.00100084	0.0405492
wt_h3k27ac.q.05_peak_1827	wt_h3k27ac.q.05_peak_1827	-1.344	2.12748	10.826	0.00100085	0.0405492
wt_h3k27ac.q.05_peak_69578	wt_h3k27ac.q.05_peak_69578	-1.344	2.12747	10.826	0.00100086	0.0405492
wt_h3k27ac.q.05_peak_27156	wt_h3k27ac.q.05_peak_27156	-1.344	2.12747	10.826	0.00100086	0.0405492
wt_h3k27ac.q.05_peak_38158	wt_h3k27ac.q.05_peak_38158	-0.890282	3.10543	10.8197	0.00100423	0.0406599
wt_h3k27ac.q.05_peak_15936	wt_h3k27ac.q.05_peak_15936	-0.512587	4.57888	10.817	0.00100574	0.0406947
wt_h3k27ac.q.05_peak_66951	wt_h3k27ac.q.05_peak_66951	-1.1205	3.00196	10.7993	0.00101538	0.0410266
wt_h3k27ac.q.05_peak_17416	wt_h3k27ac.q.05_peak_17416	-0.882106	3.22263	10.7991	0.00101552	0.0410266
wt_h3k27ac.q.05_peak_2920	wt_h3k27ac.q.05_peak_2920	0.792936	3.39608	10.7984	0.00101589	0.0410266
wt_h3k27ac.q.05_peak_81690	wt_h3k27ac.q.05_peak_81690	0.375612	5.44737	10.7921	0.00101936	0.0411324
wt_h3k27ac.q.05_peak_1995	wt_h3k27ac.q.05_peak_1995	-1.193	2.92855	10.7912	0.00101982	0.0411324
wt_h3k27ac.q.05_peak_20023	wt_h3k27ac.q.05_peak_20023	0.57865	4.23803	10.7872	0.00102203	0.0411806
wt_h3k27ac.q.05_peak_23317	wt_h3k27ac.q.05_peak_23317	0.243821	6.69432	10.7867	0.00102232	0.0411806
wt_h3k27ac.q.05_peak_60468	wt_h3k27ac.q.05_peak_60468	-0.415879	5.15983	10.785	0.00102324	0.0411915
wt_h3k27ac.q.05_peak_59998	wt_h3k27ac.q.05_peak_59998	-1.41576	2.17057	10.7814	0.00102523	0.041245
wt_h3k27ac.q.05_peak_54385	wt_h3k27ac.q.05_peak_54385	-0.9393	2.9657	10.7803	0.00102588	0.041245
wt_h3k27ac.q.05_peak_5585	wt_h3k27ac.q.05_peak_5585	-1.1863	2.49245	10.778	0.00102712	0.0412685
wt_h3k27ac.q.05_peak_79605	wt_h3k27ac.q.05_peak_79605	0.795936	3.72706	10.7702	0.00103146	0.0413961
wt_h3k27ac.q.05_peak_45069	wt_h3k27ac.q.05_peak_45069	0.566769	4.29266	10.77	0.0010316	0.0413961
wt_h3k27ac.q.05_peak_37745	wt_h3k27ac.q.05_peak_37745	0.811645	3.3311	10.7636	0.00103518	0.0414116
wt_h3k27ac.q.05_peak_54588	wt_h3k27ac.q.05_peak_54588	-0.562233	4.31665	10.7615	0.00103636	0.0414116
wt_h3k27ac.q.05_peak_966	wt_h3k27ac.q.05_peak_966	-1.15804	2.47538	10.7612	0.00103649	0.0414116
wt_h3k27ac.q.05_peak_33999	wt_h3k27ac.q.05_peak_33999	-1.46128	1.94107	10.7611	0.00103658	0.0414116
wt_h3k27ac.q.05_peak_41015	wt_h3k27ac.q.05_peak_41015	-1.46128	1.94107	10.7611	0.00103658	0.0414116
wt_h3k27ac.q.05_peak_7490	wt_h3k27ac.q.05_peak_7490	-1.46128	1.94107	10.7611	0.00103658	0.0414116
wt_h3k27ac.q.05_peak_10165	wt_h3k27ac.q.05_peak_10165	-1.46128	1.94106	10.761	0.00103659	0.0414116
wt_h3k27ac.q.05_peak_3800	wt_h3k27ac.q.05_peak_3800	-0.48035	4.75189	10.7589	0.00103778	0.0414331
wt_h3k27ac.q.05_peak_43537	wt_h3k27ac.q.05_peak_43537	-0.758924	3.50933	10.7548	0.0010401	0.041498
wt_h3k27ac.q.05_peak_38706	wt_h3k27ac.q.05_peak_38706	0.644717	4.238	10.7536	0.00104078	0.041498
wt_h3k27ac.q.05_peak_5261	wt_h3k27ac.q.05_peak_5261	0.433402	5.2406	10.7525	0.00104138	0.041498
wt_h3k27ac.q.05_peak_75525	wt_h3k27ac.q.05_peak_75525	-1.27726	2.36849	10.7502	0.00104269	0.0415107
wt_h3k27ac.q.05_peak_66498	wt_h3k27ac.q.05_peak_66498	-1.87019	2.75552	10.7496	0.00104302	0.0415107
wt_h3k27ac.q.05_peak_25262	wt_h3k27ac.q.05_peak_25262	0.63462	4.11111	10.7441	0.00104613	0.0415937
wt_h3k27ac.q.05_peak_75730	wt_h3k27ac.q.05_peak_75730	0.88148	3.11661	10.7431	0.00104669	0.0415937
wt_h3k27ac.q.05_peak_13023	wt_h3k27ac.q.05_peak_13023	0.328397	5.82471	10.7417	0.0010475	0.0415937
wt_h3k27ac.q.05_peak_35662	wt_h3k27ac.q.05_peak_35662	0.83239	3.26307	10.7412	0.00104774	0.0415937
wt_h3k27ac.q.05_peak_69706	wt_h3k27ac.q.05_peak_69706	-1.30678	2.72689	10.7383	0.0010494	0.0416333
wt_h3k27ac.q.05_peak_38355	wt_h3k27ac.q.05_peak_38355	-1.02657	2.74129	10.7365	0.00105043	0.0416483
wt_h3k27ac.q.05_peak_14899	wt_h3k27ac.q.05_peak_14899	-0.775651	3.44941	10.7321	0.00105294	0.0417214
wt_h3k27ac.q.05_peak_67980	wt_h3k27ac.q.05_peak_67980	-1.07663	2.72695	10.7278	0.00105537	0.0417851
wt_h3k27ac.q.05_peak_66863	wt_h3k27ac.q.05_peak_66863	-2.02201	1.96575	10.7233	0.00105796	0.0417851
wt_h3k27ac.q.05_peak_38545	wt_h3k27ac.q.05_peak_38545	-0.814327	3.3215	10.7206	0.00105951	0.0417851
wt_h3k27ac.q.05_peak_77471	wt_h3k27ac.q.05_peak_77471	-0.814326	3.32149	10.7205	0.00105952	0.0417851
wt_h3k27ac.q.05_peak_20475	wt_h3k27ac.q.05_peak_20475	-0.814326	3.32149	10.7205	0.00105953	0.0417851
wt_h3k27ac.q.05_peak_58788	wt_h3k27ac.q.05_peak_58788	0.69643	4.0605	10.7204	0.0010596	0.0417851
wt_h3k27ac.q.05_peak_60022	wt_h3k27ac.q.05_peak_60022	-0.794031	3.38687	10.7201	0.0010598	0.0417851
wt_h3k27ac.q.05_peak_78206	wt_h3k27ac.q.05_peak_78206	-0.794028	3.38684	10.72	0.00105985	0.0417851
wt_h3k27ac.q.05_peak_81337	wt_h3k27ac.q.05_peak_81337	0.738524	4.18656	10.7184	0.00106074	0.0417912
wt_h3k27ac.q.05_peak_78716	wt_h3k27ac.q.05_peak_78716	-0.97904	2.87747	10.7174	0.00106133	0.0417912
wt_h3k27ac.q.05_peak_77687	wt_h3k27ac.q.05_peak_77687	0.489503	4.69056	10.7123	0.00106424	0.0418782
wt_h3k27ac.q.05_peak_12665	wt_h3k27ac.q.05_peak_12665	0.574442	4.24814	10.711	0.00106503	0.0418782
wt_h3k27ac.q.05_peak_56439	wt_h3k27ac.q.05_peak_56439	-0.647065	4.03142	10.7101	0.00106553	0.0418782
wt_h3k27ac.q.05_peak_71480	wt_h3k27ac.q.05_peak_71480	-0.579278	4.2277	10.7065	0.0010676	0.0418849
wt_h3k27ac.q.05_peak_65637	wt_h3k27ac.q.05_peak_65637	0.387135	5.35004	10.7063	0.00106773	0.0418849
wt_h3k27ac.q.05_peak_69718	wt_h3k27ac.q.05_peak_69718	0.451902	4.91293	10.7039	0.00106908	0.0418849
wt_h3k27ac.q.05_peak_9909	wt_h3k27ac.q.05_peak_9909	-1.27348	2.23284	10.7029	0.00106967	0.0418849
wt_h3k27ac.q.05_peak_72279	wt_h3k27ac.q.05_peak_72279	-1.27348	2.23285	10.7029	0.00106967	0.0418849
wt_h3k27ac.q.05_peak_74112	wt_h3k27ac.q.05_peak_74112	-1.27348	2.23284	10.7029	0.00106968	0.0418849
wt_h3k27ac.q.05_peak_12509	wt_h3k27ac.q.05_peak_12509	0.316934	6.19565	10.6995	0.00107162	0.0419347
wt_h3k27ac.q.05_peak_20819	wt_h3k27ac.q.05_peak_20819	-0.720848	3.63767	10.697	0.00107311	0.0419672
wt_h3k27ac.q.05_peak_23906	wt_h3k27ac.q.05_peak_23906	1.02806	2.72703	10.6905	0.00107688	0.0420886
wt_h3k27ac.q.05_peak_79944	wt_h3k27ac.q.05_peak_79944	-0.689281	3.75551	10.6879	0.00107841	0.0421001
wt_h3k27ac.q.05_peak_82020	wt_h3k27ac.q.05_peak_82020	0.498668	4.81453	10.6877	0.00107852	0.0421001
wt_h3k27ac.q.05_peak_13394	wt_h3k27ac.q.05_peak_13394	-0.539856	4.41845	10.6855	0.00107978	0.0421234
wt_h3k27ac.q.05_peak_16059	wt_h3k27ac.q.05_peak_16059	-1.07878	3.01381	10.674	0.00108652	0.0422505
wt_h3k27ac.q.05_peak_72467	wt_h3k27ac.q.05_peak_72467	-1.05478	2.66806	10.6735	0.00108684	0.0422505
wt_h3k27ac.q.05_peak_14199	wt_h3k27ac.q.05_peak_14199	-1.05478	2.66805	10.6734	0.00108685	0.0422505
wt_h3k27ac.q.05_peak_13914	wt_h3k27ac.q.05_peak_13914	-1.05478	2.66803	10.6734	0.00108689	0.0422505
wt_h3k27ac.q.05_peak_41110	wt_h3k27ac.q.05_peak_41110	-1.05478	2.66802	10.6734	0.00108689	0.0422505
wt_h3k27ac.q.05_peak_52760	wt_h3k27ac.q.05_peak_52760	-0.958046	2.90327	10.6721	0.00108761	0.0422505
wt_h3k27ac.q.05_peak_25589	wt_h3k27ac.q.05_peak_25589	-0.634001	3.97785	10.6719	0.00108772	0.0422505
wt_h3k27ac.q.05_peak_17089	wt_h3k27ac.q.05_peak_17089	0.633045	3.97802	10.668	0.00109007	0.0423154
wt_h3k27ac.q.05_peak_8148	wt_h3k27ac.q.05_peak_8148	-0.609643	4.08304	10.6648	0.00109196	0.0423629
wt_h3k27ac.q.05_peak_3288	wt_h3k27ac.q.05_peak_3288	-0.903038	3.88399	10.6626	0.00109322	0.0423857
wt_h3k27ac.q.05_peak_81986	wt_h3k27ac.q.05_peak_81986	-1.58121	2.19163	10.6585	0.00109566	0.0424542
wt_h3k27ac.q.05_peak_52223	wt_h3k27ac.q.05_peak_52223	-1.54282	1.98997	10.6436	0.00110451	0.0427709
wt_h3k27ac.q.05_peak_42723	wt_h3k27ac.q.05_peak_42723	-0.671892	3.81776	10.6412	0.00110593	0.0427996
wt_h3k27ac.q.05_peak_65346	wt_h3k27ac.q.05_peak_65346	-1.15811	2.47542	10.6384	0.00110764	0.0428295
wt_h3k27ac.q.05_peak_44882	wt_h3k27ac.q.05_peak_44882	0.674231	3.80432	10.637	0.00110847	0.0428295
wt_h3k27ac.q.05_peak_8907	wt_h3k27ac.q.05_peak_8907	-0.343557	5.68289	10.6366	0.00110874	0.0428295
wt_h3k27ac.q.05_peak_30762	wt_h3k27ac.q.05_peak_30762	-1.21497	2.33103	10.6319	0.00111152	0.0428847
wt_h3k27ac.q.05_peak_15051	wt_h3k27ac.q.05_peak_15051	-1.21497	2.33102	10.6319	0.00111153	0.0428847
wt_h3k27ac.q.05_peak_7755	wt_h3k27ac.q.05_peak_7755	-0.874352	3.12745	10.6278	0.001114	0.042889
wt_h3k27ac.q.05_peak_25124	wt_h3k27ac.q.05_peak_25124	-1.08676	2.59089	10.6273	0.00111433	0.042889
wt_h3k27ac.q.05_peak_5722	wt_h3k27ac.q.05_peak_5722	-1.08676	2.59088	10.6272	0.00111435	0.042889
wt_h3k27ac.q.05_peak_9104	wt_h3k27ac.q.05_peak_9104	-1.08676	2.59087	10.6272	0.00111436	0.042889
wt_h3k27ac.q.05_peak_41489	wt_h3k27ac.q.05_peak_41489	-1.17827	2.5425	10.6214	0.00111785	0.0429969
wt_h3k27ac.q.05_peak_9307	wt_h3k27ac.q.05_peak_9307	-0.74899	3.52602	10.6139	0.0011224	0.0431205
wt_h3k27ac.q.05_peak_38858	wt_h3k27ac.q.05_peak_38858	-0.748988	3.526	10.6139	0.00112243	0.0431205
wt_h3k27ac.q.05_peak_2157	wt_h3k27ac.q.05_peak_2157	0.215287	7.03603	10.6101	0.00112474	0.0431668
wt_h3k27ac.q.05_peak_63020	wt_h3k27ac.q.05_peak_63020	-0.656035	3.87746	10.6076	0.00112623	0.0431668
wt_h3k27ac.q.05_peak_62812	wt_h3k27ac.q.05_peak_62812	-1.12333	2.50933	10.6015	0.00112999	0.0431668
wt_h3k27ac.q.05_peak_905	wt_h3k27ac.q.05_peak_905	-1.16559	2.42294	10.601	0.00113027	0.0431668
wt_h3k27ac.q.05_peak_70192	wt_h3k27ac.q.05_peak_70192	-1.16559	2.42294	10.601	0.00113028	0.0431668
wt_h3k27ac.q.05_peak_80675	wt_h3k27ac.q.05_peak_80675	-1.16559	2.42294	10.601	0.00113028	0.0431668
wt_h3k27ac.q.05_peak_72186	wt_h3k27ac.q.05_peak_72186	-1.16559	2.42294	10.601	0.00113029	0.0431668
wt_h3k27ac.q.05_peak_46628	wt_h3k27ac.q.05_peak_46628	-1.16559	2.42293	10.6009	0.0011303	0.0431668
wt_h3k27ac.q.05_peak_70715	wt_h3k27ac.q.05_peak_70715	-1.16558	2.42293	10.6009	0.0011303	0.0431668
wt_h3k27ac.q.05_peak_69112	wt_h3k27ac.q.05_peak_69112	-1.72974	2.10548	10.6007	0.00113048	0.0431668
wt_h3k27ac.q.05_peak_16528	wt_h3k27ac.q.05_peak_16528	0.383478	5.45178	10.5943	0.00113439	0.0432901
wt_h3k27ac.q.05_peak_56084	wt_h3k27ac.q.05_peak_56084	0.720178	3.62232	10.5886	0.0011379	0.0433977
wt_h3k27ac.q.05_peak_47962	wt_h3k27ac.q.05_peak_47962	-0.64151	3.93479	10.5852	0.00114	0.0434264
wt_h3k27ac.q.05_peak_38910	wt_h3k27ac.q.05_peak_38910	-0.765024	3.4668	10.5851	0.00114003	0.0434264
wt_h3k27ac.q.05_peak_73102	wt_h3k27ac.q.05_peak_73102	-0.794139	4.08866	10.5791	0.00114375	0.043535
wt_h3k27ac.q.05_peak_31281	wt_h3k27ac.q.05_peak_31281	0.342143	5.68501	10.5782	0.00114426	0.043535
wt_h3k27ac.q.05_peak_66160	wt_h3k27ac.q.05_peak_66160	-1.25274	2.47542	10.5713	0.00114856	0.0436722
wt_h3k27ac.q.05_peak_4437	wt_h3k27ac.q.05_peak_4437	-0.920529	2.98997	10.5675	0.00115095	0.0436843
wt_h3k27ac.q.05_peak_37144	wt_h3k27ac.q.05_peak_37144	-0.782616	3.40499	10.5662	0.00115176	0.0436843
wt_h3k27ac.q.05_peak_30541	wt_h3k27ac.q.05_peak_30541	0.841693	3.21245	10.566	0.00115186	0.0436843
wt_h3k27ac.q.05_peak_65147	wt_h3k27ac.q.05_peak_65147	0.866356	3.13849	10.5653	0.00115233	0.0436843
wt_h3k27ac.q.05_peak_6397	wt_h3k27ac.q.05_peak_6397	-0.823517	3.2729	10.5652	0.00115234	0.0436843
wt_h3k27ac.q.05_peak_40712	wt_h3k27ac.q.05_peak_40712	0.535159	4.42308	10.5601	0.00115557	0.0437805
wt_h3k27ac.q.05_peak_39751	wt_h3k27ac.q.05_peak_39751	0.367492	5.8614	10.5576	0.0011571	0.0438122
wt_h3k27ac.q.05_peak_56438	wt_h3k27ac.q.05_peak_56438	-1.36583	2.06038	10.543	0.00116626	0.0441327
wt_h3k27ac.q.05_peak_55070	wt_h3k27ac.q.05_peak_55070	0.667448	3.81791	10.5332	0.00117251	0.0443406
wt_h3k27ac.q.05_peak_61375	wt_h3k27ac.q.05_peak_61375	-0.676527	4.04878	10.5321	0.00117316	0.0443406
wt_h3k27ac.q.05_peak_72775	wt_h3k27ac.q.05_peak_72775	0.375616	5.41188	10.5288	0.0011753	0.0443766
wt_h3k27ac.q.05_peak_12462	wt_h3k27ac.q.05_peak_12462	0.412849	5.14395	10.5284	0.00117553	0.0443766
wt_h3k27ac.q.05_peak_15211	wt_h3k27ac.q.05_peak_15211	0.586856	4.16534	10.5261	0.00117701	0.0444062
wt_h3k27ac.q.05_peak_3499	wt_h3k27ac.q.05_peak_3499	0.385396	5.3383	10.5243	0.00117814	0.044422
wt_h3k27ac.q.05_peak_59904	wt_h3k27ac.q.05_peak_59904	-0.416252	5.12194	10.5209	0.00118031	0.0444348
wt_h3k27ac.q.05_peak_23847	wt_h3k27ac.q.05_peak_23847	-1.44132	2.10547	10.5197	0.00118106	0.0444348
wt_h3k27ac.q.05_peak_72855	wt_h3k27ac.q.05_peak_72855	0.430781	5.02282	10.5196	0.00118115	0.0444348
wt_h3k27ac.q.05_peak_78626	wt_h3k27ac.q.05_peak_78626	-0.725232	3.59876	10.5194	0.00118129	0.0444348
wt_h3k27ac.q.05_peak_71745	wt_h3k27ac.q.05_peak_71745	-1.49639	1.86445	10.5141	0.00118469	0.0445029
wt_h3k27ac.q.05_peak_16010	wt_h3k27ac.q.05_peak_16010	-1.27352	2.23285	10.5136	0.00118499	0.0445029
wt_h3k27ac.q.05_peak_7043	wt_h3k27ac.q.05_peak_7043	-1.41271	2.38683	10.5132	0.00118522	0.0445029
wt_h3k27ac.q.05_peak_78840	wt_h3k27ac.q.05_peak_78840	0.893478	3.24303	10.5086	0.00118819	0.0445878
wt_h3k27ac.q.05_peak_81223	wt_h3k27ac.q.05_peak_81223	-0.692429	3.71967	10.5051	0.00119044	0.0446458
wt_h3k27ac.q.05_peak_24642	wt_h3k27ac.q.05_peak_24642	-0.649525	3.89044	10.5015	0.00119279	0.0447072
wt_h3k27ac.q.05_peak_48676	wt_h3k27ac.q.05_peak_48676	0.479471	4.71985	10.4989	0.00119448	0.044744
wt_h3k27ac.q.05_peak_52546	wt_h3k27ac.q.05_peak_52546	0.417411	5.1084	10.4951	0.00119695	0.044805
wt_h3k27ac.q.05_peak_19678	wt_h3k27ac.q.05_peak_19678	-0.386109	5.33094	10.4942	0.00119753	0.044805
wt_h3k27ac.q.05_peak_47839	wt_h3k27ac.q.05_peak_47839	-1.27717	2.36848	10.491	0.00119955	0.0448542
wt_h3k27ac.q.05_peak_40265	wt_h3k27ac.q.05_peak_40265	-0.862034	3.18112	10.4875	0.00120187	0.0449113
wt_h3k27ac.q.05_peak_37183	wt_h3k27ac.q.05_peak_37183	-1.00197	2.7696	10.484	0.00120414	0.0449113
wt_h3k27ac.q.05_peak_58129	wt_h3k27ac.q.05_peak_58129	-1.00197	2.76956	10.4839	0.0012042	0.0449113
wt_h3k27ac.q.05_peak_2456	wt_h3k27ac.q.05_peak_2456	-1.00197	2.76956	10.4839	0.0012042	0.0449113
wt_h3k27ac.q.05_peak_45760	wt_h3k27ac.q.05_peak_45760	0.624468	6.00509	10.4824	0.00120514	0.0449113
wt_h3k27ac.q.05_peak_43890	wt_h3k27ac.q.05_peak_43890	0.942293	2.91606	10.4821	0.00120535	0.0449113
wt_h3k27ac.q.05_peak_78643	wt_h3k27ac.q.05_peak_78643	0.596039	4.11663	10.478	0.00120806	0.0449855
wt_h3k27ac.q.05_peak_53805	wt_h3k27ac.q.05_peak_53805	1.00452	2.83804	10.4736	0.0012109	0.0450648
wt_h3k27ac.q.05_peak_70337	wt_h3k27ac.q.05_peak_70337	-1.1286	2.71246	10.4722	0.00121184	0.0450728
wt_h3k27ac.q.05_peak_14052	wt_h3k27ac.q.05_peak_14052	0.274429	6.30608	10.4711	0.00121255	0.0450728
wt_h3k27ac.q.05_peak_28017	wt_h3k27ac.q.05_peak_28017	-1.61163	2.29255	10.4626	0.00121814	0.045254
wt_h3k27ac.q.05_peak_69853	wt_h3k27ac.q.05_peak_69853	-1.09683	2.78354	10.4598	0.00122002	0.0452895
wt_h3k27ac.q.05_peak_34624	wt_h3k27ac.q.05_peak_34624	-1.43064	2.01382	10.4579	0.00122126	0.0452895
wt_h3k27ac.q.05_peak_37557	wt_h3k27ac.q.05_peak_37557	0.359434	5.56308	10.457	0.00122187	0.0452895
wt_h3k27ac.q.05_peak_52754	wt_h3k27ac.q.05_peak_52754	0.271405	6.33591	10.4545	0.0012235	0.0452895
wt_h3k27ac.q.05_peak_13674	wt_h3k27ac.q.05_peak_13674	0.312438	5.92871	10.4544	0.00122359	0.0452895
wt_h3k27ac.q.05_peak_12250	wt_h3k27ac.q.05_peak_12250	-0.546383	4.35448	10.453	0.00122453	0.0452895
wt_h3k27ac.q.05_peak_54641	wt_h3k27ac.q.05_peak_54641	-0.937928	2.92856	10.451	0.00122583	0.0452895
wt_h3k27ac.q.05_peak_15998	wt_h3k27ac.q.05_peak_15998	-0.937927	2.92856	10.451	0.00122584	0.0452895
wt_h3k27ac.q.05_peak_75195	wt_h3k27ac.q.05_peak_75195	1.02467	3.07185	10.4503	0.00122632	0.0452895
wt_h3k27ac.q.05_peak_43186	wt_h3k27ac.q.05_peak_43186	-1.39234	2.23282	10.4494	0.00122687	0.0452895
wt_h3k27ac.q.05_peak_68953	wt_h3k27ac.q.05_peak_68953	1.00386	2.75561	10.4493	0.00122699	0.0452895
wt_h3k27ac.q.05_peak_70090	wt_h3k27ac.q.05_peak_70090	-0.404391	5.31897	10.4465	0.00122882	0.0453215
wt_h3k27ac.q.05_peak_2090	wt_h3k27ac.q.05_peak_2090	-0.480594	4.70871	10.4458	0.00122929	0.0453215
wt_h3k27ac.q.05_peak_33934	wt_h3k27ac.q.05_peak_33934	-0.858993	3.14916	10.4425	0.00123147	0.0453496
wt_h3k27ac.q.05_peak_25451	wt_h3k27ac.q.05_peak_25451	-0.858992	3.14915	10.4425	0.00123149	0.0453496
wt_h3k27ac.q.05_peak_47546	wt_h3k27ac.q.05_peak_47546	0.646738	3.89056	10.4412	0.00123233	0.0453539
wt_h3k27ac.q.05_peak_46959	wt_h3k27ac.q.05_peak_46959	0.605922	4.06618	10.4353	0.00123631	0.0454738
wt_h3k27ac.q.05_peak_11236	wt_h3k27ac.q.05_peak_11236	-1.421	2.45808	10.4262	0.00124243	0.0456725
wt_h3k27ac.q.05_peak_50470	wt_h3k27ac.q.05_peak_50470	-1.00055	2.89042	10.4229	0.00124465	0.0457273
wt_h3k27ac.q.05_peak_45298	wt_h3k27ac.q.05_peak_45298	0.537628	4.39159	10.4193	0.00124703	0.0457881
wt_h3k27ac.q.05_peak_66454	wt_h3k27ac.q.05_peak_66454	0.330705	5.82978	10.4155	0.00124965	0.0458119
wt_h3k27ac.q.05_peak_76867	wt_h3k27ac.q.05_peak_76867	-0.281081	6.23023	10.4152	0.0012498	0.0458119
wt_h3k27ac.q.05_peak_2218	wt_h3k27ac.q.05_peak_2218	-0.833436	3.22264	10.4128	0.00125145	0.0458119
wt_h3k27ac.q.05_peak_55941	wt_h3k27ac.q.05_peak_55941	-0.833433	3.22261	10.4127	0.0012515	0.0458119
wt_h3k27ac.q.05_peak_66413	wt_h3k27ac.q.05_peak_66413	0.432625	4.9961	10.4117	0.0012522	0.0458119
wt_h3k27ac.q.05_peak_16369	wt_h3k27ac.q.05_peak_16369	1.17027	2.57504	10.4104	0.00125307	0.0458119
wt_h3k27ac.q.05_peak_6216	wt_h3k27ac.q.05_peak_6216	0.417036	5.44518	10.4086	0.00125427	0.0458119
wt_h3k27ac.q.05_peak_76680	wt_h3k27ac.q.05_peak_76680	-1.02794	2.69779	10.4073	0.00125515	0.0458119
wt_h3k27ac.q.05_peak_80373	wt_h3k27ac.q.05_peak_80373	-1.02794	2.69779	10.4073	0.00125516	0.0458119
wt_h3k27ac.q.05_peak_59972	wt_h3k27ac.q.05_peak_59972	0.828324	3.23292	10.4039	0.00125752	0.0458119
wt_h3k27ac.q.05_peak_74900	wt_h3k27ac.q.05_peak_74900	0.482944	4.68682	10.4037	0.00125766	0.0458119
wt_h3k27ac.q.05_peak_56476	wt_h3k27ac.q.05_peak_56476	-1.28926	2.17056	10.4034	0.00125782	0.0458119
wt_h3k27ac.q.05_peak_3990	wt_h3k27ac.q.05_peak_3990	-1.28926	2.17055	10.4034	0.00125783	0.0458119
wt_h3k27ac.q.05_peak_55170	wt_h3k27ac.q.05_peak_55170	-1.28926	2.17054	10.4034	0.00125785	0.0458119
wt_h3k27ac.q.05_peak_57930	wt_h3k27ac.q.05_peak_57930	-0.790078	3.35917	10.4021	0.00125871	0.0458168
wt_h3k27ac.q.05_peak_2721	wt_h3k27ac.q.05_peak_2721	-1.215	2.33103	10.3977	0.00126176	0.0459013
wt_h3k27ac.q.05_peak_45352	wt_h3k27ac.q.05_peak_45352	0.372035	5.80264	10.3941	0.00126419	0.0459632
wt_h3k27ac.q.05_peak_60375	wt_h3k27ac.q.05_peak_60375	0.673634	4.75207	10.3797	0.00127411	0.0462975
wt_h3k27ac.q.05_peak_36981	wt_h3k27ac.q.05_peak_36981	0.761084	3.4495	10.3783	0.00127502	0.0463038
wt_h3k27ac.q.05_peak_7672	wt_h3k27ac.q.05_peak_7672	0.197438	7.25882	10.3722	0.00127924	0.0464304
wt_h3k27ac.q.05_peak_66371	wt_h3k27ac.q.05_peak_66371	0.565624	4.96284	10.3705	0.00128044	0.0464471
wt_h3k27ac.q.05_peak_38023	wt_h3k27ac.q.05_peak_38023	-1.18663	2.4925	10.3693	0.00128129	0.046451
wt_h3k27ac.q.05_peak_1330	wt_h3k27ac.q.05_peak_1330	-1.75758	1.916	10.3655	0.0012839	0.0465112
wt_h3k27ac.q.05_peak_27065	wt_h3k27ac.q.05_peak_27065	-1.29165	2.31192	10.3648	0.00128442	0.0465112
wt_h3k27ac.q.05_peak_22832	wt_h3k27ac.q.05_peak_22832	-1.95077	2.14914	10.3593	0.00128825	0.046623
wt_h3k27ac.q.05_peak_24837	wt_h3k27ac.q.05_peak_24837	0.612123	4.37785	10.3534	0.00129239	0.0466773
wt_h3k27ac.q.05_peak_37143	wt_h3k27ac.q.05_peak_37143	0.652935	3.87765	10.3527	0.00129289	0.0466773
wt_h3k27ac.q.05_peak_77516	wt_h3k27ac.q.05_peak_77516	0.505892	4.55082	10.3526	0.0012929	0.0466773
wt_h3k27ac.q.05_peak_14729	wt_h3k27ac.q.05_peak_14729	-0.86201	3.1811	10.3525	0.00129301	0.0466773
wt_h3k27ac.q.05_peak_73302	wt_h3k27ac.q.05_peak_73302	0.600921	4.07753	10.3516	0.00129361	0.0466773
wt_h3k27ac.q.05_peak_130	wt_h3k27ac.q.05_peak_130	0.480423	4.69425	10.3508	0.00129419	0.0466773
wt_h3k27ac.q.05_peak_36899	wt_h3k27ac.q.05_peak_36899	-1.05728	2.62224	10.3454	0.00129795	0.0467597
wt_h3k27ac.q.05_peak_66576	wt_h3k27ac.q.05_peak_66576	-1.05728	2.62224	10.3454	0.00129795	0.0467597
wt_h3k27ac.q.05_peak_33170	wt_h3k27ac.q.05_peak_33170	-0.957167	2.86444	10.3424	0.00130008	0.046788
wt_h3k27ac.q.05_peak_32781	wt_h3k27ac.q.05_peak_32781	1.45612	2.01389	10.3422	0.00130022	0.046788
wt_h3k27ac.q.05_peak_66536	wt_h3k27ac.q.05_peak_66536	0.318322	6.89228	10.341	0.00130107	0.0467917
wt_h3k27ac.q.05_peak_66219	wt_h3k27ac.q.05_peak_66219	0.439658	5.2022	10.3277	0.00131049	0.0471036
wt_h3k27ac.q.05_peak_61176	wt_h3k27ac.q.05_peak_61176	-1.22639	2.27292	10.3214	0.00131494	0.0472103
wt_h3k27ac.q.05_peak_49548	wt_h3k27ac.q.05_peak_49548	-1.22639	2.27291	10.3214	0.00131495	0.0472103
wt_h3k27ac.q.05_peak_56929	wt_h3k27ac.q.05_peak_56929	-1.13915	2.62226	10.3071	0.00132519	0.0475509
wt_h3k27ac.q.05_peak_25074	wt_h3k27ac.q.05_peak_25074	-0.871519	3.09432	10.3019	0.00132894	0.0476201
wt_h3k27ac.q.05_peak_35811	wt_h3k27ac.q.05_peak_35811	-1.09071	2.54252	10.3013	0.00132938	0.0476201
wt_h3k27ac.q.05_peak_41041	wt_h3k27ac.q.05_peak_41041	-1.09071	2.54252	10.3013	0.00132939	0.0476201
wt_h3k27ac.q.05_peak_68558	wt_h3k27ac.q.05_peak_68558	0.376808	5.37099	10.2965	0.00133282	0.0477162
wt_h3k27ac.q.05_peak_19322	wt_h3k27ac.q.05_peak_19322	-0.599889	4.07741	10.2917	0.00133632	0.0478143
wt_h3k27ac.q.05_peak_43491	wt_h3k27ac.q.05_peak_43491	0.53071	4.40962	10.2891	0.00133818	0.0478534
wt_h3k27ac.q.05_peak_70332	wt_h3k27ac.q.05_peak_70332	-1.1738	2.36848	10.2831	0.00134252	0.0479547
wt_h3k27ac.q.05_peak_36487	wt_h3k27ac.q.05_peak_36487	-1.1738	2.36848	10.2831	0.00134253	0.0479547
wt_h3k27ac.q.05_peak_10670	wt_h3k27ac.q.05_peak_10670	-1.12914	2.45814	10.2788	0.00134567	0.0479598
wt_h3k27ac.q.05_peak_6172	wt_h3k27ac.q.05_peak_6172	-1.12914	2.45814	10.2788	0.00134568	0.0479598
wt_h3k27ac.q.05_peak_49616	wt_h3k27ac.q.05_peak_49616	-1.12913	2.45812	10.2788	0.00134571	0.0479598
wt_h3k27ac.q.05_peak_53016	wt_h3k27ac.q.05_peak_53016	-1.12913	2.45811	10.2788	0.00134571	0.0479598
wt_h3k27ac.q.05_peak_1947	wt_h3k27ac.q.05_peak_1947	-0.760759	3.44063	10.2712	0.0013512	0.0480977
wt_h3k27ac.q.05_peak_7704	wt_h3k27ac.q.05_peak_7704	-0.760758	3.44062	10.2712	0.00135122	0.0480977
wt_h3k27ac.q.05_peak_45076	wt_h3k27ac.q.05_peak_45076	-0.566027	4.23281	10.2691	0.00135279	0.0480977
wt_h3k27ac.q.05_peak_409	wt_h3k27ac.q.05_peak_409	0.402292	5.18125	10.267	0.00135434	0.0480977
wt_h3k27ac.q.05_peak_73435	wt_h3k27ac.q.05_peak_73435	-1.39053	1.98999	10.2662	0.00135489	0.0480977
wt_h3k27ac.q.05_peak_58263	wt_h3k27ac.q.05_peak_58263	-1.39053	1.98999	10.2662	0.0013549	0.0480977
wt_h3k27ac.q.05_peak_5665	wt_h3k27ac.q.05_peak_5665	-1.39053	1.98997	10.2662	0.00135492	0.0480977
wt_h3k27ac.q.05_peak_44603	wt_h3k27ac.q.05_peak_44603	-0.84417	3.17053	10.2634	0.00135693	0.048142
wt_h3k27ac.q.05_peak_60081	wt_h3k27ac.q.05_peak_60081	1.05655	2.60675	10.2497	0.00136704	0.0484354
wt_h3k27ac.q.05_peak_9310	wt_h3k27ac.q.05_peak_9310	0.323583	5.79926	10.2483	0.00136813	0.0484354
wt_h3k27ac.q.05_peak_27822	wt_h3k27ac.q.05_peak_27822	0.815388	3.25312	10.2468	0.00136923	0.0484354
wt_h3k27ac.q.05_peak_56293	wt_h3k27ac.q.05_peak_56293	0.48589	4.72344	10.2466	0.00136933	0.0484354
wt_h3k27ac.q.05_peak_60262	wt_h3k27ac.q.05_peak_60262	-0.978556	2.79735	10.243	0.00137208	0.0484354
wt_h3k27ac.q.05_peak_26891	wt_h3k27ac.q.05_peak_26891	-0.978555	2.79734	10.2429	0.0013721	0.0484354
wt_h3k27ac.q.05_peak_42279	wt_h3k27ac.q.05_peak_42279	-0.978555	2.79734	10.2429	0.0013721	0.0484354
wt_h3k27ac.q.05_peak_4235	wt_h3k27ac.q.05_peak_4235	-0.978552	2.79731	10.2429	0.00137214	0.0484354
wt_h3k27ac.q.05_peak_61660	wt_h3k27ac.q.05_peak_61660	-0.574938	4.18636	10.2415	0.00137317	0.0484354
wt_h3k27ac.q.05_peak_43343	wt_h3k27ac.q.05_peak_43343	-0.798091	3.31189	10.2401	0.00137421	0.0484354
wt_h3k27ac.q.05_peak_10030	wt_h3k27ac.q.05_peak_10030	-0.918657	2.95346	10.2388	0.00137515	0.0484354
wt_h3k27ac.q.05_peak_35826	wt_h3k27ac.q.05_peak_35826	-0.918656	2.95344	10.2388	0.00137517	0.0484354
wt_h3k27ac.q.05_peak_62533	wt_h3k27ac.q.05_peak_62533	-0.918655	2.95343	10.2388	0.00137518	0.0484354
wt_h3k27ac.q.05_peak_25	wt_h3k27ac.q.05_peak_25	-0.660248	3.81098	10.2346	0.00137833	0.0485192
wt_h3k27ac.q.05_peak_67740	wt_h3k27ac.q.05_peak_67740	0.83768	3.18121	10.2275	0.0013836	0.0486777
wt_h3k27ac.q.05_peak_80540	wt_h3k27ac.q.05_peak_80540	0.606088	4.03743	10.2264	0.00138442	0.0486793
wt_h3k27ac.q.05_peak_19628	wt_h3k27ac.q.05_peak_19628	0.305579	6.50964	10.2233	0.00138677	0.0487347
wt_h3k27ac.q.05_peak_49380	wt_h3k27ac.q.05_peak_49380	0.311989	5.9002	10.2209	0.00138856	0.0487705
wt_h3k27ac.q.05_peak_25626	wt_h3k27ac.q.05_peak_25626	0.980834	2.78361	10.2192	0.00138988	0.0487897
wt_h3k27ac.q.05_peak_69089	wt_h3k27ac.q.05_peak_69089	-1.05108	3.17055	10.2176	0.00139105	0.0488036
wt_h3k27ac.q.05_peak_59508	wt_h3k27ac.q.05_peak_59508	0.688766	4.02572	10.2125	0.00139493	0.0489123
wt_h3k27ac.q.05_peak_35779	wt_h3k27ac.q.05_peak_35779	-1.2519	2.47538	10.2113	0.00139584	0.0489173
wt_h3k27ac.q.05_peak_515	wt_h3k27ac.q.05_peak_515	-1.04655	2.83799	10.209	0.00139755	0.0489429
wt_h3k27ac.q.05_peak_22357	wt_h3k27ac.q.05_peak_22357	0.507523	4.52202	10.2073	0.00139883	0.0489429
wt_h3k27ac.q.05_peak_4687	wt_h3k27ac.q.05_peak_4687	-0.924034	3.06036	10.2072	0.0013989	0.0489429
wt_h3k27ac.q.05_peak_803	wt_h3k27ac.q.05_peak_803	0.972578	3.20214	10.204	0.00140138	0.0490024
wt_h3k27ac.q.05_peak_83052	wt_h3k27ac.q.05_peak_83052	-1.91765	2.12744	10.2003	0.00140416	0.0490723
wt_h3k27ac.q.05_peak_31762	wt_h3k27ac.q.05_peak_31762	-0.877594	3.3592	10.198	0.00140591	0.0491063
wt_h3k27ac.q.05_peak_10553	wt_h3k27ac.q.05_peak_10553	-0.605812	4.03724	10.1922	0.00141036	0.0492348
wt_h3k27ac.q.05_peak_45145	wt_h3k27ac.q.05_peak_45145	0.307591	5.93659	10.189	0.00141279	0.049292
wt_h3k27ac.q.05_peak_43992	wt_h3k27ac.q.05_peak_43992	0.0925336	9.60009	10.1803	0.00141949	0.0494985
wt_h3k27ac.q.05_peak_41726	wt_h3k27ac.q.05_peak_41726	0.562582	4.44952	10.178	0.00142127	0.0495331
wt_h3k27ac.q.05_peak_59399	wt_h3k27ac.q.05_peak_59399	0.44539	4.97503	10.1734	0.00142485	0.0496304
wt_h3k27ac.q.05_peak_12849	wt_h3k27ac.q.05_peak_12849	-0.408033	5.13013	10.1722	0.00142576	0.0496348
wt_h3k27ac.q.05_peak_70811	wt_h3k27ac.q.05_peak_70811	-1.39493	2.44066	10.1688	0.00142836	0.0496572
wt_h3k27ac.q.05_peak_3749	wt_h3k27ac.q.05_peak_3749	0.532302	4.59495	10.1673	0.00142953	0.0496572
wt_h3k27ac.q.05_peak_8472	wt_h3k27ac.q.05_peak_8472	-0.885188	3.03727	10.1658	0.00143073	0.0496572
wt_h3k27ac.q.05_peak_15546	wt_h3k27ac.q.05_peak_15546	-0.885188	3.03727	10.1658	0.00143073	0.0496572
wt_h3k27ac.q.05_peak_32129	wt_h3k27ac.q.05_peak_32129	-0.885187	3.03726	10.1657	0.00143075	0.0496572
wt_h3k27ac.q.05_peak_77757	wt_h3k27ac.q.05_peak_77757	-0.827644	3.43178	10.1653	0.00143112	0.0496572
wt_h3k27ac.q.05_peak_31173	wt_h3k27ac.q.05_peak_31173	0.577538	4.16002	10.1618	0.00143378	0.0497168
wt_h3k27ac.q.05_peak_71005	wt_h3k27ac.q.05_peak_71005	-0.531395	4.39137	10.161	0.00143442	0.0497168
wt_h3k27ac.q.05_peak_15479	wt_h3k27ac.q.05_peak_15479	-1.00248	2.72695	10.1542	0.00143973	0.0498467
wt_h3k27ac.q.05_peak_75671	wt_h3k27ac.q.05_peak_75671	-1.00248	2.72694	10.1542	0.00143975	0.0498467
wt_h3k27ac.q.05_peak_15718	wt_h3k27ac.q.05_peak_15718	-0.342315	5.62605	10.1513	0.00144198	0.0498967
wt_h3k27ac.q.05_peak_28724	wt_h3k27ac.q.05_peak_28724	0.565046	4.21761	10.1458	0.00144634	0.0499951
wt_h3k27ac.q.05_peak_12717	wt_h3k27ac.q.05_peak_12717	0.565043	4.21764	10.1457	0.00144641	0.0499951
wt_h3k27ac.q.05_peak_59079	wt_h3k27ac.q.05_peak_59079	-1.6582	2.06039	10.1425	0.00144888	0.050048
wt_h3k27ac.q.05_peak_49684	wt_h3k27ac.q.05_peak_49684	-0.699271	3.64531	10.1413	0.00144985	0.050048
wt_h3k27ac.q.05_peak_63352	wt_h3k27ac.q.05_peak_63352	-2.15235	2.57494	10.1373	0.00145302	0.050048
wt_h3k27ac.q.05_peak_16348	wt_h3k27ac.q.05_peak_16348	-0.920642	3.33101	10.1372	0.00145308	0.050048
wt_h3k27ac.q.05_peak_52843	wt_h3k27ac.q.05_peak_52843	0.356613	5.50532	10.1365	0.00145359	0.050048
wt_h3k27ac.q.05_peak_10617	wt_h3k27ac.q.05_peak_10617	0.940186	2.87759	10.1357	0.00145426	0.050048
wt_h3k27ac.q.05_peak_56120	wt_h3k27ac.q.05_peak_56120	0.940186	2.87758	10.1357	0.00145426	0.050048
wt_h3k27ac.q.05_peak_54973	wt_h3k27ac.q.05_peak_54973	-1.95833	2.34989	10.1346	0.00145513	0.050048
wt_h3k27ac.q.05_peak_41071	wt_h3k27ac.q.05_peak_41071	-0.5797	4.14914	10.1341	0.00145554	0.050048
wt_h3k27ac.q.05_peak_79110	wt_h3k27ac.q.05_peak_79110	0.249689	7.26263	10.1336	0.00145588	0.050048
wt_h3k27ac.q.05_peak_50429	wt_h3k27ac.q.05_peak_50429	-0.480855	4.66421	10.1326	0.0014567	0.0500492
wt_h3k27ac.q.05_peak_46281	wt_h3k27ac.q.05_peak_46281	-1.37879	2.66799	10.1307	0.00145822	0.0500741
wt_h3k27ac.q.05_peak_52266	wt_h3k27ac.q.05_peak_52266	-0.6893	3.75549	10.1271	0.00146109	0.0500994
wt_h3k27ac.q.05_peak_26514	wt_h3k27ac.q.05_peak_26514	0.346595	5.76095	10.1263	0.00146166	0.0500994
wt_h3k27ac.q.05_peak_9710	wt_h3k27ac.q.05_peak_9710	0.928299	3.88409	10.1262	0.00146178	0.0500994
wt_h3k27ac.q.05_peak_70381	wt_h3k27ac.q.05_peak_70381	0.655707	3.81112	10.1248	0.00146288	0.0500994
wt_h3k27ac.q.05_peak_61595	wt_h3k27ac.q.05_peak_61595	-1.49646	1.86447	10.1224	0.00146478	0.0500994
wt_h3k27ac.q.05_peak_67884	wt_h3k27ac.q.05_peak_67884	-0.936475	2.89045	10.1218	0.00146528	0.0500994
wt_h3k27ac.q.05_peak_15299	wt_h3k27ac.q.05_peak_15299	-0.936474	2.89045	10.1218	0.0014653	0.0500994
wt_h3k27ac.q.05_peak_26664	wt_h3k27ac.q.05_peak_26664	-0.936474	2.89044	10.1217	0.00146531	0.0500994
wt_h3k27ac.q.05_peak_2611	wt_h3k27ac.q.05_peak_2611	-0.589702	4.09986	10.1146	0.00147101	0.0502055
wt_h3k27ac.q.05_peak_78568	wt_h3k27ac.q.05_peak_78568	0.838727	3.42301	10.1135	0.00147191	0.0502055
wt_h3k27ac.q.05_peak_62387	wt_h3k27ac.q.05_peak_62387	-0.348241	5.57083	10.1078	0.0014764	0.0502055
wt_h3k27ac.q.05_peak_52357	wt_h3k27ac.q.05_peak_52357	-1.30689	2.10546	10.1075	0.0014767	0.0502055
wt_h3k27ac.q.05_peak_6813	wt_h3k27ac.q.05_peak_6813	-1.30689	2.10546	10.1075	0.0014767	0.0502055
wt_h3k27ac.q.05_peak_46454	wt_h3k27ac.q.05_peak_46454	-1.30689	2.10546	10.1075	0.0014767	0.0502055
wt_h3k27ac.q.05_peak_48721	wt_h3k27ac.q.05_peak_48721	-1.30689	2.10546	10.1075	0.0014767	0.0502055
wt_h3k27ac.q.05_peak_39784	wt_h3k27ac.q.05_peak_39784	-1.30689	2.10546	10.1075	0.0014767	0.0502055
wt_h3k27ac.q.05_peak_44755	wt_h3k27ac.q.05_peak_44755	-1.30689	2.10546	10.1075	0.00147671	0.0502055
wt_h3k27ac.q.05_peak_58328	wt_h3k27ac.q.05_peak_58328	-1.30689	2.10545	10.1074	0.00147672	0.0502055
wt_h3k27ac.q.05_peak_43866	wt_h3k27ac.q.05_peak_43866	1.17802	2.90335	10.1069	0.00147717	0.0502055
wt_h3k27ac.q.05_peak_71247	wt_h3k27ac.q.05_peak_71247	-0.76725	3.39596	10.1019	0.00148119	0.0502539
wt_h3k27ac.q.05_peak_6499	wt_h3k27ac.q.05_peak_6499	1.00355	2.71254	10.1014	0.00148154	0.0502539
wt_h3k27ac.q.05_peak_71246	wt_h3k27ac.q.05_peak_71246	-0.60047	4.04881	10.1011	0.00148177	0.0502539
wt_h3k27ac.q.05_peak_82471	wt_h3k27ac.q.05_peak_82471	-0.600469	4.04881	10.1011	0.00148178	0.0502539
wt_h3k27ac.q.05_peak_42288	wt_h3k27ac.q.05_peak_42288	-0.624708	3.94102	10.0962	0.00148572	0.0503603
wt_h3k27ac.q.05_peak_67112	wt_h3k27ac.q.05_peak_67112	-0.829855	3.19158	10.0903	0.00149054	0.0504702
wt_h3k27ac.q.05_peak_32774	wt_h3k27ac.q.05_peak_32774	-0.829854	3.19158	10.0902	0.00149056	0.0504702
wt_h3k27ac.q.05_peak_68605	wt_h3k27ac.q.05_peak_68605	-0.679978	3.7124	10.0875	0.0014928	0.0505191
wt_h3k27ac.q.05_peak_51531	wt_h3k27ac.q.05_peak_51531	-1.91094	2.0138	10.084	0.00149559	0.0505861
wt_h3k27ac.q.05_peak_23149	wt_h3k27ac.q.05_peak_23149	-0.806717	3.26299	10.0802	0.00149868	0.050637
wt_h3k27ac.q.05_peak_40279	wt_h3k27ac.q.05_peak_40279	-0.806716	3.26298	10.0802	0.0014987	0.050637
wt_h3k27ac.q.05_peak_3207	wt_h3k27ac.q.05_peak_3207	-1.02941	2.65294	10.0782	0.00150032	0.0506649
wt_h3k27ac.q.05_peak_17934	wt_h3k27ac.q.05_peak_17934	-0.914316	3.21235	10.0772	0.00150118	0.0506667
wt_h3k27ac.q.05_peak_32824	wt_h3k27ac.q.05_peak_32824	0.285312	6.13719	10.0746	0.00150326	0.0507096
wt_h3k27ac.q.05_peak_56203	wt_h3k27ac.q.05_peak_56203	0.266163	6.33833	10.0724	0.00150507	0.0507435
wt_h3k27ac.q.05_peak_27688	wt_h3k27ac.q.05_peak_27688	0.37808	5.3288	10.0649	0.00151119	0.0509227
wt_h3k27ac.q.05_peak_45033	wt_h3k27ac.q.05_peak_45033	0.595961	4.06049	10.0604	0.00151487	0.0510194
wt_h3k27ac.q.05_peak_56836	wt_h3k27ac.q.05_peak_56836	-0.92683	3.12743	10.0556	0.00151883	0.0511255
wt_h3k27ac.q.05_peak_32800	wt_h3k27ac.q.05_peak_32800	0.847831	3.12756	10.0539	0.00152022	0.0511452
wt_h3k27ac.q.05_peak_63136	wt_h3k27ac.q.05_peak_63136	-0.574991	4.15987	10.0505	0.00152305	0.0512131
wt_h3k27ac.q.05_peak_69077	wt_h3k27ac.q.05_peak_69077	0.538908	4.50947	10.0472	0.00152583	0.0512791
wt_h3k27ac.q.05_peak_30348	wt_h3k27ac.q.05_peak_30348	-1.46967	2.03727	10.0405	0.00153134	0.0514368
wt_h3k27ac.q.05_peak_68642	wt_h3k27ac.q.05_peak_68642	-0.219385	7.1961	10.0383	0.00153322	0.0514635
wt_h3k27ac.q.05_peak_17610	wt_h3k27ac.q.05_peak_17610	-1.21487	2.33099	10.0374	0.00153393	0.0514635
wt_h3k27ac.q.05_peak_80983	wt_h3k27ac.q.05_peak_80983	0.710756	3.87762	10.0362	0.00153492	0.0514635
wt_h3k27ac.q.05_peak_19425	wt_h3k27ac.q.05_peak_19425	-1.88432	2.10544	10.0356	0.0015354	0.0514635
wt_h3k27ac.q.05_peak_11733	wt_h3k27ac.q.05_peak_11733	0.581736	4.12213	10.0303	0.00153983	0.0515847
wt_h3k27ac.q.05_peak_52561	wt_h3k27ac.q.05_peak_52561	-0.58474	4.11099	10.0283	0.0015415	0.051598
wt_h3k27ac.q.05_peak_42859	wt_h3k27ac.q.05_peak_42859	-1.20468	2.38688	10.0263	0.00154321	0.051598
wt_h3k27ac.q.05_peak_81395	wt_h3k27ac.q.05_peak_81395	-1.20468	2.38688	10.0263	0.00154321	0.051598
wt_h3k27ac.q.05_peak_19405	wt_h3k27ac.q.05_peak_19405	-0.849975	3.51764	10.0257	0.00154373	0.051598
wt_h3k27ac.q.05_peak_15615	wt_h3k27ac.q.05_peak_15615	0.705403	4.31202	10.0242	0.00154501	0.051598
wt_h3k27ac.q.05_peak_44539	wt_h3k27ac.q.05_peak_44539	-1.34036	2.27293	10.022	0.0015468	0.051598
wt_h3k27ac.q.05_peak_68874	wt_h3k27ac.q.05_peak_68874	-0.646631	3.83796	10.0217	0.00154706	0.051598
wt_h3k27ac.q.05_peak_62937	wt_h3k27ac.q.05_peak_62937	-0.646628	3.83794	10.0216	0.00154715	0.051598
wt_h3k27ac.q.05_peak_23732	wt_h3k27ac.q.05_peak_23732	-0.691027	3.66049	10.0211	0.00154759	0.051598
wt_h3k27ac.q.05_peak_28490	wt_h3k27ac.q.05_peak_28490	-1.16547	2.42291	10.018	0.00155022	0.0516412
wt_h3k27ac.q.05_peak_63538	wt_h3k27ac.q.05_peak_63538	-1.05998	2.57492	10.0176	0.00155052	0.0516412
wt_h3k27ac.q.05_peak_20521	wt_h3k27ac.q.05_peak_20521	-1.23903	2.21238	10.013	0.00155438	0.0516884
wt_h3k27ac.q.05_peak_71641	wt_h3k27ac.q.05_peak_71641	-1.23903	2.21237	10.013	0.00155439	0.0516884
wt_h3k27ac.q.05_peak_11348	wt_h3k27ac.q.05_peak_11348	-1.23903	2.21237	10.013	0.0015544	0.0516884
wt_h3k27ac.q.05_peak_69843	wt_h3k27ac.q.05_peak_69843	-1.05254	2.71245	10.0102	0.00155678	0.0517405
wt_h3k27ac.q.05_peak_76088	wt_h3k27ac.q.05_peak_76088	-1.22195	2.62222	10.0088	0.00155794	0.0517515
wt_h3k27ac.q.05_peak_37201	wt_h3k27ac.q.05_peak_37201	-1.39362	2.4406	10.0055	0.00156076	0.0518179
wt_h3k27ac.q.05_peak_1910	wt_h3k27ac.q.05_peak_1910	-0.709589	3.80414	10.0035	0.00156245	0.0518453
wt_h3k27ac.q.05_peak_17055	wt_h3k27ac.q.05_peak_17055	-1.32288	2.331	9.99998	0.00156542	0.0518453
wt_h3k27ac.q.05_peak_37399	wt_h3k27ac.q.05_peak_37399	-0.952736	3.43173	9.99978	0.00156559	0.0518453
wt_h3k27ac.q.05_peak_56996	wt_h3k27ac.q.05_peak_56996	-0.6188	3.95343	9.99974	0.00156563	0.0518453
wt_h3k27ac.q.05_peak_51960	wt_h3k27ac.q.05_peak_51960	-0.978508	2.7973	9.99919	0.00156609	0.0518453
wt_h3k27ac.q.05_peak_51354	wt_h3k27ac.q.05_peak_51354	-0.93203	3.25295	9.9982	0.00156693	0.0518453
wt_h3k27ac.q.05_peak_31614	wt_h3k27ac.q.05_peak_31614	-0.929549	3.19156	9.99719	0.00156779	0.0518453
wt_h3k27ac.q.05_peak_25900	wt_h3k27ac.q.05_peak_25900	-1.41869	1.91599	9.99676	0.00156815	0.0518453
wt_h3k27ac.q.05_peak_54786	wt_h3k27ac.q.05_peak_54786	-0.668786	4.15988	9.99567	0.00156909	0.051849
wt_h3k27ac.q.05_peak_36415	wt_h3k27ac.q.05_peak_36415	-2.04626	2.21236	9.99185	0.00157235	0.0519294
wt_h3k27ac.q.05_peak_27299	wt_h3k27ac.q.05_peak_27299	0.304723	5.93502	9.9901	0.00157384	0.0519514
wt_h3k27ac.q.05_peak_1550	wt_h3k27ac.q.05_peak_1550	0.231915	8.06644	9.98515	0.00157808	0.05204
wt_h3k27ac.q.05_peak_53992	wt_h3k27ac.q.05_peak_53992	0.301237	5.96745	9.98504	0.00157817	0.05204
wt_h3k27ac.q.05_peak_18328	wt_h3k27ac.q.05_peak_18328	0.617424	3.95355	9.98137	0.00158132	0.0521166
wt_h3k27ac.q.05_peak_47280	wt_h3k27ac.q.05_peak_47280	-0.868535	3.06037	9.97604	0.0015859	0.0521971
wt_h3k27ac.q.05_peak_7418	wt_h3k27ac.q.05_peak_7418	-1.09498	2.49247	9.97565	0.00158624	0.0521971
wt_h3k27ac.q.05_peak_14628	wt_h3k27ac.q.05_peak_14628	-1.09498	2.49248	9.97564	0.00158625	0.0521971
wt_h3k27ac.q.05_peak_22873	wt_h3k27ac.q.05_peak_22873	0.288201	6.09306	9.97143	0.00158988	0.0522229
wt_h3k27ac.q.05_peak_80289	wt_h3k27ac.q.05_peak_80289	-0.530726	4.36847	9.97132	0.00158998	0.0522229
wt_h3k27ac.q.05_peak_13506	wt_h3k27ac.q.05_peak_13506	-0.570359	4.17053	9.96835	0.00159254	0.0522229
wt_h3k27ac.q.05_peak_31816	wt_h3k27ac.q.05_peak_31816	-1.18282	2.31192	9.9665	0.00159415	0.0522229
wt_h3k27ac.q.05_peak_66056	wt_h3k27ac.q.05_peak_66056	-1.18282	2.31192	9.96649	0.00159415	0.0522229
wt_h3k27ac.q.05_peak_5201	wt_h3k27ac.q.05_peak_5201	-1.18282	2.31191	9.96648	0.00159416	0.0522229
wt_h3k27ac.q.05_peak_32825	wt_h3k27ac.q.05_peak_32825	-1.18282	2.3119	9.96647	0.00159417	0.0522229
wt_h3k27ac.q.05_peak_60502	wt_h3k27ac.q.05_peak_60502	-1.18281	2.31189	9.96646	0.00159418	0.0522229
wt_h3k27ac.q.05_peak_18655	wt_h3k27ac.q.05_peak_18655	0.358784	5.54879	9.96611	0.00159448	0.0522229
wt_h3k27ac.q.05_peak_46620	wt_h3k27ac.q.05_peak_46620	-1.13545	2.405	9.95665	0.0016027	0.0524648
wt_h3k27ac.q.05_peak_31942	wt_h3k27ac.q.05_peak_31942	0.616725	4.84145	9.94915	0.00160923	0.0526515
wt_h3k27ac.q.05_peak_78426	wt_h3k27ac.q.05_peak_78426	0.790743	3.29265	9.94712	0.00161101	0.0526692
wt_h3k27ac.q.05_peak_46170	wt_h3k27ac.q.05_peak_46170	0.668277	4.11662	9.94663	0.00161144	0.0526692
wt_h3k27ac.q.05_peak_36613	wt_h3k27ac.q.05_peak_36613	-1.67837	2.25303	9.94347	0.00161421	0.0527322
wt_h3k27ac.q.05_peak_7923	wt_h3k27ac.q.05_peak_7923	0.222274	6.84563	9.94107	0.00161631	0.0527736
wt_h3k27ac.q.05_peak_8873	wt_h3k27ac.q.05_peak_8873	-0.655435	3.79041	9.94002	0.00161724	0.0527765
wt_h3k27ac.q.05_peak_42936	wt_h3k27ac.q.05_peak_42936	0.670211	3.98406	9.93833	0.00161872	0.0527976
wt_h3k27ac.q.05_peak_63808	wt_h3k27ac.q.05_peak_63808	-0.774205	3.34986	9.93403	0.00162251	0.0528509
wt_h3k27ac.q.05_peak_45550	wt_h3k27ac.q.05_peak_45550	-0.502606	4.51348	9.93377	0.00162274	0.0528509
wt_h3k27ac.q.05_peak_57688	wt_h3k27ac.q.05_peak_57688	0.920719	2.90335	9.93362	0.00162287	0.0528509
wt_h3k27ac.q.05_peak_50997	wt_h3k27ac.q.05_peak_50997	0.541979	4.30234	9.93266	0.00162372	0.0528513
wt_h3k27ac.q.05_peak_22853	wt_h3k27ac.q.05_peak_22853	0.642742	3.83808	9.9304	0.00162571	0.0528888
wt_h3k27ac.q.05_peak_51716	wt_h3k27ac.q.05_peak_51716	0.398699	5.6739	9.92743	0.00162834	0.0529471
wt_h3k27ac.q.05_peak_33745	wt_h3k27ac.q.05_peak_33745	-0.398373	5.16254	9.92346	0.00163185	0.052978
wt_h3k27ac.q.05_peak_3742	wt_h3k27ac.q.05_peak_3742	-0.816026	3.21235	9.9228	0.00163244	0.052978
wt_h3k27ac.q.05_peak_77896	wt_h3k27ac.q.05_peak_77896	-1.72906	2.3685	9.92264	0.00163258	0.052978
wt_h3k27ac.q.05_peak_26824	wt_h3k27ac.q.05_peak_26824	-0.853476	3.26295	9.92166	0.00163345	0.052978
wt_h3k27ac.q.05_peak_59861	wt_h3k27ac.q.05_peak_59861	-0.793994	3.28272	9.92162	0.00163349	0.052978
wt_h3k27ac.q.05_peak_25080	wt_h3k27ac.q.05_peak_25080	-0.640025	3.85123	9.9183	0.00163643	0.0530461
wt_h3k27ac.q.05_peak_77114	wt_h3k27ac.q.05_peak_77114	-0.978273	2.75551	9.91297	0.00164118	0.053146
wt_h3k27ac.q.05_peak_33031	wt_h3k27ac.q.05_peak_33031	-0.978272	2.7555	9.91295	0.0016412	0.053146
wt_h3k27ac.q.05_peak_23243	wt_h3k27ac.q.05_peak_23243	-0.515307	4.7197	9.91027	0.00164359	0.0531727
wt_h3k27ac.q.05_peak_11608	wt_h3k27ac.q.05_peak_11608	-0.916672	2.91595	9.91014	0.00164371	0.0531727
wt_h3k27ac.q.05_peak_76504	wt_h3k27ac.q.05_peak_76504	-0.64309	3.9032	9.90711	0.00164642	0.0532085
wt_h3k27ac.q.05_peak_3133	wt_h3k27ac.q.05_peak_3133	-0.625934	3.90959	9.90701	0.0016465	0.0532085
wt_h3k27ac.q.05_peak_4884	wt_h3k27ac.q.05_peak_4884	-0.682973	3.67551	9.90357	0.00164959	0.0532809
wt_h3k27ac.q.05_peak_13324	wt_h3k27ac.q.05_peak_13324	0.31953	5.78544	9.89963	0.00165312	0.0533678
wt_h3k27ac.q.05_peak_59288	wt_h3k27ac.q.05_peak_59288	0.219511	6.87605	9.89799	0.0016546	0.053388
wt_h3k27ac.q.05_peak_69710	wt_h3k27ac.q.05_peak_69710	0.887712	2.99008	9.89677	0.00165569	0.0533959
wt_h3k27ac.q.05_peak_34387	wt_h3k27ac.q.05_peak_34387	-0.483954	4.61051	9.87826	0.00167243	0.053903
wt_h3k27ac.q.05_peak_9740	wt_h3k27ac.q.05_peak_9740	0.572614	4.14389	9.8775	0.00167312	0.053903
wt_h3k27ac.q.05_peak_44685	wt_h3k27ac.q.05_peak_44685	-1.02218	2.90327	9.87402	0.00167629	0.0539387
wt_h3k27ac.q.05_peak_79137	wt_h3k27ac.q.05_peak_79137	0.979767	2.74137	9.87155	0.00167854	0.0539387
wt_h3k27ac.q.05_peak_55176	wt_h3k27ac.q.05_peak_55176	0.979765	2.74138	9.87152	0.00167857	0.0539387
wt_h3k27ac.q.05_peak_5486	wt_h3k27ac.q.05_peak_5486	0.979765	2.74139	9.87151	0.00167858	0.0539387
wt_h3k27ac.q.05_peak_75778	wt_h3k27ac.q.05_peak_75778	0.979764	2.74138	9.8715	0.00167858	0.0539387
wt_h3k27ac.q.05_peak_74066	wt_h3k27ac.q.05_peak_74066	-0.499475	4.52187	9.87065	0.00167936	0.0539387
wt_h3k27ac.q.05_peak_63501	wt_h3k27ac.q.05_peak_63501	-1.03965	2.98996	9.8673	0.00168242	0.0540095
wt_h3k27ac.q.05_peak_56362	wt_h3k27ac.q.05_peak_56362	0.44654	5.57908	9.86143	0.00168779	0.054151
wt_h3k27ac.q.05_peak_56529	wt_h3k27ac.q.05_peak_56529	0.191251	7.27805	9.85984	0.00168926	0.054151
wt_h3k27ac.q.05_peak_56227	wt_h3k27ac.q.05_peak_56227	-0.575051	4.13291	9.85968	0.0016894	0.054151
wt_h3k27ac.q.05_peak_63502	wt_h3k27ac.q.05_peak_63502	-0.94483	3.13832	9.85254	0.00169598	0.0543342
wt_h3k27ac.q.05_peak_33339	wt_h3k27ac.q.05_peak_33339	-0.616738	4.01375	9.85063	0.00169773	0.0543628
wt_h3k27ac.q.05_peak_61253	wt_h3k27ac.q.05_peak_61253	0.403754	5.17602	9.84765	0.00170049	0.0544235
wt_h3k27ac.q.05_peak_69445	wt_h3k27ac.q.05_peak_69445	-0.882433	3.00192	9.8389	0.00170859	0.0546371
wt_h3k27ac.q.05_peak_42891	wt_h3k27ac.q.05_peak_42891	-1.40426	2.50937	9.83858	0.0017089	0.0546371
wt_h3k27ac.q.05_peak_57551	wt_h3k27ac.q.05_peak_57551	-0.584999	4.08309	9.83751	0.00170989	0.054641
wt_h3k27ac.q.05_peak_66787	wt_h3k27ac.q.05_peak_66787	0.330424	5.9628	9.82759	0.00171914	0.0548702
wt_h3k27ac.q.05_peak_33292	wt_h3k27ac.q.05_peak_33292	1.09158	2.47548	9.82731	0.0017194	0.0548702
wt_h3k27ac.q.05_peak_16461	wt_h3k27ac.q.05_peak_16461	-1.64093	2.78349	9.82702	0.00171967	0.0548702
wt_h3k27ac.q.05_peak_38680	wt_h3k27ac.q.05_peak_38680	-1.00301	2.68299	9.82439	0.00172213	0.0548748
wt_h3k27ac.q.05_peak_16228	wt_h3k27ac.q.05_peak_16228	0.274067	6.74246	9.82249	0.00172391	0.0548748
wt_h3k27ac.q.05_peak_52667	wt_h3k27ac.q.05_peak_52667	0.373773	5.32641	9.8224	0.00172399	0.0548748
wt_h3k27ac.q.05_peak_52085	wt_h3k27ac.q.05_peak_52085	-1.58339	1.916	9.82033	0.00172593	0.0548748
wt_h3k27ac.q.05_peak_11139	wt_h3k27ac.q.05_peak_11139	-0.979487	2.91599	9.81774	0.00172837	0.0548748
wt_h3k27ac.q.05_peak_70274	wt_h3k27ac.q.05_peak_70274	-1.32871	3.28264	9.81728	0.0017288	0.0548748
wt_h3k27ac.q.05_peak_52379	wt_h3k27ac.q.05_peak_52379	-0.633557	3.86441	9.81706	0.00172901	0.0548748
wt_h3k27ac.q.05_peak_31746	wt_h3k27ac.q.05_peak_31746	-0.633557	3.86439	9.81704	0.00172902	0.0548748
wt_h3k27ac.q.05_peak_42527	wt_h3k27ac.q.05_peak_42527	-1.32671	2.0373	9.81575	0.00173023	0.0548748
wt_h3k27ac.q.05_peak_62348	wt_h3k27ac.q.05_peak_62348	-1.32671	2.03729	9.81575	0.00173024	0.0548748
wt_h3k27ac.q.05_peak_71994	wt_h3k27ac.q.05_peak_71994	-1.32671	2.03729	9.81574	0.00173025	0.0548748
wt_h3k27ac.q.05_peak_6104	wt_h3k27ac.q.05_peak_6104	-1.32671	2.03728	9.81574	0.00173025	0.0548748
wt_h3k27ac.q.05_peak_73101	wt_h3k27ac.q.05_peak_73101	-1.15403	3.55876	9.81372	0.00173214	0.0548858
wt_h3k27ac.q.05_peak_31747	wt_h3k27ac.q.05_peak_31747	0.665831	3.72704	9.8126	0.0017332	0.0548858
wt_h3k27ac.q.05_peak_59658	wt_h3k27ac.q.05_peak_59658	0.665831	3.72705	9.81259	0.00173321	0.0548858
wt_h3k27ac.q.05_peak_63247	wt_h3k27ac.q.05_peak_63247	-1.02798	2.6978	9.81091	0.0017348	0.0549085
wt_h3k27ac.q.05_peak_38108	wt_h3k27ac.q.05_peak_38108	0.636521	4.73077	9.80989	0.00173576	0.0549103
wt_h3k27ac.q.05_peak_77294	wt_h3k27ac.q.05_peak_77294	0.606452	3.97803	9.80901	0.00173659	0.0549103
wt_h3k27ac.q.05_peak_58344	wt_h3k27ac.q.05_peak_58344	-1.17358	2.91598	9.80322	0.00174207	0.055013
wt_h3k27ac.q.05_peak_53072	wt_h3k27ac.q.05_peak_53072	-0.979231	2.87752	9.8028	0.00174247	0.055013
wt_h3k27ac.q.05_peak_70175	wt_h3k27ac.q.05_peak_70175	0.367456	5.40745	9.80254	0.00174271	0.055013
[truncated: 61,083 more rows]

## Sheet: de_h3k4me3_after_RUVr
	genes	logFC	logCPM	LR	PValue	FDR
wt_h3k4me3.q.05_peak_8477	wt_h3k4me3.q.05_peak_8477	0.317348	7.02352	47.8384	4.62832e-12	9.21776e-08
wt_h3k4me3.q.05_peak_11474	wt_h3k4me3.q.05_peak_11474	-0.442891	5.8907	43.6681	3.89062e-11	3.87428e-07
wt_h3k4me3.q.05_peak_18520	wt_h3k4me3.q.05_peak_18520	-0.336193	6.34798	34.3741	4.54725e-09	2.54891e-05
wt_h3k4me3.q.05_peak_17474	wt_h3k4me3.q.05_peak_17474	0.303833	6.63298	33.9545	5.64157e-09	2.54891e-05
wt_h3k4me3.q.05_peak_4656	wt_h3k4me3.q.05_peak_4656	-0.808271	3.81138	33.7094	6.39916e-09	2.54891e-05
wt_h3k4me3.q.05_peak_561	wt_h3k4me3.q.05_peak_561	-2.80273	0.920081	32.6937	1.07886e-08	3.48521e-05
wt_h3k4me3.q.05_peak_5161	wt_h3k4me3.q.05_peak_5161	1.27373	2.56579	32.4469	1.22497e-08	3.48521e-05
wt_h3k4me3.q.05_peak_6870	wt_h3k4me3.q.05_peak_6870	-1.00857	3.11054	31.2517	2.26649e-08	5.64242e-05
wt_h3k4me3.q.05_peak_10793	wt_h3k4me3.q.05_peak_10793	-0.324934	6.30963	29.8282	4.72085e-08	0.000104467
wt_h3k4me3.q.05_peak_10720	wt_h3k4me3.q.05_peak_10720	-0.458027	6.25822	27.9589	1.2392e-07	0.0002468
wt_h3k4me3.q.05_peak_7407	wt_h3k4me3.q.05_peak_7407	-0.239363	7.01676	27.1715	1.8618e-07	0.000337088
wt_h3k4me3.q.05_peak_5518	wt_h3k4me3.q.05_peak_5518	-0.328785	6.02388	26.4632	2.68609e-07	0.000445801
wt_h3k4me3.q.05_peak_15415	wt_h3k4me3.q.05_peak_15415	-0.24079	6.92662	25.9251	3.54928e-07	0.000511108
wt_h3k4me3.q.05_peak_11046	wt_h3k4me3.q.05_peak_11046	1.73073	3.64887	25.9015	3.59285e-07	0.000511108
wt_h3k4me3.q.05_peak_14517	wt_h3k4me3.q.05_peak_14517	0.418574	5.26966	25.579	4.24645e-07	0.000563816
wt_h3k4me3.q.05_peak_5617	wt_h3k4me3.q.05_peak_5617	-0.473731	4.8424	24.3625	7.98078e-07	0.000993408
wt_h3k4me3.q.05_peak_1118	wt_h3k4me3.q.05_peak_1118	-2.13231	1.03197	24.1584	8.87273e-07	0.0010379
wt_h3k4me3.q.05_peak_5871	wt_h3k4me3.q.05_peak_5871	0.285252	6.30294	24.0513	9.38049e-07	0.0010379
wt_h3k4me3.q.05_peak_5602	wt_h3k4me3.q.05_peak_5602	-0.480238	4.77485	23.8858	1.02222e-06	0.0010715
wt_h3k4me3.q.05_peak_17308	wt_h3k4me3.q.05_peak_17308	-0.339341	5.76436	23.6464	1.15764e-06	0.00115278
wt_h3k4me3.q.05_peak_16608	wt_h3k4me3.q.05_peak_16608	-1.99988	1.15571	23.3845	1.32645e-06	0.00123934
wt_h3k4me3.q.05_peak_4462	wt_h3k4me3.q.05_peak_4462	-0.283642	6.55507	23.1649	1.48683e-06	0.00123934
wt_h3k4me3.q.05_peak_5691	wt_h3k4me3.q.05_peak_5691	-1.57232	1.60974	23.1014	1.53678e-06	0.00123934
wt_h3k4me3.q.05_peak_13577	wt_h3k4me3.q.05_peak_13577	1.36298	2.14579	23.0185	1.60448e-06	0.00123934
wt_h3k4me3.q.05_peak_18928	wt_h3k4me3.q.05_peak_18928	0.170758	7.8096	22.963	1.65146e-06	0.00123934
wt_h3k4me3.q.05_peak_953	wt_h3k4me3.q.05_peak_953	-0.256695	6.54662	22.9344	1.67626e-06	0.00123934
wt_h3k4me3.q.05_peak_17035	wt_h3k4me3.q.05_peak_17035	0.33155	5.78765	22.9299	1.68017e-06	0.00123934
wt_h3k4me3.q.05_peak_14231	wt_h3k4me3.q.05_peak_14231	-0.328839	5.85767	22.7206	1.87352e-06	0.0013326
wt_h3k4me3.q.05_peak_9694	wt_h3k4me3.q.05_peak_9694	-2.14539	0.92008	22.2387	2.40771e-06	0.00163615
wt_h3k4me3.q.05_peak_5068	wt_h3k4me3.q.05_peak_5068	-0.759729	3.38795	22.1691	2.49659e-06	0.00163615
wt_h3k4me3.q.05_peak_12686	wt_h3k4me3.q.05_peak_12686	-1.20843	2.17534	22.1309	2.54673e-06	0.00163615
wt_h3k4me3.q.05_peak_11866	wt_h3k4me3.q.05_peak_11866	-0.251962	6.54096	22.0159	2.70404e-06	0.00168292
wt_h3k4me3.q.05_peak_4949	wt_h3k4me3.q.05_peak_4949	-0.400998	5.16188	21.8319	2.97617e-06	0.00179616
wt_h3k4me3.q.05_peak_20139	wt_h3k4me3.q.05_peak_20139	0.971133	2.70735	21.7307	3.13733e-06	0.00183774
wt_h3k4me3.q.05_peak_17180	wt_h3k4me3.q.05_peak_17180	-0.398	5.15448	21.4007	3.72629e-06	0.00206741
wt_h3k4me3.q.05_peak_13963	wt_h3k4me3.q.05_peak_13963	-1.426	1.77324	21.3952	3.73703e-06	0.00206741
wt_h3k4me3.q.05_peak_6244	wt_h3k4me3.q.05_peak_6244	-1.90946	1.09517	21.3326	3.86102e-06	0.00207827
wt_h3k4me3.q.05_peak_10212	wt_h3k4me3.q.05_peak_10212	0.686426	3.60613	21.2403	4.05156e-06	0.00209925
wt_h3k4me3.q.05_peak_13105	wt_h3k4me3.q.05_peak_13105	-0.245653	6.56115	21.2125	4.11081e-06	0.00209925
wt_h3k4me3.q.05_peak_12814	wt_h3k4me3.q.05_peak_12814	-0.480895	4.69211	21.1231	4.30696e-06	0.00214444
wt_h3k4me3.q.05_peak_15416	wt_h3k4me3.q.05_peak_15416	-1.85826	1.15571	20.997	4.59996e-06	0.00223446
wt_h3k4me3.q.05_peak_1068	wt_h3k4me3.q.05_peak_1068	-2.39175	0.638309	20.6339	5.56022e-06	0.0026366
wt_h3k4me3.q.05_peak_4361	wt_h3k4me3.q.05_peak_4361	0.791496	3.16555	20.4555	6.1034e-06	0.00282687
wt_h3k4me3.q.05_peak_10540	wt_h3k4me3.q.05_peak_10540	0.446856	4.75215	20.3851	6.33204e-06	0.00286611
wt_h3k4me3.q.05_peak_3820	wt_h3k4me3.q.05_peak_3820	0.324035	5.67496	20.2968	6.63108e-06	0.00291866
wt_h3k4me3.q.05_peak_19799	wt_h3k4me3.q.05_peak_19799	-0.363454	5.33766	20.2653	6.74124e-06	0.00291866
wt_h3k4me3.q.05_peak_8623	wt_h3k4me3.q.05_peak_8623	0.337377	5.54802	20.1718	7.07875e-06	0.00299958
wt_h3k4me3.q.05_peak_3637	wt_h3k4me3.q.05_peak_3637	-0.437034	4.79561	20.114	7.29599e-06	0.00302723
wt_h3k4me3.q.05_peak_5963	wt_h3k4me3.q.05_peak_5963	-0.54772	4.1458	19.9804	7.82417e-06	0.00313527
wt_h3k4me3.q.05_peak_6410	wt_h3k4me3.q.05_peak_6410	0.329725	5.59614	19.915	8.09611e-06	0.00313527
wt_h3k4me3.q.05_peak_1973	wt_h3k4me3.q.05_peak_1973	1.20496	2.0427	19.9115	8.11114e-06	0.00313527
wt_h3k4me3.q.05_peak_6976	wt_h3k4me3.q.05_peak_6976	0.224791	6.73075	19.8749	8.26806e-06	0.00313527
wt_h3k4me3.q.05_peak_11178	wt_h3k4me3.q.05_peak_11178	0.189554	7.25157	19.8575	8.34352e-06	0.00313527
wt_h3k4me3.q.05_peak_355	wt_h3k4me3.q.05_peak_355	-0.179312	7.41323	19.7168	8.98065e-06	0.0033122
wt_h3k4me3.q.05_peak_13222	wt_h3k4me3.q.05_peak_13222	0.504534	4.35605	19.4648	1.0247e-05	0.00371055
wt_h3k4me3.q.05_peak_7114	wt_h3k4me3.q.05_peak_7114	-0.250109	6.36997	19.3631	1.08077e-05	0.00381545
wt_h3k4me3.q.05_peak_7853	wt_h3k4me3.q.05_peak_7853	0.937684	2.66632	19.3433	1.09199e-05	0.00381545
wt_h3k4me3.q.05_peak_2071	wt_h3k4me3.q.05_peak_2071	-0.186323	7.25591	19.2453	1.14955e-05	0.00394733
wt_h3k4me3.q.05_peak_14794	wt_h3k4me3.q.05_peak_14794	0.193043	7.99998	19.1269	1.22311e-05	0.00412872
wt_h3k4me3.q.05_peak_4038	wt_h3k4me3.q.05_peak_4038	-0.942067	2.60251	19.0276	1.2884e-05	0.00427663
wt_h3k4me3.q.05_peak_5708	wt_h3k4me3.q.05_peak_5708	-0.41126	4.88177	18.9277	1.35768e-05	0.0044327
wt_h3k4me3.q.05_peak_3258	wt_h3k4me3.q.05_peak_3258	-0.139631	8.13707	18.81	1.44407e-05	0.00463871
wt_h3k4me3.q.05_peak_5561	wt_h3k4me3.q.05_peak_5561	0.786065	3.48552	18.7487	1.49126e-05	0.00467114
wt_h3k4me3.q.05_peak_7055	wt_h3k4me3.q.05_peak_7055	0.88911	2.73407	18.7362	1.50107e-05	0.00467114
wt_h3k4me3.q.05_peak_9733	wt_h3k4me3.q.05_peak_9733	0.97902	2.47368	18.6059	1.60725e-05	0.00482875
wt_h3k4me3.q.05_peak_17414	wt_h3k4me3.q.05_peak_17414	-1.65994	1.60974	18.5893	1.62129e-05	0.00482875
wt_h3k4me3.q.05_peak_16291	wt_h3k4me3.q.05_peak_16291	0.787208	3.81137	18.5856	1.62445e-05	0.00482875
wt_h3k4me3.q.05_peak_6595	wt_h3k4me3.q.05_peak_6595	-2.18155	0.666324	18.4077	1.78339e-05	0.00508078
wt_h3k4me3.q.05_peak_4531	wt_h3k4me3.q.05_peak_4531	-2.18155	0.666324	18.4077	1.78339e-05	0.00508078
wt_h3k4me3.q.05_peak_7540	wt_h3k4me3.q.05_peak_7540	-1.92769	0.896621	18.3984	1.79212e-05	0.00508078
wt_h3k4me3.q.05_peak_19966	wt_h3k4me3.q.05_peak_19966	0.546287	4.03466	18.3781	1.81128e-05	0.00508078
wt_h3k4me3.q.05_peak_14404	wt_h3k4me3.q.05_peak_14404	0.944053	2.54331	18.2763	1.91073e-05	0.00528529
wt_h3k4me3.q.05_peak_19714	wt_h3k4me3.q.05_peak_19714	-1.62084	1.39215	18.1869	2.00251e-05	0.00540692
wt_h3k4me3.q.05_peak_17499	wt_h3k4me3.q.05_peak_17499	0.99143	2.40883	18.1674	2.02312e-05	0.00540692
wt_h3k4me3.q.05_peak_7678	wt_h3k4me3.q.05_peak_7678	0.293354	6.49531	18.1552	2.03615e-05	0.00540692
wt_h3k4me3.q.05_peak_10504	wt_h3k4me3.q.05_peak_10504	0.721542	3.28781	18.0339	2.17001e-05	0.00568658
wt_h3k4me3.q.05_peak_16895	wt_h3k4me3.q.05_peak_16895	0.494681	4.28103	17.9607	2.25514e-05	0.00583289
wt_h3k4me3.q.05_peak_8673	wt_h3k4me3.q.05_peak_8673	0.974623	2.91425	17.9333	2.28782e-05	0.00584156
wt_h3k4me3.q.05_peak_2462	wt_h3k4me3.q.05_peak_2462	-0.798947	2.94888	17.8438	2.398e-05	0.00604538
wt_h3k4me3.q.05_peak_3337	wt_h3k4me3.q.05_peak_3337	0.213306	6.72368	17.8178	2.43095e-05	0.00605185
wt_h3k4me3.q.05_peak_20152	wt_h3k4me3.q.05_peak_20152	0.365855	5.12323	17.7175	2.56253e-05	0.00630067
wt_h3k4me3.q.05_peak_986	wt_h3k4me3.q.05_peak_986	0.268331	6.02184	17.6338	2.67787e-05	0.00650395
wt_h3k4me3.q.05_peak_3663	wt_h3k4me3.q.05_peak_3663	0.244836	6.28837	17.5685	2.77143e-05	0.00657864
wt_h3k4me3.q.05_peak_17755	wt_h3k4me3.q.05_peak_17755	-0.355449	5.1923	17.5511	2.79694e-05	0.00657864
wt_h3k4me3.q.05_peak_12147	wt_h3k4me3.q.05_peak_12147	0.399426	4.85462	17.5245	2.83624e-05	0.00657864
wt_h3k4me3.q.05_peak_17117	wt_h3k4me3.q.05_peak_17117	0.274341	5.94673	17.5192	2.84421e-05	0.00657864
wt_h3k4me3.q.05_peak_9211	wt_h3k4me3.q.05_peak_9211	-1.89058	0.872775	17.4723	2.9152e-05	0.00657864
wt_h3k4me3.q.05_peak_16854	wt_h3k4me3.q.05_peak_16854	-1.94917	1.30573	17.4595	2.93494e-05	0.00657864
wt_h3k4me3.q.05_peak_1252	wt_h3k4me3.q.05_peak_1252	-1.35913	1.58059	17.4563	2.93984e-05	0.00657864
wt_h3k4me3.q.05_peak_5747	wt_h3k4me3.q.05_peak_5747	0.19644	6.93634	17.3811	3.05854e-05	0.0067682
wt_h3k4me3.q.05_peak_1907	wt_h3k4me3.q.05_peak_1907	-0.229996	6.45373	17.323	3.15343e-05	0.00690151
wt_h3k4me3.q.05_peak_11767	wt_h3k4me3.q.05_peak_11767	0.577631	3.79243	17.2952	3.20002e-05	0.00692734
wt_h3k4me3.q.05_peak_6086	wt_h3k4me3.q.05_peak_6086	1.03668	2.22327	17.2279	3.31534e-05	0.00709983
wt_h3k4me3.q.05_peak_17869	wt_h3k4me3.q.05_peak_17869	-2.30567	0.747244	17.1656	3.4259e-05	0.00725853
wt_h3k4me3.q.05_peak_20443	wt_h3k4me3.q.05_peak_20443	-0.254257	6.25591	17.1297	3.49125e-05	0.00730824
wt_h3k4me3.q.05_peak_9084	wt_h3k4me3.q.05_peak_9084	0.814825	2.99379	17.1126	3.52275e-05	0.00730824
wt_h3k4me3.q.05_peak_5093	wt_h3k4me3.q.05_peak_5093	-0.4067	4.75216	16.9284	3.88159e-05	0.00788362
wt_h3k4me3.q.05_peak_7295	wt_h3k4me3.q.05_peak_7295	-0.290117	5.72993	16.9155	3.90814e-05	0.00788362
wt_h3k4me3.q.05_peak_16379	wt_h3k4me3.q.05_peak_16379	0.126037	8.29945	16.9103	3.91885e-05	0.00788362
wt_h3k4me3.q.05_peak_8137	wt_h3k4me3.q.05_peak_8137	-0.246958	6.2019	16.8726	3.99738e-05	0.00791661
wt_h3k4me3.q.05_peak_7446	wt_h3k4me3.q.05_peak_7446	0.18919	7.0048	16.8615	4.0208e-05	0.00791661
wt_h3k4me3.q.05_peak_6009	wt_h3k4me3.q.05_peak_6009	0.236228	6.3322	16.8457	4.0545e-05	0.00791661
wt_h3k4me3.q.05_peak_6611	wt_h3k4me3.q.05_peak_6611	-0.843921	2.72077	16.8101	4.13133e-05	0.00792331
wt_h3k4me3.q.05_peak_12869	wt_h3k4me3.q.05_peak_12869	0.281321	5.81137	16.8072	4.1375e-05	0.00792331
wt_h3k4me3.q.05_peak_11654	wt_h3k4me3.q.05_peak_11654	0.530923	3.98547	16.7868	4.18234e-05	0.00793291
wt_h3k4me3.q.05_peak_18113	wt_h3k4me3.q.05_peak_18113	0.225384	6.59523	16.6855	4.41163e-05	0.00828886
wt_h3k4me3.q.05_peak_14452	wt_h3k4me3.q.05_peak_14452	1.2023	1.81137	16.6518	4.49071e-05	0.0083586
wt_h3k4me3.q.05_peak_169	wt_h3k4me3.q.05_peak_169	-0.209019	6.68014	16.6301	4.54252e-05	0.00837674
wt_h3k4me3.q.05_peak_12631	wt_h3k4me3.q.05_peak_12631	0.221136	6.50842	16.6062	4.59998e-05	0.00840488
wt_h3k4me3.q.05_peak_9667	wt_h3k4me3.q.05_peak_9667	-0.668404	3.49336	16.5405	4.76225e-05	0.00862227
wt_h3k4me3.q.05_peak_4885	wt_h3k4me3.q.05_peak_4885	0.15591	7.5732	16.5077	4.84517e-05	0.00869337
wt_h3k4me3.q.05_peak_1698	wt_h3k4me3.q.05_peak_1698	-1.91935	0.773239	16.4667	4.95128e-05	0.00880443
wt_h3k4me3.q.05_peak_12958	wt_h3k4me3.q.05_peak_12958	-0.293332	5.65414	16.4233	5.06599e-05	0.00887467
wt_h3k4me3.q.05_peak_15250	wt_h3k4me3.q.05_peak_15250	-1.99811	0.693804	16.4181	5.0799e-05	0.00887467
wt_h3k4me3.q.05_peak_20323	wt_h3k4me3.q.05_peak_20323	-0.407274	4.70229	16.3998	5.12897e-05	0.00888248
wt_h3k4me3.q.05_peak_2092	wt_h3k4me3.q.05_peak_2092	-0.348451	5.14952	16.3831	5.17437e-05	0.00888386
wt_h3k4me3.q.05_peak_5467	wt_h3k4me3.q.05_peak_5467	-1.18938	1.79877	16.1893	5.73176e-05	0.0097548
wt_h3k4me3.q.05_peak_7925	wt_h3k4me3.q.05_peak_7925	-0.624762	3.47764	16.1528	5.84309e-05	0.0097548
wt_h3k4me3.q.05_peak_20219	wt_h3k4me3.q.05_peak_20219	-0.454999	4.36463	16.1514	5.84766e-05	0.0097548
wt_h3k4me3.q.05_peak_3152	wt_h3k4me3.q.05_peak_3152	0.206534	6.67151	16.1417	5.87757e-05	0.0097548
wt_h3k4me3.q.05_peak_12485	wt_h3k4me3.q.05_peak_12485	0.182624	7.03901	16.0673	6.11293e-05	0.0100484
wt_h3k4me3.q.05_peak_9397	wt_h3k4me3.q.05_peak_9397	-0.452252	4.37315	16.0542	6.15538e-05	0.0100484
wt_h3k4me3.q.05_peak_20360	wt_h3k4me3.q.05_peak_20360	-0.379791	5.09775	16.027	6.24455e-05	0.0101111
wt_h3k4me3.q.05_peak_12315	wt_h3k4me3.q.05_peak_12315	-0.361668	4.99931	15.9091	6.64592e-05	0.0106742
wt_h3k4me3.q.05_peak_14424	wt_h3k4me3.q.05_peak_14424	1.04043	2.10543	15.8877	6.72135e-05	0.010709
wt_h3k4me3.q.05_peak_19070	wt_h3k4me3.q.05_peak_19070	0.81721	2.72743	15.8652	6.80173e-05	0.0107511
wt_h3k4me3.q.05_peak_12423	wt_h3k4me3.q.05_peak_12423	-0.219548	6.45574	15.8097	7.00432e-05	0.0109841
wt_h3k4me3.q.05_peak_17903	wt_h3k4me3.q.05_peak_17903	-0.300055	5.69806	15.7817	7.10875e-05	0.0110456
wt_h3k4me3.q.05_peak_20365	wt_h3k4me3.q.05_peak_20365	-1.56486	1.13581	15.7578	7.19904e-05	0.0110456
wt_h3k4me3.q.05_peak_12805	wt_h3k4me3.q.05_peak_12805	-0.145319	7.72224	15.7549	7.20992e-05	0.0110456
wt_h3k4me3.q.05_peak_4384	wt_h3k4me3.q.05_peak_4384	-1.56631	1.21381	15.7149	7.36412e-05	0.011121
wt_h3k4me3.q.05_peak_8872	wt_h3k4me3.q.05_peak_8872	0.18716	6.92986	15.7132	7.37084e-05	0.011121
wt_h3k4me3.q.05_peak_8829	wt_h3k4me3.q.05_peak_8829	0.153417	7.54472	15.6975	7.43207e-05	0.0111291
wt_h3k4me3.q.05_peak_9267	wt_h3k4me3.q.05_peak_9267	-1.81336	0.823865	15.6536	7.60675e-05	0.0113057
wt_h3k4me3.q.05_peak_7512	wt_h3k4me3.q.05_peak_7512	-0.229931	6.29849	15.6106	7.78183e-05	0.0114802
wt_h3k4me3.q.05_peak_8196	wt_h3k4me3.q.05_peak_8196	-0.25767	5.95883	15.5933	7.85337e-05	0.0115006
wt_h3k4me3.q.05_peak_12528	wt_h3k4me3.q.05_peak_12528	-0.226102	6.34418	15.5647	7.97296e-05	0.0115905
wt_h3k4me3.q.05_peak_6197	wt_h3k4me3.q.05_peak_6197	0.452867	4.32123	15.5176	8.17417e-05	0.011658
wt_h3k4me3.q.05_peak_10195	wt_h3k4me3.q.05_peak_10195	-0.226442	6.33494	15.5144	8.18811e-05	0.011658
wt_h3k4me3.q.05_peak_2482	wt_h3k4me3.q.05_peak_2482	-0.309519	5.78766	15.5128	8.195e-05	0.011658
wt_h3k4me3.q.05_peak_8825	wt_h3k4me3.q.05_peak_8825	-0.200075	6.70102	15.4531	8.45799e-05	0.011908
wt_h3k4me3.q.05_peak_11343	wt_h3k4me3.q.05_peak_11343	-0.219399	6.42276	15.4459	8.49031e-05	0.011908
wt_h3k4me3.q.05_peak_12316	wt_h3k4me3.q.05_peak_12316	-0.177079	7.06623	15.3817	8.78329e-05	0.0121168
wt_h3k4me3.q.05_peak_15765	wt_h3k4me3.q.05_peak_15765	1.23007	1.65238	15.3741	8.81868e-05	0.0121168
wt_h3k4me3.q.05_peak_14893	wt_h3k4me3.q.05_peak_14893	-0.140979	7.77967	15.3735	8.82173e-05	0.0121168
wt_h3k4me3.q.05_peak_777	wt_h3k4me3.q.05_peak_777	-0.476002	4.21618	15.3272	9.04071e-05	0.0123325
wt_h3k4me3.q.05_peak_12492	wt_h3k4me3.q.05_peak_12492	-1.0925	1.93167	15.2962	9.19028e-05	0.0123983
wt_h3k4me3.q.05_peak_3186	wt_h3k4me3.q.05_peak_3186	0.330041	5.20667	15.2914	9.21346e-05	0.0123983
wt_h3k4me3.q.05_peak_15823	wt_h3k4me3.q.05_peak_15823	-0.946758	3.32344	15.2678	9.32957e-05	0.0124461
wt_h3k4me3.q.05_peak_20170	wt_h3k4me3.q.05_peak_20170	-0.336627	5.1458	15.2588	9.37398e-05	0.0124461
wt_h3k4me3.q.05_peak_13049	wt_h3k4me3.q.05_peak_13049	0.268041	5.98686	15.1933	9.70478e-05	0.0128
wt_h3k4me3.q.05_peak_16547	wt_h3k4me3.q.05_peak_16547	0.651248	3.26966	15.0964	0.000102156	0.0132411
wt_h3k4me3.q.05_peak_14663	wt_h3k4me3.q.05_peak_14663	0.737402	2.93167	15.0831	0.000102879	0.0132411
wt_h3k4me3.q.05_peak_1865	wt_h3k4me3.q.05_peak_1865	-0.244087	6.06918	15.0793	0.00010309	0.0132411
wt_h3k4me3.q.05_peak_15722	wt_h3k4me3.q.05_peak_15722	0.422999	5.30127	15.0768	0.000103222	0.0132411
wt_h3k4me3.q.05_peak_3963	wt_h3k4me3.q.05_peak_3963	-0.142579	7.71157	15.0678	0.000103716	0.0132411
wt_h3k4me3.q.05_peak_20133	wt_h3k4me3.q.05_peak_20133	-0.276564	5.69466	15.0154	0.000106638	0.0135274
wt_h3k4me3.q.05_peak_12108	wt_h3k4me3.q.05_peak_12108	-1.42959	1.26966	14.9666	0.000109434	0.0137348
wt_h3k4me3.q.05_peak_12504	wt_h3k4me3.q.05_peak_12504	-0.242116	6.08093	14.9551	0.000110098	0.0137348
wt_h3k4me3.q.05_peak_12957	wt_h3k4me3.q.05_peak_12957	-1.53271	1.11563	14.951	0.000110342	0.0137348
wt_h3k4me3.q.05_peak_5503	wt_h3k4me3.q.05_peak_5503	0.534543	3.79877	14.92	0.000112168	0.0138628
wt_h3k4me3.q.05_peak_12952	wt_h3k4me3.q.05_peak_12952	0.335983	5.11816	14.9092	0.000112812	0.0138628
wt_h3k4me3.q.05_peak_2330	wt_h3k4me3.q.05_peak_2330	-0.233871	6.17778	14.8946	0.000113687	0.0138628
wt_h3k4me3.q.05_peak_14501	wt_h3k4me3.q.05_peak_14501	-1.21463	1.63831	14.8798	0.000114581	0.0138628
wt_h3k4me3.q.05_peak_42	wt_h3k4me3.q.05_peak_42	-0.744728	2.88475	14.8754	0.00011485	0.0138628
wt_h3k4me3.q.05_peak_5338	wt_h3k4me3.q.05_peak_5338	-0.174204	7.05699	14.7968	0.000119736	0.0141597
wt_h3k4me3.q.05_peak_12077	wt_h3k4me3.q.05_peak_12077	0.474512	5.03868	14.796	0.000119789	0.0141597
wt_h3k4me3.q.05_peak_15258	wt_h3k4me3.q.05_peak_15258	0.586693	3.52812	14.7935	0.000119948	0.0141597
wt_h3k4me3.q.05_peak_12781	wt_h3k4me3.q.05_peak_12781	-0.24187	6.06655	14.7813	0.000120728	0.0141597
wt_h3k4me3.q.05_peak_6214	wt_h3k4me3.q.05_peak_6214	0.310018	5.38479	14.7791	0.000120865	0.0141597
wt_h3k4me3.q.05_peak_13653	wt_h3k4me3.q.05_peak_13653	-0.228474	6.23443	14.7665	0.000121677	0.0141715
wt_h3k4me3.q.05_peak_8151	wt_h3k4me3.q.05_peak_8151	-0.265354	5.79005	14.7511	0.000122677	0.0142048
wt_h3k4me3.q.05_peak_19256	wt_h3k4me3.q.05_peak_19256	-0.608551	3.4171	14.6977	0.000126201	0.0145285
wt_h3k4me3.q.05_peak_16228	wt_h3k4me3.q.05_peak_16228	-0.804797	2.65937	14.6747	0.000127748	0.014622
wt_h3k4me3.q.05_peak_18449	wt_h3k4me3.q.05_peak_18449	-1.83539	0.720772	14.6303	0.000130795	0.0148852
wt_h3k4me3.q.05_peak_17535	wt_h3k4me3.q.05_peak_17535	-0.212052	6.43756	14.5738	0.000134779	0.0152515
wt_h3k4me3.q.05_peak_17549	wt_h3k4me3.q.05_peak_17549	0.195332	6.68312	14.5533	0.000136247	0.0153304
wt_h3k4me3.q.05_peak_13465	wt_h3k4me3.q.05_peak_13465	-0.249703	5.94674	14.529	0.00013802	0.0154345
wt_h3k4me3.q.05_peak_1970	wt_h3k4me3.q.05_peak_1970	-0.346057	4.99379	14.5194	0.000138722	0.0154345
wt_h3k4me3.q.05_peak_33	wt_h3k4me3.q.05_peak_33	-0.725142	2.92008	14.4915	0.000140791	0.0155777
wt_h3k4me3.q.05_peak_12927	wt_h3k4me3.q.05_peak_12927	-1.3238	1.39215	14.3684	0.000150305	0.0165386
wt_h3k4me3.q.05_peak_7275	wt_h3k4me3.q.05_peak_7275	0.561625	3.60613	14.3507	0.000151726	0.0166031
wt_h3k4me3.q.05_peak_12439	wt_h3k4me3.q.05_peak_12439	-0.171234	7.05964	14.3218	0.000154071	0.0167676
wt_h3k4me3.q.05_peak_16734	wt_h3k4me3.q.05_peak_16734	0.223947	6.24723	14.3089	0.000155131	0.0167912
wt_h3k4me3.q.05_peak_401	wt_h3k4me3.q.05_peak_401	0.835528	2.52047	14.2372	0.000161157	0.0173492
wt_h3k4me3.q.05_peak_1462	wt_h3k4me3.q.05_peak_1462	0.196398	6.63121	14.2179	0.000162812	0.0173689
wt_h3k4me3.q.05_peak_437	wt_h3k4me3.q.05_peak_437	0.265739	5.73158	14.2148	0.000163084	0.0173689
wt_h3k4me3.q.05_peak_9783	wt_h3k4me3.q.05_peak_9783	-0.685065	3.0427	14.1734	0.000166708	0.0176404
wt_h3k4me3.q.05_peak_10375	wt_h3k4me3.q.05_peak_10375	-0.219303	6.294	14.1624	0.000167689	0.0176404
wt_h3k4me3.q.05_peak_18350	wt_h3k4me3.q.05_peak_18350	-1.49982	1.09517	14.1557	0.000168291	0.0176404
wt_h3k4me3.q.05_peak_9059	wt_h3k4me3.q.05_peak_9059	-0.706584	2.95457	14.1273	0.000170848	0.0177768
wt_h3k4me3.q.05_peak_12091	wt_h3k4me3.q.05_peak_12091	0.618109	3.31903	14.1215	0.000171377	0.0177768
wt_h3k4me3.q.05_peak_5048	wt_h3k4me3.q.05_peak_5048	0.188999	6.73571	14.1077	0.000172632	0.0177899
wt_h3k4me3.q.05_peak_12086	wt_h3k4me3.q.05_peak_12086	0.323225	6.32012	14.1006	0.00017329	0.0177899
wt_h3k4me3.q.05_peak_1401	wt_h3k4me3.q.05_peak_1401	0.459327	4.89218	14.0712	0.000176019	0.0179774
wt_h3k4me3.q.05_peak_14714	wt_h3k4me3.q.05_peak_14714	-1.63627	0.92008	14.037	0.000179247	0.0181057
wt_h3k4me3.q.05_peak_16750	wt_h3k4me3.q.05_peak_16750	0.267146	5.6972	14.0338	0.000179556	0.0181057
wt_h3k4me3.q.05_peak_11504	wt_h3k4me3.q.05_peak_11504	0.181801	6.84508	14.0291	0.000180003	0.0181057
wt_h3k4me3.q.05_peak_14110	wt_h3k4me3.q.05_peak_14110	-1.07566	1.88475	13.9803	0.000184736	0.0182897
wt_h3k4me3.q.05_peak_17364	wt_h3k4me3.q.05_peak_17364	0.547062	3.64184	13.9777	0.000184995	0.0182897
wt_h3k4me3.q.05_peak_15171	wt_h3k4me3.q.05_peak_15171	0.286553	5.48552	13.972	0.000185558	0.0182897
wt_h3k4me3.q.05_peak_4472	wt_h3k4me3.q.05_peak_4472	0.247006	5.9208	13.9679	0.00018596	0.0182897
wt_h3k4me3.q.05_peak_15097	wt_h3k4me3.q.05_peak_15097	0.187889	6.73778	13.9632	0.000186423	0.0182897
wt_h3k4me3.q.05_peak_13515	wt_h3k4me3.q.05_peak_13515	-0.429973	4.31461	13.9475	0.000187989	0.0183492
wt_h3k4me3.q.05_peak_663	wt_h3k4me3.q.05_peak_663	0.610093	3.33657	13.9387	0.000188873	0.0183492
wt_h3k4me3.q.05_peak_14366	wt_h3k4me3.q.05_peak_14366	-0.139587	7.65283	13.9198	0.000190775	0.0183619
wt_h3k4me3.q.05_peak_15384	wt_h3k4me3.q.05_peak_15384	0.381138	4.65588	13.9191	0.000190848	0.0183619
wt_h3k4me3.q.05_peak_14239	wt_h3k4me3.q.05_peak_14239	-0.320807	5.14828	13.8901	0.000193812	0.0185575
wt_h3k4me3.q.05_peak_4049	wt_h3k4me3.q.05_peak_4049	1.04043	2.10543	13.8603	0.000196919	0.0187437
wt_h3k4me3.q.05_peak_10971	wt_h3k4me3.q.05_peak_10971	-0.328158	5.13832	13.8534	0.000197639	0.0187437
wt_h3k4me3.q.05_peak_9875	wt_h3k4me3.q.05_peak_9875	0.396393	4.53384	13.8237	0.000200784	0.0187582
wt_h3k4me3.q.05_peak_9020	wt_h3k4me3.q.05_peak_9020	-0.837148	2.47368	13.8215	0.000201021	0.0187582
wt_h3k4me3.q.05_peak_4522	wt_h3k4me3.q.05_peak_4522	1.07056	1.84853	13.8124	0.000201994	0.0187582
wt_h3k4me3.q.05_peak_5550	wt_h3k4me3.q.05_peak_5550	0.512304	3.9403	13.8112	0.000202132	0.0187582
wt_h3k4me3.q.05_peak_3201	wt_h3k4me3.q.05_peak_3201	0.224947	6.1808	13.8077	0.000202501	0.0187582
wt_h3k4me3.q.05_peak_17911	wt_h3k4me3.q.05_peak_17911	-0.304411	5.29007	13.7921	0.000204194	0.0188275
wt_h3k4me3.q.05_peak_20215	wt_h3k4me3.q.05_peak_20215	0.444728	4.3322	13.7161	0.00021262	0.0193307
wt_h3k4me3.q.05_peak_742	wt_h3k4me3.q.05_peak_742	-0.293776	5.44567	13.7094	0.000213383	0.0193307
wt_h3k4me3.q.05_peak_6825	wt_h3k4me3.q.05_peak_6825	-0.371493	4.70567	13.6993	0.000214537	0.0193307
wt_h3k4me3.q.05_peak_19985	wt_h3k4me3.q.05_peak_19985	-0.178795	6.85919	13.6985	0.000214628	0.0193307
wt_h3k4me3.q.05_peak_9845	wt_h3k4me3.q.05_peak_9845	-0.22788	6.12891	13.6876	0.000215875	0.0193307
wt_h3k4me3.q.05_peak_11869	wt_h3k4me3.q.05_peak_11869	-1.8664	0.965884	13.6835	0.000216345	0.0193307
wt_h3k4me3.q.05_peak_16035	wt_h3k4me3.q.05_peak_16035	0.255785	5.78526	13.6622	0.00021881	0.0193307
wt_h3k4me3.q.05_peak_8628	wt_h3k4me3.q.05_peak_8628	0.667121	3.06391	13.6559	0.000219548	0.0193307
wt_h3k4me3.q.05_peak_13882	wt_h3k4me3.q.05_peak_13882	0.7374	2.93167	13.6466	0.000220639	0.0193307
wt_h3k4me3.q.05_peak_14943	wt_h3k4me3.q.05_peak_14943	0.45632	4.11563	13.6448	0.000220852	0.0193307
wt_h3k4me3.q.05_peak_3333	wt_h3k4me3.q.05_peak_3333	0.312669	5.1971	13.6434	0.000221017	0.0193307
wt_h3k4me3.q.05_peak_17974	wt_h3k4me3.q.05_peak_17974	-0.564292	3.52047	13.641	0.000221299	0.0193307
wt_h3k4me3.q.05_peak_16961	wt_h3k4me3.q.05_peak_16961	0.137179	7.67539	13.6314	0.000222433	0.0193449
wt_h3k4me3.q.05_peak_922	wt_h3k4me3.q.05_peak_922	-0.730893	2.81137	13.6039	0.000225713	0.0194764
wt_h3k4me3.q.05_peak_6492	wt_h3k4me3.q.05_peak_6492	0.267072	5.6515	13.5975	0.00022649	0.0194764
wt_h3k4me3.q.05_peak_2699	wt_h3k4me3.q.05_peak_2699	-0.26684	5.65326	13.5942	0.00022688	0.0194764
wt_h3k4me3.q.05_peak_19689	wt_h3k4me3.q.05_peak_19689	0.219266	6.23208	13.579	0.000228729	0.0195509
wt_h3k4me3.q.05_peak_17528	wt_h3k4me3.q.05_peak_17528	-1.20551	1.53574	13.5549	0.000231691	0.0197194
wt_h3k4me3.q.05_peak_492	wt_h3k4me3.q.05_peak_492	-1.03545	1.89662	13.4732	0.000241995	0.0205089
wt_h3k4me3.q.05_peak_2761	wt_h3k4me3.q.05_peak_2761	0.250712	5.8223	13.4615	0.00024351	0.0205497
wt_h3k4me3.q.05_peak_13716	wt_h3k4me3.q.05_peak_13716	0.244828	5.89069	13.4468	0.000245431	0.020574
wt_h3k4me3.q.05_peak_12012	wt_h3k4me3.q.05_peak_12012	0.196474	6.54472	13.4372	0.000246677	0.020574
wt_h3k4me3.q.05_peak_16141	wt_h3k4me3.q.05_peak_16141	-1.59818	0.896621	13.4281	0.000247888	0.020574
wt_h3k4me3.q.05_peak_3147	wt_h3k4me3.q.05_peak_3147	0.198886	6.50697	13.4277	0.000247929	0.020574
wt_h3k4me3.q.05_peak_9365	wt_h3k4me3.q.05_peak_9365	0.713808	2.85462	13.396	0.000252163	0.0208241
wt_h3k4me3.q.05_peak_14227	wt_h3k4me3.q.05_peak_14227	-0.426206	4.28104	13.3895	0.000253034	0.0208241
wt_h3k4me3.q.05_peak_3403	wt_h3k4me3.q.05_peak_3403	-1.61632	1.58059	13.3756	0.000254914	0.0208793
wt_h3k4me3.q.05_peak_19151	wt_h3k4me3.q.05_peak_19151	0.29366	5.34958	13.3691	0.000255801	0.0208793
wt_h3k4me3.q.05_peak_13287	wt_h3k4me3.q.05_peak_13287	0.36051	4.96447	13.356	0.000257602	0.0209404
wt_h3k4me3.q.05_peak_8926	wt_h3k4me3.q.05_peak_8926	-0.14995	7.35364	13.2824	0.000267908	0.021567
wt_h3k4me3.q.05_peak_15920	wt_h3k4me3.q.05_peak_15920	-0.310194	5.64184	13.282	0.000267973	0.021567
wt_h3k4me3.q.05_peak_12830	wt_h3k4me3.q.05_peak_12830	0.204817	6.40207	13.2779	0.000268559	0.021567
wt_h3k4me3.q.05_peak_11585	wt_h3k4me3.q.05_peak_11585	-0.195522	6.69679	13.2643	0.00027051	0.0216365
wt_h3k4me3.q.05_peak_14684	wt_h3k4me3.q.05_peak_14684	0.197887	6.50018	13.2329	0.000275076	0.0219137
wt_h3k4me3.q.05_peak_7339	wt_h3k4me3.q.05_peak_7339	-0.17483	6.87316	13.218	0.000277277	0.0219692
wt_h3k4me3.q.05_peak_15736	wt_h3k4me3.q.05_peak_15736	-1.64039	0.823865	13.2132	0.00027798	0.0219692
wt_h3k4me3.q.05_peak_2500	wt_h3k4me3.q.05_peak_2500	0.16119	7.11784	13.1798	0.000282985	0.0220586
wt_h3k4me3.q.05_peak_11060	wt_h3k4me3.q.05_peak_11060	0.537041	3.60974	13.1765	0.000283475	0.0220586
wt_h3k4me3.q.05_peak_13388	wt_h3k4me3.q.05_peak_13388	-1.38844	1.17534	13.1717	0.000284206	0.0220586
wt_h3k4me3.q.05_peak_602	wt_h3k4me3.q.05_peak_602	0.176591	6.8374	13.17	0.000284469	0.0220586
wt_h3k4me3.q.05_peak_12128	wt_h3k4me3.q.05_peak_12128	-0.720275	2.80509	13.1633	0.00028548	0.0220586
wt_h3k4me3.q.05_peak_6548	wt_h3k4me3.q.05_peak_6548	0.188999	6.75419	13.1615	0.000285757	0.0220586
wt_h3k4me3.q.05_peak_20583	wt_h3k4me3.q.05_peak_20583	-0.202572	6.4171	13.1233	0.000291651	0.0224267
wt_h3k4me3.q.05_peak_6982	wt_h3k4me3.q.05_peak_6982	0.327443	5.00617	13.1158	0.000292819	0.0224299
wt_h3k4me3.q.05_peak_13130	wt_h3k4me3.q.05_peak_13130	-0.20826	6.33112	13.097	0.000295762	0.0225685
wt_h3k4me3.q.05_peak_10607	wt_h3k4me3.q.05_peak_10607	0.142474	7.65718	13.0648	0.000300905	0.0228734
wt_h3k4me3.q.05_peak_8757	wt_h3k4me3.q.05_peak_8757	0.801212	3.01573	13.0498	0.000303311	0.0229612
wt_h3k4me3.q.05_peak_19968	wt_h3k4me3.q.05_peak_19968	-0.378119	4.58427	13.0433	0.000304366	0.0229612
wt_h3k4me3.q.05_peak_12594	wt_h3k4me3.q.05_peak_12594	0.510048	3.73737	13.0284	0.000306796	0.0230135
wt_h3k4me3.q.05_peak_19664	wt_h3k4me3.q.05_peak_19664	-0.254964	5.77566	13.0184	0.000308439	0.0230135
wt_h3k4me3.q.05_peak_1683	wt_h3k4me3.q.05_peak_1683	-0.804016	2.49727	13.0122	0.000309463	0.0230135
wt_h3k4me3.q.05_peak_20266	wt_h3k4me3.q.05_peak_20266	-0.493684	4.1207	13.0109	0.000309682	0.0230135
wt_h3k4me3.q.05_peak_16102	wt_h3k4me3.q.05_peak_16102	0.253816	5.73241	12.9803	0.000314778	0.0232327
wt_h3k4me3.q.05_peak_8377	wt_h3k4me3.q.05_peak_8377	0.387531	4.60612	12.979	0.000315011	0.0232327
wt_h3k4me3.q.05_peak_5391	wt_h3k4me3.q.05_peak_5391	0.263262	5.62409	12.9702	0.000316495	0.0232327
wt_h3k4me3.q.05_peak_16808	wt_h3k4me3.q.05_peak_16808	-0.333127	4.93887	12.9617	0.000317925	0.0232327
wt_h3k4me3.q.05_peak_2338	wt_h3k4me3.q.05_peak_2338	0.355295	4.75378	12.9585	0.000318464	0.0232327
wt_h3k4me3.q.05_peak_5358	wt_h3k4me3.q.05_peak_5358	0.212441	6.25359	12.9348	0.000322527	0.0234432
wt_h3k4me3.q.05_peak_5480	wt_h3k4me3.q.05_peak_5480	0.725421	3.08482	12.9184	0.000325374	0.0235319
wt_h3k4me3.q.05_peak_9953	wt_h3k4me3.q.05_peak_9953	-0.570413	3.48552	12.9104	0.000326757	0.0235319
wt_h3k4me3.q.05_peak_1765	wt_h3k4me3.q.05_peak_1765	0.239432	5.89588	12.9074	0.000327292	0.0235319
wt_h3k4me3.q.05_peak_348	wt_h3k4me3.q.05_peak_348	0.435767	4.1631	12.8776	0.00033254	0.0238233
wt_h3k4me3.q.05_peak_14709	wt_h3k4me3.q.05_peak_14709	-0.274083	5.49434	12.8689	0.000334097	0.023849
wt_h3k4me3.q.05_peak_6312	wt_h3k4me3.q.05_peak_6312	-0.270011	5.53669	12.857	0.00033622	0.0238579
wt_h3k4me3.q.05_peak_4298	wt_h3k4me3.q.05_peak_4298	0.192558	6.53858	12.8548	0.000336617	0.0238579
wt_h3k4me3.q.05_peak_18978	wt_h3k4me3.q.05_peak_18978	-0.219714	6.14081	12.8289	0.000341303	0.0241042
wt_h3k4me3.q.05_peak_1386	wt_h3k4me3.q.05_peak_1386	0.30522	5.27422	12.8053	0.000345638	0.0243241
wt_h3k4me3.q.05_peak_19749	wt_h3k4me3.q.05_peak_19749	-0.160832	7.48528	12.783	0.000349779	0.0245149
wt_h3k4me3.q.05_peak_17994	wt_h3k4me3.q.05_peak_17994	0.7063	2.81763	12.7775	0.00035081	0.0245149
wt_h3k4me3.q.05_peak_8117	wt_h3k4me3.q.05_peak_8117	0.341029	4.85005	12.7678	0.000352637	0.0245564
wt_h3k4me3.q.05_peak_11610	wt_h3k4me3.q.05_peak_11610	-0.866871	2.40051	12.737	0.000358497	0.0248774
wt_h3k4me3.q.05_peak_18116	wt_h3k4me3.q.05_peak_18116	-0.133028	7.66221	12.7189	0.000361983	0.0250321
wt_h3k4me3.q.05_peak_4485	wt_h3k4me3.q.05_peak_4485	-0.1962	6.46374	12.7009	0.000365487	0.025187
wt_h3k4me3.q.05_peak_15401	wt_h3k4me3.q.05_peak_15401	-0.275784	5.45373	12.6725	0.000371075	0.0254839
wt_h3k4me3.q.05_peak_5511	wt_h3k4me3.q.05_peak_5511	-1.08719	1.6938	12.6473	0.000376101	0.0256019
wt_h3k4me3.q.05_peak_17714	wt_h3k4me3.q.05_peak_17714	-0.173038	6.83664	12.6417	0.00037723	0.0256019
wt_h3k4me3.q.05_peak_4992	wt_h3k4me3.q.05_peak_4992	-1.28054	1.30573	12.6341	0.000378768	0.0256019
wt_h3k4me3.q.05_peak_2718	wt_h3k4me3.q.05_peak_2718	0.19541	6.46821	12.6334	0.000378916	0.0256019
wt_h3k4me3.q.05_peak_11462	wt_h3k4me3.q.05_peak_11462	0.233204	5.94173	12.6319	0.000379221	0.0256019
wt_h3k4me3.q.05_peak_7934	wt_h3k4me3.q.05_peak_7934	1.03013	1.82386	12.6124	0.000383188	0.0257484
wt_h3k4me3.q.05_peak_19659	wt_h3k4me3.q.05_peak_19659	-1.55905	0.872775	12.6086	0.000383977	0.0257484
wt_h3k4me3.q.05_peak_12801	wt_h3k4me3.q.05_peak_12801	0.436374	4.12827	12.6023	0.000385271	0.0257485
wt_h3k4me3.q.05_peak_16352	wt_h3k4me3.q.05_peak_16352	0.233646	6.70734	12.5952	0.000386729	0.0257595
wt_h3k4me3.q.05_peak_8744	wt_h3k4me3.q.05_peak_8744	-0.414078	4.27423	12.5858	0.000388686	0.0258036
wt_h3k4me3.q.05_peak_14029	wt_h3k4me3.q.05_peak_14029	-0.240497	5.84164	12.5569	0.000394752	0.0261192
wt_h3k4me3.q.05_peak_10632	wt_h3k4me3.q.05_peak_10632	-0.150405	7.25591	12.5483	0.000396568	0.0261525
wt_h3k4me3.q.05_peak_2240	wt_h3k4me3.q.05_peak_2240	0.214552	6.17655	12.529	0.000400687	0.0262496
wt_h3k4me3.q.05_peak_19820	wt_h3k4me3.q.05_peak_19820	-0.180548	6.69338	12.5253	0.000401471	0.0262496
wt_h3k4me3.q.05_peak_995	wt_h3k4me3.q.05_peak_995	-0.305965	5.13456	12.5229	0.000401995	0.0262496
wt_h3k4me3.q.05_peak_17841	wt_h3k4me3.q.05_peak_17841	0.32862	4.92733	12.511	0.000404556	0.0263305
wt_h3k4me3.q.05_peak_19483	wt_h3k4me3.q.05_peak_19483	0.225665	6.02252	12.4935	0.000408375	0.0264925
wt_h3k4me3.q.05_peak_4372	wt_h3k4me3.q.05_peak_4372	0.651846	2.9993	12.4612	0.000415489	0.0268665
wt_h3k4me3.q.05_peak_19905	wt_h3k4me3.q.05_peak_19905	-0.219338	6.10096	12.4473	0.000418591	0.0269795
wt_h3k4me3.q.05_peak_10675	wt_h3k4me3.q.05_peak_10675	0.307217	6.17594	12.417	0.000425442	0.0273243
wt_h3k4me3.q.05_peak_1931	wt_h3k4me3.q.05_peak_1931	0.207328	6.26451	12.4116	0.000426685	0.0273243
wt_h3k4me3.q.05_peak_10618	wt_h3k4me3.q.05_peak_10618	1.18027	1.47368	12.4049	0.000428219	0.0273346
wt_h3k4me3.q.05_peak_18584	wt_h3k4me3.q.05_peak_18584	-0.628851	4.86977	12.3893	0.000431804	0.0274754
wt_h3k4me3.q.05_peak_12817	wt_h3k4me3.q.05_peak_12817	-1.59902	0.798774	12.3787	0.000434251	0.0275431
wt_h3k4me3.q.05_peak_5680	wt_h3k4me3.q.05_peak_5680	0.270259	5.47664	12.3599	0.000438661	0.0276972
wt_h3k4me3.q.05_peak_749	wt_h3k4me3.q.05_peak_749	-0.797024	2.4497	12.3565	0.000439462	0.0276972
wt_h3k4me3.q.05_peak_4547	wt_h3k4me3.q.05_peak_4547	0.176	6.74642	12.3237	0.000447236	0.0280983
wt_h3k4me3.q.05_peak_20201	wt_h3k4me3.q.05_peak_20201	0.237436	5.92516	12.3081	0.000450989	0.028245
wt_h3k4me3.q.05_peak_12271	wt_h3k4me3.q.05_peak_12271	-0.320809	4.96729	12.2646	0.00046163	0.0288208
wt_h3k4me3.q.05_peak_13997	wt_h3k4me3.q.05_peak_13997	0.222419	6.13392	12.2561	0.000463731	0.0288615
wt_h3k4me3.q.05_peak_18401	wt_h3k4me3.q.05_peak_18401	0.542698	3.47368	12.2146	0.00047417	0.0293342
wt_h3k4me3.q.05_peak_16776	wt_h3k4me3.q.05_peak_16776	0.265355	5.51277	12.2142	0.000474272	0.0293342
wt_h3k4me3.q.05_peak_11345	wt_h3k4me3.q.05_peak_11345	0.399282	4.3322	12.1885	0.000480846	0.0295991
wt_h3k4me3.q.05_peak_7588	wt_h3k4me3.q.05_peak_7588	-0.131125	7.6392	12.1815	0.000482667	0.0295991
wt_h3k4me3.q.05_peak_16280	wt_h3k4me3.q.05_peak_16280	-0.482619	3.79561	12.1801	0.000483014	0.0295991
wt_h3k4me3.q.05_peak_6304	wt_h3k4me3.q.05_peak_6304	-0.50265	3.68013	12.1646	0.000487049	0.0296877
wt_h3k4me3.q.05_peak_12097	wt_h3k4me3.q.05_peak_12097	0.63647	3.67669	12.1619	0.000487761	0.0296877
wt_h3k4me3.q.05_peak_18999	wt_h3k4me3.q.05_peak_18999	0.16966	6.83701	12.1574	0.000488932	0.0296877
wt_h3k4me3.q.05_peak_6845	wt_h3k4me3.q.05_peak_6845	-0.161218	6.99207	12.1511	0.00049059	0.0296978
wt_h3k4me3.q.05_peak_4787	wt_h3k4me3.q.05_peak_4787	0.480994	3.79877	12.1197	0.000498926	0.0301109
wt_h3k4me3.q.05_peak_12164	wt_h3k4me3.q.05_peak_12164	-0.166535	6.88624	12.0995	0.000504362	0.0303471
wt_h3k4me3.q.05_peak_7790	wt_h3k4me3.q.05_peak_7790	0.777529	2.66632	12.0935	0.000505988	0.0303532
wt_h3k4me3.q.05_peak_1372	wt_h3k4me3.q.05_peak_1372	0.219744	6.05135	12.0803	0.000509582	0.030477
wt_h3k4me3.q.05_peak_2996	wt_h3k4me3.q.05_peak_2996	0.273489	5.40675	12.0661	0.000513484	0.0306184
wt_h3k4me3.q.05_peak_20344	wt_h3k4me3.q.05_peak_20344	-0.205394	6.24724	12.0443	0.000519506	0.0307988
wt_h3k4me3.q.05_peak_15227	wt_h3k4me3.q.05_peak_15227	-0.301712	5.11817	12.0429	0.000519887	0.0307988
wt_h3k4me3.q.05_peak_7223	wt_h3k4me3.q.05_peak_7223	-0.218345	6.06392	12.0319	0.000522976	0.0307988
wt_h3k4me3.q.05_peak_10684	wt_h3k4me3.q.05_peak_10684	-0.214475	6.11627	12.026	0.000524632	0.0307988
wt_h3k4me3.q.05_peak_4951	wt_h3k4me3.q.05_peak_4951	0.293567	5.1947	12.0161	0.000527432	0.0307988
wt_h3k4me3.q.05_peak_14131	wt_h3k4me3.q.05_peak_14131	-0.199431	6.33112	12.0116	0.000528693	0.0307988
wt_h3k4me3.q.05_peak_1328	wt_h3k4me3.q.05_peak_1328	-1.30771	1.1947	12.0102	0.000529094	0.0307988
wt_h3k4me3.q.05_peak_10030	wt_h3k4me3.q.05_peak_10030	-1.30771	1.1947	12.0102	0.000529094	0.0307988
wt_h3k4me3.q.05_peak_8035	wt_h3k4me3.q.05_peak_8035	0.393832	4.41296	12.0055	0.000530428	0.0307988
wt_h3k4me3.q.05_peak_13750	wt_h3k4me3.q.05_peak_13750	0.24546	5.95456	11.9855	0.000536152	0.0310407
wt_h3k4me3.q.05_peak_4650	wt_h3k4me3.q.05_peak_4650	-0.99591	1.83625	11.9605	0.000543399	0.0313244
wt_h3k4me3.q.05_peak_18809	wt_h3k4me3.q.05_peak_18809	-0.13842	7.43934	11.9578	0.000544197	0.0313244
wt_h3k4me3.q.05_peak_16800	wt_h3k4me3.q.05_peak_16800	-1.25102	1.28781	11.9368	0.000550353	0.0315874
wt_h3k4me3.q.05_peak_6617	wt_h3k4me3.q.05_peak_6617	-0.146898	7.25043	11.9291	0.000552625	0.0315921
wt_h3k4me3.q.05_peak_10239	wt_h3k4me3.q.05_peak_10239	-0.845349	2.54331	11.9258	0.000553607	0.0315921
wt_h3k4me3.q.05_peak_1350	wt_h3k4me3.q.05_peak_1350	0.711486	2.70059	11.9058	0.000559596	0.0318426
wt_h3k4me3.q.05_peak_2794	wt_h3k4me3.q.05_peak_2794	0.170234	6.79322	11.8922	0.000563684	0.0319838
wt_h3k4me3.q.05_peak_13566	wt_h3k4me3.q.05_peak_13566	-0.186373	6.51615	11.869	0.00057077	0.032258
wt_h3k4me3.q.05_peak_8279	wt_h3k4me3.q.05_peak_8279	-1.56125	0.965884	11.8658	0.000571755	0.032258
wt_h3k4me3.q.05_peak_11566	wt_h3k4me3.q.05_peak_11566	-0.149802	7.18021	11.8558	0.000574809	0.0323387
wt_h3k4me3.q.05_peak_10542	wt_h3k4me3.q.05_peak_10542	-1.3451	1.72077	11.8462	0.000577792	0.0324149
wt_h3k4me3.q.05_peak_6605	wt_h3k4me3.q.05_peak_6605	-0.121969	7.82426	11.8344	0.000581449	0.0324436
wt_h3k4me3.q.05_peak_15386	wt_h3k4me3.q.05_peak_15386	0.379628	4.43349	11.8341	0.00058156	0.0324436
wt_h3k4me3.q.05_peak_1565	wt_h3k4me3.q.05_peak_1565	0.123197	7.79004	11.8178	0.000586671	0.0326245
wt_h3k4me3.q.05_peak_3519	wt_h3k4me3.q.05_peak_3519	-1.51883	0.848527	11.803	0.000591356	0.0326245
wt_h3k4me3.q.05_peak_12443	wt_h3k4me3.q.05_peak_12443	-1.51883	0.848527	11.803	0.000591356	0.0326245
wt_h3k4me3.q.05_peak_10404	wt_h3k4me3.q.05_peak_10404	-1.51883	0.848527	11.803	0.000591357	0.0326245
wt_h3k4me3.q.05_peak_5539	wt_h3k4me3.q.05_peak_5539	0.803319	2.36676	11.7919	0.000594876	0.032728
wt_h3k4me3.q.05_peak_17034	wt_h3k4me3.q.05_peak_17034	0.422928	4.1207	11.7833	0.00059766	0.0327651
wt_h3k4me3.q.05_peak_14375	wt_h3k4me3.q.05_peak_14375	-0.191638	6.42122	11.7796	0.000598841	0.0327651
wt_h3k4me3.q.05_peak_18974	wt_h3k4me3.q.05_peak_18974	-0.507223	3.60613	11.7525	0.00060761	0.0331538
wt_h3k4me3.q.05_peak_10143	wt_h3k4me3.q.05_peak_10143	-0.491729	3.6904	11.7339	0.000613708	0.0333951
wt_h3k4me3.q.05_peak_642	wt_h3k4me3.q.05_peak_642	0.231518	5.85234	11.7207	0.000618089	0.0335419
wt_h3k4me3.q.05_peak_4976	wt_h3k4me3.q.05_peak_4976	-1.06663	1.63831	11.6939	0.000627061	0.0339363
wt_h3k4me3.q.05_peak_7175	wt_h3k4me3.q.05_peak_7175	0.209448	6.28893	11.6765	0.000632946	0.0340878
wt_h3k4me3.q.05_peak_16767	wt_h3k4me3.q.05_peak_16767	0.1928	6.39004	11.6755	0.000633284	0.0340878
wt_h3k4me3.q.05_peak_14155	wt_h3k4me3.q.05_peak_14155	-0.127084	7.67044	11.6681	0.000635825	0.0340906
wt_h3k4me3.q.05_peak_13111	wt_h3k4me3.q.05_peak_13111	0.26713	5.51374	11.6653	0.000636759	0.0340906
wt_h3k4me3.q.05_peak_6683	wt_h3k4me3.q.05_peak_6683	-0.204339	6.21263	11.6481	0.000642689	0.0343158
wt_h3k4me3.q.05_peak_15864	wt_h3k4me3.q.05_peak_15864	0.147176	7.20607	11.634	0.000647558	0.0344833
wt_h3k4me3.q.05_peak_9335	wt_h3k4me3.q.05_peak_9335	0.27975	5.28555	11.6178	0.000653222	0.0346302
wt_h3k4me3.q.05_peak_4061	wt_h3k4me3.q.05_peak_4061	-0.115382	7.97152	11.6067	0.000657153	0.0346302
wt_h3k4me3.q.05_peak_19036	wt_h3k4me3.q.05_peak_19036	-0.180478	6.5783	11.6003	0.000659423	0.0346302
wt_h3k4me3.q.05_peak_13414	wt_h3k4me3.q.05_peak_13414	0.336741	4.74724	11.5969	0.000660605	0.0346302
wt_h3k4me3.q.05_peak_1516	wt_h3k4me3.q.05_peak_1516	0.707301	2.68013	11.5965	0.000660775	0.0346302
wt_h3k4me3.q.05_peak_67	wt_h3k4me3.q.05_peak_67	0.380114	4.40051	11.595	0.000661301	0.0346302
wt_h3k4me3.q.05_peak_8647	wt_h3k4me3.q.05_peak_8647	-1.12939	1.48945	11.5901	0.000663039	0.0346302
wt_h3k4me3.q.05_peak_17049	wt_h3k4me3.q.05_peak_17049	0.221197	6.37102	11.5843	0.000665108	0.0346302
wt_h3k4me3.q.05_peak_8874	wt_h3k4me3.q.05_peak_8874	-0.0982672	8.49752	11.5819	0.000665965	0.0346302
wt_h3k4me3.q.05_peak_7843	wt_h3k4me3.q.05_peak_7843	-1.42015	0.965884	11.5588	0.000674309	0.0349573
wt_h3k4me3.q.05_peak_4633	wt_h3k4me3.q.05_peak_4633	0.169154	6.7688	11.5547	0.000675766	0.0349573
wt_h3k4me3.q.05_peak_9885	wt_h3k4me3.q.05_peak_9885	0.182855	6.53241	11.5476	0.000678364	0.0350007
wt_h3k4me3.q.05_peak_11858	wt_h3k4me3.q.05_peak_11858	-0.333414	4.88624	11.5395	0.000681328	0.0350629
wt_h3k4me3.q.05_peak_14917	wt_h3k4me3.q.05_peak_14917	-0.190609	6.4052	11.5303	0.0006847	0.0351456
wt_h3k4me3.q.05_peak_14415	wt_h3k4me3.q.05_peak_14415	0.782348	2.40051	11.4881	0.000700432	0.0358607
wt_h3k4me3.q.05_peak_18232	wt_h3k4me3.q.05_peak_18232	-0.144853	7.37236	11.4792	0.000703797	0.0359406
wt_h3k4me3.q.05_peak_6115	wt_h3k4me3.q.05_peak_6115	0.352986	4.59524	11.4616	0.000710476	0.0361889
wt_h3k4me3.q.05_peak_5228	wt_h3k4me3.q.05_peak_5228	-0.844817	2.89662	11.446	0.000716468	0.036401
wt_h3k4me3.q.05_peak_189	wt_h3k4me3.q.05_peak_189	-1.56125	0.965884	11.4241	0.00072499	0.0366754
wt_h3k4me3.q.05_peak_20408	wt_h3k4me3.q.05_peak_20408	-0.218536	6.79125	11.4226	0.000725553	0.0366754
wt_h3k4me3.q.05_peak_1015	wt_h3k4me3.q.05_peak_1015	0.245025	5.64536	11.4053	0.000732359	0.0369257
wt_h3k4me3.q.05_peak_12219	wt_h3k4me3.q.05_peak_12219	-0.232992	5.85919	11.3888	0.000738863	0.0371596
wt_h3k4me3.q.05_peak_3528	wt_h3k4me3.q.05_peak_3528	-0.23444	5.77163	11.3818	0.000741655	0.0371622
wt_h3k4me3.q.05_peak_4245	wt_h3k4me3.q.05_peak_4245	0.628614	2.97151	11.3794	0.000742646	0.0371622
wt_h3k4me3.q.05_peak_17879	wt_h3k4me3.q.05_peak_17879	0.537054	3.40051	11.3602	0.000750356	0.0373141
wt_h3k4me3.q.05_peak_5101	wt_h3k4me3.q.05_peak_5101	-1.06881	1.59524	11.3544	0.000752713	0.0373141
wt_h3k4me3.q.05_peak_16372	wt_h3k4me3.q.05_peak_16372	-1.34081	1.07441	11.3498	0.000754549	0.0373141
wt_h3k4me3.q.05_peak_7048	wt_h3k4me3.q.05_peak_7048	0.528094	3.44566	11.3489	0.000754947	0.0373141
wt_h3k4me3.q.05_peak_15079	wt_h3k4me3.q.05_peak_15079	0.418863	4.53763	11.346	0.000756123	0.0373141
wt_h3k4me3.q.05_peak_2173	wt_h3k4me3.q.05_peak_2173	-0.229027	5.83548	11.344	0.000756923	0.0373141
wt_h3k4me3.q.05_peak_18101	wt_h3k4me3.q.05_peak_18101	-0.174745	6.64052	11.3309	0.000762267	0.0374847
wt_h3k4me3.q.05_peak_8443	wt_h3k4me3.q.05_peak_8443	0.461276	3.81763	11.308	0.000771731	0.0377714
wt_h3k4me3.q.05_peak_18698	wt_h3k4me3.q.05_peak_18698	0.154094	7.28809	11.3076	0.00077189	0.0377714
wt_h3k4me3.q.05_peak_18905	wt_h3k4me3.q.05_peak_18905	0.192482	6.34526	11.2947	0.000777292	0.0379425
wt_h3k4me3.q.05_peak_15061	wt_h3k4me3.q.05_peak_15061	-0.201483	6.20728	11.2846	0.000781508	0.0379774
wt_h3k4me3.q.05_peak_966	wt_h3k4me3.q.05_peak_966	-0.14029	7.30658	11.2801	0.000783436	0.0379774
wt_h3k4me3.q.05_peak_3593	wt_h3k4me3.q.05_peak_3593	-0.176494	6.60342	11.2794	0.000783726	0.0379774
wt_h3k4me3.q.05_peak_20316	wt_h3k4me3.q.05_peak_20316	0.312777	4.91862	11.2729	0.00078647	0.0380178
wt_h3k4me3.q.05_peak_17372	wt_h3k4me3.q.05_peak_17372	0.248786	5.58243	11.2643	0.000790107	0.0380348
wt_h3k4me3.q.05_peak_2839	wt_h3k4me3.q.05_peak_2839	0.197969	6.25705	11.2628	0.000790745	0.0380348
wt_h3k4me3.q.05_peak_9862	wt_h3k4me3.q.05_peak_9862	-0.262333	5.42634	11.2586	0.000792552	0.0380348
wt_h3k4me3.q.05_peak_17479	wt_h3k4me3.q.05_peak_17479	-1.2386	1.50504	11.2446	0.00079853	0.0380858
wt_h3k4me3.q.05_peak_13828	wt_h3k4me3.q.05_peak_13828	-0.212983	6.03668	11.2421	0.000799628	0.0380858
wt_h3k4me3.q.05_peak_16055	wt_h3k4me3.q.05_peak_16055	-1.17438	1.3582	11.2387	0.000801092	0.0380858
wt_h3k4me3.q.05_peak_7101	wt_h3k4me3.q.05_peak_7101	-0.650466	2.8607	11.2383	0.000801262	0.0380858
wt_h3k4me3.q.05_peak_20470	wt_h3k4me3.q.05_peak_20470	-0.205231	6.14518	11.2309	0.000804479	0.0381476
wt_h3k4me3.q.05_peak_11889	wt_h3k4me3.q.05_peak_11889	0.530522	3.41709	11.2216	0.000808491	0.0381745
wt_h3k4me3.q.05_peak_19690	wt_h3k4me3.q.05_peak_19690	0.343454	4.70566	11.2207	0.00080888	0.0381745
wt_h3k4me3.q.05_peak_14463	wt_h3k4me3.q.05_peak_14463	-0.178935	6.55273	11.2103	0.000813428	0.0382984
wt_h3k4me3.q.05_peak_16362	wt_h3k4me3.q.05_peak_16362	0.484532	3.69039	11.1913	0.000821805	0.0386016
wt_h3k4me3.q.05_peak_6418	wt_h3k4me3.q.05_peak_6418	0.427888	4.53384	11.1832	0.000825418	0.0386801
wt_h3k4me3.q.05_peak_19	wt_h3k4me3.q.05_peak_19	0.722116	3.3582	11.1625	0.000834671	0.0390218
wt_h3k4me3.q.05_peak_10238	wt_h3k4me3.q.05_peak_10238	-0.193505	6.30907	11.1446	0.000842754	0.0392661
wt_h3k4me3.q.05_peak_5752	wt_h3k4me3.q.05_peak_5752	-0.187267	6.40676	11.1422	0.00084384	0.0392661
wt_h3k4me3.q.05_peak_2262	wt_h3k4me3.q.05_peak_2262	-0.185151	6.43959	11.1329	0.000848101	0.0393725
wt_h3k4me3.q.05_peak_18705	wt_h3k4me3.q.05_peak_18705	0.931543	1.9084	11.1196	0.000854224	0.0395645
wt_h3k4me3.q.05_peak_19913	wt_h3k4me3.q.05_peak_19913	0.465062	3.76678	11.0876	0.000869087	0.0401595
wt_h3k4me3.q.05_peak_13938	wt_h3k4me3.q.05_peak_13938	-0.231432	5.77002	11.0804	0.000872449	0.0402215
wt_h3k4me3.q.05_peak_12772	wt_h3k4me3.q.05_peak_12772	0.383268	4.30796	11.0504	0.000886669	0.0407025
wt_h3k4me3.q.05_peak_18083	wt_h3k4me3.q.05_peak_18083	0.819762	2.48944	11.0498	0.000886969	0.0407025
wt_h3k4me3.q.05_peak_762	wt_h3k4me3.q.05_peak_762	0.515805	3.47763	11.0205	0.000901113	0.0411048
wt_h3k4me3.q.05_peak_2238	wt_h3k4me3.q.05_peak_2238	-1.47746	0.823865	11.0119	0.000905265	0.0411048
wt_h3k4me3.q.05_peak_6576	wt_h3k4me3.q.05_peak_6576	-1.47746	0.823865	11.0119	0.000905265	0.0411048
wt_h3k4me3.q.05_peak_4144	wt_h3k4me3.q.05_peak_4144	-1.47746	0.823865	11.0119	0.000905266	0.0411048
wt_h3k4me3.q.05_peak_10805	wt_h3k4me3.q.05_peak_10805	0.556094	3.2605	11.0103	0.000906056	0.0411048
wt_h3k4me3.q.05_peak_5476	wt_h3k4me3.q.05_peak_5476	0.871257	2.06391	11.0035	0.000909405	0.041163
wt_h3k4me3.q.05_peak_20278	wt_h3k4me3.q.05_peak_20278	-0.203413	6.14019	10.9958	0.000913209	0.0412319
wt_h3k4me3.q.05_peak_15235	wt_h3k4me3.q.05_peak_15235	-0.145846	7.1458	10.9919	0.000915104	0.0412319
wt_h3k4me3.q.05_peak_16596	wt_h3k4me3.q.05_peak_16596	-1.28975	1.11563	10.9878	0.000917138	0.0412319
wt_h3k4me3.q.05_peak_5295	wt_h3k4me3.q.05_peak_5295	-0.0613501	9.94706	10.9508	0.000935638	0.0419072
wt_h3k4me3.q.05_peak_13126	wt_h3k4me3.q.05_peak_13126	0.235581	5.70059	10.949	0.000936566	0.0419072
wt_h3k4me3.q.05_peak_10960	wt_h3k4me3.q.05_peak_10960	-0.173065	6.61694	10.9436	0.000939256	0.0419072
wt_h3k4me3.q.05_peak_13368	wt_h3k4me3.q.05_peak_13368	-0.326744	4.74888	10.9395	0.00094138	0.0419072
wt_h3k4me3.q.05_peak_3034	wt_h3k4me3.q.05_peak_3034	-0.995194	1.72077	10.9369	0.00094268	0.0419072
wt_h3k4me3.q.05_peak_1044	wt_h3k4me3.q.05_peak_1044	0.392717	4.22327	10.9313	0.000945512	0.0419207
wt_h3k4me3.q.05_peak_18177	wt_h3k4me3.q.05_peak_18177	0.358587	4.48158	10.928	0.000947194	0.0419207
wt_h3k4me3.q.05_peak_6026	wt_h3k4me3.q.05_peak_6026	0.185222	6.40727	10.9019	0.000960667	0.0424227
wt_h3k4me3.q.05_peak_10371	wt_h3k4me3.q.05_peak_10371	-0.311739	5.08353	10.8764	0.000973978	0.0429012
wt_h3k4me3.q.05_peak_12918	wt_h3k4me3.q.05_peak_12918	0.209144	6.04136	10.8729	0.000975811	0.0429012
wt_h3k4me3.q.05_peak_14367	wt_h3k4me3.q.05_peak_14367	0.390063	4.23267	10.8566	0.000984457	0.0430793
wt_h3k4me3.q.05_peak_19364	wt_h3k4me3.q.05_peak_19364	-0.212172	5.99518	10.8487	0.000988659	0.0430793
wt_h3k4me3.q.05_peak_17771	wt_h3k4me3.q.05_peak_17771	-0.667855	2.74067	10.8467	0.000989726	0.0430793
wt_h3k4me3.q.05_peak_9881	wt_h3k4me3.q.05_peak_9881	0.461516	3.75704	10.8466	0.000989779	0.0430793
wt_h3k4me3.q.05_peak_19168	wt_h3k4me3.q.05_peak_19168	-0.164076	6.94066	10.8423	0.000992079	0.0430793
wt_h3k4me3.q.05_peak_9606	wt_h3k4me3.q.05_peak_9606	-0.591407	3.06917	10.8409	0.000992839	0.0430793
wt_h3k4me3.q.05_peak_5275	wt_h3k4me3.q.05_peak_5275	0.201965	6.13518	10.8012	0.00101433	0.043916
wt_h3k4me3.q.05_peak_3143	wt_h3k4me3.q.05_peak_3143	-0.287409	5.09903	10.7905	0.0010202	0.0440746
wt_h3k4me3.q.05_peak_16078	wt_h3k4me3.q.05_peak_16078	-0.226895	5.78846	10.7857	0.00102288	0.0440801
wt_h3k4me3.q.05_peak_8636	wt_h3k4me3.q.05_peak_8636	0.202777	6.1207	10.7823	0.00102476	0.0440801
wt_h3k4me3.q.05_peak_1603	wt_h3k4me3.q.05_peak_1603	-1.27555	1.17534	10.7743	0.00102918	0.0441749
wt_h3k4me3.q.05_peak_3782	wt_h3k4me3.q.05_peak_3782	-1.51254	0.747244	10.7536	0.00104078	0.0444638
wt_h3k4me3.q.05_peak_8408	wt_h3k4me3.q.05_peak_8408	0.192693	6.31958	10.7453	0.00104544	0.0444638
wt_h3k4me3.q.05_peak_19226	wt_h3k4me3.q.05_peak_19226	-0.229207	5.75297	10.7444	0.00104596	0.0444638
wt_h3k4me3.q.05_peak_2968	wt_h3k4me3.q.05_peak_2968	-0.634233	2.86675	10.7442	0.00104606	0.0444638
wt_h3k4me3.q.05_peak_17016	wt_h3k4me3.q.05_peak_17016	0.551846	3.24665	10.7391	0.00104895	0.0444638
wt_h3k4me3.q.05_peak_4652	wt_h3k4me3.q.05_peak_4652	-0.894472	3.83933	10.7385	0.00104931	0.0444638
wt_h3k4me3.q.05_peak_19787	wt_h3k4me3.q.05_peak_19787	-0.249932	5.49629	10.7232	0.00105802	0.0446515
wt_h3k4me3.q.05_peak_3602	wt_h3k4me3.q.05_peak_3602	0.196181	6.21084	10.7228	0.00105822	0.0446515
wt_h3k4me3.q.05_peak_3080	wt_h3k4me3.q.05_peak_3080	0.44791	3.89662	10.7117	0.00106459	0.0448073
wt_h3k4me3.q.05_peak_4744	wt_h3k4me3.q.05_peak_4744	0.308565	4.88325	10.7086	0.00106641	0.0448073
wt_h3k4me3.q.05_peak_927	wt_h3k4me3.q.05_peak_927	-0.210677	5.99587	10.702	0.0010702	0.0448716
wt_h3k4me3.q.05_peak_6240	wt_h3k4me3.q.05_peak_6240	-0.101984	8.23896	10.6811	0.00108236	0.045104
wt_h3k4me3.q.05_peak_6752	wt_h3k4me3.q.05_peak_6752	-1.30551	1.05335	10.6769	0.0010848	0.045104
wt_h3k4me3.q.05_peak_7171	wt_h3k4me3.q.05_peak_7171	-1.30551	1.05335	10.6769	0.0010848	0.045104
wt_h3k4me3.q.05_peak_15347	wt_h3k4me3.q.05_peak_15347	-1.30551	1.05335	10.6769	0.0010848	0.045104
wt_h3k4me3.q.05_peak_12102	wt_h3k4me3.q.05_peak_12102	-0.617385	3.13581	10.6638	0.00109251	0.0453299
wt_h3k4me3.q.05_peak_17363	wt_h3k4me3.q.05_peak_17363	0.3111	4.97851	10.6576	0.00109621	0.045389
wt_h3k4me3.q.05_peak_8570	wt_h3k4me3.q.05_peak_8570	0.159979	6.81294	10.6408	0.00110618	0.0457067
wt_h3k4me3.q.05_peak_14122	wt_h3k4me3.q.05_peak_14122	-0.236896	5.64096	10.6346	0.00110994	0.0457673
wt_h3k4me3.q.05_peak_19192	wt_h3k4me3.q.05_peak_19192	0.215971	5.91205	10.6244	0.00111604	0.0459236
wt_h3k4me3.q.05_peak_19748	wt_h3k4me3.q.05_peak_19748	-0.935046	1.83625	10.6141	0.00112229	0.0460106
wt_h3k4me3.q.05_peak_12684	wt_h3k4me3.q.05_peak_12684	-1.39297	1.37528	10.6118	0.00112366	0.0460106
wt_h3k4me3.q.05_peak_17325	wt_h3k4me3.q.05_peak_17325	-1.24267	1.15571	10.6063	0.00112704	0.0460106
wt_h3k4me3.q.05_peak_5906	wt_h3k4me3.q.05_peak_5906	-0.162269	6.76396	10.6025	0.00112934	0.0460106
wt_h3k4me3.q.05_peak_12770	wt_h3k4me3.q.05_peak_12770	0.620528	2.9084	10.6019	0.0011297	0.0460106
wt_h3k4me3.q.05_peak_1301	wt_h3k4me3.q.05_peak_1301	0.17346	6.5616	10.5962	0.00113318	0.0460581
wt_h3k4me3.q.05_peak_971	wt_h3k4me3.q.05_peak_971	-1.1901	1.25129	10.5793	0.0011436	0.0462925
wt_h3k4me3.q.05_peak_19511	wt_h3k4me3.q.05_peak_19511	-1.1901	1.25129	10.5793	0.0011436	0.0462925
wt_h3k4me3.q.05_peak_18470	wt_h3k4me3.q.05_peak_18470	0.232252	5.68954	10.5629	0.00115381	0.0466112
wt_h3k4me3.q.05_peak_6061	wt_h3k4me3.q.05_peak_6061	0.117682	7.75561	10.5526	0.00116022	0.0467751
wt_h3k4me3.q.05_peak_3372	wt_h3k4me3.q.05_peak_3372	0.151039	6.97431	10.5428	0.0011664	0.0468232
wt_h3k4me3.q.05_peak_4078	wt_h3k4me3.q.05_peak_4078	0.139109	7.2268	10.5376	0.00116969	0.0468232
wt_h3k4me3.q.05_peak_852	wt_h3k4me3.q.05_peak_852	0.383261	4.23968	10.536	0.00117074	0.0468232
wt_h3k4me3.q.05_peak_15649	wt_h3k4me3.q.05_peak_15649	-0.274827	5.42634	10.5352	0.00117123	0.0468232
wt_h3k4me3.q.05_peak_14942	wt_h3k4me3.q.05_peak_14942	-0.210081	5.98061	10.5321	0.00117317	0.0468232
wt_h3k4me3.q.05_peak_17361	wt_h3k4me3.q.05_peak_17361	0.880761	1.97711	10.5251	0.00117764	0.0469079
wt_h3k4me3.q.05_peak_16687	wt_h3k4me3.q.05_peak_16687	0.24453	5.53098	10.5086	0.00118819	0.0472337
wt_h3k4me3.q.05_peak_10178	wt_h3k4me3.q.05_peak_10178	-0.361463	4.40051	10.4982	0.00119492	0.0474066
wt_h3k4me3.q.05_peak_6342	wt_h3k4me3.q.05_peak_6342	-0.504995	3.45774	10.4881	0.00120148	0.0475344
wt_h3k4me3.q.05_peak_1421	wt_h3k4me3.q.05_peak_1421	-0.144521	7.10128	10.4854	0.00120324	0.0475344
wt_h3k4me3.q.05_peak_12864	wt_h3k4me3.q.05_peak_12864	0.807346	2.1947	10.4822	0.00120531	0.0475344
wt_h3k4me3.q.05_peak_12984	wt_h3k4me3.q.05_peak_12984	0.56672	3.13581	10.4525	0.00122483	0.0480833
wt_h3k4me3.q.05_peak_6178	wt_h3k4me3.q.05_peak_6178	-0.173153	6.54568	10.4502	0.00122633	0.0480833
wt_h3k4me3.q.05_peak_1381	wt_h3k4me3.q.05_peak_1381	-0.67189	2.67324	10.45	0.00122647	0.0480833
wt_h3k4me3.q.05_peak_3398	wt_h3k4me3.q.05_peak_3398	-0.16144	6.75665	10.4453	0.00122959	0.0481109
wt_h3k4me3.q.05_peak_595	wt_h3k4me3.q.05_peak_595	-0.275507	5.1729	10.4356	0.00123607	0.0482444
wt_h3k4me3.q.05_peak_4934	wt_h3k4me3.q.05_peak_4934	0.241068	5.56207	10.433	0.00123784	0.0482444
wt_h3k4me3.q.05_peak_4397	wt_h3k4me3.q.05_peak_4397	-1.55329	0.666324	10.4242	0.00124378	0.0483811
wt_h3k4me3.q.05_peak_16576	wt_h3k4me3.q.05_peak_16576	0.662639	2.70735	10.4191	0.00124718	0.0484186
wt_h3k4me3.q.05_peak_11159	wt_h3k4me3.q.05_peak_11159	0.308959	4.83932	10.4152	0.00124982	0.0484195
wt_h3k4me3.q.05_peak_15102	wt_h3k4me3.q.05_peak_15102	-0.916567	1.8607	10.4102	0.00125322	0.0484195
wt_h3k4me3.q.05_peak_10653	wt_h3k4me3.q.05_peak_10653	-1.04577	1.53574	10.4083	0.00125449	0.0484195
wt_h3k4me3.q.05_peak_20555	wt_h3k4me3.q.05_peak_20555	0.43025	3.89366	10.3957	0.00126307	0.0485586
wt_h3k4me3.q.05_peak_14481	wt_h3k4me3.q.05_peak_14481	0.161987	6.73902	10.3925	0.00126525	0.0485586
wt_h3k4me3.q.05_peak_15242	wt_h3k4me3.q.05_peak_15242	0.205104	6.03197	10.3923	0.00126541	0.0485586
wt_h3k4me3.q.05_peak_9909	wt_h3k4me3.q.05_peak_9909	0.89443	1.92008	10.3827	0.00127203	0.0487186
wt_h3k4me3.q.05_peak_11508	wt_h3k4me3.q.05_peak_11508	0.196629	6.15509	10.3766	0.0012762	0.0487469
wt_h3k4me3.q.05_peak_10745	wt_h3k4me3.q.05_peak_10745	-0.379549	4.24434	10.3728	0.00127883	0.0487469
wt_h3k4me3.q.05_peak_17971	wt_h3k4me3.q.05_peak_17971	-0.79063	2.23267	10.3655	0.00128391	0.0487469
wt_h3k4me3.q.05_peak_7943	wt_h3k4me3.q.05_peak_7943	-0.467917	3.77967	10.364	0.00128499	0.0487469
wt_h3k4me3.q.05_peak_10551	wt_h3k4me3.q.05_peak_10551	-0.884935	1.94316	10.3625	0.001286	0.0487469
wt_h3k4me3.q.05_peak_10725	wt_h3k4me3.q.05_peak_10725	0.776507	2.27877	10.3502	0.00129462	0.0487469
wt_h3k4me3.q.05_peak_2000	wt_h3k4me3.q.05_peak_2000	0.234149	5.63565	10.3501	0.0012947	0.0487469
wt_h3k4me3.q.05_peak_353	wt_h3k4me3.q.05_peak_353	-0.134047	7.31379	10.3492	0.00129529	0.0487469
wt_h3k4me3.q.05_peak_2451	wt_h3k4me3.q.05_peak_2451	0.434326	3.8607	10.3487	0.00129564	0.0487469
wt_h3k4me3.q.05_peak_697	wt_h3k4me3.q.05_peak_697	0.197202	6.14205	10.3464	0.00129724	0.0487469
wt_h3k4me3.q.05_peak_2711	wt_h3k4me3.q.05_peak_2711	-0.810417	2.16556	10.3419	0.00130043	0.0487748
wt_h3k4me3.q.05_peak_20253	wt_h3k4me3.q.05_peak_20253	0.79522	2.21381	10.3268	0.0013111	0.0489263
wt_h3k4me3.q.05_peak_16664	wt_h3k4me3.q.05_peak_16664	-0.125042	7.52861	10.3267	0.00131117	0.0489263
wt_h3k4me3.q.05_peak_134	wt_h3k4me3.q.05_peak_134	-0.212934	5.91133	10.3258	0.00131184	0.0489263
wt_h3k4me3.q.05_peak_10588	wt_h3k4me3.q.05_peak_10588	0.137887	7.2212	10.3144	0.00131996	0.0491372
wt_h3k4me3.q.05_peak_15413	wt_h3k4me3.q.05_peak_15413	0.116353	7.75194	10.2982	0.00133158	0.0494772
wt_h3k4me3.q.05_peak_19484	wt_h3k4me3.q.05_peak_19484	-0.503786	3.43756	10.2901	0.00133743	0.0495422
wt_h3k4me3.q.05_peak_19675	wt_h3k4me3.q.05_peak_19675	-1.2553	1.09517	10.2865	0.00134007	0.0495422
wt_h3k4me3.q.05_peak_4034	wt_h3k4me3.q.05_peak_4034	0.112874	7.84737	10.2855	0.00134079	0.0495422
wt_h3k4me3.q.05_peak_3541	wt_h3k4me3.q.05_peak_3541	-0.183867	6.4171	10.2796	0.00134512	0.0496099
wt_h3k4me3.q.05_peak_2883	wt_h3k4me3.q.05_peak_2883	0.304933	4.85766	10.2761	0.00134761	0.0496101
wt_h3k4me3.q.05_peak_15730	wt_h3k4me3.q.05_peak_15730	0.27583	5.14703	10.2726	0.00135019	0.0496133
wt_h3k4me3.q.05_peak_13269	wt_h3k4me3.q.05_peak_13269	0.377794	4.24201	10.2567	0.00136187	0.0498072
wt_h3k4me3.q.05_peak_5167	wt_h3k4me3.q.05_peak_5167	-1.15176	1.28781	10.2528	0.00136477	0.0498072
wt_h3k4me3.q.05_peak_18067	wt_h3k4me3.q.05_peak_18067	-1.15176	1.28781	10.2528	0.00136477	0.0498072
wt_h3k4me3.q.05_peak_12624	wt_h3k4me3.q.05_peak_12624	0.228794	5.68954	10.2519	0.00136547	0.0498072
wt_h3k4me3.q.05_peak_16074	wt_h3k4me3.q.05_peak_16074	0.172991	6.51903	10.2446	0.00137086	0.0499122
wt_h3k4me3.q.05_peak_20454	wt_h3k4me3.q.05_peak_20454	-0.234461	6.03802	10.2273	0.00138379	0.0502911
wt_h3k4me3.q.05_peak_497	wt_h3k4me3.q.05_peak_497	0.96546	1.70735	10.2106	0.00139635	0.0505741
wt_h3k4me3.q.05_peak_16184	wt_h3k4me3.q.05_peak_16184	-0.133335	7.30935	10.2102	0.00139665	0.0505741
wt_h3k4me3.q.05_peak_9423	wt_h3k4me3.q.05_peak_9423	-1.1744	1.3582	10.1882	0.00141343	0.0509832
wt_h3k4me3.q.05_peak_334	wt_h3k4me3.q.05_peak_334	0.353791	4.41915	10.1876	0.00141385	0.0509832
wt_h3k4me3.q.05_peak_455	wt_h3k4me3.q.05_peak_455	0.58433	3.01573	10.1827	0.00141763	0.0509832
wt_h3k4me3.q.05_peak_6546	wt_h3k4me3.q.05_peak_6546	-0.736964	2.39215	10.1808	0.00141907	0.0509832
wt_h3k4me3.q.05_peak_19006	wt_h3k4me3.q.05_peak_19006	0.278162	5.10926	10.1787	0.00142075	0.0509832
wt_h3k4me3.q.05_peak_19668	wt_h3k4me3.q.05_peak_19668	-0.338133	4.5452	10.1685	0.0014286	0.0511726
wt_h3k4me3.q.05_peak_17510	wt_h3k4me3.q.05_peak_17510	0.465947	3.63831	10.1644	0.00143181	0.0511955
wt_h3k4me3.q.05_peak_10557	wt_h3k4me3.q.05_peak_10557	-1.01937	1.5658	10.1544	0.00143954	0.0513662
wt_h3k4me3.q.05_peak_18243	wt_h3k4me3.q.05_peak_18243	-0.280437	5.08093	10.1487	0.00144405	0.0513662
wt_h3k4me3.q.05_peak_18525	wt_h3k4me3.q.05_peak_18525	-0.951308	1.73407	10.145	0.0014469	0.0513662
wt_h3k4me3.q.05_peak_20399	wt_h3k4me3.q.05_peak_20399	-0.951307	1.73407	10.145	0.0014469	0.0513662
wt_h3k4me3.q.05_peak_12071	wt_h3k4me3.q.05_peak_12071	-0.714549	2.46573	10.1218	0.00146522	0.0519241
wt_h3k4me3.q.05_peak_1735	wt_h3k4me3.q.05_peak_1735	-0.290323	4.97571	10.1138	0.00147162	0.052012
wt_h3k4me3.q.05_peak_16738	wt_h3k4me3.q.05_peak_16738	0.73944	2.37527	10.1122	0.00147292	0.052012
wt_h3k4me3.q.05_peak_5496	wt_h3k4me3.q.05_peak_5496	-0.235638	5.58152	10.1053	0.00147847	0.0520892
wt_h3k4me3.q.05_peak_12893	wt_h3k4me3.q.05_peak_12893	0.222517	5.7497	10.1029	0.00148034	0.0520892
wt_h3k4me3.q.05_peak_5141	wt_h3k4me3.q.05_peak_5141	0.385983	4.15817	10.0933	0.0014881	0.0522383
wt_h3k4me3.q.05_peak_1153	wt_h3k4me3.q.05_peak_1153	0.245941	5.45472	10.0912	0.00148983	0.0522383
wt_h3k4me3.q.05_peak_1852	wt_h3k4me3.q.05_peak_1852	-0.279193	5.40364	10.0874	0.00149286	0.0522526
wt_h3k4me3.q.05_peak_2122	wt_h3k4me3.q.05_peak_2122	-0.140304	7.13174	10.0806	0.00149835	0.0523528
wt_h3k4me3.q.05_peak_15814	wt_h3k4me3.q.05_peak_15814	-0.135783	7.49995	10.0744	0.0015034	0.0524372
wt_h3k4me3.q.05_peak_2818	wt_h3k4me3.q.05_peak_2818	0.320375	4.68527	10.0629	0.00151289	0.0526761
wt_h3k4me3.q.05_peak_7884	wt_h3k4me3.q.05_peak_7884	0.206019	5.96869	10.0471	0.00152587	0.0530354
wt_h3k4me3.q.05_peak_9863	wt_h3k4me3.q.05_peak_9863	0.356435	4.68184	10.0352	0.00153575	0.0532857
wt_h3k4me3.q.05_peak_17881	wt_h3k4me3.q.05_peak_17881	-0.197577	6.08936	10.0271	0.0015425	0.0533767
wt_h3k4me3.q.05_peak_19154	wt_h3k4me3.q.05_peak_19154	0.492527	3.58427	10.0257	0.00154373	0.0533767
wt_h3k4me3.q.05_peak_7735	wt_h3k4me3.q.05_peak_7735	1.01223	1.5658	10.0097	0.00155719	0.0537486
wt_h3k4me3.q.05_peak_7638	wt_h3k4me3.q.05_peak_7638	-0.828431	2.06392	9.99983	0.00156554	0.053851
wt_h3k4me3.q.05_peak_19413	wt_h3k4me3.q.05_peak_19413	0.473018	3.57321	9.99981	0.00156556	0.053851
wt_h3k4me3.q.05_peak_10128	wt_h3k4me3.q.05_peak_10128	0.144643	7.02184	9.97461	0.00158714	0.0544991
wt_h3k4me3.q.05_peak_5919	wt_h3k4me3.q.05_peak_5919	0.342331	4.48158	9.96653	0.00159412	0.0545648
wt_h3k4me3.q.05_peak_11711	wt_h3k4me3.q.05_peak_11711	0.449322	4.5769	9.96605	0.00159453	0.0545648
wt_h3k4me3.q.05_peak_7826	wt_h3k4me3.q.05_peak_7826	-0.237744	5.53384	9.95774	0.00160175	0.0546817
wt_h3k4me3.q.05_peak_85	wt_h3k4me3.q.05_peak_85	0.117143	7.67711	9.95579	0.00160344	0.0546817
wt_h3k4me3.q.05_peak_8534	wt_h3k4me3.q.05_peak_8534	-1.20902	1.13581	9.9246	0.00163085	0.0554266
wt_h3k4me3.q.05_peak_10083	wt_h3k4me3.q.05_peak_10083	-1.20902	1.13581	9.92459	0.00163085	0.0554266
wt_h3k4me3.q.05_peak_17379	wt_h3k4me3.q.05_peak_17379	-1.15865	1.23267	9.92005	0.00163488	0.0554688
wt_h3k4me3.q.05_peak_20594	wt_h3k4me3.q.05_peak_20594	-0.244483	5.44567	9.91377	0.00164047	0.0555638
wt_h3k4me3.q.05_peak_3255	wt_h3k4me3.q.05_peak_3255	0.438164	4.58793	9.90253	0.00165052	0.0557377
wt_h3k4me3.q.05_peak_3696	wt_h3k4me3.q.05_peak_3696	-0.841966	2.40883	9.90177	0.0016512	0.0557377
wt_h3k4me3.q.05_peak_19540	wt_h3k4me3.q.05_peak_19540	0.34362	4.45974	9.88974	0.00166202	0.0560083
wt_h3k4me3.q.05_peak_18683	wt_h3k4me3.q.05_peak_18683	0.267356	5.40571	9.87991	0.00167093	0.0562132
wt_h3k4me3.q.05_peak_1614	wt_h3k4me3.q.05_peak_1614	-0.320814	5.46274	9.87152	0.00167857	0.0563063
wt_h3k4me3.q.05_peak_13104	wt_h3k4me3.q.05_peak_13104	-0.226708	5.66024	9.87066	0.00167935	0.0563063
wt_h3k4me3.q.05_peak_4432	wt_h3k4me3.q.05_peak_4432	-0.280342	5.04003	9.86055	0.00168861	0.0565216
wt_h3k4me3.q.05_peak_1768	wt_h3k4me3.q.05_peak_1768	0.20461	5.95882	9.84453	0.00170337	0.0569201
wt_h3k4me3.q.05_peak_2550	wt_h3k4me3.q.05_peak_2550	-0.146037	7.33848	9.83668	0.00171066	0.0570677
wt_h3k4me3.q.05_peak_11230	wt_h3k4me3.q.05_peak_11230	-0.394469	4.05864	9.83307	0.00171402	0.0570844
wt_h3k4me3.q.05_peak_14973	wt_h3k4me3.q.05_peak_14973	1.00755	2.02116	9.82285	0.00172357	0.0573065
wt_h3k4me3.q.05_peak_361	wt_h3k4me3.q.05_peak_361	0.312705	4.7191	9.81693	0.00172913	0.0573955
wt_h3k4me3.q.05_peak_4363	wt_h3k4me3.q.05_peak_4363	-0.301813	4.81764	9.79694	0.00174803	0.0579263
wt_h3k4me3.q.05_peak_1971	wt_h3k4me3.q.05_peak_1971	-0.689336	2.51278	9.77074	0.00177311	0.05866
wt_h3k4me3.q.05_peak_10601	wt_h3k4me3.q.05_peak_10601	0.325852	4.95172	9.76681	0.0017769	0.058688
wt_h3k4me3.q.05_peak_11672	wt_h3k4me3.q.05_peak_11672	-0.180431	6.31517	9.73186	0.00181102	0.0595124
wt_h3k4me3.q.05_peak_3358	wt_h3k4me3.q.05_peak_3358	-0.380433	4.58977	9.72833	0.00181449	0.0595124
wt_h3k4me3.q.05_peak_9418	wt_h3k4me3.q.05_peak_9418	-1.04904	1.44162	9.72744	0.00181537	0.0595124
wt_h3k4me3.q.05_peak_5362	wt_h3k4me3.q.05_peak_5362	-0.529956	3.21855	9.7268	0.001816	0.0595124
wt_h3k4me3.q.05_peak_15811	wt_h3k4me3.q.05_peak_15811	0.618213	2.79877	9.72318	0.00181958	0.0595124
wt_h3k4me3.q.05_peak_10585	wt_h3k4me3.q.05_peak_10585	0.517668	3.28329	9.72156	0.00182119	0.0595124
wt_h3k4me3.q.05_peak_1365	wt_h3k4me3.q.05_peak_1365	0.252758	5.32013	9.71985	0.00182288	0.0595124
wt_h3k4me3.q.05_peak_1123	wt_h3k4me3.q.05_peak_1123	-0.157248	6.72661	9.71578	0.00182693	0.0595124
wt_h3k4me3.q.05_peak_1040	wt_h3k4me3.q.05_peak_1040	-0.59699	2.8907	9.71143	0.00183126	0.0595124
wt_h3k4me3.q.05_peak_1274	wt_h3k4me3.q.05_peak_1274	0.36692	4.24665	9.71094	0.00183175	0.0595124
wt_h3k4me3.q.05_peak_15101	wt_h3k4me3.q.05_peak_15101	0.37143	4.21143	9.70747	0.00183521	0.0595277
wt_h3k4me3.q.05_peak_5626	wt_h3k4me3.q.05_peak_5626	-1.32375	1.39215	9.69341	0.0018493	0.0598026
wt_h3k4me3.q.05_peak_6656	wt_h3k4me3.q.05_peak_6656	0.193965	6.15632	9.69114	0.00185158	0.0598026
wt_h3k4me3.q.05_peak_12913	wt_h3k4me3.q.05_peak_12913	0.560586	3.2968	9.6871	0.00185566	0.0598026
wt_h3k4me3.q.05_peak_10458	wt_h3k4me3.q.05_peak_10458	0.153758	6.79044	9.68707	0.00185569	0.0598026
wt_h3k4me3.q.05_peak_18333	wt_h3k4me3.q.05_peak_18333	-0.970543	1.6241	9.68302	0.00185978	0.0598112
wt_h3k4me3.q.05_peak_13345	wt_h3k4me3.q.05_peak_13345	0.786449	2.15571	9.68087	0.00186197	0.0598112
wt_h3k4me3.q.05_peak_14174	wt_h3k4me3.q.05_peak_14174	0.282039	5.83932	9.67288	0.00187008	0.0599749
wt_h3k4me3.q.05_peak_15464	wt_h3k4me3.q.05_peak_15464	0.412329	4.20667	9.66747	0.00187559	0.0599973
wt_h3k4me3.q.05_peak_5506	wt_h3k4me3.q.05_peak_5506	-0.122449	7.48994	9.66422	0.00187892	0.0599973
wt_h3k4me3.q.05_peak_5652	wt_h3k4me3.q.05_peak_5652	0.523741	3.24201	9.65843	0.00188485	0.0599973
wt_h3k4me3.q.05_peak_6739	wt_h3k4me3.q.05_peak_6739	-1.28503	0.965884	9.65454	0.00188884	0.0599973
wt_h3k4me3.q.05_peak_18922	wt_h3k4me3.q.05_peak_18922	-1.28503	0.965884	9.65454	0.00188885	0.0599973
wt_h3k4me3.q.05_peak_14067	wt_h3k4me3.q.05_peak_14067	-1.28503	0.965884	9.65453	0.00188885	0.0599973
wt_h3k4me3.q.05_peak_12312	wt_h3k4me3.q.05_peak_12312	-1.60006	0.693805	9.63713	0.00190683	0.0604721
wt_h3k4me3.q.05_peak_11121	wt_h3k4me3.q.05_peak_11121	0.612352	2.81137	9.63121	0.00191298	0.0605707
wt_h3k4me3.q.05_peak_11318	wt_h3k4me3.q.05_peak_11318	-0.147634	6.9029	9.61604	0.00192886	0.0609764
wt_h3k4me3.q.05_peak_18560	wt_h3k4me3.q.05_peak_18560	-1.12098	1.26966	9.61021	0.00193498	0.061073
wt_h3k4me3.q.05_peak_7437	wt_h3k4me3.q.05_peak_7437	0.197324	6.02927	9.60271	0.00194291	0.0612262
wt_h3k4me3.q.05_peak_2229	wt_h3k4me3.q.05_peak_2229	-1.22	1.07441	9.59946	0.00194635	0.0612376
wt_h3k4me3.q.05_peak_4133	wt_h3k4me3.q.05_peak_4133	-0.92872	1.72077	9.59426	0.00195186	0.0613144
wt_h3k4me3.q.05_peak_7773	wt_h3k4me3.q.05_peak_7773	-0.259905	5.21737	9.57932	0.00196781	0.0615121
wt_h3k4me3.q.05_peak_13873	wt_h3k4me3.q.05_peak_13873	-0.195116	6.05864	9.57921	0.00196793	0.0615121
wt_h3k4me3.q.05_peak_15395	wt_h3k4me3.q.05_peak_15395	-0.267888	6.4243	9.57533	0.00197209	0.0615121
wt_h3k4me3.q.05_peak_6639	wt_h3k4me3.q.05_peak_6639	0.124933	7.41244	9.57527	0.00197216	0.0615121
wt_h3k4me3.q.05_peak_2345	wt_h3k4me3.q.05_peak_2345	0.289751	5.32563	9.57393	0.0019736	0.0615121
wt_h3k4me3.q.05_peak_10719	wt_h3k4me3.q.05_peak_10719	-0.586644	2.91425	9.54523	0.0020047	0.0622697
wt_h3k4me3.q.05_peak_18503	wt_h3k4me3.q.05_peak_18503	0.963399	1.62409	9.53829	0.00201229	0.0622697
wt_h3k4me3.q.05_peak_1298	wt_h3k4me3.q.05_peak_1298	-0.27917	5.00343	9.53553	0.00201532	0.0622697
wt_h3k4me3.q.05_peak_9227	wt_h3k4me3.q.05_peak_9227	-0.266003	5.14331	9.53528	0.00201559	0.0622697
wt_h3k4me3.q.05_peak_16951	wt_h3k4me3.q.05_peak_16951	0.774321	2.17534	9.53334	0.00201773	0.0622697
wt_h3k4me3.q.05_peak_17940	wt_h3k4me3.q.05_peak_17940	0.760164	2.74724	9.53151	0.00201973	0.0622697
wt_h3k4me3.q.05_peak_6688	wt_h3k4me3.q.05_peak_6688	-0.25952	5.79561	9.53064	0.0020207	0.0622697
wt_h3k4me3.q.05_peak_8908	wt_h3k4me3.q.05_peak_8908	1.07525	1.3582	9.52862	0.00202292	0.0622697
wt_h3k4me3.q.05_peak_18536	wt_h3k4me3.q.05_peak_18536	0.119959	7.53169	9.52571	0.00202613	0.0622722
wt_h3k4me3.q.05_peak_17753	wt_h3k4me3.q.05_peak_17753	-0.173484	6.39947	9.51759	0.00203511	0.062452
wt_h3k4me3.q.05_peak_5635	wt_h3k4me3.q.05_peak_5635	0.180863	6.27251	9.50169	0.00205283	0.062767
wt_h3k4me3.q.05_peak_12885	wt_h3k4me3.q.05_peak_12885	-0.834453	1.97711	9.5	0.00205472	0.062767
wt_h3k4me3.q.05_peak_10362	wt_h3k4me3.q.05_peak_10362	0.142248	6.99827	9.4999	0.00205483	0.062767
wt_h3k4me3.q.05_peak_10500	wt_h3k4me3.q.05_peak_10500	0.756173	2.24201	9.48021	0.002077	0.0633278
wt_h3k4me3.q.05_peak_20143	wt_h3k4me3.q.05_peak_20143	-1.39098	0.773239	9.47663	0.00208106	0.0633278
wt_h3k4me3.q.05_peak_6793	wt_h3k4me3.q.05_peak_6793	0.333268	4.48552	9.47515	0.00208273	0.0633278
wt_h3k4me3.q.05_peak_17120	wt_h3k4me3.q.05_peak_17120	-0.165901	6.52574	9.4684	0.00209041	0.0634644
wt_h3k4me3.q.05_peak_3433	wt_h3k4me3.q.05_peak_3433	-0.127401	7.33276	9.46309	0.00209648	0.0634678
wt_h3k4me3.q.05_peak_14649	wt_h3k4me3.q.05_peak_14649	0.737815	2.78606	9.46272	0.0020969	0.0634678
wt_h3k4me3.q.05_peak_8001	wt_h3k4me3.q.05_peak_8001	-0.439123	4.7124	9.4553	0.0021054	0.0636283
wt_h3k4me3.q.05_peak_16163	wt_h3k4me3.q.05_peak_16163	-0.495479	3.36249	9.44092	0.00212198	0.0639729
wt_h3k4me3.q.05_peak_2045	wt_h3k4me3.q.05_peak_2045	0.780021	2.46573	9.43984	0.00212322	0.0639729
wt_h3k4me3.q.05_peak_969	wt_h3k4me3.q.05_peak_969	0.958003	2.61693	9.42858	0.00213629	0.0642696
wt_h3k4me3.q.05_peak_11514	wt_h3k4me3.q.05_peak_11514	-0.201389	5.94102	9.42577	0.00213957	0.064271
wt_h3k4me3.q.05_peak_12611	wt_h3k4me3.q.05_peak_12611	0.323981	4.55834	9.42242	0.00214348	0.0642915
wt_h3k4me3.q.05_peak_12799	wt_h3k4me3.q.05_peak_12799	0.180372	6.26738	9.41806	0.00214859	0.0643477
wt_h3k4me3.q.05_peak_10231	wt_h3k4me3.q.05_peak_10231	-0.234098	5.49629	9.41173	0.00215602	0.0643807
wt_h3k4me3.q.05_peak_6156	wt_h3k4me3.q.05_peak_6156	0.471238	3.50891	9.41161	0.00215615	0.0643807
wt_h3k4me3.q.05_peak_18899	wt_h3k4me3.q.05_peak_18899	1.0419	1.44162	9.39927	0.00217072	0.0646607
wt_h3k4me3.q.05_peak_2884	wt_h3k4me3.q.05_peak_2884	0.195728	6.02116	9.39703	0.00217337	0.0646607
wt_h3k4me3.q.05_peak_5322	wt_h3k4me3.q.05_peak_5322	0.216357	5.72494	9.39338	0.0021777	0.0646607
wt_h3k4me3.q.05_peak_9244	wt_h3k4me3.q.05_peak_9244	-0.26818	5.59706	9.3927	0.00217852	0.0646607
wt_h3k4me3.q.05_peak_1540	wt_h3k4me3.q.05_peak_1540	-1.05087	1.39215	9.38706	0.00218523	0.0647418
wt_h3k4me3.q.05_peak_5902	wt_h3k4me3.q.05_peak_5902	-0.86165	2.34959	9.38447	0.00218832	0.0647418
wt_h3k4me3.q.05_peak_4052	wt_h3k4me3.q.05_peak_4052	-0.158355	6.65239	9.38222	0.002191	0.0647418
wt_h3k4me3.q.05_peak_7874	wt_h3k4me3.q.05_peak_7874	0.248276	5.32013	9.37947	0.00219429	0.0647429
wt_h3k4me3.q.05_peak_16810	wt_h3k4me3.q.05_peak_16810	0.170903	6.42172	9.37491	0.00219976	0.0648083
wt_h3k4me3.q.05_peak_2235	wt_h3k4me3.q.05_peak_2235	-0.138734	7.05236	9.36116	0.00221631	0.0651995
wt_h3k4me3.q.05_peak_7096	wt_h3k4me3.q.05_peak_7096	0.156909	6.8675	9.35424	0.0022247	0.0653299
wt_h3k4me3.q.05_peak_19167	wt_h3k4me3.q.05_peak_19167	-0.874973	1.83625	9.3521	0.0022273	0.0653299
wt_h3k4me3.q.05_peak_45	wt_h3k4me3.q.05_peak_45	-0.956963	1.88475	9.34541	0.00223545	0.0654651
wt_h3k4me3.q.05_peak_8548	wt_h3k4me3.q.05_peak_8548	-0.969404	1.58059	9.34185	0.00223979	0.0654651
wt_h3k4me3.q.05_peak_9114	wt_h3k4me3.q.05_peak_9114	0.803205	2.05335	9.33967	0.00224245	0.0654651
wt_h3k4me3.q.05_peak_6853	wt_h3k4me3.q.05_peak_6853	-0.845608	1.92008	9.33486	0.00224835	0.0654651
wt_h3k4me3.q.05_peak_19510	wt_h3k4me3.q.05_peak_19510	-0.845608	1.92008	9.33486	0.00224835	0.0654651
wt_h3k4me3.q.05_peak_17064	wt_h3k4me3.q.05_peak_17064	-0.559026	3.24666	9.32785	0.00225697	0.0656201
wt_h3k4me3.q.05_peak_8797	wt_h3k4me3.q.05_peak_8797	-0.463773	3.52813	9.32034	0.00226624	0.0657935
wt_h3k4me3.q.05_peak_15611	wt_h3k4me3.q.05_peak_15611	0.180416	6.24897	9.30718	0.00228258	0.0661716
wt_h3k4me3.q.05_peak_4490	wt_h3k4me3.q.05_peak_4490	-0.17055	6.41555	9.29945	0.00229223	0.0663262
wt_h3k4me3.q.05_peak_11322	wt_h3k4me3.q.05_peak_11322	-0.747293	2.23267	9.29607	0.00229646	0.0663262
wt_h3k4me3.q.05_peak_10947	wt_h3k4me3.q.05_peak_10947	0.182289	6.21618	9.29492	0.0022979	0.0663262
wt_h3k4me3.q.05_peak_9919	wt_h3k4me3.q.05_peak_9919	0.238206	5.8675	9.28314	0.00231272	0.0664319
wt_h3k4me3.q.05_peak_18042	wt_h3k4me3.q.05_peak_18042	0.153268	6.7353	9.28271	0.00231327	0.0664319
wt_h3k4me3.q.05_peak_15733	wt_h3k4me3.q.05_peak_15733	1.01281	1.52047	9.28242	0.00231364	0.0664319
wt_h3k4me3.q.05_peak_1329	wt_h3k4me3.q.05_peak_1329	0.175805	6.32123	9.27622	0.00232148	0.0664319
wt_h3k4me3.q.05_peak_7490	wt_h3k4me3.q.05_peak_7490	0.532293	3.14081	9.27509	0.00232292	0.0664319
wt_h3k4me3.q.05_peak_18325	wt_h3k4me3.q.05_peak_18325	0.170053	6.42018	9.27143	0.00232756	0.0664319
wt_h3k4me3.q.05_peak_9468	wt_h3k4me3.q.05_peak_9468	0.289712	4.85614	9.27128	0.00232774	0.0664319
wt_h3k4me3.q.05_peak_12964	wt_h3k4me3.q.05_peak_12964	-0.448413	3.87877	9.27088	0.00232825	0.0664319
wt_h3k4me3.q.05_peak_3887	wt_h3k4me3.q.05_peak_3887	0.174654	6.33929	9.2662	0.00233421	0.0665067
wt_h3k4me3.q.05_peak_14223	wt_h3k4me3.q.05_peak_14223	0.180513	6.23909	9.2562	0.00234699	0.0667505
wt_h3k4me3.q.05_peak_2591	wt_h3k4me3.q.05_peak_2591	-0.282519	5.11055	9.2518	0.00235264	0.0667505
wt_h3k4me3.q.05_peak_5031	wt_h3k4me3.q.05_peak_5031	0.110382	7.74969	9.25166	0.00235282	0.0667505
wt_h3k4me3.q.05_peak_14854	wt_h3k4me3.q.05_peak_14854	0.318012	4.58427	9.24541	0.00236087	0.0668834
wt_h3k4me3.q.05_peak_3198	wt_h3k4me3.q.05_peak_3198	-1.34077	1.07441	9.24139	0.00236605	0.0669186
wt_h3k4me3.q.05_peak_18568	wt_h3k4me3.q.05_peak_18568	-0.399883	4.4171	9.23924	0.00236883	0.0669186
wt_h3k4me3.q.05_peak_20309	wt_h3k4me3.q.05_peak_20309	-0.210663	5.77806	9.23606	0.00237296	0.0669402
wt_h3k4me3.q.05_peak_19789	wt_h3k4me3.q.05_peak_19789	-0.146746	6.85919	9.23301	0.00237691	0.0669469
wt_h3k4me3.q.05_peak_12823	wt_h3k4me3.q.05_peak_12823	0.382506	4.05599	9.22954	0.00238141	0.0669469
wt_h3k4me3.q.05_peak_5787	wt_h3k4me3.q.05_peak_5787	-0.24439	5.81842	9.22811	0.00238328	0.0669469
wt_h3k4me3.q.05_peak_13455	wt_h3k4me3.q.05_peak_13455	-1.59813	0.896621	9.22112	0.00239239	0.0671083
wt_h3k4me3.q.05_peak_17690	wt_h3k4me3.q.05_peak_17690	-0.204095	5.86826	9.21616	0.00239888	0.0671955
wt_h3k4me3.q.05_peak_14190	wt_h3k4me3.q.05_peak_14190	0.361583	4.21143	9.20358	0.00241543	0.0675641
wt_h3k4me3.q.05_peak_2036	wt_h3k4me3.q.05_peak_2036	-1.22	1.07441	9.20098	0.00241886	0.0675652
wt_h3k4me3.q.05_peak_770	wt_h3k4me3.q.05_peak_770	-1.42054	0.693804	9.19234	0.0024303	0.0677896
wt_h3k4me3.q.05_peak_10990	wt_h3k4me3.q.05_peak_10990	-0.164626	6.50262	9.18129	0.00244502	0.0680334
wt_h3k4me3.q.05_peak_10478	wt_h3k4me3.q.05_peak_10478	-0.151106	6.76152	9.18065	0.00244587	0.0680334
wt_h3k4me3.q.05_peak_7376	wt_h3k4me3.q.05_peak_7376	0.166379	6.832	9.17677	0.00245106	0.0680829
wt_h3k4me3.q.05_peak_9306	wt_h3k4me3.q.05_peak_9306	0.724394	2.2968	9.17052	0.00245945	0.0682207
wt_h3k4me3.q.05_peak_6139	wt_h3k4me3.q.05_peak_6139	-0.830109	1.94316	9.16766	0.00246329	0.0682321
wt_h3k4me3.q.05_peak_16382	wt_h3k4me3.q.05_peak_16382	0.166394	6.46771	9.16263	0.00247007	0.0683248
wt_h3k4me3.q.05_peak_2637	wt_h3k4me3.q.05_peak_2637	0.177489	6.27194	9.14752	0.00249055	0.0687155
wt_h3k4me3.q.05_peak_10296	wt_h3k4me3.q.05_peak_10296	-0.714417	3.03197	9.14713	0.00249109	0.0687155
wt_h3k4me3.q.05_peak_5729	wt_h3k4me3.q.05_peak_5729	0.234382	5.4507	9.14291	0.00249683	0.0687786
wt_h3k4me3.q.05_peak_1588	wt_h3k4me3.q.05_peak_1588	0.477815	3.41709	9.1316	0.00251232	0.0691095
wt_h3k4me3.q.05_peak_11107	wt_h3k4me3.q.05_peak_11107	0.178001	6.25878	9.11971	0.0025287	0.069459
wt_h3k4me3.q.05_peak_9175	wt_h3k4me3.q.05_peak_9175	0.555642	2.99931	9.11703	0.00253241	0.069459
wt_h3k4me3.q.05_peak_20498	wt_h3k4me3.q.05_peak_20498	0.700753	2.37527	9.11153	0.00254003	0.069459
wt_h3k4me3.q.05_peak_16385	wt_h3k4me3.q.05_peak_16385	0.258803	5.15694	9.11023	0.00254184	0.069459
wt_h3k4me3.q.05_peak_9208	wt_h3k4me3.q.05_peak_9208	0.263738	5.45773	9.10978	0.00254246	0.069459
wt_h3k4me3.q.05_peak_7641	wt_h3k4me3.q.05_peak_7641	0.437018	4.17533	9.10596	0.00254778	0.069509
wt_h3k4me3.q.05_peak_3416	wt_h3k4me3.q.05_peak_3416	0.185108	6.13831	9.09614	0.0025615	0.0697877
wt_h3k4me3.q.05_peak_18707	wt_h3k4me3.q.05_peak_18707	0.234866	5.43552	9.08593	0.00257584	0.0700826
wt_h3k4me3.q.05_peak_49	wt_h3k4me3.q.05_peak_49	-0.489258	3.95741	9.08064	0.0025833	0.0701778
wt_h3k4me3.q.05_peak_14118	wt_h3k4me3.q.05_peak_14118	0.155172	6.66371	9.07545	0.00259064	0.0701778
wt_h3k4me3.q.05_peak_16450	wt_h3k4me3.q.05_peak_16450	0.564604	2.94888	9.07253	0.00259477	0.0701778
wt_h3k4me3.q.05_peak_10019	wt_h3k4me3.q.05_peak_10019	-0.130496	7.52096	9.07202	0.00259551	0.0701778
wt_h3k4me3.q.05_peak_1426	wt_h3k4me3.q.05_peak_1426	-0.119627	7.46374	9.07099	0.00259696	0.0701778
wt_h3k4me3.q.05_peak_4979	wt_h3k4me3.q.05_peak_4979	0.155794	6.65019	9.06771	0.00260162	0.0702086
wt_h3k4me3.q.05_peak_12753	wt_h3k4me3.q.05_peak_12753	0.714396	2.31461	9.04498	0.00263418	0.0706467
wt_h3k4me3.q.05_peak_12055	wt_h3k4me3.q.05_peak_12055	0.617501	3.18988	9.04253	0.0026377	0.0706467
wt_h3k4me3.q.05_peak_18357	wt_h3k4me3.q.05_peak_18357	0.551107	3.01028	9.04253	0.0026377	0.0706467
wt_h3k4me3.q.05_peak_14425	wt_h3k4me3.q.05_peak_14425	-0.365964	5.31903	9.04203	0.00263843	0.0706467
wt_h3k4me3.q.05_peak_2602	wt_h3k4me3.q.05_peak_2602	-1.06689	2.05335	9.04097	0.00263996	0.0706467
wt_h3k4me3.q.05_peak_15374	wt_h3k4me3.q.05_peak_15374	0.434076	4.50115	9.04009	0.00264123	0.0706467
wt_h3k4me3.q.05_peak_4833	wt_h3k4me3.q.05_peak_4833	-0.652868	2.55085	9.03752	0.00264494	0.0706467
wt_h3k4me3.q.05_peak_12153	wt_h3k4me3.q.05_peak_12153	-1.28978	1.11563	9.03663	0.00264623	0.0706467
wt_h3k4me3.q.05_peak_3371	wt_h3k4me3.q.05_peak_3371	0.268705	5.03466	9.0264	0.00266108	0.0709479
wt_h3k4me3.q.05_peak_5753	wt_h3k4me3.q.05_peak_5753	0.538757	3.06917	9.02241	0.00266689	0.0709801
wt_h3k4me3.q.05_peak_4331	wt_h3k4me3.q.05_peak_4331	0.528719	3.55084	9.02068	0.00266941	0.0709801
wt_h3k4me3.q.05_peak_19634	wt_h3k4me3.q.05_peak_19634	0.354298	4.23968	9.01536	0.0026772	0.0710921
wt_h3k4me3.q.05_peak_1364	wt_h3k4me3.q.05_peak_1364	0.123271	7.70524	9.00733	0.002689	0.0713103
wt_h3k4me3.q.05_peak_2253	wt_h3k4me3.q.05_peak_2253	0.584729	2.8424	8.99883	0.00270152	0.0715471
wt_h3k4me3.q.05_peak_13396	wt_h3k4me3.q.05_peak_13396	0.240169	5.76273	8.98513	0.00272185	0.0719898
wt_h3k4me3.q.05_peak_14841	wt_h3k4me3.q.05_peak_14841	0.23184	5.45372	8.96485	0.00275223	0.0726969
wt_h3k4me3.q.05_peak_1240	wt_h3k4me3.q.05_peak_1240	0.652766	2.66632	8.95769	0.00276304	0.0728663
wt_h3k4me3.q.05_peak_10727	wt_h3k4me3.q.05_peak_10727	-0.308168	4.62766	8.95365	0.00276916	0.0728663
wt_h3k4me3.q.05_peak_12778	wt_h3k4me3.q.05_peak_12778	0.620915	3.06391	8.95334	0.00276962	0.0728663
wt_h3k4me3.q.05_peak_5152	wt_h3k4me3.q.05_peak_5152	0.190242	6.0313	8.93984	0.00279017	0.0733093
wt_h3k4me3.q.05_peak_19427	wt_h3k4me3.q.05_peak_19427	0.745963	2.18505	8.93455	0.00279827	0.0733093
wt_h3k4me3.q.05_peak_17700	wt_h3k4me3.q.05_peak_17700	0.636821	2.60251	8.93362	0.00279969	0.0733093
wt_h3k4me3.q.05_peak_14160	wt_h3k4me3.q.05_peak_14160	-0.133193	7.10544	8.93219	0.00280189	0.0733093
wt_h3k4me3.q.05_peak_8633	wt_h3k4me3.q.05_peak_8633	0.151385	6.71407	8.93025	0.00280486	0.0733093
wt_h3k4me3.q.05_peak_19162	wt_h3k4me3.q.05_peak_19162	0.2447	5.28894	8.9195	0.00282141	0.0735515
wt_h3k4me3.q.05_peak_18513	wt_h3k4me3.q.05_peak_18513	0.436128	3.63831	8.91944	0.00282152	0.0735515
wt_h3k4me3.q.05_peak_9223	wt_h3k4me3.q.05_peak_9223	-0.12039	7.41659	8.91529	0.00282793	0.0735705
wt_h3k4me3.q.05_peak_16001	wt_h3k4me3.q.05_peak_16001	0.466508	3.4497	8.91419	0.00282963	0.0735705
wt_h3k4me3.q.05_peak_8466	wt_h3k4me3.q.05_peak_8466	-0.993274	1.45774	8.88878	0.00286928	0.0743395
wt_h3k4me3.q.05_peak_19139	wt_h3k4me3.q.05_peak_19139	-0.20791	5.7972	8.88675	0.00287248	0.0743395
wt_h3k4me3.q.05_peak_14158	wt_h3k4me3.q.05_peak_14158	-0.209016	5.74396	8.88463	0.00287582	0.0743395
wt_h3k4me3.q.05_peak_16586	wt_h3k4me3.q.05_peak_16586	0.449046	3.55084	8.88208	0.00287984	0.0743395
wt_h3k4me3.q.05_peak_9278	wt_h3k4me3.q.05_peak_9278	0.235421	5.69124	8.88139	0.00288092	0.0743395
wt_h3k4me3.q.05_peak_7714	wt_h3k4me3.q.05_peak_7714	0.119127	7.44364	8.88096	0.00288161	0.0743395
wt_h3k4me3.q.05_peak_11810	wt_h3k4me3.q.05_peak_11810	-0.193061	6.81998	8.8708	0.00289769	0.0746577
wt_h3k4me3.q.05_peak_7917	wt_h3k4me3.q.05_peak_7917	-0.222391	5.55834	8.86305	0.00291002	0.074689
wt_h3k4me3.q.05_peak_19734	wt_h3k4me3.q.05_peak_19734	-0.886129	1.73407	8.86296	0.00291015	0.074689
wt_h3k4me3.q.05_peak_9043	wt_h3k4me3.q.05_peak_9043	-0.886129	1.73407	8.86296	0.00291015	0.074689
wt_h3k4me3.q.05_peak_8956	wt_h3k4me3.q.05_peak_8956	-0.128183	7.21115	8.85994	0.00291497	0.0747162
wt_h3k4me3.q.05_peak_15226	wt_h3k4me3.q.05_peak_15226	-0.800803	1.98825	8.85096	0.00292935	0.0749177
wt_h3k4me3.q.05_peak_1125	wt_h3k4me3.q.05_peak_1125	0.161889	6.49775	8.84854	0.00293323	0.0749177
wt_h3k4me3.q.05_peak_5837	wt_h3k4me3.q.05_peak_5837	0.18029	6.17533	8.84684	0.00293597	0.0749177
wt_h3k4me3.q.05_peak_20452	wt_h3k4me3.q.05_peak_20452	-0.246814	5.25129	8.8453	0.00293845	0.0749177
wt_h3k4me3.q.05_peak_17544	wt_h3k4me3.q.05_peak_17544	-0.148503	6.85691	8.84112	0.00294518	0.0749177
wt_h3k4me3.q.05_peak_13906	wt_h3k4me3.q.05_peak_13906	-0.253789	5.16923	8.83883	0.00294888	0.0749177
wt_h3k4me3.q.05_peak_18345	wt_h3k4me3.q.05_peak_18345	-1.06659	1.63831	8.83558	0.00295414	0.0749177
wt_h3k4me3.q.05_peak_20614	wt_h3k4me3.q.05_peak_20614	-0.398322	3.87877	8.83535	0.00295451	0.0749177
wt_h3k4me3.q.05_peak_16842	wt_h3k4me3.q.05_peak_16842	0.178956	6.1953	8.83401	0.00295668	0.0749177
wt_h3k4me3.q.05_peak_6330	wt_h3k4me3.q.05_peak_6330	0.177806	6.55693	8.81863	0.00298171	0.0754557
wt_h3k4me3.q.05_peak_7972	wt_h3k4me3.q.05_peak_7972	0.133812	7.07015	8.80963	0.00299644	0.0757324
wt_h3k4me3.q.05_peak_17910	wt_h3k4me3.q.05_peak_17910	-0.129063	7.18021	8.80312	0.00300716	0.0759069
wt_h3k4me3.q.05_peak_10887	wt_h3k4me3.q.05_peak_10887	0.217008	5.61872	8.79269	0.0030244	0.0761085
wt_h3k4me3.q.05_peak_12267	wt_h3k4me3.q.05_peak_12267	-0.416226	3.90252	8.79097	0.00302726	0.0761085
wt_h3k4me3.q.05_peak_13340	wt_h3k4me3.q.05_peak_13340	-0.149339	6.73034	8.7866	0.00303452	0.0761085
wt_h3k4me3.q.05_peak_7164	wt_h3k4me3.q.05_peak_7164	0.818655	2.27877	8.78505	0.0030371	0.0761085
wt_h3k4me3.q.05_peak_5169	wt_h3k4me3.q.05_peak_5169	-0.170248	6.33548	8.78419	0.00303853	0.0761085
wt_h3k4me3.q.05_peak_9618	wt_h3k4me3.q.05_peak_9618	0.130762	7.13643	8.7825	0.00304134	0.0761085
wt_h3k4me3.q.05_peak_18482	wt_h3k4me3.q.05_peak_18482	0.215115	5.64272	8.78217	0.00304189	0.0761085
wt_h3k4me3.q.05_peak_6381	wt_h3k4me3.q.05_peak_6381	0.230543	5.56858	8.77585	0.00305245	0.0762767
wt_h3k4me3.q.05_peak_8082	wt_h3k4me3.q.05_peak_8082	-0.184265	6.34635	8.75395	0.00308933	0.0770146
wt_h3k4me3.q.05_peak_7021	wt_h3k4me3.q.05_peak_7021	0.75225	2.13581	8.75372	0.00308971	0.0770146
wt_h3k4me3.q.05_peak_16421	wt_h3k4me3.q.05_peak_16421	-0.164425	6.43298	8.74541	0.00310383	0.0771419
wt_h3k4me3.q.05_peak_13939	wt_h3k4me3.q.05_peak_13939	0.16909	6.34904	8.74265	0.00310852	0.0771419
wt_h3k4me3.q.05_peak_15214	wt_h3k4me3.q.05_peak_15214	0.155156	6.60748	8.74237	0.00310901	0.0771419
wt_h3k4me3.q.05_peak_14567	wt_h3k4me3.q.05_peak_14567	-0.664665	2.45774	8.7416	0.00311031	0.0771419
wt_h3k4me3.q.05_peak_8760	wt_h3k4me3.q.05_peak_8760	0.361581	4.21143	8.73573	0.00312035	0.0772946
wt_h3k4me3.q.05_peak_7761	wt_h3k4me3.q.05_peak_7761	-0.163239	6.45272	8.73334	0.00312444	0.0772998
wt_h3k4me3.q.05_peak_2457	wt_h3k4me3.q.05_peak_2457	-0.720513	2.24201	8.72168	0.00314449	0.0776293
wt_h3k4me3.q.05_peak_55	wt_h3k4me3.q.05_peak_55	0.183456	6.10223	8.72106	0.00314555	0.0776293
wt_h3k4me3.q.05_peak_13654	wt_h3k4me3.q.05_peak_13654	-0.902645	1.66632	8.7157	0.0031548	0.0777612
wt_h3k4me3.q.05_peak_19348	wt_h3k4me3.q.05_peak_19348	0.119338	7.53336	8.7102	0.00316434	0.0778998
wt_h3k4me3.q.05_peak_17552	wt_h3k4me3.q.05_peak_17552	0.201082	5.82774	8.70295	0.00317696	0.0780669
wt_h3k4me3.q.05_peak_3752	wt_h3k4me3.q.05_peak_3752	-0.177463	6.19711	8.69965	0.00318271	0.0780669
wt_h3k4me3.q.05_peak_862	wt_h3k4me3.q.05_peak_862	-0.111235	7.62655	8.69901	0.00318383	0.0780669
wt_h3k4me3.q.05_peak_18378	wt_h3k4me3.q.05_peak_18378	-0.177882	6.60704	8.69731	0.0031868	0.0780669
wt_h3k4me3.q.05_peak_13816	wt_h3k4me3.q.05_peak_13816	0.228745	5.44768	8.69206	0.003196	0.078196
wt_h3k4me3.q.05_peak_11412	wt_h3k4me3.q.05_peak_11412	-0.25194	5.16556	8.68897	0.00320141	0.0782053
wt_h3k4me3.q.05_peak_14733	wt_h3k4me3.q.05_peak_14733	-0.805695	2.02117	8.68737	0.00320423	0.0782053
wt_h3k4me3.q.05_peak_12692	wt_h3k4me3.q.05_peak_12692	0.18044	6.14517	8.68365	0.00321077	0.0782276
wt_h3k4me3.q.05_peak_7519	wt_h3k4me3.q.05_peak_7519	0.713583	3.06391	8.68238	0.003213	0.0782276
wt_h3k4me3.q.05_peak_3765	wt_h3k4me3.q.05_peak_3765	-0.244269	5.25244	8.67148	0.00323228	0.0785139
wt_h3k4me3.q.05_peak_4214	wt_h3k4me3.q.05_peak_4214	-0.951301	1.73407	8.67124	0.00323272	0.0785139
wt_h3k4me3.q.05_peak_19165	wt_h3k4me3.q.05_peak_19165	0.206191	5.74806	8.66905	0.00323659	0.0785139
wt_h3k4me3.q.05_peak_1316	wt_h3k4me3.q.05_peak_1316	-0.107598	7.72307	8.64815	0.00327394	0.0793232
wt_h3k4me3.q.05_peak_666	wt_h3k4me3.q.05_peak_666	0.647528	2.51278	8.64324	0.00328278	0.0793303
wt_h3k4me3.q.05_peak_17226	wt_h3k4me3.q.05_peak_17226	-1.09362	1.1947	8.64299	0.00328322	0.0793303
wt_h3k4me3.q.05_peak_6294	wt_h3k4me3.q.05_peak_6294	0.468832	3.39215	8.64135	0.00328618	0.0793303
wt_h3k4me3.q.05_peak_11871	wt_h3k4me3.q.05_peak_11871	-0.656653	2.47368	8.63784	0.00329252	0.0793873
wt_h3k4me3.q.05_peak_18403	wt_h3k4me3.q.05_peak_18403	0.176161	6.20786	8.63324	0.00330083	0.079445
wt_h3k4me3.q.05_peak_1626	wt_h3k4me3.q.05_peak_1626	-0.220307	5.54709	8.63211	0.0033029	0.079445
wt_h3k4me3.q.05_peak_12730	wt_h3k4me3.q.05_peak_12730	-0.252668	5.14704	8.62873	0.00330903	0.0794965
wt_h3k4me3.q.05_peak_20507	wt_h3k4me3.q.05_peak_20507	-0.262957	5.03063	8.62431	0.00331706	0.0795935
wt_h3k4me3.q.05_peak_473	wt_h3k4me3.q.05_peak_473	0.19106	5.96376	8.61553	0.00333309	0.0798358
wt_h3k4me3.q.05_peak_18249	wt_h3k4me3.q.05_peak_18249	0.25925	5.07048	8.61439	0.00333518	0.0798358
wt_h3k4me3.q.05_peak_10963	wt_h3k4me3.q.05_peak_10963	-0.147415	7.01165	8.60931	0.0033445	0.0798917
wt_h3k4me3.q.05_peak_16236	wt_h3k4me3.q.05_peak_16236	-0.686195	2.64536	8.60831	0.00334633	0.0798917
wt_h3k4me3.q.05_peak_11257	wt_h3k4me3.q.05_peak_11257	-0.114659	7.51423	8.60656	0.00334954	0.0798917
wt_h3k4me3.q.05_peak_823	wt_h3k4me3.q.05_peak_823	-0.753907	2.10544	8.60124	0.00335933	0.0799667
wt_h3k4me3.q.05_peak_7146	wt_h3k4me3.q.05_peak_7146	-0.853036	2.39215	8.60049	0.00336072	0.0799667
wt_h3k4me3.q.05_peak_15351	wt_h3k4me3.q.05_peak_15351	-0.486211	3.2833	8.59687	0.00336741	0.0800258
wt_h3k4me3.q.05_peak_15128	wt_h3k4me3.q.05_peak_15128	0.234014	5.36462	8.59385	0.003373	0.0800258
wt_h3k4me3.q.05_peak_9141	wt_h3k4me3.q.05_peak_9141	0.48382	3.2968	8.59137	0.00337761	0.0800258
wt_h3k4me3.q.05_peak_17882	wt_h3k4me3.q.05_peak_17882	-0.210335	5.67583	8.59046	0.00337928	0.0800258
wt_h3k4me3.q.05_peak_6653	wt_h3k4me3.q.05_peak_6653	-0.60437	2.68698	8.58321	0.00339277	0.0801289
wt_h3k4me3.q.05_peak_18021	wt_h3k4me3.q.05_peak_18021	-0.201945	5.79402	8.58141	0.00339612	0.0801289
wt_h3k4me3.q.05_peak_8658	wt_h3k4me3.q.05_peak_8658	-0.499567	3.42532	8.57751	0.00340341	0.0801289
wt_h3k4me3.q.05_peak_3449	wt_h3k4me3.q.05_peak_3449	0.280845	5.26852	8.57592	0.00340638	0.0801289
wt_h3k4me3.q.05_peak_7694	wt_h3k4me3.q.05_peak_7694	0.118678	7.40051	8.57536	0.00340743	0.0801289
wt_h3k4me3.q.05_peak_10973	wt_h3k4me3.q.05_peak_10973	-0.921109	1.59524	8.57495	0.00340819	0.0801289
wt_h3k4me3.q.05_peak_17551	wt_h3k4me3.q.05_peak_17551	-0.33004	4.3689	8.57255	0.00341269	0.0801289
wt_h3k4me3.q.05_peak_7314	wt_h3k4me3.q.05_peak_7314	0.201526	6.04736	8.57088	0.00341582	0.0801289
wt_h3k4me3.q.05_peak_43	wt_h3k4me3.q.05_peak_43	0.140947	6.86788	8.56648	0.00342408	0.0802283
wt_h3k4me3.q.05_peak_13272	wt_h3k4me3.q.05_peak_13272	0.120573	7.64711	8.56321	0.00343024	0.0802781
wt_h3k4me3.q.05_peak_14891	wt_h3k4me3.q.05_peak_14891	0.713342	2.24201	8.54714	0.00346066	0.0807203
wt_h3k4me3.q.05_peak_17351	wt_h3k4me3.q.05_peak_17351	-0.667002	2.4171	8.54268	0.00346914	0.0807203
wt_h3k4me3.q.05_peak_3065	wt_h3k4me3.q.05_peak_3065	0.639954	2.52812	8.54255	0.00346939	0.0807203
wt_h3k4me3.q.05_peak_19996	wt_h3k4me3.q.05_peak_19996	-0.624471	2.60974	8.54191	0.00347061	0.0807203
wt_h3k4me3.q.05_peak_11389	wt_h3k4me3.q.05_peak_11389	0.16809	6.52764	8.54069	0.00347295	0.0807203
wt_h3k4me3.q.05_peak_18293	wt_h3k4me3.q.05_peak_18293	0.177605	6.16739	8.54042	0.00347345	0.0807203
wt_h3k4me3.q.05_peak_7173	wt_h3k4me3.q.05_peak_7173	0.463122	3.40883	8.53546	0.00348294	0.0808463
wt_h3k4me3.q.05_peak_13308	wt_h3k4me3.q.05_peak_13308	0.397829	3.83316	8.53151	0.0034905	0.0809155
wt_h3k4me3.q.05_peak_14030	wt_h3k4me3.q.05_peak_14030	0.959737	1.48944	8.52967	0.00349404	0.0809155
wt_h3k4me3.q.05_peak_17752	wt_h3k4me3.q.05_peak_17752	-0.2291	5.41297	8.51679	0.00351885	0.0813954
wt_h3k4me3.q.05_peak_4937	wt_h3k4me3.q.05_peak_4937	-0.163386	6.4052	8.47664	0.00359735	0.0829353
wt_h3k4me3.q.05_peak_3699	wt_h3k4me3.q.05_peak_3699	0.314704	5.1433	8.47464	0.00360132	0.0829353
wt_h3k4me3.q.05_peak_2084	wt_h3k4me3.q.05_peak_2084	0.171012	6.26852	8.47437	0.00360185	0.0829353
wt_h3k4me3.q.05_peak_329	wt_h3k4me3.q.05_peak_329	-1.3821	0.943164	8.4731	0.00360437	0.0829353
wt_h3k4me3.q.05_peak_17741	wt_h3k4me3.q.05_peak_17741	0.351545	4.1729	8.47215	0.00360624	0.0829353
wt_h3k4me3.q.05_peak_15866	wt_h3k4me3.q.05_peak_15866	-0.143197	6.80036	8.45924	0.00363193	0.0834297
wt_h3k4me3.q.05_peak_11071	wt_h3k4me3.q.05_peak_11071	-0.280993	4.80981	8.45221	0.00364599	0.0835402
wt_h3k4me3.q.05_peak_9836	wt_h3k4me3.q.05_peak_9836	0.617291	2.60974	8.45071	0.00364901	0.0835402
wt_h3k4me3.q.05_peak_14900	wt_h3k4me3.q.05_peak_14900	-1.02272	1.32344	8.44854	0.00365337	0.0835402
wt_h3k4me3.q.05_peak_10697	wt_h3k4me3.q.05_peak_10697	-0.190041	5.95031	8.44846	0.00365352	0.0835402
wt_h3k4me3.q.05_peak_12820	wt_h3k4me3.q.05_peak_12820	-0.181816	6.07963	8.4383	0.00367399	0.0838463
wt_h3k4me3.q.05_peak_2945	wt_h3k4me3.q.05_peak_2945	-0.641208	2.50504	8.43764	0.00367533	0.0838463
wt_h3k4me3.q.05_peak_18382	wt_h3k4me3.q.05_peak_18382	0.17018	6.27535	8.42996	0.00369088	0.0841049
wt_h3k4me3.q.05_peak_20646	wt_h3k4me3.q.05_peak_20646	0.175309	6.18565	8.42359	0.00370384	0.0843037
wt_h3k4me3.q.05_peak_15498	wt_h3k4me3.q.05_peak_15498	0.214681	5.5861	8.41662	0.00371807	0.0845309
wt_h3k4me3.q.05_peak_5016	wt_h3k4me3.q.05_peak_5016	-0.319591	4.43349	8.41136	0.00372884	0.0846791
wt_h3k4me3.q.05_peak_6186	wt_h3k4me3.q.05_peak_6186	0.766388	2.03197	8.39618	0.0037601	0.0851949
wt_h3k4me3.q.05_peak_15142	wt_h3k4me3.q.05_peak_15142	0.766388	2.03197	8.39618	0.00376011	0.0851949
wt_h3k4me3.q.05_peak_8458	wt_h3k4me3.q.05_peak_8458	0.680169	2.34092	8.38342	0.00378659	0.0855059
wt_h3k4me3.q.05_peak_12264	wt_h3k4me3.q.05_peak_12264	0.249986	5.13581	8.37986	0.00379401	0.0855059
wt_h3k4me3.q.05_peak_909	wt_h3k4me3.q.05_peak_909	-0.208579	5.66372	8.37891	0.00379601	0.0855059
wt_h3k4me3.q.05_peak_9640	wt_h3k4me3.q.05_peak_9640	-0.148876	6.66763	8.37793	0.00379804	0.0855059
wt_h3k4me3.q.05_peak_3802	wt_h3k4me3.q.05_peak_3802	-1.43487	0.798774	8.37745	0.00379905	0.0855059
wt_h3k4me3.q.05_peak_16430	wt_h3k4me3.q.05_peak_16430	-0.899307	1.6241	8.37719	0.00379959	0.0855059
wt_h3k4me3.q.05_peak_11314	wt_h3k4me3.q.05_peak_11314	-0.781535	1.97711	8.37448	0.00380527	0.0855245
wt_h3k4me3.q.05_peak_3600	wt_h3k4me3.q.05_peak_3600	0.642293	2.62409	8.36979	0.0038151	0.0855245
wt_h3k4me3.q.05_peak_19948	wt_h3k4me3.q.05_peak_19948	0.173169	6.21262	8.36971	0.00381526	0.0855245
wt_h3k4me3.q.05_peak_12546	wt_h3k4me3.q.05_peak_12546	-1.05738	1.23267	8.36634	0.00382235	0.0855245
wt_h3k4me3.q.05_peak_13367	wt_h3k4me3.q.05_peak_13367	-1.05738	1.23267	8.36634	0.00382236	0.0855245
wt_h3k4me3.q.05_peak_636	wt_h3k4me3.q.05_peak_636	-0.941891	1.52047	8.36452	0.00382618	0.0855245
wt_h3k4me3.q.05_peak_2202	wt_h3k4me3.q.05_peak_2202	0.154971	6.54189	8.35032	0.0038562	0.0860865
wt_h3k4me3.q.05_peak_18720	wt_h3k4me3.q.05_peak_18720	-0.195785	5.9179	8.34854	0.00385997	0.0860865
wt_h3k4me3.q.05_peak_12112	wt_h3k4me3.q.05_peak_12112	-0.128779	7.10448	8.3455	0.00386644	0.0861342
wt_h3k4me3.q.05_peak_7186	wt_h3k4me3.q.05_peak_7186	0.104524	7.87652	8.33629	0.0038861	0.0864232
wt_h3k4me3.q.05_peak_950	wt_h3k4me3.q.05_peak_950	-0.832144	1.81137	8.33536	0.00388809	0.0864232
wt_h3k4me3.q.05_peak_7723	wt_h3k4me3.q.05_peak_7723	0.452108	3.44162	8.33104	0.00389732	0.0865319
wt_h3k4me3.q.05_peak_16452	wt_h3k4me3.q.05_peak_16452	0.164118	6.36355	8.3173	0.00392693	0.0870548
wt_h3k4me3.q.05_peak_17979	wt_h3k4me3.q.05_peak_17979	-0.182347	6.34418	8.31606	0.00392962	0.0870548
wt_h3k4me3.q.05_peak_1927	wt_h3k4me3.q.05_peak_1927	-0.221557	5.47467	8.30965	0.00394351	0.0872654
wt_h3k4me3.q.05_peak_14168	wt_h3k4me3.q.05_peak_14168	-0.134407	6.96554	8.3063	0.00395079	0.0873295
wt_h3k4me3.q.05_peak_3657	wt_h3k4me3.q.05_peak_3657	0.734842	2.12575	8.30342	0.00395705	0.0873709
wt_h3k4me3.q.05_peak_4466	wt_h3k4me3.q.05_peak_4466	-0.11791	7.3689	8.29597	0.00397331	0.0874646
wt_h3k4me3.q.05_peak_6846	wt_h3k4me3.q.05_peak_6846	-0.149926	6.63122	8.29476	0.00397597	0.0874646
wt_h3k4me3.q.05_peak_16347	wt_h3k4me3.q.05_peak_16347	0.591061	2.70059	8.29308	0.00397965	0.0874646
wt_h3k4me3.q.05_peak_20657	wt_h3k4me3.q.05_peak_20657	0.353898	4.12323	8.29195	0.00398211	0.0874646
wt_h3k4me3.q.05_peak_14601	wt_h3k4me3.q.05_peak_14601	0.221727	5.87502	8.29143	0.00398325	0.0874646
wt_h3k4me3.q.05_peak_12726	wt_h3k4me3.q.05_peak_12726	0.262341	4.9799	8.28707	0.00399284	0.0874807
wt_h3k4me3.q.05_peak_4456	wt_h3k4me3.q.05_peak_4456	-0.136083	6.92372	8.28377	0.00400011	0.0874807
wt_h3k4me3.q.05_peak_5876	wt_h3k4me3.q.05_peak_5876	0.233805	5.35282	8.28314	0.00400148	0.0874807
wt_h3k4me3.q.05_peak_6271	wt_h3k4me3.q.05_peak_6271	0.394244	4.23501	8.28234	0.00400325	0.0874807
wt_h3k4me3.q.05_peak_4436	wt_h3k4me3.q.05_peak_4436	-1.19907	1.1947	8.28059	0.0040071	0.0874807
wt_h3k4me3.q.05_peak_13687	wt_h3k4me3.q.05_peak_13687	0.15288	6.5695	8.27742	0.00401412	0.0874807
wt_h3k4me3.q.05_peak_3169	wt_h3k4me3.q.05_peak_3169	-0.18901	5.93599	8.27714	0.00401473	0.0874807
wt_h3k4me3.q.05_peak_20011	wt_h3k4me3.q.05_peak_20011	-0.297477	4.66111	8.27064	0.00402913	0.0876986
wt_h3k4me3.q.05_peak_9324	wt_h3k4me3.q.05_peak_9324	-0.212741	5.58519	8.26231	0.00404766	0.087941
wt_h3k4me3.q.05_peak_9198	wt_h3k4me3.q.05_peak_9198	-0.117906	7.36223	8.26069	0.00405128	0.087941
wt_h3k4me3.q.05_peak_7741	wt_h3k4me3.q.05_peak_7741	0.630286	2.77324	8.25968	0.00405352	0.087941
wt_h3k4me3.q.05_peak_18327	wt_h3k4me3.q.05_peak_18327	-0.681273	2.31461	8.25444	0.00406525	0.0880645
wt_h3k4me3.q.05_peak_17945	wt_h3k4me3.q.05_peak_17945	-0.340212	4.22798	8.25319	0.00406805	0.0880645
wt_h3k4me3.q.05_peak_11641	wt_h3k4me3.q.05_peak_11641	-0.139037	6.85197	8.25063	0.00407379	0.088093
wt_h3k4me3.q.05_peak_17437	wt_h3k4me3.q.05_peak_17437	0.260738	5.03331	8.24629	0.00408353	0.0881393
wt_h3k4me3.q.05_peak_7787	wt_h3k4me3.q.05_peak_7787	-1.42057	0.693804	8.24574	0.00408479	0.0881393
wt_h3k4me3.q.05_peak_14433	wt_h3k4me3.q.05_peak_14433	0.416953	3.65238	8.24195	0.0040933	0.0881677
wt_h3k4me3.q.05_peak_910	wt_h3k4me3.q.05_peak_910	0.707471	2.21381	8.23695	0.0041046	0.0881677
wt_h3k4me3.q.05_peak_7189	wt_h3k4me3.q.05_peak_7189	-0.150595	6.60704	8.23626	0.00410615	0.0881677
wt_h3k4me3.q.05_peak_19478	wt_h3k4me3.q.05_peak_19478	-0.234247	5.29904	8.23553	0.00410783	0.0881677
wt_h3k4me3.q.05_peak_9522	wt_h3k4me3.q.05_peak_9522	-0.918216	1.55085	8.23534	0.00410824	0.0881677
wt_h3k4me3.q.05_peak_13501	wt_h3k4me3.q.05_peak_13501	0.401187	4.02928	8.23242	0.00411485	0.0882039
wt_h3k4me3.q.05_peak_8514	wt_h3k4me3.q.05_peak_8514	0.386403	4.40882	8.23069	0.00411878	0.0882039
wt_h3k4me3.q.05_peak_5349	wt_h3k4me3.q.05_peak_5349	0.377993	3.92588	8.22845	0.00412388	0.0882182
wt_h3k4me3.q.05_peak_13377	wt_h3k4me3.q.05_peak_13377	0.128264	7.09452	8.22539	0.00413084	0.0882724
wt_h3k4me3.q.05_peak_13348	wt_h3k4me3.q.05_peak_13348	-0.165504	6.31903	8.21184	0.0041618	0.0885556
wt_h3k4me3.q.05_peak_13628	wt_h3k4me3.q.05_peak_13628	0.212281	6.30015	8.21093	0.00416389	0.0885556
wt_h3k4me3.q.05_peak_9730	wt_h3k4me3.q.05_peak_9730	-0.130398	7.04103	8.21054	0.00416477	0.0885556
wt_h3k4me3.q.05_peak_15048	wt_h3k4me3.q.05_peak_15048	0.58506	2.71407	8.20894	0.00416845	0.0885556
wt_h3k4me3.q.05_peak_3569	wt_h3k4me3.q.05_peak_3569	0.184864	5.98894	8.20475	0.00417809	0.0885556
wt_h3k4me3.q.05_peak_7317	wt_h3k4me3.q.05_peak_7317	-0.20944	5.62052	8.20342	0.00418115	0.0885556
wt_h3k4me3.q.05_peak_4081	wt_h3k4me3.q.05_peak_4081	0.322837	4.36889	8.20171	0.0041851	0.0885556
wt_h3k4me3.q.05_peak_13949	wt_h3k4me3.q.05_peak_13949	-0.114291	7.44845	8.20155	0.00418547	0.0885556
wt_h3k4me3.q.05_peak_13341	wt_h3k4me3.q.05_peak_13341	-0.14263	6.76477	8.19883	0.00419173	0.0885556
wt_h3k4me3.q.05_peak_7436	wt_h3k4me3.q.05_peak_7436	0.179799	6.06982	8.19692	0.00419615	0.0885556
wt_h3k4me3.q.05_peak_17826	wt_h3k4me3.q.05_peak_17826	0.164405	6.38847	8.19518	0.00420019	0.0885556
wt_h3k4me3.q.05_peak_14238	wt_h3k4me3.q.05_peak_14238	-0.680076	3.36249	8.1847	0.00422452	0.0885556
wt_h3k4me3.q.05_peak_14001	wt_h3k4me3.q.05_peak_14001	0.159811	6.41915	8.18461	0.00422472	0.0885556
wt_h3k4me3.q.05_peak_8052	wt_h3k4me3.q.05_peak_8052	0.204108	5.69295	8.18342	0.0042275	0.0885556
wt_h3k4me3.q.05_peak_15709	wt_h3k4me3.q.05_peak_15709	-0.122457	7.22975	8.18318	0.00422805	0.0885556
wt_h3k4me3.q.05_peak_19931	wt_h3k4me3.q.05_peak_19931	0.198021	5.78206	8.18316	0.00422811	0.0885556
wt_h3k4me3.q.05_peak_15206	wt_h3k4me3.q.05_peak_15206	-0.140108	6.81608	8.18296	0.00422858	0.0885556
wt_h3k4me3.q.05_peak_6428	wt_h3k4me3.q.05_peak_6428	-0.116325	7.38901	8.18032	0.00423472	0.0885556
wt_h3k4me3.q.05_peak_3324	wt_h3k4me3.q.05_peak_3324	-0.147047	6.66849	8.1782	0.00423969	0.0885556
wt_h3k4me3.q.05_peak_8341	wt_h3k4me3.q.05_peak_8341	-0.269528	5.21737	8.17608	0.00424464	0.0885556
wt_h3k4me3.q.05_peak_12168	wt_h3k4me3.q.05_peak_12168	-0.160645	6.40156	8.17526	0.00424655	0.0885556
wt_h3k4me3.q.05_peak_5552	wt_h3k4me3.q.05_peak_5552	0.723323	2.14579	8.17435	0.00424869	0.0885556
wt_h3k4me3.q.05_peak_15056	wt_h3k4me3.q.05_peak_15056	0.406655	3.71072	8.17375	0.00425009	0.0885556
wt_h3k4me3.q.05_peak_16287	wt_h3k4me3.q.05_peak_16287	-0.815625	1.83625	8.17344	0.00425081	0.0885556
wt_h3k4me3.q.05_peak_13362	wt_h3k4me3.q.05_peak_13362	0.364072	4.02116	8.16651	0.0042671	0.0886708
wt_h3k4me3.q.05_peak_12809	wt_h3k4me3.q.05_peak_12809	-0.405832	3.71408	8.16411	0.00427275	0.0886708
wt_h3k4me3.q.05_peak_3417	wt_h3k4me3.q.05_peak_3417	-0.217692	5.50019	8.16357	0.00427401	0.0886708
wt_h3k4me3.q.05_peak_102	wt_h3k4me3.q.05_peak_102	-0.12843	7.07865	8.16351	0.00427415	0.0886708
wt_h3k4me3.q.05_peak_1991	wt_h3k4me3.q.05_peak_1991	0.135408	6.91643	8.16148	0.00427894	0.0886778
wt_h3k4me3.q.05_peak_16104	wt_h3k4me3.q.05_peak_16104	-0.398527	3.76355	8.15519	0.0042938	0.0888164
wt_h3k4me3.q.05_peak_10922	wt_h3k4me3.q.05_peak_10922	-0.87855	1.65238	8.15394	0.00429676	0.0888164
wt_h3k4me3.q.05_peak_16678	wt_h3k4me3.q.05_peak_16678	0.338437	4.22562	8.15129	0.00430306	0.0888164
wt_h3k4me3.q.05_peak_4268	wt_h3k4me3.q.05_peak_4268	0.193392	5.94673	8.15012	0.00430583	0.0888164
wt_h3k4me3.q.05_peak_9945	wt_h3k4me3.q.05_peak_9945	0.16382	6.3382	8.1477	0.00431157	0.0888164
wt_h3k4me3.q.05_peak_7489	wt_h3k4me3.q.05_peak_7489	0.516696	3.49726	8.14673	0.00431389	0.0888164
wt_h3k4me3.q.05_peak_9257	wt_h3k4me3.q.05_peak_9257	-0.672136	2.33221	8.14549	0.00431685	0.0888164
wt_h3k4me3.q.05_peak_11118	wt_h3k4me3.q.05_peak_11118	-0.217109	5.50408	8.14167	0.00432594	0.0889118
wt_h3k4me3.q.05_peak_3423	wt_h3k4me3.q.05_peak_3423	-0.741383	2.81763	8.13751	0.00433589	0.0890242
wt_h3k4me3.q.05_peak_18500	wt_h3k4me3.q.05_peak_18500	-1.1467	1.03197	8.12448	0.00436716	0.089574
wt_h3k4me3.q.05_peak_1591	wt_h3k4me3.q.05_peak_1591	-0.35491	4.08483	8.12115	0.00437518	0.0895927
wt_h3k4me3.q.05_peak_2882	wt_h3k4me3.q.05_peak_2882	0.697109	2.23267	8.11715	0.00438485	0.0895927
wt_h3k4me3.q.05_peak_11022	wt_h3k4me3.q.05_peak_11022	0.410663	3.67324	8.11637	0.00438674	0.0895927
wt_h3k4me3.q.05_peak_1367	wt_h3k4me3.q.05_peak_1367	0.494614	3.15571	8.11305	0.00439478	0.0895927
wt_h3k4me3.q.05_peak_3009	wt_h3k4me3.q.05_peak_3009	-0.178591	6.07376	8.11004	0.00440208	0.0895927
wt_h3k4me3.q.05_peak_16840	wt_h3k4me3.q.05_peak_16840	-1.02357	1.26966	8.10732	0.00440868	0.0895927
wt_h3k4me3.q.05_peak_7360	wt_h3k4me3.q.05_peak_7360	0.146604	6.72743	8.10558	0.00441293	0.0895927
wt_h3k4me3.q.05_peak_11805	wt_h3k4me3.q.05_peak_11805	0.911076	1.55085	8.10557	0.00441295	0.0895927
wt_h3k4me3.q.05_peak_8871	wt_h3k4me3.q.05_peak_8871	0.911076	1.55085	8.10557	0.00441295	0.0895927
wt_h3k4me3.q.05_peak_18450	wt_h3k4me3.q.05_peak_18450	-0.153543	6.52431	8.10402	0.00441671	0.0895927
wt_h3k4me3.q.05_peak_17461	wt_h3k4me3.q.05_peak_17461	0.163933	6.32782	8.10368	0.00441755	0.0895927
wt_h3k4me3.q.05_peak_10427	wt_h3k4me3.q.05_peak_10427	-0.135703	6.89589	8.08965	0.00445188	0.090197
wt_h3k4me3.q.05_peak_9848	wt_h3k4me3.q.05_peak_9848	0.562674	2.79877	8.08606	0.00446071	0.0902841
wt_h3k4me3.q.05_peak_6394	wt_h3k4me3.q.05_peak_6394	-0.312697	4.58977	8.0832	0.00446776	0.0903233
wt_h3k4me3.q.05_peak_6937	wt_h3k4me3.q.05_peak_6937	0.16065	6.38426	8.08084	0.00447357	0.0903233
wt_h3k4me3.q.05_peak_14150	wt_h3k4me3.q.05_peak_14150	-0.180475	6.03668	8.07813	0.00448027	0.0903233
wt_h3k4me3.q.05_peak_7185	wt_h3k4me3.q.05_peak_7185	-0.161807	6.36196	8.07792	0.00448079	0.0903233
wt_h3k4me3.q.05_peak_5967	wt_h3k4me3.q.05_peak_5967	0.159612	6.40259	8.07425	0.00448988	0.0903776
wt_h3k4me3.q.05_peak_11717	wt_h3k4me3.q.05_peak_11717	-0.187213	5.92734	8.07317	0.00449256	0.0903776
wt_h3k4me3.q.05_peak_19679	wt_h3k4me3.q.05_peak_19679	0.164304	6.31516	8.07084	0.00449831	0.090402
wt_h3k4me3.q.05_peak_14797	wt_h3k4me3.q.05_peak_14797	-0.20589	5.64537	8.06367	0.00451617	0.0905872
wt_h3k4me3.q.05_peak_17539	wt_h3k4me3.q.05_peak_17539	-0.120215	7.26424	8.06348	0.00451663	0.0905872
wt_h3k4me3.q.05_peak_3137	wt_h3k4me3.q.05_peak_3137	-0.327189	4.30351	8.05061	0.00454885	0.0911203
wt_h3k4me3.q.05_peak_1022	wt_h3k4me3.q.05_peak_1022	-0.135741	6.88736	8.04921	0.00455235	0.0911203
wt_h3k4me3.q.05_peak_13379	wt_h3k4me3.q.05_peak_13379	0.500509	3.11054	8.04036	0.00457464	0.0914745
wt_h3k4me3.q.05_peak_6835	wt_h3k4me3.q.05_peak_6835	-0.144582	6.69338	8.03688	0.00458343	0.0914746
wt_h3k4me3.q.05_peak_17077	wt_h3k4me3.q.05_peak_17077	-0.644416	2.42532	8.03609	0.00458543	0.0914746
wt_h3k4me3.q.05_peak_17066	wt_h3k4me3.q.05_peak_17066	0.51081	3.05334	8.0331	0.00459302	0.0914746
wt_h3k4me3.q.05_peak_15955	wt_h3k4me3.q.05_peak_15955	-0.186288	5.93455	8.03284	0.00459367	0.0914746
wt_h3k4me3.q.05_peak_6392	wt_h3k4me3.q.05_peak_6392	0.251873	5.05202	8.03028	0.00460018	0.0914746
wt_h3k4me3.q.05_peak_6135	wt_h3k4me3.q.05_peak_6135	0.123879	7.32206	8.02948	0.00460221	0.0914746
wt_h3k4me3.q.05_peak_9537	wt_h3k4me3.q.05_peak_9537	-1.05997	1.17534	8.02628	0.00461034	0.0915449
wt_h3k4me3.q.05_peak_4898	wt_h3k4me3.q.05_peak_4898	-0.405615	3.6904	8.02029	0.00462562	0.0917568
wt_h3k4me3.q.05_peak_15642	wt_h3k4me3.q.05_peak_15642	0.150628	6.5644	8.00873	0.00465524	0.0922525
wt_h3k4me3.q.05_peak_13353	wt_h3k4me3.q.05_peak_13353	0.220256	5.43654	7.99964	0.00467867	0.0925549
wt_h3k4me3.q.05_peak_3989	wt_h3k4me3.q.05_peak_3989	-0.54921	2.84853	7.99815	0.00468252	0.0925549
wt_h3k4me3.q.05_peak_10470	wt_h3k4me3.q.05_peak_10470	0.241183	5.17167	7.99673	0.00468618	0.0925549
wt_h3k4me3.q.05_peak_19170	wt_h3k4me3.q.05_peak_19170	0.434044	3.49726	7.99561	0.00468909	0.0925549
wt_h3k4me3.q.05_peak_12650	wt_h3k4me3.q.05_peak_12650	1.01645	1.26966	7.99249	0.00469718	0.0926229
wt_h3k4me3.q.05_peak_9167	wt_h3k4me3.q.05_peak_9167	0.367205	3.96588	7.99056	0.00470218	0.0926297
wt_h3k4me3.q.05_peak_11334	wt_h3k4me3.q.05_peak_11334	-0.126898	7.08126	7.98194	0.00472463	0.0929591
wt_h3k4me3.q.05_peak_1532	wt_h3k4me3.q.05_peak_1532	0.263705	5.1971	7.97873	0.00473301	0.0929591
wt_h3k4me3.q.05_peak_1981	wt_h3k4me3.q.05_peak_1981	-0.963938	1.39215	7.97699	0.00473757	0.0929591
wt_h3k4me3.q.05_peak_6128	wt_h3k4me3.q.05_peak_6128	-0.963938	1.39215	7.97699	0.00473757	0.0929591
wt_h3k4me3.q.05_peak_7054	wt_h3k4me3.q.05_peak_7054	0.225336	5.36462	7.97024	0.00475527	0.0931355
wt_h3k4me3.q.05_peak_643	wt_h3k4me3.q.05_peak_643	0.506812	3.06391	7.96999	0.00475592	0.0931355
wt_h3k4me3.q.05_peak_17854	wt_h3k4me3.q.05_peak_17854	0.175432	6.41863	7.96727	0.00476308	0.0931841
wt_h3k4me3.q.05_peak_11434	wt_h3k4me3.q.05_peak_11434	-0.298605	4.54897	7.96259	0.00477541	0.0933266
wt_h3k4me3.q.05_peak_7827	wt_h3k4me3.q.05_peak_7827	0.394544	3.86675	7.95961	0.00478327	0.0933266
wt_h3k4me3.q.05_peak_9053	wt_h3k4me3.q.05_peak_9053	-0.481889	3.37528	7.95918	0.00478442	0.0933266
wt_h3k4me3.q.05_peak_16136	wt_h3k4me3.q.05_peak_16136	-0.110113	7.51688	7.94978	0.00480931	0.0937204
wt_h3k4me3.q.05_peak_604	wt_h3k4me3.q.05_peak_604	-1.21874	0.848527	7.94671	0.00481748	0.0937877
wt_h3k4me3.q.05_peak_4784	wt_h3k4me3.q.05_peak_4784	0.201397	5.68783	7.94014	0.00483501	0.0940371
wt_h3k4me3.q.05_peak_6759	wt_h3k4me3.q.05_peak_6759	-0.654595	2.36676	7.9361	0.00484581	0.0941554
wt_h3k4me3.q.05_peak_19335	wt_h3k4me3.q.05_peak_19335	0.170755	6.17289	7.92453	0.0048769	0.0946288
wt_h3k4me3.q.05_peak_3181	wt_h3k4me3.q.05_peak_3181	-0.209117	6.61784	7.9225	0.00488237	0.0946288
wt_h3k4me3.q.05_peak_2942	wt_h3k4me3.q.05_peak_2942	0.131699	6.95527	7.92	0.00488912	0.0946288
wt_h3k4me3.q.05_peak_19651	wt_h3k4me3.q.05_peak_19651	0.49305	3.13079	7.91998	0.00488919	0.0946288
wt_h3k4me3.q.05_peak_16240	wt_h3k4me3.q.05_peak_16240	0.120874	7.21913	7.91732	0.00489636	0.0946757
wt_h3k4me3.q.05_peak_12381	wt_h3k4me3.q.05_peak_12381	0.161251	6.34146	7.91203	0.00491072	0.0948612
wt_h3k4me3.q.05_peak_14846	wt_h3k4me3.q.05_peak_14846	-0.132112	6.94353	7.90986	0.0049166	0.0948827
wt_h3k4me3.q.05_peak_13625	wt_h3k4me3.q.05_peak_13625	0.248109	5.0731	7.90678	0.004925	0.0949528
wt_h3k4me3.q.05_peak_5243	wt_h3k4me3.q.05_peak_5243	0.393181	3.75704	7.89997	0.00494357	0.095167
wt_h3k4me3.q.05_peak_1321	wt_h3k4me3.q.05_peak_1321	0.768698	1.94316	7.8992	0.00494566	0.095167
wt_h3k4me3.q.05_peak_10997	wt_h3k4me3.q.05_peak_10997	0.121075	7.20994	7.89733	0.00495078	0.0951734
wt_h3k4me3.q.05_peak_9813	wt_h3k4me3.q.05_peak_9813	-0.119717	7.24172	7.87995	0.00499858	0.0957552
wt_h3k4me3.q.05_peak_10668	wt_h3k4me3.q.05_peak_10668	0.25766	4.95882	7.87988	0.00499877	0.0957552
wt_h3k4me3.q.05_peak_17484	wt_h3k4me3.q.05_peak_17484	0.412785	3.61693	7.87969	0.00499929	0.0957552
wt_h3k4me3.q.05_peak_1875	wt_h3k4me3.q.05_peak_1875	-0.271076	4.81138	7.87723	0.0050061	0.0957552
wt_h3k4me3.q.05_peak_14259	wt_h3k4me3.q.05_peak_14259	0.324946	4.71071	7.87663	0.00500777	0.0957552
wt_h3k4me3.q.05_peak_6261	wt_h3k4me3.q.05_peak_6261	0.136606	6.83432	7.87325	0.00501714	0.0957552
wt_h3k4me3.q.05_peak_6746	wt_h3k4me3.q.05_peak_6746	0.112967	7.71218	7.87225	0.00501993	0.0957552
wt_h3k4me3.q.05_peak_18331	wt_h3k4me3.q.05_peak_18331	-0.201026	5.68013	7.8716	0.00502172	0.0957552
wt_h3k4me3.q.05_peak_148	wt_h3k4me3.q.05_peak_148	0.191801	6.15385	7.87038	0.00502511	0.0957552
wt_h3k4me3.q.05_peak_18202	wt_h3k4me3.q.05_peak_18202	-0.11847	7.27167	7.86894	0.00502912	0.0957552
wt_h3k4me3.q.05_peak_16156	wt_h3k4me3.q.05_peak_16156	0.314173	4.40675	7.86555	0.00503854	0.095843
wt_h3k4me3.q.05_peak_207	wt_h3k4me3.q.05_peak_207	0.168396	6.20249	7.86178	0.00504906	0.0959065
wt_h3k4me3.q.05_peak_6718	wt_h3k4me3.q.05_peak_6718	-0.494673	3.17534	7.8609	0.00505151	0.0959065
wt_h3k4me3.q.05_peak_13283	wt_h3k4me3.q.05_peak_13283	-0.539447	2.87278	7.85753	0.00506096	0.0959775
wt_h3k4me3.q.05_peak_12166	wt_h3k4me3.q.05_peak_12166	-0.526757	2.93743	7.85612	0.00506489	0.0959775
wt_h3k4me3.q.05_peak_15978	wt_h3k4me3.q.05_peak_15978	0.122333	7.1677	7.84416	0.00509852	0.096523
wt_h3k4me3.q.05_peak_8841	wt_h3k4me3.q.05_peak_8841	0.176988	6.05002	7.83843	0.00511471	0.0967373
wt_h3k4me3.q.05_peak_9574	wt_h3k4me3.q.05_peak_9574	-0.102296	7.72723	7.83671	0.00511956	0.0967373
wt_h3k4me3.q.05_peak_14768	wt_h3k4me3.q.05_peak_14768	-0.202214	5.78047	7.83489	0.00512472	0.096743
wt_h3k4me3.q.05_peak_5551	wt_h3k4me3.q.05_peak_5551	0.837607	1.74724	7.8265	0.00514856	0.097057
wt_h3k4me3.q.05_peak_11733	wt_h3k4me3.q.05_peak_11733	0.145613	6.84469	7.82479	0.00515345	0.097057
wt_h3k4me3.q.05_peak_17096	wt_h3k4me3.q.05_peak_17096	0.145004	6.6436	7.82264	0.00515957	0.097057
wt_h3k4me3.q.05_peak_957	wt_h3k4me3.q.05_peak_957	-0.157793	6.389	7.8222	0.00516084	0.097057
wt_h3k4me3.q.05_peak_4252	wt_h3k4me3.q.05_peak_4252	0.365069	3.95172	7.82048	0.00516575	0.0970577
wt_h3k4me3.q.05_peak_15180	wt_h3k4me3.q.05_peak_15180	0.690865	2.20429	7.81008	0.00519555	0.0974168
wt_h3k4me3.q.05_peak_6126	wt_h3k4me3.q.05_peak_6126	0.106515	7.59364	7.80966	0.00519678	0.0974168
wt_h3k4me3.q.05_peak_12795	wt_h3k4me3.q.05_peak_12795	0.315702	4.69039	7.8087	0.00519954	0.0974168
wt_h3k4me3.q.05_peak_59	wt_h3k4me3.q.05_peak_59	-0.162578	6.29512	7.79909	0.00522724	0.0976803
wt_h3k4me3.q.05_peak_10664	wt_h3k4me3.q.05_peak_10664	0.113763	7.38373	7.79667	0.00523427	0.0976803
wt_h3k4me3.q.05_peak_10248	wt_h3k4me3.q.05_peak_10248	0.172588	6.1169	7.79648	0.00523481	0.0976803
wt_h3k4me3.q.05_peak_11139	wt_h3k4me3.q.05_peak_11139	0.116393	7.31239	7.7959	0.0052365	0.0976803
wt_h3k4me3.q.05_peak_9659	wt_h3k4me3.q.05_peak_9659	-0.159211	6.35606	7.79064	0.00525177	0.0976803
wt_h3k4me3.q.05_peak_2903	wt_h3k4me3.q.05_peak_2903	0.318771	4.7956	7.78924	0.00525584	0.0976803
wt_h3k4me3.q.05_peak_74	wt_h3k4me3.q.05_peak_74	0.130291	6.96271	7.78758	0.00526065	0.0976803
wt_h3k4me3.q.05_peak_9171	wt_h3k4me3.q.05_peak_9171	-0.0726731	8.84768	7.78694	0.00526253	0.0976803
wt_h3k4me3.q.05_peak_8952	wt_h3k4me3.q.05_peak_8952	0.793641	1.98825	7.78502	0.00526812	0.0976803
wt_h3k4me3.q.05_peak_13189	wt_h3k4me3.q.05_peak_13189	-0.299564	4.50698	7.78327	0.00527323	0.0976803
wt_h3k4me3.q.05_peak_14753	wt_h3k4me3.q.05_peak_14753	-0.179174	6.00275	7.78212	0.00527659	0.0976803
wt_h3k4me3.q.05_peak_9594	wt_h3k4me3.q.05_peak_9594	-0.205742	5.59524	7.78209	0.00527667	0.0976803
wt_h3k4me3.q.05_peak_7733	wt_h3k4me3.q.05_peak_7733	0.381045	3.82386	7.78185	0.00527736	0.0976803
wt_h3k4me3.q.05_peak_3281	wt_h3k4me3.q.05_peak_3281	-0.748652	1.98825	7.77188	0.00530657	0.0979228
wt_h3k4me3.q.05_peak_13154	wt_h3k4me3.q.05_peak_13154	0.154826	6.43603	7.76956	0.00531341	0.0979228
wt_h3k4me3.q.05_peak_14053	wt_h3k4me3.q.05_peak_14053	0.613082	2.51278	7.76805	0.00531784	0.0979228
wt_h3k4me3.q.05_peak_6173	wt_h3k4me3.q.05_peak_6173	-0.422355	3.53194	7.76757	0.00531926	0.0979228
wt_h3k4me3.q.05_peak_17175	wt_h3k4me3.q.05_peak_17175	0.64742	2.36676	7.76161	0.00533685	0.0979228
wt_h3k4me3.q.05_peak_13007	wt_h3k4me3.q.05_peak_13007	-0.937103	1.42532	7.76089	0.00533897	0.0979228
wt_h3k4me3.q.05_peak_10444	wt_h3k4me3.q.05_peak_10444	-0.937103	1.42532	7.76088	0.00533898	0.0979228
wt_h3k4me3.q.05_peak_6724	wt_h3k4me3.q.05_peak_6724	-0.937103	1.42532	7.76088	0.00533898	0.0979228
wt_h3k4me3.q.05_peak_14895	wt_h3k4me3.q.05_peak_14895	-0.937103	1.42532	7.76088	0.00533898	0.0979228
wt_h3k4me3.q.05_peak_3148	wt_h3k4me3.q.05_peak_3148	-0.155566	6.41967	7.76033	0.00534063	0.0979228
wt_h3k4me3.q.05_peak_2639	wt_h3k4me3.q.05_peak_2639	0.122613	7.1433	7.759	0.00534455	0.0979228
wt_h3k4me3.q.05_peak_12699	wt_h3k4me3.q.05_peak_12699	-0.157686	6.66676	7.75514	0.00535598	0.0980421
wt_h3k4me3.q.05_peak_87	wt_h3k4me3.q.05_peak_87	0.145945	6.70143	7.74776	0.00537792	0.0983532
wt_h3k4me3.q.05_peak_16718	wt_h3k4me3.q.05_peak_16718	-0.178169	6.01096	7.73794	0.00540725	0.0987382
wt_h3k4me3.q.05_peak_11315	wt_h3k4me3.q.05_peak_11315	-0.637966	2.40051	7.73739	0.00540889	0.0987382
wt_h3k4me3.q.05_peak_16123	wt_h3k4me3.q.05_peak_16123	-0.213821	5.47269	7.73055	0.00542943	0.0989768
wt_h3k4me3.q.05_peak_6386	wt_h3k4me3.q.05_peak_6386	-0.748133	2.07441	7.72856	0.00543541	0.0989768
wt_h3k4me3.q.05_peak_19182	wt_h3k4me3.q.05_peak_19182	-0.323065	4.28104	7.72808	0.00543687	0.0989768
wt_h3k4me3.q.05_peak_10156	wt_h3k4me3.q.05_peak_10156	0.321016	4.29904	7.7246	0.00544736	0.0990772
wt_h3k4me3.q.05_peak_15721	wt_h3k4me3.q.05_peak_15721	-0.313431	4.36463	7.71338	0.0054813	0.0996036
wt_h3k4me3.q.05_peak_18542	wt_h3k4me3.q.05_peak_18542	0.512211	2.98825	7.70741	0.00549946	0.099779
wt_h3k4me3.q.05_peak_15474	wt_h3k4me3.q.05_peak_15474	-0.12565	7.05733	7.70691	0.00550097	0.099779
wt_h3k4me3.q.05_peak_19254	wt_h3k4me3.q.05_peak_19254	0.222014	5.3582	7.70394	0.00551004	0.0998509
wt_h3k4me3.q.05_peak_456	wt_h3k4me3.q.05_peak_456	0.112527	7.39894	7.7016	0.00551718	0.0998509
wt_h3k4me3.q.05_peak_12503	wt_h3k4me3.q.05_peak_12503	-0.891924	1.53574	7.70069	0.00551998	0.0998509
wt_h3k4me3.q.05_peak_4239	wt_h3k4me3.q.05_peak_4239	0.680692	2.22327	7.69577	0.00553505	0.100033
wt_h3k4me3.q.05_peak_4306	wt_h3k4me3.q.05_peak_4306	-0.461878	3.26967	7.69328	0.00554267	0.10008
wt_h3k4me3.q.05_peak_3539	wt_h3k4me3.q.05_peak_3539	-0.56847	2.70059	7.68815	0.00555845	0.100193
wt_h3k4me3.q.05_peak_9233	wt_h3k4me3.q.05_peak_9233	-1.06282	1.11563	7.68634	0.00556403	0.100193
wt_h3k4me3.q.05_peak_471	wt_h3k4me3.q.05_peak_471	-1.06282	1.11563	7.68634	0.00556404	0.100193
wt_h3k4me3.q.05_peak_10931	wt_h3k4me3.q.05_peak_10931	0.534357	3.94602	7.68363	0.0055724	0.100253
wt_h3k4me3.q.05_peak_17465	wt_h3k4me3.q.05_peak_17465	-0.206719	5.56208	7.68073	0.00558135	0.100323
wt_h3k4me3.q.05_peak_5184	wt_h3k4me3.q.05_peak_5184	0.337109	4.71742	7.67554	0.00559744	0.100522
wt_h3k4me3.q.05_peak_7229	wt_h3k4me3.q.05_peak_7229	0.352815	4.02116	7.67303	0.00560523	0.100555
wt_h3k4me3.q.05_peak_14760	wt_h3k4me3.q.05_peak_14760	-0.316151	4.33221	7.6717	0.00560937	0.100555
wt_h3k4me3.q.05_peak_14	wt_h3k4me3.q.05_peak_14	0.492504	4.24665	7.66956	0.005616	0.100583
wt_h3k4me3.q.05_peak_16171	wt_h3k4me3.q.05_peak_16171	0.273874	4.74231	7.66262	0.00563767	0.10088
wt_h3k4me3.q.05_peak_8293	wt_h3k4me3.q.05_peak_8293	-0.165857	6.42941	7.65187	0.00567135	0.101392
wt_h3k4me3.q.05_peak_3533	wt_h3k4me3.q.05_peak_3533	0.160047	6.41709	7.64886	0.00568081	0.10145
wt_h3k4me3.q.05_peak_20403	wt_h3k4me3.q.05_peak_20403	0.164056	6.23909	7.6476	0.00568478	0.10145
wt_h3k4me3.q.05_peak_17433	wt_h3k4me3.q.05_peak_17433	-0.41554	3.5546	7.64315	0.00569882	0.101609
wt_h3k4me3.q.05_peak_14139	wt_h3k4me3.q.05_peak_14139	0.299715	5.16555	7.63876	0.00571272	0.101766
wt_h3k4me3.q.05_peak_906	wt_h3k4me3.q.05_peak_906	-0.120993	7.15942	7.63383	0.00572837	0.101789
wt_h3k4me3.q.05_peak_9549	wt_h3k4me3.q.05_peak_9549	0.276035	4.71407	7.63288	0.00573139	0.101789
wt_h3k4me3.q.05_peak_4597	wt_h3k4me3.q.05_peak_4597	0.222046	5.34417	7.63252	0.00573252	0.101789
wt_h3k4me3.q.05_peak_10676	wt_h3k4me3.q.05_peak_10676	-1.10861	1.01028	7.63032	0.00573952	0.101789
wt_h3k4me3.q.05_peak_7929	wt_h3k4me3.q.05_peak_7929	-1.10861	1.01028	7.63031	0.00573953	0.101789
wt_h3k4me3.q.05_peak_14996	wt_h3k4me3.q.05_peak_14996	0.093611	7.96834	7.62501	0.00575642	0.101997
wt_h3k4me3.q.05_peak_157	wt_h3k4me3.q.05_peak_157	0.174637	6.04736	7.61781	0.00577945	0.102221
wt_h3k4me3.q.05_peak_7854	wt_h3k4me3.q.05_peak_7854	0.406312	3.61334	7.61756	0.00578028	0.102221
wt_h3k4me3.q.05_peak_4416	wt_h3k4me3.q.05_peak_4416	0.192011	5.76678	7.61625	0.00578448	0.102221
wt_h3k4me3.q.05_peak_10476	wt_h3k4me3.q.05_peak_10476	-0.562784	2.71408	7.61218	0.00579755	0.102303
wt_h3k4me3.q.05_peak_5077	wt_h3k4me3.q.05_peak_5077	0.366834	3.89957	7.61161	0.00579938	0.102303
wt_h3k4me3.q.05_peak_16565	wt_h3k4me3.q.05_peak_16565	-0.225892	5.73159	7.60157	0.00583175	0.102783
wt_h3k4me3.q.05_peak_11435	wt_h3k4me3.q.05_peak_11435	-0.137572	6.75786	7.59361	0.00585755	0.103147
wt_h3k4me3.q.05_peak_9789	wt_h3k4me3.q.05_peak_9789	-0.16485	6.38269	7.58903	0.00587246	0.103259
wt_h3k4me3.q.05_peak_18091	wt_h3k4me3.q.05_peak_18091	-0.755785	1.93167	7.58526	0.00588475	0.103259
wt_h3k4me3.q.05_peak_15882	wt_h3k4me3.q.05_peak_15882	-0.172085	6.08418	7.58425	0.00588804	0.103259
wt_h3k4me3.q.05_peak_13658	wt_h3k4me3.q.05_peak_13658	-0.269567	5.40987	7.584	0.00588885	0.103259
wt_h3k4me3.q.05_peak_8119	wt_h3k4me3.q.05_peak_8119	0.186893	5.84009	7.58355	0.00589033	0.103259
wt_h3k4me3.q.05_peak_8961	wt_h3k4me3.q.05_peak_8961	0.231236	5.21618	7.58063	0.00589987	0.103259
wt_h3k4me3.q.05_peak_5582	wt_h3k4me3.q.05_peak_5582	-0.397139	3.66979	7.58052	0.00590024	0.103259
wt_h3k4me3.q.05_peak_18721	wt_h3k4me3.q.05_peak_18721	-0.162407	6.25533	7.57817	0.00590795	0.103293
wt_h3k4me3.q.05_peak_12909	wt_h3k4me3.q.05_peak_12909	0.515147	2.94888	7.57677	0.00591252	0.103293
wt_h3k4me3.q.05_peak_18394	wt_h3k4me3.q.05_peak_18394	0.138547	6.73282	7.57467	0.00591941	0.103323
wt_h3k4me3.q.05_peak_6843	wt_h3k4me3.q.05_peak_6843	-0.701429	2.7603	7.5695	0.00593642	0.103529
wt_h3k4me3.q.05_peak_2771	wt_h3k4me3.q.05_peak_2771	-0.911775	1.45774	7.55645	0.00597958	0.10419
wt_h3k4me3.q.05_peak_4086	wt_h3k4me3.q.05_peak_4086	0.480491	3.13581	7.55425	0.00598688	0.104226
wt_h3k4me3.q.05_peak_12225	wt_h3k4me3.q.05_peak_12225	-0.121435	7.13111	7.55054	0.00599922	0.10435
wt_h3k4me3.q.05_peak_7190	wt_h3k4me3.q.05_peak_7190	0.374843	4.06391	7.53529	0.0060502	0.105145
wt_h3k4me3.q.05_peak_17554	wt_h3k4me3.q.05_peak_17554	0.140709	6.67712	7.5303	0.00606696	0.105344
wt_h3k4me3.q.05_peak_9766	wt_h3k4me3.q.05_peak_9766	0.165835	6.18323	7.52738	0.00607682	0.105378
wt_h3k4me3.q.05_peak_1664	wt_h3k4me3.q.05_peak_1664	0.142899	6.62944	7.52631	0.00608042	0.105378
wt_h3k4me3.q.05_peak_17477	wt_h3k4me3.q.05_peak_17477	-0.991419	1.25129	7.52271	0.00609258	0.105378
wt_h3k4me3.q.05_peak_15693	wt_h3k4me3.q.05_peak_15693	-0.122745	7.09195	7.52159	0.00609639	0.105378
wt_h3k4me3.q.05_peak_1368	wt_h3k4me3.q.05_peak_1368	0.95516	1.34092	7.52091	0.00609868	0.105378
wt_h3k4me3.q.05_peak_15785	wt_h3k4me3.q.05_peak_15785	0.181314	5.91716	7.52032	0.00610069	0.105378
wt_h3k4me3.q.05_peak_700	wt_h3k4me3.q.05_peak_700	-0.191967	5.74725	7.51416	0.00612158	0.105648
wt_h3k4me3.q.05_peak_2094	wt_h3k4me3.q.05_peak_2094	-0.654828	2.64536	7.51126	0.00613145	0.105652
wt_h3k4me3.q.05_peak_8873	wt_h3k4me3.q.05_peak_8873	0.386891	3.73075	7.51096	0.00613245	0.105652
wt_h3k4me3.q.05_peak_10543	wt_h3k4me3.q.05_peak_10543	-0.557954	2.7603	7.50881	0.0061398	0.105687
wt_h3k4me3.q.05_peak_6558	wt_h3k4me3.q.05_peak_6558	-0.386243	3.73407	7.50683	0.00614655	0.105712
wt_h3k4me3.q.05_peak_14775	wt_h3k4me3.q.05_peak_14775	-0.834662	1.66632	7.50294	0.00615984	0.105809
wt_h3k4me3.q.05_peak_8472	wt_h3k4me3.q.05_peak_8472	0.166411	6.168	7.50208	0.00616278	0.105809
wt_h3k4me3.q.05_peak_5923	wt_h3k4me3.q.05_peak_5923	-1.27371	1.47368	7.49869	0.00617438	0.105845
wt_h3k4me3.q.05_peak_13009	wt_h3k4me3.q.05_peak_13009	-0.19829	5.64888	7.49836	0.00617551	0.105845
wt_h3k4me3.q.05_peak_9478	wt_h3k4me3.q.05_peak_9478	0.169592	6.1099	7.49344	0.00619241	0.106043
wt_h3k4me3.q.05_peak_1416	wt_h3k4me3.q.05_peak_1416	0.129234	6.92769	7.49038	0.00620293	0.106058
wt_h3k4me3.q.05_peak_16359	wt_h3k4me3.q.05_peak_16359	-0.172529	6.05798	7.49009	0.00620393	0.106058
wt_h3k4me3.q.05_peak_20644	wt_h3k4me3.q.05_peak_20644	-0.230707	5.20429	7.48684	0.00621514	0.106158
wt_h3k4me3.q.05_peak_985	wt_h3k4me3.q.05_peak_985	0.324407	4.22327	7.48133	0.0062342	0.106357
wt_h3k4me3.q.05_peak_20281	wt_h3k4me3.q.05_peak_20281	0.606646	2.48944	7.4804	0.00623742	0.106357
wt_h3k4me3.q.05_peak_672	wt_h3k4me3.q.05_peak_672	0.124176	7.04503	7.46512	0.00629057	0.10712
wt_h3k4me3.q.05_peak_476	wt_h3k4me3.q.05_peak_476	-0.127948	7.24782	7.46443	0.00629298	0.10712
wt_h3k4me3.q.05_peak_2992	wt_h3k4me3.q.05_peak_2992	-0.169233	6.10863	7.45675	0.00631989	0.107487
wt_h3k4me3.q.05_peak_7079	wt_h3k4me3.q.05_peak_7079	0.188106	5.7956	7.45458	0.00632753	0.107525
wt_h3k4me3.q.05_peak_20574	wt_h3k4me3.q.05_peak_20574	-0.193444	5.71072	7.44327	0.00636742	0.10811
wt_h3k4me3.q.05_peak_12275	wt_h3k4me3.q.05_peak_12275	0.43743	3.78925	7.43441	0.00639884	0.108551
wt_h3k4me3.q.05_peak_9873	wt_h3k4me3.q.05_peak_9873	0.35262	3.97711	7.43139	0.00640959	0.108641
wt_h3k4me3.q.05_peak_6865	wt_h3k4me3.q.05_peak_6865	1.36804	1.09517	7.42931	0.006417	0.108674
wt_h3k4me3.q.05_peak_10599	wt_h3k4me3.q.05_peak_10599	-1.02552	1.15571	7.4249	0.00643274	0.10875
wt_h3k4me3.q.05_peak_20514	wt_h3k4me3.q.05_peak_20514	-0.33436	4.12576	7.42359	0.00643744	0.10875
wt_h3k4me3.q.05_peak_8586	wt_h3k4me3.q.05_peak_8586	-0.150855	6.44516	7.42277	0.00644037	0.10875
wt_h3k4me3.q.05_peak_9633	wt_h3k4me3.q.05_peak_9633	0.224346	5.27308	7.42086	0.00644719	0.10875
wt_h3k4me3.q.05_peak_11946	wt_h3k4me3.q.05_peak_11946	-0.934419	1.37527	7.42043	0.00644875	0.10875
wt_h3k4me3.q.05_peak_16081	wt_h3k4me3.q.05_peak_16081	0.248433	5.62588	7.41743	0.0064595	0.108839
wt_h3k4me3.q.05_peak_15536	wt_h3k4me3.q.05_peak_15536	0.0981224	7.77202	7.41553	0.00646633	0.108862
wt_h3k4me3.q.05_peak_19930	wt_h3k4me3.q.05_peak_19930	0.176197	5.9799	7.40979	0.00648701	0.1089
wt_h3k4me3.q.05_peak_17590	wt_h3k4me3.q.05_peak_17590	0.11378	7.3035	7.408	0.00649343	0.1089
wt_h3k4me3.q.05_peak_1013	wt_h3k4me3.q.05_peak_1013	-0.96943	1.58059	7.40737	0.00649572	0.1089
wt_h3k4me3.q.05_peak_18792	wt_h3k4me3.q.05_peak_18792	0.155786	6.5769	7.407	0.00649705	0.1089
wt_h3k4me3.q.05_peak_11888	wt_h3k4me3.q.05_peak_11888	0.20103	5.59068	7.40577	0.0065015	0.1089
wt_h3k4me3.q.05_peak_11663	wt_h3k4me3.q.05_peak_11663	-0.50789	2.95457	7.40263	0.00651285	0.1089
wt_h3k4me3.q.05_peak_14923	wt_h3k4me3.q.05_peak_14923	0.771355	1.84853	7.4023	0.00651405	0.1089
wt_h3k4me3.q.05_peak_13096	wt_h3k4me3.q.05_peak_13096	0.335424	4.11309	7.40185	0.00651568	0.1089
wt_h3k4me3.q.05_peak_14134	wt_h3k4me3.q.05_peak_14134	0.158064	6.30127	7.40126	0.00651781	0.1089
wt_h3k4me3.q.05_peak_10317	wt_h3k4me3.q.05_peak_10317	-0.169053	6.09903	7.39301	0.00654779	0.108933
wt_h3k4me3.q.05_peak_9724	wt_h3k4me3.q.05_peak_9724	0.211396	5.4406	7.39119	0.00655441	0.108933
wt_h3k4me3.q.05_peak_1904	wt_h3k4me3.q.05_peak_1904	-0.372718	4.28781	7.3887	0.0065635	0.108933
wt_h3k4me3.q.05_peak_13622	wt_h3k4me3.q.05_peak_13622	-0.170531	6.28499	7.38841	0.00656457	0.108933
wt_h3k4me3.q.05_peak_8329	wt_h3k4me3.q.05_peak_8329	-0.263484	4.80036	7.38743	0.00656813	0.108933
wt_h3k4me3.q.05_peak_13844	wt_h3k4me3.q.05_peak_13844	-0.794046	1.82386	7.38684	0.00657028	0.108933
wt_h3k4me3.q.05_peak_715	wt_h3k4me3.q.05_peak_715	0.161811	6.22797	7.38545	0.00657536	0.108933
wt_h3k4me3.q.05_peak_3236	wt_h3k4me3.q.05_peak_3236	0.135341	6.76557	7.38545	0.00657536	0.108933
wt_h3k4me3.q.05_peak_11769	wt_h3k4me3.q.05_peak_11769	0.141921	6.62141	7.38413	0.00658018	0.108933
wt_h3k4me3.q.05_peak_3517	wt_h3k4me3.q.05_peak_3517	0.526321	2.85463	7.38402	0.0065806	0.108933
wt_h3k4me3.q.05_peak_7213	wt_h3k4me3.q.05_peak_7213	0.39391	3.65588	7.38266	0.00658557	0.108933
wt_h3k4me3.q.05_peak_7553	wt_h3k4me3.q.05_peak_7553	0.339506	4.07441	7.37927	0.006598	0.108933
wt_h3k4me3.q.05_peak_8627	wt_h3k4me3.q.05_peak_8627	-0.166245	6.1458	7.3779	0.00660304	0.108933
wt_h3k4me3.q.05_peak_16600	wt_h3k4me3.q.05_peak_16600	-0.291619	4.50698	7.37786	0.00660315	0.108933
wt_h3k4me3.q.05_peak_4205	wt_h3k4me3.q.05_peak_4205	0.14499	6.55553	7.37706	0.0066061	0.108933
wt_h3k4me3.q.05_peak_3140	wt_h3k4me3.q.05_peak_3140	0.157561	6.30573	7.37621	0.00660923	0.108933
wt_h3k4me3.q.05_peak_1585	wt_h3k4me3.q.05_peak_1585	0.164816	6.17106	7.37472	0.00661471	0.108933
wt_h3k4me3.q.05_peak_5098	wt_h3k4me3.q.05_peak_5098	0.651915	2.27877	7.37195	0.00662492	0.108933
wt_h3k4me3.q.05_peak_10006	wt_h3k4me3.q.05_peak_10006	-0.331996	4.13581	7.37143	0.00662681	0.108933
wt_h3k4me3.q.05_peak_10976	wt_h3k4me3.q.05_peak_10976	-0.130691	6.86826	7.36986	0.0066326	0.108933
wt_h3k4me3.q.05_peak_3946	wt_h3k4me3.q.05_peak_3946	-0.0933064	7.92426	7.36931	0.00663462	0.108933
wt_h3k4me3.q.05_peak_20041	wt_h3k4me3.q.05_peak_20041	0.266432	4.76354	7.36087	0.00666585	0.109307
wt_h3k4me3.q.05_peak_8751	wt_h3k4me3.q.05_peak_8751	-0.120807	7.10768	7.36018	0.00666843	0.109307
wt_h3k4me3.q.05_peak_14120	wt_h3k4me3.q.05_peak_14120	-0.145807	6.53432	7.35715	0.00667966	0.109401
wt_h3k4me3.q.05_peak_12613	wt_h3k4me3.q.05_peak_12613	0.318992	4.24665	7.35433	0.00669015	0.109437
wt_h3k4me3.q.05_peak_5697	wt_h3k4me3.q.05_peak_5697	-0.221999	5.29007	7.35361	0.00669284	0.109437
wt_h3k4me3.q.05_peak_19471	wt_h3k4me3.q.05_peak_19471	0.430628	3.40051	7.349	0.00671001	0.109598
wt_h3k4me3.q.05_peak_11258	wt_h3k4me3.q.05_peak_11258	0.164244	6.17594	7.34728	0.00671643	0.109598
wt_h3k4me3.q.05_peak_19136	wt_h3k4me3.q.05_peak_19136	-1.06597	1.05335	7.34655	0.00671916	0.109598
wt_h3k4me3.q.05_peak_6594	wt_h3k4me3.q.05_peak_6594	0.15401	6.36729	7.34322	0.0067316	0.109711
wt_h3k4me3.q.05_peak_10108	wt_h3k4me3.q.05_peak_10108	0.139616	6.66198	7.34164	0.00673754	0.109718
wt_h3k4me3.q.05_peak_384	wt_h3k4me3.q.05_peak_384	0.384593	3.71407	7.33593	0.00675898	0.109784
wt_h3k4me3.q.05_peak_2809	wt_h3k4me3.q.05_peak_2809	0.135194	6.75867	7.3357	0.00675983	0.109784
wt_h3k4me3.q.05_peak_8726	wt_h3k4me3.q.05_peak_8726	0.200882	5.57875	7.33507	0.0067622	0.109784
wt_h3k4me3.q.05_peak_9840	wt_h3k4me3.q.05_peak_9840	-0.162038	6.93959	7.33469	0.00676363	0.109784
wt_h3k4me3.q.05_peak_2844	wt_h3k4me3.q.05_peak_2844	0.162853	6.1983	7.33304	0.00676986	0.109795
wt_h3k4me3.q.05_peak_6366	wt_h3k4me3.q.05_peak_6366	0.659653	3.03197	7.32855	0.00678677	0.10998
wt_h3k4me3.q.05_peak_11563	wt_h3k4me3.q.05_peak_11563	0.17183	6.03734	7.32533	0.00679895	0.110088
wt_h3k4me3.q.05_peak_18678	wt_h3k4me3.q.05_peak_18678	-0.190152	5.73572	7.31556	0.006836	0.110458
wt_h3k4me3.q.05_peak_14744	wt_h3k4me3.q.05_peak_14744	0.201776	5.86599	7.31488	0.00683859	0.110458
wt_h3k4me3.q.05_peak_3370	wt_h3k4me3.q.05_peak_3370	0.358399	3.9084	7.31348	0.00684391	0.110458
wt_h3k4me3.q.05_peak_3415	wt_h3k4me3.q.05_peak_3415	0.358399	3.9084	7.31346	0.00684399	0.110458
wt_h3k4me3.q.05_peak_10683	wt_h3k4me3.q.05_peak_10683	0.735047	1.95457	7.30677	0.00686953	0.11078
wt_h3k4me3.q.05_peak_15669	wt_h3k4me3.q.05_peak_15669	0.152244	6.39319	7.30086	0.00689215	0.111024
wt_h3k4me3.q.05_peak_1894	wt_h3k4me3.q.05_peak_1894	-0.137815	6.69253	7.29991	0.0068958	0.111024
wt_h3k4me3.q.05_peak_3846	wt_h3k4me3.q.05_peak_3846	0.21251	5.40571	7.29328	0.00692129	0.111344
wt_h3k4me3.q.05_peak_14612	wt_h3k4me3.q.05_peak_14612	0.356883	3.91425	7.2821	0.00696452	0.111949
wt_h3k4me3.q.05_peak_5271	wt_h3k4me3.q.05_peak_5271	0.550267	3.17533	7.28034	0.00697132	0.111968
wt_h3k4me3.q.05_peak_8271	wt_h3k4me3.q.05_peak_8271	0.088157	8.08757	7.27874	0.00697757	0.111978
wt_h3k4me3.q.05_peak_5756	wt_h3k4me3.q.05_peak_5756	-1.17486	0.823865	7.27499	0.00699213	0.112122
wt_h3k4me3.q.05_peak_9753	wt_h3k4me3.q.05_peak_9753	0.0992195	7.70418	7.26658	0.00702494	0.112532
wt_h3k4me3.q.05_peak_6191	wt_h3k4me3.q.05_peak_6191	0.368079	3.82386	7.2655	0.00702917	0.112532
wt_h3k4me3.q.05_peak_17140	wt_h3k4me3.q.05_peak_17140	-0.45892	3.61334	7.26293	0.00703923	0.112532
wt_h3k4me3.q.05_peak_1805	wt_h3k4me3.q.05_peak_1805	-0.171927	6.44769	7.26266	0.00704029	0.112532
wt_h3k4me3.q.05_peak_759	wt_h3k4me3.q.05_peak_759	-0.524163	3.1802	7.25638	0.00706497	0.112718
wt_h3k4me3.q.05_peak_6080	wt_h3k4me3.q.05_peak_6080	0.18918	5.73902	7.25575	0.00706745	0.112718
wt_h3k4me3.q.05_peak_3283	wt_h3k4me3.q.05_peak_3283	-0.615379	2.40883	7.25537	0.00706894	0.112718
wt_h3k4me3.q.05_peak_16186	wt_h3k4me3.q.05_peak_16186	0.344266	4.01028	7.25274	0.00707928	0.112793
wt_h3k4me3.q.05_peak_9713	wt_h3k4me3.q.05_peak_9713	-0.152716	6.6129	7.24844	0.00709626	0.112973
wt_h3k4me3.q.05_peak_2419	wt_h3k4me3.q.05_peak_2419	-0.159771	6.23677	7.24398	0.00711392	0.113164
wt_h3k4me3.q.05_peak_1356	wt_h3k4me3.q.05_peak_1356	0.202875	5.65326	7.21671	0.0072228	0.114716
wt_h3k4me3.q.05_peak_16361	wt_h3k4me3.q.05_peak_16361	-0.119113	7.12071	7.21666	0.007223	0.114716
wt_h3k4me3.q.05_peak_4704	wt_h3k4me3.q.05_peak_4704	0.145202	6.51663	7.2111	0.0072454	0.114909
wt_h3k4me3.q.05_peak_17765	wt_h3k4me3.q.05_peak_17765	0.231531	5.13956	7.21078	0.0072467	0.114909
wt_h3k4me3.q.05_peak_6212	wt_h3k4me3.q.05_peak_6212	0.144335	6.53431	7.20869	0.00725515	0.114951
wt_h3k4me3.q.05_peak_3831	wt_h3k4me3.q.05_peak_3831	-0.234252	5.10416	7.20517	0.0072694	0.115076
wt_h3k4me3.q.05_peak_2371	wt_h3k4me3.q.05_peak_2371	-0.184102	5.80824	7.20389	0.00727457	0.115076
wt_h3k4me3.q.05_peak_9867	wt_h3k4me3.q.05_peak_9867	0.241147	5.01981	7.20182	0.00728296	0.115117
wt_h3k4me3.q.05_peak_5277	wt_h3k4me3.q.05_peak_5277	0.677556	2.14579	7.19975	0.00729139	0.115159
wt_h3k4me3.q.05_peak_14458	wt_h3k4me3.q.05_peak_14458	-1.45719	0.988252	7.18772	0.00734043	0.115842
wt_h3k4me3.q.05_peak_5686	wt_h3k4me3.q.05_peak_5686	0.164052	6.14579	7.18362	0.0073572	0.116014
wt_h3k4me3.q.05_peak_379	wt_h3k4me3.q.05_peak_379	-0.990847	1.1947	7.18112	0.00736749	0.116033
wt_h3k4me3.q.05_peak_19491	wt_h3k4me3.q.05_peak_19491	0.272796	4.65937	7.17844	0.00737847	0.116033
wt_h3k4me3.q.05_peak_18176	wt_h3k4me3.q.05_peak_18176	0.485703	3.70735	7.17775	0.00738131	0.116033
wt_h3k4me3.q.05_peak_1343	wt_h3k4me3.q.05_peak_1343	-1.05926	1.79877	7.17766	0.00738168	0.116033
wt_h3k4me3.q.05_peak_19641	wt_h3k4me3.q.05_peak_19641	-0.167891	6.07506	7.17578	0.00738944	0.116056
wt_h3k4me3.q.05_peak_15839	wt_h3k4me3.q.05_peak_15839	-0.161717	6.18627	7.1741	0.00739634	0.116056
wt_h3k4me3.q.05_peak_2175	wt_h3k4me3.q.05_peak_2175	0.58381	3.26509	7.17208	0.00740467	0.116056
wt_h3k4me3.q.05_peak_20400	wt_h3k4me3.q.05_peak_20400	0.476734	3.08482	7.1713	0.0074079	0.116056
wt_h3k4me3.q.05_peak_5513	wt_h3k4me3.q.05_peak_5513	-0.829115	1.6241	7.17024	0.0074123	0.116056
wt_h3k4me3.q.05_peak_3814	wt_h3k4me3.q.05_peak_3814	-0.458563	3.18989	7.16452	0.00743597	0.116242
wt_h3k4me3.q.05_peak_20174	wt_h3k4me3.q.05_peak_20174	-0.168911	6.05468	7.1636	0.00743978	0.116242
wt_h3k4me3.q.05_peak_1101	wt_h3k4me3.q.05_peak_1101	0.160341	6.20965	7.16313	0.00744171	0.116242
wt_h3k4me3.q.05_peak_1899	wt_h3k4me3.q.05_peak_1899	-0.19449	5.63743	7.15832	0.00746172	0.116398
wt_h3k4me3.q.05_peak_8523	wt_h3k4me3.q.05_peak_8523	-0.143709	6.53622	7.15792	0.00746337	0.116398
wt_h3k4me3.q.05_peak_10191	wt_h3k4me3.q.05_peak_10191	-0.135559	6.83972	7.15255	0.00748576	0.116656
wt_h3k4me3.q.05_peak_12330	wt_h3k4me3.q.05_peak_12330	0.230926	5.77886	7.14197	0.00753005	0.117254
wt_h3k4me3.q.05_peak_3520	wt_h3k4me3.q.05_peak_3520	0.18152	5.88101	7.13486	0.00755996	0.117624
wt_h3k4me3.q.05_peak_16782	wt_h3k4me3.q.05_peak_16782	-0.555616	2.65937	7.13352	0.00756559	0.117624
wt_h3k4me3.q.05_peak_18320	wt_h3k4me3.q.05_peak_18320	0.22008	5.2708	7.1312	0.00757541	0.117685
wt_h3k4me3.q.05_peak_5875	wt_h3k4me3.q.05_peak_5875	-0.373172	3.75705	7.12601	0.00759738	0.11783
wt_h3k4me3.q.05_peak_559	wt_h3k4me3.q.05_peak_559	0.380363	3.70397	7.12588	0.00759793	0.11783
wt_h3k4me3.q.05_peak_386	wt_h3k4me3.q.05_peak_386	0.373653	3.75378	7.1248	0.00760251	0.11783
wt_h3k4me3.q.05_peak_11033	wt_h3k4me3.q.05_peak_11033	0.507795	2.90252	7.12331	0.00760883	0.117836
wt_h3k4me3.q.05_peak_8615	wt_h3k4me3.q.05_peak_8615	0.443491	3.27422	7.11938	0.00762549	0.118003
wt_h3k4me3.q.05_peak_873	wt_h3k4me3.q.05_peak_873	0.143427	6.53383	7.11689	0.0076361	0.118075
wt_h3k4me3.q.05_peak_2871	wt_h3k4me3.q.05_peak_2871	0.529449	3.56951	7.10971	0.00766675	0.118446
wt_h3k4me3.q.05_peak_18681	wt_h3k4me3.q.05_peak_18681	-0.147449	6.4487	7.10849	0.00767198	0.118446
wt_h3k4me3.q.05_peak_7328	wt_h3k4me3.q.05_peak_7328	-0.146151	6.77847	7.10328	0.00769432	0.118615
wt_h3k4me3.q.05_peak_4815	wt_h3k4me3.q.05_peak_4815	-0.233511	5.09259	7.10315	0.00769485	0.118615
wt_h3k4me3.q.05_peak_11269	wt_h3k4me3.q.05_peak_11269	-0.381419	3.70059	7.10131	0.00770278	0.118645
wt_h3k4me3.q.05_peak_2476	wt_h3k4me3.q.05_peak_2476	-0.181419	6.64405	7.09352	0.00773632	0.11907
wt_h3k4me3.q.05_peak_9264	wt_h3k4me3.q.05_peak_9264	-1.02664	1.09517	7.08369	0.00777885	0.119619
wt_h3k4me3.q.05_peak_10842	wt_h3k4me3.q.05_peak_10842	0.325973	4.13079	7.08042	0.00779307	0.119619
wt_h3k4me3.q.05_peak_14927	wt_h3k4me3.q.05_peak_14927	-0.908177	1.40883	7.07985	0.00779554	0.119619
wt_h3k4me3.q.05_peak_1103	wt_h3k4me3.q.05_peak_1103	-0.195912	5.59979	7.07974	0.00779602	0.119619
wt_h3k4me3.q.05_peak_18316	wt_h3k4me3.q.05_peak_18316	-0.144815	6.49532	7.07249	0.00782763	0.11994
wt_h3k4me3.q.05_peak_4089	wt_h3k4me3.q.05_peak_4089	-1.40672	0.872774	7.07218	0.00782899	0.11994
wt_h3k4me3.q.05_peak_7051	wt_h3k4me3.q.05_peak_7051	-0.115649	7.18021	7.07038	0.00783684	0.119968
wt_h3k4me3.q.05_peak_13201	wt_h3k4me3.q.05_peak_13201	-0.17054	6.00549	7.06454	0.00786243	0.120267
wt_h3k4me3.q.05_peak_19519	wt_h3k4me3.q.05_peak_19519	-0.107278	7.41194	7.05908	0.00788643	0.120365
wt_h3k4me3.q.05_peak_20667	wt_h3k4me3.q.05_peak_20667	-0.182877	5.98409	7.0584	0.00788946	0.120365
wt_h3k4me3.q.05_peak_1813	wt_h3k4me3.q.05_peak_1813	-0.60364	2.75379	7.05812	0.0078907	0.120365
wt_h3k4me3.q.05_peak_16023	wt_h3k4me3.q.05_peak_16023	0.572332	2.56579	7.0576	0.00789297	0.120365
wt_h3k4me3.q.05_peak_10670	wt_h3k4me3.q.05_peak_10670	0.709339	1.99931	7.05308	0.00791289	0.12051
wt_h3k4me3.q.05_peak_4710	wt_h3k4me3.q.05_peak_4710	-0.134059	6.72411	7.0527	0.00791459	0.12051
wt_h3k4me3.q.05_peak_18214	wt_h3k4me3.q.05_peak_18214	0.342439	4.76516	7.04941	0.00792915	0.120639
wt_h3k4me3.q.05_peak_19817	wt_h3k4me3.q.05_peak_19817	-0.128643	6.84815	7.04599	0.0079443	0.120716
wt_h3k4me3.q.05_peak_7308	wt_h3k4me3.q.05_peak_7308	0.438432	4.24897	7.04554	0.00794629	0.120716
wt_h3k4me3.q.05_peak_7722	wt_h3k4me3.q.05_peak_7722	0.270922	4.65063	7.0379	0.00798024	0.121091
wt_h3k4me3.q.05_peak_8226	wt_h3k4me3.q.05_peak_8226	-0.634159	2.28781	7.03725	0.00798317	0.121091
wt_h3k4me3.q.05_peak_14420	wt_h3k4me3.q.05_peak_14420	-0.471028	3.09001	7.03279	0.00800304	0.1213
wt_h3k4me3.q.05_peak_20069	wt_h3k4me3.q.05_peak_20069	-0.267032	4.6904	7.03132	0.00800965	0.121308
wt_h3k4me3.q.05_peak_11025	wt_h3k4me3.q.05_peak_11025	-0.887906	1.97711	7.02536	0.00803631	0.1215
wt_h3k4me3.q.05_peak_18521	wt_h3k4me3.q.05_peak_18521	-0.883416	1.44162	7.02505	0.00803771	0.1215
wt_h3k4me3.q.05_peak_16229	wt_h3k4me3.q.05_peak_16229	0.554274	2.64536	7.02327	0.0080457	0.1215
wt_h3k4me3.q.05_peak_15106	wt_h3k4me3.q.05_peak_15106	-1.08961	1.25129	7.02305	0.0080467	0.1215
wt_h3k4me3.q.05_peak_20233	wt_h3k4me3.q.05_peak_20233	0.300202	4.35174	7.01368	0.00808892	0.121935
wt_h3k4me3.q.05_peak_16557	wt_h3k4me3.q.05_peak_16557	0.506774	3.43349	7.00963	0.00810726	0.121935
wt_h3k4me3.q.05_peak_8400	wt_h3k4me3.q.05_peak_8400	-1.06948	0.988252	7.00693	0.00811947	0.121935
wt_h3k4me3.q.05_peak_18965	wt_h3k4me3.q.05_peak_18965	-1.06948	0.988252	7.00693	0.00811947	0.121935
wt_h3k4me3.q.05_peak_18430	wt_h3k4me3.q.05_peak_18430	-1.06948	0.988252	7.00693	0.00811948	0.121935
wt_h3k4me3.q.05_peak_1672	wt_h3k4me3.q.05_peak_1672	-1.06948	0.988252	7.00693	0.00811949	0.121935
wt_h3k4me3.q.05_peak_17389	wt_h3k4me3.q.05_peak_17389	0.273166	4.62052	7.00662	0.00812088	0.121935
wt_h3k4me3.q.05_peak_1830	wt_h3k4me3.q.05_peak_1830	-0.299076	4.70398	7.00582	0.00812452	0.121935
wt_h3k4me3.q.05_peak_19825	wt_h3k4me3.q.05_peak_19825	-0.235416	5.04803	7.00119	0.00814555	0.122034
wt_h3k4me3.q.05_peak_7935	wt_h3k4me3.q.05_peak_7935	-1.40677	0.872775	6.99995	0.00815121	0.122034
wt_h3k4me3.q.05_peak_2975	wt_h3k4me3.q.05_peak_2975	-0.310332	4.2536	6.99898	0.00815563	0.122034
wt_h3k4me3.q.05_peak_20497	wt_h3k4me3.q.05_peak_20497	-0.146183	6.45121	6.99897	0.00815564	0.122034
wt_h3k4me3.q.05_peak_17438	wt_h3k4me3.q.05_peak_17438	0.198642	5.54142	6.99267	0.0081844	0.122342
wt_h3k4me3.q.05_peak_6833	wt_h3k4me3.q.05_peak_6833	-0.132934	6.73655	6.99179	0.00818846	0.122342
wt_h3k4me3.q.05_peak_9721	wt_h3k4me3.q.05_peak_9721	-0.748654	1.98825	6.98909	0.00820082	0.122434
wt_h3k4me3.q.05_peak_11691	wt_h3k4me3.q.05_peak_11691	-0.296249	4.38374	6.9875	0.00820808	0.122451
wt_h3k4me3.q.05_peak_8449	wt_h3k4me3.q.05_peak_8449	0.203749	5.46473	6.98123	0.0082369	0.122789
wt_h3k4me3.q.05_peak_1338	wt_h3k4me3.q.05_peak_1338	0.157469	6.22445	6.97754	0.00825389	0.12295
wt_h3k4me3.q.05_peak_14569	wt_h3k4me3.q.05_peak_14569	-0.191305	5.92951	6.97541	0.00826374	0.123005
wt_h3k4me3.q.05_peak_2790	wt_h3k4me3.q.05_peak_2790	0.189652	5.67238	6.96967	0.00829029	0.123276
wt_h3k4me3.q.05_peak_15706	wt_h3k4me3.q.05_peak_15706	-0.489524	2.97151	6.96879	0.00829434	0.123276
wt_h3k4me3.q.05_peak_16087	wt_h3k4me3.q.05_peak_16087	0.264859	4.70059	6.96462	0.00831371	0.123472
wt_h3k4me3.q.05_peak_8399	wt_h3k4me3.q.05_peak_8399	-0.692557	2.0427	6.96105	0.00833031	0.123626
wt_h3k4me3.q.05_peak_2801	wt_h3k4me3.q.05_peak_2801	-0.242264	4.95599	6.95788	0.0083451	0.123754
wt_h3k4me3.q.05_peak_13655	wt_h3k4me3.q.05_peak_13655	0.185112	6.42377	6.95423	0.00836214	0.123891
wt_h3k4me3.q.05_peak_7047	wt_h3k4me3.q.05_peak_7047	-0.958536	1.23267	6.95322	0.00836683	0.123891
wt_h3k4me3.q.05_peak_4254	wt_h3k4me3.q.05_peak_4254	0.129928	6.79719	6.95018	0.0083811	0.12401
wt_h3k4me3.q.05_peak_19129	wt_h3k4me3.q.05_peak_19129	0.181493	5.79719	6.94784	0.00839203	0.12408
wt_h3k4me3.q.05_peak_4497	wt_h3k4me3.q.05_peak_4497	-0.14602	6.44263	6.94335	0.00841313	0.12418
wt_h3k4me3.q.05_peak_12743	wt_h3k4me3.q.05_peak_12743	-0.110403	7.61357	6.9429	0.00841527	0.12418
wt_h3k4me3.q.05_peak_2846	wt_h3k4me3.q.05_peak_2846	0.749782	1.83625	6.94243	0.00841749	0.12418
wt_h3k4me3.q.05_peak_15340	wt_h3k4me3.q.05_peak_15340	0.657492	2.45774	6.93631	0.00844633	0.124513
wt_h3k4me3.q.05_peak_15619	wt_h3k4me3.q.05_peak_15619	-0.302807	4.31018	6.93387	0.00845785	0.124591
wt_h3k4me3.q.05_peak_767	wt_h3k4me3.q.05_peak_767	0.251264	4.84546	6.93128	0.00847012	0.124679
wt_h3k4me3.q.05_peak_7809	wt_h3k4me3.q.05_peak_7809	0.506195	2.87277	6.92881	0.00848182	0.124759
wt_h3k4me3.q.05_peak_3108	wt_h3k4me3.q.05_peak_3108	-0.125073	6.9073	6.92468	0.0085014	0.124955
wt_h3k4me3.q.05_peak_18458	wt_h3k4me3.q.05_peak_18458	-0.153817	7.16495	6.91791	0.00853364	0.125336
wt_h3k4me3.q.05_peak_11523	wt_h3k4me3.q.05_peak_11523	-0.129944	6.78846	6.91404	0.00855216	0.125516
wt_h3k4me3.q.05_peak_1102	wt_h3k4me3.q.05_peak_1102	0.128574	6.82036	6.91071	0.00856809	0.125657
wt_h3k4me3.q.05_peak_19177	wt_h3k4me3.q.05_peak_19177	0.127231	6.85196	6.90794	0.00858139	0.125709
wt_h3k4me3.q.05_peak_5376	wt_h3k4me3.q.05_peak_5376	0.270313	5.08222	6.90734	0.00858424	0.125709
wt_h3k4me3.q.05_peak_11467	wt_h3k4me3.q.05_peak_11467	0.39694	3.53953	6.90319	0.0086042	0.125908
wt_h3k4me3.q.05_peak_11011	wt_h3k4me3.q.05_peak_11011	-0.224319	5.16678	6.8992	0.00862344	0.126073
wt_h3k4me3.q.05_peak_18716	wt_h3k4me3.q.05_peak_18716	-0.190911	5.63743	6.89798	0.00862932	0.126073
wt_h3k4me3.q.05_peak_8317	wt_h3k4me3.q.05_peak_8317	0.474959	4.2968	6.89692	0.00863444	0.126073
wt_h3k4me3.q.05_peak_14200	wt_h3k4me3.q.05_peak_14200	-0.166486	6.0407	6.89466	0.00864536	0.12614
wt_h3k4me3.q.05_peak_11042	wt_h3k4me3.q.05_peak_11042	0.186013	5.71239	6.88993	0.00866829	0.126313
wt_h3k4me3.q.05_peak_15993	wt_h3k4me3.q.05_peak_15993	0.609056	2.36676	6.8886	0.00867471	0.126313
wt_h3k4me3.q.05_peak_11780	wt_h3k4me3.q.05_peak_11780	0.536333	3.2605	6.88816	0.00867685	0.126313
wt_h3k4me3.q.05_peak_19282	wt_h3k4me3.q.05_peak_19282	0.312471	4.21143	6.88697	0.00868262	0.126313
wt_h3k4me3.q.05_peak_16875	wt_h3k4me3.q.05_peak_16875	0.165476	6.05665	6.88417	0.00869625	0.126419
wt_h3k4me3.q.05_peak_17383	wt_h3k4me3.q.05_peak_17383	0.490533	2.94888	6.88021	0.00871554	0.126503
wt_h3k4me3.q.05_peak_3515	wt_h3k4me3.q.05_peak_3515	-0.904283	1.3582	6.8781	0.00872583	0.126503
wt_h3k4me3.q.05_peak_801	wt_h3k4me3.q.05_peak_801	-0.904283	1.3582	6.8781	0.00872584	0.126503
wt_h3k4me3.q.05_peak_10852	wt_h3k4me3.q.05_peak_10852	-0.145652	6.43604	6.87777	0.00872743	0.126503
wt_h3k4me3.q.05_peak_12664	wt_h3k4me3.q.05_peak_12664	-1.40886	1.11563	6.87493	0.00874132	0.126612
wt_h3k4me3.q.05_peak_6476	wt_h3k4me3.q.05_peak_6476	0.467418	3.07962	6.87176	0.00875685	0.126745
wt_h3k4me3.q.05_peak_6127	wt_h3k4me3.q.05_peak_6127	0.22178	5.46573	6.86955	0.00876768	0.126779
wt_h3k4me3.q.05_peak_18439	wt_h3k4me3.q.05_peak_18439	0.876281	1.44162	6.86869	0.00877189	0.126779
wt_h3k4me3.q.05_peak_14686	wt_h3k4me3.q.05_peak_14686	0.480896	3.63831	6.86563	0.00878692	0.126904
wt_h3k4me3.q.05_peak_19112	wt_h3k4me3.q.05_peak_19112	0.101437	7.54331	6.86224	0.00880362	0.127053
wt_h3k4me3.q.05_peak_16129	wt_h3k4me3.q.05_peak_16129	-0.215884	5.26967	6.85857	0.00882173	0.127222
wt_h3k4me3.q.05_peak_6172	wt_h3k4me3.q.05_peak_6172	-0.533441	2.71408	6.85196	0.00885443	0.127493
wt_h3k4me3.q.05_peak_10494	wt_h3k4me3.q.05_peak_10494	-0.617138	2.32344	6.8509	0.00885968	0.127493
wt_h3k4me3.q.05_peak_9031	wt_h3k4me3.q.05_peak_9031	-0.617138	2.32344	6.85089	0.0088597	0.127493
wt_h3k4me3.q.05_peak_8062	wt_h3k4me3.q.05_peak_8062	0.224848	5.14952	6.84838	0.00887215	0.127579
wt_h3k4me3.q.05_peak_13058	wt_h3k4me3.q.05_peak_13058	0.401182	3.49726	6.84199	0.00890396	0.127579
wt_h3k4me3.q.05_peak_15399	wt_h3k4me3.q.05_peak_15399	-0.410351	3.43349	6.84167	0.00890555	0.127579
wt_h3k4me3.q.05_peak_10275	wt_h3k4me3.q.05_peak_10275	0.292936	4.38584	6.84053	0.00891125	0.127579
wt_h3k4me3.q.05_peak_16351	wt_h3k4me3.q.05_peak_16351	-0.990218	1.13581	6.83949	0.00891645	0.127579
wt_h3k4me3.q.05_peak_4141	wt_h3k4me3.q.05_peak_4141	-0.823191	1.58059	6.8381	0.00892335	0.127579
wt_h3k4me3.q.05_peak_13738	wt_h3k4me3.q.05_peak_13738	-0.823191	1.58059	6.8381	0.00892335	0.127579
wt_h3k4me3.q.05_peak_9636	wt_h3k4me3.q.05_peak_9636	-0.823191	1.58059	6.8381	0.00892335	0.127579
wt_h3k4me3.q.05_peak_19415	wt_h3k4me3.q.05_peak_19415	-0.823191	1.58059	6.8381	0.00892335	0.127579
wt_h3k4me3.q.05_peak_15296	wt_h3k4me3.q.05_peak_15296	0.181986	6.28159	6.83177	0.00895506	0.12794
wt_h3k4me3.q.05_peak_13369	wt_h3k4me3.q.05_peak_13369	-0.129731	7.2274	6.82458	0.00899117	0.128364
wt_h3k4me3.q.05_peak_10014	wt_h3k4me3.q.05_peak_10014	-0.728289	1.88475	6.81389	0.00904517	0.128952
wt_h3k4me3.q.05_peak_3019	wt_h3k4me3.q.05_peak_3019	0.334261	4.0048	6.81386	0.00904529	0.128952
wt_h3k4me3.q.05_peak_5776	wt_h3k4me3.q.05_peak_5776	0.153643	6.49238	6.81145	0.00905752	0.129034
wt_h3k4me3.q.05_peak_5892	wt_h3k4me3.q.05_peak_5892	-0.911778	1.45774	6.80968	0.00906649	0.12907
wt_h3k4me3.q.05_peak_19916	wt_h3k4me3.q.05_peak_19916	-0.400668	3.77967	6.80585	0.00908595	0.129254
wt_h3k4me3.q.05_peak_10706	wt_h3k4me3.q.05_peak_10706	-0.331509	5.70398	6.80376	0.00909663	0.129314
wt_h3k4me3.q.05_peak_8722	wt_h3k4me3.q.05_peak_8722	0.387292	3.75378	6.80135	0.00910891	0.129396
wt_h3k4me3.q.05_peak_9502	wt_h3k4me3.q.05_peak_9502	-0.280087	4.50504	6.79946	0.00911855	0.12943
wt_h3k4me3.q.05_peak_7701	wt_h3k4me3.q.05_peak_7701	0.560236	2.63122	6.79833	0.0091243	0.12943
wt_h3k4me3.q.05_peak_12816	wt_h3k4me3.q.05_peak_12816	-0.1479	6.37156	6.79397	0.00914665	0.129655
wt_h3k4me3.q.05_peak_17721	wt_h3k4me3.q.05_peak_17721	-0.593141	2.4171	6.79222	0.00915562	0.129689
wt_h3k4me3.q.05_peak_10823	wt_h3k4me3.q.05_peak_10823	-0.69546	2.12576	6.78755	0.0091796	0.129937
wt_h3k4me3.q.05_peak_14038	wt_h3k4me3.q.05_peak_14038	0.565505	2.54331	6.78105	0.00921309	0.130318
wt_h3k4me3.q.05_peak_7488	wt_h3k4me3.q.05_peak_7488	-0.128073	6.80075	6.7708	0.00926615	0.130947
wt_h3k4me3.q.05_peak_2554	wt_h3k4me3.q.05_peak_2554	0.148129	6.36195	6.76992	0.00927072	0.130947
wt_h3k4me3.q.05_peak_9520	wt_h3k4me3.q.05_peak_9520	-0.14062	6.79402	6.76863	0.0092774	0.130949
wt_h3k4me3.q.05_peak_4415	wt_h3k4me3.q.05_peak_4415	0.413012	3.40051	6.76605	0.00929081	0.130955
wt_h3k4me3.q.05_peak_15394	wt_h3k4me3.q.05_peak_15394	-0.696972	1.98825	6.76515	0.00929552	0.130955
wt_h3k4me3.q.05_peak_6047	wt_h3k4me3.q.05_peak_6047	0.100143	7.56114	6.76475	0.00929758	0.130955
wt_h3k4me3.q.05_peak_13398	wt_h3k4me3.q.05_peak_13398	0.155573	6.78126	6.76137	0.00931521	0.131111
wt_h3k4me3.q.05_peak_11850	wt_h3k4me3.q.05_peak_11850	-0.125592	6.85691	6.75407	0.00935342	0.131537
wt_h3k4me3.q.05_peak_10548	wt_h3k4me3.q.05_peak_10548	-0.57223	2.50504	6.75285	0.00935981	0.131537
wt_h3k4me3.q.05_peak_19018	wt_h3k4me3.q.05_peak_19018	-0.197119	6.7103	6.74749	0.00938795	0.131537
wt_h3k4me3.q.05_peak_3213	wt_h3k4me3.q.05_peak_3213	-0.136098	7.04471	6.74621	0.00939473	0.131537
wt_h3k4me3.q.05_peak_17323	wt_h3k4me3.q.05_peak_17323	0.230406	5.43755	6.74615	0.00939501	0.131537
wt_h3k4me3.q.05_peak_16519	wt_h3k4me3.q.05_peak_16519	-0.175452	5.85311	6.74555	0.00939819	0.131537
wt_h3k4me3.q.05_peak_9608	wt_h3k4me3.q.05_peak_9608	0.231796	5.8223	6.74329	0.00941011	0.131537
wt_h3k4me3.q.05_peak_10972	wt_h3k4me3.q.05_peak_10972	-1.02788	1.03197	6.7425	0.00941424	0.131537
wt_h3k4me3.q.05_peak_17556	wt_h3k4me3.q.05_peak_17556	-1.02788	1.03197	6.7425	0.00941424	0.131537
wt_h3k4me3.q.05_peak_15526	wt_h3k4me3.q.05_peak_15526	0.403322	3.46174	6.74236	0.00941501	0.131537
wt_h3k4me3.q.05_peak_19683	wt_h3k4me3.q.05_peak_19683	-0.928342	1.26966	6.73969	0.00942908	0.131537
wt_h3k4me3.q.05_peak_9119	wt_h3k4me3.q.05_peak_9119	0.102189	7.87764	6.73866	0.00943453	0.131537
wt_h3k4me3.q.05_peak_16935	wt_h3k4me3.q.05_peak_16935	-0.223898	5.59706	6.73803	0.0094379	0.131537
wt_h3k4me3.q.05_peak_19451	wt_h3k4me3.q.05_peak_19451	0.216821	5.2315	6.73801	0.00943797	0.131537
wt_h3k4me3.q.05_peak_15434	wt_h3k4me3.q.05_peak_15434	0.310225	4.1995	6.7325	0.00946716	0.131852
wt_h3k4me3.q.05_peak_18280	wt_h3k4me3.q.05_peak_18280	0.178581	6.04803	6.72559	0.00950391	0.132271
wt_h3k4me3.q.05_peak_10915	wt_h3k4me3.q.05_peak_10915	-0.176397	5.83239	6.72376	0.00951368	0.132315
wt_h3k4me3.q.05_peak_10645	wt_h3k4me3.q.05_peak_10645	0.137404	6.57506	6.71263	0.00957325	0.13305
wt_h3k4me3.q.05_peak_900	wt_h3k4me3.q.05_peak_900	0.124415	6.97291	6.70039	0.0096392	0.133873
wt_h3k4me3.q.05_peak_4218	wt_h3k4me3.q.05_peak_4218	-0.0777777	8.36316	6.69527	0.00966689	0.134164
wt_h3k4me3.q.05_peak_5035	wt_h3k4me3.q.05_peak_5035	0.190418	5.60069	6.69172	0.00968617	0.134338
wt_h3k4me3.q.05_peak_5574	wt_h3k4me3.q.05_peak_5574	-0.878656	1.39215	6.68763	0.00970843	0.134515
wt_h3k4me3.q.05_peak_13555	wt_h3k4me3.q.05_peak_13555	-0.393459	3.57691	6.68603	0.00971713	0.134515
wt_h3k4me3.q.05_peak_9294	wt_h3k4me3.q.05_peak_9294	-0.458247	3.09517	6.68565	0.00971918	0.134515
wt_h3k4me3.q.05_peak_5009	wt_h3k4me3.q.05_peak_5009	0.116368	7.07408	6.68136	0.00974262	0.13466
wt_h3k4me3.q.05_peak_16789	wt_h3k4me3.q.05_peak_16789	0.628579	2.24201	6.68126	0.00974319	0.13466
wt_h3k4me3.q.05_peak_19584	wt_h3k4me3.q.05_peak_19584	-0.601024	2.3582	6.67431	0.00978124	0.135092
wt_h3k4me3.q.05_peak_6557	wt_h3k4me3.q.05_peak_6557	0.499929	2.85463	6.67283	0.00978934	0.135099
wt_h3k4me3.q.05_peak_20639	wt_h3k4me3.q.05_peak_20639	-0.837859	1.50504	6.67052	0.00980207	0.135099
wt_h3k4me3.q.05_peak_897	wt_h3k4me3.q.05_peak_897	-0.837859	1.50504	6.67051	0.00980209	0.135099
wt_h3k4me3.q.05_peak_19342	wt_h3k4me3.q.05_peak_19342	-1.07341	0.92008	6.66753	0.00981852	0.13513
wt_h3k4me3.q.05_peak_14782	wt_h3k4me3.q.05_peak_14782	0.2168	5.21618	6.66644	0.00982452	0.13513
wt_h3k4me3.q.05_peak_8674	wt_h3k4me3.q.05_peak_8674	0.642861	2.2968	6.66541	0.00983023	0.13513
wt_h3k4me3.q.05_peak_15794	wt_h3k4me3.q.05_peak_15794	-0.221593	5.152	6.66518	0.00983148	0.13513
wt_h3k4me3.q.05_peak_17464	wt_h3k4me3.q.05_peak_17464	-0.149233	6.31517	6.66072	0.00985609	0.135375
wt_h3k4me3.q.05_peak_16569	wt_h3k4me3.q.05_peak_16569	-0.425768	3.29231	6.65634	0.00988035	0.135615
wt_h3k4me3.q.05_peak_6282	wt_h3k4me3.q.05_peak_6282	-0.685052	2.01028	6.65124	0.0099087	0.13591
wt_h3k4me3.q.05_peak_6875	wt_h3k4me3.q.05_peak_6875	-0.618107	2.27877	6.64867	0.00992301	0.136013
wt_h3k4me3.q.05_peak_6309	wt_h3k4me3.q.05_peak_6309	0.200081	5.648	6.64342	0.00995228	0.136149
wt_h3k4me3.q.05_peak_477	wt_h3k4me3.q.05_peak_477	-0.960502	1.28781	6.64332	0.00995282	0.136149
wt_h3k4me3.q.05_peak_18771	wt_h3k4me3.q.05_peak_18771	0.262377	4.96447	6.64321	0.00995344	0.136149
wt_h3k4me3.q.05_peak_19389	wt_h3k4me3.q.05_peak_19389	-0.148786	6.31959	6.64068	0.00996759	0.136233
wt_h3k4me3.q.05_peak_18397	wt_h3k4me3.q.05_peak_18397	0.190681	5.58518	6.63966	0.0099733	0.136233
wt_h3k4me3.q.05_peak_10651	wt_h3k4me3.q.05_peak_10651	-0.27342	4.53953	6.63805	0.0099823	0.136263
wt_h3k4me3.q.05_peak_16974	wt_h3k4me3.q.05_peak_16974	-0.230913	5.02523	6.63194	0.0100166	0.136637
wt_h3k4me3.q.05_peak_17569	wt_h3k4me3.q.05_peak_17569	0.307474	4.63122	6.62923	0.0100318	0.136752
wt_h3k4me3.q.05_peak_15870	wt_h3k4me3.q.05_peak_15870	-0.135737	6.59068	6.61973	0.0100855	0.137297
wt_h3k4me3.q.05_peak_6916	wt_h3k4me3.q.05_peak_6916	-0.0697635	8.70862	6.61911	0.010089	0.137297
wt_h3k4me3.q.05_peak_17991	wt_h3k4me3.q.05_peak_17991	-1.20072	0.666323	6.61849	0.0100925	0.137297
wt_h3k4me3.q.05_peak_6109	wt_h3k4me3.q.05_peak_6109	0.101931	7.4702	6.61654	0.0101036	0.137354
wt_h3k4me3.q.05_peak_20290	wt_h3k4me3.q.05_peak_20290	0.231897	5.00891	6.61188	0.0101301	0.13762
wt_h3k4me3.q.05_peak_2080	wt_h3k4me3.q.05_peak_2080	-0.934446	1.37527	6.60994	0.0101411	0.137676
wt_h3k4me3.q.05_peak_19587	wt_h3k4me3.q.05_peak_19587	0.372923	3.65238	6.60694	0.0101582	0.137814
wt_h3k4me3.q.05_peak_3429	wt_h3k4me3.q.05_peak_3429	-0.694252	2.25129	6.60125	0.0101907	0.138108
wt_h3k4me3.q.05_peak_6248	wt_h3k4me3.q.05_peak_6248	0.520992	2.72743	6.60072	0.0101937	0.138108
wt_h3k4me3.q.05_peak_4481	wt_h3k4me3.q.05_peak_4481	-0.110371	7.21796	6.59744	0.0102125	0.138207
wt_h3k4me3.q.05_peak_6813	wt_h3k4me3.q.05_peak_6813	0.132765	6.74108	6.59702	0.010215	0.138207
wt_h3k4me3.q.05_peak_15491	wt_h3k4me3.q.05_peak_15491	-0.129399	6.72952	6.59444	0.0102298	0.138314
wt_h3k4me3.q.05_peak_8113	wt_h3k4me3.q.05_peak_8113	0.20751	5.54614	6.59257	0.0102405	0.138365
wt_h3k4me3.q.05_peak_1678	wt_h3k4me3.q.05_peak_1678	-0.593285	2.37528	6.58946	0.0102584	0.138436
wt_h3k4me3.q.05_peak_3360	wt_h3k4me3.q.05_peak_3360	-0.141551	6.45724	6.58925	0.0102596	0.138436
wt_h3k4me3.q.05_peak_19242	wt_h3k4me3.q.05_peak_19242	-0.735428	1.92008	6.58746	0.01027	0.138481
wt_h3k4me3.q.05_peak_1653	wt_h3k4me3.q.05_peak_1653	0.857996	1.52047	6.58491	0.0102847	0.138487
wt_h3k4me3.q.05_peak_1453	wt_h3k4me3.q.05_peak_1453	-0.104512	7.38453	6.58453	0.0102869	0.138487
wt_h3k4me3.q.05_peak_2780	wt_h3k4me3.q.05_peak_2780	0.565052	2.50504	6.58339	0.0102935	0.138487
wt_h3k4me3.q.05_peak_11974	wt_h3k4me3.q.05_peak_11974	-0.139488	6.4997	6.58164	0.0103036	0.138487
wt_h3k4me3.q.05_peak_5920	wt_h3k4me3.q.05_peak_5920	-0.180541	5.73242	6.58137	0.0103051	0.138487
wt_h3k4me3.q.05_peak_10580	wt_h3k4me3.q.05_peak_10580	-0.132216	6.83394	6.57768	0.0103265	0.138629
wt_h3k4me3.q.05_peak_9792	wt_h3k4me3.q.05_peak_9792	0.570771	3.10031	6.57714	0.0103296	0.138629
wt_h3k4me3.q.05_peak_1241	wt_h3k4me3.q.05_peak_1241	0.418418	3.32343	6.57193	0.0103599	0.138942
wt_h3k4me3.q.05_peak_10051	wt_h3k4me3.q.05_peak_10051	0.0901866	7.84833	6.57067	0.0103673	0.138947
wt_h3k4me3.q.05_peak_13227	wt_h3k4me3.q.05_peak_13227	0.456721	3.29231	6.56918	0.010376	0.13897
wt_h3k4me3.q.05_peak_2788	wt_h3k4me3.q.05_peak_2788	-0.196149	5.48454	6.56094	0.0104241	0.139477
wt_h3k4me3.q.05_peak_5738	wt_h3k4me3.q.05_peak_5738	-0.170649	5.89367	6.55918	0.0104345	0.139477
wt_h3k4me3.q.05_peak_9416	wt_h3k4me3.q.05_peak_9416	-0.121916	7.24347	6.55911	0.0104349	0.139477
wt_h3k4me3.q.05_peak_15336	wt_h3k4me3.q.05_peak_15336	0.31671	4.10287	6.55678	0.0104485	0.139522
wt_h3k4me3.q.05_peak_10790	wt_h3k4me3.q.05_peak_10790	0.179151	5.9453	6.55615	0.0104522	0.139522
wt_h3k4me3.q.05_peak_7362	wt_h3k4me3.q.05_peak_7362	-0.309385	4.16801	6.55291	0.0104713	0.139683
wt_h3k4me3.q.05_peak_16329	wt_h3k4me3.q.05_peak_16329	-0.139755	6.48651	6.54969	0.0104903	0.139717
wt_h3k4me3.q.05_peak_2035	wt_h3k4me3.q.05_peak_2035	-0.131764	6.66416	6.54933	0.0104924	0.139717
wt_h3k4me3.q.05_peak_14788	wt_h3k4me3.q.05_peak_14788	0.391866	3.50116	6.5489	0.0104949	0.139717
wt_h3k4me3.q.05_peak_6740	wt_h3k4me3.q.05_peak_6740	0.578654	2.43349	6.54504	0.0105177	0.139843
wt_h3k4me3.q.05_peak_6942	wt_h3k4me3.q.05_peak_6942	-0.19836	6.02455	6.54492	0.0105184	0.139843
wt_h3k4me3.q.05_peak_11761	wt_h3k4me3.q.05_peak_11761	-0.900058	1.30573	6.53919	0.0105524	0.140201
wt_h3k4me3.q.05_peak_6385	wt_h3k4me3.q.05_peak_6385	0.11826	7.1207	6.5329	0.0105897	0.140462
wt_h3k4me3.q.05_peak_8891	wt_h3k4me3.q.05_peak_8891	0.239986	4.89218	6.53241	0.0105926	0.140462
wt_h3k4me3.q.05_peak_20482	wt_h3k4me3.q.05_peak_20482	0.167103	5.94959	6.53086	0.0106019	0.140462
wt_h3k4me3.q.05_peak_13571	wt_h3k4me3.q.05_peak_13571	-0.161628	6.04804	6.53074	0.0106026	0.140462
wt_h3k4me3.q.05_peak_9366	wt_h3k4me3.q.05_peak_9366	-0.785228	1.63831	6.52877	0.0106144	0.140462
wt_h3k4me3.q.05_peak_17793	wt_h3k4me3.q.05_peak_17793	-0.785228	1.63831	6.52876	0.0106144	0.140462
wt_h3k4me3.q.05_peak_9071	wt_h3k4me3.q.05_peak_9071	0.454523	3.08482	6.52673	0.0106265	0.14053
wt_h3k4me3.q.05_peak_18729	wt_h3k4me3.q.05_peak_18729	0.219031	5.15447	6.52178	0.0106561	0.140828
wt_h3k4me3.q.05_peak_16259	wt_h3k4me3.q.05_peak_16259	0.593849	2.3582	6.51479	0.0106981	0.141289
wt_h3k4me3.q.05_peak_11743	wt_h3k4me3.q.05_peak_11743	-0.854489	1.42532	6.50765	0.0107411	0.141611
wt_h3k4me3.q.05_peak_6932	wt_h3k4me3.q.05_peak_6932	-0.854489	1.42532	6.50765	0.0107412	0.141611
wt_h3k4me3.q.05_peak_3062	wt_h3k4me3.q.05_peak_3062	-0.154781	6.17107	6.50662	0.0107474	0.141611
wt_h3k4me3.q.05_peak_12026	wt_h3k4me3.q.05_peak_12026	0.162723	6.02252	6.50603	0.0107509	0.141611
wt_h3k4me3.q.05_peak_13909	wt_h3k4me3.q.05_peak_13909	0.29987	4.24665	6.50372	0.0107649	0.141701
wt_h3k4me3.q.05_peak_17799	wt_h3k4me3.q.05_peak_17799	0.101151	7.46722	6.50156	0.010778	0.14178
wt_h3k4me3.q.05_peak_3245	wt_h3k4me3.q.05_peak_3245	-0.989524	1.07441	6.49782	0.0108007	0.141984
wt_h3k4me3.q.05_peak_25	wt_h3k4me3.q.05_peak_25	-0.185594	6.07048	6.49508	0.0108173	0.14211
wt_h3k4me3.q.05_peak_14325	wt_h3k4me3.q.05_peak_14325	0.157662	6.11308	6.49155	0.0108388	0.142298
wt_h3k4me3.q.05_peak_5727	wt_h3k4me3.q.05_peak_5727	0.158758	6.09194	6.4893	0.0108526	0.142385
wt_h3k4me3.q.05_peak_17577	wt_h3k4me3.q.05_peak_17577	0.211725	6.3979	6.4832	0.0108899	0.14278
wt_h3k4me3.q.05_peak_17451	wt_h3k4me3.q.05_peak_17451	0.243763	4.8347	6.47671	0.0109297	0.143208
wt_h3k4me3.q.05_peak_10891	wt_h3k4me3.q.05_peak_10891	-0.142056	6.42019	6.47524	0.0109387	0.143232
wt_h3k4me3.q.05_peak_3480	wt_h3k4me3.q.05_peak_3480	0.499696	3.17045	6.46932	0.0109753	0.143465
wt_h3k4me3.q.05_peak_19290	wt_h3k4me3.q.05_peak_19290	0.37224	3.62766	6.46895	0.0109775	0.143465
wt_h3k4me3.q.05_peak_14241	wt_h3k4me3.q.05_peak_14241	0.10993	7.1998	6.46886	0.0109781	0.143465
wt_h3k4me3.q.05_peak_13970	wt_h3k4me3.q.05_peak_13970	-0.477166	2.93743	6.46537	0.0109997	0.143652
wt_h3k4me3.q.05_peak_20601	wt_h3k4me3.q.05_peak_20601	-0.149156	6.27138	6.4622	0.0110193	0.143814
wt_h3k4me3.q.05_peak_1911	wt_h3k4me3.q.05_peak_1911	-0.1686	5.96165	6.46044	0.0110302	0.143862
wt_h3k4me3.q.05_peak_1607	wt_h3k4me3.q.05_peak_1607	-0.39235	3.63477	6.45496	0.0110643	0.1441
wt_h3k4me3.q.05_peak_18138	wt_h3k4me3.q.05_peak_18138	-0.658392	2.57321	6.45425	0.0110687	0.1441
wt_h3k4me3.q.05_peak_16346	wt_h3k4me3.q.05_peak_16346	0.726797	2.72743	6.45402	0.0110701	0.1441
wt_h3k4me3.q.05_peak_18900	wt_h3k4me3.q.05_peak_18900	-0.235813	4.92444	6.45165	0.0110849	0.144198
wt_h3k4me3.q.05_peak_18409	wt_h3k4me3.q.05_peak_18409	0.165088	5.96658	6.44821	0.0111064	0.144277
wt_h3k4me3.q.05_peak_13056	wt_h3k4me3.q.05_peak_13056	0.23434	5.59068	6.44736	0.0111117	0.144277
wt_h3k4me3.q.05_peak_12695	wt_h3k4me3.q.05_peak_12695	0.0945698	7.66632	6.4472	0.0111127	0.144277
wt_h3k4me3.q.05_peak_18477	wt_h3k4me3.q.05_peak_18477	-0.133047	6.61019	6.44328	0.0111373	0.144475
wt_h3k4me3.q.05_peak_8640	wt_h3k4me3.q.05_peak_8640	0.124361	6.81489	6.44167	0.0111474	0.144475
wt_h3k4me3.q.05_peak_17116	wt_h3k4me3.q.05_peak_17116	0.147996	6.29006	6.44129	0.0111497	0.144475
wt_h3k4me3.q.05_peak_15482	wt_h3k4me3.q.05_peak_15482	0.239248	4.87877	6.43267	0.011204	0.145084
wt_h3k4me3.q.05_peak_20187	wt_h3k4me3.q.05_peak_20187	0.552006	2.53574	6.43125	0.011213	0.145106
wt_h3k4me3.q.05_peak_13960	wt_h3k4me3.q.05_peak_13960	-0.261084	4.62588	6.42875	0.0112288	0.145216
wt_h3k4me3.q.05_peak_6959	wt_h3k4me3.q.05_peak_6959	0.183974	6.32673	6.42733	0.0112377	0.145237
wt_h3k4me3.q.05_peak_11633	wt_h3k4me3.q.05_peak_11633	-0.153998	6.16679	6.4223	0.0112696	0.145555
wt_h3k4me3.q.05_peak_1784	wt_h3k4me3.q.05_peak_1784	-0.313327	4.10288	6.42056	0.0112807	0.145603
wt_h3k4me3.q.05_peak_1555	wt_h3k4me3.q.05_peak_1555	0.158259	6.08482	6.41796	0.0112972	0.145717
wt_h3k4me3.q.05_peak_18744	wt_h3k4me3.q.05_peak_18744	0.206272	5.43349	6.41687	0.0113041	0.145717
wt_h3k4me3.q.05_peak_3426	wt_h3k4me3.q.05_peak_3426	0.199645	5.43654	6.41564	0.0113119	0.145723
wt_h3k4me3.q.05_peak_6634	wt_h3k4me3.q.05_peak_6634	-0.498679	2.80509	6.40996	0.0113482	0.146082
wt_h3k4me3.q.05_peak_5605	wt_h3k4me3.q.05_peak_5605	0.778081	1.63831	6.40898	0.0113545	0.146082
wt_h3k4me3.q.05_peak_3327	wt_h3k4me3.q.05_peak_3327	-1.02926	0.965884	6.40134	0.0114034	0.146194
wt_h3k4me3.q.05_peak_5122	wt_h3k4me3.q.05_peak_5122	-1.02926	0.965884	6.40134	0.0114034	0.146194
wt_h3k4me3.q.05_peak_9441	wt_h3k4me3.q.05_peak_9441	-1.02926	0.965884	6.40134	0.0114035	0.146194
wt_h3k4me3.q.05_peak_18284	wt_h3k4me3.q.05_peak_18284	-0.122491	7.38453	6.40091	0.0114062	0.146194
wt_h3k4me3.q.05_peak_18238	wt_h3k4me3.q.05_peak_18238	-0.924885	1.21381	6.39945	0.0114156	0.146194
wt_h3k4me3.q.05_peak_8255	wt_h3k4me3.q.05_peak_8255	-0.924885	1.21381	6.39945	0.0114156	0.146194
wt_h3k4me3.q.05_peak_14674	wt_h3k4me3.q.05_peak_14674	-0.160991	6.02928	6.39855	0.0114213	0.146194
wt_h3k4me3.q.05_peak_13424	wt_h3k4me3.q.05_peak_13424	0.118545	6.95065	6.39847	0.0114218	0.146194
wt_h3k4me3.q.05_peak_5414	wt_h3k4me3.q.05_peak_5414	-0.448932	3.09001	6.39604	0.0114375	0.146299
wt_h3k4me3.q.05_peak_10229	wt_h3k4me3.q.05_peak_10229	0.74352	2.46573	6.39492	0.0114448	0.146299
wt_h3k4me3.q.05_peak_7347	wt_h3k4me3.q.05_peak_7347	0.188947	5.55647	6.39353	0.0114537	0.14632
wt_h3k4me3.q.05_peak_5105	wt_h3k4me3.q.05_peak_5105	-0.168978	6.07702	6.39017	0.0114754	0.146345
wt_h3k4me3.q.05_peak_2663	wt_h3k4me3.q.05_peak_2663	0.204919	5.55084	6.39006	0.0114761	0.146345
wt_h3k4me3.q.05_peak_5312	wt_h3k4me3.q.05_peak_5312	-0.167711	5.9062	6.38981	0.0114777	0.146345
wt_h3k4me3.q.05_peak_8398	wt_h3k4me3.q.05_peak_8398	0.33546	3.90252	6.38699	0.011496	0.146484
wt_h3k4me3.q.05_peak_3220	wt_h3k4me3.q.05_peak_3220	0.124026	6.8098	6.38582	0.0115036	0.146487
wt_h3k4me3.q.05_peak_19493	wt_h3k4me3.q.05_peak_19493	0.116553	6.9993	6.38369	0.0115174	0.146569
wt_h3k4me3.q.05_peak_14305	wt_h3k4me3.q.05_peak_14305	-0.145151	6.33385	6.38165	0.0115306	0.146581
wt_h3k4me3.q.05_peak_18519	wt_h3k4me3.q.05_peak_18519	-0.665008	2.68698	6.38127	0.0115331	0.146581
wt_h3k4me3.q.05_peak_11965	wt_h3k4me3.q.05_peak_11965	0.44428	3.11563	6.37865	0.0115501	0.146705
wt_h3k4me3.q.05_peak_8403	wt_h3k4me3.q.05_peak_8403	-0.235945	4.90546	6.37493	0.0115744	0.146918
wt_h3k4me3.q.05_peak_8929	wt_h3k4me3.q.05_peak_8929	0.38318	3.64184	6.37379	0.0115818	0.146919
wt_h3k4me3.q.05_peak_17440	wt_h3k4me3.q.05_peak_17440	0.20336	5.33657	6.37184	0.0115946	0.146987
wt_h3k4me3.q.05_peak_2261	wt_h3k4me3.q.05_peak_2261	0.713599	1.84853	6.36721	0.0116248	0.147138
wt_h3k4me3.q.05_peak_15346	wt_h3k4me3.q.05_peak_15346	0.845625	2.60974	6.36692	0.0116267	0.147138
wt_h3k4me3.q.05_peak_5252	wt_h3k4me3.q.05_peak_5252	0.142549	6.38479	6.36664	0.0116286	0.147138
wt_h3k4me3.q.05_peak_9541	wt_h3k4me3.q.05_peak_9541	-0.192314	5.79402	6.36447	0.0116428	0.147224
wt_h3k4me3.q.05_peak_3655	wt_h3k4me3.q.05_peak_3655	-0.101596	7.41916	6.36276	0.011654	0.147273
wt_h3k4me3.q.05_peak_5370	wt_h3k4me3.q.05_peak_5370	-0.141568	6.40364	6.35954	0.0116752	0.147426
wt_h3k4me3.q.05_peak_3445	wt_h3k4me3.q.05_peak_3445	0.328277	3.9574	6.35867	0.0116809	0.147426
wt_h3k4me3.q.05_peak_19515	wt_h3k4me3.q.05_peak_19515	0.162797	5.98617	6.35406	0.0117113	0.147628
wt_h3k4me3.q.05_peak_8573	wt_h3k4me3.q.05_peak_8573	-0.136539	6.51037	6.35238	0.0117224	0.147628
wt_h3k4me3.q.05_peak_854	wt_h3k4me3.q.05_peak_854	-0.873504	1.34092	6.35052	0.0117347	0.147628
wt_h3k4me3.q.05_peak_17470	wt_h3k4me3.q.05_peak_17470	-0.116293	6.99759	6.35004	0.0117379	0.147628
wt_h3k4me3.q.05_peak_7302	wt_h3k4me3.q.05_peak_7302	-0.0978406	7.5348	6.34947	0.0117416	0.147628
wt_h3k4me3.q.05_peak_14603	wt_h3k4me3.q.05_peak_14603	-0.120987	6.87578	6.34733	0.0117558	0.147628
wt_h3k4me3.q.05_peak_18386	wt_h3k4me3.q.05_peak_18386	-0.119589	6.91133	6.34728	0.0117561	0.147628
wt_h3k4me3.q.05_peak_7603	wt_h3k4me3.q.05_peak_7603	0.280045	4.40675	6.34624	0.011763	0.147628
wt_h3k4me3.q.05_peak_332	wt_h3k4me3.q.05_peak_332	0.360777	4.34092	6.34614	0.0117637	0.147628
wt_h3k4me3.q.05_peak_11910	wt_h3k4me3.q.05_peak_11910	0.13579	6.52382	6.33754	0.0118209	0.148051
wt_h3k4me3.q.05_peak_7216	wt_h3k4me3.q.05_peak_7216	-0.831656	1.45774	6.3373	0.0118225	0.148051
wt_h3k4me3.q.05_peak_20458	wt_h3k4me3.q.05_peak_20458	0.42159	3.25128	6.33635	0.0118288	0.148051
wt_h3k4me3.q.05_peak_7682	wt_h3k4me3.q.05_peak_7682	0.364673	3.65588	6.33583	0.0118323	0.148051
wt_h3k4me3.q.05_peak_10703	wt_h3k4me3.q.05_peak_10703	0.451896	3.36249	6.33441	0.0118417	0.148051
wt_h3k4me3.q.05_peak_12860	wt_h3k4me3.q.05_peak_12860	0.170244	5.84929	6.33437	0.011842	0.148051
wt_h3k4me3.q.05_peak_19696	wt_h3k4me3.q.05_peak_19696	-0.255848	5.36783	6.33277	0.0118527	0.148092
wt_h3k4me3.q.05_peak_4079	wt_h3k4me3.q.05_peak_4079	0.430836	3.18988	6.33037	0.0118688	0.148187
wt_h3k4me3.q.05_peak_7032	wt_h3k4me3.q.05_peak_7032	0.146567	6.29287	6.3294	0.0118752	0.148187
wt_h3k4me3.q.05_peak_15971	wt_h3k4me3.q.05_peak_15971	-0.883426	1.44162	6.32572	0.0118999	0.148331
wt_h3k4me3.q.05_peak_18115	wt_h3k4me3.q.05_peak_18115	0.836472	1.55085	6.32458	0.0119076	0.148331
wt_h3k4me3.q.05_peak_2877	wt_h3k4me3.q.05_peak_2877	0.253425	5.0731	6.32436	0.0119091	0.148331
wt_h3k4me3.q.05_peak_6427	wt_h3k4me3.q.05_peak_6427	-0.854494	1.42532	6.31909	0.0119445	0.148613
wt_h3k4me3.q.05_peak_15414	wt_h3k4me3.q.05_peak_15414	0.186512	6.16555	6.31808	0.0119513	0.148613
wt_h3k4me3.q.05_peak_3769	wt_h3k4me3.q.05_peak_3769	-0.398272	3.44566	6.31767	0.0119541	0.148613
wt_h3k4me3.q.05_peak_10303	wt_h3k4me3.q.05_peak_10303	-0.85406	1.63831	6.31443	0.0119759	0.148787
wt_h3k4me3.q.05_peak_8826	wt_h3k4me3.q.05_peak_8826	0.286918	4.33002	6.31338	0.011983	0.148787
wt_h3k4me3.q.05_peak_1168	wt_h3k4me3.q.05_peak_1168	-0.152572	6.16862	6.3113	0.0119971	0.148821
wt_h3k4me3.q.05_peak_12959	wt_h3k4me3.q.05_peak_12959	-0.147892	6.26108	6.30974	0.0120076	0.148821
wt_h3k4me3.q.05_peak_15544	wt_h3k4me3.q.05_peak_15544	0.557787	2.48158	6.3089	0.0120133	0.148821
wt_h3k4me3.q.05_peak_1867	wt_h3k4me3.q.05_peak_1867	0.160456	6.01845	6.30855	0.0120157	0.148821
wt_h3k4me3.q.05_peak_19255	wt_h3k4me3.q.05_peak_19255	0.201169	5.35174	6.30061	0.0120696	0.14933
wt_h3k4me3.q.05_peak_14187	wt_h3k4me3.q.05_peak_14187	0.142077	6.37898	6.3003	0.0120717	0.14933
wt_h3k4me3.q.05_peak_19466	wt_h3k4me3.q.05_peak_19466	-0.155828	6.1016	6.29414	0.0121138	0.149666
wt_h3k4me3.q.05_peak_5036	wt_h3k4me3.q.05_peak_5036	-0.489577	2.83007	6.29412	0.0121139	0.149666
wt_h3k4me3.q.05_peak_11935	wt_h3k4me3.q.05_peak_11935	-1.13858	0.720771	6.28782	0.0121571	0.150105
wt_h3k4me3.q.05_peak_10445	wt_h3k4me3.q.05_peak_10445	-0.127336	6.70482	6.28404	0.012183	0.150332
wt_h3k4me3.q.05_peak_15487	wt_h3k4me3.q.05_peak_15487	-1.18386	1.05335	6.27789	0.0122254	0.150747
wt_h3k4me3.q.05_peak_6206	wt_h3k4me3.q.05_peak_6206	0.100349	7.43654	6.27399	0.0122523	0.150747
wt_h3k4me3.q.05_peak_4727	wt_h3k4me3.q.05_peak_4727	-0.104628	7.30546	6.27371	0.0122542	0.150747
wt_h3k4me3.q.05_peak_10242	wt_h3k4me3.q.05_peak_10242	-0.133079	6.56905	6.27339	0.0122564	0.150747
wt_h3k4me3.q.05_peak_16857	wt_h3k4me3.q.05_peak_16857	0.38419	3.58427	6.27195	0.0122664	0.150747
wt_h3k4me3.q.05_peak_18832	wt_h3k4me3.q.05_peak_18832	-0.954035	1.11563	6.27071	0.012275	0.150747
wt_h3k4me3.q.05_peak_829	wt_h3k4me3.q.05_peak_829	-0.954035	1.11563	6.27071	0.012275	0.150747
wt_h3k4me3.q.05_peak_11003	wt_h3k4me3.q.05_peak_11003	0.174334	5.76435	6.27019	0.0122786	0.150747
wt_h3k4me3.q.05_peak_9581	wt_h3k4me3.q.05_peak_9581	-0.132995	6.56998	6.26931	0.0122847	0.150747
wt_h3k4me3.q.05_peak_16814	wt_h3k4me3.q.05_peak_16814	-0.142611	6.35981	6.26808	0.0122933	0.150759
wt_h3k4me3.q.05_peak_8517	wt_h3k4me3.q.05_peak_8517	-0.14686	6.27138	6.26523	0.012313	0.150909
wt_h3k4me3.q.05_peak_8070	wt_h3k4me3.q.05_peak_8070	-0.153827	6.13268	6.26289	0.0123293	0.150922
wt_h3k4me3.q.05_peak_539	wt_h3k4me3.q.05_peak_539	0.126579	6.71784	6.26186	0.0123364	0.150922
wt_h3k4me3.q.05_peak_4447	wt_h3k4me3.q.05_peak_4447	0.161796	5.98269	6.26158	0.0123384	0.150922
wt_h3k4me3.q.05_peak_9978	wt_h3k4me3.q.05_peak_9978	0.199937	5.36034	6.26071	0.0123445	0.150922
wt_h3k4me3.q.05_peak_12850	wt_h3k4me3.q.05_peak_12850	0.16539	5.91498	6.24991	0.0124199	0.151752
wt_h3k4me3.q.05_peak_13294	wt_h3k4me3.q.05_peak_13294	-0.750701	1.6938	6.24671	0.0124424	0.15184
wt_h3k4me3.q.05_peak_13084	wt_h3k4me3.q.05_peak_13084	-0.750701	1.6938	6.24671	0.0124424	0.15184
wt_h3k4me3.q.05_peak_17297	wt_h3k4me3.q.05_peak_17297	0.699875	1.87277	6.24549	0.012451	0.151844
wt_h3k4me3.q.05_peak_4370	wt_h3k4me3.q.05_peak_4370	0.148168	6.58747	6.2445	0.012458	0.151844
wt_h3k4me3.q.05_peak_13504	wt_h3k4me3.q.05_peak_13504	-0.192388	5.46772	6.24042	0.0124867	0.152101
wt_h3k4me3.q.05_peak_7816	wt_h3k4me3.q.05_peak_7816	-1.07107	1.55085	6.23719	0.0125095	0.152285
wt_h3k4me3.q.05_peak_3107	wt_h3k4me3.q.05_peak_3107	-0.665523	1.99931	6.23542	0.012522	0.152344
wt_h3k4me3.q.05_peak_12329	wt_h3k4me3.q.05_peak_12329	0.767636	1.70735	6.23307	0.0125386	0.152454
wt_h3k4me3.q.05_peak_20420	wt_h3k4me3.q.05_peak_20420	-0.177474	5.70229	6.23126	0.0125514	0.152516
wt_h3k4me3.q.05_peak_19179	wt_h3k4me3.q.05_peak_19179	0.0751052	8.3586	6.22957	0.0125634	0.152548
wt_h3k4me3.q.05_peak_6684	wt_h3k4me3.q.05_peak_6684	-0.6091	2.77324	6.22873	0.0125694	0.152548
wt_h3k4me3.q.05_peak_16021	wt_h3k4me3.q.05_peak_16021	0.267053	4.5147	6.22359	0.0126059	0.152862
wt_h3k4me3.q.05_peak_256	wt_h3k4me3.q.05_peak_256	-0.230316	4.9403	6.22293	0.0126106	0.152862
wt_h3k4me3.q.05_peak_17622	wt_h3k4me3.q.05_peak_17622	0.145145	6.29568	6.21927	0.0126367	0.153019
wt_h3k4me3.q.05_peak_180	wt_h3k4me3.q.05_peak_180	-0.38061	3.50892	6.21811	0.012645	0.153019
wt_h3k4me3.q.05_peak_9292	wt_h3k4me3.q.05_peak_9292	-0.132701	6.82853	6.21789	0.0126466	0.153019
wt_h3k4me3.q.05_peak_5526	wt_h3k4me3.q.05_peak_5526	-0.275558	4.83779	6.21256	0.0126847	0.153319
wt_h3k4me3.q.05_peak_2157	wt_h3k4me3.q.05_peak_2157	-0.496579	2.77324	6.2119	0.0126895	0.153319
wt_h3k4me3.q.05_peak_12446	wt_h3k4me3.q.05_peak_12446	-0.127534	6.68271	6.2112	0.0126945	0.153319
wt_h3k4me3.q.05_peak_2354	wt_h3k4me3.q.05_peak_2354	0.236696	4.85766	6.20555	0.012735	0.153639
wt_h3k4me3.q.05_peak_18547	wt_h3k4me3.q.05_peak_18547	-0.777927	1.59524	6.20228	0.0127586	0.153639
wt_h3k4me3.q.05_peak_1604	wt_h3k4me3.q.05_peak_1604	-0.20856	5.22327	6.20208	0.01276	0.153639
wt_h3k4me3.q.05_peak_10558	wt_h3k4me3.q.05_peak_10558	-0.895458	1.25129	6.20048	0.0127716	0.153639
wt_h3k4me3.q.05_peak_19278	wt_h3k4me3.q.05_peak_19278	-0.895458	1.25129	6.20048	0.0127716	0.153639
wt_h3k4me3.q.05_peak_13485	wt_h3k4me3.q.05_peak_13485	0.139959	6.39999	6.20004	0.0127748	0.153639
wt_h3k4me3.q.05_peak_2774	wt_h3k4me3.q.05_peak_2774	0.154305	6.10862	6.20001	0.012775	0.153639
wt_h3k4me3.q.05_peak_13015	wt_h3k4me3.q.05_peak_13015	-0.151024	6.17168	6.19743	0.0127936	0.153764
wt_h3k4me3.q.05_peak_17488	wt_h3k4me3.q.05_peak_17488	0.251418	6.72701	6.19643	0.0128008	0.153764
wt_h3k4me3.q.05_peak_9705	wt_h3k4me3.q.05_peak_9705	-0.104854	7.2782	6.18999	0.0128475	0.154215
wt_h3k4me3.q.05_peak_8465	wt_h3k4me3.q.05_peak_8465	0.261947	4.56207	6.18911	0.0128539	0.154215
wt_h3k4me3.q.05_peak_10473	wt_h3k4me3.q.05_peak_10473	-0.169763	5.82231	6.18607	0.012876	0.154257
wt_h3k4me3.q.05_peak_10515	wt_h3k4me3.q.05_peak_10515	0.199724	5.59978	6.18443	0.0128879	0.154257
wt_h3k4me3.q.05_peak_6196	wt_h3k4me3.q.05_peak_6196	-0.593603	2.28781	6.18385	0.0128922	0.154257
wt_h3k4me3.q.05_peak_11830	wt_h3k4me3.q.05_peak_11830	0.10063	7.40415	6.1835	0.0128947	0.154257
wt_h3k4me3.q.05_peak_12745	wt_h3k4me3.q.05_peak_12745	0.0982724	7.47961	6.18331	0.0128961	0.154257
wt_h3k4me3.q.05_peak_12157	wt_h3k4me3.q.05_peak_12157	-0.141332	7.04604	6.18	0.0129202	0.154453
wt_h3k4me3.q.05_peak_19759	wt_h3k4me3.q.05_peak_19759	0.118362	6.90141	6.17688	0.012943	0.154633
wt_h3k4me3.q.05_peak_18562	wt_h3k4me3.q.05_peak_18562	-0.792056	1.68013	6.17453	0.0129603	0.154633
wt_h3k4me3.q.05_peak_2502	wt_h3k4me3.q.05_peak_2502	0.174697	5.80035	6.17282	0.0129728	0.154633
wt_h3k4me3.q.05_peak_13579	wt_h3k4me3.q.05_peak_13579	-0.196426	5.3911	6.17275	0.0129733	0.154633
wt_h3k4me3.q.05_peak_2735	wt_h3k4me3.q.05_peak_2735	0.598966	2.98269	6.17264	0.0129741	0.154633
wt_h3k4me3.q.05_peak_9982	wt_h3k4me3.q.05_peak_9982	0.71054	2.64536	6.17032	0.0129911	0.154743
wt_h3k4me3.q.05_peak_11498	wt_h3k4me3.q.05_peak_11498	0.145927	6.26623	6.16385	0.0130387	0.155218
wt_h3k4me3.q.05_peak_10583	wt_h3k4me3.q.05_peak_10583	0.130102	6.77806	6.1607	0.013062	0.155397
wt_h3k4me3.q.05_peak_11070	wt_h3k4me3.q.05_peak_11070	0.127571	6.66935	6.15969	0.0130694	0.155397
wt_h3k4me3.q.05_peak_3833	wt_h3k4me3.q.05_peak_3833	0.200816	5.32343	6.1584	0.013079	0.155418
wt_h3k4me3.q.05_peak_12648	wt_h3k4me3.q.05_peak_12648	0.180582	5.63388	6.1569	0.0130901	0.155432
wt_h3k4me3.q.05_peak_4592	wt_h3k4me3.q.05_peak_4592	-0.988753	1.01028	6.15613	0.0130958	0.155432
wt_h3k4me3.q.05_peak_18764	wt_h3k4me3.q.05_peak_18764	0.253316	4.64888	6.1489	0.0131494	0.155976
wt_h3k4me3.q.05_peak_1036	wt_h3k4me3.q.05_peak_1036	0.202563	5.29568	6.14741	0.0131605	0.156014
wt_h3k4me3.q.05_peak_4478	wt_h3k4me3.q.05_peak_4478	0.310842	4.10543	6.14541	0.0131754	0.156048
wt_h3k4me3.q.05_peak_11233	wt_h3k4me3.q.05_peak_11233	0.438388	3.10031	6.14466	0.013181	0.156048
wt_h3k4me3.q.05_peak_3470	wt_h3k4me3.q.05_peak_3470	-0.384202	3.46573	6.14387	0.0131868	0.156048
wt_h3k4me3.q.05_peak_7383	wt_h3k4me3.q.05_peak_7383	0.140585	6.37262	6.14251	0.013197	0.156075
wt_h3k4me3.q.05_peak_11593	wt_h3k4me3.q.05_peak_11593	-0.575524	3.30127	6.13335	0.0132655	0.156754
wt_h3k4me3.q.05_peak_7441	wt_h3k4me3.q.05_peak_7441	0.14244	6.51518	6.13236	0.0132729	0.156754
wt_h3k4me3.q.05_peak_19661	wt_h3k4me3.q.05_peak_19661	0.346431	3.75378	6.1317	0.0132779	0.156754
wt_h3k4me3.q.05_peak_17317	wt_h3k4me3.q.05_peak_17317	0.225619	4.97851	6.13023	0.0132889	0.156791
wt_h3k4me3.q.05_peak_5153	wt_h3k4me3.q.05_peak_5153	-0.0824591	8.02574	6.12684	0.0133144	0.156998
wt_h3k4me3.q.05_peak_5786	wt_h3k4me3.q.05_peak_5786	0.382041	3.47763	6.12442	0.0133327	0.157121
wt_h3k4me3.q.05_peak_5702	wt_h3k4me3.q.05_peak_5702	0.166936	6.28329	6.11952	0.0133697	0.157463
wt_h3k4me3.q.05_peak_13057	wt_h3k4me3.q.05_peak_13057	0.133772	6.5147	6.11418	0.0134101	0.157846
wt_h3k4me3.q.05_peak_18582	wt_h3k4me3.q.05_peak_18582	-0.260117	5.06128	6.1073	0.0134625	0.158227
wt_h3k4me3.q.05_peak_8696	wt_h3k4me3.q.05_peak_8696	-1.17452	1.11563	6.10683	0.0134661	0.158227
wt_h3k4me3.q.05_peak_8289	wt_h3k4me3.q.05_peak_8289	0.214674	5.1169	6.10605	0.013472	0.158227
wt_h3k4me3.q.05_peak_1627	wt_h3k4me3.q.05_peak_1627	-0.173848	5.73242	6.10317	0.0134939	0.158227
wt_h3k4me3.q.05_peak_19882	wt_h3k4me3.q.05_peak_19882	0.344797	3.7603	6.1024	0.0134998	0.158227
wt_h3k4me3.q.05_peak_1595	wt_h3k4me3.q.05_peak_1595	0.219464	5.05202	6.10238	0.0135	0.158227
wt_h3k4me3.q.05_peak_7608	wt_h3k4me3.q.05_peak_7608	-0.116453	6.93239	6.10229	0.0135007	0.158227
wt_h3k4me3.q.05_peak_8201	wt_h3k4me3.q.05_peak_8201	0.251419	4.65937	6.10159	0.0135061	0.158227
wt_h3k4me3.q.05_peak_2778	wt_h3k4me3.q.05_peak_2778	0.287662	4.45171	6.09707	0.0135406	0.158539
wt_h3k4me3.q.05_peak_4950	wt_h3k4me3.q.05_peak_4950	-0.229362	4.96448	6.09424	0.0135623	0.1587
wt_h3k4me3.q.05_peak_8267	wt_h3k4me3.q.05_peak_8267	-0.31863	3.97991	6.09027	0.0135929	0.158826
wt_h3k4me3.q.05_peak_8819	wt_h3k4me3.q.05_peak_8819	0.270167	5.3911	6.08961	0.0135979	0.158826
wt_h3k4me3.q.05_peak_3242	wt_h3k4me3.q.05_peak_3242	0.190836	5.45573	6.08891	0.0136033	0.158826
wt_h3k4me3.q.05_peak_1075	wt_h3k4me3.q.05_peak_1075	0.751125	1.73407	6.08729	0.0136158	0.158826
wt_h3k4me3.q.05_peak_17283	wt_h3k4me3.q.05_peak_17283	0.135776	6.46323	6.08609	0.0136251	0.158826
wt_h3k4me3.q.05_peak_2231	wt_h3k4me3.q.05_peak_2231	0.250793	4.66285	6.08599	0.0136258	0.158826
wt_h3k4me3.q.05_peak_16801	wt_h3k4me3.q.05_peak_16801	0.149383	6.17716	6.08478	0.0136351	0.158826
wt_h3k4me3.q.05_peak_19476	wt_h3k4me3.q.05_peak_19476	-0.167295	6.11436	6.0844	0.013638	0.158826
wt_h3k4me3.q.05_peak_20288	wt_h3k4me3.q.05_peak_20288	0.216336	5.36676	6.08296	0.0136492	0.158826
wt_h3k4me3.q.05_peak_16308	wt_h3k4me3.q.05_peak_16308	-0.191503	5.44364	6.0824	0.0136535	0.158826
wt_h3k4me3.q.05_peak_13405	wt_h3k4me3.q.05_peak_13405	-0.230903	4.89958	6.08146	0.0136608	0.158826
wt_h3k4me3.q.05_peak_7697	wt_h3k4me3.q.05_peak_7697	0.176669	5.67841	6.07443	0.0137153	0.15926
wt_h3k4me3.q.05_peak_7940	wt_h3k4me3.q.05_peak_7940	0.46203	3.62766	6.0736	0.0137217	0.15926
wt_h3k4me3.q.05_peak_3679	wt_h3k4me3.q.05_peak_3679	-0.336939	4.77646	6.07354	0.0137222	0.15926
wt_h3k4me3.q.05_peak_1640	wt_h3k4me3.q.05_peak_1640	-0.288937	5.62231	6.07184	0.0137354	0.159321
wt_h3k4me3.q.05_peak_11446	wt_h3k4me3.q.05_peak_11446	0.802908	1.48944	6.06601	0.0137808	0.159755
wt_h3k4me3.q.05_peak_6480	wt_h3k4me3.q.05_peak_6480	0.181335	5.84699	6.06407	0.013796	0.159837
wt_h3k4me3.q.05_peak_4054	wt_h3k4me3.q.05_peak_4054	0.454423	2.98269	6.06238	0.0138091	0.159897
wt_h3k4me3.q.05_peak_4686	wt_h3k4me3.q.05_peak_4686	0.419928	4.11309	6.06085	0.0138211	0.159897
wt_h3k4me3.q.05_peak_6598	wt_h3k4me3.q.05_peak_6598	0.171657	5.75948	6.05973	0.0138299	0.159897
wt_h3k4me3.q.05_peak_17028	wt_h3k4me3.q.05_peak_17028	-0.921095	1.15571	6.05931	0.0138332	0.159897
wt_h3k4me3.q.05_peak_4779	wt_h3k4me3.q.05_peak_4779	0.292879	4.21143	6.05468	0.0138695	0.160179
wt_h3k4me3.q.05_peak_12750	wt_h3k4me3.q.05_peak_12750	-0.474806	2.9084	6.05415	0.0138737	0.160179
wt_h3k4me3.q.05_peak_2936	wt_h3k4me3.q.05_peak_2936	0.252588	4.63299	6.04675	0.0139319	0.160757
wt_h3k4me3.q.05_peak_20582	wt_h3k4me3.q.05_peak_20582	-0.235494	4.83316	6.04148	0.0139735	0.160966
wt_h3k4me3.q.05_peak_4910	wt_h3k4me3.q.05_peak_4910	0.757025	2.47368	6.0414	0.0139742	0.160966
wt_h3k4me3.q.05_peak_1476	wt_h3k4me3.q.05_peak_1476	0.115351	6.94602	6.04078	0.0139791	0.160966
wt_h3k4me3.q.05_peak_14975	wt_h3k4me3.q.05_peak_14975	0.158829	5.98408	6.04038	0.0139823	0.160966
wt_h3k4me3.q.05_peak_8324	wt_h3k4me3.q.05_peak_8324	0.203359	5.33657	6.03699	0.0140091	0.161157
wt_h3k4me3.q.05_peak_1895	wt_h3k4me3.q.05_peak_1895	-0.398185	3.74067	6.03625	0.014015	0.161157
wt_h3k4me3.q.05_peak_1260	wt_h3k4me3.q.05_peak_1260	0.242203	4.75052	6.03298	0.014041	0.161362
wt_h3k4me3.q.05_peak_15700	wt_h3k4me3.q.05_peak_15700	0.230191	4.89662	6.03009	0.014064	0.161533
wt_h3k4me3.q.05_peak_6451	wt_h3k4me3.q.05_peak_6451	-0.321082	3.94317	6.02633	0.014094	0.161761
wt_h3k4me3.q.05_peak_5188	wt_h3k4me3.q.05_peak_5188	0.213853	5.21973	6.02557	0.0141001	0.161761
wt_h3k4me3.q.05_peak_18589	wt_h3k4me3.q.05_peak_18589	0.177794	5.78845	6.02176	0.0141305	0.161849
wt_h3k4me3.q.05_peak_7948	wt_h3k4me3.q.05_peak_7948	0.316566	3.98269	6.02172	0.0141309	0.161849
wt_h3k4me3.q.05_peak_8180	wt_h3k4me3.q.05_peak_8180	0.206798	5.45773	6.02156	0.0141322	0.161849
wt_h3k4me3.q.05_peak_18023	wt_h3k4me3.q.05_peak_18023	-0.577736	2.32344	6.02053	0.0141404	0.161851
wt_h3k4me3.q.05_peak_7118	wt_h3k4me3.q.05_peak_7118	0.346242	4.21381	6.01796	0.014161	0.161994
wt_h3k4me3.q.05_peak_5814	wt_h3k4me3.q.05_peak_5814	0.196193	5.35605	6.01118	0.0142155	0.162524
wt_h3k4me3.q.05_peak_11684	wt_h3k4me3.q.05_peak_11684	-0.189136	5.46174	6.00712	0.0142483	0.162805
wt_h3k4me3.q.05_peak_10600	wt_h3k4me3.q.05_peak_10600	-0.824969	1.40883	6.00471	0.0142677	0.162862
wt_h3k4me3.q.05_peak_1926	wt_h3k4me3.q.05_peak_1926	-0.161886	5.91863	6.00448	0.0142696	0.162862
wt_h3k4me3.q.05_peak_11214	wt_h3k4me3.q.05_peak_11214	0.212958	5.27194	5.99822	0.0143203	0.163271
wt_h3k4me3.q.05_peak_18910	wt_h3k4me3.q.05_peak_18910	0.126648	6.65063	5.99685	0.0143315	0.163271
wt_h3k4me3.q.05_peak_18631	wt_h3k4me3.q.05_peak_18631	0.64711	2.02116	5.99682	0.0143317	0.163271
wt_h3k4me3.q.05_peak_5882	wt_h3k4me3.q.05_peak_5882	0.285553	4.26966	5.99601	0.0143382	0.163271
wt_h3k4me3.q.05_peak_2127	wt_h3k4me3.q.05_peak_2127	-0.5565	2.4171	5.99369	0.0143572	0.163393
wt_h3k4me3.q.05_peak_15469	wt_h3k4me3.q.05_peak_15469	-0.122335	6.7542	5.99105	0.0143787	0.163544
wt_h3k4me3.q.05_peak_15815	wt_h3k4me3.q.05_peak_15815	-1.08286	0.773239	5.98958	0.0143907	0.163587
wt_h3k4me3.q.05_peak_5802	wt_h3k4me3.q.05_peak_5802	-0.131627	6.65588	5.98554	0.0144236	0.163826
wt_h3k4me3.q.05_peak_19600	wt_h3k4me3.q.05_peak_19600	0.326023	3.89069	5.98499	0.0144281	0.163826
wt_h3k4me3.q.05_peak_13985	wt_h3k4me3.q.05_peak_13985	0.236134	5.29903	5.97986	0.0144702	0.164182
wt_h3k4me3.q.05_peak_3670	wt_h3k4me3.q.05_peak_3670	0.104326	7.52358	5.97915	0.014476	0.164182
wt_h3k4me3.q.05_peak_20675	wt_h3k4me3.q.05_peak_20675	-0.358009	3.6241	5.97487	0.0145111	0.164487
wt_h3k4me3.q.05_peak_15663	wt_h3k4me3.q.05_peak_15663	0.298404	4.13831	5.97091	0.0145438	0.164764
wt_h3k4me3.q.05_peak_15378	wt_h3k4me3.q.05_peak_15378	-0.144396	6.24955	5.96936	0.0145566	0.164799
wt_h3k4me3.q.05_peak_8678	wt_h3k4me3.q.05_peak_8678	-0.350307	3.68356	5.968	0.0145678	0.164799
wt_h3k4me3.q.05_peak_15370	wt_h3k4me3.q.05_peak_15370	0.392243	3.52812	5.96752	0.0145717	0.164799
wt_h3k4me3.q.05_peak_15192	wt_h3k4me3.q.05_peak_15192	-1.32384	1.26967	5.96511	0.0145917	0.164931
wt_h3k4me3.q.05_peak_13660	wt_h3k4me3.q.05_peak_13660	-0.163669	5.87578	5.96187	0.0146186	0.165141
wt_h3k4me3.q.05_peak_5855	wt_h3k4me3.q.05_peak_5855	0.188669	5.45673	5.95583	0.0146687	0.165613
wt_h3k4me3.q.05_peak_20106	wt_h3k4me3.q.05_peak_20106	-1.14896	0.638309	5.95449	0.0146799	0.165646
wt_h3k4me3.q.05_peak_6311	wt_h3k4me3.q.05_peak_6311	-0.144809	6.30351	5.95331	0.0146896	0.165662
wt_h3k4me3.q.05_peak_216	wt_h3k4me3.q.05_peak_216	0.126442	6.64316	5.94809	0.0147332	0.166059
wt_h3k4me3.q.05_peak_6263	wt_h3k4me3.q.05_peak_6263	-0.167819	5.79799	5.9465	0.0147465	0.166115
wt_h3k4me3.q.05_peak_13785	wt_h3k4me3.q.05_peak_13785	-0.377232	3.55085	5.94293	0.0147764	0.166358
wt_h3k4me3.q.05_peak_13883	wt_h3k4me3.q.05_peak_13883	0.112405	6.9993	5.9387	0.0148119	0.166664
wt_h3k4me3.q.05_peak_325	wt_h3k4me3.q.05_peak_325	0.282767	4.28329	5.93634	0.0148318	0.166792
wt_h3k4me3.q.05_peak_16860	wt_h3k4me3.q.05_peak_16860	0.324183	3.99931	5.93453	0.014847	0.166797
wt_h3k4me3.q.05_peak_9788	wt_h3k4me3.q.05_peak_9788	-0.701773	1.93167	5.93347	0.014856	0.166797
wt_h3k4me3.q.05_peak_1545	wt_h3k4me3.q.05_peak_1545	-0.206592	5.18626	5.93331	0.0148573	0.166797
wt_h3k4me3.q.05_peak_14349	wt_h3k4me3.q.05_peak_14349	-0.95143	1.05335	5.92946	0.0148898	0.167067
wt_h3k4me3.q.05_peak_12628	wt_h3k4me3.q.05_peak_12628	-0.387384	3.39215	5.92705	0.0149102	0.167202
wt_h3k4me3.q.05_peak_18494	wt_h3k4me3.q.05_peak_18494	0.167554	6.72702	5.92508	0.0149268	0.167295
wt_h3k4me3.q.05_peak_13817	wt_h3k4me3.q.05_peak_13817	-0.144423	6.23735	5.92337	0.0149413	0.167363
wt_h3k4me3.q.05_peak_9989	wt_h3k4me3.q.05_peak_9989	-0.168687	5.77646	5.921	0.0149614	0.167494
wt_h3k4me3.q.05_peak_13159	wt_h3k4me3.q.05_peak_13159	-0.47163	2.98825	5.91631	0.0150013	0.167846
wt_h3k4me3.q.05_peak_3305	wt_h3k4me3.q.05_peak_3305	0.125016	7.05798	5.90623	0.0150874	0.168631
wt_h3k4me3.q.05_peak_6577	wt_h3k4me3.q.05_peak_6577	0.119226	6.81058	5.90612	0.0150884	0.168631
wt_h3k4me3.q.05_peak_1512	wt_h3k4me3.q.05_peak_1512	-0.46843	3.16064	5.9015	0.015128	0.168888
wt_h3k4me3.q.05_peak_15880	wt_h3k4me3.q.05_peak_15880	0.659938	2.13581	5.90145	0.0151284	0.168888
wt_h3k4me3.q.05_peak_13295	wt_h3k4me3.q.05_peak_13295	0.817836	1.40883	5.89988	0.0151419	0.168945
wt_h3k4me3.q.05_peak_16873	wt_h3k4me3.q.05_peak_16873	0.373504	3.59524	5.89887	0.0151506	0.168947
wt_h3k4me3.q.05_peak_17668	wt_h3k4me3.q.05_peak_17668	0.124691	6.67237	5.89662	0.01517	0.169015
wt_h3k4me3.q.05_peak_17536	wt_h3k4me3.q.05_peak_17536	0.260604	4.50698	5.89619	0.0151737	0.169015
wt_h3k4me3.q.05_peak_18491	wt_h3k4me3.q.05_peak_18491	0.164256	5.84776	5.89124	0.0152164	0.169374
wt_h3k4me3.q.05_peak_3944	wt_h3k4me3.q.05_peak_3944	0.465164	2.87877	5.89048	0.0152229	0.169374
wt_h3k4me3.q.05_peak_2474	wt_h3k4me3.q.05_peak_2474	-0.447733	3.2833	5.8894	0.0152323	0.169384
wt_h3k4me3.q.05_peak_14577	wt_h3k4me3.q.05_peak_14577	0.222155	4.96447	5.88676	0.0152551	0.169543
wt_h3k4me3.q.05_peak_5996	wt_h3k4me3.q.05_peak_5996	-0.140115	6.31738	5.88209	0.0152957	0.169899
wt_h3k4me3.q.05_peak_11697	wt_h3k4me3.q.05_peak_11697	-0.113012	6.96765	5.88027	0.0153114	0.169979
wt_h3k4me3.q.05_peak_9404	wt_h3k4me3.q.05_peak_9404	-0.197644	5.30128	5.87731	0.0153373	0.169981
wt_h3k4me3.q.05_peak_1956	wt_h3k4me3.q.05_peak_1956	0.116105	6.884	5.87642	0.015345	0.169981
wt_h3k4me3.q.05_peak_20666	wt_h3k4me3.q.05_peak_20666	-0.10568	7.38295	5.87618	0.0153471	0.169981
wt_h3k4me3.q.05_peak_6462	wt_h3k4me3.q.05_peak_6462	0.174264	5.66978	5.8761	0.0153478	0.169981
wt_h3k4me3.q.05_peak_13891	wt_h3k4me3.q.05_peak_13891	-0.235251	4.79561	5.87464	0.0153605	0.169981
wt_h3k4me3.q.05_peak_7456	wt_h3k4me3.q.05_peak_7456	-0.132825	6.47566	5.87381	0.0153677	0.169981
wt_h3k4me3.q.05_peak_9060	wt_h3k4me3.q.05_peak_9060	0.682082	1.95457	5.8734	0.0153714	0.169981
wt_h3k4me3.q.05_peak_11943	wt_h3k4me3.q.05_peak_11943	-0.704378	1.77324	5.86729	0.0154248	0.170328
wt_h3k4me3.q.05_peak_18616	wt_h3k4me3.q.05_peak_18616	0.265339	4.73407	5.86677	0.0154294	0.170328
wt_h3k4me3.q.05_peak_8513	wt_h3k4me3.q.05_peak_8513	-0.56271	2.3582	5.86574	0.0154383	0.170328
wt_h3k4me3.q.05_peak_10981	wt_h3k4me3.q.05_peak_10981	-0.105311	7.1799	5.86252	0.0154666	0.170328
wt_h3k4me3.q.05_peak_9597	wt_h3k4me3.q.05_peak_9597	-0.163109	5.92081	5.86214	0.01547	0.170328
wt_h3k4me3.q.05_peak_17868	wt_h3k4me3.q.05_peak_17868	-0.890431	1.1947	5.86201	0.0154711	0.170328
wt_h3k4me3.q.05_peak_10077	wt_h3k4me3.q.05_peak_10077	-0.890431	1.1947	5.86201	0.0154711	0.170328
wt_h3k4me3.q.05_peak_15398	wt_h3k4me3.q.05_peak_15398	-0.890431	1.1947	5.86201	0.0154711	0.170328
wt_h3k4me3.q.05_peak_5575	wt_h3k4me3.q.05_peak_5575	-0.749925	1.79877	5.85422	0.0155398	0.170923
wt_h3k4me3.q.05_peak_1032	wt_h3k4me3.q.05_peak_1032	-0.263389	4.46573	5.85393	0.0155423	0.170923
wt_h3k4me3.q.05_peak_15282	wt_h3k4me3.q.05_peak_15282	-0.192411	5.37315	5.85149	0.0155639	0.170991
wt_h3k4me3.q.05_peak_2962	wt_h3k4me3.q.05_peak_2962	-0.0850542	7.84987	5.85051	0.0155725	0.170991
wt_h3k4me3.q.05_peak_14112	wt_h3k4me3.q.05_peak_14112	-0.12512	6.64976	5.85031	0.0155743	0.170991
wt_h3k4me3.q.05_peak_1384	wt_h3k4me3.q.05_peak_1384	-0.802728	1.44162	5.84584	0.0156139	0.171332
wt_h3k4me3.q.05_peak_612	wt_h3k4me3.q.05_peak_612	0.153931	6.02793	5.84394	0.0156308	0.171423
wt_h3k4me3.q.05_peak_935	wt_h3k4me3.q.05_peak_935	-0.119539	8.20549	5.84047	0.0156616	0.171666
wt_h3k4me3.q.05_peak_7029	wt_h3k4me3.q.05_peak_7029	-0.173807	5.90473	5.83533	0.0157075	0.172074
wt_h3k4me3.q.05_peak_2023	wt_h3k4me3.q.05_peak_2023	0.105288	7.1735	5.833	0.0157283	0.172207
wt_h3k4me3.q.05_peak_5060	wt_h3k4me3.q.05_peak_5060	-0.20793	5.14206	5.83066	0.0157492	0.172297
wt_h3k4me3.q.05_peak_6498	wt_h3k4me3.q.05_peak_6498	-0.645725	1.98825	5.83015	0.0157538	0.172297
wt_h3k4me3.q.05_peak_4273	wt_h3k4me3.q.05_peak_4273	0.199133	6.15509	5.82799	0.0157732	0.172414
wt_h3k4me3.q.05_peak_11065	wt_h3k4me3.q.05_peak_11065	0.163876	5.83779	5.82453	0.0158042	0.172659
wt_h3k4me3.q.05_peak_4383	wt_h3k4me3.q.05_peak_4383	-0.108144	7.08775	5.82284	0.0158194	0.17273
wt_h3k4me3.q.05_peak_15156	wt_h3k4me3.q.05_peak_15156	-0.156898	5.96448	5.81789	0.015864	0.173021
wt_h3k4me3.q.05_peak_17665	wt_h3k4me3.q.05_peak_17665	0.163695	5.83932	5.81778	0.0158649	0.173021
wt_h3k4me3.q.05_peak_15485	wt_h3k4me3.q.05_peak_15485	0.155713	5.98686	5.81699	0.0158721	0.173021
wt_h3k4me3.q.05_peak_7041	wt_h3k4me3.q.05_peak_7041	0.166072	5.85842	5.81529	0.0158875	0.173093
wt_h3k4me3.q.05_peak_19720	wt_h3k4me3.q.05_peak_19720	0.0968019	7.42889	5.81197	0.0159175	0.173326
wt_h3k4me3.q.05_peak_11629	wt_h3k4me3.q.05_peak_11629	0.735488	1.65238	5.81087	0.0159275	0.173339
wt_h3k4me3.q.05_peak_14522	wt_h3k4me3.q.05_peak_14522	0.299983	4.08223	5.80163	0.0160113	0.174157
wt_h3k4me3.q.05_peak_19546	wt_h3k4me3.q.05_peak_19546	-0.223113	4.93023	5.80052	0.0160214	0.174172
wt_h3k4me3.q.05_peak_10377	wt_h3k4me3.q.05_peak_10377	0.161781	5.86901	5.79801	0.0160443	0.17424
wt_h3k4me3.q.05_peak_17454	wt_h3k4me3.q.05_peak_17454	-0.114843	6.89662	5.79792	0.0160452	0.17424
wt_h3k4me3.q.05_peak_8955	wt_h3k4me3.q.05_peak_8955	-0.129188	6.53859	5.79329	0.0160874	0.174603
wt_h3k4me3.q.05_peak_17770	wt_h3k4me3.q.05_peak_17770	-0.555492	2.37528	5.79135	0.0161053	0.174702
wt_h3k4me3.q.05_peak_9587	wt_h3k4me3.q.05_peak_9587	-0.154675	5.99862	5.78619	0.0161526	0.175119
wt_h3k4me3.q.05_peak_6552	wt_h3k4me3.q.05_peak_6552	0.116988	6.83701	5.78516	0.016162	0.175126
wt_h3k4me3.q.05_peak_17580	wt_h3k4me3.q.05_peak_17580	0.346562	3.66979	5.78311	0.0161809	0.175161
wt_h3k4me3.q.05_peak_17870	wt_h3k4me3.q.05_peak_17870	-0.900059	1.30573	5.78288	0.016183	0.175161
wt_h3k4me3.q.05_peak_9086	wt_h3k4me3.q.05_peak_9086	0.115016	6.88809	5.7817	0.0161938	0.175161
wt_h3k4me3.q.05_peak_3512	wt_h3k4me3.q.05_peak_3512	-0.203629	5.18989	5.77919	0.016217	0.175161
wt_h3k4me3.q.05_peak_16614	wt_h3k4me3.q.05_peak_16614	0.113717	6.92189	5.77897	0.0162191	0.175161
wt_h3k4me3.q.05_peak_18264	wt_h3k4me3.q.05_peak_18264	-0.437232	3.02117	5.77801	0.0162279	0.175161
wt_h3k4me3.q.05_peak_16925	wt_h3k4me3.q.05_peak_16925	-0.121368	7.42353	5.7768	0.0162391	0.175161
wt_h3k4me3.q.05_peak_5592	wt_h3k4me3.q.05_peak_5592	0.444325	2.97711	5.77588	0.0162476	0.175161
wt_h3k4me3.q.05_peak_20300	wt_h3k4me3.q.05_peak_20300	-0.403904	3.72077	5.77538	0.0162522	0.175161
wt_h3k4me3.q.05_peak_13943	wt_h3k4me3.q.05_peak_13943	0.134724	6.90067	5.77528	0.0162531	0.175161
wt_h3k4me3.q.05_peak_5628	wt_h3k4me3.q.05_peak_5628	0.43293	3.04803	5.77367	0.016268	0.175227
wt_h3k4me3.q.05_peak_656	wt_h3k4me3.q.05_peak_656	-0.0951908	7.47021	5.76878	0.0163134	0.17562
wt_h3k4me3.q.05_peak_9578	wt_h3k4me3.q.05_peak_9578	-0.162544	5.8447	5.75808	0.016413	0.176553
wt_h3k4me3.q.05_peak_8785	wt_h3k4me3.q.05_peak_8785	-0.179439	7.11087	5.75757	0.0164177	0.176553
wt_h3k4me3.q.05_peak_3591	wt_h3k4me3.q.05_peak_3591	-0.150668	7.13519	5.75568	0.0164354	0.176647
wt_h3k4me3.q.05_peak_546	wt_h3k4me3.q.05_peak_546	0.422081	3.18505	5.75342	0.0164566	0.17678
wt_h3k4me3.q.05_peak_6199	wt_h3k4me3.q.05_peak_6199	0.391803	3.31903	5.75185	0.0164713	0.176819
wt_h3k4me3.q.05_peak_11342	wt_h3k4me3.q.05_peak_11342	-0.187049	5.43043	5.75113	0.016478	0.176819
wt_h3k4me3.q.05_peak_205	wt_h3k4me3.q.05_peak_205	0.0581713	9.08619	5.74891	0.0164989	0.176858
wt_h3k4me3.q.05_peak_10768	wt_h3k4me3.q.05_peak_10768	-0.612911	2.10544	5.74886	0.0164994	0.176858
wt_h3k4me3.q.05_peak_9592	wt_h3k4me3.q.05_peak_9592	-0.162204	5.84777	5.7462	0.0165243	0.176967
wt_h3k4me3.q.05_peak_16239	wt_h3k4me3.q.05_peak_16239	0.366338	3.50504	5.74589	0.0165273	0.176967
wt_h3k4me3.q.05_peak_15105	wt_h3k4me3.q.05_peak_15105	-0.0939115	7.50602	5.74491	0.0165365	0.17697
wt_h3k4me3.q.05_peak_3743	wt_h3k4me3.q.05_peak_3743	-0.751635	1.58059	5.73813	0.0166005	0.17742
wt_h3k4me3.q.05_peak_12802	wt_h3k4me3.q.05_peak_12802	-0.110965	6.98548	5.73778	0.0166038	0.17742
wt_h3k4me3.q.05_peak_15860	wt_h3k4me3.q.05_peak_15860	-0.471432	2.80509	5.73753	0.0166061	0.17742
wt_h3k4me3.q.05_peak_564	wt_h3k4me3.q.05_peak_564	0.196517	6.83894	5.73582	0.0166223	0.17742
wt_h3k4me3.q.05_peak_5469	wt_h3k4me3.q.05_peak_5469	0.140284	6.27649	5.73574	0.0166231	0.17742
wt_h3k4me3.q.05_peak_20250	wt_h3k4me3.q.05_peak_20250	-0.188555	5.4026	5.7337	0.0166424	0.177531
wt_h3k4me3.q.05_peak_6767	wt_h3k4me3.q.05_peak_6767	-0.634745	2.01028	5.73231	0.0166556	0.177576
wt_h3k4me3.q.05_peak_679	wt_h3k4me3.q.05_peak_679	-0.178548	5.56114	5.72987	0.0166787	0.177728
wt_h3k4me3.q.05_peak_11049	wt_h3k4me3.q.05_peak_11049	-0.116931	6.82115	5.72047	0.0167683	0.178257
wt_h3k4me3.q.05_peak_5807	wt_h3k4me3.q.05_peak_5807	-0.916922	1.09517	5.71929	0.0167795	0.178257
wt_h3k4me3.q.05_peak_13607	wt_h3k4me3.q.05_peak_13607	-0.51409	2.5658	5.71912	0.0167811	0.178257
wt_h3k4me3.q.05_peak_12435	wt_h3k4me3.q.05_peak_12435	-0.54846	2.39215	5.71884	0.0167838	0.178257
wt_h3k4me3.q.05_peak_19253	wt_h3k4me3.q.05_peak_19253	0.286029	4.1971	5.71873	0.0167849	0.178257
wt_h3k4me3.q.05_peak_731	wt_h3k4me3.q.05_peak_731	-0.763544	1.87277	5.71802	0.0167916	0.178257
wt_h3k4me3.q.05_peak_1708	wt_h3k4me3.q.05_peak_1708	0.127453	6.69889	5.71797	0.0167922	0.178257
wt_h3k4me3.q.05_peak_11122	wt_h3k4me3.q.05_peak_11122	0.154617	7.3439	5.71715	0.0168	0.178257
wt_h3k4me3.q.05_peak_4943	wt_h3k4me3.q.05_peak_4943	0.30523	4.73737	5.71402	0.01683	0.17848
wt_h3k4me3.q.05_peak_3120	wt_h3k4me3.q.05_peak_3120	0.175038	5.67755	5.71249	0.0168446	0.178496
wt_h3k4me3.q.05_peak_8520	wt_h3k4me3.q.05_peak_8520	-0.111849	7.40624	5.7117	0.0168522	0.178496
wt_h3k4me3.q.05_peak_7045	wt_h3k4me3.q.05_peak_7045	-0.390931	3.31461	5.71106	0.0168584	0.178496
wt_h3k4me3.q.05_peak_2248	wt_h3k4me3.q.05_peak_2248	0.615576	2.08482	5.70522	0.0169145	0.178974
wt_h3k4me3.q.05_peak_7244	wt_h3k4me3.q.05_peak_7244	-0.137001	6.33875	5.7045	0.0169215	0.178974
wt_h3k4me3.q.05_peak_7183	wt_h3k4me3.q.05_peak_7183	-0.1595	5.88624	5.70292	0.0169367	0.17904
wt_h3k4me3.q.05_peak_20373	wt_h3k4me3.q.05_peak_20373	-0.216126	6.26166	5.69842	0.0169802	0.179241
wt_h3k4me3.q.05_peak_10223	wt_h3k4me3.q.05_peak_10223	0.0825317	7.90472	5.69644	0.0169994	0.179241
wt_h3k4me3.q.05_peak_8492	wt_h3k4me3.q.05_peak_8492	-0.318927	4.67669	5.69585	0.017005	0.179241
wt_h3k4me3.q.05_peak_3361	wt_h3k4me3.q.05_peak_3361	0.535825	2.4497	5.6954	0.0170095	0.179241
wt_h3k4me3.q.05_peak_65	wt_h3k4me3.q.05_peak_65	0.535825	2.4497	5.69539	0.0170095	0.179241
wt_h3k4me3.q.05_peak_12514	wt_h3k4me3.q.05_peak_12514	0.120021	6.7353	5.6953	0.0170104	0.179241
wt_h3k4me3.q.05_peak_7928	wt_h3k4me3.q.05_peak_7928	0.289596	4.15571	5.69427	0.0170203	0.179241
wt_h3k4me3.q.05_peak_945	wt_h3k4me3.q.05_peak_945	-0.0870316	7.7318	5.69166	0.0170457	0.179241
wt_h3k4me3.q.05_peak_15567	wt_h3k4me3.q.05_peak_15567	-0.113975	7.79601	5.69105	0.0170516	0.179241
wt_h3k4me3.q.05_peak_3739	wt_h3k4me3.q.05_peak_3739	-0.287222	4.17777	5.69069	0.0170552	0.179241
wt_h3k4me3.q.05_peak_16993	wt_h3k4me3.q.05_peak_16993	-0.393068	4.57137	5.69043	0.0170576	0.179241
wt_h3k4me3.q.05_peak_15203	wt_h3k4me3.q.05_peak_15203	-0.165262	5.77806	5.68949	0.0170668	0.179241
wt_h3k4me3.q.05_peak_1993	wt_h3k4me3.q.05_peak_1993	-0.430429	3.0427	5.68888	0.0170727	0.179241
wt_h3k4me3.q.05_peak_10216	wt_h3k4me3.q.05_peak_10216	0.225696	4.86826	5.68532	0.0171075	0.179405
wt_h3k4me3.q.05_peak_15281	wt_h3k4me3.q.05_peak_15281	0.160732	6.37421	5.68451	0.0171153	0.179405
wt_h3k4me3.q.05_peak_15933	wt_h3k4me3.q.05_peak_15933	0.180398	5.51951	5.68444	0.017116	0.179405
wt_h3k4me3.q.05_peak_131	wt_h3k4me3.q.05_peak_131	0.187811	5.40155	5.68358	0.0171244	0.179405
wt_h3k4me3.q.05_peak_4539	wt_h3k4me3.q.05_peak_4539	0.127307	6.55319	5.68018	0.0171576	0.179658
wt_h3k4me3.q.05_peak_10344	wt_h3k4me3.q.05_peak_10344	-0.168486	6.06983	5.67865	0.0171725	0.179668
wt_h3k4me3.q.05_peak_10244	wt_h3k4me3.q.05_peak_10244	-0.861807	1.23267	5.67744	0.0171845	0.179668
wt_h3k4me3.q.05_peak_142	wt_h3k4me3.q.05_peak_142	0.11249	6.92805	5.67732	0.0171856	0.179668
wt_h3k4me3.q.05_peak_19385	wt_h3k4me3.q.05_peak_19385	0.097272	7.37739	5.67606	0.0171979	0.179684
wt_h3k4me3.q.05_peak_17598	wt_h3k4me3.q.05_peak_17598	0.121749	6.68612	5.67287	0.0172293	0.179684
wt_h3k4me3.q.05_peak_2421	wt_h3k4me3.q.05_peak_2421	-0.817742	1.3582	5.67284	0.0172296	0.179684
wt_h3k4me3.q.05_peak_917	wt_h3k4me3.q.05_peak_917	-0.817742	1.3582	5.67283	0.0172296	0.179684
wt_h3k4me3.q.05_peak_20088	wt_h3k4me3.q.05_peak_20088	-0.49703	2.6938	5.67143	0.0172434	0.179684
wt_h3k4me3.q.05_peak_9395	wt_h3k4me3.q.05_peak_9395	0.266186	4.39005	5.67	0.0172574	0.179684
wt_h3k4me3.q.05_peak_18269	wt_h3k4me3.q.05_peak_18269	0.206755	5.11817	5.66992	0.0172582	0.179684
wt_h3k4me3.q.05_peak_19883	wt_h3k4me3.q.05_peak_19883	-0.190615	5.3539	5.66771	0.01728	0.179684
wt_h3k4me3.q.05_peak_2058	wt_h3k4me3.q.05_peak_2058	0.241655	5.34526	5.6677	0.0172801	0.179684
wt_h3k4me3.q.05_peak_19384	wt_h3k4me3.q.05_peak_19384	0.256205	4.76516	5.66726	0.0172844	0.179684
wt_h3k4me3.q.05_peak_16501	wt_h3k4me3.q.05_peak_16501	-0.251065	4.55647	5.66707	0.0172863	0.179684
wt_h3k4me3.q.05_peak_19698	wt_h3k4me3.q.05_peak_19698	-0.217887	4.96448	5.66483	0.0173084	0.179803
wt_h3k4me3.q.05_peak_254	wt_h3k4me3.q.05_peak_254	-0.56186	2.31461	5.66317	0.0173248	0.179803
wt_h3k4me3.q.05_peak_9319	wt_h3k4me3.q.05_peak_9319	-0.56186	2.31461	5.66316	0.0173249	0.179803
wt_h3k4me3.q.05_peak_3904	wt_h3k4me3.q.05_peak_3904	0.17119	5.66632	5.65776	0.0173783	0.180149
wt_h3k4me3.q.05_peak_20602	wt_h3k4me3.q.05_peak_20602	-0.212043	5.04136	5.65745	0.0173814	0.180149
wt_h3k4me3.q.05_peak_3751	wt_h3k4me3.q.05_peak_3751	-0.235997	4.83007	5.65706	0.0173853	0.180149
wt_h3k4me3.q.05_peak_6345	wt_h3k4me3.q.05_peak_6345	-0.144845	6.15941	5.65442	0.0174114	0.180326
wt_h3k4me3.q.05_peak_8559	wt_h3k4me3.q.05_peak_8559	0.297407	4.06917	5.65105	0.0174449	0.180578
wt_h3k4me3.q.05_peak_14938	wt_h3k4me3.q.05_peak_14938	0.132485	6.42326	5.64282	0.017527	0.181321
wt_h3k4me3.q.05_peak_15253	wt_h3k4me3.q.05_peak_15253	-0.350052	3.94602	5.64165	0.0175387	0.181321
wt_h3k4me3.q.05_peak_2613	wt_h3k4me3.q.05_peak_2613	0.384339	3.34526	5.64112	0.017544	0.181321
wt_h3k4me3.q.05_peak_18882	wt_h3k4me3.q.05_peak_18882	0.160293	5.85538	5.64	0.0175552	0.181343
wt_h3k4me3.q.05_peak_11309	wt_h3k4me3.q.05_peak_11309	-0.226487	5.53194	5.63904	0.0175648	0.181348
wt_h3k4me3.q.05_peak_4520	wt_h3k4me3.q.05_peak_4520	-0.624138	2.03197	5.63777	0.0175776	0.181384
wt_h3k4me3.q.05_peak_5052	wt_h3k4me3.q.05_peak_5052	0.136045	6.342	5.63688	0.0175865	0.181384
wt_h3k4me3.q.05_peak_11340	wt_h3k4me3.q.05_peak_11340	0.144194	6.168	5.63531	0.0176022	0.181436
wt_h3k4me3.q.05_peak_5833	wt_h3k4me3.q.05_peak_5833	-0.119167	6.99621	5.63456	0.0176098	0.181436
wt_h3k4me3.q.05_peak_17167	wt_h3k4me3.q.05_peak_17167	0.229455	4.80666	5.63107	0.0176448	0.18169
wt_h3k4me3.q.05_peak_18389	wt_h3k4me3.q.05_peak_18389	-0.12923	7.07703	5.62968	0.0176588	0.18169
wt_h3k4me3.q.05_peak_14487	wt_h3k4me3.q.05_peak_14487	-0.648249	1.93167	5.62939	0.0176618	0.18169
wt_h3k4me3.q.05_peak_17845	wt_h3k4me3.q.05_peak_17845	-0.649286	2.12576	5.62769	0.0176789	0.181772
wt_h3k4me3.q.05_peak_14974	wt_h3k4me3.q.05_peak_14974	-0.182558	5.66111	5.62592	0.0176968	0.181863
wt_h3k4me3.q.05_peak_8340	wt_h3k4me3.q.05_peak_8340	0.512679	2.55084	5.62316	0.0177246	0.182055
wt_h3k4me3.q.05_peak_7716	wt_h3k4me3.q.05_peak_7716	0.109681	6.98998	5.62035	0.0177531	0.182167
wt_h3k4me3.q.05_peak_16659	wt_h3k4me3.q.05_peak_16659	-0.136058	6.33712	5.62028	0.0177539	0.182167
wt_h3k4me3.q.05_peak_15330	wt_h3k4me3.q.05_peak_15330	-0.316758	3.88176	5.61834	0.0177735	0.182258
wt_h3k4me3.q.05_peak_19612	wt_h3k4me3.q.05_peak_19612	-0.260464	5.43655	5.61745	0.0177825	0.182258
wt_h3k4me3.q.05_peak_1279	wt_h3k4me3.q.05_peak_1279	0.202536	5.16433	5.61669	0.0177902	0.182258
wt_h3k4me3.q.05_peak_16830	wt_h3k4me3.q.05_peak_16830	0.156881	5.91206	5.6136	0.0178216	0.182486
wt_h3k4me3.q.05_peak_5393	wt_h3k4me3.q.05_peak_5393	0.174693	5.59433	5.60969	0.0178614	0.182799
wt_h3k4me3.q.05_peak_17701	wt_h3k4me3.q.05_peak_17701	0.135194	6.84086	5.60815	0.0178771	0.182866
wt_h3k4me3.q.05_peak_6083	wt_h3k4me3.q.05_peak_6083	0.159255	5.86448	5.60128	0.0179473	0.183392
wt_h3k4me3.q.05_peak_18467	wt_h3k4me3.q.05_peak_18467	0.204781	5.81294	5.59999	0.0179606	0.183392
wt_h3k4me3.q.05_peak_1834	wt_h3k4me3.q.05_peak_1834	0.193163	5.29792	5.59997	0.0179608	0.183392
wt_h3k4me3.q.05_peak_14294	wt_h3k4me3.q.05_peak_14294	-0.110342	6.96554	5.59904	0.0179703	0.183392
wt_h3k4me3.q.05_peak_19685	wt_h3k4me3.q.05_peak_19685	0.222338	4.88921	5.59827	0.0179782	0.183392
wt_h3k4me3.q.05_peak_13940	wt_h3k4me3.q.05_peak_13940	-0.147104	6.09839	5.59773	0.0179838	0.183392
wt_h3k4me3.q.05_peak_11791	wt_h3k4me3.q.05_peak_11791	-0.130416	6.45774	5.5957	0.0180047	0.183421
wt_h3k4me3.q.05_peak_9465	wt_h3k4me3.q.05_peak_9465	0.673963	1.92008	5.59523	0.0180094	0.183421
wt_h3k4me3.q.05_peak_20461	wt_h3k4me3.q.05_peak_20461	-0.186048	5.40572	5.59461	0.0180159	0.183421
wt_h3k4me3.q.05_peak_7510	wt_h3k4me3.q.05_peak_7510	0.234112	4.73902	5.59331	0.0180292	0.183421
wt_h3k4me3.q.05_peak_6624	wt_h3k4me3.q.05_peak_6624	-0.365389	3.47368	5.59298	0.0180326	0.183421
wt_h3k4me3.q.05_peak_15868	wt_h3k4me3.q.05_peak_15868	0.192854	5.30015	5.59089	0.0180541	0.183546
wt_h3k4me3.q.05_peak_2792	wt_h3k4me3.q.05_peak_2792	-0.087811	7.67476	5.58908	0.0180728	0.183556
wt_h3k4me3.q.05_peak_15773	wt_h3k4me3.q.05_peak_15773	-0.554419	2.33221	5.58901	0.0180735	0.183556
wt_h3k4me3.q.05_peak_7116	wt_h3k4me3.q.05_peak_7116	-0.792076	1.68013	5.58767	0.0180873	0.183602
wt_h3k4me3.q.05_peak_19549	wt_h3k4me3.q.05_peak_19549	-0.143047	6.17777	5.58344	0.0181311	0.183952
wt_h3k4me3.q.05_peak_19356	wt_h3k4me3.q.05_peak_19356	-0.0861522	7.73262	5.57969	0.0181699	0.184252
wt_h3k4me3.q.05_peak_2879	wt_h3k4me3.q.05_peak_2879	-0.31427	4.07441	5.57519	0.0182167	0.184633
wt_h3k4me3.q.05_peak_9133	wt_h3k4me3.q.05_peak_9133	0.116234	6.79916	5.57112	0.0182591	0.184915
wt_h3k4me3.q.05_peak_10224	wt_h3k4me3.q.05_peak_10224	-0.400323	3.21381	5.57074	0.0182631	0.184915
wt_h3k4me3.q.05_peak_5667	wt_h3k4me3.q.05_peak_5667	-0.229294	4.79243	5.56954	0.0182756	0.184927
wt_h3k4me3.q.05_peak_1602	wt_h3k4me3.q.05_peak_1602	0.315067	3.88475	5.56856	0.0182858	0.184927
wt_h3k4me3.q.05_peak_14624	wt_h3k4me3.q.05_peak_14624	0.170176	5.66024	5.56795	0.0182922	0.184927
wt_h3k4me3.q.05_peak_8431	wt_h3k4me3.q.05_peak_8431	0.156964	5.89809	5.5667	0.0183052	0.184931
wt_h3k4me3.q.05_peak_13472	wt_h3k4me3.q.05_peak_13472	0.332222	4.08222	5.56585	0.0183141	0.184931
wt_h3k4me3.q.05_peak_16191	wt_h3k4me3.q.05_peak_16191	-0.160122	5.83856	5.56525	0.0183204	0.184931
wt_h3k4me3.q.05_peak_3902	wt_h3k4me3.q.05_peak_3902	0.632724	2.70735	5.5641	0.0183325	0.184959
wt_h3k4me3.q.05_peak_8788	wt_h3k4me3.q.05_peak_8788	0.196152	5.24317	5.56181	0.0183564	0.184967
wt_h3k4me3.q.05_peak_12479	wt_h3k4me3.q.05_peak_12479	-0.522716	3.23735	5.56139	0.0183608	0.184967
wt_h3k4me3.q.05_peak_1290	wt_h3k4me3.q.05_peak_1290	-0.164731	5.75379	5.56137	0.0183611	0.184967
wt_h3k4me3.q.05_peak_7664	wt_h3k4me3.q.05_peak_7664	0.50691	2.5658	5.55967	0.0183789	0.185053
wt_h3k4me3.q.05_peak_3824	wt_h3k4me3.q.05_peak_3824	0.17151	5.63477	5.55829	0.0183934	0.185105
wt_h3k4me3.q.05_peak_7841	wt_h3k4me3.q.05_peak_7841	-0.695454	1.73407	5.55484	0.0184297	0.185249
wt_h3k4me3.q.05_peak_5386	wt_h3k4me3.q.05_peak_5386	-0.363659	3.65937	5.55373	0.0184414	0.185249
[truncated: 17,935 more rows]

## Sheet: de_h3k4me1_after_RUVr
	genes	logFC	logCPM	LR	PValue	FDR
[truncated: 115,614 more rows]
