# Supplementary material for: MYT1L is required for suppressing earlier neuronal development programs in the adult mouse brain
Source: Genome Res. 2023 Apr;33(4):541–56. doi: 10.1101/gr.277413.122 (PMC10234307; doi:10.1101/gr.277413.122)
Supplement: Supplemental Material [file supp_gr.277413.122_Supplemental_Table_S7.xlsx]

## Sheet: Sheet1
Supplemental Table S7. Statistical analyses for all experiments.
FIGURE	VARIABLE	COMPARISON	DATA STRUCTURE	STATISTICAL TEST	OUTPUT
1G	Brain Weight	genotype	normal	One sample t test	t(8)=2.665, p =.0286
1H	CTIP2	genotype	normal	One sample t test	t(11)=3.337, p =.0066
1I	BRN2	genotype	non-normal	Mann-Whiteny U	p =.8413
S3G	SP1-Promoter	MYT1L+/MYT1L-		Fisher's exact test	Odds Ratio = 1.209, p =0.0002
	Sp1-Poised Enhancer	MYT1L+/MYT1L-		Fisher's exact test	Odds Ratio = 1.697, p =0.0034
	Sp1-Active Enhancer	MYT1L+/MYT1L-		Fisher's exact test	Odds Ratio = 0.8369, p =0.0678
	ELK1-Promoter	MYT1L+/MYT1L-		Fisher's exact test	Odds Ratio = 4.527, p <0.0001
	ELK1-Poised Enhancer	MYT1L+/MYT1L-		Fisher's exact test	Odds Ratio = 1.904, p =0.4287
	ELK1-Active Enhancer	MYT1L+/MYT1L-		Fisher's exact test	Odds Ratio = 4.294, p <0.0001
	MEF2A-Promoter	MYT1L+/MYT1L-		Fisher's exact test	Odds Ratio = 5.870, p <0.0001
	MEF2A-Poised Enhancer	MYT1L+/MYT1L-		Fisher's exact test	Odds Ratio = 14.95, p <0.0001
	MEF2A-Active Enhancer	MYT1L+/MYT1L-		Fisher's exact test	Odds Ratio = 8.739, p <0.0001
	JUNB-Promoter	MYT1L+/MYT1L-		Fisher's exact test	Odds Ratio = 2.146, p <0.0001
	JUNB-Poised Enhancer	MYT1L+/MYT1L-		Fisher's exact test	Odds Ratio = 5.270, p <0.0001
	JUNB-Active Enhancer	MYT1L+/MYT1L-		Fisher's exact test	Odds Ratio = 3.381, p <0.0001
	NEUROD1-Promoter	MYT1L+/MYT1L-		Fisher's exact test	Odds Ratio = 2.753, p <0.0001
	NEUROD1-Poised Enhancer	MYT1L+/MYT1L-		Fisher's exact test	Odds Ratio = 1.023, p =0.7050
	NEUROD1-Active Enhancer	MYT1L+/MYT1L-		Fisher's exact test	Odds Ratio = 0.8119, p <0.0001
	NEUROD2-Promoter	MYT1L+/MYT1L-		Fisher's exact test	Odds Ratio = 2.145, p <0.0001
	NEUROD2-Poised Enhancer	MYT1L+/MYT1L-		Fisher's exact test	Odds Ratio = 2.604, p <0.0001
	NEUROD2-Active Enhancer	MYT1L+/MYT1L-		Fisher's exact test	Odds Ratio = 1.67, p <0.0001
4F	RNAseq fold changes in PFC	control vs CUT&RUN targets	non-normal	Mann-Whiteny U	p=3.25e-07
S4A	Normalized ATACseq signals	genotype	non-normal	Mann-Whiteny U	p = 0.7634
S4B	Normalized H3K4me3 signals	genotype	non-normal	Mann-Whiteny U	p = 2.31e-06
S4C	Normalized H3K27ac signals	genotype	non-normal	Mann-Whiteny U	p= 2.82e-08
5F	RNAseq fold changes PFC/E14 Active Enhancer targets in PFC	control vs CUT&RUN	non-normal	Mann-Whiteny U	p = 0.47
5F	RNAseq fold changes PFC Active Enhancer targets in PFC	control vs CUT&RUN	non-normal	Mann-Whiteny U	p = 0.059
S5B	Normalized ATACseq signals-Poised Enhancer	genotype	non-normal	Mann-Whiteny U	p = 0.016
S5B	Normalized ATACseq signals-Active Enhancer	genotype	non-normal	Mann-Whiteny U	p = 4.43e-08
S5C	MYT1L positive DARs	MYT1L+/MYT1L-		Fisher's exact test	p < 0.0001
S5D	MYT1L positive DARs	MYT1L+/MYT1L-		Fisher's exact test	p < 0.0001
S5E	Normalized H3K4me1 signals-Poised Enhancer	genotype	non-normal	Mann-Whiteny U	p =0.3085
S5E	Normalized H3K4me1 signals-Active Enhancer	genotype	non-normal	Mann-Whiteny U	p =1.16e-06
S5F	Normalized H3K27ac signals-Poised Enhancer	genotype	non-normal	Mann-Whiteny U	p =2.88e-27
S5F	Normalized H3K27ac signals-Active Enhancer	genotype	non-normal	Mann-Whiteny U	p =5.47-e32
6B	MYT1L positive diff-H3K27ac Peaks	MYT1L+/MYT1L-		Fisher's exact test	p < 0.0001
6E	Mean ATACseq signals of up diff-H3K2Zac Peaks-Promoter	WT vs Het	non-normal	Mann-Whiteny U	p = 0.93
	Mean ATACseq signals of down diff-H3K2Zac Peaks-Promoter	WT vs Het	non-normal	Mann-Whiteny U	p = 0.98
6F	Mean ATACseq signals of up diff-H3K2Zac Peaks-non-Promoter	WT vs Het	non-normal	Mann-Whiteny U	p = 0.22
	Mean ATACseq signals of down diff-H3K2Zac Peaks-non-Promoter	WT vs Het	non-normal	Mann-Whiteny U	p = 0.59
S6B	MYT1L positive diff-H3K4me3 Peaks	MYT1L+/MYT1L-		Fisher's exact test	p < 0.0196
S6E	Mean ATACseq signals of up diff-H3K4me3 Peaks-Promoter	WT vs Het	non-normal	Mann-Whiteny U	p = 0.99
	Mean ATACseq signals of down diff-H3K4me3 Peaks-Promoter	WT vs Het	non-normal	Mann-Whiteny U	p = 0.99
S6F	Mean ATACseq signals of up diff-H3K4me3 Peaks-non-Promoter	WT vs Het	non-normal	Mann-Whiteny U	p = 0.87
	Mean ATACseq signals of down diff-H3K4me3 Peaks-non-Promoter	WT vs Het	non-normal	Mann-Whiteny U	p = 0.88
S7B	MYT1L positive diff-H3K4me1 Peaks	MYT1L+/MYT1L-		Fisher's exact test	p < 0.0001
S7E	Mean ATACseq signals of up diff-H3K4me1 Peaks-Promoter	WT vs Het	non-normal	Mann-Whiteny U	p = 0.95
	Mean ATACseq signals of down diff-H3K4me1 Peaks-Promoter	WT vs Het	non-normal	Mann-Whiteny U	p = 0.99
S7F	Mean ATACseq signals of up diff-H3K4me1 Peaks-non-Promoter	WT vs Het	non-normal	Mann-Whiteny U	p = 0.32
	Mean ATACseq signals of down diff-H3K4me1 Peaks-non-Promoter	WT vs Het	non-normal	Mann-Whiteny U	p = 0.58
